# Supplementary material for: Clinical relevance of diarrheagenic E.coli detection
Source: Royal Society of Chemistry journal article supplement (doi:10.1039/d3cp02380j), 2013-11-07
Supplement: d3cp02380j1.pdf [file d3cp02380j1.pdf]

**Al distribution and structure stability of H-BEA zeolite at different Si/Al ratios and temperatures: a first-principles study**

*Changdong Li<sup>a,b,c</sup>, Xiuqin Dong<sup>a,b,c</sup>, Haipeng Yu<sup>a,b,c</sup>, Yingzhe Yu<sup>a,b,c,\*</sup>*

<sup>a</sup> Key Laboratory for Green Chemical Technology of Ministry of Education, R&D Center for Petrochemical Technology, Tianjin University, Tianjin 300072, China

<sup>b</sup> Zhejiang Institute of Tianjin University, Ningbo, Zhejiang, 315201, China

<sup>c</sup> State Key Laboratory of Engines, Tianjin University, Tianjin 300072, China

\*Corresponding author

Tel.: +86-22-27405972 18

Fax: +86-22-27406119 19

E-mail address: yzhyu@tju.edu.cn

## Supporting Information

Since zeolite is not a high-entropy alloy structure, its configurational entropy and the contribution of electrons to entropy can be ignored. Therefore, the contribution of entropy in zeolite system mainly comes from vibrational entropy. The standard Gibbs free energy for each structure (H-BEA(n), RAl-BEA(n), and BEA) is calculated by Equation S1 [1, 2]:

$$G^\theta = E_{\text{DFT}} + E_{\text{ZPE}} + U_{\text{vib}}^\theta - T * S_{\text{vib}}^\theta \quad (1)$$

In Equation S1,  $E_{\text{DFT}}$  is the total energy obtained directly from DFT calculations,  $T$  is the temperature of the temperature at which the H-BEA(n) zeolites are synthesized.  $E_{\text{ZPE}}$  is the zero-point-energy (ZPE) correction of the total energy:

$$E_{\text{ZPE}} = \sum_i \frac{h\nu_i}{2} \quad (2)$$

where  $h$  is Planck constant,  $\nu_i$  is the vibration frequency of each atom ( $\text{cm}^{-1}$ ). The small vibrational modes ( $< 50 \text{ cm}^{-1}$ ) associated with the frustrated motions of the surface bound species may have little effect on ZPE and entropy value. De Moor et al. [3] studied the entropy contributions of these frequencies for alkanes and alkenes in FAU and suggested their replacement with  $50 \text{ cm}^{-1}$ . Therefore, in order to obtain consistent results, the immobile adsorbate approach was used for all surface species and the low-lying frequencies were replaced by normal modes of  $50 \text{ cm}^{-1}$ .  $U_{\text{vib}}^\theta$  and  $S_{\text{vib}}^\theta$  is the standard vibrational internal energy and vibrational entropy, respectively, which can be calculated based on the harmonic oscillator approximation:

$$U_{\text{vib}}^\theta = \sum_i \frac{h\nu_i}{e^{\frac{h\nu_i}{k_B T}} - 1} \quad (3)$$

$$S_{\text{vib}}^\theta = k_B \sum_i \left[ \frac{h\nu_i}{k_B T \left( e^{\frac{h\nu_i}{k_B T}} - 1 \right)} - \ln \left( 1 - e^{-\frac{h\nu_i}{k_B T}} \right) \right] \quad (4)$$

where  $k_B$  is Boltzmann constant. The standard Gibbs free energy for each gaseous species (H, Al, and Si) is calculated by Equation S5:

$$G^\theta = E_{\text{DFT}} + E_{\text{ZPE}} + \int_0^T C_p dT - T^* S^\theta \quad (5)$$

The integral of heat capacity  $C_p$  can be separable into translational, rotational and vibrational parts:

$$\int_0^T C_p dT = \int_0^T (k_B + C_{V,\text{trans}} + C_{V,\text{rot}} + C_{V,\text{vib}}) dT \quad (6)$$

The standard entropy  $S^\theta$  can also be calculated by the translational, rotational, and vibrational components, given by:

$$S^\theta = S_{\text{trans}} + S_{\text{rot}} + S_{\text{vib}} \quad (7)$$

$$S_{\text{trans}} = \frac{5}{2} k_B + k_B \ln \left[ \left( \frac{2\pi M k_B T}{h^2} \right)^{\frac{3}{2}} \frac{k_B T}{p^\theta} \right] \quad (8)$$

$$S_{\text{rot}} = k_B \ln \left[ \left( \frac{8\pi^2 I k_B T}{\sigma h^2} \right) + 1 \right] \quad (9)$$

where  $M$  is the mass of the molecule,  $I$  is the degenerate moment of inertia for a linear molecule,  $\sigma$  is the symmetry number of the molecule.

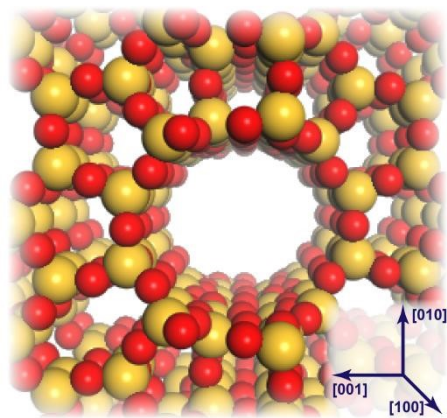

**Fig. 1S.** The unit cell structure of BEA zeolite. Up along the paper is the [010] axis. Perpendicular to the paper facing outwards is the [010] axis. All the other structures are the same orientation. The unit cell is composed of Si and O. O and Si atoms are depicted as red and yellow spheres.

**Table 1S**

Al-O and Si-O bond distances near H atom, O-H bond distances, hydrogen bond distances and O-Al-O angles for the nine Brønsted acid sites of H-BEA zeolite.

| T site | The most stable Brønsted acid sites | $d_{Al-O}$ (Å) | $d_{Si-O}$ (Å) | $d_{O-H}$ (Å) | $d_{O...H}$ (Å) | $\angle_{Al/Si-O-Si}$ (°) |
|--------|-------------------------------------|----------------|----------------|---------------|-----------------|---------------------------|
| Si-BEA | -                                   | -              | 1.60~1.63      | -             | -               | 140~160                   |
| T1     | Al(T1)-OH-Si(T3)                    | 1.901          | 1.704          | 0.977         | -               | 132.378                   |
| T2     | Al(T2)-OH-Si(T4)                    | 1.900          | 1.704          | 0.976         | -               | 131.721                   |
| T7     | Al(T7)-OH-Si(T5)                    | 1.924          | 1.697          | 0.991         | 1.974           | 131.448                   |
| T9     | Al(T9)-OH-Si(T1X)                   | 1.884          | 1.695          | 0.975         | -               | 130.649                   |
| T3     | Al(T3)-OH-Si(T5)                    | 1.936          | 1.699          | 0.994         | 1.968           | 131.902                   |
| T4     | Al(T4)-OH-Si(T6)                    | 1.922          | 1.691          | 1.000         | 1.851           | 130.548                   |
| T5     | Al(T5)-OH-Si(T7)                    | 1.891          | 1.710          | 0.992         | 1.934           | 132.768                   |
| T6     | Al(T6)-OH-Si(T8)                    | 1.891          | 1.708          | 0.996         | 1.856           | 131.842                   |
| T8     | Al(T8)-OH-Si(T6Y)                   | 1.923          | 1.697          | 0.995         | 1.896           | 132.667                   |

Table 2S shows the results of 23 structures in which T sites are occupied by 2 Al. The positions with the lowest substitution energy are listed in the table for the different structures of the same T sites.

**Table 2S**

Substitution energy  $G_{Al-sub}$  at different synthesis temperatures of all possible structures of H-BEA(2).

| T sites occupied<br>by Al | Number of<br>distribution<br>types | $G_{Al-sub}$ (kJ/mol) |       |       |       |       |
|---------------------------|------------------------------------|-----------------------|-------|-------|-------|-------|
|                           |                                    | 323K                  | 373K  | 423K  | 473K  |       |
| T1T1                      | 5                                  | -87.3                 | -80.1 | -77.0 | -70.4 |       |
| T1T2                      | 6                                  | -92.3                 | -84.9 | -81.7 | -75.0 |       |
| T1T7                      | 6                                  | -94.2                 | -86.6 | -83.3 | -76.5 |       |
| T1T9                      | 4                                  | -88.1                 | -80.9 | -77.8 | -71.1 |       |
| T2T2                      | 6                                  | -91.1                 | -83.9 | -80.7 | -74.1 |       |
| T2T7                      | 6                                  | -97.5                 | -90.1 | -86.8 | -80.1 |       |
| T2T9                      | 3                                  | -93.8                 | -86.6 | -83.4 | -76.8 |       |
| T7T7                      | 7                                  | -105.4                | -97.5 | -93.7 | -86.4 |       |
| T7T9                      | 3                                  | -101.1                | -93.6 | -90.1 | -83.2 |       |
| T9T9                      | 3                                  | -88.6                 | -81.2 | -77.9 | -71.1 |       |
| AlSiAl-                   | T1T1                               | 1                     | -68.0 | -60.6 | -57.2 | -50.4 |
|                           | T1T2                               | 1                     | -54.8 | -47.3 | -44.0 | -37.2 |
|                           | T1T7                               | 2                     | -85.9 | -79.3 | -76.7 | -70.6 |
|                           | T1T9                               | 2                     | -77.1 | -70.1 | -67.1 | -60.7 |
|                           | T2T7                               | 1                     | -85.3 | -78.1 | -74.9 | -68.3 |
|                           | T2T9                               | 1                     | -87.3 | -80.2 | -77.2 | -70.7 |
|                           | T7T9                               | 1                     | -97.2 | -89.6 | -86.2 | -79.2 |
|                           | T9T9                               | 1                     | -46.1 | -39.5 | -37.0 | -31.1 |
| AlAl-                     | T1T1                               | 1                     | -27.8 | -21.0 | -18.3 | -12.1 |
|                           | T1T9                               | 2                     | -37.4 | -30.0 | -26.6 | -19.8 |
|                           | T2T2                               | 1                     | -41.6 | -34.2 | -31.0 | -24.3 |
|                           | T2T7                               | 1                     | -62.4 | -54.8 | -51.3 | -44.4 |
|                           | T7T7                               | 1                     | -72.6 | -65.2 | -62.0 | -55.2 |

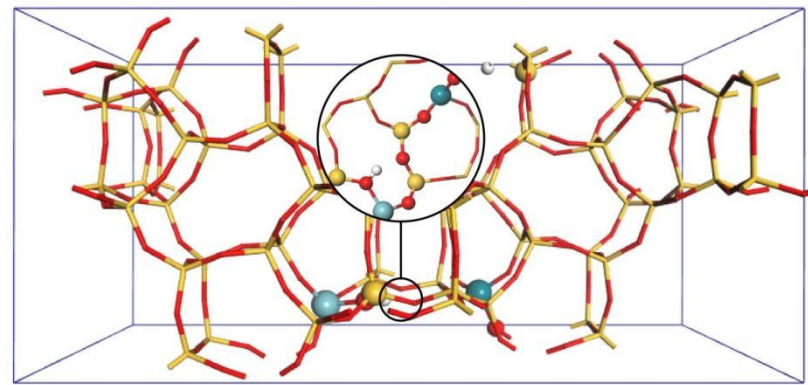

T7T9

(a)

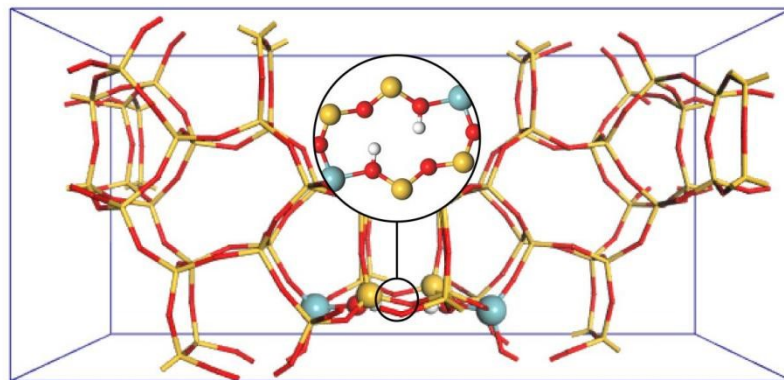

T7T7 in the same 6MR

(b)

**Fig. 2S.** The unit cell of (a) T7T9 and (b) T7T7 in the same 6MR in H-BEA(2). H, O and Si atoms are depicted as white, red and yellow spheres, respectively. The color of T site occupied by Al corresponds to that of Fig. 2.

Table 3S shows the results of 28 structures in which T sites are occupied by 3 Al. The positions with the lowest substitution energy are listed in the table for the different structures of the same T sites.

**Table 3S**

Substitution energy  $G_{Al-sub}$  at different synthesis temperatures of all possible structures of H-BEA(3).

| T sites occupied<br>by Al | Number of<br>distribution<br>types | $G_{Al-sub}$ (kJ/mol) |        |        |        |        |
|---------------------------|------------------------------------|-----------------------|--------|--------|--------|--------|
|                           |                                    | 323K                  | 373K   | 423K   | 473K   |        |
| T1T1T1                    | 3                                  | -119.6                | -110.1 | -100.2 | -90.7  |        |
| T1T1T2                    | 4                                  | -130.1                | -120.6 | -110.8 | -101.3 |        |
| T1T1T7                    | 3                                  | -129.3                | -119.6 | -109.6 | -99.9  |        |
| T1T1T9                    | 1                                  | -111.0                | -101.5 | -91.6  | -82.0  |        |
| T1T2T2                    | 4                                  | -127.8                | -118.3 | -108.5 | -99.0  |        |
| T1T2T7                    | 4                                  | -136.5                | -126.9 | -116.8 | -107.1 |        |
| T1T2T9                    | 4                                  | -136.3                | -126.7 | -116.8 | -107.2 |        |
| T1T7T7                    | 5                                  | -140.8                | -130.6 | -120.0 | -109.7 |        |
| T1T7T9                    | 3                                  | -131.2                | -120.8 | -110.2 | -99.8  |        |
| T1T9T9                    | 1                                  | -111.9                | -102.1 | -91.9  | -82.1  |        |
| T2T2T2                    | 4                                  | -120.3                | -110.5 | -100.3 | -90.4  |        |
| T2T2T7                    | 4                                  | -137.8                | -127.8 | -117.4 | -107.4 |        |
| T2T2T9                    | 5                                  | -134.0                | -124.1 | -113.9 | -104.0 |        |
| T2T7T7                    | 4                                  | -147.7                | -137.5 | -126.9 | -116.6 |        |
| T2T7T9                    | 4                                  | -142.0                | -132.1 | -121.8 | -111.9 |        |
| T2T9T9                    | 2                                  | -128.4                | -118.4 | -108.0 | -98.0  |        |
| T7T7T7                    | 4                                  | -145.9                | -135.4 | -124.6 | -114.1 |        |
| T7T7T9                    | 3                                  | -145.4                | -135.2 | -125.1 | -115.4 |        |
| T7T9T9                    | 1                                  | -135.4                | -125.4 | -115.5 | -105.4 |        |
| T9T9T9                    | 2                                  | -118.7                | -108.6 | -98.5  | -88.3  |        |
|                           | T1T2T7                             | 3                     | -122.0 | -112.1 | -102.3 | -92.3  |
|                           | T1T7T7                             | 2                     | -120.7 | -110.5 | -100.4 | -90.1  |
|                           | T1T7T9                             | 3                     | -128.1 | -118.1 | -108.1 | -98.1  |
|                           | T2T2T7                             | 1                     | -104.6 | -98.1  | -86.5  | -78.3  |
| AlSiAl-                   | T2T7T7                             | 2                     | -97.7  | -87.4  | -77.2  | -66.9  |
|                           | T2T7T9                             | 3                     | -127.7 | -117.7 | -107.8 | -97.8  |
|                           | T7T7T9                             | 6                     | -154.0 | -143.6 | -132.9 | -122.5 |
|                           | T7T9T9                             | 1                     | -139.8 | -129.7 | -119.2 | -109.1 |



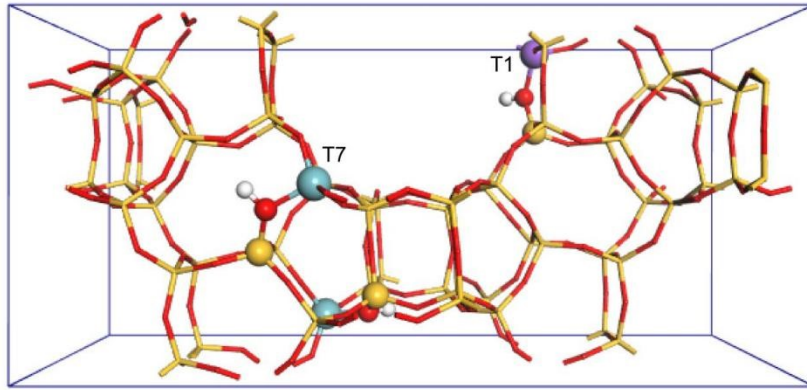

T1T7T7

(a)

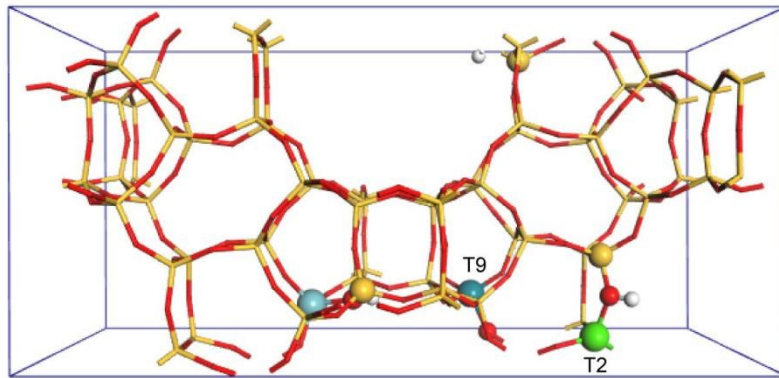

T2T7T9

(b)

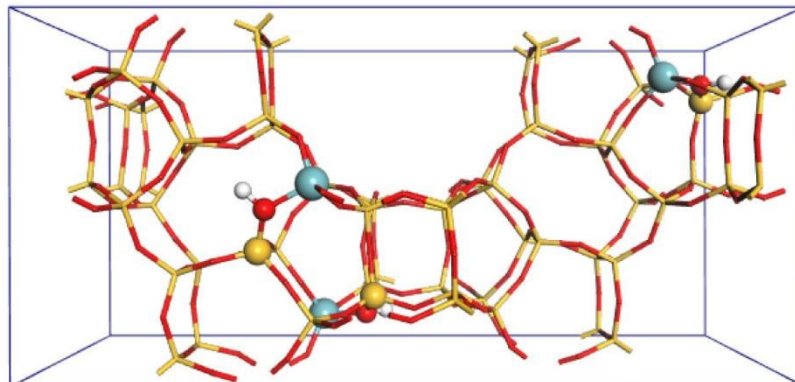

T7T7T7

(c)

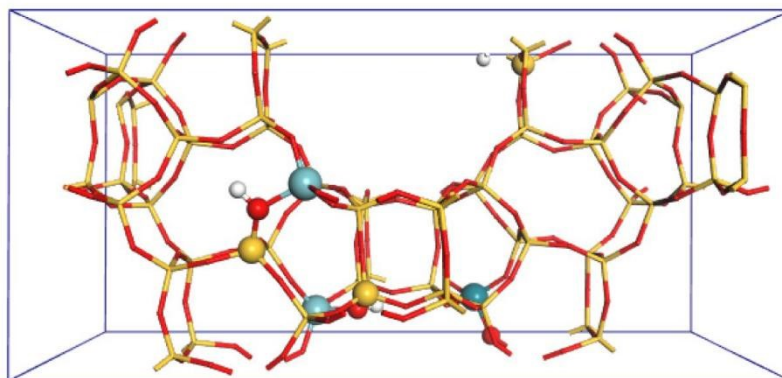

T7T7T9

(d)

**Fig. 3S.** The unit cell of (a) T1T7T7, (b) T2T7T9, (c) T7T7T7 and (d) T7T7T9 in H-BEA(3). H, O and Si atoms are depicted as white, red and yellow spheres, respectively. The color of T site occupied by Al corresponds to that of Fig. 2.

Table 4S shows the results of 43 structures in which T sites are occupied by 4 Al. The positions with the lowest substitution energy are listed in the table for the different structures of the same T sites.

**Table 4S**

Substitution energy  $G_{Al-sub}$  at different synthesis temperatures of all possible structures of H-BEA(4).

| T sites occupied<br>by Al | Number of<br>distribution<br>types | $G_{Al-sub}$ (kJ/mol) |        |        |        |
|---------------------------|------------------------------------|-----------------------|--------|--------|--------|
|                           |                                    | 323K                  | 373K   | 423K   | 473K   |
| T1T1T1T1                  | 1                                  | -161.2                | -148.4 | -135.1 | -122.2 |
| T1T1T1T2                  | 2                                  | -164.5                | -151.7 | -138.4 | -125.6 |
| T1T1T1T7                  | 1                                  | -159.7                | -146.8 | -133.5 | -120.5 |
| T1T1T2T2                  | 2                                  | -158.5                | -145.2 | -131.4 | -118.1 |
| T1T1T2T7                  | 3                                  | -168.9                | -155.9 | -142.5 | -129.5 |
| T1T1T2T9                  | 2                                  | -170.8                | -158.0 | -144.7 | -131.9 |
| T1T1T7T7                  | 3                                  | -169.4                | -155.2 | -140.5 | -126.3 |
| T1T1T7T9                  | 1                                  | -167.7                | -154.7 | -141.2 | -128.1 |
| T1T2T2T2                  | 2                                  | -155.3                | -142.5 | -129.3 | -116.5 |
| T1T2T2T7                  | 2                                  | -170.3                | -157.4 | -144.0 | -131.1 |
| T1T2T2T9                  | 3                                  | -170.2                | -157.8 | -145.1 | -132.7 |
| T1T2T7T7                  | 4                                  | -185.4                | -172.0 | -158.2 | -144.9 |
| T1T2T7T9                  | 3                                  | -175.0                | -161.4 | -147.4 | -133.8 |
| T1T2T9T9                  | 2                                  | -151.1                | -138.1 | -124.7 | -111.6 |
| T1T7T7T7                  | 4                                  | -182.6                | -168.9 | -154.0 | -140.2 |
| T1T7T7T9                  | 3                                  | -178.5                | -164.9 | -150.8 | -137.2 |
| T1T7T9T9                  | 1                                  | -153.1                | -139.7 | -125.9 | -112.4 |
| T2T2T2T2                  | 2                                  | -146.9                | -133.7 | -120.0 | -106.7 |
| T2T2T2T7                  | 2                                  | -163.1                | -149.7 | -136.0 | -122.6 |
| T2T2T2T9                  | 3                                  | -161.6                | -148.5 | -134.8 | -121.6 |
| T2T2T7T7                  | 2                                  | -186.0                | -172.6 | -158.8 | -145.4 |
| T2T2T7T9                  | 3                                  | -178.5                | -165.0 | -150.9 | -137.4 |
| T2T2T9T9                  | 1                                  | -174.2                | -161.2 | -147.6 | -134.6 |
| T2T7T7T7                  | 3                                  | -177.4                | -163.7 | -149.7 | -136.0 |
| T2T7T7T9                  | 2                                  | -189.9                | -176.2 | -162.3 | -148.8 |
| T2T7T9T9                  | 1                                  | -180.4                | -167.2 | -153.5 | -140.2 |
| T2T9T9T9                  | 1                                  | -155.9                | -142.5 | -128.7 | -115.2 |
| T7T7T7T7                  | 2                                  | -188.4                | -173.2 | -157.3 | -141.1 |

|                  |   |        |        |        |        |
|------------------|---|--------|--------|--------|--------|
| T7T7T7T9         | 2 | -189.3 | -175.6 | -161.3 | -147.5 |
| T7T7T9T9         | 2 | -178.6 | -164.9 | -150.7 | -137.0 |
| T7T9T9T9         | 1 | -164.2 | -150.7 | -136.9 | -123.4 |
| T9T9T9T9         | 1 | -147.7 | -134.4 | -120.7 | -107.4 |
| T1T2T7T7         | 3 | -157.0 | -143.5 | -129.5 | -115.9 |
| T1T2T7T9         | 2 | -165.8 | -152.4 | -138.6 | -125.1 |
| T1T7T7T7         | 4 | -164.1 | -150.3 | -136.1 | -122.2 |
| T1T7T7T9         | 3 | -165.5 | -151.9 | -137.8 | -124.2 |
| T2T2T7T7         | 2 | -137.4 | -123.1 | -108.4 | -94.1  |
| AlSiAl- T2T2T7T9 | 2 | -148.9 | -135.4 | -121.6 | -108.1 |
| T2T7T7T7         | 1 | -137.4 | -123.7 | -109.6 | -95.9  |
| T2T7T7T9         | 2 | -189.4 | -175.7 | -161.6 | -147.8 |
| T2T7T9T9         | 1 | -179.8 | -165.2 | -149.8 | -134.7 |
| T7T7T7T9         | 2 | -181.6 | -167.0 | -151.7 | -136.7 |
| T7T7T9T9         | 1 | -188.0 | -174.3 | -160.1 | -146.3 |

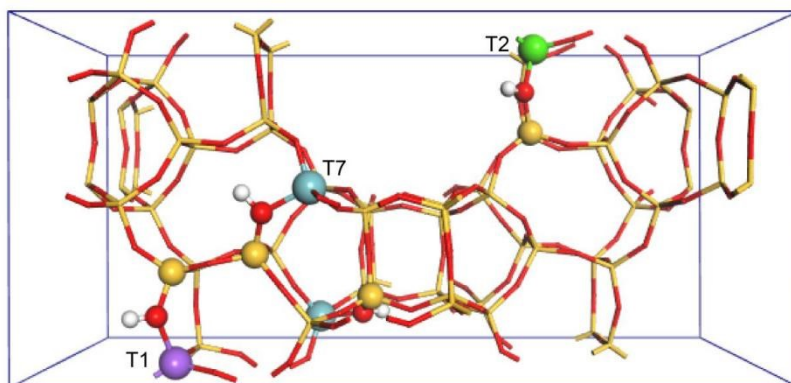

T1T2T7T7

(a)

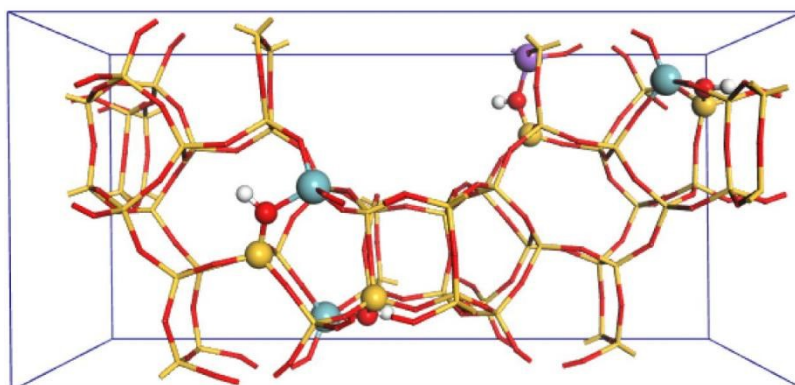

T1T7T7T7

(b)

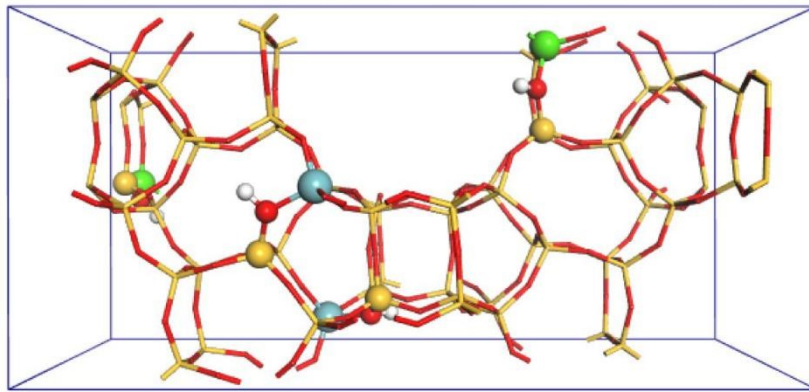

T2T2T7T7

(c)

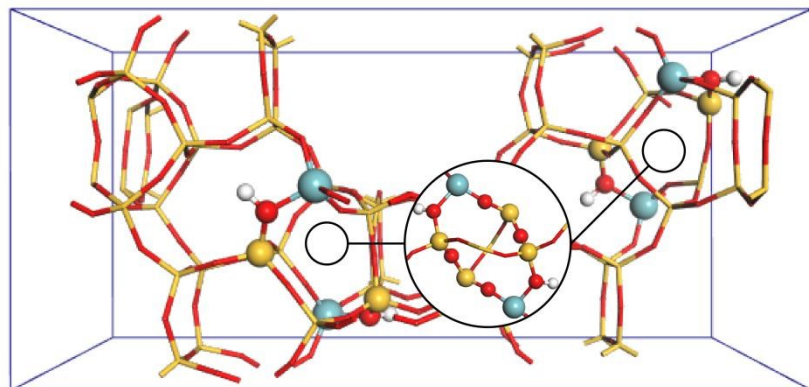

T7T7T7T7

(d)

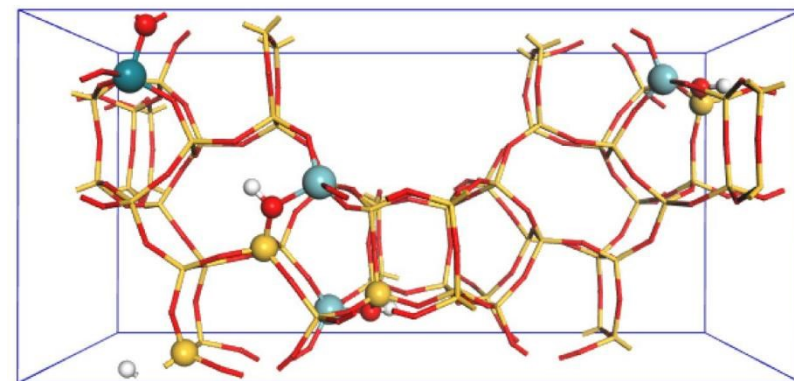

T7T7T7T9

(e)

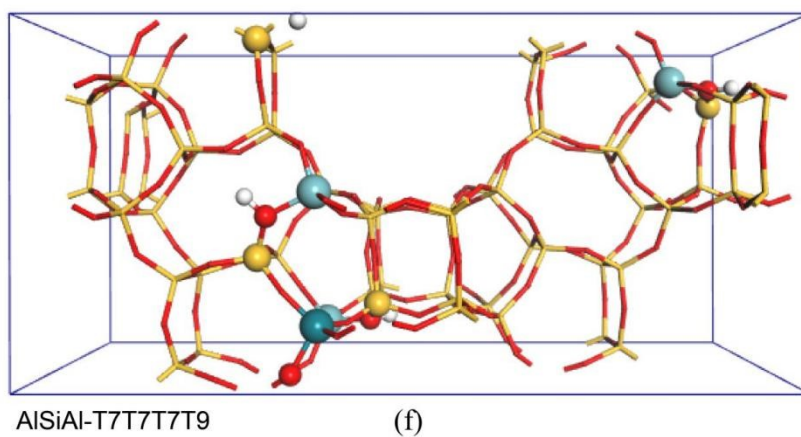

**Fig. 4S.** The unit cell of (a) T1T2T7T7, (b) T1T7T7T7, (c) T2T2T7T7, (d) T7T7T7T7, (e) T7T7T7T9, (f) AlSiAl-T7T7T7T9 and (g) AlSiAl-T7T7T9T9 in H-BEA(4). H, O and Si atoms are depicted as white, red and yellow spheres, respectively. The color of T site occupied by Al corresponds to that of Fig. 2.

Table 5S shows the results of 41 structures in which T sites are occupied by 5 Al. The positions with the lowest substitution energy are listed in the table for the different structures of the same T sites.

**Table 5S**

Substitution energy  $G_{Al-sub}$  at different synthesis temperatures of all possible structures of H-BEA(5).

| T sites occupied<br>by Al | Number of<br>distribution<br>types | $G_{Al-sub}$ (kJ/mol) |        |        |        |
|---------------------------|------------------------------------|-----------------------|--------|--------|--------|
|                           |                                    | 323K                  | 373K   | 423K   | 473K   |
| T1T1T1T2T7                | 1                                  | -200.1                | -184.0 | -167.4 | -151.3 |
| T1T1T1T7T7                | 1                                  | -209.2                | -193.0 | -176.1 | -159.9 |
| T1T1T2T2T7                | 2                                  | -203.5                | -187.3 | -170.6 | -154.4 |
| T1T1T2T2T9                | 1                                  | -195.4                | -179.5 | -163.0 | -147.1 |
| T1T1T2T7T7                | 1                                  | -205.8                | -189.5 | -172.5 | -156.2 |
| T1T1T7T7T7                | 1                                  | -207.3                | -190.8 | -173.8 | -157.3 |
| T1T2T2T2T7                | 2                                  | -194.8                | -178.7 | -162.0 | -145.8 |
| T1T2T2T2T9                | 1                                  | -190.6                | -174.7 | -158.3 | -142.3 |
| T1T2T2T7T7                | 2                                  | -210.3                | -194.1 | -177.3 | -161.1 |
| T1T2T2T7T9                | 1                                  | -212.2                | -196.1 | -179.4 | -163.2 |
| T1T2T7T7T7                | 2                                  | -208.2                | -191.8 | -174.9 | -158.6 |
| T1T2T7T7T9                | 2                                  | -217.7                | -201.2 | -184.1 | -167.3 |
| T1T7T7T7T7                | 1                                  | -225.5                | -208.3 | -190.5 | -173.3 |
| T1T7T7T7T9                | 2                                  | -225.9                | -208.8 | -191.1 | -173.9 |
| T2T2T2T2T9                | 1                                  | -172.8                | -156.8 | -140.2 | -124.1 |
| T2T2T2T7T9                | 1                                  | -205.0                | -188.9 | -172.1 | -156.0 |
| T2T2T7T7T7                | 2                                  | -205.2                | -188.9 | -172.1 | -155.8 |
| T2T2T7T7T9                | 1                                  | -225.1                | -208.6 | -191.7 | -175.3 |
| T2T2T7T9T9                | 1                                  | -210.3                | -193.9 | -177.1 | -160.8 |
| T2T2T9T9T9                | 1                                  | -184.2                | -168.0 | -151.4 | -135.4 |
| T2T7T7T7T7                | 2                                  | -196.5                | -179.7 | -162.5 | -145.9 |
| T2T7T7T7T9                | 2                                  | -228.0                | -211.0 | -193.4 | -176.4 |
| T2T7T7T9T9                | 1                                  | -227.3                | -210.6 | -193.4 | -176.8 |
| T7T7T7T7T9                | 2                                  | -229.5                | -212.1 | -194.0 | -176.6 |
| T7T7T7T9T9                | 1                                  | -226.2                | -208.9 | -191.0 | -173.6 |
| T7T7T9T9T9                | 1                                  | -211.8                | -195.1 | -177.8 | -161.0 |
| T1T1T1T7T7                | 2                                  | -197.1                | -180.4 | -163.1 | -146.3 |
| AlSiAl- T1T1T2T7T7        | 2                                  | -184.4                | -167.8 | -150.6 | -133.9 |
| T1T1T7T7T7                | 2                                  | -197.8                | -181.2 | -164.0 | -147.4 |

|            |   |        |        |        |        |
|------------|---|--------|--------|--------|--------|
| T1T1T7T7T9 | 1 | -226.1 | -209.2 | -191.8 | -174.9 |
| T1T2T2T7T7 | 3 | -199.0 | -182.4 | -165.2 | -148.6 |
| T1T2T7T7T9 | 3 | -204.2 | -187.6 | -170.4 | -153.7 |
| T1T7T7T7T7 | 4 | -212.3 | -195.6 | -178.3 | -161.6 |
| T1T7T7T7T9 | 3 | -219.0 | -202.0 | -184.3 | -167.3 |
| T2T2T7T7T7 | 2 | -179.0 | -162.0 | -144.4 | -127.4 |
| T2T2T7T7T9 | 3 | -193.0 | -176.2 | -158.9 | -142.1 |
| T2T7T7T7T7 | 4 | -194.2 | -177.1 | -159.5 | -142.4 |
| T2T7T7T7T9 | 5 | -202.8 | -185.9 | -168.3 | -151.4 |
| T2T7T7T9T9 | 2 | -233.9 | -217.0 | -199.6 | -182.7 |
| T7T7T7T7T9 | 2 | -239.5 | -222.0 | -203.9 | -186.4 |
| T7T7T7T9T9 | 2 | -222.9 | -205.5 | -187.6 | -170.3 |

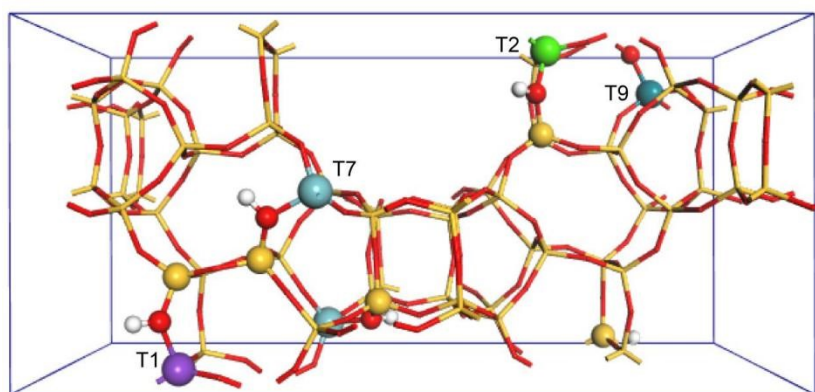

T1T2T7T7T9

(a)

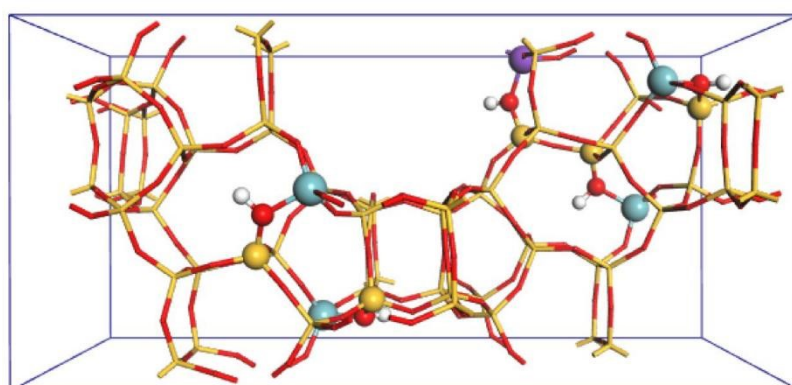

T1T7T7T7T7

(b)



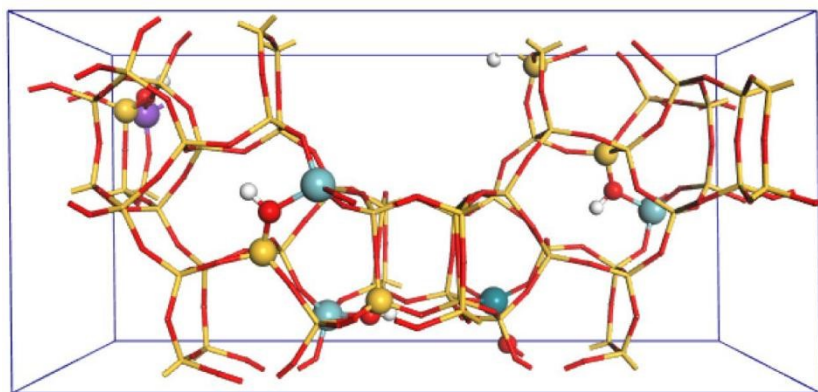

T1T7T7T9

(c)

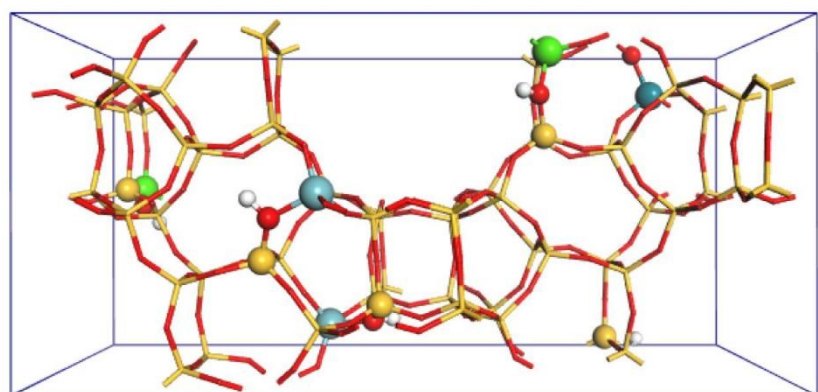

T2T2T7T9

(d)

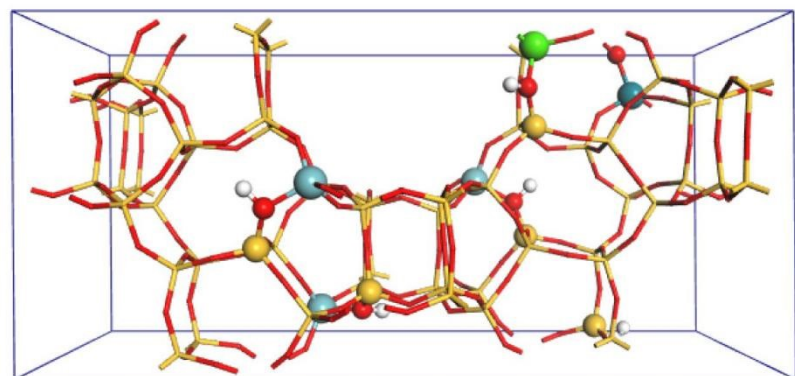

T2T7T7T9

(e)

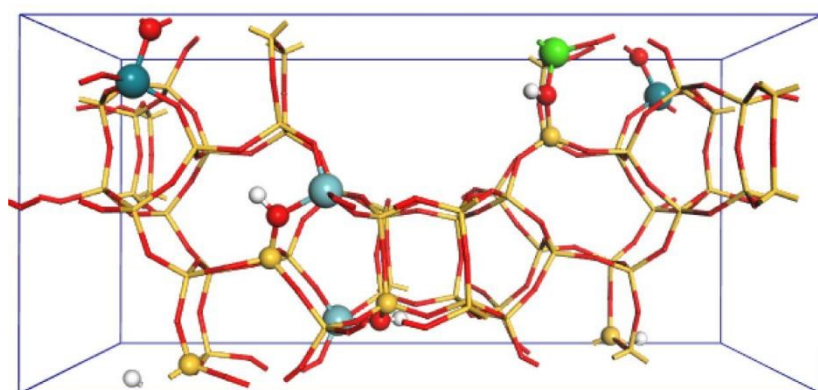

T2T7T7T9T9

(f)

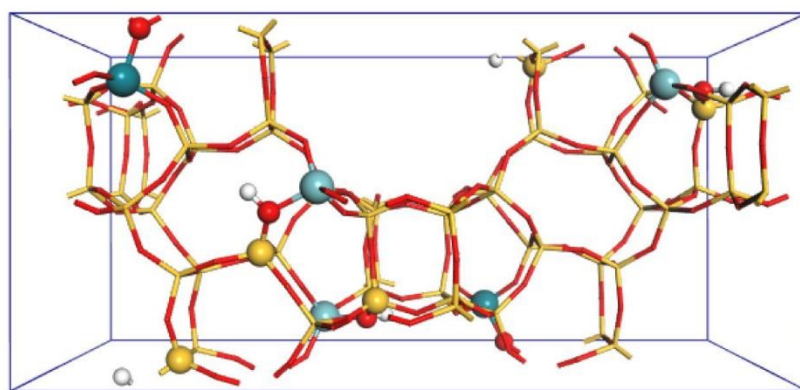

T7T7T7T9T9

(g)

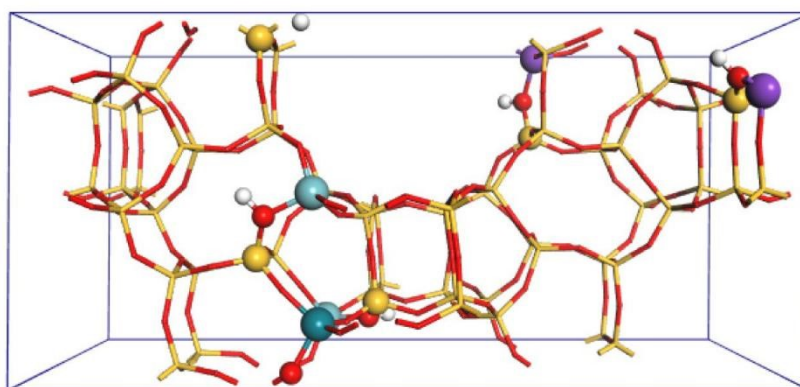

AlSiAl-T1T1T7T7T9

(h)

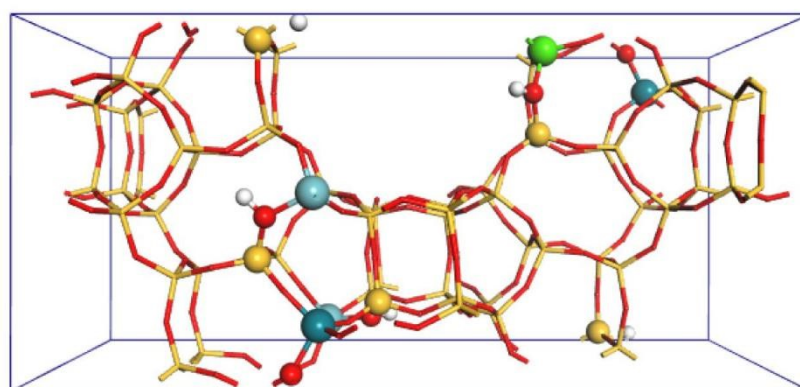

AlSiAl-T2T7T7T9T9

(i)

**Fig. 5S.** The unit cell of (a) T1T2T7T7T9, (b) T1T7T7T7T7, (c) T1T7T7T7T9, (d) T2T2T7T7T9, (e) T2T7T7T7T9, (f) T2T7T7T9T9, (g) T7T7T7T9T9, (h) AlSiAl-T1T1T7T7T9 and (i) AlSiAl-T2T7T7T9T9 in H-BEA(5). H, O and Si atoms are depicted as white, red and yellow spheres, respectively. The color of T site occupied by Al corresponds to that of Fig. 2.

Table 6S shows the results of 33 structures in which T sites are occupied by 6 Al. The positions with the lowest substitution energy are listed in the table for the different structures of the same T sites.

**Table 6S**

Substitution energy  $G_{Al-sub}$  at different synthesis temperatures of all possible structures of H-BEA(6).

| T sites occupied by Al | Number of distribution types | $G_{Al-sub}$ (kJ/mol) |        |        |        |
|------------------------|------------------------------|-----------------------|--------|--------|--------|
|                        |                              | 323K                  | 373K   | 423K   | 473K   |
| T1T1T2T2T7T7           | 1                            | -230.9                | -211.3 | -191.0 | -171.4 |
| T1T1T2T2T7T9           | 1                            | -226.0                | -205.3 | -184.8 | -163.3 |
| T1T1T2T7T7T7           | 1                            | -234.2                | -213.6 | -193.0 | -171.4 |
| T1T1T2T7T7T9           | 1                            | -237.6                | -217.0 | -196.5 | -175.0 |
| T1T1T7T7T7T7           | 2                            | -261.6                | -241.3 | -220.2 | -199.9 |
| T1T2T2T2T7T9           | 1                            | -236.5                | -216.7 | -196.3 | -176.5 |
| T1T2T2T7T7T7           | 1                            | -226.6                | -206.7 | -186.0 | -166.1 |
| T1T2T2T7T7T9           | 1                            | -246.4                | -226.5 | -205.8 | -185.8 |
| T1T2T7T7T7T7           | 1                            | -218.5                | -198.2 | -177.3 | -157.1 |
| T1T2T7T7T7T9           | 1                            | -245.8                | -225.5 | -204.6 | -184.4 |
| T1T2T7T7T9T9           | 1                            | -247.7                | -227.7 | -206.9 | -186.8 |
| T1T7T7T7T7T9           | 2                            | -264.6                | -244.0 | -222.7 | -202.0 |
| T2T2T2T7T9T9           | 1                            | -227.0                | -206.9 | -186.1 | -165.9 |
| T2T2T7T7T7T7           | 1                            | -223.7                | -204.3 | -184.2 | -164.7 |
| T2T2T7T7T7T9           | 1                            | -262.4                | -244.9 | -227.1 | -210.3 |
| T2T2T7T7T9T9           | 1                            | -253.1                | -233.0 | -212.3 | -192.2 |
| T2T7T7T7T7T9           | 1                            | -260.5                | -240.4 | -219.7 | -199.6 |
| T2T7T7T7T9T9           | 1                            | -260.7                | -240.6 | -219.8 | -199.7 |
| T7T7T7T7T9T9           | 1                            | -268.3                | -247.4 | -225.8 | -204.8 |
| T1T2T2T7T7T9           | 2                            | -235.5                | -215.6 | -195.1 | -175.3 |
| T1T2T7T7T7T7           | 3                            | -252.6                | -232.5 | -211.8 | -191.7 |
| T1T2T7T7T7T9           | 2                            | -266.7                | -246.4 | -225.4 | -205.0 |
| T1T2T7T7T9T9           | 1                            | -268.1                | -247.3 | -225.8 | -205.0 |
| AlSiAl- T1T7T7T7T7T9   | 2                            | -321.5                | -298.9 | -276.7 | -255.2 |
| T2T2T2T7T7T7           | 1                            | -210.9                | -190.7 | -170.0 | -149.9 |
| T2T2T7T7T7T7           | 2                            | -214.2                | -193.0 | -171.2 | -150.0 |
| T2T2T7T7T7T9           | 2                            | -241.5                | -221.1 | -200.1 | -179.7 |
| T2T2T7T7T9T9           | 4                            | -260.5                | -240.3 | -219.6 | -199.5 |

|              |   |        |        |        |        |
|--------------|---|--------|--------|--------|--------|
| T2T7T7T7T7T9 | 1 | -259.4 | -238.8 | -217.7 | -197.2 |
| T2T7T7T7T9T9 | 3 | -295.9 | -275.3 | -254.2 | -233.8 |
| T2T7T7T9T9T9 | 2 | -288.9 | -268.6 | -247.7 | -227.4 |
| T7T7T7T7T9T9 | 3 | -337.3 | -316.6 | -295.2 | -274.5 |
| T7T7T7T9T9T9 | 2 | -283.0 | -262.5 | -241.3 | -220.8 |

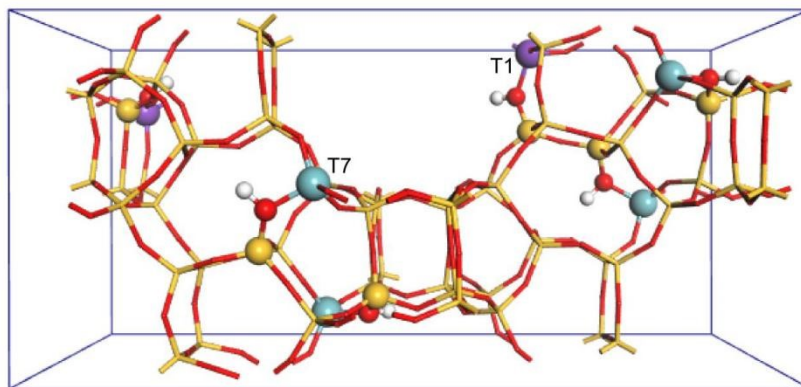

T1T1T7T7T7T7

(a)

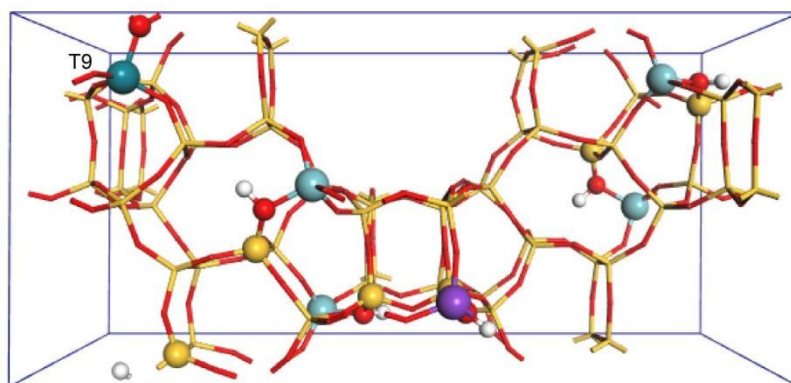

T1T7T7T7T7T9

(b)

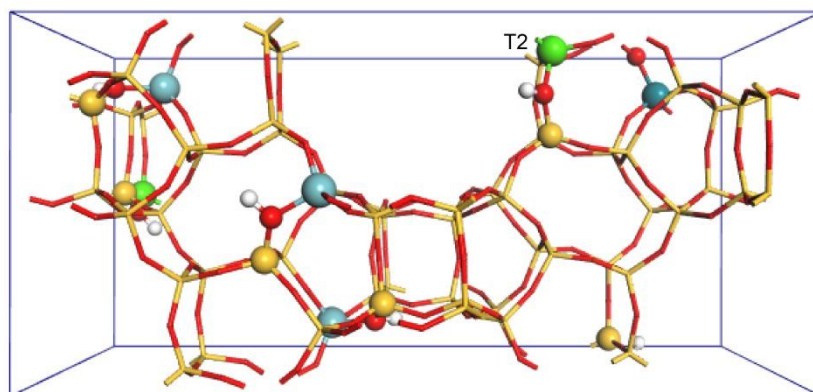

T2T2T7T7T7T9

(c)

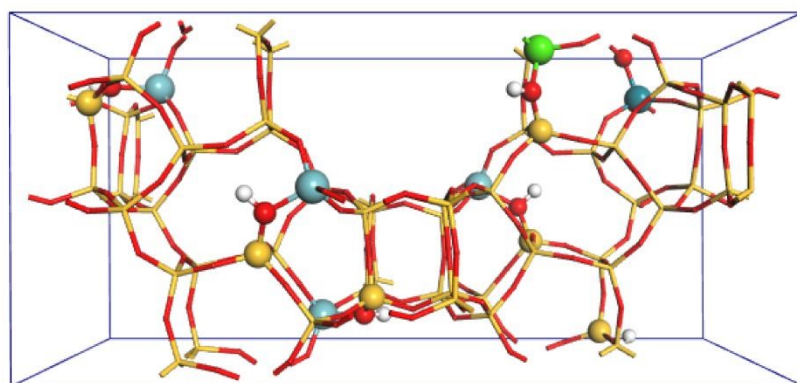

T2T7T7T7T7T9

(d)

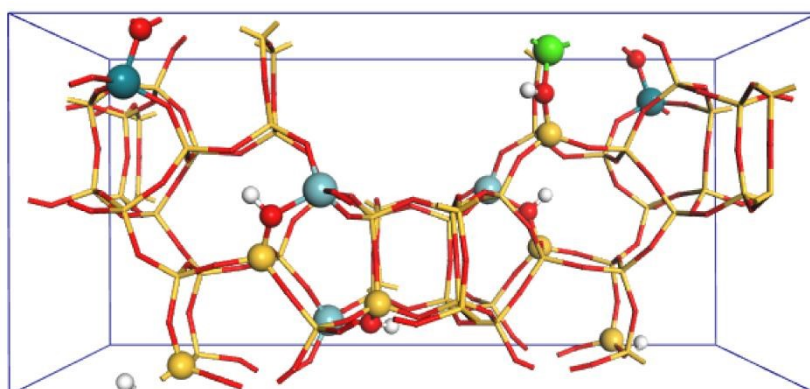

T2T7T7T7T9T9

(e)

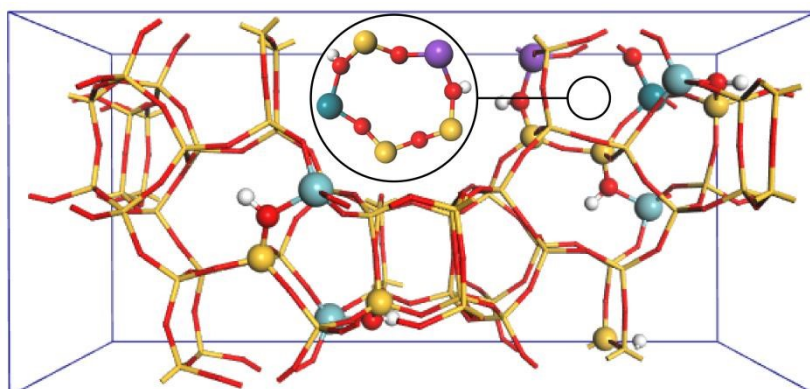

AlSiAl-T1T7T7T7T7T9

(f)

**Fig. 6S.** The unit cell of (a) T1T1T7T7T7T7, (b) T1T7T7T7T7T9, (c) T2T2T7T7T7T9, (d)T2T7T7T7T7T9, (e)T2T7T7T7T9T9 and (f)AlSiAl-T1T7T7T7T7T9 in H-BEA(6). H, O and Si atoms are depicted as white, red and yellow spheres, respectively. The color of T site occupied by Al corresponds to that of Fig. 2.

Table 7S shows the results of 22 structures in which T sites are occupied by 7 Al. The positions with the lowest substitution energy are listed in the table for the different structures of the same T sites.

**Table 7S**

Substitution energy  $G_{Al-sub}$  at different synthesis temperatures of all possible structures of H-BEA(7).

| T sites occupied<br>by Al | Number of<br>distribution<br>types | $G_{Al-sub}$ (kJ/mol) |        |        |        |
|---------------------------|------------------------------------|-----------------------|--------|--------|--------|
|                           |                                    | 323K                  | 373K   | 423K   | 473K   |
| T1T1T2T2T7T7T9            | 1                                  | -268.0                | -245.3 | -221.8 | -199.1 |
| T1T2T2T7T7T7T9            | 1                                  | -275.0                | -252.0 | -228.2 | -205.2 |
| T2T2T7T7T7T7T9            | 1                                  | -295.8                | -272.1 | -247.5 | -223.8 |
| T1T1T1T7T7T7T7            | 2                                  | -270.4                | -246.4 | -221.7 | -197.8 |
| T1T1T2T7T7T7T7            | 2                                  | -258.0                | -234.3 | -209.8 | -186.1 |
| T1T1T2T7T7T7T9            | 4                                  | -289.7                | -266.3 | -242.0 | -218.6 |
| T1T1T7T7T7T7T9            | 3                                  | -330.5                | -306.8 | -282.3 | -258.6 |
| T1T2T2T7T7T7T9            | 1                                  | -261.0                | -237.4 | -213.1 | -189.4 |
| T1T2T2T7T7T9T9            | 2                                  | -278.7                | -255.5 | -231.5 | -208.2 |
| T1T2T7T7T7T7T9            | 5                                  | -314.5                | -290.8 | -266.4 | -242.7 |
| T1T2T7T7T7T9T9            | 4                                  | -320.3                | -296.8 | -272.4 | -248.8 |
| T1T7T7T7T7T9T9            | 11                                 | -365.7                | -342.0 | -317.4 | -293.5 |
| AlSiAl- T2T2T2T7T7T7T9    | 1                                  | -251.5                | -227.6 | -202.9 | -179.0 |
| T2T2T2T7T7T9T9            | 4                                  | -269.2                | -245.8 | -221.5 | -198.0 |
| T2T2T7T7T7T7T9            | 1                                  | -280.7                | -256.7 | -231.8 | -207.7 |
| T2T2T7T7T7T9T9            | 2                                  | -289.8                | -266.3 | -241.9 | -218.3 |
| T2T2T7T7T9T9T9            | 4                                  | -315.3                | -291.8 | -267.5 | -243.9 |
| T2T7T7T7T7T9T9            | 8                                  | -352.6                | -328.7 | -304.0 | -280.1 |
| T2T7T7T7T9T9T9            | 1                                  | -333.8                | -310.1 | -285.6 | -261.8 |
| T2T7T7T9T9T9T9            | 1                                  | -315.4                | -291.9 | -267.6 | -244.0 |
| T7T7T7T7T9T9T9            | 5                                  | -350.8                | -325.7 | -300.1 | -274.7 |
| T7T7T7T9T9T9T9            | 1                                  | -331.0                | -307.2 | -282.7 | -258.8 |

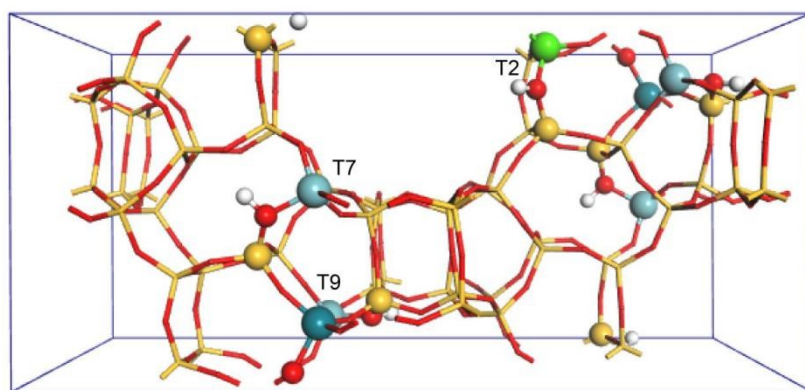

AlSiAl-T2T7T7T7T9T9 (a)

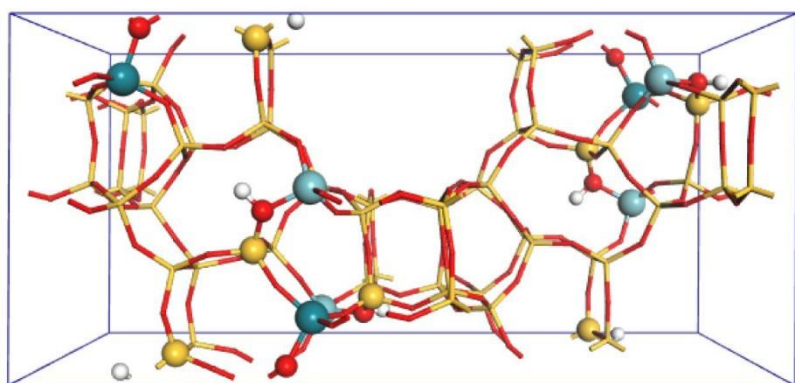

AlSiAl-T7T7T7T9T9T9 (b)

**Fig. 7S.** The unit cell of (a) AlSiAl-T2T7T7T7T9T9 and (b) AlSiAl-T7T7T7T9T9T9 in H-BEA(7). H, O and Si atoms are depicted as white, red and yellow spheres, respectively. The color of T site occupied by Al corresponds to that of Fig. 2.

Table 8S shows the results of 19 structures in which T sites are occupied by 8 Al. The positions with the lowest substitution energy are listed in the table for the different structures of the same T sites.

**Table 8S**

Substitution energy  $G_{Al-sub}$  at different synthesis temperatures of all possible structures of H-BEA (8).

| T sites occupied<br>by Al | Number of<br>distribution<br>types | $G_{Al-sub}$ (kJ/mol) |        |        |        |
|---------------------------|------------------------------------|-----------------------|--------|--------|--------|
|                           |                                    | 323K                  | 373K   | 423K   | 473K   |
| T1T1T1T7T7T7T7T9          | 2                                  | -362.9                | -336.2 | -308.6 | -281.9 |
| T1T1T2T2T7T7T7T9          | 2                                  | -308.1                | -281.7 | -254.3 | -227.8 |
| T1T1T2T2T7T7T9T9          | 1                                  | -345.3                | -318.9 | -291.5 | -265.1 |
| T1T1T2T7T7T7T7T9          | 2                                  | -354.6                | -327.8 | -300.1 | -273.3 |
| T1T1T2T7T7T7T9T9          | 1                                  | -332.1                | -304.6 | -276.3 | -248.8 |
| T1T1T7T7T7T7T9T9          | 6                                  | -408.8                | -381.9 | -354.1 | -327.2 |
| T1T2T2T7T7T7T7T9          | 2                                  | -350.0                | -323.2 | -295.3 | -268.4 |
| T1T2T2T7T7T7T9T9          | 3                                  | -342.3                | -315.4 | -287.6 | -260.7 |
| T1T2T7T7T7T7T9T9          | 3                                  | -394.4                | -367.5 | -339.6 | -312.6 |
| AlSiAl- T1T2T7T7T7T9T9T9  | 1                                  | -348.9                | -322.1 | -294.4 | -267.5 |
| T1T7T7T7T7T9T9T9          | 1                                  | -390.2                | -363.1 | -335.1 | -308.0 |
| T2T2T2T7T7T9T9T9          | 3                                  | -327.0                | -300.3 | -272.7 | -245.9 |
| T2T2T7T7T7T7T7T9          | 2                                  | -326.0                | -298.9 | -270.9 | -243.7 |
| T2T2T7T7T7T7T9T9          | 6                                  | -383.1                | -356.1 | -328.1 | -301.0 |
| T2T2T7T7T7T9T9T9          | 2                                  | -347.2                | -319.6 | -291.1 | -263.4 |
| T2T2T7T7T9T9T9T9          | 1                                  | -346.1                | -318.3 | -289.7 | -261.8 |
| T2T7T7T7T7T9T9T9          | 2                                  | -391.8                | -364.6 | -336.0 | -309.4 |
| T2T7T7T7T9T9T9T9          | 1                                  | -373.8                | -346.8 | -318.9 | -291.9 |
| T7T7T7T7T9T9T9T9          | 1                                  | -382.4                | -355.2 | -327.1 | -299.8 |



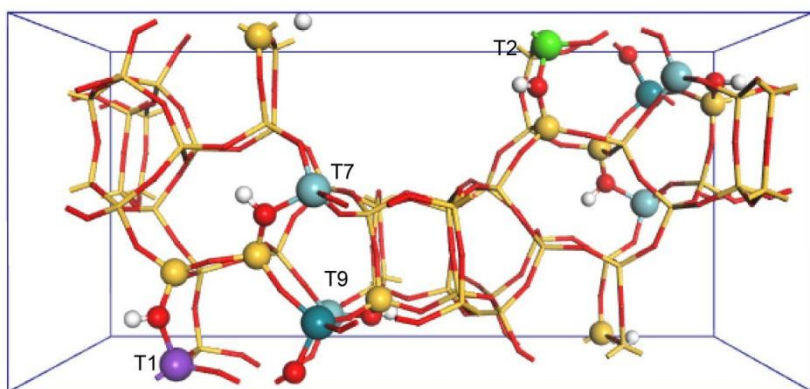

AlSiAl-T1T2T7T7T7T9T9 (a)

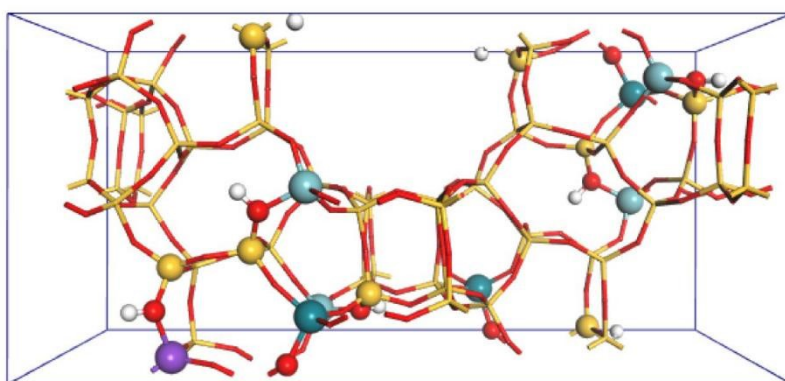

AlSiAl-T1T7T7T7T9T9T9 (b)

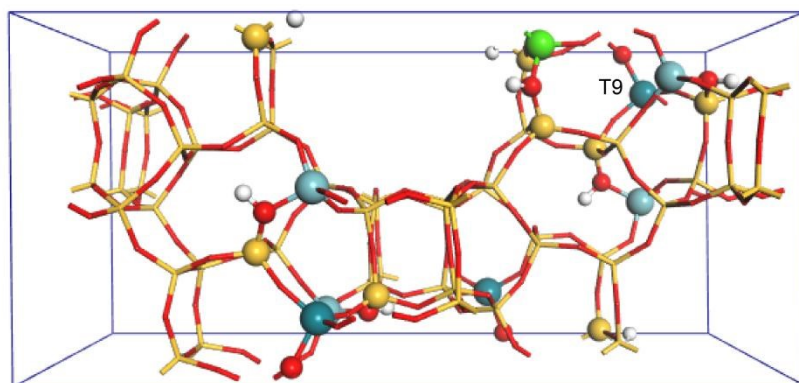

AlSiAl-T2T7T7T7T9T9T9 (c)

**Fig. 8S.** The unit cell of (a) AlSiAl-T1T2T7T7T7T9T9, (b) AlSiAl-T1T7T7T7T9T9T9, (c) AlSiAl-T2T7T7T7T9T9T9 in H-BEA(8). H, O and Si atoms are depicted as white, red and yellow spheres, respectively. The color of T site occupied by Al corresponds to that of Fig. 2.

**Table 9S**Substitution energy  $G_{Al-sub}$  at different synthesis temperatures of H-BEA(n).

| Number of Al atoms in<br>H-BEA(n) | $G_{Al-sub}$ (kJ/mol) |        |        |        |        |
|-----------------------------------|-----------------------|--------|--------|--------|--------|
|                                   | 323K                  | 373K   | 423K   | 473K   |        |
| Normal<br>Structure               | 1                     | -66.1  | -62.7  | -59.2  | -55.8  |
|                                   | 2                     | -103.3 | -95.5  | -91.9  | -84.8  |
|                                   | 3                     | -144.3 | -135.0 | -124.6 | -114.5 |
|                                   | 4                     | -186.9 | -173.1 | -159.6 | -146.7 |
|                                   | 5                     | -226.8 | -209.8 | -192.2 | -175.1 |
|                                   | 6                     | -263.0 | -243.1 | -222.6 | -202.7 |
|                                   | 7                     | -295.8 | -272.1 | -247.5 | -223.8 |
| AlSiAl<br>Structure               | 2                     | -97.2  | -89.6  | -86.2  | -79.2  |
|                                   | 3                     | -154.0 | -143.6 | -132.9 | -122.5 |
|                                   | 4                     | -186.3 | -172.3 | -160.9 | -147.1 |
|                                   | 5                     | -236.7 | -219.5 | -201.8 | -184.6 |
|                                   | 6                     | -329.4 | -316.6 | -295.2 | -274.5 |
|                                   | 7                     | -356.4 | -332.1 | -310.7 | -286.8 |
|                                   | 8                     | -396.3 | -369.3 | -346.9 | -319.9 |

**Table 10S**Average substitution energy  $\overline{G}_{Al-sub}$  at different synthesis temperatures of H-BEA(n).

| Number of Al atoms  | $\overline{G}_{Al-sub}$ (kJ/mol) |       |       |       |       |
|---------------------|----------------------------------|-------|-------|-------|-------|
|                     | 323K                             | 373K  | 423K  | 473K  |       |
| Normal<br>Structure | 1                                | -66.1 | -62.7 | -59.2 | -55.8 |
|                     | 2                                | -51.6 | -47.8 | -45.9 | -42.4 |
|                     | 3                                | -48.1 | -45.0 | -41.5 | -38.2 |
|                     | 4                                | -46.7 | -43.3 | -39.9 | -36.7 |
|                     | 5                                | -45.4 | -42.0 | -38.4 | -35.0 |
|                     | 6                                | -43.8 | -40.5 | -37.1 | -33.8 |
|                     | 7                                | -42.3 | -38.9 | -35.4 | -32.0 |
| AlSiAl<br>Structure | 2                                | -48.6 | -44.8 | -43.1 | -39.6 |
|                     | 3                                | -51.3 | -47.9 | -44.3 | -40.8 |
|                     | 4                                | -46.6 | -43.1 | -40.2 | -36.8 |
|                     | 5                                | -47.3 | -43.9 | -40.4 | -36.9 |
|                     | 6                                | -54.9 | -52.8 | -49.2 | -45.8 |
|                     | 7                                | -50.9 | -47.4 | -44.4 | -41.0 |
|                     | 8                                | -49.5 | -46.2 | -43.4 | -40.0 |

Table 11S shows the substitution energy of silanol nests with different silanol orientations and the most stable orientation after the dealuminization of Al atoms.

**Table 11S**

The substitution energies of RAl-BEA after silanol nests formation at different dealuminization sites. T1T2T3T9 represents that in silanol nest, the silanol of T1 site forms hydrogen bond with O atom of T2 site, the silanol of T2 site forms hydrogen bond with T3 site, the silanol of T3 site forms hydrogen bond with T9 site, and the silanol of T9 site forms hydrogen bond with T1 site.

| Dealuminated<br>T site | Silanol nests<br>orientation | $G_{RAI-sub}$ (kJ/mol) |        |        |        |
|------------------------|------------------------------|------------------------|--------|--------|--------|
|                        |                              | 373K                   | 473K   | 573K   | 673K   |
| T1                     | T1T2T3T9                     | -311.5                 | -295.8 | -278.5 | -259.8 |
|                        | T1T2T9T3                     | -316.0                 | -300.9 | -283.9 | -265.4 |
|                        | T1T3T2T9                     | -309.8                 | -293.9 | -276.5 | -257.7 |
|                        | T1T3T9T2                     | -301.9                 | -285.2 | -267.3 | -248.1 |
|                        | T1T9T2T3                     | -298.9                 | -283.4 | -266.3 | -247.6 |
|                        | T1T9T3T2                     | -297.2                 | -282.2 | -265.3 | -246.9 |
|                        | T1T2T4T7                     | -308.7                 | -293.2 | -276.0 | -257.4 |
| T2                     | T1T2T7T4                     | -292.4                 | -277.6 | -260.8 | -242.4 |
|                        | T1T4T2T7                     | -299.5                 | -284.6 | -267.9 | -249.5 |
|                        | T1T4T7T2                     | -299.4                 | -285.9 | -270.0 | -252.2 |
|                        | T1T7T2T4                     | -297.6                 | -283.4 | -267.0 | -248.8 |
|                        | T1T7T4T2                     | -294.7                 | -280.1 | -263.4 | -245.1 |
| T7                     | T2T3T5T6                     | -301.0                 | -286.7 | -268.4 | -250.2 |
|                        | T2T3T6T5                     | -317.8                 | -307.4 | -296.1 | -283.8 |
|                        | T2T5T3T6                     | -294.3                 | -280.0 | -263.5 | -245.3 |
|                        | T2T5T6T3                     | -314.6                 | -299.5 | -282.6 | -264.1 |
|                        | T2T6T3T5                     | -299.5                 | -284.1 | -267.0 | -248.3 |
|                        | T2T6T5T3                     | -297.5                 | -283.2 | -266.7 | -248.5 |
|                        | T1XT1YT5XT5Y                 | -321.2                 | -311.2 | -300.1 | -288.0 |
| T9                     | T1XT1YT5YT5X                 | -303.2                 | -293.1 | -283.8 | -271.7 |
|                        | T1XT5XT1YT5Y                 | -312.1                 | -303.3 | -293.0 | -281.5 |
|                        | T1XT1YT5YT5X                 | -319.1                 | -308.2 | -296.6 | -284.2 |
|                        | T1XT5YT1YT5X                 | -312.4                 | -302.8 | -291.1 | -278.7 |
|                        | T1XT5YT5XT1Y                 | -322.0                 | -312.0 | -300.9 | -288.9 |

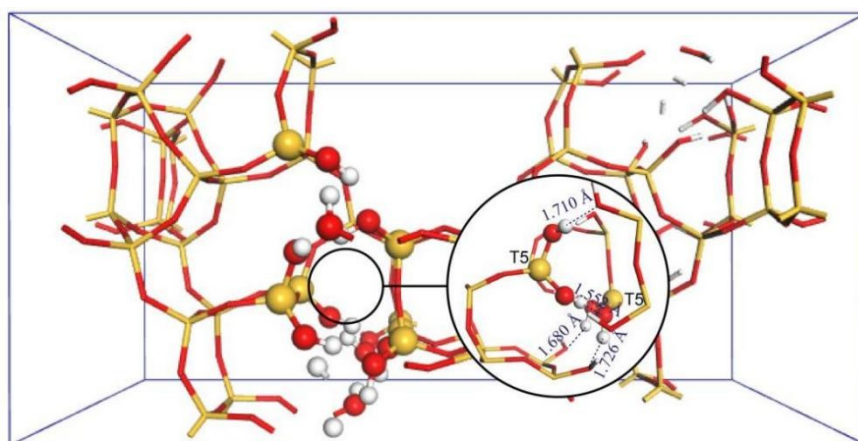

RAI-AISiAl-T7T7T7T7T9T9 (a)

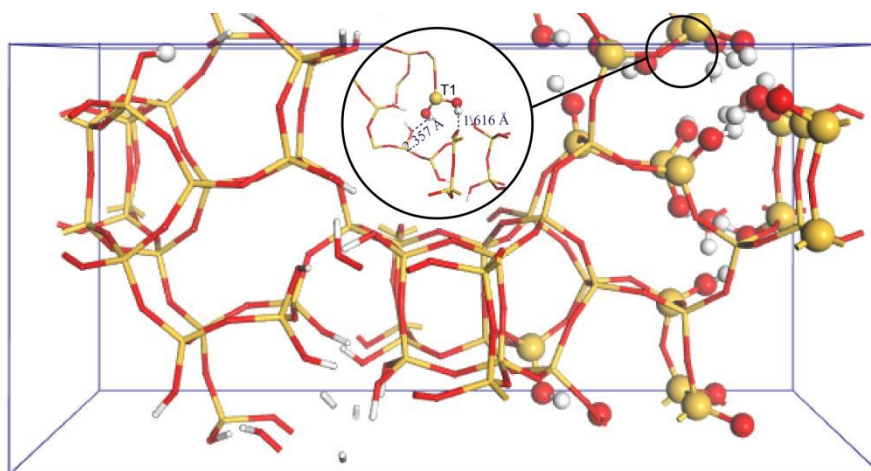

RAI-AISiAl-T1T1T7T7T7T7T9T9 (b)

**Fig. 9S.** The dealuminized cells of (a)AISiAl-T7T7T7T7T9T9 and (b)AISiAl-T1T1T7T7T7T7T9T9. H, O and Si atoms are depicted as white, red and yellow spheres and sticks, respectively.

## References

- [1] La Iglesia A, Aznar A. A method of estimating the Gibbs energies of formation of zeolites. *Zeolites* 1986;6(1):26-9.
- [2] Bonelli B, Onida B, Fubini B, Arean CO, Garrone E. Vibrational and thermodynamic study of the adsorption of carbon dioxide on the zeolite Na<sup>-</sup> ZSM-5. *Langmuir* 2000;16(11):4976-83.
- [3] Nguyen CM, Reyniers M-F, Marin GB. Adsorption thermodynamics of C1–C4 alcohols in H-FAU, H-MOR, H-ZSM-5, and H-ZSM-22. *J Catal* 2015;322:91-103.

## CIF data

T7:

data\_image0

\_chemical\_formula\_structural Si63AlO128H  
\_chemical\_formula\_sum "Si63 Al1 O128 H1"  
\_cell\_length\_a 12.5348  
\_cell\_length\_b 12.5806  
\_cell\_length\_c 26.4552  
\_cell\_angle\_alpha 90.0812  
\_cell\_angle\_beta 90.1547  
\_cell\_angle\_gamma 90.2217

\_space\_group\_name\_H-M\_alt "P 1"  
\_space\_group\_IT\_number 1

loop\_

\_space\_group\_symop\_operation\_xyz  
'x, y, z'

loop\_

\_atom\_site\_type\_symbol  
\_atom\_site\_label  
\_atom\_site\_symmetry\_multiplicity  
\_atom\_site\_fract\_x  
\_atom\_site\_fract\_y  
\_atom\_site\_fract\_z  
\_atom\_site\_occupancy  
Si Si1 1.0 0.33262 0.78618 0.05798 1.0000  
Si Si2 1.0 0.33734 0.53343 0.05428 1.0000  
Si Si3 1.0 0.70799 0.79880 0.05478 1.0000  
Si Si4 1.0 0.71324 0.54527 0.06182 1.0000  
Si Si5 1.0 0.95291 0.80421 0.05316 1.0000  
Si Si6 1.0 0.95821 0.54731 0.05654 1.0000  
Si Si7 1.0 0.52982 0.85720 0.12685 1.0000

|    |      |     |         |         |         |        |
|----|------|-----|---------|---------|---------|--------|
| Si | Si8  | 1.0 | 0.66275 | 0.19887 | 0.54956 | 1.0000 |
| Si | Si9  | 1.0 | 0.66632 | 0.45475 | 0.55907 | 1.0000 |
| Si | Si10 | 1.0 | 0.27397 | 0.20635 | 0.56211 | 1.0000 |
| Si | Si11 | 1.0 | 0.28518 | 0.46145 | 0.55652 | 1.0000 |
| Si | Si12 | 1.0 | 0.02874 | 0.21290 | 0.55187 | 1.0000 |
| Si | Si13 | 1.0 | 0.04213 | 0.47013 | 0.55176 | 1.0000 |
| Si | Si14 | 1.0 | 0.20863 | 0.33890 | 0.30671 | 1.0000 |
| Si | Si15 | 1.0 | 0.46152 | 0.34371 | 0.30504 | 1.0000 |
| Si | Si16 | 1.0 | 0.20218 | 0.71219 | 0.30372 | 1.0000 |
| Si | Si17 | 1.0 | 0.45864 | 0.71595 | 0.30742 | 1.0000 |
| Si | Si18 | 1.0 | 0.19681 | 0.95371 | 0.30304 | 1.0000 |
| Si | Si19 | 1.0 | 0.45511 | 0.95801 | 0.30726 | 1.0000 |
| Si | Si20 | 1.0 | 0.13484 | 0.52796 | 0.37476 | 1.0000 |
| Si | Si21 | 1.0 | 0.78999 | 0.66329 | 0.80894 | 1.0000 |
| Si | Si22 | 1.0 | 0.53725 | 0.66077 | 0.80539 | 1.0000 |
| Si | Si23 | 1.0 | 0.80141 | 0.28470 | 0.80947 | 1.0000 |
| Si | Si24 | 1.0 | 0.54610 | 0.28407 | 0.80948 | 1.0000 |
| Si | Si25 | 1.0 | 0.80175 | 0.03953 | 0.80489 | 1.0000 |
| Si | Si26 | 1.0 | 0.54493 | 0.03992 | 0.80245 | 1.0000 |
| Si | Si27 | 1.0 | 0.85539 | 0.46741 | 0.87869 | 1.0000 |
| Si | Si28 | 1.0 | 0.67138 | 0.78469 | 0.94063 | 1.0000 |
| Si | Si29 | 1.0 | 0.66596 | 0.52978 | 0.94747 | 1.0000 |
| Si | Si30 | 1.0 | 0.29441 | 0.79262 | 0.94278 | 1.0000 |
| Si | Si31 | 1.0 | 0.28771 | 0.54144 | 0.93928 | 1.0000 |
| Si | Si32 | 1.0 | 0.05096 | 0.80110 | 0.94705 | 1.0000 |
| Si | Si33 | 1.0 | 0.04398 | 0.54379 | 0.94736 | 1.0000 |
| Si | Si34 | 1.0 | 0.47297 | 0.85188 | 0.87052 | 1.0000 |
| Si | Si35 | 1.0 | 0.33348 | 0.20068 | 0.44843 | 1.0000 |
| Si | Si36 | 1.0 | 0.32789 | 0.45428 | 0.44312 | 1.0000 |
| Si | Si37 | 1.0 | 0.71239 | 0.21356 | 0.43520 | 1.0000 |
| Si | Si38 | 1.0 | 0.70573 | 0.46539 | 0.44426 | 1.0000 |
| Si | Si39 | 1.0 | 0.95925 | 0.21718 | 0.44027 | 1.0000 |
| Si | Si40 | 1.0 | 0.95465 | 0.47048 | 0.44387 | 1.0000 |
| Si | Si41 | 1.0 | 0.51905 | 0.14556 | 0.37598 | 1.0000 |

|    |      |     |         |         |         |        |
|----|------|-----|---------|---------|---------|--------|
| Si | Si42 | 1.0 | 0.79602 | 0.33933 | 0.69566 | 1.0000 |
| Si | Si43 | 1.0 | 0.54445 | 0.34175 | 0.69528 | 1.0000 |
| Si | Si44 | 1.0 | 0.79780 | 0.70931 | 0.69459 | 1.0000 |
| Si | Si45 | 1.0 | 0.54386 | 0.70812 | 0.69229 | 1.0000 |
| Si | Si46 | 1.0 | 0.80327 | 0.95171 | 0.69651 | 1.0000 |
| Si | Si47 | 1.0 | 0.54459 | 0.95204 | 0.69371 | 1.0000 |
| Si | Si48 | 1.0 | 0.86711 | 0.52392 | 0.62711 | 1.0000 |
| Si | Si49 | 1.0 | 0.21240 | 0.66837 | 0.19099 | 1.0000 |
| Si | Si50 | 1.0 | 0.46581 | 0.66726 | 0.19469 | 1.0000 |
| Si | Si51 | 1.0 | 0.20366 | 0.28673 | 0.19216 | 1.0000 |
| Si | Si52 | 1.0 | 0.45987 | 0.28629 | 0.19151 | 1.0000 |
| Si | Si53 | 1.0 | 0.20357 | 0.04193 | 0.19470 | 1.0000 |
| Si | Si54 | 1.0 | 0.46083 | 0.04263 | 0.19836 | 1.0000 |
| Si | Si55 | 1.0 | 0.14892 | 0.47026 | 0.12243 | 1.0000 |
| Si | Si56 | 1.0 | 0.13695 | 0.85818 | 0.12211 | 1.0000 |
| Si | Si57 | 1.0 | 0.52606 | 0.47111 | 0.12575 | 1.0000 |
| Si | Si58 | 1.0 | 0.84236 | 0.13741 | 0.62525 | 1.0000 |
| Si | Si59 | 1.0 | 0.46814 | 0.52402 | 0.62705 | 1.0000 |
| Si | Si60 | 1.0 | 0.15162 | 0.13694 | 0.37565 | 1.0000 |
| Si | Si61 | 1.0 | 0.52609 | 0.52803 | 0.37476 | 1.0000 |
| Si | Si62 | 1.0 | 0.86862 | 0.85471 | 0.87545 | 1.0000 |
| Si | Si63 | 1.0 | 0.47442 | 0.46668 | 0.87644 | 1.0000 |
| Al | Al1  | 1.0 | 0.46601 | 0.13766 | 0.62713 | 1.0000 |
| O  | O1   | 1.0 | 0.32691 | 0.65887 | 0.06946 | 1.0000 |
| O  | O2   | 1.0 | 0.34968 | 0.80708 | 0.99816 | 1.0000 |
| O  | O3   | 1.0 | 0.22138 | 0.83981 | 0.07623 | 1.0000 |
| O  | O4   | 1.0 | 0.43101 | 0.84008 | 0.08807 | 1.0000 |
| O  | O5   | 1.0 | 0.34315 | 0.51808 | 0.99377 | 1.0000 |
| O  | O6   | 1.0 | 0.23381 | 0.46979 | 0.07591 | 1.0000 |
| O  | O7   | 1.0 | 0.44630 | 0.48583 | 0.07787 | 1.0000 |
| O  | O8   | 1.0 | 0.70369 | 0.67310 | 0.06824 | 1.0000 |
| O  | O9   | 1.0 | 0.82985 | 0.84124 | 0.05672 | 1.0000 |
| O  | O10  | 1.0 | 0.64107 | 0.86503 | 0.09630 | 1.0000 |
| O  | O11  | 1.0 | 0.83663 | 0.50788 | 0.06596 | 1.0000 |



|   |     |     |         |         |         |        |
|---|-----|-----|---------|---------|---------|--------|
| O | O12 | 1.0 | 0.64790 | 0.49050 | 0.10770 | 1.0000 |
| O | O13 | 1.0 | 0.96428 | 0.67605 | 0.05778 | 1.0000 |
| O | O14 | 1.0 | 0.01684 | 0.85955 | 0.09955 | 1.0000 |
| O | O15 | 1.0 | 0.03115 | 0.49951 | 0.10170 | 1.0000 |
| O | O16 | 1.0 | 0.67415 | 0.32465 | 0.56003 | 1.0000 |
| O | O17 | 1.0 | 0.67757 | 0.16801 | 0.49076 | 1.0000 |
| O | O18 | 1.0 | 0.74157 | 0.13236 | 0.58540 | 1.0000 |
| O | O19 | 1.0 | 0.53678 | 0.15884 | 0.56348 | 1.0000 |
| O | O20 | 1.0 | 0.66549 | 0.49442 | 0.50079 | 1.0000 |
| O | O21 | 1.0 | 0.76964 | 0.50333 | 0.58744 | 1.0000 |
| O | O22 | 1.0 | 0.55665 | 0.49239 | 0.58465 | 1.0000 |
| O | O23 | 1.0 | 0.28060 | 0.33486 | 0.56682 | 1.0000 |
| O | O24 | 1.0 | 0.14967 | 0.16887 | 0.55835 | 1.0000 |
| O | O25 | 1.0 | 0.33546 | 0.15057 | 0.60751 | 1.0000 |
| O | O26 | 1.0 | 0.16514 | 0.50782 | 0.55556 | 1.0000 |
| O | O27 | 1.0 | 0.35118 | 0.52039 | 0.60083 | 1.0000 |
| O | O28 | 1.0 | 0.02848 | 0.34168 | 0.55461 | 1.0000 |
| O | O29 | 1.0 | 0.95193 | 0.16598 | 0.59567 | 1.0000 |
| O | O30 | 1.0 | 0.98001 | 0.52469 | 0.59802 | 1.0000 |
| O | O31 | 1.0 | 0.33481 | 0.37001 | 0.31070 | 1.0000 |
| O | O32 | 1.0 | 0.17174 | 0.33104 | 0.24802 | 1.0000 |
| O | O33 | 1.0 | 0.18806 | 0.22523 | 0.33423 | 1.0000 |
| O | O34 | 1.0 | 0.14018 | 0.43160 | 0.33378 | 1.0000 |
| O | O35 | 1.0 | 0.49479 | 0.33434 | 0.24623 | 1.0000 |
| O | O36 | 1.0 | 0.48659 | 0.23169 | 0.33314 | 1.0000 |
| O | O37 | 1.0 | 0.53032 | 0.44057 | 0.32935 | 1.0000 |
| O | O38 | 1.0 | 0.33015 | 0.71355 | 0.31060 | 1.0000 |
| O | O39 | 1.0 | 0.15572 | 0.83196 | 0.30833 | 1.0000 |
| O | O40 | 1.0 | 0.15044 | 0.64197 | 0.34813 | 1.0000 |
| O | O41 | 1.0 | 0.49988 | 0.83784 | 0.31329 | 1.0000 |
| O | O42 | 1.0 | 0.50587 | 0.64647 | 0.35349 | 1.0000 |
| O | O43 | 1.0 | 0.32586 | 0.95993 | 0.30731 | 1.0000 |
| O | O44 | 1.0 | 0.14407 | 0.02177 | 0.34856 | 1.0000 |
| O | O45 | 1.0 | 0.49829 | 0.02663 | 0.35501 | 1.0000 |

|   |     |     |         |         |         |        |
|---|-----|-----|---------|---------|---------|--------|
| O | O46 | 1.0 | 0.66311 | 0.68683 | 0.81612 | 1.0000 |
| O | O47 | 1.0 | 0.81995 | 0.65559 | 0.74950 | 1.0000 |
| O | O48 | 1.0 | 0.85707 | 0.76077 | 0.83358 | 1.0000 |
| O | O49 | 1.0 | 0.82120 | 0.55188 | 0.83528 | 1.0000 |
| O | O50 | 1.0 | 0.51629 | 0.64814 | 0.74524 | 1.0000 |
| O | O51 | 1.0 | 0.46744 | 0.75877 | 0.82771 | 1.0000 |
| O | O52 | 1.0 | 0.50210 | 0.55065 | 0.83188 | 1.0000 |
| O | O53 | 1.0 | 0.67396 | 0.29746 | 0.81784 | 1.0000 |
| O | O54 | 1.0 | 0.83716 | 0.16174 | 0.81432 | 1.0000 |
| O | O55 | 1.0 | 0.86435 | 0.35075 | 0.85302 | 1.0000 |
| O | O56 | 1.0 | 0.51073 | 0.16095 | 0.81461 | 1.0000 |
| O | O57 | 1.0 | 0.48566 | 0.34755 | 0.85425 | 1.0000 |
| O | O58 | 1.0 | 0.67329 | 0.02562 | 0.80718 | 1.0000 |
| O | O59 | 1.0 | 0.85542 | 0.96979 | 0.84939 | 1.0000 |
| O | O60 | 1.0 | 0.48834 | 0.96658 | 0.84470 | 1.0000 |
| O | O61 | 1.0 | 0.68167 | 0.65603 | 0.93582 | 1.0000 |
| O | O62 | 1.0 | 0.65550 | 0.81858 | 0.99937 | 1.0000 |
| O | O63 | 1.0 | 0.78066 | 0.83838 | 0.91995 | 1.0000 |
| O | O64 | 1.0 | 0.56961 | 0.82691 | 0.90952 | 1.0000 |
| O | O65 | 1.0 | 0.66260 | 0.50859 | 0.00791 | 1.0000 |
| O | O66 | 1.0 | 0.76641 | 0.46616 | 0.92344 | 1.0000 |
| O | O67 | 1.0 | 0.55457 | 0.48670 | 0.92402 | 1.0000 |
| O | O68 | 1.0 | 0.29356 | 0.66776 | 0.92715 | 1.0000 |
| O | O69 | 1.0 | 0.17420 | 0.83909 | 0.94355 | 1.0000 |
| O | O70 | 1.0 | 0.36164 | 0.85814 | 0.90127 | 1.0000 |
| O | O71 | 1.0 | 0.16472 | 0.50089 | 0.93941 | 1.0000 |
| O | O72 | 1.0 | 0.35218 | 0.47855 | 0.89571 | 1.0000 |
| O | O73 | 1.0 | 0.04179 | 0.67247 | 0.94542 | 1.0000 |
| O | O74 | 1.0 | 0.98736 | 0.85161 | 0.89964 | 1.0000 |
| O | O75 | 1.0 | 0.97113 | 0.49658 | 0.90213 | 1.0000 |
| O | O76 | 1.0 | 0.31173 | 0.32589 | 0.43760 | 1.0000 |
| O | O77 | 1.0 | 0.33853 | 0.17500 | 0.50897 | 1.0000 |
| O | O78 | 1.0 | 0.23920 | 0.13229 | 0.42146 | 1.0000 |
| O | O79 | 1.0 | 0.44992 | 0.16613 | 0.42731 | 1.0000 |

|   |      |     |         |         |         |        |
|---|------|-----|---------|---------|---------|--------|
| O | O80  | 1.0 | 0.34189 | 0.48522 | 0.50223 | 1.0000 |
| O | O81  | 1.0 | 0.22371 | 0.51125 | 0.41907 | 1.0000 |
| O | O82  | 1.0 | 0.43448 | 0.49249 | 0.41442 | 1.0000 |
| O | O83  | 1.0 | 0.68583 | 0.33942 | 0.43361 | 1.0000 |
| O | O84  | 1.0 | 0.83688 | 0.18940 | 0.42500 | 1.0000 |
| O | O85  | 1.0 | 0.64429 | 0.15429 | 0.39135 | 1.0000 |
| O | O86  | 1.0 | 0.82961 | 0.49527 | 0.43696 | 1.0000 |
| O | O87  | 1.0 | 0.63998 | 0.53396 | 0.40339 | 1.0000 |
| O | O88  | 1.0 | 0.97983 | 0.34433 | 0.43875 | 1.0000 |
| O | O89  | 1.0 | 0.03505 | 0.16156 | 0.39879 | 1.0000 |
| O | O90  | 1.0 | 0.01694 | 0.53228 | 0.39933 | 1.0000 |
| O | O91  | 1.0 | 0.67146 | 0.37380 | 0.69111 | 1.0000 |
| O | O92  | 1.0 | 0.83355 | 0.33031 | 0.75409 | 1.0000 |
| O | O93  | 1.0 | 0.81589 | 0.22535 | 0.66810 | 1.0000 |
| O | O94  | 1.0 | 0.86882 | 0.43032 | 0.66928 | 1.0000 |
| O | O95  | 1.0 | 0.51228 | 0.32997 | 0.75455 | 1.0000 |
| O | O96  | 1.0 | 0.52259 | 0.23547 | 0.66364 | 1.0000 |
| O | O97  | 1.0 | 0.47484 | 0.44127 | 0.67377 | 1.0000 |
| O | O98  | 1.0 | 0.67139 | 0.70631 | 0.68214 | 1.0000 |
| O | O99  | 1.0 | 0.84438 | 0.82977 | 0.69181 | 1.0000 |
| O | O100 | 1.0 | 0.85859 | 0.64034 | 0.65218 | 1.0000 |
| O | O101 | 1.0 | 0.50252 | 0.82929 | 0.69415 | 1.0000 |
| O | O102 | 1.0 | 0.48552 | 0.64496 | 0.64644 | 1.0000 |
| O | O103 | 1.0 | 0.67475 | 0.95479 | 0.69349 | 1.0000 |
| O | O104 | 1.0 | 0.85491 | 0.02109 | 0.65058 | 1.0000 |
| O | O105 | 1.0 | 0.49817 | 0.01169 | 0.64532 | 1.0000 |
| O | O106 | 1.0 | 0.33954 | 0.69630 | 0.18899 | 1.0000 |
| O | O107 | 1.0 | 0.17229 | 0.66015 | 0.24920 | 1.0000 |
| O | O108 | 1.0 | 0.14777 | 0.76313 | 0.16337 | 1.0000 |
| O | O109 | 1.0 | 0.18891 | 0.55471 | 0.16494 | 1.0000 |
| O | O110 | 1.0 | 0.49826 | 0.66497 | 0.25417 | 1.0000 |
| O | O111 | 1.0 | 0.53521 | 0.75840 | 0.16645 | 1.0000 |
| O | O112 | 1.0 | 0.49149 | 0.55156 | 0.17104 | 1.0000 |
| O | O113 | 1.0 | 0.33171 | 0.29733 | 0.18443 | 1.0000 |

|   |      |     |         |         |         |        |
|---|------|-----|---------|---------|---------|--------|
| O | O114 | 1.0 | 0.16670 | 0.16383 | 0.18643 | 1.0000 |
| O | O115 | 1.0 | 0.14257 | 0.35396 | 0.14874 | 1.0000 |
| O | O116 | 1.0 | 0.49730 | 0.16373 | 0.18736 | 1.0000 |
| O | O117 | 1.0 | 0.51958 | 0.35058 | 0.14694 | 1.0000 |
| O | O118 | 1.0 | 0.33234 | 0.03124 | 0.19438 | 1.0000 |
| O | O119 | 1.0 | 0.15545 | 0.97248 | 0.14865 | 1.0000 |
| O | O120 | 1.0 | 0.51691 | 0.96835 | 0.15663 | 1.0000 |
| O | O121 | 1.0 | 0.00113 | 0.84444 | 0.99969 | 1.0000 |
| O | O122 | 1.0 | 0.99964 | 0.50407 | 0.00204 | 1.0000 |
| O | O123 | 1.0 | 0.98296 | 0.17365 | 0.49706 | 1.0000 |
| O | O124 | 1.0 | 0.99304 | 0.51289 | 0.49876 | 1.0000 |
| O | O125 | 1.0 | 0.15827 | 0.00015 | 0.24871 | 1.0000 |
| O | O126 | 1.0 | 0.49941 | 0.00878 | 0.25487 | 1.0000 |
| O | O127 | 1.0 | 0.84481 | 0.00075 | 0.75000 | 1.0000 |
| O | O128 | 1.0 | 0.50471 | 0.00776 | 0.74622 | 1.0000 |
| H | H1   | 1.0 | 0.48470 | 0.15587 | 0.53526 | 1.0000 |

T7T7:

data\_image0

\_chemical\_formula\_structural H2O128Al2Si62  
\_chemical\_formula\_sum "H2 O128 Al2 Si62"  
\_cell\_length\_a 12.5747  
\_cell\_length\_b 12.5366  
\_cell\_length\_c 26.4409  
\_cell\_angle\_alpha 90.2269  
\_cell\_angle\_beta 90.1577  
\_cell\_angle\_gamma 90.4528

\_space\_group\_name\_H-M\_alt "P 1"  
\_space\_group\_IT\_number 1

loop\_

\_space\_group\_symop\_operation\_xyz  
'x, y, z'

loop\_

\_atom\_site\_type\_symbol  
\_atom\_site\_label  
\_atom\_site\_symmetry\_multiplicity  
\_atom\_site\_fract\_x  
\_atom\_site\_fract\_y  
\_atom\_site\_fract\_z  
\_atom\_site\_occupancy  
H H1 1.0 0.48371 0.14385 0.53286 1.0000  
H H2 1.0 0.85422 0.51338 0.71698 1.0000  
O O1 1.0 0.31719 0.65725 0.06735 1.0000  
O O2 1.0 0.34349 0.81185 0.99920 1.0000  
O O3 1.0 0.22581 0.84419 0.08034 1.0000  
O O4 1.0 0.43617 0.82989 0.08685 1.0000  
O O5 1.0 0.33823 0.51085 0.99401 1.0000  
O O6 1.0 0.23453 0.46400 0.07800 1.0000

|   |     |     |         |         |         |        |
|---|-----|-----|---------|---------|---------|--------|
| O | O7  | 1.0 | 0.44553 | 0.48982 | 0.07716 | 1.0000 |
| O | O8  | 1.0 | 0.70074 | 0.67152 | 0.06449 | 1.0000 |
| O | O9  | 1.0 | 0.83249 | 0.83707 | 0.05882 | 1.0000 |
| O | O10 | 1.0 | 0.64313 | 0.86260 | 0.09683 | 1.0000 |
| O | O11 | 1.0 | 0.83528 | 0.50689 | 0.06479 | 1.0000 |
| O | O12 | 1.0 | 0.64706 | 0.48720 | 0.10470 | 1.0000 |
| O | O13 | 1.0 | 0.96776 | 0.67220 | 0.05750 | 1.0000 |
| O | O14 | 1.0 | 0.01980 | 0.85533 | 0.10029 | 1.0000 |
| O | O15 | 1.0 | 0.02969 | 0.49125 | 0.09897 | 1.0000 |
| O | O16 | 1.0 | 0.63755 | 0.32723 | 0.55368 | 1.0000 |
| O | O17 | 1.0 | 0.68467 | 0.16670 | 0.49052 | 1.0000 |
| O | O18 | 1.0 | 0.74031 | 0.15361 | 0.58781 | 1.0000 |
| O | O19 | 1.0 | 0.53772 | 0.14152 | 0.56039 | 1.0000 |
| O | O20 | 1.0 | 0.67564 | 0.50282 | 0.50134 | 1.0000 |
| O | O21 | 1.0 | 0.76999 | 0.47126 | 0.59104 | 1.0000 |
| O | O22 | 1.0 | 0.56129 | 0.51318 | 0.58302 | 1.0000 |
| O | O23 | 1.0 | 0.28231 | 0.33022 | 0.56760 | 1.0000 |
| O | O24 | 1.0 | 0.15402 | 0.15932 | 0.55569 | 1.0000 |
| O | O25 | 1.0 | 0.33610 | 0.14428 | 0.60626 | 1.0000 |
| O | O26 | 1.0 | 0.17071 | 0.50297 | 0.55190 | 1.0000 |
| O | O27 | 1.0 | 0.35361 | 0.51650 | 0.60196 | 1.0000 |
| O | O28 | 1.0 | 0.03836 | 0.33316 | 0.55254 | 1.0000 |
| O | O29 | 1.0 | 0.95447 | 0.15542 | 0.59091 | 1.0000 |
| O | O30 | 1.0 | 0.99538 | 0.50576 | 0.60608 | 1.0000 |
| O | O31 | 1.0 | 0.33925 | 0.37525 | 0.31176 | 1.0000 |
| O | O32 | 1.0 | 0.17390 | 0.33880 | 0.25061 | 1.0000 |
| O | O33 | 1.0 | 0.19857 | 0.22233 | 0.33310 | 1.0000 |
| O | O34 | 1.0 | 0.14447 | 0.42734 | 0.34010 | 1.0000 |
| O | O35 | 1.0 | 0.49569 | 0.33767 | 0.24559 | 1.0000 |
| O | O36 | 1.0 | 0.48800 | 0.23257 | 0.33192 | 1.0000 |
| O | O37 | 1.0 | 0.53670 | 0.44114 | 0.32930 | 1.0000 |
| O | O38 | 1.0 | 0.33403 | 0.71155 | 0.31238 | 1.0000 |
| O | O39 | 1.0 | 0.16052 | 0.82968 | 0.30967 | 1.0000 |
| O | O40 | 1.0 | 0.15446 | 0.63941 | 0.34931 | 1.0000 |

|   |     |     |         |         |         |        |
|---|-----|-----|---------|---------|---------|--------|
| O | O41 | 1.0 | 0.50297 | 0.83709 | 0.31226 | 1.0000 |
| O | O42 | 1.0 | 0.51143 | 0.64683 | 0.35409 | 1.0000 |
| O | O43 | 1.0 | 0.32958 | 0.96015 | 0.30796 | 1.0000 |
| O | O44 | 1.0 | 0.14769 | 0.02053 | 0.34951 | 1.0000 |
| O | O45 | 1.0 | 0.50673 | 0.02759 | 0.35211 | 1.0000 |
| O | O46 | 1.0 | 0.67338 | 0.68181 | 0.81541 | 1.0000 |
| O | O47 | 1.0 | 0.82197 | 0.65387 | 0.74231 | 1.0000 |
| O | O48 | 1.0 | 0.86668 | 0.76004 | 0.82712 | 1.0000 |
| O | O49 | 1.0 | 0.83650 | 0.54773 | 0.82529 | 1.0000 |
| O | O50 | 1.0 | 0.52152 | 0.64651 | 0.74755 | 1.0000 |
| O | O51 | 1.0 | 0.48083 | 0.75961 | 0.83096 | 1.0000 |
| O | O52 | 1.0 | 0.50930 | 0.55142 | 0.83482 | 1.0000 |
| O | O53 | 1.0 | 0.66198 | 0.32046 | 0.81454 | 1.0000 |
| O | O54 | 1.0 | 0.79846 | 0.15833 | 0.82649 | 1.0000 |
| O | O55 | 1.0 | 0.84919 | 0.35043 | 0.85743 | 1.0000 |
| O | O56 | 1.0 | 0.52179 | 0.16128 | 0.81780 | 1.0000 |
| O | O57 | 1.0 | 0.46683 | 0.34799 | 0.84850 | 1.0000 |
| O | O58 | 1.0 | 0.65820 | 0.00037 | 0.80942 | 1.0000 |
| O | O59 | 1.0 | 0.84237 | 0.96369 | 0.85274 | 1.0000 |
| O | O60 | 1.0 | 0.46451 | 0.96928 | 0.84195 | 1.0000 |
| O | O61 | 1.0 | 0.63130 | 0.66027 | 0.93704 | 1.0000 |
| O | O62 | 1.0 | 0.66245 | 0.82627 | 0.99854 | 1.0000 |
| O | O63 | 1.0 | 0.77857 | 0.80723 | 0.91576 | 1.0000 |
| O | O64 | 1.0 | 0.57246 | 0.85516 | 0.90998 | 1.0000 |
| O | O65 | 1.0 | 0.66500 | 0.50535 | 0.00479 | 1.0000 |
| O | O66 | 1.0 | 0.76398 | 0.50149 | 0.91722 | 1.0000 |
| O | O67 | 1.0 | 0.55438 | 0.46483 | 0.92298 | 1.0000 |
| O | O68 | 1.0 | 0.28534 | 0.66631 | 0.93112 | 1.0000 |
| O | O69 | 1.0 | 0.17053 | 0.84090 | 0.94195 | 1.0000 |
| O | O70 | 1.0 | 0.36057 | 0.85112 | 0.90194 | 1.0000 |
| O | O71 | 1.0 | 0.16138 | 0.49589 | 0.93830 | 1.0000 |
| O | O72 | 1.0 | 0.35059 | 0.48380 | 0.89522 | 1.0000 |
| O | O73 | 1.0 | 0.04147 | 0.67070 | 0.94443 | 1.0000 |
| O | O74 | 1.0 | 0.98214 | 0.84973 | 0.89996 | 1.0000 |

|   |      |     |         |         |         |        |
|---|------|-----|---------|---------|---------|--------|
| O | O75  | 1.0 | 0.97052 | 0.49566 | 0.89934 | 1.0000 |
| O | O76  | 1.0 | 0.31749 | 0.32570 | 0.43660 | 1.0000 |
| O | O77  | 1.0 | 0.34392 | 0.17385 | 0.50814 | 1.0000 |
| O | O78  | 1.0 | 0.23762 | 0.13377 | 0.42272 | 1.0000 |
| O | O79  | 1.0 | 0.44998 | 0.16205 | 0.42521 | 1.0000 |
| O | O80  | 1.0 | 0.35352 | 0.47948 | 0.50390 | 1.0000 |
| O | O81  | 1.0 | 0.23703 | 0.51635 | 0.42117 | 1.0000 |
| O | O82  | 1.0 | 0.44523 | 0.49056 | 0.41583 | 1.0000 |
| O | O83  | 1.0 | 0.69539 | 0.34264 | 0.43618 | 1.0000 |
| O | O84  | 1.0 | 0.84016 | 0.18858 | 0.42317 | 1.0000 |
| O | O85  | 1.0 | 0.64588 | 0.16047 | 0.39114 | 1.0000 |
| O | O86  | 1.0 | 0.83666 | 0.50178 | 0.43582 | 1.0000 |
| O | O87  | 1.0 | 0.64799 | 0.53537 | 0.40292 | 1.0000 |
| O | O88  | 1.0 | 0.98011 | 0.34573 | 0.44042 | 1.0000 |
| O | O89  | 1.0 | 0.03739 | 0.16871 | 0.39456 | 1.0000 |
| O | O90  | 1.0 | 0.02970 | 0.53613 | 0.40708 | 1.0000 |
| O | O91  | 1.0 | 0.67248 | 0.35917 | 0.69674 | 1.0000 |
| O | O92  | 1.0 | 0.83478 | 0.30956 | 0.75825 | 1.0000 |
| O | O93  | 1.0 | 0.84415 | 0.25705 | 0.66061 | 1.0000 |
| O | O94  | 1.0 | 0.49932 | 0.31698 | 0.74995 | 1.0000 |
| O | O95  | 1.0 | 0.52660 | 0.23055 | 0.65810 | 1.0000 |
| O | O96  | 1.0 | 0.48681 | 0.43949 | 0.67056 | 1.0000 |
| O | O97  | 1.0 | 0.66798 | 0.71692 | 0.68215 | 1.0000 |
| O | O98  | 1.0 | 0.83896 | 0.84457 | 0.69483 | 1.0000 |
| O | O99  | 1.0 | 0.85395 | 0.66176 | 0.64436 | 1.0000 |
| O | O100 | 1.0 | 0.49811 | 0.83094 | 0.70074 | 1.0000 |
| O | O101 | 1.0 | 0.47994 | 0.64733 | 0.65019 | 1.0000 |
| O | O102 | 1.0 | 0.66735 | 0.96342 | 0.69531 | 1.0000 |
| O | O103 | 1.0 | 0.84547 | 0.04222 | 0.65602 | 1.0000 |
| O | O104 | 1.0 | 0.49201 | 0.00349 | 0.64415 | 1.0000 |
| O | O105 | 1.0 | 0.34065 | 0.69115 | 0.18784 | 1.0000 |
| O | O106 | 1.0 | 0.17732 | 0.65669 | 0.25051 | 1.0000 |
| O | O107 | 1.0 | 0.15154 | 0.77015 | 0.16780 | 1.0000 |
| O | O108 | 1.0 | 0.18007 | 0.55987 | 0.16319 | 1.0000 |



|    |      |     |         |         |         |        |
|----|------|-----|---------|---------|---------|--------|
| O  | O109 | 1.0 | 0.49792 | 0.66110 | 0.25457 | 1.0000 |
| O  | O110 | 1.0 | 0.53506 | 0.76346 | 0.16936 | 1.0000 |
| O  | O111 | 1.0 | 0.49766 | 0.55415 | 0.16968 | 1.0000 |
| O  | O112 | 1.0 | 0.33035 | 0.30090 | 0.18554 | 1.0000 |
| O  | O113 | 1.0 | 0.16692 | 0.16645 | 0.19129 | 1.0000 |
| O  | O114 | 1.0 | 0.13957 | 0.35472 | 0.15171 | 1.0000 |
| O  | O115 | 1.0 | 0.49394 | 0.16513 | 0.18715 | 1.0000 |
| O  | O116 | 1.0 | 0.51630 | 0.35131 | 0.14577 | 1.0000 |
| O  | O117 | 1.0 | 0.33057 | 0.03003 | 0.19287 | 1.0000 |
| O  | O118 | 1.0 | 0.14900 | 0.97840 | 0.14961 | 1.0000 |
| O  | O119 | 1.0 | 0.51360 | 0.97145 | 0.15286 | 1.0000 |
| O  | O120 | 1.0 | 0.00071 | 0.84217 | 0.00004 | 1.0000 |
| O  | O121 | 1.0 | 0.99481 | 0.50107 | 0.99961 | 1.0000 |
| O  | O122 | 1.0 | 0.98957 | 0.16724 | 0.49325 | 1.0000 |
| O  | O123 | 1.0 | 0.98658 | 0.50944 | 0.50515 | 1.0000 |
| O  | O124 | 1.0 | 0.16074 | 0.99708 | 0.24986 | 1.0000 |
| O  | O125 | 1.0 | 0.49914 | 0.00496 | 0.25203 | 1.0000 |
| O  | O126 | 1.0 | 0.83296 | 0.01523 | 0.75422 | 1.0000 |
| O  | O127 | 1.0 | 0.49542 | 0.01917 | 0.74491 | 1.0000 |
| O  | O128 | 1.0 | 0.85733 | 0.45947 | 0.68935 | 1.0000 |
| Al | Al1  | 1.0 | 0.46667 | 0.12977 | 0.62390 | 1.0000 |
| Al | Al2  | 1.0 | 0.86929 | 0.53126 | 0.62605 | 1.0000 |
| Si | Si1  | 1.0 | 0.33087 | 0.78545 | 0.05880 | 1.0000 |
| Si | Si2  | 1.0 | 0.33375 | 0.53099 | 0.05442 | 1.0000 |
| Si | Si3  | 1.0 | 0.70975 | 0.79884 | 0.05429 | 1.0000 |
| Si | Si4  | 1.0 | 0.71247 | 0.54322 | 0.05927 | 1.0000 |
| Si | Si5  | 1.0 | 0.95507 | 0.80076 | 0.05394 | 1.0000 |
| Si | Si6  | 1.0 | 0.95725 | 0.54329 | 0.05502 | 1.0000 |
| Si | Si7  | 1.0 | 0.53099 | 0.85642 | 0.12661 | 1.0000 |
| Si | Si8  | 1.0 | 0.65642 | 0.20143 | 0.54788 | 1.0000 |
| Si | Si9  | 1.0 | 0.66394 | 0.45578 | 0.55843 | 1.0000 |
| Si | Si10 | 1.0 | 0.27632 | 0.20165 | 0.56098 | 1.0000 |
| Si | Si11 | 1.0 | 0.28984 | 0.45713 | 0.55664 | 1.0000 |
| Si | Si12 | 1.0 | 0.03422 | 0.20497 | 0.54856 | 1.0000 |

|    |      |     |         |         |         |        |
|----|------|-----|---------|---------|---------|--------|
| Si | Si13 | 1.0 | 0.04739 | 0.46312 | 0.55516 | 1.0000 |
| Si | Si14 | 1.0 | 0.21381 | 0.34083 | 0.30913 | 1.0000 |
| Si | Si15 | 1.0 | 0.46477 | 0.34621 | 0.30485 | 1.0000 |
| Si | Si16 | 1.0 | 0.20656 | 0.70965 | 0.30516 | 1.0000 |
| Si | Si17 | 1.0 | 0.46191 | 0.71435 | 0.30804 | 1.0000 |
| Si | Si18 | 1.0 | 0.20074 | 0.95212 | 0.30415 | 1.0000 |
| Si | Si19 | 1.0 | 0.45849 | 0.95739 | 0.30579 | 1.0000 |
| Si | Si20 | 1.0 | 0.14310 | 0.52827 | 0.37922 | 1.0000 |
| Si | Si21 | 1.0 | 0.79839 | 0.66186 | 0.80304 | 1.0000 |
| Si | Si22 | 1.0 | 0.54581 | 0.66016 | 0.80735 | 1.0000 |
| Si | Si23 | 1.0 | 0.78540 | 0.28354 | 0.81424 | 1.0000 |
| Si | Si24 | 1.0 | 0.53722 | 0.28657 | 0.80663 | 1.0000 |
| Si | Si25 | 1.0 | 0.78308 | 0.03428 | 0.81025 | 1.0000 |
| Si | Si26 | 1.0 | 0.53495 | 0.03768 | 0.80262 | 1.0000 |
| Si | Si27 | 1.0 | 0.85396 | 0.47440 | 0.87546 | 1.0000 |
| Si | Si28 | 1.0 | 0.66131 | 0.78713 | 0.93993 | 1.0000 |
| Si | Si29 | 1.0 | 0.65399 | 0.53343 | 0.94528 | 1.0000 |
| Si | Si30 | 1.0 | 0.28956 | 0.79243 | 0.94396 | 1.0000 |
| Si | Si31 | 1.0 | 0.28344 | 0.53893 | 0.94003 | 1.0000 |
| Si | Si32 | 1.0 | 0.04845 | 0.79999 | 0.94668 | 1.0000 |
| Si | Si33 | 1.0 | 0.04191 | 0.54147 | 0.94565 | 1.0000 |
| Si | Si34 | 1.0 | 0.47120 | 0.85712 | 0.87140 | 1.0000 |
| Si | Si35 | 1.0 | 0.33618 | 0.19977 | 0.44766 | 1.0000 |
| Si | Si36 | 1.0 | 0.33816 | 0.45369 | 0.44429 | 1.0000 |
| Si | Si37 | 1.0 | 0.71733 | 0.21565 | 0.43522 | 1.0000 |
| Si | Si38 | 1.0 | 0.71393 | 0.47022 | 0.44499 | 1.0000 |
| Si | Si39 | 1.0 | 0.96221 | 0.21785 | 0.43824 | 1.0000 |
| Si | Si40 | 1.0 | 0.95856 | 0.47255 | 0.44793 | 1.0000 |
| Si | Si41 | 1.0 | 0.52227 | 0.14672 | 0.37457 | 1.0000 |
| Si | Si42 | 1.0 | 0.54401 | 0.33390 | 0.69265 | 1.0000 |
| Si | Si43 | 1.0 | 0.79607 | 0.72201 | 0.68943 | 1.0000 |
| Si | Si44 | 1.0 | 0.54202 | 0.71086 | 0.69487 | 1.0000 |
| Si | Si45 | 1.0 | 0.79512 | 0.96593 | 0.69969 | 1.0000 |
| Si | Si46 | 1.0 | 0.53775 | 0.95431 | 0.69503 | 1.0000 |

|    |      |     |         |         |         |        |
|----|------|-----|---------|---------|---------|--------|
| Si | Si47 | 1.0 | 0.21285 | 0.66898 | 0.19184 | 1.0000 |
| Si | Si48 | 1.0 | 0.46724 | 0.66727 | 0.19503 | 1.0000 |
| Si | Si49 | 1.0 | 0.20317 | 0.29026 | 0.19515 | 1.0000 |
| Si | Si50 | 1.0 | 0.45819 | 0.28843 | 0.19138 | 1.0000 |
| Si | Si51 | 1.0 | 0.20255 | 0.04329 | 0.19617 | 1.0000 |
| Si | Si52 | 1.0 | 0.45874 | 0.04255 | 0.19647 | 1.0000 |
| Si | Si53 | 1.0 | 0.14585 | 0.46831 | 0.12277 | 1.0000 |
| Si | Si54 | 1.0 | 0.13785 | 0.86096 | 0.12462 | 1.0000 |
| Si | Si55 | 1.0 | 0.52614 | 0.47170 | 0.12433 | 1.0000 |
| Si | Si56 | 1.0 | 0.84643 | 0.15170 | 0.62384 | 1.0000 |
| Si | Si57 | 1.0 | 0.47159 | 0.52790 | 0.62643 | 1.0000 |
| Si | Si58 | 1.0 | 0.15488 | 0.13791 | 0.37506 | 1.0000 |
| Si | Si59 | 1.0 | 0.53381 | 0.52824 | 0.37521 | 1.0000 |
| Si | Si60 | 1.0 | 0.86562 | 0.84537 | 0.87393 | 1.0000 |
| Si | Si61 | 1.0 | 0.47065 | 0.46354 | 0.87574 | 1.0000 |
| Si | Si62 | 1.0 | 0.79801 | 0.34005 | 0.70147 | 1.0000 |

T7T9:

data\_image0

\_chemical\_formula\_structural H2O128Al2Si62  
\_chemical\_formula\_sum "H2 O128 Al2 Si62"  
\_cell\_length\_a 12.5379  
\_cell\_length\_b 12.5635  
\_cell\_length\_c 26.4815  
\_cell\_angle\_alpha 90.0682  
\_cell\_angle\_beta 90.2064  
\_cell\_angle\_gamma 90.1846

\_space\_group\_name\_H-M\_alt "P 1"  
\_space\_group\_IT\_number 1

loop\_

\_space\_group\_symop\_operation\_xyz  
'x, y, z'

loop\_

\_atom\_site\_type\_symbol  
\_atom\_site\_label  
\_atom\_site\_symmetry\_multiplicity  
\_atom\_site\_fract\_x  
\_atom\_site\_fract\_y  
\_atom\_site\_fract\_z  
\_atom\_site\_occupancy  
H H1 1.0 0.48048 0.15949 0.53755 1.0000  
H H2 1.0 0.06614 0.97576 0.35812 1.0000  
O O1 1.0 0.33116 0.65921 0.06937 1.0000  
O O2 1.0 0.35025 0.80815 0.99800 1.0000  
O O3 1.0 0.22093 0.83740 0.07594 1.0000  
O O4 1.0 0.43013 0.84315 0.08837 1.0000  
O O5 1.0 0.34819 0.52027 0.99302 1.0000  
O O6 1.0 0.23224 0.47148 0.07216 1.0000

|   |     |     |         |         |         |        |
|---|-----|-----|---------|---------|---------|--------|
| O | O7  | 1.0 | 0.44436 | 0.48307 | 0.07948 | 1.0000 |
| O | O8  | 1.0 | 0.70069 | 0.67283 | 0.06782 | 1.0000 |
| O | O9  | 1.0 | 0.83054 | 0.83846 | 0.05813 | 1.0000 |
| O | O10 | 1.0 | 0.64078 | 0.86558 | 0.09634 | 1.0000 |
| O | O11 | 1.0 | 0.83507 | 0.50814 | 0.06542 | 1.0000 |
| O | O12 | 1.0 | 0.64717 | 0.49007 | 0.10760 | 1.0000 |
| O | O13 | 1.0 | 0.96676 | 0.67376 | 0.05842 | 1.0000 |
| O | O14 | 1.0 | 0.01740 | 0.85712 | 0.10075 | 1.0000 |
| O | O15 | 1.0 | 0.02953 | 0.49235 | 0.09957 | 1.0000 |
| O | O16 | 1.0 | 0.67180 | 0.32623 | 0.56021 | 1.0000 |
| O | O17 | 1.0 | 0.66981 | 0.16986 | 0.49073 | 1.0000 |
| O | O18 | 1.0 | 0.74245 | 0.13441 | 0.58413 | 1.0000 |
| O | O19 | 1.0 | 0.53500 | 0.16008 | 0.56516 | 1.0000 |
| O | O20 | 1.0 | 0.66830 | 0.49649 | 0.50090 | 1.0000 |
| O | O21 | 1.0 | 0.76963 | 0.50353 | 0.58801 | 1.0000 |
| O | O22 | 1.0 | 0.55650 | 0.49597 | 0.58389 | 1.0000 |
| O | O23 | 1.0 | 0.27850 | 0.33726 | 0.56718 | 1.0000 |
| O | O24 | 1.0 | 0.15067 | 0.16915 | 0.55859 | 1.0000 |
| O | O25 | 1.0 | 0.33471 | 0.15567 | 0.61039 | 1.0000 |
| O | O26 | 1.0 | 0.16454 | 0.51065 | 0.55425 | 1.0000 |
| O | O27 | 1.0 | 0.35045 | 0.52282 | 0.60041 | 1.0000 |
| O | O28 | 1.0 | 0.03026 | 0.34219 | 0.55495 | 1.0000 |
| O | O29 | 1.0 | 0.95299 | 0.16755 | 0.59686 | 1.0000 |
| O | O30 | 1.0 | 0.98027 | 0.52528 | 0.59789 | 1.0000 |
| O | O31 | 1.0 | 0.33708 | 0.37613 | 0.30847 | 1.0000 |
| O | O32 | 1.0 | 0.17443 | 0.34031 | 0.24558 | 1.0000 |
| O | O33 | 1.0 | 0.19718 | 0.21953 | 0.32735 | 1.0000 |
| O | O34 | 1.0 | 0.14115 | 0.42516 | 0.33474 | 1.0000 |
| O | O35 | 1.0 | 0.49894 | 0.33226 | 0.24645 | 1.0000 |
| O | O36 | 1.0 | 0.48274 | 0.23182 | 0.33362 | 1.0000 |
| O | O37 | 1.0 | 0.53416 | 0.43938 | 0.32925 | 1.0000 |
| O | O38 | 1.0 | 0.32810 | 0.71195 | 0.30776 | 1.0000 |
| O | O39 | 1.0 | 0.15179 | 0.82418 | 0.30424 | 1.0000 |
| O | O40 | 1.0 | 0.14995 | 0.63659 | 0.34676 | 1.0000 |

|   |     |     |         |         |         |        |
|---|-----|-----|---------|---------|---------|--------|
| O | O41 | 1.0 | 0.49425 | 0.83781 | 0.31624 | 1.0000 |
| O | O42 | 1.0 | 0.50015 | 0.64359 | 0.35366 | 1.0000 |
| O | O43 | 1.0 | 0.32016 | 0.96042 | 0.30980 | 1.0000 |
| O | O44 | 1.0 | 0.49205 | 0.02832 | 0.35743 | 1.0000 |
| O | O45 | 1.0 | 0.66382 | 0.68920 | 0.81692 | 1.0000 |
| O | O46 | 1.0 | 0.81884 | 0.65682 | 0.74951 | 1.0000 |
| O | O47 | 1.0 | 0.85916 | 0.76009 | 0.83404 | 1.0000 |
| O | O48 | 1.0 | 0.82050 | 0.55180 | 0.83490 | 1.0000 |
| O | O49 | 1.0 | 0.51837 | 0.64787 | 0.74560 | 1.0000 |
| O | O50 | 1.0 | 0.46776 | 0.76030 | 0.82754 | 1.0000 |
| O | O51 | 1.0 | 0.50314 | 0.55197 | 0.83211 | 1.0000 |
| O | O52 | 1.0 | 0.67395 | 0.29905 | 0.81814 | 1.0000 |
| O | O53 | 1.0 | 0.83625 | 0.16221 | 0.81443 | 1.0000 |
| O | O54 | 1.0 | 0.86458 | 0.35108 | 0.85306 | 1.0000 |
| O | O55 | 1.0 | 0.51110 | 0.16225 | 0.81368 | 1.0000 |
| O | O56 | 1.0 | 0.48498 | 0.34809 | 0.85412 | 1.0000 |
| O | O57 | 1.0 | 0.67307 | 0.02551 | 0.80697 | 1.0000 |
| O | O58 | 1.0 | 0.85604 | 0.96971 | 0.84847 | 1.0000 |
| O | O59 | 1.0 | 0.48891 | 0.96826 | 0.84544 | 1.0000 |
| O | O60 | 1.0 | 0.68181 | 0.65681 | 0.93676 | 1.0000 |
| O | O61 | 1.0 | 0.65730 | 0.82099 | 0.99943 | 1.0000 |
| O | O62 | 1.0 | 0.77845 | 0.83997 | 0.91893 | 1.0000 |
| O | O63 | 1.0 | 0.56699 | 0.82634 | 0.91053 | 1.0000 |
| O | O64 | 1.0 | 0.66126 | 0.50741 | 0.00772 | 1.0000 |
| O | O65 | 1.0 | 0.76857 | 0.46803 | 0.92370 | 1.0000 |
| O | O66 | 1.0 | 0.55581 | 0.48637 | 0.92355 | 1.0000 |
| O | O67 | 1.0 | 0.29191 | 0.66912 | 0.92717 | 1.0000 |
| O | O68 | 1.0 | 0.17372 | 0.84098 | 0.94427 | 1.0000 |
| O | O69 | 1.0 | 0.36025 | 0.85936 | 0.90088 | 1.0000 |
| O | O70 | 1.0 | 0.16591 | 0.50112 | 0.94066 | 1.0000 |
| O | O71 | 1.0 | 0.35254 | 0.48035 | 0.89535 | 1.0000 |
| O | O72 | 1.0 | 0.04290 | 0.67316 | 0.94533 | 1.0000 |
| O | O73 | 1.0 | 0.98593 | 0.85347 | 0.90095 | 1.0000 |
| O | O74 | 1.0 | 0.97312 | 0.49798 | 0.90074 | 1.0000 |

|   |      |     |         |         |         |        |
|---|------|-----|---------|---------|---------|--------|
| O | O75  | 1.0 | 0.30716 | 0.32330 | 0.44010 | 1.0000 |
| O | O76  | 1.0 | 0.34374 | 0.17609 | 0.51201 | 1.0000 |
| O | O77  | 1.0 | 0.24774 | 0.12404 | 0.42400 | 1.0000 |
| O | O78  | 1.0 | 0.45492 | 0.17285 | 0.42990 | 1.0000 |
| O | O79  | 1.0 | 0.34283 | 0.48627 | 0.50220 | 1.0000 |
| O | O80  | 1.0 | 0.22604 | 0.51092 | 0.41868 | 1.0000 |
| O | O81  | 1.0 | 0.43542 | 0.48495 | 0.41420 | 1.0000 |
| O | O82  | 1.0 | 0.68313 | 0.34113 | 0.43336 | 1.0000 |
| O | O83  | 1.0 | 0.83243 | 0.18882 | 0.42773 | 1.0000 |
| O | O84  | 1.0 | 0.64354 | 0.15533 | 0.39051 | 1.0000 |
| O | O85  | 1.0 | 0.82943 | 0.49529 | 0.43532 | 1.0000 |
| O | O86  | 1.0 | 0.63879 | 0.53694 | 0.40393 | 1.0000 |
| O | O87  | 1.0 | 0.97793 | 0.34193 | 0.43924 | 1.0000 |
| O | O88  | 1.0 | 0.02730 | 0.15473 | 0.39962 | 1.0000 |
| O | O89  | 1.0 | 0.01849 | 0.52936 | 0.39959 | 1.0000 |
| O | O90  | 1.0 | 0.67179 | 0.37684 | 0.69120 | 1.0000 |
| O | O91  | 1.0 | 0.83321 | 0.33060 | 0.75405 | 1.0000 |
| O | O92  | 1.0 | 0.81357 | 0.22578 | 0.66800 | 1.0000 |
| O | O93  | 1.0 | 0.86998 | 0.43023 | 0.66932 | 1.0000 |
| O | O94  | 1.0 | 0.51283 | 0.33421 | 0.75483 | 1.0000 |
| O | O95  | 1.0 | 0.52609 | 0.23327 | 0.66594 | 1.0000 |
| O | O96  | 1.0 | 0.47409 | 0.43942 | 0.67216 | 1.0000 |
| O | O97  | 1.0 | 0.67127 | 0.70635 | 0.68155 | 1.0000 |
| O | O98  | 1.0 | 0.84342 | 0.83066 | 0.69164 | 1.0000 |
| O | O99  | 1.0 | 0.85933 | 0.64058 | 0.65249 | 1.0000 |
| O | O100 | 1.0 | 0.50202 | 0.82886 | 0.69473 | 1.0000 |
| O | O101 | 1.0 | 0.48443 | 0.64496 | 0.64713 | 1.0000 |
| O | O102 | 1.0 | 0.67338 | 0.95540 | 0.69353 | 1.0000 |
| O | O103 | 1.0 | 0.85276 | 0.02163 | 0.64987 | 1.0000 |
| O | O104 | 1.0 | 0.49545 | 0.01115 | 0.64586 | 1.0000 |
| O | O105 | 1.0 | 0.34085 | 0.69185 | 0.18930 | 1.0000 |
| O | O106 | 1.0 | 0.17129 | 0.65069 | 0.24722 | 1.0000 |
| O | O107 | 1.0 | 0.15269 | 0.76880 | 0.16567 | 1.0000 |
| O | O108 | 1.0 | 0.18713 | 0.55799 | 0.16003 | 1.0000 |

|    |      |     |         |         |         |        |
|----|------|-----|---------|---------|---------|--------|
| O  | O109 | 1.0 | 0.50109 | 0.66862 | 0.25420 | 1.0000 |
| O  | O110 | 1.0 | 0.53585 | 0.75252 | 0.16422 | 1.0000 |
| O  | O111 | 1.0 | 0.49296 | 0.54673 | 0.17289 | 1.0000 |
| O  | O112 | 1.0 | 0.33554 | 0.29323 | 0.18470 | 1.0000 |
| O  | O113 | 1.0 | 0.16682 | 0.16581 | 0.18773 | 1.0000 |
| O  | O114 | 1.0 | 0.14953 | 0.35326 | 0.14617 | 1.0000 |
| O  | O115 | 1.0 | 0.50106 | 0.16034 | 0.18846 | 1.0000 |
| O  | O116 | 1.0 | 0.52271 | 0.34697 | 0.14704 | 1.0000 |
| O  | O117 | 1.0 | 0.33256 | 0.03150 | 0.19441 | 1.0000 |
| O  | O118 | 1.0 | 0.15698 | 0.97623 | 0.14625 | 1.0000 |
| O  | O119 | 1.0 | 0.51776 | 0.96283 | 0.15986 | 1.0000 |
| O  | O120 | 1.0 | 0.00145 | 0.84351 | 0.00080 | 1.0000 |
| O  | O121 | 1.0 | 0.99629 | 0.50370 | 0.00044 | 1.0000 |
| O  | O122 | 1.0 | 0.98100 | 0.17308 | 0.49844 | 1.0000 |
| O  | O123 | 1.0 | 0.99018 | 0.51206 | 0.49867 | 1.0000 |
| O  | O124 | 1.0 | 0.15705 | 0.99642 | 0.24632 | 1.0000 |
| O  | O125 | 1.0 | 0.49458 | 0.00761 | 0.25725 | 1.0000 |
| O  | O126 | 1.0 | 0.84414 | 0.00244 | 0.74930 | 1.0000 |
| O  | O127 | 1.0 | 0.50336 | 0.00701 | 0.74669 | 1.0000 |
| O  | O128 | 1.0 | 0.13222 | 0.00858 | 0.34639 | 1.0000 |
| Al | Al1  | 1.0 | 0.46579 | 0.13871 | 0.62868 | 1.0000 |
| Al | Al2  | 1.0 | 0.15439 | 0.14236 | 0.37700 | 1.0000 |
| Si | Si1  | 1.0 | 0.33369 | 0.78669 | 0.05774 | 1.0000 |
| Si | Si2  | 1.0 | 0.33914 | 0.53372 | 0.05353 | 1.0000 |
| Si | Si3  | 1.0 | 0.70785 | 0.79885 | 0.05494 | 1.0000 |
| Si | Si4  | 1.0 | 0.71155 | 0.54493 | 0.06151 | 1.0000 |
| Si | Si5  | 1.0 | 0.95373 | 0.80205 | 0.05407 | 1.0000 |
| Si | Si6  | 1.0 | 0.95703 | 0.54500 | 0.05548 | 1.0000 |
| Si | Si7  | 1.0 | 0.52997 | 0.85534 | 0.12702 | 1.0000 |
| Si | Si8  | 1.0 | 0.65988 | 0.20024 | 0.54975 | 1.0000 |
| Si | Si9  | 1.0 | 0.66634 | 0.45645 | 0.55907 | 1.0000 |
| Si | Si10 | 1.0 | 0.27440 | 0.20829 | 0.56368 | 1.0000 |
| Si | Si11 | 1.0 | 0.28445 | 0.46351 | 0.55616 | 1.0000 |
| Si | Si12 | 1.0 | 0.02928 | 0.21310 | 0.55237 | 1.0000 |



|    |      |     |         |         |         |        |
|----|------|-----|---------|---------|---------|--------|
| Si | Si13 | 1.0 | 0.04191 | 0.47073 | 0.55143 | 1.0000 |
| Si | Si14 | 1.0 | 0.21208 | 0.33719 | 0.30473 | 1.0000 |
| Si | Si15 | 1.0 | 0.46261 | 0.34426 | 0.30483 | 1.0000 |
| Si | Si16 | 1.0 | 0.20072 | 0.70347 | 0.30140 | 1.0000 |
| Si | Si17 | 1.0 | 0.45692 | 0.71500 | 0.30756 | 1.0000 |
| Si | Si18 | 1.0 | 0.45106 | 0.95859 | 0.30995 | 1.0000 |
| Si | Si19 | 1.0 | 0.13584 | 0.52276 | 0.37478 | 1.0000 |
| Si | Si20 | 1.0 | 0.79028 | 0.66414 | 0.80899 | 1.0000 |
| Si | Si21 | 1.0 | 0.53828 | 0.66216 | 0.80564 | 1.0000 |
| Si | Si22 | 1.0 | 0.80118 | 0.28546 | 0.80945 | 1.0000 |
| Si | Si23 | 1.0 | 0.54626 | 0.28569 | 0.80925 | 1.0000 |
| Si | Si24 | 1.0 | 0.80142 | 0.03996 | 0.80435 | 1.0000 |
| Si | Si25 | 1.0 | 0.54475 | 0.04050 | 0.80245 | 1.0000 |
| Si | Si26 | 1.0 | 0.85632 | 0.46818 | 0.87838 | 1.0000 |
| Si | Si27 | 1.0 | 0.67064 | 0.78566 | 0.94073 | 1.0000 |
| Si | Si28 | 1.0 | 0.66657 | 0.52991 | 0.94739 | 1.0000 |
| Si | Si29 | 1.0 | 0.29383 | 0.79412 | 0.94274 | 1.0000 |
| Si | Si30 | 1.0 | 0.28870 | 0.54254 | 0.93926 | 1.0000 |
| Si | Si31 | 1.0 | 0.05075 | 0.80199 | 0.94769 | 1.0000 |
| Si | Si32 | 1.0 | 0.04457 | 0.54425 | 0.94673 | 1.0000 |
| Si | Si33 | 1.0 | 0.47227 | 0.85291 | 0.87064 | 1.0000 |
| Si | Si34 | 1.0 | 0.33519 | 0.19798 | 0.45081 | 1.0000 |
| Si | Si35 | 1.0 | 0.32801 | 0.45119 | 0.44364 | 1.0000 |
| Si | Si36 | 1.0 | 0.70834 | 0.21469 | 0.43569 | 1.0000 |
| Si | Si37 | 1.0 | 0.70561 | 0.46676 | 0.44407 | 1.0000 |
| Si | Si38 | 1.0 | 0.95659 | 0.21397 | 0.44098 | 1.0000 |
| Si | Si39 | 1.0 | 0.95384 | 0.46817 | 0.44367 | 1.0000 |
| Si | Si40 | 1.0 | 0.51701 | 0.14822 | 0.37734 | 1.0000 |
| Si | Si41 | 1.0 | 0.79583 | 0.34017 | 0.69560 | 1.0000 |
| Si | Si42 | 1.0 | 0.54533 | 0.34278 | 0.69548 | 1.0000 |
| Si | Si43 | 1.0 | 0.79748 | 0.70987 | 0.69438 | 1.0000 |
| Si | Si44 | 1.0 | 0.54411 | 0.70794 | 0.69250 | 1.0000 |
| Si | Si45 | 1.0 | 0.80195 | 0.95274 | 0.69604 | 1.0000 |
| Si | Si46 | 1.0 | 0.54323 | 0.95194 | 0.69405 | 1.0000 |

|    |      |     |         |         |         |        |
|----|------|-----|---------|---------|---------|--------|
| Si | Si47 | 1.0 | 0.86777 | 0.52412 | 0.62723 | 1.0000 |
| Si | Si48 | 1.0 | 0.21328 | 0.66672 | 0.18960 | 1.0000 |
| Si | Si49 | 1.0 | 0.46744 | 0.66415 | 0.19481 | 1.0000 |
| Si | Si50 | 1.0 | 0.20698 | 0.28875 | 0.19158 | 1.0000 |
| Si | Si51 | 1.0 | 0.46365 | 0.28347 | 0.19210 | 1.0000 |
| Si | Si52 | 1.0 | 0.20421 | 0.04367 | 0.19312 | 1.0000 |
| Si | Si53 | 1.0 | 0.46120 | 0.04052 | 0.19988 | 1.0000 |
| Si | Si54 | 1.0 | 0.14929 | 0.46899 | 0.11929 | 1.0000 |
| Si | Si55 | 1.0 | 0.13842 | 0.85904 | 0.12208 | 1.0000 |
| Si | Si56 | 1.0 | 0.52649 | 0.46831 | 0.12648 | 1.0000 |
| Si | Si57 | 1.0 | 0.84178 | 0.13875 | 0.62487 | 1.0000 |
| Si | Si58 | 1.0 | 0.46758 | 0.52480 | 0.62646 | 1.0000 |
| Si | Si59 | 1.0 | 0.52555 | 0.52568 | 0.37504 | 1.0000 |
| Si | Si60 | 1.0 | 0.86841 | 0.85535 | 0.87537 | 1.0000 |
| Si | Si61 | 1.0 | 0.47479 | 0.46743 | 0.87623 | 1.0000 |
| Si | Si62 | 1.0 | 0.19540 | 0.94433 | 0.29871 | 1.0000 |

AlSiAl-T7T9:

data\_image0

\_chemical\_formula\_structural H2O128Al2Si62  
\_chemical\_formula\_sum "H2 O128 Al2 Si62"  
\_cell\_length\_a 12.5357  
\_cell\_length\_b 12.5453  
\_cell\_length\_c 26.484  
\_cell\_angle\_alpha 90.1445  
\_cell\_angle\_beta 90.2488  
\_cell\_angle\_gamma 90.2321

\_space\_group\_name\_H-M\_alt "P 1"

\_space\_group\_IT\_number 1

loop\_

\_space\_group\_symop\_operation\_xyz

'x, y, z'

loop\_

\_atom\_site\_type\_symbol

\_atom\_site\_label

\_atom\_site\_symmetry\_multiplicity

\_atom\_site\_fract\_x

\_atom\_site\_fract\_y

\_atom\_site\_fract\_z

\_atom\_site\_occupancy

|   |    |     |         |         |         |        |
|---|----|-----|---------|---------|---------|--------|
| H | H1 | 1.0 | 0.47948 | 0.16124 | 0.53386 | 1.0000 |
| H | H2 | 1.0 | 0.93248 | 0.97184 | 0.64033 | 1.0000 |
| O | O1 | 1.0 | 0.32599 | 0.65896 | 0.06896 | 1.0000 |
| O | O2 | 1.0 | 0.34973 | 0.80891 | 0.99851 | 1.0000 |
| O | O3 | 1.0 | 0.22095 | 0.84055 | 0.07599 | 1.0000 |
| O | O4 | 1.0 | 0.43069 | 0.83988 | 0.08854 | 1.0000 |
| O | O5 | 1.0 | 0.34387 | 0.51839 | 0.99324 | 1.0000 |
| O | O6 | 1.0 | 0.23317 | 0.46932 | 0.07502 | 1.0000 |

|   |     |     |         |         |         |        |
|---|-----|-----|---------|---------|---------|--------|
| O | O7  | 1.0 | 0.44639 | 0.48605 | 0.07728 | 1.0000 |
| O | O8  | 1.0 | 0.70655 | 0.67587 | 0.07003 | 1.0000 |
| O | O9  | 1.0 | 0.82943 | 0.84558 | 0.05630 | 1.0000 |
| O | O10 | 1.0 | 0.64021 | 0.86785 | 0.09601 | 1.0000 |
| O | O11 | 1.0 | 0.83616 | 0.50821 | 0.06541 | 1.0000 |
| O | O12 | 1.0 | 0.64778 | 0.49292 | 0.10871 | 1.0000 |
| O | O13 | 1.0 | 0.96202 | 0.67804 | 0.05727 | 1.0000 |
| O | O14 | 1.0 | 0.01687 | 0.86189 | 0.09899 | 1.0000 |
| O | O15 | 1.0 | 0.03133 | 0.50280 | 0.10221 | 1.0000 |
| O | O16 | 1.0 | 0.67691 | 0.32130 | 0.55836 | 1.0000 |
| O | O17 | 1.0 | 0.67278 | 0.16739 | 0.48818 | 1.0000 |
| O | O18 | 1.0 | 0.73596 | 0.12513 | 0.58338 | 1.0000 |
| O | O19 | 1.0 | 0.53360 | 0.16084 | 0.56156 | 1.0000 |
| O | O20 | 1.0 | 0.66369 | 0.49386 | 0.50102 | 1.0000 |
| O | O21 | 1.0 | 0.76911 | 0.50127 | 0.58744 | 1.0000 |
| O | O22 | 1.0 | 0.55694 | 0.48693 | 0.58507 | 1.0000 |
| O | O23 | 1.0 | 0.28526 | 0.33496 | 0.56625 | 1.0000 |
| O | O24 | 1.0 | 0.15581 | 0.16726 | 0.55376 | 1.0000 |
| O | O25 | 1.0 | 0.33702 | 0.14895 | 0.60653 | 1.0000 |
| O | O26 | 1.0 | 0.16622 | 0.50715 | 0.55731 | 1.0000 |
| O | O27 | 1.0 | 0.35278 | 0.52192 | 0.60079 | 1.0000 |
| O | O28 | 1.0 | 0.03222 | 0.33877 | 0.55349 | 1.0000 |
| O | O29 | 1.0 | 0.96386 | 0.15812 | 0.59533 | 1.0000 |
| O | O30 | 1.0 | 0.97957 | 0.52022 | 0.59797 | 1.0000 |
| O | O31 | 1.0 | 0.33559 | 0.37304 | 0.31081 | 1.0000 |
| O | O32 | 1.0 | 0.17299 | 0.33243 | 0.24795 | 1.0000 |
| O | O33 | 1.0 | 0.19180 | 0.22491 | 0.33376 | 1.0000 |
| O | O34 | 1.0 | 0.14001 | 0.43087 | 0.33420 | 1.0000 |
| O | O35 | 1.0 | 0.49375 | 0.34089 | 0.24518 | 1.0000 |
| O | O36 | 1.0 | 0.48579 | 0.22998 | 0.32948 | 1.0000 |
| O | O37 | 1.0 | 0.53262 | 0.43908 | 0.33020 | 1.0000 |
| O | O38 | 1.0 | 0.32939 | 0.71222 | 0.31082 | 1.0000 |
| O | O39 | 1.0 | 0.15575 | 0.83238 | 0.30765 | 1.0000 |
| O | O40 | 1.0 | 0.14759 | 0.64218 | 0.34695 | 1.0000 |

|   |     |     |         |         |         |        |
|---|-----|-----|---------|---------|---------|--------|
| O | O41 | 1.0 | 0.49929 | 0.83714 | 0.31374 | 1.0000 |
| O | O42 | 1.0 | 0.50564 | 0.64538 | 0.35332 | 1.0000 |
| O | O43 | 1.0 | 0.32604 | 0.96024 | 0.30705 | 1.0000 |
| O | O44 | 1.0 | 0.14471 | 0.02216 | 0.34876 | 1.0000 |
| O | O45 | 1.0 | 0.49872 | 0.02676 | 0.35501 | 1.0000 |
| O | O46 | 1.0 | 0.66254 | 0.69038 | 0.81406 | 1.0000 |
| O | O47 | 1.0 | 0.82373 | 0.64431 | 0.75189 | 1.0000 |
| O | O48 | 1.0 | 0.85560 | 0.76419 | 0.83209 | 1.0000 |
| O | O49 | 1.0 | 0.81579 | 0.55466 | 0.84061 | 1.0000 |
| O | O50 | 1.0 | 0.51101 | 0.64958 | 0.74596 | 1.0000 |
| O | O51 | 1.0 | 0.46503 | 0.75298 | 0.83079 | 1.0000 |
| O | O52 | 1.0 | 0.50891 | 0.54653 | 0.83192 | 1.0000 |
| O | O53 | 1.0 | 0.67122 | 0.29423 | 0.81930 | 1.0000 |
| O | O54 | 1.0 | 0.83768 | 0.16385 | 0.81326 | 1.0000 |
| O | O55 | 1.0 | 0.85948 | 0.35073 | 0.85609 | 1.0000 |
| O | O56 | 1.0 | 0.50756 | 0.15886 | 0.81407 | 1.0000 |
| O | O57 | 1.0 | 0.48193 | 0.34486 | 0.85431 | 1.0000 |
| O | O58 | 1.0 | 0.67319 | 0.02648 | 0.80786 | 1.0000 |
| O | O59 | 1.0 | 0.85383 | 0.97252 | 0.85192 | 1.0000 |
| O | O60 | 1.0 | 0.48608 | 0.96240 | 0.84133 | 1.0000 |
| O | O61 | 1.0 | 0.67417 | 0.65534 | 0.93454 | 1.0000 |
| O | O62 | 1.0 | 0.65515 | 0.81708 | 0.99949 | 1.0000 |
| O | O63 | 1.0 | 0.78188 | 0.83402 | 0.92046 | 1.0000 |
| O | O64 | 1.0 | 0.57104 | 0.83278 | 0.90946 | 1.0000 |
| O | O65 | 1.0 | 0.65780 | 0.51365 | 0.00956 | 1.0000 |
| O | O66 | 1.0 | 0.76746 | 0.46663 | 0.92812 | 1.0000 |
| O | O67 | 1.0 | 0.55482 | 0.48076 | 0.92463 | 1.0000 |
| O | O68 | 1.0 | 0.29244 | 0.66974 | 0.92748 | 1.0000 |
| O | O69 | 1.0 | 0.17389 | 0.84152 | 0.94375 | 1.0000 |
| O | O70 | 1.0 | 0.36193 | 0.86085 | 0.90205 | 1.0000 |
| O | O71 | 1.0 | 0.16553 | 0.50076 | 0.93919 | 1.0000 |
| O | O72 | 1.0 | 0.35302 | 0.48219 | 0.89482 | 1.0000 |
| O | O73 | 1.0 | 0.04310 | 0.67286 | 0.94588 | 1.0000 |
| O | O74 | 1.0 | 0.98768 | 0.85062 | 0.89908 | 1.0000 |

|   |      |     |         |         |         |        |
|---|------|-----|---------|---------|---------|--------|
| O | O75  | 1.0 | 0.97098 | 0.49591 | 0.90338 | 1.0000 |
| O | O76  | 1.0 | 0.30842 | 0.32803 | 0.43805 | 1.0000 |
| O | O77  | 1.0 | 0.34573 | 0.17640 | 0.50794 | 1.0000 |
| O | O78  | 1.0 | 0.23947 | 0.13309 | 0.42178 | 1.0000 |
| O | O79  | 1.0 | 0.45012 | 0.17204 | 0.42459 | 1.0000 |
| O | O80  | 1.0 | 0.34101 | 0.48851 | 0.50210 | 1.0000 |
| O | O81  | 1.0 | 0.22507 | 0.51531 | 0.41831 | 1.0000 |
| O | O82  | 1.0 | 0.43535 | 0.49160 | 0.41467 | 1.0000 |
| O | O83  | 1.0 | 0.69448 | 0.34106 | 0.43294 | 1.0000 |
| O | O84  | 1.0 | 0.83698 | 0.18326 | 0.42454 | 1.0000 |
| O | O85  | 1.0 | 0.64463 | 0.15901 | 0.38867 | 1.0000 |
| O | O86  | 1.0 | 0.83015 | 0.50432 | 0.43913 | 1.0000 |
| O | O87  | 1.0 | 0.64055 | 0.53500 | 0.40394 | 1.0000 |
| O | O88  | 1.0 | 0.97188 | 0.34487 | 0.43870 | 1.0000 |
| O | O89  | 1.0 | 0.03611 | 0.16593 | 0.39741 | 1.0000 |
| O | O90  | 1.0 | 0.01720 | 0.53199 | 0.39959 | 1.0000 |
| O | O91  | 1.0 | 0.67068 | 0.37529 | 0.69233 | 1.0000 |
| O | O92  | 1.0 | 0.83041 | 0.34046 | 0.75715 | 1.0000 |
| O | O93  | 1.0 | 0.81153 | 0.21715 | 0.67609 | 1.0000 |
| O | O94  | 1.0 | 0.86860 | 0.42209 | 0.66834 | 1.0000 |
| O | O95  | 1.0 | 0.51129 | 0.32881 | 0.75471 | 1.0000 |
| O | O96  | 1.0 | 0.52251 | 0.23492 | 0.66361 | 1.0000 |
| O | O97  | 1.0 | 0.47354 | 0.44089 | 0.67445 | 1.0000 |
| O | O98  | 1.0 | 0.67345 | 0.70092 | 0.68612 | 1.0000 |
| O | O99  | 1.0 | 0.84737 | 0.82043 | 0.69655 | 1.0000 |
| O | O100 | 1.0 | 0.85954 | 0.63343 | 0.65368 | 1.0000 |
| O | O101 | 1.0 | 0.50790 | 0.82906 | 0.69284 | 1.0000 |
| O | O102 | 1.0 | 0.49013 | 0.64359 | 0.64619 | 1.0000 |
| O | O103 | 1.0 | 0.68007 | 0.95506 | 0.69056 | 1.0000 |
| O | O104 | 1.0 | 0.50224 | 0.01142 | 0.64334 | 1.0000 |
| O | O105 | 1.0 | 0.33973 | 0.70036 | 0.18874 | 1.0000 |
| O | O106 | 1.0 | 0.17252 | 0.66043 | 0.24839 | 1.0000 |
| O | O107 | 1.0 | 0.14633 | 0.76275 | 0.16255 | 1.0000 |
| O | O108 | 1.0 | 0.19280 | 0.55525 | 0.16409 | 1.0000 |

|    |      |     |         |         |         |        |
|----|------|-----|---------|---------|---------|--------|
| O  | O109 | 1.0 | 0.49739 | 0.66481 | 0.25408 | 1.0000 |
| O  | O110 | 1.0 | 0.53652 | 0.75962 | 0.16672 | 1.0000 |
| O  | O111 | 1.0 | 0.48893 | 0.55283 | 0.17043 | 1.0000 |
| O  | O112 | 1.0 | 0.33141 | 0.29727 | 0.18370 | 1.0000 |
| O  | O113 | 1.0 | 0.16549 | 0.16483 | 0.18633 | 1.0000 |
| O  | O114 | 1.0 | 0.14202 | 0.35508 | 0.14864 | 1.0000 |
| O  | O115 | 1.0 | 0.49861 | 0.16549 | 0.18899 | 1.0000 |
| O  | O116 | 1.0 | 0.51899 | 0.35102 | 0.14625 | 1.0000 |
| O  | O117 | 1.0 | 0.33259 | 0.03382 | 0.19491 | 1.0000 |
| O  | O118 | 1.0 | 0.15664 | 0.97281 | 0.14887 | 1.0000 |
| O  | O119 | 1.0 | 0.51616 | 0.97010 | 0.15660 | 1.0000 |
| O  | O120 | 1.0 | 0.99999 | 0.84618 | 0.99916 | 1.0000 |
| O  | O121 | 1.0 | 0.00165 | 0.50471 | 0.00284 | 1.0000 |
| O  | O122 | 1.0 | 0.98533 | 0.17189 | 0.49568 | 1.0000 |
| O  | O123 | 1.0 | 0.99721 | 0.51255 | 0.49887 | 1.0000 |
| O  | O124 | 1.0 | 0.15814 | 0.00165 | 0.24884 | 1.0000 |
| O  | O125 | 1.0 | 0.50014 | 0.00729 | 0.25492 | 1.0000 |
| O  | O126 | 1.0 | 0.84555 | 0.99644 | 0.75246 | 1.0000 |
| O  | O127 | 1.0 | 0.51046 | 0.00852 | 0.74409 | 1.0000 |
| O  | O128 | 1.0 | 0.86716 | 0.00505 | 0.65245 | 1.0000 |
| Al | Al1  | 1.0 | 0.46873 | 0.13811 | 0.62530 | 1.0000 |
| Al | Al2  | 1.0 | 0.84273 | 0.14093 | 0.62443 | 1.0000 |
| Si | Si1  | 1.0 | 0.33227 | 0.78675 | 0.05815 | 1.0000 |
| Si | Si2  | 1.0 | 0.33708 | 0.53324 | 0.05378 | 1.0000 |
| Si | Si3  | 1.0 | 0.70816 | 0.80110 | 0.05510 | 1.0000 |
| Si | Si4  | 1.0 | 0.71302 | 0.54769 | 0.06291 | 1.0000 |
| Si | Si5  | 1.0 | 0.95206 | 0.80674 | 0.05278 | 1.0000 |
| Si | Si6  | 1.0 | 0.95788 | 0.54877 | 0.05675 | 1.0000 |
| Si | Si7  | 1.0 | 0.52976 | 0.85847 | 0.12707 | 1.0000 |
| Si | Si8  | 1.0 | 0.66159 | 0.19459 | 0.54778 | 1.0000 |
| Si | Si9  | 1.0 | 0.66657 | 0.45093 | 0.55876 | 1.0000 |
| Si | Si10 | 1.0 | 0.27825 | 0.20614 | 0.56065 | 1.0000 |
| Si | Si11 | 1.0 | 0.28673 | 0.46216 | 0.55659 | 1.0000 |
| Si | Si12 | 1.0 | 0.03295 | 0.20897 | 0.55073 | 1.0000 |

|    |      |     |         |         |         |        |
|----|------|-----|---------|---------|---------|--------|
| Si | Si13 | 1.0 | 0.04398 | 0.46730 | 0.55184 | 1.0000 |
| Si | Si14 | 1.0 | 0.20991 | 0.33970 | 0.30669 | 1.0000 |
| Si | Si15 | 1.0 | 0.46188 | 0.34540 | 0.30421 | 1.0000 |
| Si | Si16 | 1.0 | 0.20155 | 0.71210 | 0.30315 | 1.0000 |
| Si | Si17 | 1.0 | 0.45790 | 0.71510 | 0.30754 | 1.0000 |
| Si | Si18 | 1.0 | 0.19696 | 0.95449 | 0.30299 | 1.0000 |
| Si | Si19 | 1.0 | 0.45525 | 0.95775 | 0.30737 | 1.0000 |
| Si | Si20 | 1.0 | 0.13441 | 0.52867 | 0.37457 | 1.0000 |
| Si | Si21 | 1.0 | 0.78922 | 0.66250 | 0.81036 | 1.0000 |
| Si | Si22 | 1.0 | 0.53677 | 0.65931 | 0.80584 | 1.0000 |
| Si | Si23 | 1.0 | 0.79905 | 0.28728 | 0.81074 | 1.0000 |
| Si | Si24 | 1.0 | 0.54365 | 0.28241 | 0.80955 | 1.0000 |
| Si | Si25 | 1.0 | 0.80137 | 0.04115 | 0.80670 | 1.0000 |
| Si | Si26 | 1.0 | 0.54477 | 0.03898 | 0.80134 | 1.0000 |
| Si | Si27 | 1.0 | 0.85325 | 0.46742 | 0.88212 | 1.0000 |
| Si | Si28 | 1.0 | 0.67010 | 0.78445 | 0.94066 | 1.0000 |
| Si | Si29 | 1.0 | 0.66320 | 0.52941 | 0.94892 | 1.0000 |
| Si | Si30 | 1.0 | 0.29411 | 0.79487 | 0.94323 | 1.0000 |
| Si | Si31 | 1.0 | 0.28814 | 0.54278 | 0.93898 | 1.0000 |
| Si | Si32 | 1.0 | 0.05109 | 0.80190 | 0.94706 | 1.0000 |
| Si | Si33 | 1.0 | 0.04513 | 0.54382 | 0.94804 | 1.0000 |
| Si | Si34 | 1.0 | 0.47225 | 0.85145 | 0.87081 | 1.0000 |
| Si | Si35 | 1.0 | 0.33455 | 0.20283 | 0.44759 | 1.0000 |
| Si | Si36 | 1.0 | 0.32753 | 0.45651 | 0.44310 | 1.0000 |
| Si | Si37 | 1.0 | 0.71338 | 0.21336 | 0.43390 | 1.0000 |
| Si | Si38 | 1.0 | 0.70759 | 0.46754 | 0.44485 | 1.0000 |
| Si | Si39 | 1.0 | 0.95830 | 0.21644 | 0.43966 | 1.0000 |
| Si | Si40 | 1.0 | 0.95399 | 0.47225 | 0.44441 | 1.0000 |
| Si | Si41 | 1.0 | 0.51943 | 0.14771 | 0.37393 | 1.0000 |
| Si | Si42 | 1.0 | 0.79435 | 0.33548 | 0.69787 | 1.0000 |
| Si | Si43 | 1.0 | 0.54440 | 0.34123 | 0.69551 | 1.0000 |
| Si | Si44 | 1.0 | 0.79980 | 0.69843 | 0.69743 | 1.0000 |
| Si | Si45 | 1.0 | 0.54494 | 0.70602 | 0.69306 | 1.0000 |
| Si | Si46 | 1.0 | 0.54828 | 0.95234 | 0.69163 | 1.0000 |



|    |      |     |         |         |         |        |
|----|------|-----|---------|---------|---------|--------|
| Si | Si47 | 1.0 | 0.86711 | 0.51702 | 0.62717 | 1.0000 |
| Si | Si48 | 1.0 | 0.21311 | 0.66958 | 0.19045 | 1.0000 |
| Si | Si49 | 1.0 | 0.46553 | 0.66884 | 0.19462 | 1.0000 |
| Si | Si50 | 1.0 | 0.20345 | 0.28777 | 0.19202 | 1.0000 |
| Si | Si51 | 1.0 | 0.45962 | 0.28815 | 0.19134 | 1.0000 |
| Si | Si52 | 1.0 | 0.20370 | 0.04315 | 0.19496 | 1.0000 |
| Si | Si53 | 1.0 | 0.46122 | 0.04388 | 0.19895 | 1.0000 |
| Si | Si54 | 1.0 | 0.14944 | 0.47119 | 0.12203 | 1.0000 |
| Si | Si55 | 1.0 | 0.13678 | 0.85903 | 0.12185 | 1.0000 |
| Si | Si56 | 1.0 | 0.52534 | 0.47216 | 0.12556 | 1.0000 |
| Si | Si57 | 1.0 | 0.46962 | 0.52213 | 0.62710 | 1.0000 |
| Si | Si58 | 1.0 | 0.15275 | 0.13818 | 0.37551 | 1.0000 |
| Si | Si59 | 1.0 | 0.52698 | 0.52747 | 0.37523 | 1.0000 |
| Si | Si60 | 1.0 | 0.86820 | 0.85482 | 0.87583 | 1.0000 |
| Si | Si61 | 1.0 | 0.47508 | 0.46465 | 0.87653 | 1.0000 |
| Si | Si62 | 1.0 | 0.80452 | 0.94115 | 0.70101 | 1.0000 |

T1T7T7:

data\_image0

\_chemical\_formula\_structural H3O128Al3Si61  
\_chemical\_formula\_sum "H3 O128 Al3 Si61"  
\_cell\_length\_a 12.5705  
\_cell\_length\_b 12.5379  
\_cell\_length\_c 26.4793  
\_cell\_angle\_alpha 90.0149  
\_cell\_angle\_beta 90.0909  
\_cell\_angle\_gamma 90.5565

\_space\_group\_name\_H-M\_alt "P 1"

\_space\_group\_IT\_number 1

loop\_

\_space\_group\_symop\_operation\_xyz

'x, y, z'

loop\_

\_atom\_site\_type\_symbol

\_atom\_site\_label

\_atom\_site\_symmetry\_multiplicity

\_atom\_site\_fract\_x

\_atom\_site\_fract\_y

\_atom\_site\_fract\_z

\_atom\_site\_occupancy

|   |    |     |         |         |         |        |
|---|----|-----|---------|---------|---------|--------|
| H | H1 | 1.0 | 0.48149 | 0.14561 | 0.53397 | 1.0000 |
| H | H2 | 1.0 | 0.85129 | 0.51398 | 0.71680 | 1.0000 |
| H | H3 | 1.0 | 0.10393 | 0.81953 | 0.34567 | 1.0000 |
| O | O1 | 1.0 | 0.32749 | 0.65578 | 0.06728 | 1.0000 |
| O | O2 | 1.0 | 0.34626 | 0.80971 | 0.99802 | 1.0000 |
| O | O3 | 1.0 | 0.22158 | 0.83520 | 0.07699 | 1.0000 |
| O | O4 | 1.0 | 0.43225 | 0.83703 | 0.08669 | 1.0000 |
| O | O5 | 1.0 | 0.33603 | 0.50840 | 0.99393 | 1.0000 |

|   |     |     |         |         |         |        |
|---|-----|-----|---------|---------|---------|--------|
| O | O6  | 1.0 | 0.23393 | 0.46724 | 0.07909 | 1.0000 |
| O | O7  | 1.0 | 0.44570 | 0.48176 | 0.07581 | 1.0000 |
| O | O8  | 1.0 | 0.69647 | 0.67165 | 0.06257 | 1.0000 |
| O | O9  | 1.0 | 0.83130 | 0.83522 | 0.05837 | 1.0000 |
| O | O10 | 1.0 | 0.64112 | 0.86366 | 0.09467 | 1.0000 |
| O | O11 | 1.0 | 0.83558 | 0.51050 | 0.06530 | 1.0000 |
| O | O12 | 1.0 | 0.64697 | 0.48747 | 0.10412 | 1.0000 |
| O | O13 | 1.0 | 0.97078 | 0.67379 | 0.05813 | 1.0000 |
| O | O14 | 1.0 | 0.01856 | 0.85996 | 0.09878 | 1.0000 |
| O | O15 | 1.0 | 0.02951 | 0.49259 | 0.10024 | 1.0000 |
| O | O16 | 1.0 | 0.63441 | 0.32978 | 0.55499 | 1.0000 |
| O | O17 | 1.0 | 0.68149 | 0.17132 | 0.49141 | 1.0000 |
| O | O18 | 1.0 | 0.73895 | 0.15631 | 0.58838 | 1.0000 |
| O | O19 | 1.0 | 0.53595 | 0.14286 | 0.56136 | 1.0000 |
| O | O20 | 1.0 | 0.67087 | 0.50680 | 0.50276 | 1.0000 |
| O | O21 | 1.0 | 0.77198 | 0.47144 | 0.59028 | 1.0000 |
| O | O22 | 1.0 | 0.56367 | 0.51612 | 0.58623 | 1.0000 |
| O | O23 | 1.0 | 0.28151 | 0.32845 | 0.56967 | 1.0000 |
| O | O24 | 1.0 | 0.15292 | 0.15996 | 0.55477 | 1.0000 |
| O | O25 | 1.0 | 0.33360 | 0.14050 | 0.60662 | 1.0000 |
| O | O26 | 1.0 | 0.17310 | 0.50370 | 0.55297 | 1.0000 |
| O | O27 | 1.0 | 0.35506 | 0.51500 | 0.60282 | 1.0000 |
| O | O28 | 1.0 | 0.03903 | 0.33569 | 0.55105 | 1.0000 |
| O | O29 | 1.0 | 0.95336 | 0.15852 | 0.58986 | 1.0000 |
| O | O30 | 1.0 | 0.99587 | 0.50612 | 0.60581 | 1.0000 |
| O | O31 | 1.0 | 0.33495 | 0.37759 | 0.31211 | 1.0000 |
| O | O32 | 1.0 | 0.17136 | 0.33225 | 0.25126 | 1.0000 |
| O | O33 | 1.0 | 0.20298 | 0.21592 | 0.33386 | 1.0000 |
| O | O34 | 1.0 | 0.13815 | 0.41707 | 0.34100 | 1.0000 |
| O | O35 | 1.0 | 0.49449 | 0.33819 | 0.24824 | 1.0000 |
| O | O36 | 1.0 | 0.47722 | 0.22945 | 0.33384 | 1.0000 |
| O | O37 | 1.0 | 0.53308 | 0.43633 | 0.33345 | 1.0000 |
| O | O38 | 1.0 | 0.33872 | 0.71958 | 0.30975 | 1.0000 |
| O | O39 | 1.0 | 0.16913 | 0.62562 | 0.34994 | 1.0000 |

|   |     |     |         |         |         |        |
|---|-----|-----|---------|---------|---------|--------|
| O | O40 | 1.0 | 0.51420 | 0.83633 | 0.30953 | 1.0000 |
| O | O41 | 1.0 | 0.51405 | 0.64615 | 0.35099 | 1.0000 |
| O | O42 | 1.0 | 0.34109 | 0.95960 | 0.31084 | 1.0000 |
| O | O43 | 1.0 | 0.14011 | 0.01962 | 0.35543 | 1.0000 |
| O | O44 | 1.0 | 0.52588 | 0.02644 | 0.34893 | 1.0000 |
| O | O45 | 1.0 | 0.67492 | 0.67868 | 0.81726 | 1.0000 |
| O | O46 | 1.0 | 0.81938 | 0.65440 | 0.74197 | 1.0000 |
| O | O47 | 1.0 | 0.86803 | 0.75983 | 0.82614 | 1.0000 |
| O | O48 | 1.0 | 0.84056 | 0.54724 | 0.82449 | 1.0000 |
| O | O49 | 1.0 | 0.52717 | 0.64513 | 0.74779 | 1.0000 |
| O | O50 | 1.0 | 0.48126 | 0.75634 | 0.83068 | 1.0000 |
| O | O51 | 1.0 | 0.50918 | 0.54837 | 0.83458 | 1.0000 |
| O | O52 | 1.0 | 0.66206 | 0.32070 | 0.81477 | 1.0000 |
| O | O53 | 1.0 | 0.79730 | 0.15751 | 0.82614 | 1.0000 |
| O | O54 | 1.0 | 0.84971 | 0.34956 | 0.85696 | 1.0000 |
| O | O55 | 1.0 | 0.52413 | 0.15938 | 0.81895 | 1.0000 |
| O | O56 | 1.0 | 0.46708 | 0.34537 | 0.84967 | 1.0000 |
| O | O57 | 1.0 | 0.65876 | 0.99789 | 0.80878 | 1.0000 |
| O | O58 | 1.0 | 0.84315 | 0.96299 | 0.85207 | 1.0000 |
| O | O59 | 1.0 | 0.46396 | 0.96618 | 0.84043 | 1.0000 |
| O | O60 | 1.0 | 0.63080 | 0.65958 | 0.93751 | 1.0000 |
| O | O61 | 1.0 | 0.66325 | 0.82813 | 0.99693 | 1.0000 |
| O | O62 | 1.0 | 0.77921 | 0.80504 | 0.91456 | 1.0000 |
| O | O63 | 1.0 | 0.57300 | 0.85372 | 0.90857 | 1.0000 |
| O | O64 | 1.0 | 0.66779 | 0.50285 | 0.00412 | 1.0000 |
| O | O65 | 1.0 | 0.76100 | 0.50091 | 0.91507 | 1.0000 |
| O | O66 | 1.0 | 0.55214 | 0.46466 | 0.92375 | 1.0000 |
| O | O67 | 1.0 | 0.28439 | 0.66436 | 0.93100 | 1.0000 |
| O | O68 | 1.0 | 0.17101 | 0.83954 | 0.94235 | 1.0000 |
| O | O69 | 1.0 | 0.36042 | 0.84848 | 0.90089 | 1.0000 |
| O | O70 | 1.0 | 0.15996 | 0.49435 | 0.93811 | 1.0000 |
| O | O71 | 1.0 | 0.34923 | 0.48189 | 0.89507 | 1.0000 |
| O | O72 | 1.0 | 0.04093 | 0.66988 | 0.94396 | 1.0000 |
| O | O73 | 1.0 | 0.98337 | 0.84884 | 0.89893 | 1.0000 |

|   |      |     |         |         |         |        |
|---|------|-----|---------|---------|---------|--------|
| O | O74  | 1.0 | 0.96850 | 0.49385 | 0.90071 | 1.0000 |
| O | O75  | 1.0 | 0.33982 | 0.32157 | 0.43510 | 1.0000 |
| O | O76  | 1.0 | 0.34606 | 0.17422 | 0.50916 | 1.0000 |
| O | O77  | 1.0 | 0.22833 | 0.14195 | 0.42727 | 1.0000 |
| O | O78  | 1.0 | 0.44281 | 0.14028 | 0.42396 | 1.0000 |
| O | O79  | 1.0 | 0.35497 | 0.47359 | 0.50505 | 1.0000 |
| O | O80  | 1.0 | 0.22834 | 0.49741 | 0.42499 | 1.0000 |
| O | O81  | 1.0 | 0.43746 | 0.50615 | 0.41618 | 1.0000 |
| O | O82  | 1.0 | 0.70456 | 0.34894 | 0.43864 | 1.0000 |
| O | O83  | 1.0 | 0.83679 | 0.18636 | 0.42362 | 1.0000 |
| O | O84  | 1.0 | 0.64016 | 0.17335 | 0.39269 | 1.0000 |
| O | O85  | 1.0 | 0.83453 | 0.51858 | 0.43908 | 1.0000 |
| O | O86  | 1.0 | 0.64452 | 0.53715 | 0.40430 | 1.0000 |
| O | O87  | 1.0 | 0.96509 | 0.35162 | 0.44185 | 1.0000 |
| O | O88  | 1.0 | 0.03462 | 0.18256 | 0.39349 | 1.0000 |
| O | O89  | 1.0 | 0.02704 | 0.53697 | 0.40536 | 1.0000 |
| O | O90  | 1.0 | 0.67129 | 0.35642 | 0.69664 | 1.0000 |
| O | O91  | 1.0 | 0.83429 | 0.30906 | 0.75802 | 1.0000 |
| O | O92  | 1.0 | 0.84509 | 0.25822 | 0.66056 | 1.0000 |
| O | O93  | 1.0 | 0.49871 | 0.31481 | 0.75109 | 1.0000 |
| O | O94  | 1.0 | 0.52168 | 0.23115 | 0.65872 | 1.0000 |
| O | O95  | 1.0 | 0.48626 | 0.44053 | 0.67283 | 1.0000 |
| O | O96  | 1.0 | 0.66812 | 0.71896 | 0.68034 | 1.0000 |
| O | O97  | 1.0 | 0.83961 | 0.84537 | 0.69454 | 1.0000 |
| O | O98  | 1.0 | 0.85489 | 0.66207 | 0.64445 | 1.0000 |
| O | O99  | 1.0 | 0.49952 | 0.83148 | 0.70270 | 1.0000 |
| O | O100 | 1.0 | 0.47737 | 0.64855 | 0.65185 | 1.0000 |
| O | O101 | 1.0 | 0.66831 | 0.96446 | 0.69474 | 1.0000 |
| O | O102 | 1.0 | 0.84640 | 0.04354 | 0.65551 | 1.0000 |
| O | O103 | 1.0 | 0.49199 | 0.00254 | 0.64427 | 1.0000 |
| O | O104 | 1.0 | 0.33878 | 0.69541 | 0.18748 | 1.0000 |
| O | O105 | 1.0 | 0.17633 | 0.66417 | 0.25041 | 1.0000 |
| O | O106 | 1.0 | 0.14760 | 0.77093 | 0.16609 | 1.0000 |
| O | O107 | 1.0 | 0.17911 | 0.56083 | 0.16489 | 1.0000 |

|    |      |     |         |         |         |        |
|----|------|-----|---------|---------|---------|--------|
| O  | O108 | 1.0 | 0.49815 | 0.66003 | 0.25201 | 1.0000 |
| O  | O109 | 1.0 | 0.53247 | 0.76938 | 0.16838 | 1.0000 |
| O  | O110 | 1.0 | 0.49453 | 0.55975 | 0.16593 | 1.0000 |
| O  | O111 | 1.0 | 0.33071 | 0.30332 | 0.18708 | 1.0000 |
| O  | O112 | 1.0 | 0.16935 | 0.16399 | 0.18964 | 1.0000 |
| O  | O113 | 1.0 | 0.14016 | 0.35571 | 0.15285 | 1.0000 |
| O  | O114 | 1.0 | 0.49554 | 0.16827 | 0.18849 | 1.0000 |
| O  | O115 | 1.0 | 0.51810 | 0.35481 | 0.14873 | 1.0000 |
| O  | O116 | 1.0 | 0.33384 | 0.03109 | 0.19239 | 1.0000 |
| O  | O117 | 1.0 | 0.15819 | 0.97908 | 0.14478 | 1.0000 |
| O  | O118 | 1.0 | 0.51684 | 0.97796 | 0.15055 | 1.0000 |
| O  | O119 | 1.0 | 0.99824 | 0.84186 | 0.99872 | 1.0000 |
| O  | O120 | 1.0 | 0.99586 | 0.50178 | 0.00076 | 1.0000 |
| O  | O121 | 1.0 | 0.98921 | 0.17092 | 0.49221 | 1.0000 |
| O  | O122 | 1.0 | 0.99171 | 0.51535 | 0.50475 | 1.0000 |
| O  | O123 | 1.0 | 0.15994 | 0.98724 | 0.24566 | 1.0000 |
| O  | O124 | 1.0 | 0.50565 | 0.00326 | 0.24986 | 1.0000 |
| O  | O125 | 1.0 | 0.83352 | 0.01584 | 0.75374 | 1.0000 |
| O  | O126 | 1.0 | 0.49691 | 0.02188 | 0.74441 | 1.0000 |
| O  | O127 | 1.0 | 0.85518 | 0.46014 | 0.68931 | 1.0000 |
| O  | O128 | 1.0 | 0.15742 | 0.82036 | 0.31898 | 1.0000 |
| Al | Al1  | 1.0 | 0.46448 | 0.12894 | 0.62455 | 1.0000 |
| Al | Al2  | 1.0 | 0.86990 | 0.53169 | 0.62604 | 1.0000 |
| Al | Al3  | 1.0 | 0.20546 | 0.96113 | 0.30549 | 1.0000 |
| Si | Si1  | 1.0 | 0.33224 | 0.78423 | 0.05762 | 1.0000 |
| Si | Si2  | 1.0 | 0.33535 | 0.52895 | 0.05423 | 1.0000 |
| Si | Si3  | 1.0 | 0.70812 | 0.79909 | 0.05285 | 1.0000 |
| Si | Si4  | 1.0 | 0.71219 | 0.54364 | 0.05858 | 1.0000 |
| Si | Si5  | 1.0 | 0.95458 | 0.80187 | 0.05327 | 1.0000 |
| Si | Si6  | 1.0 | 0.95831 | 0.54501 | 0.05586 | 1.0000 |
| Si | Si7  | 1.0 | 0.52974 | 0.86189 | 0.12517 | 1.0000 |
| Si | Si8  | 1.0 | 0.65405 | 0.20416 | 0.54895 | 1.0000 |
| Si | Si9  | 1.0 | 0.66318 | 0.45783 | 0.55967 | 1.0000 |
| Si | Si10 | 1.0 | 0.27574 | 0.20020 | 0.56144 | 1.0000 |

|    |      |     |         |         |         |        |
|----|------|-----|---------|---------|---------|--------|
| Si | Si11 | 1.0 | 0.29094 | 0.45500 | 0.55803 | 1.0000 |
| Si | Si12 | 1.0 | 0.03385 | 0.20743 | 0.54747 | 1.0000 |
| Si | Si13 | 1.0 | 0.04911 | 0.46539 | 0.55492 | 1.0000 |
| Si | Si14 | 1.0 | 0.21179 | 0.33439 | 0.30947 | 1.0000 |
| Si | Si15 | 1.0 | 0.46015 | 0.34450 | 0.30707 | 1.0000 |
| Si | Si16 | 1.0 | 0.46810 | 0.71639 | 0.30531 | 1.0000 |
| Si | Si17 | 1.0 | 0.46757 | 0.95730 | 0.30458 | 1.0000 |
| Si | Si18 | 1.0 | 0.14201 | 0.51615 | 0.38044 | 1.0000 |
| Si | Si19 | 1.0 | 0.79946 | 0.66107 | 0.80294 | 1.0000 |
| Si | Si20 | 1.0 | 0.54771 | 0.65750 | 0.80778 | 1.0000 |
| Si | Si21 | 1.0 | 0.78524 | 0.28297 | 0.81407 | 1.0000 |
| Si | Si22 | 1.0 | 0.53754 | 0.28496 | 0.80764 | 1.0000 |
| Si | Si23 | 1.0 | 0.78334 | 0.03355 | 0.80974 | 1.0000 |
| Si | Si24 | 1.0 | 0.53583 | 0.03654 | 0.80235 | 1.0000 |
| Si | Si25 | 1.0 | 0.85378 | 0.47351 | 0.87495 | 1.0000 |
| Si | Si26 | 1.0 | 0.66175 | 0.78635 | 0.93892 | 1.0000 |
| Si | Si27 | 1.0 | 0.65328 | 0.53250 | 0.94498 | 1.0000 |
| Si | Si28 | 1.0 | 0.28989 | 0.79049 | 0.94346 | 1.0000 |
| Si | Si29 | 1.0 | 0.28221 | 0.53691 | 0.93988 | 1.0000 |
| Si | Si30 | 1.0 | 0.04835 | 0.79918 | 0.94611 | 1.0000 |
| Si | Si31 | 1.0 | 0.04106 | 0.54069 | 0.94618 | 1.0000 |
| Si | Si32 | 1.0 | 0.47116 | 0.85455 | 0.87042 | 1.0000 |
| Si | Si33 | 1.0 | 0.33776 | 0.19474 | 0.44811 | 1.0000 |
| Si | Si34 | 1.0 | 0.34017 | 0.44952 | 0.44547 | 1.0000 |
| Si | Si35 | 1.0 | 0.71610 | 0.22074 | 0.43646 | 1.0000 |
| Si | Si36 | 1.0 | 0.71352 | 0.47715 | 0.44691 | 1.0000 |
| Si | Si37 | 1.0 | 0.95747 | 0.22291 | 0.43802 | 1.0000 |
| Si | Si38 | 1.0 | 0.95492 | 0.47959 | 0.44867 | 1.0000 |
| Si | Si39 | 1.0 | 0.52066 | 0.14289 | 0.37450 | 1.0000 |
| Si | Si40 | 1.0 | 0.54211 | 0.33301 | 0.69369 | 1.0000 |
| Si | Si41 | 1.0 | 0.79605 | 0.72298 | 0.68892 | 1.0000 |
| Si | Si42 | 1.0 | 0.54316 | 0.71167 | 0.69538 | 1.0000 |
| Si | Si43 | 1.0 | 0.79608 | 0.96686 | 0.69925 | 1.0000 |
| Si | Si44 | 1.0 | 0.53869 | 0.95485 | 0.69525 | 1.0000 |

|    |      |     |         |         |         |        |
|----|------|-----|---------|---------|---------|--------|
| Si | Si45 | 1.0 | 0.21134 | 0.67266 | 0.19089 | 1.0000 |
| Si | Si46 | 1.0 | 0.46584 | 0.67102 | 0.19284 | 1.0000 |
| Si | Si47 | 1.0 | 0.20330 | 0.28771 | 0.19537 | 1.0000 |
| Si | Si48 | 1.0 | 0.45849 | 0.29053 | 0.19354 | 1.0000 |
| Si | Si49 | 1.0 | 0.20463 | 0.03975 | 0.19461 | 1.0000 |
| Si | Si50 | 1.0 | 0.46154 | 0.04448 | 0.19580 | 1.0000 |
| Si | Si51 | 1.0 | 0.14574 | 0.46954 | 0.12404 | 1.0000 |
| Si | Si52 | 1.0 | 0.13784 | 0.86151 | 0.12204 | 1.0000 |
| Si | Si53 | 1.0 | 0.52589 | 0.47190 | 0.12368 | 1.0000 |
| Si | Si54 | 1.0 | 0.84631 | 0.15361 | 0.62353 | 1.0000 |
| Si | Si55 | 1.0 | 0.47156 | 0.52875 | 0.62849 | 1.0000 |
| Si | Si56 | 1.0 | 0.15059 | 0.13821 | 0.37744 | 1.0000 |
| Si | Si57 | 1.0 | 0.53124 | 0.53014 | 0.37591 | 1.0000 |
| Si | Si58 | 1.0 | 0.86667 | 0.84441 | 0.87306 | 1.0000 |
| Si | Si59 | 1.0 | 0.46974 | 0.46163 | 0.87609 | 1.0000 |
| Si | Si60 | 1.0 | 0.79718 | 0.33976 | 0.70139 | 1.0000 |
| Si | Si61 | 1.0 | 0.21367 | 0.70042 | 0.30597 | 1.0000 |



T2T7T7:

data\_image0

\_chemical\_formula\_structural H3O128Al3Si61  
\_chemical\_formula\_sum "H3 O128 Al3 Si61"  
\_cell\_length\_a 12.5517  
\_cell\_length\_b 12.5326  
\_cell\_length\_c 26.4399  
\_cell\_angle\_alpha 90.0138  
\_cell\_angle\_beta 90.1029  
\_cell\_angle\_gamma 90.4138

\_space\_group\_name\_H-M\_alt "P 1"

\_space\_group\_IT\_number 1

loop\_

\_space\_group\_symop\_operation\_xyz

'x, y, z'

loop\_

\_atom\_site\_type\_symbol

\_atom\_site\_label

\_atom\_site\_symmetry\_multiplicity

\_atom\_site\_fract\_x

\_atom\_site\_fract\_y

\_atom\_site\_fract\_z

\_atom\_site\_occupancy

|   |    |     |         |         |         |        |
|---|----|-----|---------|---------|---------|--------|
| H | H1 | 1.0 | 0.48456 | 0.14597 | 0.53213 | 1.0000 |
| H | H2 | 1.0 | 0.85195 | 0.51654 | 0.71708 | 1.0000 |
| H | H3 | 1.0 | 0.56320 | 0.83230 | 0.34753 | 1.0000 |
| O | O1 | 1.0 | 0.29862 | 0.65762 | 0.06227 | 1.0000 |
| O | O2 | 1.0 | 0.34495 | 0.81695 | 0.99844 | 1.0000 |
| O | O3 | 1.0 | 0.23279 | 0.85399 | 0.08065 | 1.0000 |
| O | O4 | 1.0 | 0.44051 | 0.80752 | 0.08590 | 1.0000 |
| O | O5 | 1.0 | 0.33969 | 0.50399 | 0.99485 | 1.0000 |

|   |     |     |         |         |         |        |
|---|-----|-----|---------|---------|---------|--------|
| O | O6  | 1.0 | 0.23371 | 0.45994 | 0.07879 | 1.0000 |
| O | O7  | 1.0 | 0.44205 | 0.50508 | 0.08071 | 1.0000 |
| O | O8  | 1.0 | 0.69887 | 0.67150 | 0.06382 | 1.0000 |
| O | O9  | 1.0 | 0.83239 | 0.83689 | 0.05936 | 1.0000 |
| O | O10 | 1.0 | 0.64214 | 0.86235 | 0.09685 | 1.0000 |
| O | O11 | 1.0 | 0.83392 | 0.50728 | 0.06494 | 1.0000 |
| O | O12 | 1.0 | 0.64485 | 0.48668 | 0.10423 | 1.0000 |
| O | O13 | 1.0 | 0.96728 | 0.67206 | 0.05687 | 1.0000 |
| O | O14 | 1.0 | 0.02344 | 0.85501 | 0.09800 | 1.0000 |
| O | O15 | 1.0 | 0.02844 | 0.49172 | 0.09922 | 1.0000 |
| O | O16 | 1.0 | 0.63782 | 0.33133 | 0.55260 | 1.0000 |
| O | O17 | 1.0 | 0.68854 | 0.17037 | 0.49087 | 1.0000 |
| O | O18 | 1.0 | 0.73898 | 0.15805 | 0.58902 | 1.0000 |
| O | O19 | 1.0 | 0.53841 | 0.14486 | 0.55972 | 1.0000 |
| O | O20 | 1.0 | 0.67911 | 0.50812 | 0.50066 | 1.0000 |
| O | O21 | 1.0 | 0.77278 | 0.47261 | 0.59041 | 1.0000 |
| O | O22 | 1.0 | 0.56400 | 0.51741 | 0.58237 | 1.0000 |
| O | O23 | 1.0 | 0.28400 | 0.32886 | 0.56799 | 1.0000 |
| O | O24 | 1.0 | 0.15358 | 0.15877 | 0.55814 | 1.0000 |
| O | O25 | 1.0 | 0.33716 | 0.14296 | 0.60697 | 1.0000 |
| O | O26 | 1.0 | 0.17214 | 0.50232 | 0.55167 | 1.0000 |
| O | O27 | 1.0 | 0.35550 | 0.51664 | 0.60103 | 1.0000 |
| O | O28 | 1.0 | 0.03899 | 0.33376 | 0.55386 | 1.0000 |
| O | O29 | 1.0 | 0.95296 | 0.15578 | 0.59111 | 1.0000 |
| O | O30 | 1.0 | 0.99872 | 0.50528 | 0.60860 | 1.0000 |
| O | O31 | 1.0 | 0.34209 | 0.37676 | 0.31145 | 1.0000 |
| O | O32 | 1.0 | 0.17396 | 0.34120 | 0.25198 | 1.0000 |
| O | O33 | 1.0 | 0.20576 | 0.21869 | 0.33233 | 1.0000 |
| O | O34 | 1.0 | 0.14706 | 0.42177 | 0.34316 | 1.0000 |
| O | O35 | 1.0 | 0.49551 | 0.33159 | 0.24431 | 1.0000 |
| O | O36 | 1.0 | 0.48611 | 0.22866 | 0.33172 | 1.0000 |
| O | O37 | 1.0 | 0.54220 | 0.43543 | 0.32738 | 1.0000 |
| O | O38 | 1.0 | 0.32938 | 0.72181 | 0.31081 | 1.0000 |
| O | O39 | 1.0 | 0.14835 | 0.82887 | 0.31044 | 1.0000 |

|   |     |     |         |         |         |        |
|---|-----|-----|---------|---------|---------|--------|
| O | O40 | 1.0 | 0.15484 | 0.63481 | 0.34719 | 1.0000 |
| O | O41 | 1.0 | 0.49526 | 0.63260 | 0.35720 | 1.0000 |
| O | O42 | 1.0 | 0.31806 | 0.95868 | 0.31008 | 1.0000 |
| O | O43 | 1.0 | 0.13387 | 0.02180 | 0.34863 | 1.0000 |
| O | O44 | 1.0 | 0.51425 | 0.02721 | 0.35720 | 1.0000 |
| O | O45 | 1.0 | 0.67450 | 0.67837 | 0.81534 | 1.0000 |
| O | O46 | 1.0 | 0.82199 | 0.65352 | 0.74153 | 1.0000 |
| O | O47 | 1.0 | 0.86594 | 0.76144 | 0.82578 | 1.0000 |
| O | O48 | 1.0 | 0.84105 | 0.54822 | 0.82481 | 1.0000 |
| O | O49 | 1.0 | 0.52381 | 0.64556 | 0.74671 | 1.0000 |
| O | O50 | 1.0 | 0.48289 | 0.75874 | 0.82992 | 1.0000 |
| O | O51 | 1.0 | 0.50865 | 0.55002 | 0.83390 | 1.0000 |
| O | O52 | 1.0 | 0.65984 | 0.31921 | 0.81347 | 1.0000 |
| O | O53 | 1.0 | 0.79780 | 0.15860 | 0.82663 | 1.0000 |
| O | O54 | 1.0 | 0.84516 | 0.35077 | 0.85816 | 1.0000 |
| O | O55 | 1.0 | 0.51760 | 0.16097 | 0.81716 | 1.0000 |
| O | O56 | 1.0 | 0.46527 | 0.34743 | 0.84829 | 1.0000 |
| O | O57 | 1.0 | 0.65648 | 0.00204 | 0.80869 | 1.0000 |
| O | O58 | 1.0 | 0.83931 | 0.96359 | 0.85353 | 1.0000 |
| O | O59 | 1.0 | 0.46258 | 0.96777 | 0.84080 | 1.0000 |
| O | O60 | 1.0 | 0.62780 | 0.66055 | 0.93768 | 1.0000 |
| O | O61 | 1.0 | 0.66346 | 0.82768 | 0.99808 | 1.0000 |
| O | O62 | 1.0 | 0.77844 | 0.80370 | 0.91524 | 1.0000 |
| O | O63 | 1.0 | 0.57246 | 0.85545 | 0.90924 | 1.0000 |
| O | O64 | 1.0 | 0.66452 | 0.50427 | 0.00441 | 1.0000 |
| O | O65 | 1.0 | 0.76457 | 0.50628 | 0.91667 | 1.0000 |
| O | O66 | 1.0 | 0.55561 | 0.46363 | 0.92215 | 1.0000 |
| O | O67 | 1.0 | 0.28650 | 0.66442 | 0.93444 | 1.0000 |
| O | O68 | 1.0 | 0.17031 | 0.83914 | 0.94142 | 1.0000 |
| O | O69 | 1.0 | 0.36006 | 0.84666 | 0.90037 | 1.0000 |
| O | O70 | 1.0 | 0.16192 | 0.49423 | 0.93922 | 1.0000 |
| O | O71 | 1.0 | 0.35099 | 0.48414 | 0.89562 | 1.0000 |
| O | O72 | 1.0 | 0.04069 | 0.66904 | 0.94330 | 1.0000 |
| O | O73 | 1.0 | 0.98232 | 0.84827 | 0.89847 | 1.0000 |

|   |      |     |         |         |         |        |
|---|------|-----|---------|---------|---------|--------|
| O | O74  | 1.0 | 0.97136 | 0.49213 | 0.89968 | 1.0000 |
| O | O75  | 1.0 | 0.30421 | 0.32152 | 0.43842 | 1.0000 |
| O | O76  | 1.0 | 0.34094 | 0.16986 | 0.50845 | 1.0000 |
| O | O77  | 1.0 | 0.24303 | 0.12428 | 0.42061 | 1.0000 |
| O | O78  | 1.0 | 0.45329 | 0.17044 | 0.42724 | 1.0000 |
| O | O79  | 1.0 | 0.35508 | 0.47625 | 0.50343 | 1.0000 |
| O | O80  | 1.0 | 0.25333 | 0.52113 | 0.41715 | 1.0000 |
| O | O81  | 1.0 | 0.45617 | 0.46427 | 0.41766 | 1.0000 |
| O | O82  | 1.0 | 0.71166 | 0.34783 | 0.43768 | 1.0000 |
| O | O83  | 1.0 | 0.84435 | 0.18439 | 0.42308 | 1.0000 |
| O | O84  | 1.0 | 0.64826 | 0.17197 | 0.39151 | 1.0000 |
| O | O85  | 1.0 | 0.84172 | 0.51712 | 0.43541 | 1.0000 |
| O | O86  | 1.0 | 0.65074 | 0.53490 | 0.40121 | 1.0000 |
| O | O87  | 1.0 | 0.97079 | 0.34971 | 0.44316 | 1.0000 |
| O | O88  | 1.0 | 0.04488 | 0.18105 | 0.39585 | 1.0000 |
| O | O89  | 1.0 | 0.04213 | 0.53560 | 0.41197 | 1.0000 |
| O | O90  | 1.0 | 0.67286 | 0.35891 | 0.69725 | 1.0000 |
| O | O91  | 1.0 | 0.83564 | 0.31121 | 0.75891 | 1.0000 |
| O | O92  | 1.0 | 0.84625 | 0.25930 | 0.66129 | 1.0000 |
| O | O93  | 1.0 | 0.49714 | 0.31764 | 0.74930 | 1.0000 |
| O | O94  | 1.0 | 0.52742 | 0.23144 | 0.65770 | 1.0000 |
| O | O95  | 1.0 | 0.48901 | 0.44075 | 0.66967 | 1.0000 |
| O | O96  | 1.0 | 0.66854 | 0.71947 | 0.68115 | 1.0000 |
| O | O97  | 1.0 | 0.84079 | 0.84532 | 0.69489 | 1.0000 |
| O | O98  | 1.0 | 0.85461 | 0.66340 | 0.64360 | 1.0000 |
| O | O99  | 1.0 | 0.49717 | 0.83123 | 0.70066 | 1.0000 |
| O | O100 | 1.0 | 0.48002 | 0.64874 | 0.64964 | 1.0000 |
| O | O101 | 1.0 | 0.66781 | 0.96200 | 0.69665 | 1.0000 |
| O | O102 | 1.0 | 0.84401 | 0.04426 | 0.65683 | 1.0000 |
| O | O103 | 1.0 | 0.49636 | 0.00364 | 0.64301 | 1.0000 |
| O | O104 | 1.0 | 0.34294 | 0.68821 | 0.18808 | 1.0000 |
| O | O105 | 1.0 | 0.17595 | 0.65988 | 0.24911 | 1.0000 |
| O | O106 | 1.0 | 0.15621 | 0.77372 | 0.16616 | 1.0000 |
| O | O107 | 1.0 | 0.17996 | 0.56252 | 0.16214 | 1.0000 |

|    |      |     |         |         |         |        |
|----|------|-----|---------|---------|---------|--------|
| O  | O108 | 1.0 | 0.49764 | 0.66378 | 0.25686 | 1.0000 |
| O  | O109 | 1.0 | 0.53705 | 0.76634 | 0.17198 | 1.0000 |
| O  | O110 | 1.0 | 0.50538 | 0.55460 | 0.17339 | 1.0000 |
| O  | O111 | 1.0 | 0.32696 | 0.29759 | 0.18603 | 1.0000 |
| O  | O112 | 1.0 | 0.15880 | 0.16795 | 0.19377 | 1.0000 |
| O  | O113 | 1.0 | 0.13618 | 0.35688 | 0.15376 | 1.0000 |
| O  | O114 | 1.0 | 0.49158 | 0.16197 | 0.18372 | 1.0000 |
| O  | O115 | 1.0 | 0.50951 | 0.35310 | 0.14467 | 1.0000 |
| O  | O116 | 1.0 | 0.32450 | 0.03475 | 0.19401 | 1.0000 |
| O  | O117 | 1.0 | 0.14474 | 0.98267 | 0.14888 | 1.0000 |
| O  | O118 | 1.0 | 0.49703 | 0.96903 | 0.14649 | 1.0000 |
| O  | O119 | 1.0 | 0.99803 | 0.84099 | 0.99833 | 1.0000 |
| O  | O120 | 1.0 | 0.99396 | 0.50029 | 0.99978 | 1.0000 |
| O  | O121 | 1.0 | 0.99320 | 0.16913 | 0.49373 | 1.0000 |
| O  | O122 | 1.0 | 0.98437 | 0.51168 | 0.50820 | 1.0000 |
| O  | O123 | 1.0 | 0.15130 | 0.99381 | 0.24922 | 1.0000 |
| O  | O124 | 1.0 | 0.49998 | 0.99424 | 0.24674 | 1.0000 |
| O  | O125 | 1.0 | 0.83363 | 0.01460 | 0.75499 | 1.0000 |
| O  | O126 | 1.0 | 0.49366 | 0.02016 | 0.74386 | 1.0000 |
| O  | O127 | 1.0 | 0.85638 | 0.46182 | 0.68983 | 1.0000 |
| O  | O128 | 1.0 | 0.50682 | 0.82764 | 0.32215 | 1.0000 |
| Al | Al1  | 1.0 | 0.46863 | 0.13024 | 0.62353 | 1.0000 |
| Al | Al2  | 1.0 | 0.87095 | 0.53233 | 0.62640 | 1.0000 |
| Al | Al3  | 1.0 | 0.45357 | 0.96572 | 0.30637 | 1.0000 |
| Si | Si1  | 1.0 | 0.32932 | 0.78429 | 0.05731 | 1.0000 |
| Si | Si2  | 1.0 | 0.32898 | 0.53188 | 0.05451 | 1.0000 |
| Si | Si3  | 1.0 | 0.70921 | 0.79915 | 0.05414 | 1.0000 |
| Si | Si4  | 1.0 | 0.71080 | 0.54310 | 0.05892 | 1.0000 |
| Si | Si5  | 1.0 | 0.95508 | 0.80058 | 0.05300 | 1.0000 |
| Si | Si6  | 1.0 | 0.95622 | 0.54325 | 0.05497 | 1.0000 |
| Si | Si7  | 1.0 | 0.52853 | 0.85265 | 0.12570 | 1.0000 |
| Si | Si8  | 1.0 | 0.65733 | 0.20539 | 0.54779 | 1.0000 |
| Si | Si9  | 1.0 | 0.66641 | 0.45936 | 0.55767 | 1.0000 |
| Si | Si10 | 1.0 | 0.27649 | 0.20008 | 0.56178 | 1.0000 |

|    |      |     |         |         |         |        |
|----|------|-----|---------|---------|---------|--------|
| Si | Si11 | 1.0 | 0.29131 | 0.45563 | 0.55647 | 1.0000 |
| Si | Si12 | 1.0 | 0.03462 | 0.20561 | 0.54962 | 1.0000 |
| Si | Si13 | 1.0 | 0.04849 | 0.46349 | 0.55700 | 1.0000 |
| Si | Si14 | 1.0 | 0.21690 | 0.33905 | 0.30991 | 1.0000 |
| Si | Si15 | 1.0 | 0.46641 | 0.34157 | 0.30365 | 1.0000 |
| Si | Si16 | 1.0 | 0.20035 | 0.71233 | 0.30411 | 1.0000 |
| Si | Si17 | 1.0 | 0.19133 | 0.95184 | 0.30442 | 1.0000 |
| Si | Si18 | 1.0 | 0.15021 | 0.52637 | 0.37973 | 1.0000 |
| Si | Si19 | 1.0 | 0.79978 | 0.66135 | 0.80244 | 1.0000 |
| Si | Si20 | 1.0 | 0.54690 | 0.65855 | 0.80661 | 1.0000 |
| Si | Si21 | 1.0 | 0.78387 | 0.28385 | 0.81436 | 1.0000 |
| Si | Si22 | 1.0 | 0.53466 | 0.28618 | 0.80602 | 1.0000 |
| Si | Si23 | 1.0 | 0.78178 | 0.03469 | 0.81055 | 1.0000 |
| Si | Si24 | 1.0 | 0.53259 | 0.03781 | 0.80174 | 1.0000 |
| Si | Si25 | 1.0 | 0.85440 | 0.47482 | 0.87544 | 1.0000 |
| Si | Si26 | 1.0 | 0.66060 | 0.78686 | 0.93977 | 1.0000 |
| Si | Si27 | 1.0 | 0.65348 | 0.53392 | 0.94502 | 1.0000 |
| Si | Si28 | 1.0 | 0.29000 | 0.79166 | 0.94396 | 1.0000 |
| Si | Si29 | 1.0 | 0.28439 | 0.53650 | 0.94135 | 1.0000 |
| Si | Si30 | 1.0 | 0.04785 | 0.79836 | 0.94552 | 1.0000 |
| Si | Si31 | 1.0 | 0.04201 | 0.53981 | 0.94578 | 1.0000 |
| Si | Si32 | 1.0 | 0.47135 | 0.85564 | 0.87037 | 1.0000 |
| Si | Si33 | 1.0 | 0.33455 | 0.19641 | 0.44788 | 1.0000 |
| Si | Si34 | 1.0 | 0.34131 | 0.44628 | 0.44428 | 1.0000 |
| Si | Si35 | 1.0 | 0.72332 | 0.21943 | 0.43568 | 1.0000 |
| Si | Si36 | 1.0 | 0.72085 | 0.47625 | 0.44473 | 1.0000 |
| Si | Si37 | 1.0 | 0.96422 | 0.22115 | 0.43914 | 1.0000 |
| Si | Si38 | 1.0 | 0.96038 | 0.47769 | 0.45025 | 1.0000 |
| Si | Si39 | 1.0 | 0.52489 | 0.14778 | 0.37643 | 1.0000 |
| Si | Si40 | 1.0 | 0.54425 | 0.33444 | 0.69235 | 1.0000 |
| Si | Si41 | 1.0 | 0.79682 | 0.72328 | 0.68881 | 1.0000 |
| Si | Si42 | 1.0 | 0.54253 | 0.71169 | 0.69429 | 1.0000 |
| Si | Si43 | 1.0 | 0.79570 | 0.96620 | 0.70044 | 1.0000 |
| Si | Si44 | 1.0 | 0.53811 | 0.95430 | 0.69474 | 1.0000 |

|    |      |     |         |         |         |        |
|----|------|-----|---------|---------|---------|--------|
| Si | Si45 | 1.0 | 0.21390 | 0.67101 | 0.19067 | 1.0000 |
| Si | Si46 | 1.0 | 0.46976 | 0.66819 | 0.19636 | 1.0000 |
| Si | Si47 | 1.0 | 0.19975 | 0.29024 | 0.19659 | 1.0000 |
| Si | Si48 | 1.0 | 0.45533 | 0.28459 | 0.18995 | 1.0000 |
| Si | Si49 | 1.0 | 0.19636 | 0.04462 | 0.19699 | 1.0000 |
| Si | Si50 | 1.0 | 0.45420 | 0.03900 | 0.19416 | 1.0000 |
| Si | Si51 | 1.0 | 0.14442 | 0.46856 | 0.12332 | 1.0000 |
| Si | Si52 | 1.0 | 0.14029 | 0.86566 | 0.12339 | 1.0000 |
| Si | Si53 | 1.0 | 0.52466 | 0.47490 | 0.12568 | 1.0000 |
| Si | Si54 | 1.0 | 0.84571 | 0.15397 | 0.62467 | 1.0000 |
| Si | Si55 | 1.0 | 0.47335 | 0.52956 | 0.62567 | 1.0000 |
| Si | Si56 | 1.0 | 0.15664 | 0.13670 | 0.37446 | 1.0000 |
| Si | Si57 | 1.0 | 0.53536 | 0.51510 | 0.37575 | 1.0000 |
| Si | Si58 | 1.0 | 0.86471 | 0.84448 | 0.87339 | 1.0000 |
| Si | Si59 | 1.0 | 0.47054 | 0.46282 | 0.87544 | 1.0000 |
| Si | Si60 | 1.0 | 0.79882 | 0.34166 | 0.70209 | 1.0000 |
| Si | Si61 | 1.0 | 0.45466 | 0.70409 | 0.31079 | 1.0000 |

T2T7T9:

data\_image0

\_chemical\_formula\_structural H3O128Al3Si61  
\_chemical\_formula\_sum "H3 O128 Al3 Si61"  
\_cell\_length\_a 12.5511  
\_cell\_length\_b 12.5779  
\_cell\_length\_c 26.5121  
\_cell\_angle\_alpha 89.8346  
\_cell\_angle\_beta 90.1892  
\_cell\_angle\_gamma 90.3142

\_space\_group\_name\_H-M\_alt "P 1"  
\_space\_group\_IT\_number 1

loop\_

\_space\_group\_symop\_operation\_xyz  
'x, y, z'

loop\_

\_atom\_site\_type\_symbol  
\_atom\_site\_label  
\_atom\_site\_symmetry\_multiplicity  
\_atom\_site\_fract\_x  
\_atom\_site\_fract\_y  
\_atom\_site\_fract\_z  
\_atom\_site\_occupancy  
H H1 1.0 0.48034 0.15996 0.53838 1.0000  
H H2 1.0 0.06427 0.97463 0.36067 1.0000  
H H3 1.0 0.55640 0.16284 0.15387 1.0000  
O O1 1.0 0.30683 0.66575 0.06533 1.0000  
O O2 1.0 0.34509 0.81617 0.99652 1.0000  
O O3 1.0 0.23262 0.85899 0.07895 1.0000  
O O4 1.0 0.44208 0.82592 0.08370 1.0000  
O O5 1.0 0.34893 0.52101 0.99417 1.0000



|   |     |     |         |         |         |        |
|---|-----|-----|---------|---------|---------|--------|
| O | O6  | 1.0 | 0.24062 | 0.46657 | 0.07530 | 1.0000 |
| O | O7  | 1.0 | 0.44820 | 0.51214 | 0.08128 | 1.0000 |
| O | O8  | 1.0 | 0.70789 | 0.66937 | 0.06646 | 1.0000 |
| O | O9  | 1.0 | 0.83528 | 0.83712 | 0.05606 | 1.0000 |
| O | O10 | 1.0 | 0.64827 | 0.86060 | 0.09640 | 1.0000 |
| O | O11 | 1.0 | 0.83884 | 0.50304 | 0.06546 | 1.0000 |
| O | O12 | 1.0 | 0.64990 | 0.48767 | 0.10730 | 1.0000 |
| O | O13 | 1.0 | 0.96737 | 0.67107 | 0.05616 | 1.0000 |
| O | O14 | 1.0 | 0.02359 | 0.85262 | 0.09787 | 1.0000 |
| O | O15 | 1.0 | 0.03461 | 0.49194 | 0.09752 | 1.0000 |
| O | O16 | 1.0 | 0.67057 | 0.32666 | 0.56133 | 1.0000 |
| O | O17 | 1.0 | 0.66748 | 0.17185 | 0.49136 | 1.0000 |
| O | O18 | 1.0 | 0.74277 | 0.13552 | 0.58421 | 1.0000 |
| O | O19 | 1.0 | 0.53467 | 0.16020 | 0.56600 | 1.0000 |
| O | O20 | 1.0 | 0.66395 | 0.49296 | 0.49987 | 1.0000 |
| O | O21 | 1.0 | 0.77122 | 0.50436 | 0.58561 | 1.0000 |
| O | O22 | 1.0 | 0.55811 | 0.49827 | 0.58421 | 1.0000 |
| O | O23 | 1.0 | 0.28016 | 0.33768 | 0.56767 | 1.0000 |
| O | O24 | 1.0 | 0.15116 | 0.17000 | 0.55948 | 1.0000 |
| O | O25 | 1.0 | 0.33475 | 0.15525 | 0.61077 | 1.0000 |
| O | O26 | 1.0 | 0.16552 | 0.51029 | 0.55443 | 1.0000 |
| O | O27 | 1.0 | 0.35159 | 0.52375 | 0.59958 | 1.0000 |
| O | O28 | 1.0 | 0.03080 | 0.34239 | 0.55587 | 1.0000 |
| O | O29 | 1.0 | 0.95340 | 0.16778 | 0.59774 | 1.0000 |
| O | O30 | 1.0 | 0.98114 | 0.52639 | 0.59761 | 1.0000 |
| O | O31 | 1.0 | 0.33651 | 0.37324 | 0.30867 | 1.0000 |
| O | O32 | 1.0 | 0.17279 | 0.34249 | 0.24696 | 1.0000 |
| O | O33 | 1.0 | 0.19727 | 0.21614 | 0.32747 | 1.0000 |
| O | O34 | 1.0 | 0.14154 | 0.42053 | 0.33707 | 1.0000 |
| O | O35 | 1.0 | 0.49526 | 0.33038 | 0.24532 | 1.0000 |
| O | O36 | 1.0 | 0.48621 | 0.23129 | 0.33259 | 1.0000 |
| O | O37 | 1.0 | 0.53251 | 0.44039 | 0.32717 | 1.0000 |
| O | O38 | 1.0 | 0.32616 | 0.71024 | 0.30902 | 1.0000 |
| O | O39 | 1.0 | 0.15015 | 0.82353 | 0.30611 | 1.0000 |

|   |     |     |         |         |         |        |
|---|-----|-----|---------|---------|---------|--------|
| O | O40 | 1.0 | 0.14549 | 0.63277 | 0.34470 | 1.0000 |
| O | O41 | 1.0 | 0.48982 | 0.83877 | 0.32190 | 1.0000 |
| O | O42 | 1.0 | 0.49700 | 0.64160 | 0.35532 | 1.0000 |
| O | O43 | 1.0 | 0.31754 | 0.96032 | 0.31093 | 1.0000 |
| O | O44 | 1.0 | 0.48485 | 0.02984 | 0.36123 | 1.0000 |
| O | O45 | 1.0 | 0.66528 | 0.68710 | 0.81673 | 1.0000 |
| O | O46 | 1.0 | 0.81876 | 0.65502 | 0.74853 | 1.0000 |
| O | O47 | 1.0 | 0.85868 | 0.76239 | 0.83166 | 1.0000 |
| O | O48 | 1.0 | 0.82452 | 0.55330 | 0.83487 | 1.0000 |
| O | O49 | 1.0 | 0.51925 | 0.64617 | 0.74583 | 1.0000 |
| O | O50 | 1.0 | 0.47074 | 0.76165 | 0.82653 | 1.0000 |
| O | O51 | 1.0 | 0.50325 | 0.55312 | 0.83330 | 1.0000 |
| O | O52 | 1.0 | 0.67378 | 0.29464 | 0.81785 | 1.0000 |
| O | O53 | 1.0 | 0.84011 | 0.16293 | 0.81225 | 1.0000 |
| O | O54 | 1.0 | 0.86339 | 0.35062 | 0.85213 | 1.0000 |
| O | O55 | 1.0 | 0.50777 | 0.16218 | 0.81261 | 1.0000 |
| O | O56 | 1.0 | 0.48578 | 0.34793 | 0.85371 | 1.0000 |
| O | O57 | 1.0 | 0.67369 | 0.03174 | 0.80470 | 1.0000 |
| O | O58 | 1.0 | 0.85283 | 0.97116 | 0.84827 | 1.0000 |
| O | O59 | 1.0 | 0.49525 | 0.96835 | 0.84627 | 1.0000 |
| O | O60 | 1.0 | 0.68179 | 0.65426 | 0.93699 | 1.0000 |
| O | O61 | 1.0 | 0.66017 | 0.81853 | 0.99911 | 1.0000 |
| O | O62 | 1.0 | 0.77692 | 0.83725 | 0.91725 | 1.0000 |
| O | O63 | 1.0 | 0.56520 | 0.82227 | 0.91141 | 1.0000 |
| O | O64 | 1.0 | 0.66516 | 0.50308 | 0.00759 | 1.0000 |
| O | O65 | 1.0 | 0.77232 | 0.46808 | 0.92342 | 1.0000 |
| O | O66 | 1.0 | 0.55940 | 0.48192 | 0.92356 | 1.0000 |
| O | O67 | 1.0 | 0.29729 | 0.66956 | 0.92743 | 1.0000 |
| O | O68 | 1.0 | 0.17281 | 0.83835 | 0.93912 | 1.0000 |
| O | O69 | 1.0 | 0.36063 | 0.85993 | 0.89871 | 1.0000 |
| O | O70 | 1.0 | 0.16849 | 0.50289 | 0.94053 | 1.0000 |
| O | O71 | 1.0 | 0.35544 | 0.47916 | 0.89690 | 1.0000 |
| O | O72 | 1.0 | 0.04051 | 0.67124 | 0.94183 | 1.0000 |
| O | O73 | 1.0 | 0.98390 | 0.85379 | 0.89913 | 1.0000 |

|   |      |     |         |         |         |        |
|---|------|-----|---------|---------|---------|--------|
| O | O74  | 1.0 | 0.97706 | 0.49258 | 0.89929 | 1.0000 |
| O | O75  | 1.0 | 0.29879 | 0.32407 | 0.44107 | 1.0000 |
| O | O76  | 1.0 | 0.34386 | 0.17732 | 0.51242 | 1.0000 |
| O | O77  | 1.0 | 0.24955 | 0.12286 | 0.42457 | 1.0000 |
| O | O78  | 1.0 | 0.45423 | 0.18297 | 0.42987 | 1.0000 |
| O | O79  | 1.0 | 0.34286 | 0.48658 | 0.50166 | 1.0000 |
| O | O80  | 1.0 | 0.22764 | 0.51479 | 0.41802 | 1.0000 |
| O | O81  | 1.0 | 0.43557 | 0.47709 | 0.41346 | 1.0000 |
| O | O82  | 1.0 | 0.69294 | 0.33976 | 0.43243 | 1.0000 |
| O | O83  | 1.0 | 0.83214 | 0.17870 | 0.42924 | 1.0000 |
| O | O84  | 1.0 | 0.64217 | 0.15467 | 0.39149 | 1.0000 |
| O | O85  | 1.0 | 0.82857 | 0.50328 | 0.43687 | 1.0000 |
| O | O86  | 1.0 | 0.63808 | 0.53233 | 0.40265 | 1.0000 |
| O | O87  | 1.0 | 0.96619 | 0.34155 | 0.44028 | 1.0000 |
| O | O88  | 1.0 | 0.02890 | 0.15858 | 0.40091 | 1.0000 |
| O | O89  | 1.0 | 0.01833 | 0.52630 | 0.39996 | 1.0000 |
| O | O90  | 1.0 | 0.67095 | 0.37657 | 0.68977 | 1.0000 |
| O | O91  | 1.0 | 0.83103 | 0.33344 | 0.75334 | 1.0000 |
| O | O92  | 1.0 | 0.81332 | 0.22517 | 0.66841 | 1.0000 |
| O | O93  | 1.0 | 0.86872 | 0.42973 | 0.66764 | 1.0000 |
| O | O94  | 1.0 | 0.51390 | 0.33587 | 0.75472 | 1.0000 |
| O | O95  | 1.0 | 0.52524 | 0.23153 | 0.66699 | 1.0000 |
| O | O96  | 1.0 | 0.47308 | 0.43770 | 0.67128 | 1.0000 |
| O | O97  | 1.0 | 0.67075 | 0.70547 | 0.68111 | 1.0000 |
| O | O98  | 1.0 | 0.84271 | 0.82971 | 0.69084 | 1.0000 |
| O | O99  | 1.0 | 0.85793 | 0.64019 | 0.65140 | 1.0000 |
| O | O100 | 1.0 | 0.50193 | 0.82749 | 0.69497 | 1.0000 |
| O | O101 | 1.0 | 0.48347 | 0.64424 | 0.64768 | 1.0000 |
| O | O102 | 1.0 | 0.67291 | 0.95431 | 0.69410 | 1.0000 |
| O | O103 | 1.0 | 0.85143 | 0.02131 | 0.64968 | 1.0000 |
| O | O104 | 1.0 | 0.49531 | 0.01024 | 0.64630 | 1.0000 |
| O | O105 | 1.0 | 0.34457 | 0.68756 | 0.18888 | 1.0000 |
| O | O106 | 1.0 | 0.17202 | 0.65522 | 0.24628 | 1.0000 |
| O | O107 | 1.0 | 0.15962 | 0.76987 | 0.16346 | 1.0000 |

|    |      |     |         |         |         |        |
|----|------|-----|---------|---------|---------|--------|
| O  | O108 | 1.0 | 0.18681 | 0.55858 | 0.16055 | 1.0000 |
| O  | O109 | 1.0 | 0.50146 | 0.67561 | 0.25664 | 1.0000 |
| O  | O110 | 1.0 | 0.53837 | 0.75898 | 0.16667 | 1.0000 |
| O  | O111 | 1.0 | 0.50580 | 0.55225 | 0.17657 | 1.0000 |
| O  | O112 | 1.0 | 0.32884 | 0.28398 | 0.18599 | 1.0000 |
| O  | O113 | 1.0 | 0.15143 | 0.16735 | 0.19091 | 1.0000 |
| O  | O114 | 1.0 | 0.14702 | 0.35397 | 0.14763 | 1.0000 |
| O  | O115 | 1.0 | 0.50887 | 0.35697 | 0.14442 | 1.0000 |
| O  | O116 | 1.0 | 0.32082 | 0.04039 | 0.19551 | 1.0000 |
| O  | O117 | 1.0 | 0.14218 | 0.97876 | 0.14990 | 1.0000 |
| O  | O118 | 1.0 | 0.51579 | 0.96725 | 0.15145 | 1.0000 |
| O  | O119 | 1.0 | 0.00556 | 0.84024 | 0.99853 | 1.0000 |
| O  | O120 | 1.0 | 0.99730 | 0.50208 | 0.99876 | 1.0000 |
| O  | O121 | 1.0 | 0.98180 | 0.17344 | 0.49949 | 1.0000 |
| O  | O122 | 1.0 | 0.99212 | 0.51114 | 0.49871 | 1.0000 |
| O  | O123 | 1.0 | 0.14893 | 0.99735 | 0.24959 | 1.0000 |
| O  | O124 | 1.0 | 0.49671 | 0.00746 | 0.26091 | 1.0000 |
| O  | O125 | 1.0 | 0.84516 | 0.00011 | 0.74888 | 1.0000 |
| O  | O126 | 1.0 | 0.50219 | 0.00447 | 0.74703 | 1.0000 |
| O  | O127 | 1.0 | 0.13126 | 0.00641 | 0.34953 | 1.0000 |
| O  | O128 | 1.0 | 0.50604 | 0.16850 | 0.18174 | 1.0000 |
| Al | Al1  | 1.0 | 0.46533 | 0.13780 | 0.62934 | 1.0000 |
| Al | Al2  | 1.0 | 0.15491 | 0.14089 | 0.37816 | 1.0000 |
| Al | Al3  | 1.0 | 0.45587 | 0.03241 | 0.20011 | 1.0000 |
| Si | Si1  | 1.0 | 0.33228 | 0.79243 | 0.05630 | 1.0000 |
| Si | Si2  | 1.0 | 0.33627 | 0.54187 | 0.05397 | 1.0000 |
| Si | Si3  | 1.0 | 0.71297 | 0.79589 | 0.05410 | 1.0000 |
| Si | Si4  | 1.0 | 0.71603 | 0.54157 | 0.06099 | 1.0000 |
| Si | Si5  | 1.0 | 0.95780 | 0.79941 | 0.05190 | 1.0000 |
| Si | Si6  | 1.0 | 0.95968 | 0.54260 | 0.05401 | 1.0000 |
| Si | Si7  | 1.0 | 0.53413 | 0.85501 | 0.12496 | 1.0000 |
| Si | Si8  | 1.0 | 0.65916 | 0.20108 | 0.55036 | 1.0000 |
| Si | Si9  | 1.0 | 0.66590 | 0.45663 | 0.55856 | 1.0000 |
| Si | Si10 | 1.0 | 0.27499 | 0.20884 | 0.56417 | 1.0000 |

|    |      |     |         |         |         |        |
|----|------|-----|---------|---------|---------|--------|
| Si | Si11 | 1.0 | 0.28534 | 0.46370 | 0.55587 | 1.0000 |
| Si | Si12 | 1.0 | 0.02984 | 0.21345 | 0.55325 | 1.0000 |
| Si | Si13 | 1.0 | 0.04291 | 0.47068 | 0.55168 | 1.0000 |
| Si | Si14 | 1.0 | 0.21129 | 0.33461 | 0.30586 | 1.0000 |
| Si | Si15 | 1.0 | 0.46173 | 0.34315 | 0.30463 | 1.0000 |
| Si | Si16 | 1.0 | 0.19915 | 0.70377 | 0.30143 | 1.0000 |
| Si | Si17 | 1.0 | 0.45474 | 0.71708 | 0.31036 | 1.0000 |
| Si | Si18 | 1.0 | 0.44917 | 0.96021 | 0.31241 | 1.0000 |
| Si | Si19 | 1.0 | 0.13517 | 0.52128 | 0.37491 | 1.0000 |
| Si | Si20 | 1.0 | 0.79161 | 0.66387 | 0.80803 | 1.0000 |
| Si | Si21 | 1.0 | 0.53952 | 0.66182 | 0.80567 | 1.0000 |
| Si | Si22 | 1.0 | 0.80106 | 0.28507 | 0.80842 | 1.0000 |
| Si | Si23 | 1.0 | 0.54586 | 0.28500 | 0.80885 | 1.0000 |
| Si | Si24 | 1.0 | 0.80220 | 0.04134 | 0.80309 | 1.0000 |
| Si | Si25 | 1.0 | 0.54505 | 0.04144 | 0.80190 | 1.0000 |
| Si | Si26 | 1.0 | 0.85873 | 0.46726 | 0.87758 | 1.0000 |
| Si | Si27 | 1.0 | 0.67058 | 0.78288 | 0.94052 | 1.0000 |
| Si | Si28 | 1.0 | 0.66936 | 0.52721 | 0.94730 | 1.0000 |
| Si | Si29 | 1.0 | 0.29394 | 0.79549 | 0.94082 | 1.0000 |
| Si | Si30 | 1.0 | 0.29155 | 0.54333 | 0.93986 | 1.0000 |
| Si | Si31 | 1.0 | 0.05038 | 0.79985 | 0.94456 | 1.0000 |
| Si | Si32 | 1.0 | 0.04601 | 0.54265 | 0.94508 | 1.0000 |
| Si | Si33 | 1.0 | 0.47431 | 0.85247 | 0.87021 | 1.0000 |
| Si | Si34 | 1.0 | 0.33372 | 0.20020 | 0.45133 | 1.0000 |
| Si | Si35 | 1.0 | 0.32645 | 0.45088 | 0.44340 | 1.0000 |
| Si | Si36 | 1.0 | 0.70959 | 0.21225 | 0.43614 | 1.0000 |
| Si | Si37 | 1.0 | 0.70638 | 0.46609 | 0.44364 | 1.0000 |
| Si | Si38 | 1.0 | 0.95456 | 0.21266 | 0.44208 | 1.0000 |
| Si | Si39 | 1.0 | 0.95135 | 0.46881 | 0.44434 | 1.0000 |
| Si | Si40 | 1.0 | 0.51559 | 0.14964 | 0.37828 | 1.0000 |
| Si | Si41 | 1.0 | 0.79479 | 0.34041 | 0.69470 | 1.0000 |
| Si | Si42 | 1.0 | 0.54484 | 0.34220 | 0.69514 | 1.0000 |
| Si | Si43 | 1.0 | 0.79700 | 0.70885 | 0.69353 | 1.0000 |
| Si | Si44 | 1.0 | 0.54396 | 0.70684 | 0.69266 | 1.0000 |

|    |      |     |         |         |         |        |
|----|------|-----|---------|---------|---------|--------|
| Si | Si45 | 1.0 | 0.80145 | 0.95152 | 0.69579 | 1.0000 |
| Si | Si46 | 1.0 | 0.54284 | 0.95059 | 0.69441 | 1.0000 |
| Si | Si47 | 1.0 | 0.86753 | 0.52442 | 0.62588 | 1.0000 |
| Si | Si48 | 1.0 | 0.21622 | 0.66783 | 0.18899 | 1.0000 |
| Si | Si49 | 1.0 | 0.47196 | 0.66929 | 0.19705 | 1.0000 |
| Si | Si50 | 1.0 | 0.19900 | 0.28679 | 0.19343 | 1.0000 |
| Si | Si51 | 1.0 | 0.19419 | 0.04588 | 0.19596 | 1.0000 |
| Si | Si52 | 1.0 | 0.15183 | 0.46884 | 0.11999 | 1.0000 |
| Si | Si53 | 1.0 | 0.14114 | 0.86439 | 0.12235 | 1.0000 |
| Si | Si54 | 1.0 | 0.52809 | 0.48056 | 0.12687 | 1.0000 |
| Si | Si55 | 1.0 | 0.84155 | 0.13895 | 0.62513 | 1.0000 |
| Si | Si56 | 1.0 | 0.46784 | 0.52490 | 0.62624 | 1.0000 |
| Si | Si57 | 1.0 | 0.52416 | 0.52278 | 0.37458 | 1.0000 |
| Si | Si58 | 1.0 | 0.86640 | 0.85557 | 0.87382 | 1.0000 |
| Si | Si59 | 1.0 | 0.47670 | 0.46628 | 0.87670 | 1.0000 |
| Si | Si60 | 1.0 | 0.19282 | 0.94435 | 0.30073 | 1.0000 |
| Si | Si61 | 1.0 | 0.45556 | 0.29262 | 0.19056 | 1.0000 |

T7T7T7:

data\_image0

\_chemical\_formula\_structural H3O128Al3Si61  
\_chemical\_formula\_sum "H3 O128 Al3 Si61"  
\_cell\_length\_a 12.5199  
\_cell\_length\_b 12.5931  
\_cell\_length\_c 26.4069  
\_cell\_angle\_alpha 89.8334  
\_cell\_angle\_beta 90.0384  
\_cell\_angle\_gamma 90.6074

\_space\_group\_name\_H-M\_alt "P 1"

\_space\_group\_IT\_number 1

loop\_

\_space\_group\_symop\_operation\_xyz

'x, y, z'

loop\_

\_atom\_site\_type\_symbol

\_atom\_site\_label

\_atom\_site\_symmetry\_multiplicity

\_atom\_site\_fract\_x

\_atom\_site\_fract\_y

\_atom\_site\_fract\_z

\_atom\_site\_occupancy

|   |    |     |         |         |         |        |
|---|----|-----|---------|---------|---------|--------|
| H | H1 | 1.0 | 0.48202 | 0.14652 | 0.53290 | 1.0000 |
| H | H2 | 1.0 | 0.85911 | 0.51611 | 0.71656 | 1.0000 |
| H | H3 | 1.0 | 0.51775 | 0.84244 | 0.03618 | 1.0000 |
| O | O1 | 1.0 | 0.32318 | 0.67339 | 0.05996 | 1.0000 |
| O | O2 | 1.0 | 0.33496 | 0.82709 | 0.98898 | 1.0000 |
| O | O3 | 1.0 | 0.25775 | 0.86735 | 0.08152 | 1.0000 |
| O | O4 | 1.0 | 0.32717 | 0.49759 | 0.00394 | 1.0000 |
| O | O5 | 1.0 | 0.25453 | 0.48719 | 0.09707 | 1.0000 |

|   |     |     |         |         |         |        |
|---|-----|-----|---------|---------|---------|--------|
| O | O6  | 1.0 | 0.45996 | 0.51907 | 0.07956 | 1.0000 |
| O | O7  | 1.0 | 0.72007 | 0.65747 | 0.06110 | 1.0000 |
| O | O8  | 1.0 | 0.85001 | 0.82493 | 0.05567 | 1.0000 |
| O | O9  | 1.0 | 0.66638 | 0.83783 | 0.10693 | 1.0000 |
| O | O10 | 1.0 | 0.84347 | 0.48831 | 0.06372 | 1.0000 |
| O | O11 | 1.0 | 0.65538 | 0.47503 | 0.10326 | 1.0000 |
| O | O12 | 1.0 | 0.97695 | 0.65588 | 0.05686 | 1.0000 |
| O | O13 | 1.0 | 0.04744 | 0.83650 | 0.09392 | 1.0000 |
| O | O14 | 1.0 | 0.04329 | 0.46918 | 0.08907 | 1.0000 |
| O | O15 | 1.0 | 0.63325 | 0.33084 | 0.55284 | 1.0000 |
| O | O16 | 1.0 | 0.68494 | 0.17259 | 0.49047 | 1.0000 |
| O | O17 | 1.0 | 0.73966 | 0.15989 | 0.58800 | 1.0000 |
| O | O18 | 1.0 | 0.53701 | 0.14239 | 0.56014 | 1.0000 |
| O | O19 | 1.0 | 0.67997 | 0.50587 | 0.50027 | 1.0000 |
| O | O20 | 1.0 | 0.76707 | 0.47174 | 0.59135 | 1.0000 |
| O | O21 | 1.0 | 0.55910 | 0.51796 | 0.58032 | 1.0000 |
| O | O22 | 1.0 | 0.28071 | 0.33180 | 0.57011 | 1.0000 |
| O | O23 | 1.0 | 0.15194 | 0.16380 | 0.55463 | 1.0000 |
| O | O24 | 1.0 | 0.33428 | 0.14428 | 0.60620 | 1.0000 |
| O | O25 | 1.0 | 0.16793 | 0.50168 | 0.54982 | 1.0000 |
| O | O26 | 1.0 | 0.35053 | 0.52085 | 0.60080 | 1.0000 |
| O | O27 | 1.0 | 0.03213 | 0.33533 | 0.55615 | 1.0000 |
| O | O28 | 1.0 | 0.95428 | 0.15460 | 0.59383 | 1.0000 |
| O | O29 | 1.0 | 0.99380 | 0.51282 | 0.60599 | 1.0000 |
| O | O30 | 1.0 | 0.33896 | 0.38155 | 0.31116 | 1.0000 |
| O | O31 | 1.0 | 0.16908 | 0.33402 | 0.25364 | 1.0000 |
| O | O32 | 1.0 | 0.20048 | 0.23023 | 0.33864 | 1.0000 |
| O | O33 | 1.0 | 0.14405 | 0.43429 | 0.34006 | 1.0000 |
| O | O34 | 1.0 | 0.49662 | 0.34650 | 0.24483 | 1.0000 |
| O | O35 | 1.0 | 0.48910 | 0.24094 | 0.33200 | 1.0000 |
| O | O36 | 1.0 | 0.53747 | 0.44862 | 0.32840 | 1.0000 |
| O | O37 | 1.0 | 0.33032 | 0.71869 | 0.30702 | 1.0000 |
| O | O38 | 1.0 | 0.15781 | 0.83673 | 0.31410 | 1.0000 |
| O | O39 | 1.0 | 0.15762 | 0.64487 | 0.35130 | 1.0000 |



|   |     |     |         |         |         |        |
|---|-----|-----|---------|---------|---------|--------|
| O | O40 | 1.0 | 0.50144 | 0.84151 | 0.31323 | 1.0000 |
| O | O41 | 1.0 | 0.50258 | 0.65076 | 0.35417 | 1.0000 |
| O | O42 | 1.0 | 0.32917 | 0.96582 | 0.30816 | 1.0000 |
| O | O43 | 1.0 | 0.14665 | 0.02823 | 0.34866 | 1.0000 |
| O | O44 | 1.0 | 0.50879 | 0.03452 | 0.34841 | 1.0000 |
| O | O45 | 1.0 | 0.67336 | 0.62905 | 0.81105 | 1.0000 |
| O | O46 | 1.0 | 0.82983 | 0.65813 | 0.74150 | 1.0000 |
| O | O47 | 1.0 | 0.83383 | 0.76405 | 0.82847 | 1.0000 |
| O | O48 | 1.0 | 0.86422 | 0.55226 | 0.82355 | 1.0000 |
| O | O49 | 1.0 | 0.50881 | 0.64840 | 0.74863 | 1.0000 |
| O | O50 | 1.0 | 0.53051 | 0.77723 | 0.82823 | 1.0000 |
| O | O51 | 1.0 | 0.47903 | 0.57410 | 0.84131 | 1.0000 |
| O | O52 | 1.0 | 0.65469 | 0.28842 | 0.80857 | 1.0000 |
| O | O53 | 1.0 | 0.82057 | 0.16114 | 0.82601 | 1.0000 |
| O | O54 | 1.0 | 0.82254 | 0.35720 | 0.85828 | 1.0000 |
| O | O55 | 1.0 | 0.48457 | 0.16410 | 0.81644 | 1.0000 |
| O | O56 | 1.0 | 0.47149 | 0.36194 | 0.84295 | 1.0000 |
| O | O57 | 1.0 | 0.65329 | 0.03415 | 0.81087 | 1.0000 |
| O | O58 | 1.0 | 0.82695 | 0.96419 | 0.85689 | 1.0000 |
| O | O59 | 1.0 | 0.47068 | 0.97231 | 0.84995 | 1.0000 |
| O | O60 | 1.0 | 0.62943 | 0.66001 | 0.94322 | 1.0000 |
| O | O61 | 1.0 | 0.65792 | 0.82185 | 0.00781 | 1.0000 |
| O | O62 | 1.0 | 0.77210 | 0.81160 | 0.92270 | 1.0000 |
| O | O63 | 1.0 | 0.56213 | 0.85332 | 0.92129 | 1.0000 |
| O | O64 | 1.0 | 0.67473 | 0.49383 | 0.00221 | 1.0000 |
| O | O65 | 1.0 | 0.78192 | 0.52637 | 0.91619 | 1.0000 |
| O | O66 | 1.0 | 0.57723 | 0.46538 | 0.91458 | 1.0000 |
| O | O67 | 1.0 | 0.29186 | 0.65199 | 0.93883 | 1.0000 |
| O | O68 | 1.0 | 0.16964 | 0.82187 | 0.92569 | 1.0000 |
| O | O69 | 1.0 | 0.36407 | 0.81651 | 0.88899 | 1.0000 |
| O | O70 | 1.0 | 0.16640 | 0.48330 | 0.93816 | 1.0000 |
| O | O71 | 1.0 | 0.36393 | 0.46598 | 0.90763 | 1.0000 |
| O | O72 | 1.0 | 0.03926 | 0.65439 | 0.93231 | 1.0000 |
| O | O73 | 1.0 | 0.97217 | 0.83931 | 0.89653 | 1.0000 |

|   |      |     |         |         |         |        |
|---|------|-----|---------|---------|---------|--------|
| O | O74  | 1.0 | 0.98090 | 0.46761 | 0.89502 | 1.0000 |
| O | O75  | 1.0 | 0.31759 | 0.32603 | 0.43514 | 1.0000 |
| O | O76  | 1.0 | 0.34547 | 0.17954 | 0.50870 | 1.0000 |
| O | O77  | 1.0 | 0.23436 | 0.13353 | 0.42587 | 1.0000 |
| O | O78  | 1.0 | 0.44745 | 0.16086 | 0.42367 | 1.0000 |
| O | O79  | 1.0 | 0.35400 | 0.47536 | 0.50395 | 1.0000 |
| O | O80  | 1.0 | 0.23902 | 0.51760 | 0.42150 | 1.0000 |
| O | O81  | 1.0 | 0.44807 | 0.49045 | 0.41642 | 1.0000 |
| O | O82  | 1.0 | 0.67970 | 0.34730 | 0.43449 | 1.0000 |
| O | O83  | 1.0 | 0.83814 | 0.20673 | 0.42286 | 1.0000 |
| O | O84  | 1.0 | 0.64548 | 0.16260 | 0.39098 | 1.0000 |
| O | O85  | 1.0 | 0.83681 | 0.49044 | 0.43240 | 1.0000 |
| O | O86  | 1.0 | 0.64849 | 0.54405 | 0.40200 | 1.0000 |
| O | O87  | 1.0 | 0.99375 | 0.34845 | 0.44090 | 1.0000 |
| O | O88  | 1.0 | 0.03402 | 0.16672 | 0.39686 | 1.0000 |
| O | O89  | 1.0 | 0.03094 | 0.54165 | 0.40863 | 1.0000 |
| O | O90  | 1.0 | 0.67079 | 0.36327 | 0.69691 | 1.0000 |
| O | O91  | 1.0 | 0.83420 | 0.31866 | 0.75884 | 1.0000 |
| O | O92  | 1.0 | 0.84336 | 0.26111 | 0.66153 | 1.0000 |
| O | O93  | 1.0 | 0.49176 | 0.31689 | 0.74629 | 1.0000 |
| O | O94  | 1.0 | 0.52858 | 0.23414 | 0.65528 | 1.0000 |
| O | O95  | 1.0 | 0.48603 | 0.44155 | 0.66796 | 1.0000 |
| O | O96  | 1.0 | 0.66457 | 0.71822 | 0.68798 | 1.0000 |
| O | O97  | 1.0 | 0.83594 | 0.84744 | 0.69292 | 1.0000 |
| O | O98  | 1.0 | 0.84527 | 0.66534 | 0.64243 | 1.0000 |
| O | O99  | 1.0 | 0.49035 | 0.83016 | 0.69924 | 1.0000 |
| O | O100 | 1.0 | 0.48024 | 0.64833 | 0.64945 | 1.0000 |
| O | O101 | 1.0 | 0.66152 | 0.96121 | 0.70076 | 1.0000 |
| O | O102 | 1.0 | 0.83597 | 0.04809 | 0.65928 | 1.0000 |
| O | O103 | 1.0 | 0.49010 | 0.00876 | 0.64782 | 1.0000 |
| O | O104 | 1.0 | 0.32926 | 0.62475 | 0.19437 | 1.0000 |
| O | O105 | 1.0 | 0.16042 | 0.67148 | 0.25175 | 1.0000 |
| O | O106 | 1.0 | 0.18861 | 0.77237 | 0.16461 | 1.0000 |
| O | O107 | 1.0 | 0.13121 | 0.56932 | 0.16726 | 1.0000 |

|    |      |     |         |         |         |        |
|----|------|-----|---------|---------|---------|--------|
| O  | O108 | 1.0 | 0.49911 | 0.66941 | 0.25384 | 1.0000 |
| O  | O109 | 1.0 | 0.47494 | 0.76233 | 0.16322 | 1.0000 |
| O  | O110 | 1.0 | 0.52545 | 0.55731 | 0.17348 | 1.0000 |
| O  | O111 | 1.0 | 0.32725 | 0.29568 | 0.18983 | 1.0000 |
| O  | O112 | 1.0 | 0.15824 | 0.16604 | 0.19130 | 1.0000 |
| O  | O113 | 1.0 | 0.13987 | 0.35802 | 0.15574 | 1.0000 |
| O  | O114 | 1.0 | 0.49806 | 0.17193 | 0.18912 | 1.0000 |
| O  | O115 | 1.0 | 0.50366 | 0.35789 | 0.14387 | 1.0000 |
| O  | O116 | 1.0 | 0.32953 | 0.04138 | 0.19120 | 1.0000 |
| O  | O117 | 1.0 | 0.14827 | 0.97683 | 0.14923 | 1.0000 |
| O  | O118 | 1.0 | 0.51204 | 0.98383 | 0.14792 | 1.0000 |
| O  | O119 | 1.0 | 0.01776 | 0.81818 | 0.99511 | 1.0000 |
| O  | O120 | 1.0 | 0.99120 | 0.49336 | 0.99353 | 1.0000 |
| O  | O121 | 1.0 | 0.98108 | 0.17249 | 0.49550 | 1.0000 |
| O  | O122 | 1.0 | 0.97932 | 0.50866 | 0.50575 | 1.0000 |
| O  | O123 | 1.0 | 0.16062 | 0.99571 | 0.24907 | 1.0000 |
| O  | O124 | 1.0 | 0.49756 | 0.00298 | 0.24870 | 1.0000 |
| O  | O125 | 1.0 | 0.83058 | 0.00768 | 0.75747 | 1.0000 |
| O  | O126 | 1.0 | 0.48574 | 0.00912 | 0.74961 | 1.0000 |
| O  | O127 | 1.0 | 0.85671 | 0.46383 | 0.68856 | 1.0000 |
| O  | O128 | 1.0 | 0.46522 | 0.83919 | 0.06435 | 1.0000 |
| Al | Al1  | 1.0 | 0.46576 | 0.13173 | 0.62381 | 1.0000 |
| Al | Al2  | 1.0 | 0.86583 | 0.53571 | 0.62509 | 1.0000 |
| Al | Al3  | 1.0 | 0.53748 | 0.85814 | 0.12766 | 1.0000 |
| Si | Si1  | 1.0 | 0.34060 | 0.54427 | 0.06055 | 1.0000 |
| Si | Si2  | 1.0 | 0.72568 | 0.78627 | 0.05986 | 1.0000 |
| Si | Si3  | 1.0 | 0.72211 | 0.52922 | 0.05747 | 1.0000 |
| Si | Si4  | 1.0 | 0.97219 | 0.78384 | 0.05061 | 1.0000 |
| Si | Si5  | 1.0 | 0.96345 | 0.52820 | 0.05094 | 1.0000 |
| Si | Si6  | 1.0 | 0.65485 | 0.20582 | 0.54777 | 1.0000 |
| Si | Si7  | 1.0 | 0.66244 | 0.45848 | 0.55715 | 1.0000 |
| Si | Si8  | 1.0 | 0.27520 | 0.20436 | 0.56127 | 1.0000 |
| Si | Si9  | 1.0 | 0.28767 | 0.45729 | 0.55644 | 1.0000 |
| Si | Si10 | 1.0 | 0.03045 | 0.20784 | 0.55028 | 1.0000 |

|    |      |     |         |         |         |        |
|----|------|-----|---------|---------|---------|--------|
| Si | Si11 | 1.0 | 0.04340 | 0.46486 | 0.55557 | 1.0000 |
| Si | Si12 | 1.0 | 0.21338 | 0.34509 | 0.31115 | 1.0000 |
| Si | Si13 | 1.0 | 0.46546 | 0.35370 | 0.30425 | 1.0000 |
| Si | Si14 | 1.0 | 0.20169 | 0.71765 | 0.30585 | 1.0000 |
| Si | Si15 | 1.0 | 0.45917 | 0.72000 | 0.30687 | 1.0000 |
| Si | Si16 | 1.0 | 0.20003 | 0.95710 | 0.30469 | 1.0000 |
| Si | Si17 | 1.0 | 0.45851 | 0.96129 | 0.30383 | 1.0000 |
| Si | Si18 | 1.0 | 0.14435 | 0.53280 | 0.38003 | 1.0000 |
| Si | Si19 | 1.0 | 0.79948 | 0.65348 | 0.80158 | 1.0000 |
| Si | Si20 | 1.0 | 0.54687 | 0.65721 | 0.80701 | 1.0000 |
| Si | Si21 | 1.0 | 0.78260 | 0.28067 | 0.81302 | 1.0000 |
| Si | Si22 | 1.0 | 0.52582 | 0.28300 | 0.80304 | 1.0000 |
| Si | Si23 | 1.0 | 0.78236 | 0.04075 | 0.81229 | 1.0000 |
| Si | Si24 | 1.0 | 0.52438 | 0.04441 | 0.80563 | 1.0000 |
| Si | Si25 | 1.0 | 0.86042 | 0.47575 | 0.87353 | 1.0000 |
| Si | Si26 | 1.0 | 0.65686 | 0.78633 | 0.94808 | 1.0000 |
| Si | Si27 | 1.0 | 0.66634 | 0.53579 | 0.94421 | 1.0000 |
| Si | Si28 | 1.0 | 0.28942 | 0.77951 | 0.93541 | 1.0000 |
| Si | Si29 | 1.0 | 0.28743 | 0.52492 | 0.94710 | 1.0000 |
| Si | Si30 | 1.0 | 0.04831 | 0.78258 | 0.93791 | 1.0000 |
| Si | Si31 | 1.0 | 0.04528 | 0.52642 | 0.94021 | 1.0000 |
| Si | Si32 | 1.0 | 0.48269 | 0.85376 | 0.87207 | 1.0000 |
| Si | Si33 | 1.0 | 0.33558 | 0.20092 | 0.44761 | 1.0000 |
| Si | Si34 | 1.0 | 0.33945 | 0.45287 | 0.44403 | 1.0000 |
| Si | Si35 | 1.0 | 0.71291 | 0.22314 | 0.43463 | 1.0000 |
| Si | Si36 | 1.0 | 0.71130 | 0.47211 | 0.44304 | 1.0000 |
| Si | Si37 | 1.0 | 0.96178 | 0.22335 | 0.43947 | 1.0000 |
| Si | Si38 | 1.0 | 0.95983 | 0.47220 | 0.44769 | 1.0000 |
| Si | Si39 | 1.0 | 0.52185 | 0.15086 | 0.37302 | 1.0000 |
| Si | Si40 | 1.0 | 0.54255 | 0.33629 | 0.69024 | 1.0000 |
| Si | Si41 | 1.0 | 0.79402 | 0.72476 | 0.68939 | 1.0000 |
| Si | Si42 | 1.0 | 0.53632 | 0.71130 | 0.69573 | 1.0000 |
| Si | Si43 | 1.0 | 0.79001 | 0.96623 | 0.70202 | 1.0000 |
| Si | Si44 | 1.0 | 0.53144 | 0.95317 | 0.69812 | 1.0000 |

|    |      |     |         |         |         |        |
|----|------|-----|---------|---------|---------|--------|
| Si | Si45 | 1.0 | 0.20439 | 0.66014 | 0.19431 | 1.0000 |
| Si | Si46 | 1.0 | 0.45725 | 0.65638 | 0.19569 | 1.0000 |
| Si | Si47 | 1.0 | 0.19953 | 0.28757 | 0.19812 | 1.0000 |
| Si | Si48 | 1.0 | 0.45644 | 0.29244 | 0.19208 | 1.0000 |
| Si | Si49 | 1.0 | 0.20097 | 0.04507 | 0.19541 | 1.0000 |
| Si | Si50 | 1.0 | 0.45982 | 0.04824 | 0.19342 | 1.0000 |
| Si | Si51 | 1.0 | 0.14279 | 0.47172 | 0.12764 | 1.0000 |
| Si | Si52 | 1.0 | 0.15922 | 0.86180 | 0.12280 | 1.0000 |
| Si | Si53 | 1.0 | 0.53504 | 0.47727 | 0.12595 | 1.0000 |
| Si | Si54 | 1.0 | 0.84365 | 0.15533 | 0.62552 | 1.0000 |
| Si | Si55 | 1.0 | 0.46995 | 0.53107 | 0.62440 | 1.0000 |
| Si | Si56 | 1.0 | 0.15337 | 0.14091 | 0.37739 | 1.0000 |
| Si | Si57 | 1.0 | 0.53294 | 0.53382 | 0.37468 | 1.0000 |
| Si | Si58 | 1.0 | 0.85057 | 0.84467 | 0.87591 | 1.0000 |
| Si | Si59 | 1.0 | 0.47467 | 0.46796 | 0.87652 | 1.0000 |
| Si | Si60 | 1.0 | 0.79702 | 0.34521 | 0.70144 | 1.0000 |
| Si | Si61 | 1.0 | 0.33997 | 0.79874 | 0.04869 | 1.0000 |

T7T7T9:

data\_image0

\_chemical\_formula\_structural H3O128Al3Si61  
\_chemical\_formula\_sum "H3 O128 Al3 Si61"  
\_cell\_length\_a 12.5638  
\_cell\_length\_b 12.5205  
\_cell\_length\_c 26.4643  
\_cell\_angle\_alpha 90.2054  
\_cell\_angle\_beta 90.3564  
\_cell\_angle\_gamma 90.4529

\_space\_group\_name\_H-M\_alt "P 1"  
\_space\_group\_IT\_number 1

loop\_

\_space\_group\_symop\_operation\_xyz  
'x, y, z'

loop\_

\_atom\_site\_type\_symbol  
\_atom\_site\_label  
\_atom\_site\_symmetry\_multiplicity  
\_atom\_site\_fract\_x  
\_atom\_site\_fract\_y  
\_atom\_site\_fract\_z  
\_atom\_site\_occupancy  
H H1 1.0 0.47953 0.14820 0.53451 1.0000  
H H2 1.0 0.85558 0.51496 0.71751 1.0000  
H H3 1.0 0.06963 0.97258 0.35894 1.0000  
O O1 1.0 0.32203 0.65740 0.06727 1.0000  
O O2 1.0 0.34625 0.81307 0.99938 1.0000  
O O3 1.0 0.22436 0.84188 0.07909 1.0000  
O O4 1.0 0.43426 0.83364 0.08850 1.0000  
O O5 1.0 0.34456 0.51386 0.99279 1.0000

|   |     |     |         |         |         |        |
|---|-----|-----|---------|---------|---------|--------|
| O | O6  | 1.0 | 0.23146 | 0.46542 | 0.07289 | 1.0000 |
| O | O7  | 1.0 | 0.44298 | 0.48609 | 0.07900 | 1.0000 |
| O | O8  | 1.0 | 0.69878 | 0.67247 | 0.06421 | 1.0000 |
| O | O9  | 1.0 | 0.83204 | 0.83716 | 0.05916 | 1.0000 |
| O | O10 | 1.0 | 0.64232 | 0.86423 | 0.09638 | 1.0000 |
| O | O11 | 1.0 | 0.83342 | 0.50738 | 0.06407 | 1.0000 |
| O | O12 | 1.0 | 0.64605 | 0.48899 | 0.10510 | 1.0000 |
| O | O13 | 1.0 | 0.96734 | 0.67166 | 0.05761 | 1.0000 |
| O | O14 | 1.0 | 0.01935 | 0.85376 | 0.10125 | 1.0000 |
| O | O15 | 1.0 | 0.02793 | 0.48840 | 0.09788 | 1.0000 |
| O | O16 | 1.0 | 0.63711 | 0.32807 | 0.55372 | 1.0000 |
| O | O17 | 1.0 | 0.67959 | 0.16601 | 0.49070 | 1.0000 |
| O | O18 | 1.0 | 0.74084 | 0.15454 | 0.58735 | 1.0000 |
| O | O19 | 1.0 | 0.53568 | 0.14327 | 0.56144 | 1.0000 |
| O | O20 | 1.0 | 0.68127 | 0.50346 | 0.50194 | 1.0000 |
| O | O21 | 1.0 | 0.76821 | 0.47156 | 0.59308 | 1.0000 |
| O | O22 | 1.0 | 0.56028 | 0.51469 | 0.58183 | 1.0000 |
| O | O23 | 1.0 | 0.28074 | 0.33271 | 0.56776 | 1.0000 |
| O | O24 | 1.0 | 0.15423 | 0.16059 | 0.55565 | 1.0000 |
| O | O25 | 1.0 | 0.33517 | 0.14891 | 0.60848 | 1.0000 |
| O | O26 | 1.0 | 0.16900 | 0.50533 | 0.55083 | 1.0000 |
| O | O27 | 1.0 | 0.35262 | 0.51984 | 0.60091 | 1.0000 |
| O | O28 | 1.0 | 0.03779 | 0.33409 | 0.55323 | 1.0000 |
| O | O29 | 1.0 | 0.95598 | 0.15718 | 0.59309 | 1.0000 |
| O | O30 | 1.0 | 0.99453 | 0.50821 | 0.60523 | 1.0000 |
| O | O31 | 1.0 | 0.34089 | 0.37864 | 0.31083 | 1.0000 |
| O | O32 | 1.0 | 0.17826 | 0.34597 | 0.24767 | 1.0000 |
| O | O33 | 1.0 | 0.20331 | 0.21668 | 0.32619 | 1.0000 |
| O | O34 | 1.0 | 0.14445 | 0.42029 | 0.33952 | 1.0000 |
| O | O35 | 1.0 | 0.49766 | 0.33649 | 0.24593 | 1.0000 |
| O | O36 | 1.0 | 0.48658 | 0.23194 | 0.33224 | 1.0000 |
| O | O37 | 1.0 | 0.53993 | 0.44006 | 0.32944 | 1.0000 |
| O | O38 | 1.0 | 0.33084 | 0.70932 | 0.31002 | 1.0000 |
| O | O39 | 1.0 | 0.15498 | 0.82099 | 0.30395 | 1.0000 |

|   |     |     |         |         |         |        |
|---|-----|-----|---------|---------|---------|--------|
| O | O40 | 1.0 | 0.15106 | 0.63301 | 0.34647 | 1.0000 |
| O | O41 | 1.0 | 0.49750 | 0.83630 | 0.31567 | 1.0000 |
| O | O42 | 1.0 | 0.50474 | 0.64335 | 0.35504 | 1.0000 |
| O | O43 | 1.0 | 0.32332 | 0.95798 | 0.31015 | 1.0000 |
| O | O44 | 1.0 | 0.49758 | 0.02835 | 0.35555 | 1.0000 |
| O | O45 | 1.0 | 0.67331 | 0.68584 | 0.81579 | 1.0000 |
| O | O46 | 1.0 | 0.82174 | 0.65525 | 0.74294 | 1.0000 |
| O | O47 | 1.0 | 0.86824 | 0.76043 | 0.82794 | 1.0000 |
| O | O48 | 1.0 | 0.83396 | 0.54881 | 0.82601 | 1.0000 |
| O | O49 | 1.0 | 0.52266 | 0.64699 | 0.74753 | 1.0000 |
| O | O50 | 1.0 | 0.47872 | 0.75892 | 0.83126 | 1.0000 |
| O | O51 | 1.0 | 0.51173 | 0.55131 | 0.83437 | 1.0000 |
| O | O52 | 1.0 | 0.66127 | 0.32197 | 0.81481 | 1.0000 |
| O | O53 | 1.0 | 0.79764 | 0.15953 | 0.82695 | 1.0000 |
| O | O54 | 1.0 | 0.84877 | 0.35156 | 0.85798 | 1.0000 |
| O | O55 | 1.0 | 0.52102 | 0.16244 | 0.81725 | 1.0000 |
| O | O56 | 1.0 | 0.46553 | 0.34850 | 0.84834 | 1.0000 |
| O | O57 | 1.0 | 0.65750 | 0.00128 | 0.80946 | 1.0000 |
| O | O58 | 1.0 | 0.84175 | 0.96453 | 0.85308 | 1.0000 |
| O | O59 | 1.0 | 0.46375 | 0.96961 | 0.84125 | 1.0000 |
| O | O60 | 1.0 | 0.63133 | 0.66053 | 0.93722 | 1.0000 |
| O | O61 | 1.0 | 0.66235 | 0.82758 | 0.99819 | 1.0000 |
| O | O62 | 1.0 | 0.77910 | 0.80748 | 0.91606 | 1.0000 |
| O | O63 | 1.0 | 0.57275 | 0.85545 | 0.90939 | 1.0000 |
| O | O64 | 1.0 | 0.66171 | 0.50511 | 0.00507 | 1.0000 |
| O | O65 | 1.0 | 0.76519 | 0.50200 | 0.91857 | 1.0000 |
| O | O66 | 1.0 | 0.55475 | 0.46459 | 0.92250 | 1.0000 |
| O | O67 | 1.0 | 0.28479 | 0.66891 | 0.93107 | 1.0000 |
| O | O68 | 1.0 | 0.17121 | 0.84389 | 0.94352 | 1.0000 |
| O | O69 | 1.0 | 0.36063 | 0.85368 | 0.90220 | 1.0000 |
| O | O70 | 1.0 | 0.16286 | 0.49749 | 0.93930 | 1.0000 |
| O | O71 | 1.0 | 0.35074 | 0.48698 | 0.89422 | 1.0000 |
| O | O72 | 1.0 | 0.04306 | 0.67241 | 0.94504 | 1.0000 |
| O | O73 | 1.0 | 0.98261 | 0.85183 | 0.90086 | 1.0000 |



|   |      |     |         |         |         |        |
|---|------|-----|---------|---------|---------|--------|
| O | O74  | 1.0 | 0.97150 | 0.49817 | 0.89887 | 1.0000 |
| O | O75  | 1.0 | 0.31112 | 0.32270 | 0.43828 | 1.0000 |
| O | O76  | 1.0 | 0.34753 | 0.17488 | 0.51052 | 1.0000 |
| O | O77  | 1.0 | 0.24939 | 0.12282 | 0.42342 | 1.0000 |
| O | O78  | 1.0 | 0.45728 | 0.17108 | 0.42841 | 1.0000 |
| O | O79  | 1.0 | 0.35158 | 0.48068 | 0.50313 | 1.0000 |
| O | O80  | 1.0 | 0.23973 | 0.51588 | 0.41859 | 1.0000 |
| O | O81  | 1.0 | 0.44674 | 0.48172 | 0.41608 | 1.0000 |
| O | O82  | 1.0 | 0.68419 | 0.34252 | 0.43619 | 1.0000 |
| O | O83  | 1.0 | 0.83592 | 0.19408 | 0.42540 | 1.0000 |
| O | O84  | 1.0 | 0.64657 | 0.15803 | 0.39023 | 1.0000 |
| O | O85  | 1.0 | 0.83660 | 0.49182 | 0.43354 | 1.0000 |
| O | O86  | 1.0 | 0.64717 | 0.53841 | 0.40404 | 1.0000 |
| O | O87  | 1.0 | 0.98672 | 0.34172 | 0.44054 | 1.0000 |
| O | O88  | 1.0 | 0.02913 | 0.15644 | 0.39644 | 1.0000 |
| O | O89  | 1.0 | 0.03048 | 0.53220 | 0.40640 | 1.0000 |
| O | O90  | 1.0 | 0.67237 | 0.36357 | 0.69762 | 1.0000 |
| O | O91  | 1.0 | 0.83443 | 0.31082 | 0.75877 | 1.0000 |
| O | O92  | 1.0 | 0.84223 | 0.25851 | 0.66111 | 1.0000 |
| O | O93  | 1.0 | 0.49857 | 0.32007 | 0.74992 | 1.0000 |
| O | O94  | 1.0 | 0.52988 | 0.22955 | 0.65956 | 1.0000 |
| O | O95  | 1.0 | 0.48565 | 0.43874 | 0.66897 | 1.0000 |
| O | O96  | 1.0 | 0.66824 | 0.71864 | 0.68215 | 1.0000 |
| O | O97  | 1.0 | 0.83930 | 0.84597 | 0.69566 | 1.0000 |
| O | O98  | 1.0 | 0.85461 | 0.66304 | 0.64515 | 1.0000 |
| O | O99  | 1.0 | 0.49755 | 0.83124 | 0.70095 | 1.0000 |
| O | O100 | 1.0 | 0.48054 | 0.64757 | 0.65013 | 1.0000 |
| O | O101 | 1.0 | 0.66671 | 0.96405 | 0.69547 | 1.0000 |
| O | O102 | 1.0 | 0.84449 | 0.04348 | 0.65653 | 1.0000 |
| O | O103 | 1.0 | 0.49065 | 0.00354 | 0.64401 | 1.0000 |
| O | O104 | 1.0 | 0.34314 | 0.69050 | 0.18811 | 1.0000 |
| O | O105 | 1.0 | 0.17698 | 0.64692 | 0.24739 | 1.0000 |
| O | O106 | 1.0 | 0.15552 | 0.77267 | 0.16835 | 1.0000 |
| O | O107 | 1.0 | 0.18362 | 0.56232 | 0.15776 | 1.0000 |

|    |      |     |         |         |         |        |
|----|------|-----|---------|---------|---------|--------|
| O  | O108 | 1.0 | 0.50031 | 0.66410 | 0.25518 | 1.0000 |
| O  | O109 | 1.0 | 0.53891 | 0.75700 | 0.16769 | 1.0000 |
| O  | O110 | 1.0 | 0.49735 | 0.54904 | 0.17185 | 1.0000 |
| O  | O111 | 1.0 | 0.33417 | 0.29744 | 0.18398 | 1.0000 |
| O  | O112 | 1.0 | 0.16738 | 0.16819 | 0.19106 | 1.0000 |
| O  | O113 | 1.0 | 0.14525 | 0.35488 | 0.14873 | 1.0000 |
| O  | O114 | 1.0 | 0.49799 | 0.16230 | 0.18898 | 1.0000 |
| O  | O115 | 1.0 | 0.52118 | 0.34788 | 0.14623 | 1.0000 |
| O  | O116 | 1.0 | 0.33132 | 0.03052 | 0.19298 | 1.0000 |
| O  | O117 | 1.0 | 0.15121 | 0.98016 | 0.14754 | 1.0000 |
| O  | O118 | 1.0 | 0.51642 | 0.96658 | 0.15699 | 1.0000 |
| O  | O119 | 1.0 | 0.00080 | 0.84294 | 0.00091 | 1.0000 |
| O  | O120 | 1.0 | 0.99329 | 0.50150 | 0.99882 | 1.0000 |
| O  | O121 | 1.0 | 0.98454 | 0.16634 | 0.49543 | 1.0000 |
| O  | O122 | 1.0 | 0.98409 | 0.50825 | 0.50416 | 1.0000 |
| O  | O123 | 1.0 | 0.15939 | 0.99566 | 0.24753 | 1.0000 |
| O  | O124 | 1.0 | 0.49423 | 0.00398 | 0.25528 | 1.0000 |
| O  | O125 | 1.0 | 0.83228 | 0.01669 | 0.75469 | 1.0000 |
| O  | O126 | 1.0 | 0.49443 | 0.02016 | 0.74454 | 1.0000 |
| O  | O127 | 1.0 | 0.85911 | 0.46082 | 0.69004 | 1.0000 |
| O  | O128 | 1.0 | 0.13587 | 0.00509 | 0.34728 | 1.0000 |
| Al | Al1  | 1.0 | 0.46641 | 0.13121 | 0.62483 | 1.0000 |
| Al | Al2  | 1.0 | 0.86938 | 0.53241 | 0.62663 | 1.0000 |
| Al | Al3  | 1.0 | 0.15713 | 0.14143 | 0.37597 | 1.0000 |
| Si | Si1  | 1.0 | 0.33216 | 0.78597 | 0.05874 | 1.0000 |
| Si | Si2  | 1.0 | 0.33543 | 0.53111 | 0.05323 | 1.0000 |
| Si | Si3  | 1.0 | 0.70893 | 0.79984 | 0.05403 | 1.0000 |
| Si | Si4  | 1.0 | 0.71040 | 0.54396 | 0.05916 | 1.0000 |
| Si | Si5  | 1.0 | 0.95462 | 0.80039 | 0.05437 | 1.0000 |
| Si | Si6  | 1.0 | 0.95572 | 0.54269 | 0.05426 | 1.0000 |
| Si | Si7  | 1.0 | 0.53212 | 0.85479 | 0.12745 | 1.0000 |
| Si | Si8  | 1.0 | 0.65445 | 0.20173 | 0.54815 | 1.0000 |
| Si | Si9  | 1.0 | 0.66424 | 0.45644 | 0.55875 | 1.0000 |
| Si | Si10 | 1.0 | 0.27637 | 0.20370 | 0.56199 | 1.0000 |

|    |      |     |         |         |         |        |
|----|------|-----|---------|---------|---------|--------|
| Si | Si11 | 1.0 | 0.28823 | 0.45930 | 0.55592 | 1.0000 |
| Si | Si12 | 1.0 | 0.03353 | 0.20559 | 0.54951 | 1.0000 |
| Si | Si13 | 1.0 | 0.04598 | 0.46416 | 0.55454 | 1.0000 |
| Si | Si14 | 1.0 | 0.21638 | 0.33756 | 0.30681 | 1.0000 |
| Si | Si15 | 1.0 | 0.46571 | 0.34621 | 0.30504 | 1.0000 |
| Si | Si16 | 1.0 | 0.20407 | 0.70020 | 0.30196 | 1.0000 |
| Si | Si17 | 1.0 | 0.45938 | 0.71265 | 0.30875 | 1.0000 |
| Si | Si18 | 1.0 | 0.45387 | 0.95693 | 0.30896 | 1.0000 |
| Si | Si19 | 1.0 | 0.14284 | 0.52220 | 0.37777 | 1.0000 |
| Si | Si20 | 1.0 | 0.79810 | 0.66362 | 0.80351 | 1.0000 |
| Si | Si21 | 1.0 | 0.54610 | 0.66131 | 0.80732 | 1.0000 |
| Si | Si22 | 1.0 | 0.78482 | 0.28492 | 0.81457 | 1.0000 |
| Si | Si23 | 1.0 | 0.53645 | 0.28803 | 0.80642 | 1.0000 |
| Si | Si24 | 1.0 | 0.78241 | 0.03547 | 0.81054 | 1.0000 |
| Si | Si25 | 1.0 | 0.53420 | 0.03866 | 0.80219 | 1.0000 |
| Si | Si26 | 1.0 | 0.85375 | 0.47564 | 0.87602 | 1.0000 |
| Si | Si27 | 1.0 | 0.66145 | 0.78756 | 0.93970 | 1.0000 |
| Si | Si28 | 1.0 | 0.65372 | 0.53343 | 0.94545 | 1.0000 |
| Si | Si29 | 1.0 | 0.29029 | 0.79493 | 0.94434 | 1.0000 |
| Si | Si30 | 1.0 | 0.28503 | 0.54126 | 0.93964 | 1.0000 |
| Si | Si31 | 1.0 | 0.04919 | 0.80190 | 0.94755 | 1.0000 |
| Si | Si32 | 1.0 | 0.04278 | 0.54297 | 0.94559 | 1.0000 |
| Si | Si33 | 1.0 | 0.47062 | 0.85781 | 0.87107 | 1.0000 |
| Si | Si34 | 1.0 | 0.33824 | 0.19709 | 0.44938 | 1.0000 |
| Si | Si35 | 1.0 | 0.33710 | 0.45012 | 0.44396 | 1.0000 |
| Si | Si36 | 1.0 | 0.71234 | 0.21630 | 0.43579 | 1.0000 |
| Si | Si37 | 1.0 | 0.71275 | 0.46857 | 0.44499 | 1.0000 |
| Si | Si38 | 1.0 | 0.96062 | 0.21410 | 0.43915 | 1.0000 |
| Si | Si39 | 1.0 | 0.95944 | 0.46744 | 0.44707 | 1.0000 |
| Si | Si40 | 1.0 | 0.52094 | 0.14866 | 0.37617 | 1.0000 |
| Si | Si41 | 1.0 | 0.54435 | 0.33538 | 0.69276 | 1.0000 |
| Si | Si42 | 1.0 | 0.79635 | 0.72340 | 0.68993 | 1.0000 |
| Si | Si43 | 1.0 | 0.54235 | 0.71142 | 0.69481 | 1.0000 |
| Si | Si44 | 1.0 | 0.79457 | 0.96719 | 0.70014 | 1.0000 |

|    |      |     |         |         |         |        |
|----|------|-----|---------|---------|---------|--------|
| Si | Si45 | 1.0 | 0.53698 | 0.95478 | 0.69491 | 1.0000 |
| Si | Si46 | 1.0 | 0.21529 | 0.66735 | 0.18962 | 1.0000 |
| Si | Si47 | 1.0 | 0.46952 | 0.66465 | 0.19547 | 1.0000 |
| Si | Si48 | 1.0 | 0.20660 | 0.29209 | 0.19359 | 1.0000 |
| Si | Si49 | 1.0 | 0.46184 | 0.28606 | 0.19184 | 1.0000 |
| Si | Si50 | 1.0 | 0.20346 | 0.04519 | 0.19438 | 1.0000 |
| Si | Si51 | 1.0 | 0.45974 | 0.04077 | 0.19863 | 1.0000 |
| Si | Si52 | 1.0 | 0.14681 | 0.46794 | 0.11926 | 1.0000 |
| Si | Si53 | 1.0 | 0.13887 | 0.86100 | 0.12402 | 1.0000 |
| Si | Si54 | 1.0 | 0.52630 | 0.46923 | 0.12536 | 1.0000 |
| Si | Si55 | 1.0 | 0.84600 | 0.15314 | 0.62431 | 1.0000 |
| Si | Si56 | 1.0 | 0.47101 | 0.52887 | 0.62545 | 1.0000 |
| Si | Si57 | 1.0 | 0.53331 | 0.52543 | 0.37599 | 1.0000 |
| Si | Si58 | 1.0 | 0.86611 | 0.84641 | 0.87444 | 1.0000 |
| Si | Si59 | 1.0 | 0.47084 | 0.46442 | 0.87521 | 1.0000 |
| Si | Si60 | 1.0 | 0.79782 | 0.34213 | 0.70197 | 1.0000 |
| Si | Si61 | 1.0 | 0.19855 | 0.94177 | 0.29934 | 1.0000 |

AlSiAl-T7T7T9

data\_image0

\_chemical\_formula\_structural H3O128Al3Si61  
\_chemical\_formula\_sum "H3 O128 Al3 Si61"  
\_cell\_length\_a 12.5629  
\_cell\_length\_b 12.5036  
\_cell\_length\_c 26.4085  
\_cell\_angle\_alpha 90.4209  
\_cell\_angle\_beta 90.376  
\_cell\_angle\_gamma 90.6339

\_space\_group\_name\_H-M\_alt "P 1"  
\_space\_group\_IT\_number 1

loop\_

\_space\_group\_symop\_operation\_xyz  
'x, y, z'

loop\_

\_atom\_site\_type\_symbol  
\_atom\_site\_label  
\_atom\_site\_symmetry\_multiplicity  
\_atom\_site\_fract\_x  
\_atom\_site\_fract\_y  
\_atom\_site\_fract\_z  
\_atom\_site\_occupancy  
H H1 1.0 0.47868 0.14917 0.52961 1.0000  
H H2 1.0 0.85286 0.51118 0.71984 1.0000  
H H3 1.0 0.92659 0.98606 0.64277 1.0000  
O O1 1.0 0.31151 0.65822 0.06552 1.0000  
O O2 1.0 0.34519 0.81586 0.99974 1.0000  
O O3 1.0 0.22449 0.84709 0.07975 1.0000  
O O4 1.0 0.43470 0.82622 0.08890 1.0000  
O O5 1.0 0.34100 0.51092 0.99301 1.0000

|   |     |     |         |         |         |        |
|---|-----|-----|---------|---------|---------|--------|
| O | O6  | 1.0 | 0.23032 | 0.46415 | 0.07532 | 1.0000 |
| O | O7  | 1.0 | 0.44264 | 0.49353 | 0.07801 | 1.0000 |
| O | O8  | 1.0 | 0.70329 | 0.67471 | 0.06452 | 1.0000 |
| O | O9  | 1.0 | 0.83039 | 0.84397 | 0.05764 | 1.0000 |
| O | O10 | 1.0 | 0.64117 | 0.86500 | 0.09693 | 1.0000 |
| O | O11 | 1.0 | 0.83244 | 0.50578 | 0.06266 | 1.0000 |
| O | O12 | 1.0 | 0.64576 | 0.49272 | 0.10630 | 1.0000 |
| O | O13 | 1.0 | 0.96024 | 0.67470 | 0.05669 | 1.0000 |
| O | O14 | 1.0 | 0.01803 | 0.85678 | 0.10042 | 1.0000 |
| O | O15 | 1.0 | 0.02728 | 0.49750 | 0.10065 | 1.0000 |
| O | O16 | 1.0 | 0.63958 | 0.32489 | 0.54965 | 1.0000 |
| O | O17 | 1.0 | 0.68273 | 0.16526 | 0.48618 | 1.0000 |
| O | O18 | 1.0 | 0.73567 | 0.14719 | 0.58480 | 1.0000 |
| O | O19 | 1.0 | 0.53517 | 0.14208 | 0.55631 | 1.0000 |
| O | O20 | 1.0 | 0.68244 | 0.50534 | 0.50230 | 1.0000 |
| O | O21 | 1.0 | 0.76902 | 0.46616 | 0.59343 | 1.0000 |
| O | O22 | 1.0 | 0.56118 | 0.50689 | 0.58263 | 1.0000 |
| O | O23 | 1.0 | 0.28504 | 0.32819 | 0.56574 | 1.0000 |
| O | O24 | 1.0 | 0.16130 | 0.15408 | 0.54876 | 1.0000 |
| O | O25 | 1.0 | 0.33856 | 0.14153 | 0.60386 | 1.0000 |
| O | O26 | 1.0 | 0.17023 | 0.50090 | 0.55439 | 1.0000 |
| O | O27 | 1.0 | 0.35457 | 0.51226 | 0.60363 | 1.0000 |
| O | O28 | 1.0 | 0.04326 | 0.32645 | 0.55222 | 1.0000 |
| O | O29 | 1.0 | 0.96843 | 0.14275 | 0.58967 | 1.0000 |
| O | O30 | 1.0 | 0.99633 | 0.49373 | 0.60970 | 1.0000 |
| O | O31 | 1.0 | 0.34090 | 0.38098 | 0.31300 | 1.0000 |
| O | O32 | 1.0 | 0.17708 | 0.34503 | 0.25050 | 1.0000 |
| O | O33 | 1.0 | 0.20224 | 0.22291 | 0.33114 | 1.0000 |
| O | O34 | 1.0 | 0.14506 | 0.42661 | 0.34212 | 1.0000 |
| O | O35 | 1.0 | 0.49304 | 0.34985 | 0.24400 | 1.0000 |
| O | O36 | 1.0 | 0.48798 | 0.23250 | 0.32593 | 1.0000 |
| O | O37 | 1.0 | 0.54086 | 0.44150 | 0.33069 | 1.0000 |
| O | O38 | 1.0 | 0.33103 | 0.71022 | 0.31369 | 1.0000 |
| O | O39 | 1.0 | 0.15868 | 0.83027 | 0.30847 | 1.0000 |

|   |     |     |         |         |         |        |
|---|-----|-----|---------|---------|---------|--------|
| O | O40 | 1.0 | 0.14724 | 0.63951 | 0.34755 | 1.0000 |
| O | O41 | 1.0 | 0.50063 | 0.83677 | 0.31452 | 1.0000 |
| O | O42 | 1.0 | 0.50721 | 0.64551 | 0.35634 | 1.0000 |
| O | O43 | 1.0 | 0.32856 | 0.96053 | 0.30764 | 1.0000 |
| O | O44 | 1.0 | 0.14680 | 0.02170 | 0.34866 | 1.0000 |
| O | O45 | 1.0 | 0.50640 | 0.03022 | 0.35158 | 1.0000 |
| O | O46 | 1.0 | 0.67032 | 0.68005 | 0.81533 | 1.0000 |
| O | O47 | 1.0 | 0.82150 | 0.64326 | 0.74480 | 1.0000 |
| O | O48 | 1.0 | 0.86454 | 0.75619 | 0.82797 | 1.0000 |
| O | O49 | 1.0 | 0.83081 | 0.54353 | 0.82943 | 1.0000 |
| O | O50 | 1.0 | 0.51702 | 0.64929 | 0.74738 | 1.0000 |
| O | O51 | 1.0 | 0.47389 | 0.74284 | 0.83611 | 1.0000 |
| O | O52 | 1.0 | 0.51345 | 0.53742 | 0.83036 | 1.0000 |
| O | O53 | 1.0 | 0.65602 | 0.31274 | 0.81731 | 1.0000 |
| O | O54 | 1.0 | 0.79823 | 0.15629 | 0.82854 | 1.0000 |
| O | O55 | 1.0 | 0.83953 | 0.34750 | 0.86423 | 1.0000 |
| O | O56 | 1.0 | 0.51547 | 0.15293 | 0.81890 | 1.0000 |
| O | O57 | 1.0 | 0.46035 | 0.33983 | 0.84968 | 1.0000 |
| O | O58 | 1.0 | 0.65848 | 0.99793 | 0.80751 | 1.0000 |
| O | O59 | 1.0 | 0.84071 | 0.96024 | 0.85313 | 1.0000 |
| O | O60 | 1.0 | 0.46308 | 0.95373 | 0.83378 | 1.0000 |
| O | O61 | 1.0 | 0.62520 | 0.66062 | 0.93690 | 1.0000 |
| O | O62 | 1.0 | 0.65845 | 0.82767 | 0.99829 | 1.0000 |
| O | O63 | 1.0 | 0.77800 | 0.80425 | 0.91690 | 1.0000 |
| O | O64 | 1.0 | 0.57388 | 0.85680 | 0.90761 | 1.0000 |
| O | O65 | 1.0 | 0.65422 | 0.50788 | 0.00665 | 1.0000 |
| O | O66 | 1.0 | 0.76508 | 0.50585 | 0.92304 | 1.0000 |
| O | O67 | 1.0 | 0.55514 | 0.46197 | 0.92143 | 1.0000 |
| O | O68 | 1.0 | 0.28684 | 0.66910 | 0.93153 | 1.0000 |
| O | O69 | 1.0 | 0.17088 | 0.84295 | 0.94259 | 1.0000 |
| O | O70 | 1.0 | 0.36119 | 0.85584 | 0.90262 | 1.0000 |
| O | O71 | 1.0 | 0.16315 | 0.49716 | 0.93774 | 1.0000 |
| O | O72 | 1.0 | 0.35192 | 0.48784 | 0.89363 | 1.0000 |
| O | O73 | 1.0 | 0.04273 | 0.67092 | 0.94539 | 1.0000 |

|   |      |     |         |         |         |        |
|---|------|-----|---------|---------|---------|--------|
| O | O74  | 1.0 | 0.98196 | 0.84802 | 0.90003 | 1.0000 |
| O | O75  | 1.0 | 0.96978 | 0.49346 | 0.90142 | 1.0000 |
| O | O76  | 1.0 | 0.31208 | 0.33033 | 0.43737 | 1.0000 |
| O | O77  | 1.0 | 0.35201 | 0.17504 | 0.50563 | 1.0000 |
| O | O78  | 1.0 | 0.23986 | 0.13565 | 0.42119 | 1.0000 |
| O | O79  | 1.0 | 0.45142 | 0.17388 | 0.42107 | 1.0000 |
| O | O80  | 1.0 | 0.35135 | 0.48474 | 0.50455 | 1.0000 |
| O | O81  | 1.0 | 0.25040 | 0.52695 | 0.41727 | 1.0000 |
| O | O82  | 1.0 | 0.45540 | 0.48452 | 0.41945 | 1.0000 |
| O | O83  | 1.0 | 0.70183 | 0.34655 | 0.43555 | 1.0000 |
| O | O84  | 1.0 | 0.84117 | 0.18870 | 0.42027 | 1.0000 |
| O | O85  | 1.0 | 0.64696 | 0.16921 | 0.38653 | 1.0000 |
| O | O86  | 1.0 | 0.84220 | 0.50805 | 0.43596 | 1.0000 |
| O | O87  | 1.0 | 0.65334 | 0.54063 | 0.40349 | 1.0000 |
| O | O88  | 1.0 | 0.97914 | 0.34652 | 0.44091 | 1.0000 |
| O | O89  | 1.0 | 0.03936 | 0.17378 | 0.39220 | 1.0000 |
| O | O90  | 1.0 | 0.04037 | 0.53729 | 0.41302 | 1.0000 |
| O | O91  | 1.0 | 0.67205 | 0.35506 | 0.70179 | 1.0000 |
| O | O92  | 1.0 | 0.83411 | 0.31522 | 0.76436 | 1.0000 |
| O | O93  | 1.0 | 0.84444 | 0.24919 | 0.66820 | 1.0000 |
| O | O94  | 1.0 | 0.49540 | 0.30856 | 0.75045 | 1.0000 |
| O | O95  | 1.0 | 0.52678 | 0.23035 | 0.65686 | 1.0000 |
| O | O96  | 1.0 | 0.49053 | 0.43916 | 0.67274 | 1.0000 |
| O | O97  | 1.0 | 0.67045 | 0.71277 | 0.68397 | 1.0000 |
| O | O98  | 1.0 | 0.84302 | 0.83447 | 0.70092 | 1.0000 |
| O | O99  | 1.0 | 0.85747 | 0.65531 | 0.64661 | 1.0000 |
| O | O100 | 1.0 | 0.50361 | 0.83180 | 0.69815 | 1.0000 |
| O | O101 | 1.0 | 0.48345 | 0.64528 | 0.64909 | 1.0000 |
| O | O102 | 1.0 | 0.67458 | 0.96317 | 0.69089 | 1.0000 |
| O | O103 | 1.0 | 0.49946 | 0.00264 | 0.63942 | 1.0000 |
| O | O104 | 1.0 | 0.34192 | 0.69863 | 0.18859 | 1.0000 |
| O | O105 | 1.0 | 0.17708 | 0.65699 | 0.24931 | 1.0000 |
| O | O106 | 1.0 | 0.15124 | 0.77274 | 0.16727 | 1.0000 |
| O | O107 | 1.0 | 0.18682 | 0.56308 | 0.16107 | 1.0000 |



|    |      |     |         |         |         |        |
|----|------|-----|---------|---------|---------|--------|
| O  | O108 | 1.0 | 0.49645 | 0.66171 | 0.25630 | 1.0000 |
| O  | O109 | 1.0 | 0.53763 | 0.76745 | 0.17169 | 1.0000 |
| O  | O110 | 1.0 | 0.49562 | 0.55734 | 0.17054 | 1.0000 |
| O  | O111 | 1.0 | 0.32950 | 0.29979 | 0.18403 | 1.0000 |
| O  | O112 | 1.0 | 0.16241 | 0.17017 | 0.19215 | 1.0000 |
| O  | O113 | 1.0 | 0.13891 | 0.35838 | 0.15151 | 1.0000 |
| O  | O114 | 1.0 | 0.49670 | 0.16874 | 0.19028 | 1.0000 |
| O  | O115 | 1.0 | 0.51482 | 0.35311 | 0.14476 | 1.0000 |
| O  | O116 | 1.0 | 0.32960 | 0.03804 | 0.19279 | 1.0000 |
| O  | O117 | 1.0 | 0.14881 | 0.98210 | 0.14881 | 1.0000 |
| O  | O118 | 1.0 | 0.51076 | 0.97524 | 0.15220 | 1.0000 |
| O  | O119 | 1.0 | 0.00035 | 0.84425 | 0.00010 | 1.0000 |
| O  | O120 | 1.0 | 0.99909 | 0.50143 | 0.00121 | 1.0000 |
| O  | O121 | 1.0 | 0.99054 | 0.16429 | 0.49067 | 1.0000 |
| O  | O122 | 1.0 | 0.98404 | 0.50535 | 0.50914 | 1.0000 |
| O  | O123 | 1.0 | 0.16008 | 0.99799 | 0.24904 | 1.0000 |
| O  | O124 | 1.0 | 0.49805 | 0.00110 | 0.25153 | 1.0000 |
| O  | O125 | 1.0 | 0.83465 | 0.01527 | 0.75490 | 1.0000 |
| O  | O126 | 1.0 | 0.50269 | 0.02271 | 0.74011 | 1.0000 |
| O  | O127 | 1.0 | 0.85659 | 0.45609 | 0.69253 | 1.0000 |
| O  | O128 | 1.0 | 0.86233 | 0.02063 | 0.65530 | 1.0000 |
| Al | Al1  | 1.0 | 0.47070 | 0.12988 | 0.62024 | 1.0000 |
| Al | Al2  | 1.0 | 0.87045 | 0.52238 | 0.62885 | 1.0000 |
| Al | Al3  | 1.0 | 0.84990 | 0.15387 | 0.62111 | 1.0000 |
| Si | Si1  | 1.0 | 0.32928 | 0.78673 | 0.05898 | 1.0000 |
| Si | Si2  | 1.0 | 0.33145 | 0.53180 | 0.05344 | 1.0000 |
| Si | Si3  | 1.0 | 0.70808 | 0.80236 | 0.05409 | 1.0000 |
| Si | Si4  | 1.0 | 0.70996 | 0.54563 | 0.05974 | 1.0000 |
| Si | Si5  | 1.0 | 0.95212 | 0.80394 | 0.05367 | 1.0000 |
| Si | Si6  | 1.0 | 0.95490 | 0.54515 | 0.05529 | 1.0000 |
| Si | Si7  | 1.0 | 0.53027 | 0.85821 | 0.12778 | 1.0000 |
| Si | Si8  | 1.0 | 0.65645 | 0.19766 | 0.54447 | 1.0000 |
| Si | Si9  | 1.0 | 0.66588 | 0.45229 | 0.55809 | 1.0000 |
| Si | Si10 | 1.0 | 0.28096 | 0.19953 | 0.55800 | 1.0000 |

|    |      |     |         |         |         |        |
|----|------|-----|---------|---------|---------|--------|
| Si | Si11 | 1.0 | 0.29007 | 0.45619 | 0.55719 | 1.0000 |
| Si | Si12 | 1.0 | 0.03946 | 0.19739 | 0.54635 | 1.0000 |
| Si | Si13 | 1.0 | 0.04813 | 0.45609 | 0.55772 | 1.0000 |
| Si | Si14 | 1.0 | 0.21584 | 0.34383 | 0.30942 | 1.0000 |
| Si | Si15 | 1.0 | 0.46575 | 0.35126 | 0.30381 | 1.0000 |
| Si | Si16 | 1.0 | 0.20380 | 0.70963 | 0.30458 | 1.0000 |
| Si | Si17 | 1.0 | 0.45914 | 0.71363 | 0.31004 | 1.0000 |
| Si | Si18 | 1.0 | 0.19966 | 0.95286 | 0.30340 | 1.0000 |
| Si | Si19 | 1.0 | 0.45751 | 0.95719 | 0.30603 | 1.0000 |
| Si | Si20 | 1.0 | 0.14704 | 0.53068 | 0.37994 | 1.0000 |
| Si | Si21 | 1.0 | 0.79550 | 0.65632 | 0.80528 | 1.0000 |
| Si | Si22 | 1.0 | 0.54330 | 0.65290 | 0.80733 | 1.0000 |
| Si | Si23 | 1.0 | 0.78114 | 0.28251 | 0.81829 | 1.0000 |
| Si | Si24 | 1.0 | 0.53156 | 0.27897 | 0.80761 | 1.0000 |
| Si | Si25 | 1.0 | 0.78280 | 0.03312 | 0.81130 | 1.0000 |
| Si | Si26 | 1.0 | 0.53444 | 0.03238 | 0.79951 | 1.0000 |
| Si | Si27 | 1.0 | 0.85054 | 0.47271 | 0.88019 | 1.0000 |
| Si | Si28 | 1.0 | 0.65881 | 0.78724 | 0.93973 | 1.0000 |
| Si | Si29 | 1.0 | 0.64962 | 0.53418 | 0.94674 | 1.0000 |
| Si | Si30 | 1.0 | 0.29050 | 0.79567 | 0.94451 | 1.0000 |
| Si | Si31 | 1.0 | 0.28539 | 0.54098 | 0.93931 | 1.0000 |
| Si | Si32 | 1.0 | 0.04902 | 0.80057 | 0.94726 | 1.0000 |
| Si | Si33 | 1.0 | 0.04371 | 0.54133 | 0.94678 | 1.0000 |
| Si | Si34 | 1.0 | 0.46964 | 0.85123 | 0.87033 | 1.0000 |
| Si | Si35 | 1.0 | 0.33789 | 0.20437 | 0.44562 | 1.0000 |
| Si | Si36 | 1.0 | 0.34188 | 0.45732 | 0.44472 | 1.0000 |
| Si | Si37 | 1.0 | 0.71887 | 0.21845 | 0.43248 | 1.0000 |
| Si | Si38 | 1.0 | 0.71966 | 0.47430 | 0.44540 | 1.0000 |
| Si | Si39 | 1.0 | 0.96286 | 0.21829 | 0.43659 | 1.0000 |
| Si | Si40 | 1.0 | 0.96180 | 0.47339 | 0.45049 | 1.0000 |
| Si | Si41 | 1.0 | 0.52313 | 0.15222 | 0.37096 | 1.0000 |
| Si | Si42 | 1.0 | 0.54439 | 0.33036 | 0.69400 | 1.0000 |
| Si | Si43 | 1.0 | 0.79793 | 0.71182 | 0.69213 | 1.0000 |
| Si | Si44 | 1.0 | 0.54320 | 0.70946 | 0.69435 | 1.0000 |

|    |      |     |         |         |         |        |
|----|------|-----|---------|---------|---------|--------|
| Si | Si45 | 1.0 | 0.54317 | 0.95491 | 0.69076 | 1.0000 |
| Si | Si46 | 1.0 | 0.21447 | 0.67249 | 0.19115 | 1.0000 |
| Si | Si47 | 1.0 | 0.46774 | 0.67098 | 0.19652 | 1.0000 |
| Si | Si48 | 1.0 | 0.20246 | 0.29361 | 0.19502 | 1.0000 |
| Si | Si49 | 1.0 | 0.45766 | 0.29180 | 0.19117 | 1.0000 |
| Si | Si50 | 1.0 | 0.20115 | 0.04744 | 0.19598 | 1.0000 |
| Si | Si51 | 1.0 | 0.45818 | 0.04560 | 0.19700 | 1.0000 |
| Si | Si52 | 1.0 | 0.14551 | 0.47130 | 0.12185 | 1.0000 |
| Si | Si53 | 1.0 | 0.13693 | 0.86380 | 0.12424 | 1.0000 |
| Si | Si54 | 1.0 | 0.52426 | 0.47509 | 0.12496 | 1.0000 |
| Si | Si55 | 1.0 | 0.47395 | 0.52363 | 0.62687 | 1.0000 |
| Si | Si56 | 1.0 | 0.15639 | 0.14017 | 0.37354 | 1.0000 |
| Si | Si57 | 1.0 | 0.53768 | 0.52826 | 0.37711 | 1.0000 |
| Si | Si58 | 1.0 | 0.86449 | 0.84217 | 0.87482 | 1.0000 |
| Si | Si59 | 1.0 | 0.47015 | 0.45833 | 0.87441 | 1.0000 |
| Si | Si60 | 1.0 | 0.79840 | 0.33597 | 0.70593 | 1.0000 |
| Si | Si61 | 1.0 | 0.79855 | 0.95496 | 0.70300 | 1.0000 |

T1T2T7T7:

data\_image0

\_chemical\_formula\_structural H4O128Al4Si60  
\_chemical\_formula\_sum "H4 O128 Al4 Si60"  
\_cell\_length\_a 12.5292  
\_cell\_length\_b 12.5772  
\_cell\_length\_c 26.4616  
\_cell\_angle\_alpha 89.8411  
\_cell\_angle\_beta 90.1105  
\_cell\_angle\_gamma 90.527

\_space\_group\_name\_H-M\_alt "P 1"  
\_space\_group\_IT\_number 1

loop\_

\_space\_group\_symop\_operation\_xyz  
'x, y, z'

loop\_

\_atom\_site\_type\_symbol  
\_atom\_site\_label  
\_atom\_site\_symmetry\_multiplicity  
\_atom\_site\_fract\_x  
\_atom\_site\_fract\_y  
\_atom\_site\_fract\_z  
\_atom\_site\_occupancy  
H H1 1.0 0.48380 0.14873 0.53314 1.0000  
H H2 1.0 0.85470 0.51676 0.71576 1.0000  
H H3 1.0 0.56267 0.83210 0.34878 1.0000  
H H4 1.0 0.87268 0.16719 0.86166 1.0000  
O O1 1.0 0.29791 0.65817 0.06335 1.0000  
O O2 1.0 0.34606 0.81306 0.99794 1.0000  
O O3 1.0 0.23649 0.85559 0.08066 1.0000  
O O4 1.0 0.44330 0.80681 0.08523 1.0000

|   |     |     |         |         |         |        |
|---|-----|-----|---------|---------|---------|--------|
| O | O5  | 1.0 | 0.34097 | 0.50430 | 0.99654 | 1.0000 |
| O | O6  | 1.0 | 0.23084 | 0.46151 | 0.07928 | 1.0000 |
| O | O7  | 1.0 | 0.44012 | 0.50607 | 0.08284 | 1.0000 |
| O | O8  | 1.0 | 0.70068 | 0.67394 | 0.06269 | 1.0000 |
| O | O9  | 1.0 | 0.83452 | 0.83842 | 0.05815 | 1.0000 |
| O | O10 | 1.0 | 0.64474 | 0.86260 | 0.09756 | 1.0000 |
| O | O11 | 1.0 | 0.83303 | 0.50790 | 0.06508 | 1.0000 |
| O | O12 | 1.0 | 0.64419 | 0.49079 | 0.10481 | 1.0000 |
| O | O13 | 1.0 | 0.96667 | 0.67199 | 0.05716 | 1.0000 |
| O | O14 | 1.0 | 0.02590 | 0.85545 | 0.09635 | 1.0000 |
| O | O15 | 1.0 | 0.02640 | 0.49445 | 0.10233 | 1.0000 |
| O | O16 | 1.0 | 0.63372 | 0.33625 | 0.55039 | 1.0000 |
| O | O17 | 1.0 | 0.68739 | 0.17329 | 0.49102 | 1.0000 |
| O | O18 | 1.0 | 0.73937 | 0.16933 | 0.58911 | 1.0000 |
| O | O19 | 1.0 | 0.53841 | 0.14920 | 0.56045 | 1.0000 |
| O | O20 | 1.0 | 0.68487 | 0.51072 | 0.49874 | 1.0000 |
| O | O21 | 1.0 | 0.77216 | 0.47187 | 0.58985 | 1.0000 |
| O | O22 | 1.0 | 0.56511 | 0.52419 | 0.57872 | 1.0000 |
| O | O23 | 1.0 | 0.28450 | 0.32871 | 0.56774 | 1.0000 |
| O | O24 | 1.0 | 0.15409 | 0.15890 | 0.55881 | 1.0000 |
| O | O25 | 1.0 | 0.33893 | 0.14400 | 0.60741 | 1.0000 |
| O | O26 | 1.0 | 0.17194 | 0.50056 | 0.54923 | 1.0000 |
| O | O27 | 1.0 | 0.35592 | 0.51772 | 0.59848 | 1.0000 |
| O | O28 | 1.0 | 0.03926 | 0.33299 | 0.55340 | 1.0000 |
| O | O29 | 1.0 | 0.95292 | 0.15718 | 0.59174 | 1.0000 |
| O | O30 | 1.0 | 0.99941 | 0.50454 | 0.60747 | 1.0000 |
| O | O31 | 1.0 | 0.34202 | 0.37577 | 0.31076 | 1.0000 |
| O | O32 | 1.0 | 0.17409 | 0.33683 | 0.25165 | 1.0000 |
| O | O33 | 1.0 | 0.20595 | 0.21855 | 0.33332 | 1.0000 |
| O | O34 | 1.0 | 0.14680 | 0.42182 | 0.34159 | 1.0000 |
| O | O35 | 1.0 | 0.49568 | 0.32803 | 0.24418 | 1.0000 |
| O | O36 | 1.0 | 0.48590 | 0.22914 | 0.33234 | 1.0000 |
| O | O37 | 1.0 | 0.54223 | 0.43576 | 0.32583 | 1.0000 |
| O | O38 | 1.0 | 0.32935 | 0.72260 | 0.31088 | 1.0000 |

|   |     |     |         |         |         |        |
|---|-----|-----|---------|---------|---------|--------|
| O | O39 | 1.0 | 0.14837 | 0.82923 | 0.31105 | 1.0000 |
| O | O40 | 1.0 | 0.15471 | 0.63422 | 0.34680 | 1.0000 |
| O | O41 | 1.0 | 0.49374 | 0.63085 | 0.35739 | 1.0000 |
| O | O42 | 1.0 | 0.31884 | 0.95840 | 0.31007 | 1.0000 |
| O | O43 | 1.0 | 0.13423 | 0.02152 | 0.34857 | 1.0000 |
| O | O44 | 1.0 | 0.51543 | 0.02745 | 0.35670 | 1.0000 |
| O | O45 | 1.0 | 0.67515 | 0.66663 | 0.81426 | 1.0000 |
| O | O46 | 1.0 | 0.82582 | 0.65501 | 0.74111 | 1.0000 |
| O | O47 | 1.0 | 0.85704 | 0.77194 | 0.82409 | 1.0000 |
| O | O48 | 1.0 | 0.85333 | 0.55844 | 0.82672 | 1.0000 |
| O | O49 | 1.0 | 0.52151 | 0.64553 | 0.74581 | 1.0000 |
| O | O50 | 1.0 | 0.49151 | 0.76457 | 0.82782 | 1.0000 |
| O | O51 | 1.0 | 0.49935 | 0.55555 | 0.83427 | 1.0000 |
| O | O52 | 1.0 | 0.65525 | 0.28559 | 0.81191 | 1.0000 |
| O | O53 | 1.0 | 0.82709 | 0.36389 | 0.86041 | 1.0000 |
| O | O54 | 1.0 | 0.47842 | 0.16420 | 0.80952 | 1.0000 |
| O | O55 | 1.0 | 0.47188 | 0.35028 | 0.84856 | 1.0000 |
| O | O56 | 1.0 | 0.64807 | 0.03932 | 0.80844 | 1.0000 |
| O | O57 | 1.0 | 0.83495 | 0.96613 | 0.86190 | 1.0000 |
| O | O58 | 1.0 | 0.46074 | 0.97003 | 0.84093 | 1.0000 |
| O | O59 | 1.0 | 0.61773 | 0.66617 | 0.94065 | 1.0000 |
| O | O60 | 1.0 | 0.66309 | 0.83320 | 0.99848 | 1.0000 |
| O | O61 | 1.0 | 0.78066 | 0.79404 | 0.91739 | 1.0000 |
| O | O62 | 1.0 | 0.57820 | 0.86085 | 0.90771 | 1.0000 |
| O | O63 | 1.0 | 0.66298 | 0.50666 | 0.00480 | 1.0000 |
| O | O64 | 1.0 | 0.76663 | 0.52588 | 0.91831 | 1.0000 |
| O | O65 | 1.0 | 0.56081 | 0.46728 | 0.92052 | 1.0000 |
| O | O66 | 1.0 | 0.28863 | 0.65998 | 0.93378 | 1.0000 |
| O | O67 | 1.0 | 0.17294 | 0.83351 | 0.93967 | 1.0000 |
| O | O68 | 1.0 | 0.36575 | 0.84068 | 0.90016 | 1.0000 |
| O | O69 | 1.0 | 0.16338 | 0.48973 | 0.94077 | 1.0000 |
| O | O70 | 1.0 | 0.35229 | 0.47717 | 0.89794 | 1.0000 |
| O | O71 | 1.0 | 0.04315 | 0.66386 | 0.94422 | 1.0000 |
| O | O72 | 1.0 | 0.98361 | 0.83948 | 0.89727 | 1.0000 |

|   |      |     |         |         |         |        |
|---|------|-----|---------|---------|---------|--------|
| O | O73  | 1.0 | 0.97092 | 0.48503 | 0.90312 | 1.0000 |
| O | O74  | 1.0 | 0.30508 | 0.31894 | 0.43751 | 1.0000 |
| O | O75  | 1.0 | 0.34133 | 0.16965 | 0.50876 | 1.0000 |
| O | O76  | 1.0 | 0.24258 | 0.12227 | 0.42122 | 1.0000 |
| O | O77  | 1.0 | 0.45312 | 0.16736 | 0.42730 | 1.0000 |
| O | O78  | 1.0 | 0.35575 | 0.47358 | 0.50184 | 1.0000 |
| O | O79  | 1.0 | 0.25817 | 0.51844 | 0.41444 | 1.0000 |
| O | O80  | 1.0 | 0.45973 | 0.45959 | 0.41698 | 1.0000 |
| O | O81  | 1.0 | 0.71160 | 0.34844 | 0.43667 | 1.0000 |
| O | O82  | 1.0 | 0.84417 | 0.18491 | 0.42369 | 1.0000 |
| O | O83  | 1.0 | 0.64845 | 0.17181 | 0.39163 | 1.0000 |
| O | O84  | 1.0 | 0.84476 | 0.51463 | 0.43207 | 1.0000 |
| O | O85  | 1.0 | 0.65258 | 0.53473 | 0.39932 | 1.0000 |
| O | O86  | 1.0 | 0.97362 | 0.34801 | 0.44270 | 1.0000 |
| O | O87  | 1.0 | 0.04426 | 0.17843 | 0.39611 | 1.0000 |
| O | O88  | 1.0 | 0.04703 | 0.53349 | 0.41269 | 1.0000 |
| O | O89  | 1.0 | 0.67435 | 0.35972 | 0.69648 | 1.0000 |
| O | O90  | 1.0 | 0.83387 | 0.31924 | 0.76054 | 1.0000 |
| O | O91  | 1.0 | 0.84908 | 0.25563 | 0.66448 | 1.0000 |
| O | O92  | 1.0 | 0.49812 | 0.33288 | 0.74883 | 1.0000 |
| O | O93  | 1.0 | 0.52746 | 0.22938 | 0.66067 | 1.0000 |
| O | O94  | 1.0 | 0.49239 | 0.43945 | 0.66462 | 1.0000 |
| O | O95  | 1.0 | 0.66937 | 0.71572 | 0.68138 | 1.0000 |
| O | O96  | 1.0 | 0.84111 | 0.84476 | 0.69194 | 1.0000 |
| O | O97  | 1.0 | 0.85517 | 0.66178 | 0.64290 | 1.0000 |
| O | O98  | 1.0 | 0.49639 | 0.82889 | 0.69740 | 1.0000 |
| O | O99  | 1.0 | 0.48029 | 0.64763 | 0.64826 | 1.0000 |
| O | O100 | 1.0 | 0.66782 | 0.95709 | 0.69968 | 1.0000 |
| O | O101 | 1.0 | 0.83677 | 0.04193 | 0.65344 | 1.0000 |
| O | O102 | 1.0 | 0.50209 | 0.00410 | 0.64207 | 1.0000 |
| O | O103 | 1.0 | 0.34358 | 0.68858 | 0.18857 | 1.0000 |
| O | O104 | 1.0 | 0.17510 | 0.66278 | 0.24909 | 1.0000 |
| O | O105 | 1.0 | 0.15617 | 0.76965 | 0.16405 | 1.0000 |
| O | O106 | 1.0 | 0.18235 | 0.55919 | 0.16431 | 1.0000 |

|    |      |     |         |         |         |        |
|----|------|-----|---------|---------|---------|--------|
| O  | O107 | 1.0 | 0.49850 | 0.66516 | 0.25742 | 1.0000 |
| O  | O108 | 1.0 | 0.53814 | 0.76535 | 0.17182 | 1.0000 |
| O  | O109 | 1.0 | 0.50570 | 0.55414 | 0.17505 | 1.0000 |
| O  | O110 | 1.0 | 0.32734 | 0.29620 | 0.18512 | 1.0000 |
| O  | O111 | 1.0 | 0.15940 | 0.16576 | 0.19261 | 1.0000 |
| O  | O112 | 1.0 | 0.13532 | 0.35529 | 0.15388 | 1.0000 |
| O  | O113 | 1.0 | 0.49193 | 0.16079 | 0.18272 | 1.0000 |
| O  | O114 | 1.0 | 0.51141 | 0.35366 | 0.14520 | 1.0000 |
| O  | O115 | 1.0 | 0.32535 | 0.03353 | 0.19418 | 1.0000 |
| O  | O116 | 1.0 | 0.14541 | 0.97947 | 0.14946 | 1.0000 |
| O  | O117 | 1.0 | 0.49746 | 0.96753 | 0.14653 | 1.0000 |
| O  | O118 | 1.0 | 0.00116 | 0.83766 | 0.99713 | 1.0000 |
| O  | O119 | 1.0 | 0.99763 | 0.49788 | 0.00270 | 1.0000 |
| O  | O120 | 1.0 | 0.99369 | 0.16822 | 0.49416 | 1.0000 |
| O  | O121 | 1.0 | 0.98146 | 0.50932 | 0.50758 | 1.0000 |
| O  | O122 | 1.0 | 0.15168 | 0.99351 | 0.24941 | 1.0000 |
| O  | O123 | 1.0 | 0.50134 | 0.99397 | 0.24665 | 1.0000 |
| O  | O124 | 1.0 | 0.84072 | 0.01450 | 0.75233 | 1.0000 |
| O  | O125 | 1.0 | 0.48650 | 0.01265 | 0.74263 | 1.0000 |
| O  | O126 | 1.0 | 0.85864 | 0.46140 | 0.68896 | 1.0000 |
| O  | O127 | 1.0 | 0.50710 | 0.82721 | 0.32299 | 1.0000 |
| O  | O128 | 1.0 | 0.82775 | 0.16958 | 0.83153 | 1.0000 |
| Al | Al1  | 1.0 | 0.47051 | 0.13046 | 0.62449 | 1.0000 |
| Al | Al2  | 1.0 | 0.87145 | 0.53202 | 0.62514 | 1.0000 |
| Al | Al3  | 1.0 | 0.45466 | 0.96517 | 0.30631 | 1.0000 |
| Al | Al4  | 1.0 | 0.78337 | 0.03230 | 0.81053 | 1.0000 |
| Si | Si1  | 1.0 | 0.33108 | 0.78377 | 0.05720 | 1.0000 |
| Si | Si2  | 1.0 | 0.32783 | 0.53280 | 0.05589 | 1.0000 |
| Si | Si3  | 1.0 | 0.71062 | 0.80164 | 0.05384 | 1.0000 |
| Si | Si4  | 1.0 | 0.71032 | 0.54571 | 0.05910 | 1.0000 |
| Si | Si5  | 1.0 | 0.95676 | 0.80011 | 0.05200 | 1.0000 |
| Si | Si6  | 1.0 | 0.95618 | 0.54363 | 0.05669 | 1.0000 |
| Si | Si7  | 1.0 | 0.53007 | 0.85201 | 0.12569 | 1.0000 |
| Si | Si8  | 1.0 | 0.65614 | 0.21093 | 0.54741 | 1.0000 |



|    |      |     |         |         |         |        |
|----|------|-----|---------|---------|---------|--------|
| Si | Si9  | 1.0 | 0.66712 | 0.46274 | 0.55559 | 1.0000 |
| Si | Si10 | 1.0 | 0.27737 | 0.20011 | 0.56219 | 1.0000 |
| Si | Si11 | 1.0 | 0.29142 | 0.45459 | 0.55482 | 1.0000 |
| Si | Si12 | 1.0 | 0.03493 | 0.20526 | 0.54995 | 1.0000 |
| Si | Si13 | 1.0 | 0.04815 | 0.46219 | 0.55587 | 1.0000 |
| Si | Si14 | 1.0 | 0.21676 | 0.33749 | 0.30958 | 1.0000 |
| Si | Si15 | 1.0 | 0.46648 | 0.34065 | 0.30330 | 1.0000 |
| Si | Si16 | 1.0 | 0.20009 | 0.71320 | 0.30426 | 1.0000 |
| Si | Si17 | 1.0 | 0.19180 | 0.95173 | 0.30464 | 1.0000 |
| Si | Si18 | 1.0 | 0.15257 | 0.52499 | 0.37867 | 1.0000 |
| Si | Si19 | 1.0 | 0.80190 | 0.66531 | 0.80173 | 1.0000 |
| Si | Si20 | 1.0 | 0.54631 | 0.65890 | 0.80544 | 1.0000 |
| Si | Si21 | 1.0 | 0.52490 | 0.28275 | 0.80377 | 1.0000 |
| Si | Si22 | 1.0 | 0.52194 | 0.04447 | 0.79975 | 1.0000 |
| Si | Si23 | 1.0 | 0.85371 | 0.48614 | 0.87773 | 1.0000 |
| Si | Si24 | 1.0 | 0.66039 | 0.78977 | 0.94059 | 1.0000 |
| Si | Si25 | 1.0 | 0.65188 | 0.54196 | 0.94607 | 1.0000 |
| Si | Si26 | 1.0 | 0.29316 | 0.78694 | 0.94311 | 1.0000 |
| Si | Si27 | 1.0 | 0.28590 | 0.53303 | 0.94255 | 1.0000 |
| Si | Si28 | 1.0 | 0.05011 | 0.79301 | 0.94456 | 1.0000 |
| Si | Si29 | 1.0 | 0.04382 | 0.53551 | 0.94808 | 1.0000 |
| Si | Si30 | 1.0 | 0.47557 | 0.85810 | 0.86936 | 1.0000 |
| Si | Si31 | 1.0 | 0.33471 | 0.19436 | 0.44803 | 1.0000 |
| Si | Si32 | 1.0 | 0.34359 | 0.44294 | 0.44285 | 1.0000 |
| Si | Si33 | 1.0 | 0.72300 | 0.22043 | 0.43564 | 1.0000 |
| Si | Si34 | 1.0 | 0.72333 | 0.47642 | 0.44272 | 1.0000 |
| Si | Si35 | 1.0 | 0.96480 | 0.21989 | 0.43949 | 1.0000 |
| Si | Si36 | 1.0 | 0.96217 | 0.47544 | 0.44930 | 1.0000 |
| Si | Si37 | 1.0 | 0.52502 | 0.14718 | 0.37646 | 1.0000 |
| Si | Si38 | 1.0 | 0.54507 | 0.33698 | 0.69136 | 1.0000 |
| Si | Si39 | 1.0 | 0.79816 | 0.72303 | 0.68783 | 1.0000 |
| Si | Si40 | 1.0 | 0.54240 | 0.71024 | 0.69299 | 1.0000 |
| Si | Si41 | 1.0 | 0.79683 | 0.96555 | 0.70009 | 1.0000 |
| Si | Si42 | 1.0 | 0.53858 | 0.95181 | 0.69429 | 1.0000 |

|    |      |     |         |         |         |        |
|----|------|-----|---------|---------|---------|--------|
| Si | Si43 | 1.0 | 0.21442 | 0.67014 | 0.19082 | 1.0000 |
| Si | Si44 | 1.0 | 0.47052 | 0.66831 | 0.19699 | 1.0000 |
| Si | Si45 | 1.0 | 0.19997 | 0.28780 | 0.19609 | 1.0000 |
| Si | Si46 | 1.0 | 0.45596 | 0.28302 | 0.18954 | 1.0000 |
| Si | Si47 | 1.0 | 0.19699 | 0.04297 | 0.19693 | 1.0000 |
| Si | Si48 | 1.0 | 0.45527 | 0.03802 | 0.19397 | 1.0000 |
| Si | Si49 | 1.0 | 0.14353 | 0.46836 | 0.12478 | 1.0000 |
| Si | Si50 | 1.0 | 0.14207 | 0.86440 | 0.12268 | 1.0000 |
| Si | Si51 | 1.0 | 0.52461 | 0.47600 | 0.12697 | 1.0000 |
| Si | Si52 | 1.0 | 0.84483 | 0.15475 | 0.62491 | 1.0000 |
| Si | Si53 | 1.0 | 0.47455 | 0.53122 | 0.62243 | 1.0000 |
| Si | Si54 | 1.0 | 0.15660 | 0.13542 | 0.37491 | 1.0000 |
| Si | Si55 | 1.0 | 0.53636 | 0.51359 | 0.37470 | 1.0000 |
| Si | Si56 | 1.0 | 0.86252 | 0.84549 | 0.87531 | 1.0000 |
| Si | Si57 | 1.0 | 0.47155 | 0.46469 | 0.87558 | 1.0000 |
| Si | Si58 | 1.0 | 0.79997 | 0.34261 | 0.70194 | 1.0000 |
| Si | Si59 | 1.0 | 0.45470 | 0.70412 | 0.31130 | 1.0000 |
| Si | Si60 | 1.0 | 0.78199 | 0.29134 | 0.81507 | 1.0000 |

T1T7T7T7:

data\_image0

\_chemical\_formula\_structural H4O128Al4Si60  
\_chemical\_formula\_sum "H4 O128 Al4 Si60"  
\_cell\_length\_a 12.5214  
\_cell\_length\_b 12.576  
\_cell\_length\_c 26.4428  
\_cell\_angle\_alpha 89.4627  
\_cell\_angle\_beta 89.7907  
\_cell\_angle\_gamma 90.8127

\_space\_group\_name\_H-M\_alt "P 1"  
\_space\_group\_IT\_number 1

loop\_

\_space\_group\_symop\_operation\_xyz  
'x, y, z'

loop\_

\_atom\_site\_type\_symbol  
\_atom\_site\_label  
\_atom\_site\_symmetry\_multiplicity  
\_atom\_site\_fract\_x  
\_atom\_site\_fract\_y  
\_atom\_site\_fract\_z  
\_atom\_site\_occupancy  
H H1 1.0 0.47743 0.14777 0.53446 1.0000  
H H2 1.0 0.85694 0.51818 0.71456 1.0000  
H H3 1.0 0.52152 0.84307 0.03330 1.0000  
H H4 1.0 0.10696 0.82440 0.35239 1.0000  
O O1 1.0 0.32897 0.67252 0.05766 1.0000  
O O2 1.0 0.33378 0.82652 0.98670 1.0000  
O O3 1.0 0.26100 0.86522 0.08003 1.0000  
O O4 1.0 0.31658 0.49100 0.00627 1.0000

|   |     |     |         |         |         |        |
|---|-----|-----|---------|---------|---------|--------|
| O | O5  | 1.0 | 0.25456 | 0.49377 | 0.10100 | 1.0000 |
| O | O6  | 1.0 | 0.45951 | 0.51376 | 0.07758 | 1.0000 |
| O | O7  | 1.0 | 0.72165 | 0.65739 | 0.06197 | 1.0000 |
| O | O8  | 1.0 | 0.85152 | 0.82526 | 0.05431 | 1.0000 |
| O | O9  | 1.0 | 0.66702 | 0.83939 | 0.10566 | 1.0000 |
| O | O10 | 1.0 | 0.84494 | 0.48795 | 0.06379 | 1.0000 |
| O | O11 | 1.0 | 0.65518 | 0.47378 | 0.10320 | 1.0000 |
| O | O12 | 1.0 | 0.97749 | 0.65595 | 0.05341 | 1.0000 |
| O | O13 | 1.0 | 0.05005 | 0.83634 | 0.09010 | 1.0000 |
| O | O14 | 1.0 | 0.04306 | 0.47484 | 0.09258 | 1.0000 |
| O | O15 | 1.0 | 0.62768 | 0.33495 | 0.55426 | 1.0000 |
| O | O16 | 1.0 | 0.67814 | 0.17839 | 0.49150 | 1.0000 |
| O | O17 | 1.0 | 0.73567 | 0.16360 | 0.58856 | 1.0000 |
| O | O18 | 1.0 | 0.53305 | 0.14445 | 0.56154 | 1.0000 |
| O | O19 | 1.0 | 0.66929 | 0.51237 | 0.50116 | 1.0000 |
| O | O20 | 1.0 | 0.77045 | 0.47192 | 0.58846 | 1.0000 |
| O | O21 | 1.0 | 0.56328 | 0.52357 | 0.58480 | 1.0000 |
| O | O22 | 1.0 | 0.28240 | 0.33091 | 0.57036 | 1.0000 |
| O | O23 | 1.0 | 0.15001 | 0.16659 | 0.55487 | 1.0000 |
| O | O24 | 1.0 | 0.33048 | 0.14266 | 0.60763 | 1.0000 |
| O | O25 | 1.0 | 0.17217 | 0.50423 | 0.55132 | 1.0000 |
| O | O26 | 1.0 | 0.35307 | 0.52028 | 0.60130 | 1.0000 |
| O | O27 | 1.0 | 0.03259 | 0.34081 | 0.55408 | 1.0000 |
| O | O28 | 1.0 | 0.95058 | 0.15992 | 0.59152 | 1.0000 |
| O | O29 | 1.0 | 0.99404 | 0.51787 | 0.60424 | 1.0000 |
| O | O30 | 1.0 | 0.33257 | 0.38442 | 0.30958 | 1.0000 |
| O | O31 | 1.0 | 0.16360 | 0.32657 | 0.25357 | 1.0000 |
| O | O32 | 1.0 | 0.20677 | 0.22210 | 0.33816 | 1.0000 |
| O | O33 | 1.0 | 0.13609 | 0.42188 | 0.34057 | 1.0000 |
| O | O34 | 1.0 | 0.49425 | 0.34439 | 0.24628 | 1.0000 |
| O | O35 | 1.0 | 0.47410 | 0.23874 | 0.33401 | 1.0000 |
| O | O36 | 1.0 | 0.53181 | 0.44417 | 0.33069 | 1.0000 |
| O | O37 | 1.0 | 0.33762 | 0.73062 | 0.30367 | 1.0000 |
| O | O38 | 1.0 | 0.18067 | 0.62776 | 0.35158 | 1.0000 |

|   |     |     |         |         |         |        |
|---|-----|-----|---------|---------|---------|--------|
| O | O39 | 1.0 | 0.51434 | 0.84421 | 0.31191 | 1.0000 |
| O | O40 | 1.0 | 0.50679 | 0.65128 | 0.34975 | 1.0000 |
| O | O41 | 1.0 | 0.34173 | 0.96925 | 0.31338 | 1.0000 |
| O | O42 | 1.0 | 0.13809 | 0.02538 | 0.35660 | 1.0000 |
| O | O43 | 1.0 | 0.53061 | 0.03753 | 0.34453 | 1.0000 |
| O | O44 | 1.0 | 0.67463 | 0.61961 | 0.81019 | 1.0000 |
| O | O45 | 1.0 | 0.83030 | 0.65588 | 0.74072 | 1.0000 |
| O | O46 | 1.0 | 0.82687 | 0.76565 | 0.82615 | 1.0000 |
| O | O47 | 1.0 | 0.86977 | 0.55573 | 0.82480 | 1.0000 |
| O | O48 | 1.0 | 0.50743 | 0.64743 | 0.75070 | 1.0000 |
| O | O49 | 1.0 | 0.53966 | 0.77390 | 0.82989 | 1.0000 |
| O | O50 | 1.0 | 0.47935 | 0.57255 | 0.84361 | 1.0000 |
| O | O51 | 1.0 | 0.65488 | 0.28738 | 0.80774 | 1.0000 |
| O | O52 | 1.0 | 0.82197 | 0.16231 | 0.82478 | 1.0000 |
| O | O53 | 1.0 | 0.82034 | 0.35898 | 0.85723 | 1.0000 |
| O | O54 | 1.0 | 0.48586 | 0.16226 | 0.81857 | 1.0000 |
| O | O55 | 1.0 | 0.47329 | 0.36049 | 0.84428 | 1.0000 |
| O | O56 | 1.0 | 0.65502 | 0.03292 | 0.81172 | 1.0000 |
| O | O57 | 1.0 | 0.83219 | 0.96481 | 0.85532 | 1.0000 |
| O | O58 | 1.0 | 0.47105 | 0.96763 | 0.84915 | 1.0000 |
| O | O59 | 1.0 | 0.63038 | 0.65957 | 0.94276 | 1.0000 |
| O | O60 | 1.0 | 0.65996 | 0.82082 | 0.00713 | 1.0000 |
| O | O61 | 1.0 | 0.77232 | 0.81285 | 0.92126 | 1.0000 |
| O | O62 | 1.0 | 0.56162 | 0.85310 | 0.92217 | 1.0000 |
| O | O63 | 1.0 | 0.67669 | 0.49456 | 0.00271 | 1.0000 |
| O | O64 | 1.0 | 0.78341 | 0.52708 | 0.91640 | 1.0000 |
| O | O65 | 1.0 | 0.58005 | 0.46303 | 0.91559 | 1.0000 |
| O | O66 | 1.0 | 0.29351 | 0.64676 | 0.94043 | 1.0000 |
| O | O67 | 1.0 | 0.17028 | 0.81441 | 0.92270 | 1.0000 |
| O | O68 | 1.0 | 0.36665 | 0.80781 | 0.88744 | 1.0000 |
| O | O69 | 1.0 | 0.16686 | 0.47853 | 0.93551 | 1.0000 |
| O | O70 | 1.0 | 0.36765 | 0.46058 | 0.91103 | 1.0000 |
| O | O71 | 1.0 | 0.03773 | 0.64868 | 0.93326 | 1.0000 |
| O | O72 | 1.0 | 0.97268 | 0.83077 | 0.89279 | 1.0000 |

|   |      |     |         |         |         |        |
|---|------|-----|---------|---------|---------|--------|
| O | O73  | 1.0 | 0.97936 | 0.46157 | 0.89671 | 1.0000 |
| O | O74  | 1.0 | 0.34224 | 0.32096 | 0.43537 | 1.0000 |
| O | O75  | 1.0 | 0.34637 | 0.17531 | 0.51009 | 1.0000 |
| O | O76  | 1.0 | 0.22437 | 0.14303 | 0.43061 | 1.0000 |
| O | O77  | 1.0 | 0.43895 | 0.13829 | 0.42227 | 1.0000 |
| O | O78  | 1.0 | 0.35662 | 0.47366 | 0.50439 | 1.0000 |
| O | O79  | 1.0 | 0.22595 | 0.49278 | 0.42596 | 1.0000 |
| O | O80  | 1.0 | 0.43591 | 0.50678 | 0.41457 | 1.0000 |
| O | O81  | 1.0 | 0.70224 | 0.35600 | 0.43774 | 1.0000 |
| O | O82  | 1.0 | 0.83406 | 0.19374 | 0.42378 | 1.0000 |
| O | O83  | 1.0 | 0.63681 | 0.18179 | 0.39275 | 1.0000 |
| O | O84  | 1.0 | 0.83370 | 0.52464 | 0.43711 | 1.0000 |
| O | O85  | 1.0 | 0.64262 | 0.54380 | 0.40224 | 1.0000 |
| O | O86  | 1.0 | 0.96486 | 0.35790 | 0.44061 | 1.0000 |
| O | O87  | 1.0 | 0.03270 | 0.18633 | 0.39486 | 1.0000 |
| O | O88  | 1.0 | 0.02802 | 0.54430 | 0.40448 | 1.0000 |
| O | O89  | 1.0 | 0.66921 | 0.36239 | 0.69665 | 1.0000 |
| O | O90  | 1.0 | 0.83415 | 0.32180 | 0.75805 | 1.0000 |
| O | O91  | 1.0 | 0.84252 | 0.26187 | 0.66136 | 1.0000 |
| O | O92  | 1.0 | 0.49044 | 0.31493 | 0.74754 | 1.0000 |
| O | O93  | 1.0 | 0.52442 | 0.23440 | 0.65625 | 1.0000 |
| O | O94  | 1.0 | 0.48372 | 0.44202 | 0.67028 | 1.0000 |
| O | O95  | 1.0 | 0.66300 | 0.71788 | 0.68948 | 1.0000 |
| O | O96  | 1.0 | 0.83503 | 0.84762 | 0.69285 | 1.0000 |
| O | O97  | 1.0 | 0.84171 | 0.66644 | 0.64155 | 1.0000 |
| O | O98  | 1.0 | 0.49012 | 0.83104 | 0.70203 | 1.0000 |
| O | O99  | 1.0 | 0.47628 | 0.64987 | 0.65218 | 1.0000 |
| O | O100 | 1.0 | 0.66162 | 0.96240 | 0.69989 | 1.0000 |
| O | O101 | 1.0 | 0.83616 | 0.04857 | 0.65758 | 1.0000 |
| O | O102 | 1.0 | 0.48813 | 0.00798 | 0.64842 | 1.0000 |
| O | O103 | 1.0 | 0.32927 | 0.62766 | 0.19613 | 1.0000 |
| O | O104 | 1.0 | 0.16220 | 0.68032 | 0.25277 | 1.0000 |
| O | O105 | 1.0 | 0.18490 | 0.76658 | 0.16125 | 1.0000 |
| O | O106 | 1.0 | 0.13130 | 0.56292 | 0.17371 | 1.0000 |

|    |      |     |         |         |         |        |
|----|------|-----|---------|---------|---------|--------|
| O  | O107 | 1.0 | 0.50402 | 0.67555 | 0.25016 | 1.0000 |
| O  | O108 | 1.0 | 0.47064 | 0.76524 | 0.15926 | 1.0000 |
| O  | O109 | 1.0 | 0.52333 | 0.56100 | 0.17063 | 1.0000 |
| O  | O110 | 1.0 | 0.32546 | 0.29416 | 0.19135 | 1.0000 |
| O  | O111 | 1.0 | 0.15782 | 0.16020 | 0.19083 | 1.0000 |
| O  | O112 | 1.0 | 0.13955 | 0.35399 | 0.15554 | 1.0000 |
| O  | O113 | 1.0 | 0.49744 | 0.17223 | 0.18893 | 1.0000 |
| O  | O114 | 1.0 | 0.50194 | 0.35924 | 0.14536 | 1.0000 |
| O  | O115 | 1.0 | 0.32997 | 0.03949 | 0.18980 | 1.0000 |
| O  | O116 | 1.0 | 0.15046 | 0.97385 | 0.14699 | 1.0000 |
| O  | O117 | 1.0 | 0.51261 | 0.98696 | 0.14539 | 1.0000 |
| O  | O118 | 1.0 | 0.01634 | 0.81896 | 0.99154 | 1.0000 |
| O  | O119 | 1.0 | 0.99828 | 0.48613 | 0.99566 | 1.0000 |
| O  | O120 | 1.0 | 0.98424 | 0.17927 | 0.49363 | 1.0000 |
| O  | O121 | 1.0 | 0.98970 | 0.51878 | 0.50373 | 1.0000 |
| O  | O122 | 1.0 | 0.16140 | 0.98363 | 0.24712 | 1.0000 |
| O  | O123 | 1.0 | 0.50075 | 0.00065 | 0.24615 | 1.0000 |
| O  | O124 | 1.0 | 0.83038 | 0.01012 | 0.75600 | 1.0000 |
| O  | O125 | 1.0 | 0.48803 | 0.01258 | 0.74984 | 1.0000 |
| O  | O126 | 1.0 | 0.85497 | 0.46532 | 0.68684 | 1.0000 |
| O  | O127 | 1.0 | 0.46752 | 0.84223 | 0.06099 | 1.0000 |
| O  | O128 | 1.0 | 0.15897 | 0.82587 | 0.32486 | 1.0000 |
| Al | Al1  | 1.0 | 0.46221 | 0.13152 | 0.62504 | 1.0000 |
| Al | Al2  | 1.0 | 0.86561 | 0.53775 | 0.62354 | 1.0000 |
| Al | Al3  | 1.0 | 0.53707 | 0.86176 | 0.12477 | 1.0000 |
| Al | Al4  | 1.0 | 0.20570 | 0.96541 | 0.30781 | 1.0000 |
| Si | Si1  | 1.0 | 0.33952 | 0.54283 | 0.06095 | 1.0000 |
| Si | Si2  | 1.0 | 0.72721 | 0.78641 | 0.05937 | 1.0000 |
| Si | Si3  | 1.0 | 0.72365 | 0.52903 | 0.05792 | 1.0000 |
| Si | Si4  | 1.0 | 0.97327 | 0.78424 | 0.04764 | 1.0000 |
| Si | Si5  | 1.0 | 0.96568 | 0.52751 | 0.05144 | 1.0000 |
| Si | Si6  | 1.0 | 0.64982 | 0.20986 | 0.54903 | 1.0000 |
| Si | Si7  | 1.0 | 0.66066 | 0.46201 | 0.55802 | 1.0000 |
| Si | Si8  | 1.0 | 0.27425 | 0.20322 | 0.56200 | 1.0000 |

|    |      |     |         |         |         |        |
|----|------|-----|---------|---------|---------|--------|
| Si | Si9  | 1.0 | 0.29053 | 0.45691 | 0.55722 | 1.0000 |
| Si | Si10 | 1.0 | 0.02991 | 0.21302 | 0.54886 | 1.0000 |
| Si | Si11 | 1.0 | 0.04649 | 0.47029 | 0.55446 | 1.0000 |
| Si | Si12 | 1.0 | 0.21000 | 0.33759 | 0.31040 | 1.0000 |
| Si | Si13 | 1.0 | 0.45855 | 0.35180 | 0.30512 | 1.0000 |
| Si | Si14 | 1.0 | 0.46799 | 0.72563 | 0.30363 | 1.0000 |
| Si | Si15 | 1.0 | 0.46781 | 0.96416 | 0.30330 | 1.0000 |
| Si | Si16 | 1.0 | 0.14364 | 0.51881 | 0.38050 | 1.0000 |
| Si | Si17 | 1.0 | 0.79975 | 0.65156 | 0.80094 | 1.0000 |
| Si | Si18 | 1.0 | 0.54918 | 0.65336 | 0.80842 | 1.0000 |
| Si | Si19 | 1.0 | 0.78269 | 0.28180 | 0.81214 | 1.0000 |
| Si | Si20 | 1.0 | 0.52589 | 0.28158 | 0.80409 | 1.0000 |
| Si | Si21 | 1.0 | 0.78425 | 0.04143 | 0.81143 | 1.0000 |
| Si | Si22 | 1.0 | 0.52611 | 0.04344 | 0.80628 | 1.0000 |
| Si | Si23 | 1.0 | 0.86112 | 0.47578 | 0.87378 | 1.0000 |
| Si | Si24 | 1.0 | 0.65794 | 0.78615 | 0.94758 | 1.0000 |
| Si | Si25 | 1.0 | 0.66797 | 0.53549 | 0.94463 | 1.0000 |
| Si | Si26 | 1.0 | 0.29010 | 0.77403 | 0.93410 | 1.0000 |
| Si | Si27 | 1.0 | 0.28650 | 0.51937 | 0.94824 | 1.0000 |
| Si | Si28 | 1.0 | 0.04808 | 0.77744 | 0.93551 | 1.0000 |
| Si | Si29 | 1.0 | 0.04589 | 0.52045 | 0.94088 | 1.0000 |
| Si | Si30 | 1.0 | 0.48517 | 0.84971 | 0.87211 | 1.0000 |
| Si | Si31 | 1.0 | 0.33699 | 0.19441 | 0.44861 | 1.0000 |
| Si | Si32 | 1.0 | 0.34036 | 0.44839 | 0.44504 | 1.0000 |
| Si | Si33 | 1.0 | 0.71296 | 0.22822 | 0.43624 | 1.0000 |
| Si | Si34 | 1.0 | 0.71169 | 0.48379 | 0.44503 | 1.0000 |
| Si | Si35 | 1.0 | 0.95502 | 0.22944 | 0.43852 | 1.0000 |
| Si | Si36 | 1.0 | 0.95403 | 0.48530 | 0.44732 | 1.0000 |
| Si | Si37 | 1.0 | 0.51874 | 0.14928 | 0.37298 | 1.0000 |
| Si | Si38 | 1.0 | 0.54043 | 0.33566 | 0.69133 | 1.0000 |
| Si | Si39 | 1.0 | 0.79261 | 0.72469 | 0.68928 | 1.0000 |
| Si | Si40 | 1.0 | 0.53465 | 0.71176 | 0.69795 | 1.0000 |
| Si | Si41 | 1.0 | 0.79008 | 0.96720 | 0.70104 | 1.0000 |
| Si | Si42 | 1.0 | 0.53153 | 0.95420 | 0.69879 | 1.0000 |



|    |      |     |         |         |         |        |
|----|------|-----|---------|---------|---------|--------|
| Si | Si43 | 1.0 | 0.20422 | 0.66043 | 0.19489 | 1.0000 |
| Si | Si44 | 1.0 | 0.45706 | 0.66036 | 0.19319 | 1.0000 |
| Si | Si45 | 1.0 | 0.19743 | 0.28179 | 0.19810 | 1.0000 |
| Si | Si46 | 1.0 | 0.45469 | 0.29173 | 0.19318 | 1.0000 |
| Si | Si47 | 1.0 | 0.20077 | 0.03835 | 0.19512 | 1.0000 |
| Si | Si48 | 1.0 | 0.45983 | 0.04763 | 0.19196 | 1.0000 |
| Si | Si49 | 1.0 | 0.14253 | 0.47154 | 0.13081 | 1.0000 |
| Si | Si50 | 1.0 | 0.16041 | 0.86000 | 0.12025 | 1.0000 |
| Si | Si51 | 1.0 | 0.53395 | 0.47691 | 0.12508 | 1.0000 |
| Si | Si52 | 1.0 | 0.84154 | 0.15777 | 0.62456 | 1.0000 |
| Si | Si53 | 1.0 | 0.46987 | 0.53276 | 0.62695 | 1.0000 |
| Si | Si54 | 1.0 | 0.14944 | 0.14199 | 0.37973 | 1.0000 |
| Si | Si55 | 1.0 | 0.52883 | 0.53546 | 0.37382 | 1.0000 |
| Si | Si56 | 1.0 | 0.85066 | 0.84352 | 0.87381 | 1.0000 |
| Si | Si57 | 1.0 | 0.47656 | 0.46520 | 0.87848 | 1.0000 |
| Si | Si58 | 1.0 | 0.79581 | 0.34634 | 0.70071 | 1.0000 |
| Si | Si59 | 1.0 | 0.34281 | 0.79851 | 0.04639 | 1.0000 |
| Si | Si60 | 1.0 | 0.21248 | 0.70855 | 0.30702 | 1.0000 |

T2T2T7T7:

data\_image0

\_chemical\_formula\_structural H4O128Al4Si60  
\_chemical\_formula\_sum "H4 O128 Al4 Si60"  
\_cell\_length\_a 12.5214  
\_cell\_length\_b 12.576  
\_cell\_length\_c 26.4428  
\_cell\_angle\_alpha 89.4627  
\_cell\_angle\_beta 89.7907  
\_cell\_angle\_gamma 90.8127

\_space\_group\_name\_H-M\_alt "P 1"

\_space\_group\_IT\_number 1

loop\_

\_space\_group\_symop\_operation\_xyz

'x, y, z'

loop\_

\_atom\_site\_type\_symbol

\_atom\_site\_label

\_atom\_site\_symmetry\_multiplicity

\_atom\_site\_fract\_x

\_atom\_site\_fract\_y

\_atom\_site\_fract\_z

\_atom\_site\_occupancy

|   |    |     |         |         |         |        |
|---|----|-----|---------|---------|---------|--------|
| H | H1 | 1.0 | 0.47743 | 0.14777 | 0.53446 | 1.0000 |
| H | H2 | 1.0 | 0.85694 | 0.51818 | 0.71456 | 1.0000 |
| H | H3 | 1.0 | 0.52152 | 0.84307 | 0.03330 | 1.0000 |
| H | H4 | 1.0 | 0.10696 | 0.82440 | 0.35239 | 1.0000 |
| O | O1 | 1.0 | 0.32897 | 0.67252 | 0.05766 | 1.0000 |
| O | O2 | 1.0 | 0.33378 | 0.82652 | 0.98670 | 1.0000 |
| O | O3 | 1.0 | 0.26100 | 0.86522 | 0.08003 | 1.0000 |
| O | O4 | 1.0 | 0.31658 | 0.49100 | 0.00627 | 1.0000 |

|   |     |     |         |         |         |        |
|---|-----|-----|---------|---------|---------|--------|
| O | O5  | 1.0 | 0.25456 | 0.49377 | 0.10100 | 1.0000 |
| O | O6  | 1.0 | 0.45951 | 0.51376 | 0.07758 | 1.0000 |
| O | O7  | 1.0 | 0.72165 | 0.65739 | 0.06197 | 1.0000 |
| O | O8  | 1.0 | 0.85152 | 0.82526 | 0.05431 | 1.0000 |
| O | O9  | 1.0 | 0.66702 | 0.83939 | 0.10566 | 1.0000 |
| O | O10 | 1.0 | 0.84494 | 0.48795 | 0.06379 | 1.0000 |
| O | O11 | 1.0 | 0.65518 | 0.47378 | 0.10320 | 1.0000 |
| O | O12 | 1.0 | 0.97749 | 0.65595 | 0.05341 | 1.0000 |
| O | O13 | 1.0 | 0.05005 | 0.83634 | 0.09010 | 1.0000 |
| O | O14 | 1.0 | 0.04306 | 0.47484 | 0.09258 | 1.0000 |
| O | O15 | 1.0 | 0.62768 | 0.33495 | 0.55426 | 1.0000 |
| O | O16 | 1.0 | 0.67814 | 0.17839 | 0.49150 | 1.0000 |
| O | O17 | 1.0 | 0.73567 | 0.16360 | 0.58856 | 1.0000 |
| O | O18 | 1.0 | 0.53305 | 0.14445 | 0.56154 | 1.0000 |
| O | O19 | 1.0 | 0.66929 | 0.51237 | 0.50116 | 1.0000 |
| O | O20 | 1.0 | 0.77045 | 0.47192 | 0.58846 | 1.0000 |
| O | O21 | 1.0 | 0.56328 | 0.52357 | 0.58480 | 1.0000 |
| O | O22 | 1.0 | 0.28240 | 0.33091 | 0.57036 | 1.0000 |
| O | O23 | 1.0 | 0.15001 | 0.16659 | 0.55487 | 1.0000 |
| O | O24 | 1.0 | 0.33048 | 0.14266 | 0.60763 | 1.0000 |
| O | O25 | 1.0 | 0.17217 | 0.50423 | 0.55132 | 1.0000 |
| O | O26 | 1.0 | 0.35307 | 0.52028 | 0.60130 | 1.0000 |
| O | O27 | 1.0 | 0.03259 | 0.34081 | 0.55408 | 1.0000 |
| O | O28 | 1.0 | 0.95058 | 0.15992 | 0.59152 | 1.0000 |
| O | O29 | 1.0 | 0.99404 | 0.51787 | 0.60424 | 1.0000 |
| O | O30 | 1.0 | 0.33257 | 0.38442 | 0.30958 | 1.0000 |
| O | O31 | 1.0 | 0.16360 | 0.32657 | 0.25357 | 1.0000 |
| O | O32 | 1.0 | 0.20677 | 0.22210 | 0.33816 | 1.0000 |
| O | O33 | 1.0 | 0.13609 | 0.42188 | 0.34057 | 1.0000 |
| O | O34 | 1.0 | 0.49425 | 0.34439 | 0.24628 | 1.0000 |
| O | O35 | 1.0 | 0.47410 | 0.23874 | 0.33401 | 1.0000 |
| O | O36 | 1.0 | 0.53181 | 0.44417 | 0.33069 | 1.0000 |
| O | O37 | 1.0 | 0.33762 | 0.73062 | 0.30367 | 1.0000 |
| O | O38 | 1.0 | 0.18067 | 0.62776 | 0.35158 | 1.0000 |

|   |     |     |         |         |         |        |
|---|-----|-----|---------|---------|---------|--------|
| O | O39 | 1.0 | 0.51434 | 0.84421 | 0.31191 | 1.0000 |
| O | O40 | 1.0 | 0.50679 | 0.65128 | 0.34975 | 1.0000 |
| O | O41 | 1.0 | 0.34173 | 0.96925 | 0.31338 | 1.0000 |
| O | O42 | 1.0 | 0.13809 | 0.02538 | 0.35660 | 1.0000 |
| O | O43 | 1.0 | 0.53061 | 0.03753 | 0.34453 | 1.0000 |
| O | O44 | 1.0 | 0.67463 | 0.61961 | 0.81019 | 1.0000 |
| O | O45 | 1.0 | 0.83030 | 0.65588 | 0.74072 | 1.0000 |
| O | O46 | 1.0 | 0.82687 | 0.76565 | 0.82615 | 1.0000 |
| O | O47 | 1.0 | 0.86977 | 0.55573 | 0.82480 | 1.0000 |
| O | O48 | 1.0 | 0.50743 | 0.64743 | 0.75070 | 1.0000 |
| O | O49 | 1.0 | 0.53966 | 0.77390 | 0.82989 | 1.0000 |
| O | O50 | 1.0 | 0.47935 | 0.57255 | 0.84361 | 1.0000 |
| O | O51 | 1.0 | 0.65488 | 0.28738 | 0.80774 | 1.0000 |
| O | O52 | 1.0 | 0.82197 | 0.16231 | 0.82478 | 1.0000 |
| O | O53 | 1.0 | 0.82034 | 0.35898 | 0.85723 | 1.0000 |
| O | O54 | 1.0 | 0.48586 | 0.16226 | 0.81857 | 1.0000 |
| O | O55 | 1.0 | 0.47329 | 0.36049 | 0.84428 | 1.0000 |
| O | O56 | 1.0 | 0.65502 | 0.03292 | 0.81172 | 1.0000 |
| O | O57 | 1.0 | 0.83219 | 0.96481 | 0.85532 | 1.0000 |
| O | O58 | 1.0 | 0.47105 | 0.96763 | 0.84915 | 1.0000 |
| O | O59 | 1.0 | 0.63038 | 0.65957 | 0.94276 | 1.0000 |
| O | O60 | 1.0 | 0.65996 | 0.82082 | 0.00713 | 1.0000 |
| O | O61 | 1.0 | 0.77232 | 0.81285 | 0.92126 | 1.0000 |
| O | O62 | 1.0 | 0.56162 | 0.85310 | 0.92217 | 1.0000 |
| O | O63 | 1.0 | 0.67669 | 0.49456 | 0.00271 | 1.0000 |
| O | O64 | 1.0 | 0.78341 | 0.52708 | 0.91640 | 1.0000 |
| O | O65 | 1.0 | 0.58005 | 0.46303 | 0.91559 | 1.0000 |
| O | O66 | 1.0 | 0.29351 | 0.64676 | 0.94043 | 1.0000 |
| O | O67 | 1.0 | 0.17028 | 0.81441 | 0.92270 | 1.0000 |
| O | O68 | 1.0 | 0.36665 | 0.80781 | 0.88744 | 1.0000 |
| O | O69 | 1.0 | 0.16686 | 0.47853 | 0.93551 | 1.0000 |
| O | O70 | 1.0 | 0.36765 | 0.46058 | 0.91103 | 1.0000 |
| O | O71 | 1.0 | 0.03773 | 0.64868 | 0.93326 | 1.0000 |
| O | O72 | 1.0 | 0.97268 | 0.83077 | 0.89279 | 1.0000 |

|   |      |     |         |         |         |        |
|---|------|-----|---------|---------|---------|--------|
| O | O73  | 1.0 | 0.97936 | 0.46157 | 0.89671 | 1.0000 |
| O | O74  | 1.0 | 0.34224 | 0.32096 | 0.43537 | 1.0000 |
| O | O75  | 1.0 | 0.34637 | 0.17531 | 0.51009 | 1.0000 |
| O | O76  | 1.0 | 0.22437 | 0.14303 | 0.43061 | 1.0000 |
| O | O77  | 1.0 | 0.43895 | 0.13829 | 0.42227 | 1.0000 |
| O | O78  | 1.0 | 0.35662 | 0.47366 | 0.50439 | 1.0000 |
| O | O79  | 1.0 | 0.22595 | 0.49278 | 0.42596 | 1.0000 |
| O | O80  | 1.0 | 0.43591 | 0.50678 | 0.41457 | 1.0000 |
| O | O81  | 1.0 | 0.70224 | 0.35600 | 0.43774 | 1.0000 |
| O | O82  | 1.0 | 0.83406 | 0.19374 | 0.42378 | 1.0000 |
| O | O83  | 1.0 | 0.63681 | 0.18179 | 0.39275 | 1.0000 |
| O | O84  | 1.0 | 0.83370 | 0.52464 | 0.43711 | 1.0000 |
| O | O85  | 1.0 | 0.64262 | 0.54380 | 0.40224 | 1.0000 |
| O | O86  | 1.0 | 0.96486 | 0.35790 | 0.44061 | 1.0000 |
| O | O87  | 1.0 | 0.03270 | 0.18633 | 0.39486 | 1.0000 |
| O | O88  | 1.0 | 0.02802 | 0.54430 | 0.40448 | 1.0000 |
| O | O89  | 1.0 | 0.66921 | 0.36239 | 0.69665 | 1.0000 |
| O | O90  | 1.0 | 0.83415 | 0.32180 | 0.75805 | 1.0000 |
| O | O91  | 1.0 | 0.84252 | 0.26187 | 0.66136 | 1.0000 |
| O | O92  | 1.0 | 0.49044 | 0.31493 | 0.74754 | 1.0000 |
| O | O93  | 1.0 | 0.52442 | 0.23440 | 0.65625 | 1.0000 |
| O | O94  | 1.0 | 0.48372 | 0.44202 | 0.67028 | 1.0000 |
| O | O95  | 1.0 | 0.66300 | 0.71788 | 0.68948 | 1.0000 |
| O | O96  | 1.0 | 0.83503 | 0.84762 | 0.69285 | 1.0000 |
| O | O97  | 1.0 | 0.84171 | 0.66644 | 0.64155 | 1.0000 |
| O | O98  | 1.0 | 0.49012 | 0.83104 | 0.70203 | 1.0000 |
| O | O99  | 1.0 | 0.47628 | 0.64987 | 0.65218 | 1.0000 |
| O | O100 | 1.0 | 0.66162 | 0.96240 | 0.69989 | 1.0000 |
| O | O101 | 1.0 | 0.83616 | 0.04857 | 0.65758 | 1.0000 |
| O | O102 | 1.0 | 0.48813 | 0.00798 | 0.64842 | 1.0000 |
| O | O103 | 1.0 | 0.32927 | 0.62766 | 0.19613 | 1.0000 |
| O | O104 | 1.0 | 0.16220 | 0.68032 | 0.25277 | 1.0000 |
| O | O105 | 1.0 | 0.18490 | 0.76658 | 0.16125 | 1.0000 |
| O | O106 | 1.0 | 0.13130 | 0.56292 | 0.17371 | 1.0000 |

|    |      |     |         |         |         |        |
|----|------|-----|---------|---------|---------|--------|
| O  | O107 | 1.0 | 0.50402 | 0.67555 | 0.25016 | 1.0000 |
| O  | O108 | 1.0 | 0.47064 | 0.76524 | 0.15926 | 1.0000 |
| O  | O109 | 1.0 | 0.52333 | 0.56100 | 0.17063 | 1.0000 |
| O  | O110 | 1.0 | 0.32546 | 0.29416 | 0.19135 | 1.0000 |
| O  | O111 | 1.0 | 0.15782 | 0.16020 | 0.19083 | 1.0000 |
| O  | O112 | 1.0 | 0.13955 | 0.35399 | 0.15554 | 1.0000 |
| O  | O113 | 1.0 | 0.49744 | 0.17223 | 0.18893 | 1.0000 |
| O  | O114 | 1.0 | 0.50194 | 0.35924 | 0.14536 | 1.0000 |
| O  | O115 | 1.0 | 0.32997 | 0.03949 | 0.18980 | 1.0000 |
| O  | O116 | 1.0 | 0.15046 | 0.97385 | 0.14699 | 1.0000 |
| O  | O117 | 1.0 | 0.51261 | 0.98696 | 0.14539 | 1.0000 |
| O  | O118 | 1.0 | 0.01634 | 0.81896 | 0.99154 | 1.0000 |
| O  | O119 | 1.0 | 0.99828 | 0.48613 | 0.99566 | 1.0000 |
| O  | O120 | 1.0 | 0.98424 | 0.17927 | 0.49363 | 1.0000 |
| O  | O121 | 1.0 | 0.98970 | 0.51878 | 0.50373 | 1.0000 |
| O  | O122 | 1.0 | 0.16140 | 0.98363 | 0.24712 | 1.0000 |
| O  | O123 | 1.0 | 0.50075 | 0.00065 | 0.24615 | 1.0000 |
| O  | O124 | 1.0 | 0.83038 | 0.01012 | 0.75600 | 1.0000 |
| O  | O125 | 1.0 | 0.48803 | 0.01258 | 0.74984 | 1.0000 |
| O  | O126 | 1.0 | 0.85497 | 0.46532 | 0.68684 | 1.0000 |
| O  | O127 | 1.0 | 0.46752 | 0.84223 | 0.06099 | 1.0000 |
| O  | O128 | 1.0 | 0.15897 | 0.82587 | 0.32486 | 1.0000 |
| Al | Al1  | 1.0 | 0.46221 | 0.13152 | 0.62504 | 1.0000 |
| Al | Al2  | 1.0 | 0.86561 | 0.53775 | 0.62354 | 1.0000 |
| Al | Al3  | 1.0 | 0.53707 | 0.86176 | 0.12477 | 1.0000 |
| Al | Al4  | 1.0 | 0.20570 | 0.96541 | 0.30781 | 1.0000 |
| Si | Si1  | 1.0 | 0.33952 | 0.54283 | 0.06095 | 1.0000 |
| Si | Si2  | 1.0 | 0.72721 | 0.78641 | 0.05937 | 1.0000 |
| Si | Si3  | 1.0 | 0.72365 | 0.52903 | 0.05792 | 1.0000 |
| Si | Si4  | 1.0 | 0.97327 | 0.78424 | 0.04764 | 1.0000 |
| Si | Si5  | 1.0 | 0.96568 | 0.52751 | 0.05144 | 1.0000 |
| Si | Si6  | 1.0 | 0.64982 | 0.20986 | 0.54903 | 1.0000 |
| Si | Si7  | 1.0 | 0.66066 | 0.46201 | 0.55802 | 1.0000 |
| Si | Si8  | 1.0 | 0.27425 | 0.20322 | 0.56200 | 1.0000 |

|    |      |     |         |         |         |        |
|----|------|-----|---------|---------|---------|--------|
| Si | Si9  | 1.0 | 0.29053 | 0.45691 | 0.55722 | 1.0000 |
| Si | Si10 | 1.0 | 0.02991 | 0.21302 | 0.54886 | 1.0000 |
| Si | Si11 | 1.0 | 0.04649 | 0.47029 | 0.55446 | 1.0000 |
| Si | Si12 | 1.0 | 0.21000 | 0.33759 | 0.31040 | 1.0000 |
| Si | Si13 | 1.0 | 0.45855 | 0.35180 | 0.30512 | 1.0000 |
| Si | Si14 | 1.0 | 0.46799 | 0.72563 | 0.30363 | 1.0000 |
| Si | Si15 | 1.0 | 0.46781 | 0.96416 | 0.30330 | 1.0000 |
| Si | Si16 | 1.0 | 0.14364 | 0.51881 | 0.38050 | 1.0000 |
| Si | Si17 | 1.0 | 0.79975 | 0.65156 | 0.80094 | 1.0000 |
| Si | Si18 | 1.0 | 0.54918 | 0.65336 | 0.80842 | 1.0000 |
| Si | Si19 | 1.0 | 0.78269 | 0.28180 | 0.81214 | 1.0000 |
| Si | Si20 | 1.0 | 0.52589 | 0.28158 | 0.80409 | 1.0000 |
| Si | Si21 | 1.0 | 0.78425 | 0.04143 | 0.81143 | 1.0000 |
| Si | Si22 | 1.0 | 0.52611 | 0.04344 | 0.80628 | 1.0000 |
| Si | Si23 | 1.0 | 0.86112 | 0.47578 | 0.87378 | 1.0000 |
| Si | Si24 | 1.0 | 0.65794 | 0.78615 | 0.94758 | 1.0000 |
| Si | Si25 | 1.0 | 0.66797 | 0.53549 | 0.94463 | 1.0000 |
| Si | Si26 | 1.0 | 0.29010 | 0.77403 | 0.93410 | 1.0000 |
| Si | Si27 | 1.0 | 0.28650 | 0.51937 | 0.94824 | 1.0000 |
| Si | Si28 | 1.0 | 0.04808 | 0.77744 | 0.93551 | 1.0000 |
| Si | Si29 | 1.0 | 0.04589 | 0.52045 | 0.94088 | 1.0000 |
| Si | Si30 | 1.0 | 0.48517 | 0.84971 | 0.87211 | 1.0000 |
| Si | Si31 | 1.0 | 0.33699 | 0.19441 | 0.44861 | 1.0000 |
| Si | Si32 | 1.0 | 0.34036 | 0.44839 | 0.44504 | 1.0000 |
| Si | Si33 | 1.0 | 0.71296 | 0.22822 | 0.43624 | 1.0000 |
| Si | Si34 | 1.0 | 0.71169 | 0.48379 | 0.44503 | 1.0000 |
| Si | Si35 | 1.0 | 0.95502 | 0.22944 | 0.43852 | 1.0000 |
| Si | Si36 | 1.0 | 0.95403 | 0.48530 | 0.44732 | 1.0000 |
| Si | Si37 | 1.0 | 0.51874 | 0.14928 | 0.37298 | 1.0000 |
| Si | Si38 | 1.0 | 0.54043 | 0.33566 | 0.69133 | 1.0000 |
| Si | Si39 | 1.0 | 0.79261 | 0.72469 | 0.68928 | 1.0000 |
| Si | Si40 | 1.0 | 0.53465 | 0.71176 | 0.69795 | 1.0000 |
| Si | Si41 | 1.0 | 0.79008 | 0.96720 | 0.70104 | 1.0000 |
| Si | Si42 | 1.0 | 0.53153 | 0.95420 | 0.69879 | 1.0000 |

|    |      |     |         |         |         |        |
|----|------|-----|---------|---------|---------|--------|
| Si | Si43 | 1.0 | 0.20422 | 0.66043 | 0.19489 | 1.0000 |
| Si | Si44 | 1.0 | 0.45706 | 0.66036 | 0.19319 | 1.0000 |
| Si | Si45 | 1.0 | 0.19743 | 0.28179 | 0.19810 | 1.0000 |
| Si | Si46 | 1.0 | 0.45469 | 0.29173 | 0.19318 | 1.0000 |
| Si | Si47 | 1.0 | 0.20077 | 0.03835 | 0.19512 | 1.0000 |
| Si | Si48 | 1.0 | 0.45983 | 0.04763 | 0.19196 | 1.0000 |
| Si | Si49 | 1.0 | 0.14253 | 0.47154 | 0.13081 | 1.0000 |
| Si | Si50 | 1.0 | 0.16041 | 0.86000 | 0.12025 | 1.0000 |
| Si | Si51 | 1.0 | 0.53395 | 0.47691 | 0.12508 | 1.0000 |
| Si | Si52 | 1.0 | 0.84154 | 0.15777 | 0.62456 | 1.0000 |
| Si | Si53 | 1.0 | 0.46987 | 0.53276 | 0.62695 | 1.0000 |
| Si | Si54 | 1.0 | 0.14944 | 0.14199 | 0.37973 | 1.0000 |
| Si | Si55 | 1.0 | 0.52883 | 0.53546 | 0.37382 | 1.0000 |
| Si | Si56 | 1.0 | 0.85066 | 0.84352 | 0.87381 | 1.0000 |
| Si | Si57 | 1.0 | 0.47656 | 0.46520 | 0.87848 | 1.0000 |
| Si | Si58 | 1.0 | 0.79581 | 0.34634 | 0.70071 | 1.0000 |
| Si | Si59 | 1.0 | 0.34281 | 0.79851 | 0.04639 | 1.0000 |
| Si | Si60 | 1.0 | 0.21248 | 0.70855 | 0.30702 | 1.0000 |



T2T7T7T9:

data\_image0

\_chemical\_formula\_structural H4O128Al4Si60  
\_chemical\_formula\_sum "H4 O128 Al4 Si60"  
\_cell\_length\_a 12.5214  
\_cell\_length\_b 12.576  
\_cell\_length\_c 26.4428  
\_cell\_angle\_alpha 89.4627  
\_cell\_angle\_beta 89.7907  
\_cell\_angle\_gamma 90.8127

\_space\_group\_name\_H-M\_alt "P 1"  
\_space\_group\_IT\_number 1

loop\_

\_space\_group\_symop\_operation\_xyz  
'x, y, z'

loop\_

\_atom\_site\_type\_symbol  
\_atom\_site\_label  
\_atom\_site\_symmetry\_multiplicity  
\_atom\_site\_fract\_x  
\_atom\_site\_fract\_y  
\_atom\_site\_fract\_z  
\_atom\_site\_occupancy  
H H1 1.0 0.47743 0.14777 0.53446 1.0000  
H H2 1.0 0.85694 0.51818 0.71456 1.0000  
H H3 1.0 0.52152 0.84307 0.03330 1.0000  
H H4 1.0 0.10696 0.82440 0.35239 1.0000  
O O1 1.0 0.32897 0.67252 0.05766 1.0000  
O O2 1.0 0.33378 0.82652 0.98670 1.0000  
O O3 1.0 0.26100 0.86522 0.08003 1.0000  
O O4 1.0 0.31658 0.49100 0.00627 1.0000

|   |     |     |         |         |         |        |
|---|-----|-----|---------|---------|---------|--------|
| O | O5  | 1.0 | 0.25456 | 0.49377 | 0.10100 | 1.0000 |
| O | O6  | 1.0 | 0.45951 | 0.51376 | 0.07758 | 1.0000 |
| O | O7  | 1.0 | 0.72165 | 0.65739 | 0.06197 | 1.0000 |
| O | O8  | 1.0 | 0.85152 | 0.82526 | 0.05431 | 1.0000 |
| O | O9  | 1.0 | 0.66702 | 0.83939 | 0.10566 | 1.0000 |
| O | O10 | 1.0 | 0.84494 | 0.48795 | 0.06379 | 1.0000 |
| O | O11 | 1.0 | 0.65518 | 0.47378 | 0.10320 | 1.0000 |
| O | O12 | 1.0 | 0.97749 | 0.65595 | 0.05341 | 1.0000 |
| O | O13 | 1.0 | 0.05005 | 0.83634 | 0.09010 | 1.0000 |
| O | O14 | 1.0 | 0.04306 | 0.47484 | 0.09258 | 1.0000 |
| O | O15 | 1.0 | 0.62768 | 0.33495 | 0.55426 | 1.0000 |
| O | O16 | 1.0 | 0.67814 | 0.17839 | 0.49150 | 1.0000 |
| O | O17 | 1.0 | 0.73567 | 0.16360 | 0.58856 | 1.0000 |
| O | O18 | 1.0 | 0.53305 | 0.14445 | 0.56154 | 1.0000 |
| O | O19 | 1.0 | 0.66929 | 0.51237 | 0.50116 | 1.0000 |
| O | O20 | 1.0 | 0.77045 | 0.47192 | 0.58846 | 1.0000 |
| O | O21 | 1.0 | 0.56328 | 0.52357 | 0.58480 | 1.0000 |
| O | O22 | 1.0 | 0.28240 | 0.33091 | 0.57036 | 1.0000 |
| O | O23 | 1.0 | 0.15001 | 0.16659 | 0.55487 | 1.0000 |
| O | O24 | 1.0 | 0.33048 | 0.14266 | 0.60763 | 1.0000 |
| O | O25 | 1.0 | 0.17217 | 0.50423 | 0.55132 | 1.0000 |
| O | O26 | 1.0 | 0.35307 | 0.52028 | 0.60130 | 1.0000 |
| O | O27 | 1.0 | 0.03259 | 0.34081 | 0.55408 | 1.0000 |
| O | O28 | 1.0 | 0.95058 | 0.15992 | 0.59152 | 1.0000 |
| O | O29 | 1.0 | 0.99404 | 0.51787 | 0.60424 | 1.0000 |
| O | O30 | 1.0 | 0.33257 | 0.38442 | 0.30958 | 1.0000 |
| O | O31 | 1.0 | 0.16360 | 0.32657 | 0.25357 | 1.0000 |
| O | O32 | 1.0 | 0.20677 | 0.22210 | 0.33816 | 1.0000 |
| O | O33 | 1.0 | 0.13609 | 0.42188 | 0.34057 | 1.0000 |
| O | O34 | 1.0 | 0.49425 | 0.34439 | 0.24628 | 1.0000 |
| O | O35 | 1.0 | 0.47410 | 0.23874 | 0.33401 | 1.0000 |
| O | O36 | 1.0 | 0.53181 | 0.44417 | 0.33069 | 1.0000 |
| O | O37 | 1.0 | 0.33762 | 0.73062 | 0.30367 | 1.0000 |
| O | O38 | 1.0 | 0.18067 | 0.62776 | 0.35158 | 1.0000 |

|   |     |     |         |         |         |        |
|---|-----|-----|---------|---------|---------|--------|
| O | O39 | 1.0 | 0.51434 | 0.84421 | 0.31191 | 1.0000 |
| O | O40 | 1.0 | 0.50679 | 0.65128 | 0.34975 | 1.0000 |
| O | O41 | 1.0 | 0.34173 | 0.96925 | 0.31338 | 1.0000 |
| O | O42 | 1.0 | 0.13809 | 0.02538 | 0.35660 | 1.0000 |
| O | O43 | 1.0 | 0.53061 | 0.03753 | 0.34453 | 1.0000 |
| O | O44 | 1.0 | 0.67463 | 0.61961 | 0.81019 | 1.0000 |
| O | O45 | 1.0 | 0.83030 | 0.65588 | 0.74072 | 1.0000 |
| O | O46 | 1.0 | 0.82687 | 0.76565 | 0.82615 | 1.0000 |
| O | O47 | 1.0 | 0.86977 | 0.55573 | 0.82480 | 1.0000 |
| O | O48 | 1.0 | 0.50743 | 0.64743 | 0.75070 | 1.0000 |
| O | O49 | 1.0 | 0.53966 | 0.77390 | 0.82989 | 1.0000 |
| O | O50 | 1.0 | 0.47935 | 0.57255 | 0.84361 | 1.0000 |
| O | O51 | 1.0 | 0.65488 | 0.28738 | 0.80774 | 1.0000 |
| O | O52 | 1.0 | 0.82197 | 0.16231 | 0.82478 | 1.0000 |
| O | O53 | 1.0 | 0.82034 | 0.35898 | 0.85723 | 1.0000 |
| O | O54 | 1.0 | 0.48586 | 0.16226 | 0.81857 | 1.0000 |
| O | O55 | 1.0 | 0.47329 | 0.36049 | 0.84428 | 1.0000 |
| O | O56 | 1.0 | 0.65502 | 0.03292 | 0.81172 | 1.0000 |
| O | O57 | 1.0 | 0.83219 | 0.96481 | 0.85532 | 1.0000 |
| O | O58 | 1.0 | 0.47105 | 0.96763 | 0.84915 | 1.0000 |
| O | O59 | 1.0 | 0.63038 | 0.65957 | 0.94276 | 1.0000 |
| O | O60 | 1.0 | 0.65996 | 0.82082 | 0.00713 | 1.0000 |
| O | O61 | 1.0 | 0.77232 | 0.81285 | 0.92126 | 1.0000 |
| O | O62 | 1.0 | 0.56162 | 0.85310 | 0.92217 | 1.0000 |
| O | O63 | 1.0 | 0.67669 | 0.49456 | 0.00271 | 1.0000 |
| O | O64 | 1.0 | 0.78341 | 0.52708 | 0.91640 | 1.0000 |
| O | O65 | 1.0 | 0.58005 | 0.46303 | 0.91559 | 1.0000 |
| O | O66 | 1.0 | 0.29351 | 0.64676 | 0.94043 | 1.0000 |
| O | O67 | 1.0 | 0.17028 | 0.81441 | 0.92270 | 1.0000 |
| O | O68 | 1.0 | 0.36665 | 0.80781 | 0.88744 | 1.0000 |
| O | O69 | 1.0 | 0.16686 | 0.47853 | 0.93551 | 1.0000 |
| O | O70 | 1.0 | 0.36765 | 0.46058 | 0.91103 | 1.0000 |
| O | O71 | 1.0 | 0.03773 | 0.64868 | 0.93326 | 1.0000 |
| O | O72 | 1.0 | 0.97268 | 0.83077 | 0.89279 | 1.0000 |

|   |      |     |         |         |         |        |
|---|------|-----|---------|---------|---------|--------|
| O | O73  | 1.0 | 0.97936 | 0.46157 | 0.89671 | 1.0000 |
| O | O74  | 1.0 | 0.34224 | 0.32096 | 0.43537 | 1.0000 |
| O | O75  | 1.0 | 0.34637 | 0.17531 | 0.51009 | 1.0000 |
| O | O76  | 1.0 | 0.22437 | 0.14303 | 0.43061 | 1.0000 |
| O | O77  | 1.0 | 0.43895 | 0.13829 | 0.42227 | 1.0000 |
| O | O78  | 1.0 | 0.35662 | 0.47366 | 0.50439 | 1.0000 |
| O | O79  | 1.0 | 0.22595 | 0.49278 | 0.42596 | 1.0000 |
| O | O80  | 1.0 | 0.43591 | 0.50678 | 0.41457 | 1.0000 |
| O | O81  | 1.0 | 0.70224 | 0.35600 | 0.43774 | 1.0000 |
| O | O82  | 1.0 | 0.83406 | 0.19374 | 0.42378 | 1.0000 |
| O | O83  | 1.0 | 0.63681 | 0.18179 | 0.39275 | 1.0000 |
| O | O84  | 1.0 | 0.83370 | 0.52464 | 0.43711 | 1.0000 |
| O | O85  | 1.0 | 0.64262 | 0.54380 | 0.40224 | 1.0000 |
| O | O86  | 1.0 | 0.96486 | 0.35790 | 0.44061 | 1.0000 |
| O | O87  | 1.0 | 0.03270 | 0.18633 | 0.39486 | 1.0000 |
| O | O88  | 1.0 | 0.02802 | 0.54430 | 0.40448 | 1.0000 |
| O | O89  | 1.0 | 0.66921 | 0.36239 | 0.69665 | 1.0000 |
| O | O90  | 1.0 | 0.83415 | 0.32180 | 0.75805 | 1.0000 |
| O | O91  | 1.0 | 0.84252 | 0.26187 | 0.66136 | 1.0000 |
| O | O92  | 1.0 | 0.49044 | 0.31493 | 0.74754 | 1.0000 |
| O | O93  | 1.0 | 0.52442 | 0.23440 | 0.65625 | 1.0000 |
| O | O94  | 1.0 | 0.48372 | 0.44202 | 0.67028 | 1.0000 |
| O | O95  | 1.0 | 0.66300 | 0.71788 | 0.68948 | 1.0000 |
| O | O96  | 1.0 | 0.83503 | 0.84762 | 0.69285 | 1.0000 |
| O | O97  | 1.0 | 0.84171 | 0.66644 | 0.64155 | 1.0000 |
| O | O98  | 1.0 | 0.49012 | 0.83104 | 0.70203 | 1.0000 |
| O | O99  | 1.0 | 0.47628 | 0.64987 | 0.65218 | 1.0000 |
| O | O100 | 1.0 | 0.66162 | 0.96240 | 0.69989 | 1.0000 |
| O | O101 | 1.0 | 0.83616 | 0.04857 | 0.65758 | 1.0000 |
| O | O102 | 1.0 | 0.48813 | 0.00798 | 0.64842 | 1.0000 |
| O | O103 | 1.0 | 0.32927 | 0.62766 | 0.19613 | 1.0000 |
| O | O104 | 1.0 | 0.16220 | 0.68032 | 0.25277 | 1.0000 |
| O | O105 | 1.0 | 0.18490 | 0.76658 | 0.16125 | 1.0000 |
| O | O106 | 1.0 | 0.13130 | 0.56292 | 0.17371 | 1.0000 |

|    |      |     |         |         |         |        |
|----|------|-----|---------|---------|---------|--------|
| O  | O107 | 1.0 | 0.50402 | 0.67555 | 0.25016 | 1.0000 |
| O  | O108 | 1.0 | 0.47064 | 0.76524 | 0.15926 | 1.0000 |
| O  | O109 | 1.0 | 0.52333 | 0.56100 | 0.17063 | 1.0000 |
| O  | O110 | 1.0 | 0.32546 | 0.29416 | 0.19135 | 1.0000 |
| O  | O111 | 1.0 | 0.15782 | 0.16020 | 0.19083 | 1.0000 |
| O  | O112 | 1.0 | 0.13955 | 0.35399 | 0.15554 | 1.0000 |
| O  | O113 | 1.0 | 0.49744 | 0.17223 | 0.18893 | 1.0000 |
| O  | O114 | 1.0 | 0.50194 | 0.35924 | 0.14536 | 1.0000 |
| O  | O115 | 1.0 | 0.32997 | 0.03949 | 0.18980 | 1.0000 |
| O  | O116 | 1.0 | 0.15046 | 0.97385 | 0.14699 | 1.0000 |
| O  | O117 | 1.0 | 0.51261 | 0.98696 | 0.14539 | 1.0000 |
| O  | O118 | 1.0 | 0.01634 | 0.81896 | 0.99154 | 1.0000 |
| O  | O119 | 1.0 | 0.99828 | 0.48613 | 0.99566 | 1.0000 |
| O  | O120 | 1.0 | 0.98424 | 0.17927 | 0.49363 | 1.0000 |
| O  | O121 | 1.0 | 0.98970 | 0.51878 | 0.50373 | 1.0000 |
| O  | O122 | 1.0 | 0.16140 | 0.98363 | 0.24712 | 1.0000 |
| O  | O123 | 1.0 | 0.50075 | 0.00065 | 0.24615 | 1.0000 |
| O  | O124 | 1.0 | 0.83038 | 0.01012 | 0.75600 | 1.0000 |
| O  | O125 | 1.0 | 0.48803 | 0.01258 | 0.74984 | 1.0000 |
| O  | O126 | 1.0 | 0.85497 | 0.46532 | 0.68684 | 1.0000 |
| O  | O127 | 1.0 | 0.46752 | 0.84223 | 0.06099 | 1.0000 |
| O  | O128 | 1.0 | 0.15897 | 0.82587 | 0.32486 | 1.0000 |
| Al | Al1  | 1.0 | 0.46221 | 0.13152 | 0.62504 | 1.0000 |
| Al | Al2  | 1.0 | 0.86561 | 0.53775 | 0.62354 | 1.0000 |
| Al | Al3  | 1.0 | 0.53707 | 0.86176 | 0.12477 | 1.0000 |
| Al | Al4  | 1.0 | 0.20570 | 0.96541 | 0.30781 | 1.0000 |
| Si | Si1  | 1.0 | 0.33952 | 0.54283 | 0.06095 | 1.0000 |
| Si | Si2  | 1.0 | 0.72721 | 0.78641 | 0.05937 | 1.0000 |
| Si | Si3  | 1.0 | 0.72365 | 0.52903 | 0.05792 | 1.0000 |
| Si | Si4  | 1.0 | 0.97327 | 0.78424 | 0.04764 | 1.0000 |
| Si | Si5  | 1.0 | 0.96568 | 0.52751 | 0.05144 | 1.0000 |
| Si | Si6  | 1.0 | 0.64982 | 0.20986 | 0.54903 | 1.0000 |
| Si | Si7  | 1.0 | 0.66066 | 0.46201 | 0.55802 | 1.0000 |
| Si | Si8  | 1.0 | 0.27425 | 0.20322 | 0.56200 | 1.0000 |

|    |      |     |         |         |         |        |
|----|------|-----|---------|---------|---------|--------|
| Si | Si9  | 1.0 | 0.29053 | 0.45691 | 0.55722 | 1.0000 |
| Si | Si10 | 1.0 | 0.02991 | 0.21302 | 0.54886 | 1.0000 |
| Si | Si11 | 1.0 | 0.04649 | 0.47029 | 0.55446 | 1.0000 |
| Si | Si12 | 1.0 | 0.21000 | 0.33759 | 0.31040 | 1.0000 |
| Si | Si13 | 1.0 | 0.45855 | 0.35180 | 0.30512 | 1.0000 |
| Si | Si14 | 1.0 | 0.46799 | 0.72563 | 0.30363 | 1.0000 |
| Si | Si15 | 1.0 | 0.46781 | 0.96416 | 0.30330 | 1.0000 |
| Si | Si16 | 1.0 | 0.14364 | 0.51881 | 0.38050 | 1.0000 |
| Si | Si17 | 1.0 | 0.79975 | 0.65156 | 0.80094 | 1.0000 |
| Si | Si18 | 1.0 | 0.54918 | 0.65336 | 0.80842 | 1.0000 |
| Si | Si19 | 1.0 | 0.78269 | 0.28180 | 0.81214 | 1.0000 |
| Si | Si20 | 1.0 | 0.52589 | 0.28158 | 0.80409 | 1.0000 |
| Si | Si21 | 1.0 | 0.78425 | 0.04143 | 0.81143 | 1.0000 |
| Si | Si22 | 1.0 | 0.52611 | 0.04344 | 0.80628 | 1.0000 |
| Si | Si23 | 1.0 | 0.86112 | 0.47578 | 0.87378 | 1.0000 |
| Si | Si24 | 1.0 | 0.65794 | 0.78615 | 0.94758 | 1.0000 |
| Si | Si25 | 1.0 | 0.66797 | 0.53549 | 0.94463 | 1.0000 |
| Si | Si26 | 1.0 | 0.29010 | 0.77403 | 0.93410 | 1.0000 |
| Si | Si27 | 1.0 | 0.28650 | 0.51937 | 0.94824 | 1.0000 |
| Si | Si28 | 1.0 | 0.04808 | 0.77744 | 0.93551 | 1.0000 |
| Si | Si29 | 1.0 | 0.04589 | 0.52045 | 0.94088 | 1.0000 |
| Si | Si30 | 1.0 | 0.48517 | 0.84971 | 0.87211 | 1.0000 |
| Si | Si31 | 1.0 | 0.33699 | 0.19441 | 0.44861 | 1.0000 |
| Si | Si32 | 1.0 | 0.34036 | 0.44839 | 0.44504 | 1.0000 |
| Si | Si33 | 1.0 | 0.71296 | 0.22822 | 0.43624 | 1.0000 |
| Si | Si34 | 1.0 | 0.71169 | 0.48379 | 0.44503 | 1.0000 |
| Si | Si35 | 1.0 | 0.95502 | 0.22944 | 0.43852 | 1.0000 |
| Si | Si36 | 1.0 | 0.95403 | 0.48530 | 0.44732 | 1.0000 |
| Si | Si37 | 1.0 | 0.51874 | 0.14928 | 0.37298 | 1.0000 |
| Si | Si38 | 1.0 | 0.54043 | 0.33566 | 0.69133 | 1.0000 |
| Si | Si39 | 1.0 | 0.79261 | 0.72469 | 0.68928 | 1.0000 |
| Si | Si40 | 1.0 | 0.53465 | 0.71176 | 0.69795 | 1.0000 |
| Si | Si41 | 1.0 | 0.79008 | 0.96720 | 0.70104 | 1.0000 |
| Si | Si42 | 1.0 | 0.53153 | 0.95420 | 0.69879 | 1.0000 |

|    |      |     |         |         |         |        |
|----|------|-----|---------|---------|---------|--------|
| Si | Si43 | 1.0 | 0.20422 | 0.66043 | 0.19489 | 1.0000 |
| Si | Si44 | 1.0 | 0.45706 | 0.66036 | 0.19319 | 1.0000 |
| Si | Si45 | 1.0 | 0.19743 | 0.28179 | 0.19810 | 1.0000 |
| Si | Si46 | 1.0 | 0.45469 | 0.29173 | 0.19318 | 1.0000 |
| Si | Si47 | 1.0 | 0.20077 | 0.03835 | 0.19512 | 1.0000 |
| Si | Si48 | 1.0 | 0.45983 | 0.04763 | 0.19196 | 1.0000 |
| Si | Si49 | 1.0 | 0.14253 | 0.47154 | 0.13081 | 1.0000 |
| Si | Si50 | 1.0 | 0.16041 | 0.86000 | 0.12025 | 1.0000 |
| Si | Si51 | 1.0 | 0.53395 | 0.47691 | 0.12508 | 1.0000 |
| Si | Si52 | 1.0 | 0.84154 | 0.15777 | 0.62456 | 1.0000 |
| Si | Si53 | 1.0 | 0.46987 | 0.53276 | 0.62695 | 1.0000 |
| Si | Si54 | 1.0 | 0.14944 | 0.14199 | 0.37973 | 1.0000 |
| Si | Si55 | 1.0 | 0.52883 | 0.53546 | 0.37382 | 1.0000 |
| Si | Si56 | 1.0 | 0.85066 | 0.84352 | 0.87381 | 1.0000 |
| Si | Si57 | 1.0 | 0.47656 | 0.46520 | 0.87848 | 1.0000 |
| Si | Si58 | 1.0 | 0.79581 | 0.34634 | 0.70071 | 1.0000 |
| Si | Si59 | 1.0 | 0.34281 | 0.79851 | 0.04639 | 1.0000 |
| Si | Si60 | 1.0 | 0.21248 | 0.70855 | 0.30702 | 1.0000 |

T7T7T7T7:

data\_image0

\_chemical\_formula\_structural H4O128Al4Si60  
\_chemical\_formula\_sum "H4 O128 Al4 Si60"  
\_cell\_length\_a 12.5214  
\_cell\_length\_b 12.576  
\_cell\_length\_c 26.4428  
\_cell\_angle\_alpha 89.4627  
\_cell\_angle\_beta 89.7907  
\_cell\_angle\_gamma 90.8127

\_space\_group\_name\_H-M\_alt "P 1"

\_space\_group\_IT\_number 1

loop\_

\_space\_group\_symop\_operation\_xyz

'x, y, z'

loop\_

\_atom\_site\_type\_symbol

\_atom\_site\_label

\_atom\_site\_symmetry\_multiplicity

\_atom\_site\_fract\_x

\_atom\_site\_fract\_y

\_atom\_site\_fract\_z

\_atom\_site\_occupancy

|   |    |     |         |         |         |        |
|---|----|-----|---------|---------|---------|--------|
| H | H1 | 1.0 | 0.47743 | 0.14777 | 0.53446 | 1.0000 |
| H | H2 | 1.0 | 0.85694 | 0.51818 | 0.71456 | 1.0000 |
| H | H3 | 1.0 | 0.52152 | 0.84307 | 0.03330 | 1.0000 |
| H | H4 | 1.0 | 0.10696 | 0.82440 | 0.35239 | 1.0000 |
| O | O1 | 1.0 | 0.32897 | 0.67252 | 0.05766 | 1.0000 |
| O | O2 | 1.0 | 0.33378 | 0.82652 | 0.98670 | 1.0000 |
| O | O3 | 1.0 | 0.26100 | 0.86522 | 0.08003 | 1.0000 |
| O | O4 | 1.0 | 0.31658 | 0.49100 | 0.00627 | 1.0000 |



|   |     |     |         |         |         |        |
|---|-----|-----|---------|---------|---------|--------|
| O | O5  | 1.0 | 0.25456 | 0.49377 | 0.10100 | 1.0000 |
| O | O6  | 1.0 | 0.45951 | 0.51376 | 0.07758 | 1.0000 |
| O | O7  | 1.0 | 0.72165 | 0.65739 | 0.06197 | 1.0000 |
| O | O8  | 1.0 | 0.85152 | 0.82526 | 0.05431 | 1.0000 |
| O | O9  | 1.0 | 0.66702 | 0.83939 | 0.10566 | 1.0000 |
| O | O10 | 1.0 | 0.84494 | 0.48795 | 0.06379 | 1.0000 |
| O | O11 | 1.0 | 0.65518 | 0.47378 | 0.10320 | 1.0000 |
| O | O12 | 1.0 | 0.97749 | 0.65595 | 0.05341 | 1.0000 |
| O | O13 | 1.0 | 0.05005 | 0.83634 | 0.09010 | 1.0000 |
| O | O14 | 1.0 | 0.04306 | 0.47484 | 0.09258 | 1.0000 |
| O | O15 | 1.0 | 0.62768 | 0.33495 | 0.55426 | 1.0000 |
| O | O16 | 1.0 | 0.67814 | 0.17839 | 0.49150 | 1.0000 |
| O | O17 | 1.0 | 0.73567 | 0.16360 | 0.58856 | 1.0000 |
| O | O18 | 1.0 | 0.53305 | 0.14445 | 0.56154 | 1.0000 |
| O | O19 | 1.0 | 0.66929 | 0.51237 | 0.50116 | 1.0000 |
| O | O20 | 1.0 | 0.77045 | 0.47192 | 0.58846 | 1.0000 |
| O | O21 | 1.0 | 0.56328 | 0.52357 | 0.58480 | 1.0000 |
| O | O22 | 1.0 | 0.28240 | 0.33091 | 0.57036 | 1.0000 |
| O | O23 | 1.0 | 0.15001 | 0.16659 | 0.55487 | 1.0000 |
| O | O24 | 1.0 | 0.33048 | 0.14266 | 0.60763 | 1.0000 |
| O | O25 | 1.0 | 0.17217 | 0.50423 | 0.55132 | 1.0000 |
| O | O26 | 1.0 | 0.35307 | 0.52028 | 0.60130 | 1.0000 |
| O | O27 | 1.0 | 0.03259 | 0.34081 | 0.55408 | 1.0000 |
| O | O28 | 1.0 | 0.95058 | 0.15992 | 0.59152 | 1.0000 |
| O | O29 | 1.0 | 0.99404 | 0.51787 | 0.60424 | 1.0000 |
| O | O30 | 1.0 | 0.33257 | 0.38442 | 0.30958 | 1.0000 |
| O | O31 | 1.0 | 0.16360 | 0.32657 | 0.25357 | 1.0000 |
| O | O32 | 1.0 | 0.20677 | 0.22210 | 0.33816 | 1.0000 |
| O | O33 | 1.0 | 0.13609 | 0.42188 | 0.34057 | 1.0000 |
| O | O34 | 1.0 | 0.49425 | 0.34439 | 0.24628 | 1.0000 |
| O | O35 | 1.0 | 0.47410 | 0.23874 | 0.33401 | 1.0000 |
| O | O36 | 1.0 | 0.53181 | 0.44417 | 0.33069 | 1.0000 |
| O | O37 | 1.0 | 0.33762 | 0.73062 | 0.30367 | 1.0000 |
| O | O38 | 1.0 | 0.18067 | 0.62776 | 0.35158 | 1.0000 |

|   |     |     |         |         |         |        |
|---|-----|-----|---------|---------|---------|--------|
| O | O39 | 1.0 | 0.51434 | 0.84421 | 0.31191 | 1.0000 |
| O | O40 | 1.0 | 0.50679 | 0.65128 | 0.34975 | 1.0000 |
| O | O41 | 1.0 | 0.34173 | 0.96925 | 0.31338 | 1.0000 |
| O | O42 | 1.0 | 0.13809 | 0.02538 | 0.35660 | 1.0000 |
| O | O43 | 1.0 | 0.53061 | 0.03753 | 0.34453 | 1.0000 |
| O | O44 | 1.0 | 0.67463 | 0.61961 | 0.81019 | 1.0000 |
| O | O45 | 1.0 | 0.83030 | 0.65588 | 0.74072 | 1.0000 |
| O | O46 | 1.0 | 0.82687 | 0.76565 | 0.82615 | 1.0000 |
| O | O47 | 1.0 | 0.86977 | 0.55573 | 0.82480 | 1.0000 |
| O | O48 | 1.0 | 0.50743 | 0.64743 | 0.75070 | 1.0000 |
| O | O49 | 1.0 | 0.53966 | 0.77390 | 0.82989 | 1.0000 |
| O | O50 | 1.0 | 0.47935 | 0.57255 | 0.84361 | 1.0000 |
| O | O51 | 1.0 | 0.65488 | 0.28738 | 0.80774 | 1.0000 |
| O | O52 | 1.0 | 0.82197 | 0.16231 | 0.82478 | 1.0000 |
| O | O53 | 1.0 | 0.82034 | 0.35898 | 0.85723 | 1.0000 |
| O | O54 | 1.0 | 0.48586 | 0.16226 | 0.81857 | 1.0000 |
| O | O55 | 1.0 | 0.47329 | 0.36049 | 0.84428 | 1.0000 |
| O | O56 | 1.0 | 0.65502 | 0.03292 | 0.81172 | 1.0000 |
| O | O57 | 1.0 | 0.83219 | 0.96481 | 0.85532 | 1.0000 |
| O | O58 | 1.0 | 0.47105 | 0.96763 | 0.84915 | 1.0000 |
| O | O59 | 1.0 | 0.63038 | 0.65957 | 0.94276 | 1.0000 |
| O | O60 | 1.0 | 0.65996 | 0.82082 | 0.00713 | 1.0000 |
| O | O61 | 1.0 | 0.77232 | 0.81285 | 0.92126 | 1.0000 |
| O | O62 | 1.0 | 0.56162 | 0.85310 | 0.92217 | 1.0000 |
| O | O63 | 1.0 | 0.67669 | 0.49456 | 0.00271 | 1.0000 |
| O | O64 | 1.0 | 0.78341 | 0.52708 | 0.91640 | 1.0000 |
| O | O65 | 1.0 | 0.58005 | 0.46303 | 0.91559 | 1.0000 |
| O | O66 | 1.0 | 0.29351 | 0.64676 | 0.94043 | 1.0000 |
| O | O67 | 1.0 | 0.17028 | 0.81441 | 0.92270 | 1.0000 |
| O | O68 | 1.0 | 0.36665 | 0.80781 | 0.88744 | 1.0000 |
| O | O69 | 1.0 | 0.16686 | 0.47853 | 0.93551 | 1.0000 |
| O | O70 | 1.0 | 0.36765 | 0.46058 | 0.91103 | 1.0000 |
| O | O71 | 1.0 | 0.03773 | 0.64868 | 0.93326 | 1.0000 |
| O | O72 | 1.0 | 0.97268 | 0.83077 | 0.89279 | 1.0000 |

|   |      |     |         |         |         |        |
|---|------|-----|---------|---------|---------|--------|
| O | O73  | 1.0 | 0.97936 | 0.46157 | 0.89671 | 1.0000 |
| O | O74  | 1.0 | 0.34224 | 0.32096 | 0.43537 | 1.0000 |
| O | O75  | 1.0 | 0.34637 | 0.17531 | 0.51009 | 1.0000 |
| O | O76  | 1.0 | 0.22437 | 0.14303 | 0.43061 | 1.0000 |
| O | O77  | 1.0 | 0.43895 | 0.13829 | 0.42227 | 1.0000 |
| O | O78  | 1.0 | 0.35662 | 0.47366 | 0.50439 | 1.0000 |
| O | O79  | 1.0 | 0.22595 | 0.49278 | 0.42596 | 1.0000 |
| O | O80  | 1.0 | 0.43591 | 0.50678 | 0.41457 | 1.0000 |
| O | O81  | 1.0 | 0.70224 | 0.35600 | 0.43774 | 1.0000 |
| O | O82  | 1.0 | 0.83406 | 0.19374 | 0.42378 | 1.0000 |
| O | O83  | 1.0 | 0.63681 | 0.18179 | 0.39275 | 1.0000 |
| O | O84  | 1.0 | 0.83370 | 0.52464 | 0.43711 | 1.0000 |
| O | O85  | 1.0 | 0.64262 | 0.54380 | 0.40224 | 1.0000 |
| O | O86  | 1.0 | 0.96486 | 0.35790 | 0.44061 | 1.0000 |
| O | O87  | 1.0 | 0.03270 | 0.18633 | 0.39486 | 1.0000 |
| O | O88  | 1.0 | 0.02802 | 0.54430 | 0.40448 | 1.0000 |
| O | O89  | 1.0 | 0.66921 | 0.36239 | 0.69665 | 1.0000 |
| O | O90  | 1.0 | 0.83415 | 0.32180 | 0.75805 | 1.0000 |
| O | O91  | 1.0 | 0.84252 | 0.26187 | 0.66136 | 1.0000 |
| O | O92  | 1.0 | 0.49044 | 0.31493 | 0.74754 | 1.0000 |
| O | O93  | 1.0 | 0.52442 | 0.23440 | 0.65625 | 1.0000 |
| O | O94  | 1.0 | 0.48372 | 0.44202 | 0.67028 | 1.0000 |
| O | O95  | 1.0 | 0.66300 | 0.71788 | 0.68948 | 1.0000 |
| O | O96  | 1.0 | 0.83503 | 0.84762 | 0.69285 | 1.0000 |
| O | O97  | 1.0 | 0.84171 | 0.66644 | 0.64155 | 1.0000 |
| O | O98  | 1.0 | 0.49012 | 0.83104 | 0.70203 | 1.0000 |
| O | O99  | 1.0 | 0.47628 | 0.64987 | 0.65218 | 1.0000 |
| O | O100 | 1.0 | 0.66162 | 0.96240 | 0.69989 | 1.0000 |
| O | O101 | 1.0 | 0.83616 | 0.04857 | 0.65758 | 1.0000 |
| O | O102 | 1.0 | 0.48813 | 0.00798 | 0.64842 | 1.0000 |
| O | O103 | 1.0 | 0.32927 | 0.62766 | 0.19613 | 1.0000 |
| O | O104 | 1.0 | 0.16220 | 0.68032 | 0.25277 | 1.0000 |
| O | O105 | 1.0 | 0.18490 | 0.76658 | 0.16125 | 1.0000 |
| O | O106 | 1.0 | 0.13130 | 0.56292 | 0.17371 | 1.0000 |

|    |      |     |         |         |         |        |
|----|------|-----|---------|---------|---------|--------|
| O  | O107 | 1.0 | 0.50402 | 0.67555 | 0.25016 | 1.0000 |
| O  | O108 | 1.0 | 0.47064 | 0.76524 | 0.15926 | 1.0000 |
| O  | O109 | 1.0 | 0.52333 | 0.56100 | 0.17063 | 1.0000 |
| O  | O110 | 1.0 | 0.32546 | 0.29416 | 0.19135 | 1.0000 |
| O  | O111 | 1.0 | 0.15782 | 0.16020 | 0.19083 | 1.0000 |
| O  | O112 | 1.0 | 0.13955 | 0.35399 | 0.15554 | 1.0000 |
| O  | O113 | 1.0 | 0.49744 | 0.17223 | 0.18893 | 1.0000 |
| O  | O114 | 1.0 | 0.50194 | 0.35924 | 0.14536 | 1.0000 |
| O  | O115 | 1.0 | 0.32997 | 0.03949 | 0.18980 | 1.0000 |
| O  | O116 | 1.0 | 0.15046 | 0.97385 | 0.14699 | 1.0000 |
| O  | O117 | 1.0 | 0.51261 | 0.98696 | 0.14539 | 1.0000 |
| O  | O118 | 1.0 | 0.01634 | 0.81896 | 0.99154 | 1.0000 |
| O  | O119 | 1.0 | 0.99828 | 0.48613 | 0.99566 | 1.0000 |
| O  | O120 | 1.0 | 0.98424 | 0.17927 | 0.49363 | 1.0000 |
| O  | O121 | 1.0 | 0.98970 | 0.51878 | 0.50373 | 1.0000 |
| O  | O122 | 1.0 | 0.16140 | 0.98363 | 0.24712 | 1.0000 |
| O  | O123 | 1.0 | 0.50075 | 0.00065 | 0.24615 | 1.0000 |
| O  | O124 | 1.0 | 0.83038 | 0.01012 | 0.75600 | 1.0000 |
| O  | O125 | 1.0 | 0.48803 | 0.01258 | 0.74984 | 1.0000 |
| O  | O126 | 1.0 | 0.85497 | 0.46532 | 0.68684 | 1.0000 |
| O  | O127 | 1.0 | 0.46752 | 0.84223 | 0.06099 | 1.0000 |
| O  | O128 | 1.0 | 0.15897 | 0.82587 | 0.32486 | 1.0000 |
| Al | Al1  | 1.0 | 0.46221 | 0.13152 | 0.62504 | 1.0000 |
| Al | Al2  | 1.0 | 0.86561 | 0.53775 | 0.62354 | 1.0000 |
| Al | Al3  | 1.0 | 0.53707 | 0.86176 | 0.12477 | 1.0000 |
| Al | Al4  | 1.0 | 0.20570 | 0.96541 | 0.30781 | 1.0000 |
| Si | Si1  | 1.0 | 0.33952 | 0.54283 | 0.06095 | 1.0000 |
| Si | Si2  | 1.0 | 0.72721 | 0.78641 | 0.05937 | 1.0000 |
| Si | Si3  | 1.0 | 0.72365 | 0.52903 | 0.05792 | 1.0000 |
| Si | Si4  | 1.0 | 0.97327 | 0.78424 | 0.04764 | 1.0000 |
| Si | Si5  | 1.0 | 0.96568 | 0.52751 | 0.05144 | 1.0000 |
| Si | Si6  | 1.0 | 0.64982 | 0.20986 | 0.54903 | 1.0000 |
| Si | Si7  | 1.0 | 0.66066 | 0.46201 | 0.55802 | 1.0000 |
| Si | Si8  | 1.0 | 0.27425 | 0.20322 | 0.56200 | 1.0000 |

|    |      |     |         |         |         |        |
|----|------|-----|---------|---------|---------|--------|
| Si | Si9  | 1.0 | 0.29053 | 0.45691 | 0.55722 | 1.0000 |
| Si | Si10 | 1.0 | 0.02991 | 0.21302 | 0.54886 | 1.0000 |
| Si | Si11 | 1.0 | 0.04649 | 0.47029 | 0.55446 | 1.0000 |
| Si | Si12 | 1.0 | 0.21000 | 0.33759 | 0.31040 | 1.0000 |
| Si | Si13 | 1.0 | 0.45855 | 0.35180 | 0.30512 | 1.0000 |
| Si | Si14 | 1.0 | 0.46799 | 0.72563 | 0.30363 | 1.0000 |
| Si | Si15 | 1.0 | 0.46781 | 0.96416 | 0.30330 | 1.0000 |
| Si | Si16 | 1.0 | 0.14364 | 0.51881 | 0.38050 | 1.0000 |
| Si | Si17 | 1.0 | 0.79975 | 0.65156 | 0.80094 | 1.0000 |
| Si | Si18 | 1.0 | 0.54918 | 0.65336 | 0.80842 | 1.0000 |
| Si | Si19 | 1.0 | 0.78269 | 0.28180 | 0.81214 | 1.0000 |
| Si | Si20 | 1.0 | 0.52589 | 0.28158 | 0.80409 | 1.0000 |
| Si | Si21 | 1.0 | 0.78425 | 0.04143 | 0.81143 | 1.0000 |
| Si | Si22 | 1.0 | 0.52611 | 0.04344 | 0.80628 | 1.0000 |
| Si | Si23 | 1.0 | 0.86112 | 0.47578 | 0.87378 | 1.0000 |
| Si | Si24 | 1.0 | 0.65794 | 0.78615 | 0.94758 | 1.0000 |
| Si | Si25 | 1.0 | 0.66797 | 0.53549 | 0.94463 | 1.0000 |
| Si | Si26 | 1.0 | 0.29010 | 0.77403 | 0.93410 | 1.0000 |
| Si | Si27 | 1.0 | 0.28650 | 0.51937 | 0.94824 | 1.0000 |
| Si | Si28 | 1.0 | 0.04808 | 0.77744 | 0.93551 | 1.0000 |
| Si | Si29 | 1.0 | 0.04589 | 0.52045 | 0.94088 | 1.0000 |
| Si | Si30 | 1.0 | 0.48517 | 0.84971 | 0.87211 | 1.0000 |
| Si | Si31 | 1.0 | 0.33699 | 0.19441 | 0.44861 | 1.0000 |
| Si | Si32 | 1.0 | 0.34036 | 0.44839 | 0.44504 | 1.0000 |
| Si | Si33 | 1.0 | 0.71296 | 0.22822 | 0.43624 | 1.0000 |
| Si | Si34 | 1.0 | 0.71169 | 0.48379 | 0.44503 | 1.0000 |
| Si | Si35 | 1.0 | 0.95502 | 0.22944 | 0.43852 | 1.0000 |
| Si | Si36 | 1.0 | 0.95403 | 0.48530 | 0.44732 | 1.0000 |
| Si | Si37 | 1.0 | 0.51874 | 0.14928 | 0.37298 | 1.0000 |
| Si | Si38 | 1.0 | 0.54043 | 0.33566 | 0.69133 | 1.0000 |
| Si | Si39 | 1.0 | 0.79261 | 0.72469 | 0.68928 | 1.0000 |
| Si | Si40 | 1.0 | 0.53465 | 0.71176 | 0.69795 | 1.0000 |
| Si | Si41 | 1.0 | 0.79008 | 0.96720 | 0.70104 | 1.0000 |
| Si | Si42 | 1.0 | 0.53153 | 0.95420 | 0.69879 | 1.0000 |

|    |      |     |         |         |         |        |
|----|------|-----|---------|---------|---------|--------|
| Si | Si43 | 1.0 | 0.20422 | 0.66043 | 0.19489 | 1.0000 |
| Si | Si44 | 1.0 | 0.45706 | 0.66036 | 0.19319 | 1.0000 |
| Si | Si45 | 1.0 | 0.19743 | 0.28179 | 0.19810 | 1.0000 |
| Si | Si46 | 1.0 | 0.45469 | 0.29173 | 0.19318 | 1.0000 |
| Si | Si47 | 1.0 | 0.20077 | 0.03835 | 0.19512 | 1.0000 |
| Si | Si48 | 1.0 | 0.45983 | 0.04763 | 0.19196 | 1.0000 |
| Si | Si49 | 1.0 | 0.14253 | 0.47154 | 0.13081 | 1.0000 |
| Si | Si50 | 1.0 | 0.16041 | 0.86000 | 0.12025 | 1.0000 |
| Si | Si51 | 1.0 | 0.53395 | 0.47691 | 0.12508 | 1.0000 |
| Si | Si52 | 1.0 | 0.84154 | 0.15777 | 0.62456 | 1.0000 |
| Si | Si53 | 1.0 | 0.46987 | 0.53276 | 0.62695 | 1.0000 |
| Si | Si54 | 1.0 | 0.14944 | 0.14199 | 0.37973 | 1.0000 |
| Si | Si55 | 1.0 | 0.52883 | 0.53546 | 0.37382 | 1.0000 |
| Si | Si56 | 1.0 | 0.85066 | 0.84352 | 0.87381 | 1.0000 |
| Si | Si57 | 1.0 | 0.47656 | 0.46520 | 0.87848 | 1.0000 |
| Si | Si58 | 1.0 | 0.79581 | 0.34634 | 0.70071 | 1.0000 |
| Si | Si59 | 1.0 | 0.34281 | 0.79851 | 0.04639 | 1.0000 |
| Si | Si60 | 1.0 | 0.21248 | 0.70855 | 0.30702 | 1.0000 |

T7T7T7T9:

data\_image0

\_chemical\_formula\_structural H4O128Al4Si60  
\_chemical\_formula\_sum "H4 O128 Al4 Si60"  
\_cell\_length\_a 12.5214  
\_cell\_length\_b 12.576  
\_cell\_length\_c 26.4428  
\_cell\_angle\_alpha 89.4627  
\_cell\_angle\_beta 89.7907  
\_cell\_angle\_gamma 90.8127

\_space\_group\_name\_H-M\_alt "P 1"  
\_space\_group\_IT\_number 1

loop\_

\_space\_group\_symop\_operation\_xyz  
'x, y, z'

loop\_

\_atom\_site\_type\_symbol  
\_atom\_site\_label  
\_atom\_site\_symmetry\_multiplicity  
\_atom\_site\_fract\_x  
\_atom\_site\_fract\_y  
\_atom\_site\_fract\_z  
\_atom\_site\_occupancy  
H H1 1.0 0.47743 0.14777 0.53446 1.0000  
H H2 1.0 0.85694 0.51818 0.71456 1.0000  
H H3 1.0 0.52152 0.84307 0.03330 1.0000  
H H4 1.0 0.10696 0.82440 0.35239 1.0000  
O O1 1.0 0.32897 0.67252 0.05766 1.0000  
O O2 1.0 0.33378 0.82652 0.98670 1.0000  
O O3 1.0 0.26100 0.86522 0.08003 1.0000  
O O4 1.0 0.31658 0.49100 0.00627 1.0000

|   |     |     |         |         |         |        |
|---|-----|-----|---------|---------|---------|--------|
| O | O5  | 1.0 | 0.25456 | 0.49377 | 0.10100 | 1.0000 |
| O | O6  | 1.0 | 0.45951 | 0.51376 | 0.07758 | 1.0000 |
| O | O7  | 1.0 | 0.72165 | 0.65739 | 0.06197 | 1.0000 |
| O | O8  | 1.0 | 0.85152 | 0.82526 | 0.05431 | 1.0000 |
| O | O9  | 1.0 | 0.66702 | 0.83939 | 0.10566 | 1.0000 |
| O | O10 | 1.0 | 0.84494 | 0.48795 | 0.06379 | 1.0000 |
| O | O11 | 1.0 | 0.65518 | 0.47378 | 0.10320 | 1.0000 |
| O | O12 | 1.0 | 0.97749 | 0.65595 | 0.05341 | 1.0000 |
| O | O13 | 1.0 | 0.05005 | 0.83634 | 0.09010 | 1.0000 |
| O | O14 | 1.0 | 0.04306 | 0.47484 | 0.09258 | 1.0000 |
| O | O15 | 1.0 | 0.62768 | 0.33495 | 0.55426 | 1.0000 |
| O | O16 | 1.0 | 0.67814 | 0.17839 | 0.49150 | 1.0000 |
| O | O17 | 1.0 | 0.73567 | 0.16360 | 0.58856 | 1.0000 |
| O | O18 | 1.0 | 0.53305 | 0.14445 | 0.56154 | 1.0000 |
| O | O19 | 1.0 | 0.66929 | 0.51237 | 0.50116 | 1.0000 |
| O | O20 | 1.0 | 0.77045 | 0.47192 | 0.58846 | 1.0000 |
| O | O21 | 1.0 | 0.56328 | 0.52357 | 0.58480 | 1.0000 |
| O | O22 | 1.0 | 0.28240 | 0.33091 | 0.57036 | 1.0000 |
| O | O23 | 1.0 | 0.15001 | 0.16659 | 0.55487 | 1.0000 |
| O | O24 | 1.0 | 0.33048 | 0.14266 | 0.60763 | 1.0000 |
| O | O25 | 1.0 | 0.17217 | 0.50423 | 0.55132 | 1.0000 |
| O | O26 | 1.0 | 0.35307 | 0.52028 | 0.60130 | 1.0000 |
| O | O27 | 1.0 | 0.03259 | 0.34081 | 0.55408 | 1.0000 |
| O | O28 | 1.0 | 0.95058 | 0.15992 | 0.59152 | 1.0000 |
| O | O29 | 1.0 | 0.99404 | 0.51787 | 0.60424 | 1.0000 |
| O | O30 | 1.0 | 0.33257 | 0.38442 | 0.30958 | 1.0000 |
| O | O31 | 1.0 | 0.16360 | 0.32657 | 0.25357 | 1.0000 |
| O | O32 | 1.0 | 0.20677 | 0.22210 | 0.33816 | 1.0000 |
| O | O33 | 1.0 | 0.13609 | 0.42188 | 0.34057 | 1.0000 |
| O | O34 | 1.0 | 0.49425 | 0.34439 | 0.24628 | 1.0000 |
| O | O35 | 1.0 | 0.47410 | 0.23874 | 0.33401 | 1.0000 |
| O | O36 | 1.0 | 0.53181 | 0.44417 | 0.33069 | 1.0000 |
| O | O37 | 1.0 | 0.33762 | 0.73062 | 0.30367 | 1.0000 |
| O | O38 | 1.0 | 0.18067 | 0.62776 | 0.35158 | 1.0000 |



|   |     |     |         |         |         |        |
|---|-----|-----|---------|---------|---------|--------|
| O | O39 | 1.0 | 0.51434 | 0.84421 | 0.31191 | 1.0000 |
| O | O40 | 1.0 | 0.50679 | 0.65128 | 0.34975 | 1.0000 |
| O | O41 | 1.0 | 0.34173 | 0.96925 | 0.31338 | 1.0000 |
| O | O42 | 1.0 | 0.13809 | 0.02538 | 0.35660 | 1.0000 |
| O | O43 | 1.0 | 0.53061 | 0.03753 | 0.34453 | 1.0000 |
| O | O44 | 1.0 | 0.67463 | 0.61961 | 0.81019 | 1.0000 |
| O | O45 | 1.0 | 0.83030 | 0.65588 | 0.74072 | 1.0000 |
| O | O46 | 1.0 | 0.82687 | 0.76565 | 0.82615 | 1.0000 |
| O | O47 | 1.0 | 0.86977 | 0.55573 | 0.82480 | 1.0000 |
| O | O48 | 1.0 | 0.50743 | 0.64743 | 0.75070 | 1.0000 |
| O | O49 | 1.0 | 0.53966 | 0.77390 | 0.82989 | 1.0000 |
| O | O50 | 1.0 | 0.47935 | 0.57255 | 0.84361 | 1.0000 |
| O | O51 | 1.0 | 0.65488 | 0.28738 | 0.80774 | 1.0000 |
| O | O52 | 1.0 | 0.82197 | 0.16231 | 0.82478 | 1.0000 |
| O | O53 | 1.0 | 0.82034 | 0.35898 | 0.85723 | 1.0000 |
| O | O54 | 1.0 | 0.48586 | 0.16226 | 0.81857 | 1.0000 |
| O | O55 | 1.0 | 0.47329 | 0.36049 | 0.84428 | 1.0000 |
| O | O56 | 1.0 | 0.65502 | 0.03292 | 0.81172 | 1.0000 |
| O | O57 | 1.0 | 0.83219 | 0.96481 | 0.85532 | 1.0000 |
| O | O58 | 1.0 | 0.47105 | 0.96763 | 0.84915 | 1.0000 |
| O | O59 | 1.0 | 0.63038 | 0.65957 | 0.94276 | 1.0000 |
| O | O60 | 1.0 | 0.65996 | 0.82082 | 0.00713 | 1.0000 |
| O | O61 | 1.0 | 0.77232 | 0.81285 | 0.92126 | 1.0000 |
| O | O62 | 1.0 | 0.56162 | 0.85310 | 0.92217 | 1.0000 |
| O | O63 | 1.0 | 0.67669 | 0.49456 | 0.00271 | 1.0000 |
| O | O64 | 1.0 | 0.78341 | 0.52708 | 0.91640 | 1.0000 |
| O | O65 | 1.0 | 0.58005 | 0.46303 | 0.91559 | 1.0000 |
| O | O66 | 1.0 | 0.29351 | 0.64676 | 0.94043 | 1.0000 |
| O | O67 | 1.0 | 0.17028 | 0.81441 | 0.92270 | 1.0000 |
| O | O68 | 1.0 | 0.36665 | 0.80781 | 0.88744 | 1.0000 |
| O | O69 | 1.0 | 0.16686 | 0.47853 | 0.93551 | 1.0000 |
| O | O70 | 1.0 | 0.36765 | 0.46058 | 0.91103 | 1.0000 |
| O | O71 | 1.0 | 0.03773 | 0.64868 | 0.93326 | 1.0000 |
| O | O72 | 1.0 | 0.97268 | 0.83077 | 0.89279 | 1.0000 |

|   |      |     |         |         |         |        |
|---|------|-----|---------|---------|---------|--------|
| O | O73  | 1.0 | 0.97936 | 0.46157 | 0.89671 | 1.0000 |
| O | O74  | 1.0 | 0.34224 | 0.32096 | 0.43537 | 1.0000 |
| O | O75  | 1.0 | 0.34637 | 0.17531 | 0.51009 | 1.0000 |
| O | O76  | 1.0 | 0.22437 | 0.14303 | 0.43061 | 1.0000 |
| O | O77  | 1.0 | 0.43895 | 0.13829 | 0.42227 | 1.0000 |
| O | O78  | 1.0 | 0.35662 | 0.47366 | 0.50439 | 1.0000 |
| O | O79  | 1.0 | 0.22595 | 0.49278 | 0.42596 | 1.0000 |
| O | O80  | 1.0 | 0.43591 | 0.50678 | 0.41457 | 1.0000 |
| O | O81  | 1.0 | 0.70224 | 0.35600 | 0.43774 | 1.0000 |
| O | O82  | 1.0 | 0.83406 | 0.19374 | 0.42378 | 1.0000 |
| O | O83  | 1.0 | 0.63681 | 0.18179 | 0.39275 | 1.0000 |
| O | O84  | 1.0 | 0.83370 | 0.52464 | 0.43711 | 1.0000 |
| O | O85  | 1.0 | 0.64262 | 0.54380 | 0.40224 | 1.0000 |
| O | O86  | 1.0 | 0.96486 | 0.35790 | 0.44061 | 1.0000 |
| O | O87  | 1.0 | 0.03270 | 0.18633 | 0.39486 | 1.0000 |
| O | O88  | 1.0 | 0.02802 | 0.54430 | 0.40448 | 1.0000 |
| O | O89  | 1.0 | 0.66921 | 0.36239 | 0.69665 | 1.0000 |
| O | O90  | 1.0 | 0.83415 | 0.32180 | 0.75805 | 1.0000 |
| O | O91  | 1.0 | 0.84252 | 0.26187 | 0.66136 | 1.0000 |
| O | O92  | 1.0 | 0.49044 | 0.31493 | 0.74754 | 1.0000 |
| O | O93  | 1.0 | 0.52442 | 0.23440 | 0.65625 | 1.0000 |
| O | O94  | 1.0 | 0.48372 | 0.44202 | 0.67028 | 1.0000 |
| O | O95  | 1.0 | 0.66300 | 0.71788 | 0.68948 | 1.0000 |
| O | O96  | 1.0 | 0.83503 | 0.84762 | 0.69285 | 1.0000 |
| O | O97  | 1.0 | 0.84171 | 0.66644 | 0.64155 | 1.0000 |
| O | O98  | 1.0 | 0.49012 | 0.83104 | 0.70203 | 1.0000 |
| O | O99  | 1.0 | 0.47628 | 0.64987 | 0.65218 | 1.0000 |
| O | O100 | 1.0 | 0.66162 | 0.96240 | 0.69989 | 1.0000 |
| O | O101 | 1.0 | 0.83616 | 0.04857 | 0.65758 | 1.0000 |
| O | O102 | 1.0 | 0.48813 | 0.00798 | 0.64842 | 1.0000 |
| O | O103 | 1.0 | 0.32927 | 0.62766 | 0.19613 | 1.0000 |
| O | O104 | 1.0 | 0.16220 | 0.68032 | 0.25277 | 1.0000 |
| O | O105 | 1.0 | 0.18490 | 0.76658 | 0.16125 | 1.0000 |
| O | O106 | 1.0 | 0.13130 | 0.56292 | 0.17371 | 1.0000 |

|    |      |     |         |         |         |        |
|----|------|-----|---------|---------|---------|--------|
| O  | O107 | 1.0 | 0.50402 | 0.67555 | 0.25016 | 1.0000 |
| O  | O108 | 1.0 | 0.47064 | 0.76524 | 0.15926 | 1.0000 |
| O  | O109 | 1.0 | 0.52333 | 0.56100 | 0.17063 | 1.0000 |
| O  | O110 | 1.0 | 0.32546 | 0.29416 | 0.19135 | 1.0000 |
| O  | O111 | 1.0 | 0.15782 | 0.16020 | 0.19083 | 1.0000 |
| O  | O112 | 1.0 | 0.13955 | 0.35399 | 0.15554 | 1.0000 |
| O  | O113 | 1.0 | 0.49744 | 0.17223 | 0.18893 | 1.0000 |
| O  | O114 | 1.0 | 0.50194 | 0.35924 | 0.14536 | 1.0000 |
| O  | O115 | 1.0 | 0.32997 | 0.03949 | 0.18980 | 1.0000 |
| O  | O116 | 1.0 | 0.15046 | 0.97385 | 0.14699 | 1.0000 |
| O  | O117 | 1.0 | 0.51261 | 0.98696 | 0.14539 | 1.0000 |
| O  | O118 | 1.0 | 0.01634 | 0.81896 | 0.99154 | 1.0000 |
| O  | O119 | 1.0 | 0.99828 | 0.48613 | 0.99566 | 1.0000 |
| O  | O120 | 1.0 | 0.98424 | 0.17927 | 0.49363 | 1.0000 |
| O  | O121 | 1.0 | 0.98970 | 0.51878 | 0.50373 | 1.0000 |
| O  | O122 | 1.0 | 0.16140 | 0.98363 | 0.24712 | 1.0000 |
| O  | O123 | 1.0 | 0.50075 | 0.00065 | 0.24615 | 1.0000 |
| O  | O124 | 1.0 | 0.83038 | 0.01012 | 0.75600 | 1.0000 |
| O  | O125 | 1.0 | 0.48803 | 0.01258 | 0.74984 | 1.0000 |
| O  | O126 | 1.0 | 0.85497 | 0.46532 | 0.68684 | 1.0000 |
| O  | O127 | 1.0 | 0.46752 | 0.84223 | 0.06099 | 1.0000 |
| O  | O128 | 1.0 | 0.15897 | 0.82587 | 0.32486 | 1.0000 |
| Al | Al1  | 1.0 | 0.46221 | 0.13152 | 0.62504 | 1.0000 |
| Al | Al2  | 1.0 | 0.86561 | 0.53775 | 0.62354 | 1.0000 |
| Al | Al3  | 1.0 | 0.53707 | 0.86176 | 0.12477 | 1.0000 |
| Al | Al4  | 1.0 | 0.20570 | 0.96541 | 0.30781 | 1.0000 |
| Si | Si1  | 1.0 | 0.33952 | 0.54283 | 0.06095 | 1.0000 |
| Si | Si2  | 1.0 | 0.72721 | 0.78641 | 0.05937 | 1.0000 |
| Si | Si3  | 1.0 | 0.72365 | 0.52903 | 0.05792 | 1.0000 |
| Si | Si4  | 1.0 | 0.97327 | 0.78424 | 0.04764 | 1.0000 |
| Si | Si5  | 1.0 | 0.96568 | 0.52751 | 0.05144 | 1.0000 |
| Si | Si6  | 1.0 | 0.64982 | 0.20986 | 0.54903 | 1.0000 |
| Si | Si7  | 1.0 | 0.66066 | 0.46201 | 0.55802 | 1.0000 |
| Si | Si8  | 1.0 | 0.27425 | 0.20322 | 0.56200 | 1.0000 |

|    |      |     |         |         |         |        |
|----|------|-----|---------|---------|---------|--------|
| Si | Si9  | 1.0 | 0.29053 | 0.45691 | 0.55722 | 1.0000 |
| Si | Si10 | 1.0 | 0.02991 | 0.21302 | 0.54886 | 1.0000 |
| Si | Si11 | 1.0 | 0.04649 | 0.47029 | 0.55446 | 1.0000 |
| Si | Si12 | 1.0 | 0.21000 | 0.33759 | 0.31040 | 1.0000 |
| Si | Si13 | 1.0 | 0.45855 | 0.35180 | 0.30512 | 1.0000 |
| Si | Si14 | 1.0 | 0.46799 | 0.72563 | 0.30363 | 1.0000 |
| Si | Si15 | 1.0 | 0.46781 | 0.96416 | 0.30330 | 1.0000 |
| Si | Si16 | 1.0 | 0.14364 | 0.51881 | 0.38050 | 1.0000 |
| Si | Si17 | 1.0 | 0.79975 | 0.65156 | 0.80094 | 1.0000 |
| Si | Si18 | 1.0 | 0.54918 | 0.65336 | 0.80842 | 1.0000 |
| Si | Si19 | 1.0 | 0.78269 | 0.28180 | 0.81214 | 1.0000 |
| Si | Si20 | 1.0 | 0.52589 | 0.28158 | 0.80409 | 1.0000 |
| Si | Si21 | 1.0 | 0.78425 | 0.04143 | 0.81143 | 1.0000 |
| Si | Si22 | 1.0 | 0.52611 | 0.04344 | 0.80628 | 1.0000 |
| Si | Si23 | 1.0 | 0.86112 | 0.47578 | 0.87378 | 1.0000 |
| Si | Si24 | 1.0 | 0.65794 | 0.78615 | 0.94758 | 1.0000 |
| Si | Si25 | 1.0 | 0.66797 | 0.53549 | 0.94463 | 1.0000 |
| Si | Si26 | 1.0 | 0.29010 | 0.77403 | 0.93410 | 1.0000 |
| Si | Si27 | 1.0 | 0.28650 | 0.51937 | 0.94824 | 1.0000 |
| Si | Si28 | 1.0 | 0.04808 | 0.77744 | 0.93551 | 1.0000 |
| Si | Si29 | 1.0 | 0.04589 | 0.52045 | 0.94088 | 1.0000 |
| Si | Si30 | 1.0 | 0.48517 | 0.84971 | 0.87211 | 1.0000 |
| Si | Si31 | 1.0 | 0.33699 | 0.19441 | 0.44861 | 1.0000 |
| Si | Si32 | 1.0 | 0.34036 | 0.44839 | 0.44504 | 1.0000 |
| Si | Si33 | 1.0 | 0.71296 | 0.22822 | 0.43624 | 1.0000 |
| Si | Si34 | 1.0 | 0.71169 | 0.48379 | 0.44503 | 1.0000 |
| Si | Si35 | 1.0 | 0.95502 | 0.22944 | 0.43852 | 1.0000 |
| Si | Si36 | 1.0 | 0.95403 | 0.48530 | 0.44732 | 1.0000 |
| Si | Si37 | 1.0 | 0.51874 | 0.14928 | 0.37298 | 1.0000 |
| Si | Si38 | 1.0 | 0.54043 | 0.33566 | 0.69133 | 1.0000 |
| Si | Si39 | 1.0 | 0.79261 | 0.72469 | 0.68928 | 1.0000 |
| Si | Si40 | 1.0 | 0.53465 | 0.71176 | 0.69795 | 1.0000 |
| Si | Si41 | 1.0 | 0.79008 | 0.96720 | 0.70104 | 1.0000 |
| Si | Si42 | 1.0 | 0.53153 | 0.95420 | 0.69879 | 1.0000 |

|    |      |     |         |         |         |        |
|----|------|-----|---------|---------|---------|--------|
| Si | Si43 | 1.0 | 0.20422 | 0.66043 | 0.19489 | 1.0000 |
| Si | Si44 | 1.0 | 0.45706 | 0.66036 | 0.19319 | 1.0000 |
| Si | Si45 | 1.0 | 0.19743 | 0.28179 | 0.19810 | 1.0000 |
| Si | Si46 | 1.0 | 0.45469 | 0.29173 | 0.19318 | 1.0000 |
| Si | Si47 | 1.0 | 0.20077 | 0.03835 | 0.19512 | 1.0000 |
| Si | Si48 | 1.0 | 0.45983 | 0.04763 | 0.19196 | 1.0000 |
| Si | Si49 | 1.0 | 0.14253 | 0.47154 | 0.13081 | 1.0000 |
| Si | Si50 | 1.0 | 0.16041 | 0.86000 | 0.12025 | 1.0000 |
| Si | Si51 | 1.0 | 0.53395 | 0.47691 | 0.12508 | 1.0000 |
| Si | Si52 | 1.0 | 0.84154 | 0.15777 | 0.62456 | 1.0000 |
| Si | Si53 | 1.0 | 0.46987 | 0.53276 | 0.62695 | 1.0000 |
| Si | Si54 | 1.0 | 0.14944 | 0.14199 | 0.37973 | 1.0000 |
| Si | Si55 | 1.0 | 0.52883 | 0.53546 | 0.37382 | 1.0000 |
| Si | Si56 | 1.0 | 0.85066 | 0.84352 | 0.87381 | 1.0000 |
| Si | Si57 | 1.0 | 0.47656 | 0.46520 | 0.87848 | 1.0000 |
| Si | Si58 | 1.0 | 0.79581 | 0.34634 | 0.70071 | 1.0000 |
| Si | Si59 | 1.0 | 0.34281 | 0.79851 | 0.04639 | 1.0000 |
| Si | Si60 | 1.0 | 0.21248 | 0.70855 | 0.30702 | 1.0000 |

AlSiAl-T2T7T7T9:

data\_image0

\_chemical\_formula\_structural H4O128Al4Si60  
\_chemical\_formula\_sum "H4 O128 Al4 Si60"  
\_cell\_length\_a 12.5456  
\_cell\_length\_b 12.5066  
\_cell\_length\_c 26.4317  
\_cell\_angle\_alpha 90.1171  
\_cell\_angle\_beta 90.2817  
\_cell\_angle\_gamma 90.5789

\_space\_group\_name\_H-M\_alt "P 1"  
\_space\_group\_IT\_number 1

loop\_

\_space\_group\_symop\_operation\_xyz  
'x, y, z'

loop\_

\_atom\_site\_type\_symbol  
\_atom\_site\_label  
\_atom\_site\_symmetry\_multiplicity  
\_atom\_site\_fract\_x  
\_atom\_site\_fract\_y  
\_atom\_site\_fract\_z  
\_atom\_site\_occupancy  
H H1 1.0 0.47916 0.15168 0.52966 1.0000  
H H2 1.0 0.85303 0.51333 0.71906 1.0000  
H H3 1.0 0.55972 0.83427 0.35032 1.0000  
H H4 1.0 0.92621 0.98880 0.64269 1.0000  
O O1 1.0 0.29399 0.65946 0.06181 1.0000  
O O2 1.0 0.34419 0.81847 0.99861 1.0000  
O O3 1.0 0.23168 0.85667 0.08066 1.0000  
O O4 1.0 0.43880 0.80699 0.08644 1.0000

|   |     |     |         |         |         |        |
|---|-----|-----|---------|---------|---------|--------|
| O | O5  | 1.0 | 0.34082 | 0.50638 | 0.99489 | 1.0000 |
| O | O6  | 1.0 | 0.22851 | 0.46170 | 0.07729 | 1.0000 |
| O | O7  | 1.0 | 0.43806 | 0.50886 | 0.08196 | 1.0000 |
| O | O8  | 1.0 | 0.70186 | 0.67378 | 0.06392 | 1.0000 |
| O | O9  | 1.0 | 0.83071 | 0.84275 | 0.05853 | 1.0000 |
| O | O10 | 1.0 | 0.64036 | 0.86421 | 0.09667 | 1.0000 |
| O | O11 | 1.0 | 0.83050 | 0.50460 | 0.06303 | 1.0000 |
| O | O12 | 1.0 | 0.64276 | 0.49125 | 0.10566 | 1.0000 |
| O | O13 | 1.0 | 0.95915 | 0.67332 | 0.05668 | 1.0000 |
| O | O14 | 1.0 | 0.02214 | 0.85552 | 0.09793 | 1.0000 |
| O | O15 | 1.0 | 0.02461 | 0.49683 | 0.10171 | 1.0000 |
| O | O16 | 1.0 | 0.64080 | 0.33009 | 0.54880 | 1.0000 |
| O | O17 | 1.0 | 0.68442 | 0.16965 | 0.48634 | 1.0000 |
| O | O18 | 1.0 | 0.73539 | 0.15172 | 0.58507 | 1.0000 |
| O | O19 | 1.0 | 0.53596 | 0.14677 | 0.55635 | 1.0000 |
| O | O20 | 1.0 | 0.68468 | 0.51174 | 0.50120 | 1.0000 |
| O | O21 | 1.0 | 0.77330 | 0.46931 | 0.59168 | 1.0000 |
| O | O22 | 1.0 | 0.56532 | 0.51300 | 0.58198 | 1.0000 |
| O | O23 | 1.0 | 0.28790 | 0.32800 | 0.56560 | 1.0000 |
| O | O24 | 1.0 | 0.16172 | 0.15482 | 0.55098 | 1.0000 |
| O | O25 | 1.0 | 0.34027 | 0.14230 | 0.60498 | 1.0000 |
| O | O26 | 1.0 | 0.17245 | 0.50064 | 0.55313 | 1.0000 |
| O | O27 | 1.0 | 0.35709 | 0.51416 | 0.60158 | 1.0000 |
| O | O28 | 1.0 | 0.04379 | 0.32803 | 0.55320 | 1.0000 |
| O | O29 | 1.0 | 0.96793 | 0.14407 | 0.59033 | 1.0000 |
| O | O30 | 1.0 | 0.00038 | 0.49599 | 0.61062 | 1.0000 |
| O | O31 | 1.0 | 0.34230 | 0.38122 | 0.31167 | 1.0000 |
| O | O32 | 1.0 | 0.17475 | 0.34473 | 0.25156 | 1.0000 |
| O | O33 | 1.0 | 0.20774 | 0.22016 | 0.33112 | 1.0000 |
| O | O34 | 1.0 | 0.14672 | 0.42233 | 0.34373 | 1.0000 |
| O | O35 | 1.0 | 0.49284 | 0.34044 | 0.24274 | 1.0000 |
| O | O36 | 1.0 | 0.48451 | 0.22803 | 0.32679 | 1.0000 |
| O | O37 | 1.0 | 0.54412 | 0.43531 | 0.32826 | 1.0000 |
| O | O38 | 1.0 | 0.32841 | 0.71915 | 0.31259 | 1.0000 |

|   |     |     |         |         |         |        |
|---|-----|-----|---------|---------|---------|--------|
| O | O39 | 1.0 | 0.14888 | 0.82966 | 0.31091 | 1.0000 |
| O | O40 | 1.0 | 0.14988 | 0.63532 | 0.34690 | 1.0000 |
| O | O41 | 1.0 | 0.49698 | 0.63288 | 0.35801 | 1.0000 |
| O | O42 | 1.0 | 0.31905 | 0.95913 | 0.31037 | 1.0000 |
| O | O43 | 1.0 | 0.13482 | 0.02336 | 0.34866 | 1.0000 |
| O | O44 | 1.0 | 0.51788 | 0.02961 | 0.35612 | 1.0000 |
| O | O45 | 1.0 | 0.67135 | 0.67480 | 0.81552 | 1.0000 |
| O | O46 | 1.0 | 0.82175 | 0.64302 | 0.74405 | 1.0000 |
| O | O47 | 1.0 | 0.86278 | 0.75867 | 0.82614 | 1.0000 |
| O | O48 | 1.0 | 0.83704 | 0.54483 | 0.82936 | 1.0000 |
| O | O49 | 1.0 | 0.51977 | 0.64770 | 0.74655 | 1.0000 |
| O | O50 | 1.0 | 0.47741 | 0.74707 | 0.83353 | 1.0000 |
| O | O51 | 1.0 | 0.50825 | 0.53969 | 0.83066 | 1.0000 |
| O | O52 | 1.0 | 0.65551 | 0.31449 | 0.81632 | 1.0000 |
| O | O53 | 1.0 | 0.79758 | 0.15730 | 0.82763 | 1.0000 |
| O | O54 | 1.0 | 0.83751 | 0.34782 | 0.86423 | 1.0000 |
| O | O55 | 1.0 | 0.51500 | 0.15487 | 0.81717 | 1.0000 |
| O | O56 | 1.0 | 0.45984 | 0.34054 | 0.84910 | 1.0000 |
| O | O57 | 1.0 | 0.65788 | 0.99903 | 0.80685 | 1.0000 |
| O | O58 | 1.0 | 0.83940 | 0.96136 | 0.85346 | 1.0000 |
| O | O59 | 1.0 | 0.46262 | 0.95740 | 0.83497 | 1.0000 |
| O | O60 | 1.0 | 0.62337 | 0.66058 | 0.93731 | 1.0000 |
| O | O61 | 1.0 | 0.66036 | 0.82810 | 0.99792 | 1.0000 |
| O | O62 | 1.0 | 0.77700 | 0.80227 | 0.91577 | 1.0000 |
| O | O63 | 1.0 | 0.57251 | 0.85646 | 0.90789 | 1.0000 |
| O | O64 | 1.0 | 0.65384 | 0.50658 | 0.00614 | 1.0000 |
| O | O65 | 1.0 | 0.76554 | 0.50830 | 0.92233 | 1.0000 |
| O | O66 | 1.0 | 0.55643 | 0.46127 | 0.92059 | 1.0000 |
| O | O67 | 1.0 | 0.28829 | 0.66591 | 0.93341 | 1.0000 |
| O | O68 | 1.0 | 0.16964 | 0.83921 | 0.94124 | 1.0000 |
| O | O69 | 1.0 | 0.35954 | 0.85128 | 0.90077 | 1.0000 |
| O | O70 | 1.0 | 0.16320 | 0.49481 | 0.93957 | 1.0000 |
| O | O71 | 1.0 | 0.35141 | 0.48444 | 0.89544 | 1.0000 |
| O | O72 | 1.0 | 0.04076 | 0.66798 | 0.94442 | 1.0000 |



|   |      |     |         |         |         |        |
|---|------|-----|---------|---------|---------|--------|
| O | O73  | 1.0 | 0.98140 | 0.84556 | 0.89848 | 1.0000 |
| O | O74  | 1.0 | 0.97074 | 0.48824 | 0.90247 | 1.0000 |
| O | O75  | 1.0 | 0.30528 | 0.32545 | 0.43847 | 1.0000 |
| O | O76  | 1.0 | 0.35081 | 0.17153 | 0.50621 | 1.0000 |
| O | O77  | 1.0 | 0.24474 | 0.12787 | 0.41992 | 1.0000 |
| O | O78  | 1.0 | 0.45522 | 0.17727 | 0.42324 | 1.0000 |
| O | O79  | 1.0 | 0.35404 | 0.48228 | 0.50315 | 1.0000 |
| O | O80  | 1.0 | 0.26110 | 0.52564 | 0.41419 | 1.0000 |
| O | O81  | 1.0 | 0.46193 | 0.46497 | 0.41938 | 1.0000 |
| O | O82  | 1.0 | 0.71784 | 0.35163 | 0.43766 | 1.0000 |
| O | O83  | 1.0 | 0.84483 | 0.18507 | 0.42078 | 1.0000 |
| O | O84  | 1.0 | 0.64961 | 0.18258 | 0.38679 | 1.0000 |
| O | O85  | 1.0 | 0.84660 | 0.52232 | 0.43561 | 1.0000 |
| O | O86  | 1.0 | 0.65492 | 0.53797 | 0.40136 | 1.0000 |
| O | O87  | 1.0 | 0.97000 | 0.35032 | 0.44295 | 1.0000 |
| O | O88  | 1.0 | 0.04621 | 0.18497 | 0.39418 | 1.0000 |
| O | O89  | 1.0 | 0.05004 | 0.53558 | 0.41613 | 1.0000 |
| O | O90  | 1.0 | 0.67272 | 0.35781 | 0.70154 | 1.0000 |
| O | O91  | 1.0 | 0.83484 | 0.31787 | 0.76428 | 1.0000 |
| O | O92  | 1.0 | 0.84515 | 0.25112 | 0.66853 | 1.0000 |
| O | O93  | 1.0 | 0.49475 | 0.31269 | 0.74971 | 1.0000 |
| O | O94  | 1.0 | 0.52922 | 0.23084 | 0.65725 | 1.0000 |
| O | O95  | 1.0 | 0.49154 | 0.43990 | 0.67066 | 1.0000 |
| O | O96  | 1.0 | 0.67151 | 0.71401 | 0.68274 | 1.0000 |
| O | O97  | 1.0 | 0.84407 | 0.83523 | 0.70071 | 1.0000 |
| O | O98  | 1.0 | 0.85936 | 0.65735 | 0.64603 | 1.0000 |
| O | O99  | 1.0 | 0.50382 | 0.83179 | 0.69799 | 1.0000 |
| O | O100 | 1.0 | 0.48348 | 0.64707 | 0.64851 | 1.0000 |
| O | O101 | 1.0 | 0.67467 | 0.96367 | 0.69205 | 1.0000 |
| O | O102 | 1.0 | 0.50186 | 0.00345 | 0.63921 | 1.0000 |
| O | O103 | 1.0 | 0.34293 | 0.69260 | 0.18875 | 1.0000 |
| O | O104 | 1.0 | 0.17573 | 0.66116 | 0.24910 | 1.0000 |
| O | O105 | 1.0 | 0.15492 | 0.77307 | 0.16549 | 1.0000 |
| O | O106 | 1.0 | 0.18363 | 0.56210 | 0.16232 | 1.0000 |

|    |      |     |         |         |         |        |
|----|------|-----|---------|---------|---------|--------|
| O  | O107 | 1.0 | 0.49725 | 0.66654 | 0.25771 | 1.0000 |
| O  | O108 | 1.0 | 0.53765 | 0.76821 | 0.17231 | 1.0000 |
| O  | O109 | 1.0 | 0.50317 | 0.55598 | 0.17461 | 1.0000 |
| O  | O110 | 1.0 | 0.32517 | 0.29699 | 0.18473 | 1.0000 |
| O  | O111 | 1.0 | 0.15606 | 0.16923 | 0.19456 | 1.0000 |
| O  | O112 | 1.0 | 0.13418 | 0.35749 | 0.15319 | 1.0000 |
| O  | O113 | 1.0 | 0.49225 | 0.16436 | 0.18518 | 1.0000 |
| O  | O114 | 1.0 | 0.50708 | 0.35430 | 0.14338 | 1.0000 |
| O  | O115 | 1.0 | 0.32370 | 0.03852 | 0.19407 | 1.0000 |
| O  | O116 | 1.0 | 0.14352 | 0.98327 | 0.14938 | 1.0000 |
| O  | O117 | 1.0 | 0.49485 | 0.97107 | 0.14611 | 1.0000 |
| O  | O118 | 1.0 | 0.99769 | 0.84145 | 0.99841 | 1.0000 |
| O  | O119 | 1.0 | 0.99821 | 0.49980 | 0.00216 | 1.0000 |
| O  | O120 | 1.0 | 0.99370 | 0.16675 | 0.49156 | 1.0000 |
| O  | O121 | 1.0 | 0.98350 | 0.50819 | 0.51063 | 1.0000 |
| O  | O122 | 1.0 | 0.15184 | 0.99387 | 0.24944 | 1.0000 |
| O  | O123 | 1.0 | 0.49952 | 0.99280 | 0.24623 | 1.0000 |
| O  | O124 | 1.0 | 0.83580 | 0.01509 | 0.75507 | 1.0000 |
| O  | O125 | 1.0 | 0.50050 | 0.02165 | 0.74005 | 1.0000 |
| O  | O126 | 1.0 | 0.85730 | 0.45812 | 0.69192 | 1.0000 |
| O  | O127 | 1.0 | 0.50573 | 0.82854 | 0.32371 | 1.0000 |
| O  | O128 | 1.0 | 0.86132 | 0.02223 | 0.65532 | 1.0000 |
| Al | Al1  | 1.0 | 0.47304 | 0.13119 | 0.62050 | 1.0000 |
| Al | Al2  | 1.0 | 0.87314 | 0.52472 | 0.62836 | 1.0000 |
| Al | Al3  | 1.0 | 0.45457 | 0.96632 | 0.30629 | 1.0000 |
| Al | Al4  | 1.0 | 0.84918 | 0.15621 | 0.62159 | 1.0000 |
| Si | Si1  | 1.0 | 0.32735 | 0.78586 | 0.05744 | 1.0000 |
| Si | Si2  | 1.0 | 0.32577 | 0.53376 | 0.05449 | 1.0000 |
| Si | Si3  | 1.0 | 0.70808 | 0.80178 | 0.05403 | 1.0000 |
| Si | Si4  | 1.0 | 0.70799 | 0.54466 | 0.05939 | 1.0000 |
| Si | Si5  | 1.0 | 0.95236 | 0.80246 | 0.05289 | 1.0000 |
| Si | Si6  | 1.0 | 0.95316 | 0.54391 | 0.05586 | 1.0000 |
| Si | Si7  | 1.0 | 0.52720 | 0.85417 | 0.12590 | 1.0000 |
| Si | Si8  | 1.0 | 0.65722 | 0.20260 | 0.54432 | 1.0000 |

|    |      |     |         |         |         |        |
|----|------|-----|---------|---------|---------|--------|
| Si | Si9  | 1.0 | 0.66896 | 0.45713 | 0.55701 | 1.0000 |
| Si | Si10 | 1.0 | 0.28211 | 0.19909 | 0.55885 | 1.0000 |
| Si | Si11 | 1.0 | 0.29244 | 0.45571 | 0.55611 | 1.0000 |
| Si | Si12 | 1.0 | 0.04029 | 0.19904 | 0.54752 | 1.0000 |
| Si | Si13 | 1.0 | 0.04986 | 0.45753 | 0.55829 | 1.0000 |
| Si | Si14 | 1.0 | 0.21734 | 0.34164 | 0.30970 | 1.0000 |
| Si | Si15 | 1.0 | 0.46595 | 0.34516 | 0.30247 | 1.0000 |
| Si | Si16 | 1.0 | 0.19933 | 0.71243 | 0.30459 | 1.0000 |
| Si | Si17 | 1.0 | 0.19217 | 0.95271 | 0.30476 | 1.0000 |
| Si | Si18 | 1.0 | 0.15245 | 0.52763 | 0.38019 | 1.0000 |
| Si | Si19 | 1.0 | 0.79709 | 0.65574 | 0.80467 | 1.0000 |
| Si | Si20 | 1.0 | 0.54383 | 0.65268 | 0.80665 | 1.0000 |
| Si | Si21 | 1.0 | 0.78067 | 0.28381 | 0.81786 | 1.0000 |
| Si | Si22 | 1.0 | 0.53094 | 0.28110 | 0.80664 | 1.0000 |
| Si | Si23 | 1.0 | 0.78237 | 0.03395 | 0.81106 | 1.0000 |
| Si | Si24 | 1.0 | 0.53353 | 0.03366 | 0.79915 | 1.0000 |
| Si | Si25 | 1.0 | 0.85165 | 0.47249 | 0.88021 | 1.0000 |
| Si | Si26 | 1.0 | 0.65826 | 0.78680 | 0.93966 | 1.0000 |
| Si | Si27 | 1.0 | 0.64956 | 0.53418 | 0.94635 | 1.0000 |
| Si | Si28 | 1.0 | 0.28993 | 0.79333 | 0.94385 | 1.0000 |
| Si | Si29 | 1.0 | 0.28565 | 0.53777 | 0.94114 | 1.0000 |
| Si | Si30 | 1.0 | 0.04746 | 0.79757 | 0.94595 | 1.0000 |
| Si | Si31 | 1.0 | 0.04321 | 0.53858 | 0.94756 | 1.0000 |
| Si | Si32 | 1.0 | 0.46982 | 0.85178 | 0.86970 | 1.0000 |
| Si | Si33 | 1.0 | 0.33820 | 0.20023 | 0.44596 | 1.0000 |
| Si | Si34 | 1.0 | 0.34466 | 0.45002 | 0.44401 | 1.0000 |
| Si | Si35 | 1.0 | 0.72437 | 0.22279 | 0.43306 | 1.0000 |
| Si | Si36 | 1.0 | 0.72582 | 0.48021 | 0.44504 | 1.0000 |
| Si | Si37 | 1.0 | 0.96456 | 0.22156 | 0.43781 | 1.0000 |
| Si | Si38 | 1.0 | 0.96299 | 0.47809 | 0.45180 | 1.0000 |
| Si | Si39 | 1.0 | 0.52679 | 0.15230 | 0.37297 | 1.0000 |
| Si | Si40 | 1.0 | 0.54527 | 0.33229 | 0.69334 | 1.0000 |
| Si | Si41 | 1.0 | 0.79905 | 0.71288 | 0.69149 | 1.0000 |
| Si | Si42 | 1.0 | 0.54418 | 0.70981 | 0.69373 | 1.0000 |

|    |      |     |         |         |         |        |
|----|------|-----|---------|---------|---------|--------|
| Si | Si43 | 1.0 | 0.54323 | 0.95505 | 0.69095 | 1.0000 |
| Si | Si44 | 1.0 | 0.21424 | 0.67214 | 0.19085 | 1.0000 |
| Si | Si45 | 1.0 | 0.46949 | 0.67080 | 0.19720 | 1.0000 |
| Si | Si46 | 1.0 | 0.19826 | 0.29167 | 0.19632 | 1.0000 |
| Si | Si47 | 1.0 | 0.45384 | 0.28705 | 0.18937 | 1.0000 |
| Si | Si48 | 1.0 | 0.19539 | 0.04619 | 0.19739 | 1.0000 |
| Si | Si49 | 1.0 | 0.45350 | 0.04081 | 0.19434 | 1.0000 |
| Si | Si50 | 1.0 | 0.14242 | 0.47014 | 0.12335 | 1.0000 |
| Si | Si51 | 1.0 | 0.13916 | 0.86643 | 0.12344 | 1.0000 |
| Si | Si52 | 1.0 | 0.52202 | 0.47766 | 0.12630 | 1.0000 |
| Si | Si53 | 1.0 | 0.47577 | 0.52630 | 0.62551 | 1.0000 |
| Si | Si54 | 1.0 | 0.15795 | 0.13945 | 0.37373 | 1.0000 |
| Si | Si55 | 1.0 | 0.53895 | 0.51591 | 0.37656 | 1.0000 |
| Si | Si56 | 1.0 | 0.86332 | 0.84199 | 0.87384 | 1.0000 |
| Si | Si57 | 1.0 | 0.46917 | 0.45798 | 0.87459 | 1.0000 |
| Si | Si58 | 1.0 | 0.79913 | 0.33828 | 0.70584 | 1.0000 |
| Si | Si59 | 1.0 | 0.45420 | 0.70439 | 0.31206 | 1.0000 |
| Si | Si60 | 1.0 | 0.79904 | 0.95551 | 0.70331 | 1.0000 |

AlSiAl-T7T7T7T9:

data\_image0

\_chemical\_formula\_structural H4O128Al4Si60  
\_chemical\_formula\_sum "H4 O128 Al4 Si60"  
\_cell\_length\_a 12.5173  
\_cell\_length\_b 12.5866  
\_cell\_length\_c 26.4477  
\_cell\_angle\_alpha 89.8742  
\_cell\_angle\_beta 90.1761  
\_cell\_angle\_gamma 90.7997

\_space\_group\_name\_H-M\_alt "P 1"  
\_space\_group\_IT\_number 1

loop\_

\_space\_group\_symop\_operation\_xyz  
'x, y, z'

loop\_

\_atom\_site\_type\_symbol  
\_atom\_site\_label  
\_atom\_site\_symmetry\_multiplicity  
\_atom\_site\_fract\_x  
\_atom\_site\_fract\_y  
\_atom\_site\_fract\_z  
\_atom\_site\_occupancy  
H H1 1.0 0.47522 0.15084 0.53191 1.0000  
H H2 1.0 0.86061 0.51689 0.71676 1.0000  
H H3 1.0 0.51847 0.84332 0.03610 1.0000  
H H4 1.0 0.91650 0.99230 0.64385 1.0000  
O O1 1.0 0.32337 0.67383 0.06039 1.0000  
O O2 1.0 0.33478 0.82644 0.98907 1.0000  
O O3 1.0 0.25914 0.86840 0.08148 1.0000  
O O4 1.0 0.32785 0.49808 0.00442 1.0000

|   |     |     |         |         |         |        |
|---|-----|-----|---------|---------|---------|--------|
| O | O5  | 1.0 | 0.25343 | 0.48749 | 0.09686 | 1.0000 |
| O | O6  | 1.0 | 0.45994 | 0.51977 | 0.08018 | 1.0000 |
| O | O7  | 1.0 | 0.72008 | 0.65823 | 0.06147 | 1.0000 |
| O | O8  | 1.0 | 0.85087 | 0.82528 | 0.05574 | 1.0000 |
| O | O9  | 1.0 | 0.66722 | 0.83953 | 0.10675 | 1.0000 |
| O | O10 | 1.0 | 0.84233 | 0.48834 | 0.06262 | 1.0000 |
| O | O11 | 1.0 | 0.65578 | 0.47597 | 0.10417 | 1.0000 |
| O | O12 | 1.0 | 0.97686 | 0.65569 | 0.05673 | 1.0000 |
| O | O13 | 1.0 | 0.04897 | 0.83681 | 0.09291 | 1.0000 |
| O | O14 | 1.0 | 0.04131 | 0.46897 | 0.09015 | 1.0000 |
| O | O15 | 1.0 | 0.63189 | 0.32984 | 0.55061 | 1.0000 |
| O | O16 | 1.0 | 0.68032 | 0.17135 | 0.48833 | 1.0000 |
| O | O17 | 1.0 | 0.73243 | 0.15543 | 0.58657 | 1.0000 |
| O | O18 | 1.0 | 0.53234 | 0.14354 | 0.55838 | 1.0000 |
| O | O19 | 1.0 | 0.68100 | 0.50678 | 0.50040 | 1.0000 |
| O | O20 | 1.0 | 0.76761 | 0.46840 | 0.59129 | 1.0000 |
| O | O21 | 1.0 | 0.56095 | 0.51661 | 0.58060 | 1.0000 |
| O | O22 | 1.0 | 0.28499 | 0.33220 | 0.56906 | 1.0000 |
| O | O23 | 1.0 | 0.15782 | 0.16361 | 0.54961 | 1.0000 |
| O | O24 | 1.0 | 0.33534 | 0.14477 | 0.60541 | 1.0000 |
| O | O25 | 1.0 | 0.16890 | 0.50085 | 0.55030 | 1.0000 |
| O | O26 | 1.0 | 0.35208 | 0.52154 | 0.60048 | 1.0000 |
| O | O27 | 1.0 | 0.03470 | 0.33244 | 0.55469 | 1.0000 |
| O | O28 | 1.0 | 0.96611 | 0.14732 | 0.59265 | 1.0000 |
| O | O29 | 1.0 | 0.99422 | 0.50925 | 0.60555 | 1.0000 |
| O | O30 | 1.0 | 0.33932 | 0.38303 | 0.31073 | 1.0000 |
| O | O31 | 1.0 | 0.16950 | 0.33456 | 0.25333 | 1.0000 |
| O | O32 | 1.0 | 0.20179 | 0.23027 | 0.33803 | 1.0000 |
| O | O33 | 1.0 | 0.14414 | 0.43382 | 0.33997 | 1.0000 |
| O | O34 | 1.0 | 0.49647 | 0.34966 | 0.24410 | 1.0000 |
| O | O35 | 1.0 | 0.48828 | 0.24049 | 0.32961 | 1.0000 |
| O | O36 | 1.0 | 0.53828 | 0.44863 | 0.32857 | 1.0000 |
| O | O37 | 1.0 | 0.33061 | 0.71817 | 0.30723 | 1.0000 |
| O | O38 | 1.0 | 0.15815 | 0.83668 | 0.31399 | 1.0000 |

|   |     |     |         |         |         |        |
|---|-----|-----|---------|---------|---------|--------|
| O | O39 | 1.0 | 0.15663 | 0.64443 | 0.35045 | 1.0000 |
| O | O40 | 1.0 | 0.50192 | 0.84179 | 0.31308 | 1.0000 |
| O | O41 | 1.0 | 0.50395 | 0.65105 | 0.35372 | 1.0000 |
| O | O42 | 1.0 | 0.32964 | 0.96534 | 0.30707 | 1.0000 |
| O | O43 | 1.0 | 0.14815 | 0.02837 | 0.34838 | 1.0000 |
| O | O44 | 1.0 | 0.50895 | 0.03498 | 0.34772 | 1.0000 |
| O | O45 | 1.0 | 0.67163 | 0.62540 | 0.81061 | 1.0000 |
| O | O46 | 1.0 | 0.83159 | 0.64937 | 0.74318 | 1.0000 |
| O | O47 | 1.0 | 0.83005 | 0.76419 | 0.82755 | 1.0000 |
| O | O48 | 1.0 | 0.86322 | 0.55214 | 0.82738 | 1.0000 |
| O | O49 | 1.0 | 0.50566 | 0.64960 | 0.74895 | 1.0000 |
| O | O50 | 1.0 | 0.53095 | 0.77380 | 0.82963 | 1.0000 |
| O | O51 | 1.0 | 0.47703 | 0.57050 | 0.84065 | 1.0000 |
| O | O52 | 1.0 | 0.65285 | 0.28391 | 0.81004 | 1.0000 |
| O | O53 | 1.0 | 0.82317 | 0.16330 | 0.82600 | 1.0000 |
| O | O54 | 1.0 | 0.81589 | 0.35667 | 0.86263 | 1.0000 |
| O | O55 | 1.0 | 0.48248 | 0.16148 | 0.81553 | 1.0000 |
| O | O56 | 1.0 | 0.47069 | 0.35859 | 0.84409 | 1.0000 |
| O | O57 | 1.0 | 0.65541 | 0.03511 | 0.81117 | 1.0000 |
| O | O58 | 1.0 | 0.83011 | 0.96442 | 0.85635 | 1.0000 |
| O | O59 | 1.0 | 0.47236 | 0.96960 | 0.84845 | 1.0000 |
| O | O60 | 1.0 | 0.62885 | 0.66068 | 0.94342 | 1.0000 |
| O | O61 | 1.0 | 0.65924 | 0.82269 | 0.00776 | 1.0000 |
| O | O62 | 1.0 | 0.77144 | 0.81254 | 0.92203 | 1.0000 |
| O | O63 | 1.0 | 0.56198 | 0.85417 | 0.92170 | 1.0000 |
| O | O64 | 1.0 | 0.66979 | 0.49467 | 0.00339 | 1.0000 |
| O | O65 | 1.0 | 0.78338 | 0.52756 | 0.91979 | 1.0000 |
| O | O66 | 1.0 | 0.57878 | 0.46569 | 0.91406 | 1.0000 |
| O | O67 | 1.0 | 0.29295 | 0.65099 | 0.93849 | 1.0000 |
| O | O68 | 1.0 | 0.16939 | 0.82002 | 0.92561 | 1.0000 |
| O | O69 | 1.0 | 0.36383 | 0.81701 | 0.88930 | 1.0000 |
| O | O70 | 1.0 | 0.16756 | 0.48179 | 0.93835 | 1.0000 |
| O | O71 | 1.0 | 0.36517 | 0.46431 | 0.90864 | 1.0000 |
| O | O72 | 1.0 | 0.03956 | 0.65189 | 0.93254 | 1.0000 |

|   |      |     |         |         |         |        |
|---|------|-----|---------|---------|---------|--------|
| O | O73  | 1.0 | 0.97193 | 0.83536 | 0.89560 | 1.0000 |
| O | O74  | 1.0 | 0.98034 | 0.46354 | 0.89674 | 1.0000 |
| O | O75  | 1.0 | 0.31743 | 0.32766 | 0.43506 | 1.0000 |
| O | O76  | 1.0 | 0.35106 | 0.18078 | 0.50748 | 1.0000 |
| O | O77  | 1.0 | 0.23496 | 0.13477 | 0.42552 | 1.0000 |
| O | O78  | 1.0 | 0.44805 | 0.16373 | 0.42169 | 1.0000 |
| O | O79  | 1.0 | 0.35438 | 0.47826 | 0.50343 | 1.0000 |
| O | O80  | 1.0 | 0.23960 | 0.51930 | 0.42094 | 1.0000 |
| O | O81  | 1.0 | 0.44837 | 0.49162 | 0.41606 | 1.0000 |
| O | O82  | 1.0 | 0.68105 | 0.34829 | 0.43421 | 1.0000 |
| O | O83  | 1.0 | 0.83761 | 0.20587 | 0.42240 | 1.0000 |
| O | O84  | 1.0 | 0.64591 | 0.16589 | 0.38859 | 1.0000 |
| O | O85  | 1.0 | 0.83742 | 0.49241 | 0.43256 | 1.0000 |
| O | O86  | 1.0 | 0.64899 | 0.54506 | 0.40223 | 1.0000 |
| O | O87  | 1.0 | 0.99274 | 0.34821 | 0.43982 | 1.0000 |
| O | O88  | 1.0 | 0.03421 | 0.16745 | 0.39537 | 1.0000 |
| O | O89  | 1.0 | 0.03141 | 0.54164 | 0.40846 | 1.0000 |
| O | O90  | 1.0 | 0.67014 | 0.36669 | 0.69961 | 1.0000 |
| O | O91  | 1.0 | 0.83247 | 0.33035 | 0.76337 | 1.0000 |
| O | O92  | 1.0 | 0.84152 | 0.25540 | 0.66945 | 1.0000 |
| O | O93  | 1.0 | 0.49087 | 0.31738 | 0.74695 | 1.0000 |
| O | O94  | 1.0 | 0.52923 | 0.23447 | 0.65609 | 1.0000 |
| O | O95  | 1.0 | 0.48583 | 0.44138 | 0.66828 | 1.0000 |
| O | O96  | 1.0 | 0.66633 | 0.71384 | 0.69044 | 1.0000 |
| O | O97  | 1.0 | 0.83886 | 0.83890 | 0.69821 | 1.0000 |
| O | O98  | 1.0 | 0.84671 | 0.66149 | 0.64364 | 1.0000 |
| O | O99  | 1.0 | 0.49608 | 0.83057 | 0.69778 | 1.0000 |
| O | O100 | 1.0 | 0.48271 | 0.64765 | 0.64923 | 1.0000 |
| O | O101 | 1.0 | 0.66657 | 0.96417 | 0.69679 | 1.0000 |
| O | O102 | 1.0 | 0.49166 | 0.01007 | 0.64671 | 1.0000 |
| O | O103 | 1.0 | 0.32963 | 0.62536 | 0.19394 | 1.0000 |
| O | O104 | 1.0 | 0.16101 | 0.67254 | 0.25123 | 1.0000 |
| O | O105 | 1.0 | 0.18904 | 0.77203 | 0.16382 | 1.0000 |
| O | O106 | 1.0 | 0.13138 | 0.56899 | 0.16746 | 1.0000 |



|    |      |     |         |         |         |        |
|----|------|-----|---------|---------|---------|--------|
| O  | O107 | 1.0 | 0.49915 | 0.67039 | 0.25365 | 1.0000 |
| O  | O108 | 1.0 | 0.47627 | 0.76228 | 0.16277 | 1.0000 |
| O  | O109 | 1.0 | 0.52556 | 0.55724 | 0.17392 | 1.0000 |
| O  | O110 | 1.0 | 0.32735 | 0.29510 | 0.18957 | 1.0000 |
| O  | O111 | 1.0 | 0.15803 | 0.16571 | 0.19141 | 1.0000 |
| O  | O112 | 1.0 | 0.14016 | 0.35741 | 0.15555 | 1.0000 |
| O  | O113 | 1.0 | 0.49853 | 0.17255 | 0.18957 | 1.0000 |
| O  | O114 | 1.0 | 0.50346 | 0.35764 | 0.14350 | 1.0000 |
| O  | O115 | 1.0 | 0.32973 | 0.04174 | 0.19121 | 1.0000 |
| O  | O116 | 1.0 | 0.14870 | 0.97676 | 0.14901 | 1.0000 |
| O  | O117 | 1.0 | 0.51185 | 0.98480 | 0.14760 | 1.0000 |
| O  | O118 | 1.0 | 0.01648 | 0.81713 | 0.99436 | 1.0000 |
| O  | O119 | 1.0 | 0.99393 | 0.49165 | 0.99458 | 1.0000 |
| O  | O120 | 1.0 | 0.98289 | 0.17086 | 0.49370 | 1.0000 |
| O  | O121 | 1.0 | 0.98102 | 0.50719 | 0.50552 | 1.0000 |
| O  | O122 | 1.0 | 0.16045 | 0.99533 | 0.24881 | 1.0000 |
| O  | O123 | 1.0 | 0.49843 | 0.00225 | 0.24817 | 1.0000 |
| O  | O124 | 1.0 | 0.83156 | 0.00985 | 0.75758 | 1.0000 |
| O  | O125 | 1.0 | 0.49210 | 0.00795 | 0.74844 | 1.0000 |
| O  | O126 | 1.0 | 0.85768 | 0.46335 | 0.68923 | 1.0000 |
| O  | O127 | 1.0 | 0.46606 | 0.83987 | 0.06418 | 1.0000 |
| O  | O128 | 1.0 | 0.85366 | 0.02743 | 0.65766 | 1.0000 |
| Al | Al1  | 1.0 | 0.46769 | 0.13360 | 0.62252 | 1.0000 |
| Al | Al2  | 1.0 | 0.86683 | 0.53103 | 0.62545 | 1.0000 |
| Al | Al3  | 1.0 | 0.53837 | 0.85913 | 0.12763 | 1.0000 |
| Al | Al4  | 1.0 | 0.84603 | 0.16032 | 0.62313 | 1.0000 |
| Si | Si1  | 1.0 | 0.34065 | 0.54469 | 0.06105 | 1.0000 |
| Si | Si2  | 1.0 | 0.72629 | 0.78712 | 0.06002 | 1.0000 |
| Si | Si3  | 1.0 | 0.72098 | 0.52984 | 0.05796 | 1.0000 |
| Si | Si4  | 1.0 | 0.97256 | 0.78362 | 0.05020 | 1.0000 |
| Si | Si5  | 1.0 | 0.96320 | 0.52781 | 0.05128 | 1.0000 |
| Si | Si6  | 1.0 | 0.65211 | 0.20359 | 0.54614 | 1.0000 |
| Si | Si7  | 1.0 | 0.66303 | 0.45623 | 0.55665 | 1.0000 |
| Si | Si8  | 1.0 | 0.27903 | 0.20488 | 0.55967 | 1.0000 |

|    |      |     |         |         |         |        |
|----|------|-----|---------|---------|---------|--------|
| Si | Si9  | 1.0 | 0.28925 | 0.45799 | 0.55594 | 1.0000 |
| Si | Si10 | 1.0 | 0.03458 | 0.20410 | 0.54853 | 1.0000 |
| Si | Si11 | 1.0 | 0.04456 | 0.46179 | 0.55515 | 1.0000 |
| Si | Si12 | 1.0 | 0.21384 | 0.34552 | 0.31087 | 1.0000 |
| Si | Si13 | 1.0 | 0.46560 | 0.35495 | 0.30352 | 1.0000 |
| Si | Si14 | 1.0 | 0.20193 | 0.71771 | 0.30558 | 1.0000 |
| Si | Si15 | 1.0 | 0.45951 | 0.72018 | 0.30677 | 1.0000 |
| Si | Si16 | 1.0 | 0.20040 | 0.95712 | 0.30437 | 1.0000 |
| Si | Si17 | 1.0 | 0.45898 | 0.96126 | 0.30328 | 1.0000 |
| Si | Si18 | 1.0 | 0.14427 | 0.53285 | 0.37968 | 1.0000 |
| Si | Si19 | 1.0 | 0.79820 | 0.64992 | 0.80298 | 1.0000 |
| Si | Si20 | 1.0 | 0.54527 | 0.65460 | 0.80722 | 1.0000 |
| Si | Si21 | 1.0 | 0.78085 | 0.28300 | 0.81528 | 1.0000 |
| Si | Si22 | 1.0 | 0.52418 | 0.28120 | 0.80331 | 1.0000 |
| Si | Si23 | 1.0 | 0.78423 | 0.04302 | 0.81306 | 1.0000 |
| Si | Si24 | 1.0 | 0.52620 | 0.04337 | 0.80501 | 1.0000 |
| Si | Si25 | 1.0 | 0.85889 | 0.47449 | 0.87677 | 1.0000 |
| Si | Si26 | 1.0 | 0.65696 | 0.78705 | 0.94819 | 1.0000 |
| Si | Si27 | 1.0 | 0.66541 | 0.53637 | 0.94540 | 1.0000 |
| Si | Si28 | 1.0 | 0.28945 | 0.77858 | 0.93553 | 1.0000 |
| Si | Si29 | 1.0 | 0.28850 | 0.52404 | 0.94753 | 1.0000 |
| Si | Si30 | 1.0 | 0.04798 | 0.78029 | 0.93760 | 1.0000 |
| Si | Si31 | 1.0 | 0.04634 | 0.52402 | 0.94103 | 1.0000 |
| Si | Si32 | 1.0 | 0.48294 | 0.85249 | 0.87232 | 1.0000 |
| Si | Si33 | 1.0 | 0.33714 | 0.20248 | 0.44656 | 1.0000 |
| Si | Si34 | 1.0 | 0.33970 | 0.45460 | 0.44368 | 1.0000 |
| Si | Si35 | 1.0 | 0.71231 | 0.22353 | 0.43367 | 1.0000 |
| Si | Si36 | 1.0 | 0.71202 | 0.47311 | 0.44319 | 1.0000 |
| Si | Si37 | 1.0 | 0.96176 | 0.22266 | 0.43836 | 1.0000 |
| Si | Si38 | 1.0 | 0.96026 | 0.47191 | 0.44742 | 1.0000 |
| Si | Si39 | 1.0 | 0.52213 | 0.15237 | 0.37132 | 1.0000 |
| Si | Si40 | 1.0 | 0.54311 | 0.33686 | 0.69105 | 1.0000 |
| Si | Si41 | 1.0 | 0.79530 | 0.71600 | 0.69158 | 1.0000 |
| Si | Si42 | 1.0 | 0.53713 | 0.70977 | 0.69601 | 1.0000 |

|    |      |     |         |         |         |        |
|----|------|-----|---------|---------|---------|--------|
| Si | Si43 | 1.0 | 0.53465 | 0.95416 | 0.69622 | 1.0000 |
| Si | Si44 | 1.0 | 0.20486 | 0.66050 | 0.19403 | 1.0000 |
| Si | Si45 | 1.0 | 0.45774 | 0.65686 | 0.19558 | 1.0000 |
| Si | Si46 | 1.0 | 0.19971 | 0.28735 | 0.19806 | 1.0000 |
| Si | Si47 | 1.0 | 0.45657 | 0.29296 | 0.19197 | 1.0000 |
| Si | Si48 | 1.0 | 0.20113 | 0.04495 | 0.19540 | 1.0000 |
| Si | Si49 | 1.0 | 0.46009 | 0.04863 | 0.19333 | 1.0000 |
| Si | Si50 | 1.0 | 0.14237 | 0.47147 | 0.12789 | 1.0000 |
| Si | Si51 | 1.0 | 0.16022 | 0.86207 | 0.12239 | 1.0000 |
| Si | Si52 | 1.0 | 0.53513 | 0.47750 | 0.12641 | 1.0000 |
| Si | Si53 | 1.0 | 0.47154 | 0.52991 | 0.62421 | 1.0000 |
| Si | Si54 | 1.0 | 0.15404 | 0.14149 | 0.37692 | 1.0000 |
| Si | Si55 | 1.0 | 0.53377 | 0.53433 | 0.37462 | 1.0000 |
| Si | Si56 | 1.0 | 0.85026 | 0.84382 | 0.87532 | 1.0000 |
| Si | Si57 | 1.0 | 0.47467 | 0.46575 | 0.87684 | 1.0000 |
| Si | Si58 | 1.0 | 0.79663 | 0.34598 | 0.70455 | 1.0000 |
| Si | Si59 | 1.0 | 0.34057 | 0.79907 | 0.04881 | 1.0000 |
| Si | Si60 | 1.0 | 0.79229 | 0.95689 | 0.70495 | 1.0000 |

AlSiAl-T7T7T9T9

#=====

# CRYSTAL DATA

#-----

data\_VESTA\_phase\_1

|                           |             |  |  |  |  |
|---------------------------|-------------|--|--|--|--|
| _chemical_name_common     | '18T7T7T9-3 |  |  |  |  |
| _cell_length_a            | 12.537343   |  |  |  |  |
| _cell_length_b            | 12.501813   |  |  |  |  |
| _cell_length_c            | 26.238811   |  |  |  |  |
| _cell_angle_alpha         | 90.040115   |  |  |  |  |
| _cell_angle_beta          | 91.547363   |  |  |  |  |
| _cell_angle_gamma         | 89.568214   |  |  |  |  |
| _cell_volume              | 4111.041693 |  |  |  |  |
| _space_group_name_H-M_alt | 'P 1'       |  |  |  |  |
| _space_group_IT_number    | 1           |  |  |  |  |

loop\_

\_space\_group\_symop\_operation\_xyz

'x, y, z'

loop\_

\_atom\_site\_label

\_atom\_site\_occupancy

\_atom\_site\_fract\_x

\_atom\_site\_fract\_y

\_atom\_site\_fract\_z

\_atom\_site\_adp\_type

\_atom\_site\_U\_iso\_or\_equiv

\_atom\_site\_type\_symbol

|    |     |          |          |          |      |     |
|----|-----|----------|----------|----------|------|-----|
| H1 | 1.0 | 0.498164 | 0.153744 | 0.534960 | Uiso | ? H |
| H2 | 1.0 | 0.861534 | 0.524221 | 0.722344 | Uiso | ? H |
| H3 | 1.0 | 0.073344 | 0.975749 | 0.358140 | Uiso | ? H |

|     |     |          |          |           |      |     |
|-----|-----|----------|----------|-----------|------|-----|
| H4  | 1.0 | 0.861723 | 0.968176 | 0.679698  | Uiso | ? H |
| O1  | 1.0 | 0.314449 | 0.653612 | 0.059594  | Uiso | ? O |
| O2  | 1.0 | 0.333772 | 0.815777 | -0.005220 | Uiso | ? O |
| O3  | 1.0 | 0.225350 | 0.840728 | 0.079210  | Uiso | ? O |
| O4  | 1.0 | 0.436122 | 0.821576 | 0.082961  | Uiso | ? O |
| O5  | 1.0 | 0.330204 | 0.499560 | 0.988775  | Uiso | ? O |
| O6  | 1.0 | 0.220965 | 0.465668 | 0.070668  | Uiso | ? O |
| O7  | 1.0 | 0.433732 | 0.480241 | 0.076683  | Uiso | ? O |
| O8  | 1.0 | 0.690123 | 0.676951 | 0.064612  | Uiso | ? O |
| O9  | 1.0 | 0.826819 | 0.838987 | 0.061977  | Uiso | ? O |
| O10 | 1.0 | 0.638636 | 0.867124 | 0.099565  | Uiso | ? O |
| O11 | 1.0 | 0.822928 | 0.510394 | 0.058617  | Uiso | ? O |
| O12 | 1.0 | 0.638999 | 0.489012 | 0.102982  | Uiso | ? O |
| O13 | 1.0 | 0.960942 | 0.672088 | 0.056732  | Uiso | ? O |
| O14 | 1.0 | 0.019968 | 0.856930 | 0.097594  | Uiso | ? O |
| O15 | 1.0 | 0.017321 | 0.485342 | 0.096059  | Uiso | ? O |
| O16 | 1.0 | 0.670668 | 0.324658 | 0.554131  | Uiso | ? O |
| O17 | 1.0 | 0.696457 | 0.159321 | 0.491137  | Uiso | ? O |
| O18 | 1.0 | 0.757252 | 0.139551 | 0.590472  | Uiso | ? O |
| O19 | 1.0 | 0.555141 | 0.149884 | 0.562406  | Uiso | ? O |
| O20 | 1.0 | 0.700530 | 0.500478 | 0.501436  | Uiso | ? O |
| O21 | 1.0 | 0.773786 | 0.485905 | 0.597653  | Uiso | ? O |
| O22 | 1.0 | 0.565615 | 0.504831 | 0.576507  | Uiso | ? O |
| O23 | 1.0 | 0.298360 | 0.323133 | 0.571971  | Uiso | ? O |
| O24 | 1.0 | 0.176514 | 0.151394 | 0.554913  | Uiso | ? O |
| O25 | 1.0 | 0.361889 | 0.134648 | 0.608923  | Uiso | ? O |
| O26 | 1.0 | 0.176624 | 0.493632 | 0.553583  | Uiso | ? O |
| O27 | 1.0 | 0.362320 | 0.513547 | 0.602681  | Uiso | ? O |
| O28 | 1.0 | 0.051993 | 0.322957 | 0.560008  | Uiso | ? O |
| O29 | 1.0 | 0.986706 | 0.141254 | 0.599622  | Uiso | ? O |
| O30 | 1.0 | 0.004322 | 0.503578 | 0.609078  | Uiso | ? O |
| O31 | 1.0 | 0.345319 | 0.372452 | 0.314195  | Uiso | ? O |
| O32 | 1.0 | 0.184203 | 0.348220 | 0.247967  | Uiso | ? O |
| O33 | 1.0 | 0.203627 | 0.214938 | 0.326643  | Uiso | ? O |

|     |     |          |          |          |      |     |
|-----|-----|----------|----------|----------|------|-----|
| O34 | 1.0 | 0.148209 | 0.420259 | 0.340332 | Uiso | ? O |
| O35 | 1.0 | 0.494283 | 0.337364 | 0.244991 | Uiso | ? O |
| O36 | 1.0 | 0.498097 | 0.224974 | 0.329925 | Uiso | ? O |
| O37 | 1.0 | 0.544849 | 0.434118 | 0.330358 | Uiso | ? O |
| O38 | 1.0 | 0.330528 | 0.702068 | 0.311213 | Uiso | ? O |
| O39 | 1.0 | 0.157080 | 0.819767 | 0.302355 | Uiso | ? O |
| O40 | 1.0 | 0.148201 | 0.632776 | 0.346790 | Uiso | ? O |
| O41 | 1.0 | 0.497426 | 0.829071 | 0.316175 | Uiso | ? O |
| O42 | 1.0 | 0.507439 | 0.636795 | 0.356483 | Uiso | ? O |
| O43 | 1.0 | 0.326126 | 0.956406 | 0.308652 | Uiso | ? O |
| O44 | 1.0 | 0.505477 | 0.022333 | 0.355051 | Uiso | ? O |
| O45 | 1.0 | 0.648216 | 0.673730 | 0.807454 | Uiso | ? O |
| O46 | 1.0 | 0.821010 | 0.657195 | 0.747967 | Uiso | ? O |
| O47 | 1.0 | 0.839347 | 0.724957 | 0.844366 | Uiso | ? O |
| O48 | 1.0 | 0.797689 | 0.523808 | 0.824065 | Uiso | ? O |
| O49 | 1.0 | 0.491405 | 0.675624 | 0.736771 | Uiso | ? O |
| O50 | 1.0 | 0.471424 | 0.783055 | 0.822746 | Uiso | ? O |
| O51 | 1.0 | 0.464738 | 0.570489 | 0.821966 | Uiso | ? O |
| O52 | 1.0 | 0.665866 | 0.280266 | 0.810643 | Uiso | ? O |
| O53 | 1.0 | 0.827424 | 0.143254 | 0.817385 | Uiso | ? O |
| O54 | 1.0 | 0.840730 | 0.332281 | 0.863420 | Uiso | ? O |
| O55 | 1.0 | 0.484562 | 0.175243 | 0.812644 | Uiso | ? O |
| O56 | 1.0 | 0.492488 | 0.368020 | 0.849757 | Uiso | ? O |
| O57 | 1.0 | 0.645415 | 0.034720 | 0.829106 | Uiso | ? O |
| O58 | 1.0 | 0.832624 | 0.931740 | 0.824027 | Uiso | ? O |
| O59 | 1.0 | 0.452081 | 0.985061 | 0.852567 | Uiso | ? O |
| O60 | 1.0 | 0.677114 | 0.674032 | 0.936838 | Uiso | ? O |
| O61 | 1.0 | 0.656997 | 0.839203 | 0.999631 | Uiso | ? O |
| O62 | 1.0 | 0.752383 | 0.861139 | 0.910565 | Uiso | ? O |
| O63 | 1.0 | 0.542511 | 0.837144 | 0.915111 | Uiso | ? O |
| O64 | 1.0 | 0.640986 | 0.516363 | 0.003099 | Uiso | ? O |
| O65 | 1.0 | 0.745521 | 0.478361 | 0.919515 | Uiso | ? O |
| O66 | 1.0 | 0.535305 | 0.523553 | 0.915632 | Uiso | ? O |
| O67 | 1.0 | 0.272312 | 0.663109 | 0.930112 | Uiso | ? O |

|      |     |          |          |          |      |     |
|------|-----|----------|----------|----------|------|-----|
| O68  | 1.0 | 0.153713 | 0.840105 | 0.939896 | Uiso | ? O |
| O69  | 1.0 | 0.335426 | 0.845639 | 0.894336 | Uiso | ? O |
| O70  | 1.0 | 0.147284 | 0.495603 | 0.932875 | Uiso | ? O |
| O71  | 1.0 | 0.335589 | 0.480828 | 0.888650 | Uiso | ? O |
| O72  | 1.0 | 0.025219 | 0.672461 | 0.938883 | Uiso | ? O |
| O73  | 1.0 | 0.962020 | 0.857417 | 0.897068 | Uiso | ? O |
| O74  | 1.0 | 0.950875 | 0.497421 | 0.895735 | Uiso | ? O |
| O75  | 1.0 | 0.321687 | 0.318980 | 0.437009 | Uiso | ? O |
| O76  | 1.0 | 0.367210 | 0.172637 | 0.510729 | Uiso | ? O |
| O77  | 1.0 | 0.265067 | 0.117952 | 0.423146 | Uiso | ? O |
| O78  | 1.0 | 0.471762 | 0.168900 | 0.427530 | Uiso | ? O |
| O79  | 1.0 | 0.357277 | 0.472106 | 0.504697 | Uiso | ? O |
| O80  | 1.0 | 0.256229 | 0.516920 | 0.416120 | Uiso | ? O |
| O81  | 1.0 | 0.462334 | 0.475551 | 0.420233 | Uiso | ? O |
| O82  | 1.0 | 0.687809 | 0.336696 | 0.435827 | Uiso | ? O |
| O83  | 1.0 | 0.849403 | 0.198520 | 0.426193 | Uiso | ? O |
| O84  | 1.0 | 0.660016 | 0.149490 | 0.389898 | Uiso | ? O |
| O85  | 1.0 | 0.849598 | 0.473198 | 0.431087 | Uiso | ? O |
| O86  | 1.0 | 0.659715 | 0.533914 | 0.402901 | Uiso | ? O |
| O87  | 1.0 | 0.011250 | 0.333260 | 0.442175 | Uiso | ? O |
| O88  | 1.0 | 0.039821 | 0.144178 | 0.400049 | Uiso | ? O |
| O89  | 1.0 | 0.044180 | 0.529342 | 0.412362 | Uiso | ? O |
| O90  | 1.0 | 0.686201 | 0.371297 | 0.703549 | Uiso | ? O |
| O91  | 1.0 | 0.849289 | 0.318321 | 0.763274 | Uiso | ? O |
| O92  | 1.0 | 0.857578 | 0.269580 | 0.663831 | Uiso | ? O |
| O93  | 1.0 | 0.504535 | 0.340714 | 0.749313 | Uiso | ? O |
| O94  | 1.0 | 0.527344 | 0.272046 | 0.653218 | Uiso | ? O |
| O95  | 1.0 | 0.514524 | 0.478526 | 0.674345 | Uiso | ? O |
| O96  | 1.0 | 0.667968 | 0.705302 | 0.684019 | Uiso | ? O |
| O97  | 1.0 | 0.822909 | 0.851384 | 0.694757 | Uiso | ? O |
| O98  | 1.0 | 0.864071 | 0.667205 | 0.650599 | Uiso | ? O |
| O99  | 1.0 | 0.515111 | 0.850632 | 0.683360 | Uiso | ? O |
| O100 | 1.0 | 0.487358 | 0.666841 | 0.634296 | Uiso | ? O |
| O101 | 1.0 | 0.686170 | 0.936462 | 0.730182 | Uiso | ? O |

|      |     |           |           |           |      |      |
|------|-----|-----------|-----------|-----------|------|------|
| O102 | 1.0 | 0.559874  | 0.050917  | 0.659865  | Uiso | ? O  |
| O103 | 1.0 | 0.338197  | 0.688365  | 0.186864  | Uiso | ? O  |
| O104 | 1.0 | 0.174987  | 0.643625  | 0.246810  | Uiso | ? O  |
| O105 | 1.0 | 0.152199  | 0.778754  | 0.169416  | Uiso | ? O  |
| O106 | 1.0 | 0.173405  | 0.569305  | 0.153991  | Uiso | ? O  |
| O107 | 1.0 | 0.497454  | 0.657010  | 0.255396  | Uiso | ? O  |
| O108 | 1.0 | 0.532767  | 0.756365  | 0.168758  | Uiso | ? O  |
| O109 | 1.0 | 0.492240  | 0.547405  | 0.169695  | Uiso | ? O  |
| O110 | 1.0 | 0.331921  | 0.290757  | 0.181459  | Uiso | ? O  |
| O111 | 1.0 | 0.158728  | 0.171618  | 0.191118  | Uiso | ? O  |
| O112 | 1.0 | 0.142081  | 0.359174  | 0.148901  | Uiso | ? O  |
| O113 | 1.0 | 0.500712  | 0.159393  | 0.189701  | Uiso | ? O  |
| O114 | 1.0 | 0.518665  | 0.345051  | 0.145057  | Uiso | ? O  |
| O115 | 1.0 | 0.327288  | 0.040374  | 0.196208  | Uiso | ? O  |
| O116 | 1.0 | 0.151939  | 0.984499  | 0.145079  | Uiso | ? O  |
| O117 | 1.0 | 0.498155  | 0.964391  | 0.153380  | Uiso | ? O  |
| O118 | 1.0 | -0.016240 | 0.840981  | -0.002780 | Uiso | ? O  |
| O119 | 1.0 | 0.985196  | 0.503731  | 0.996026  | Uiso | ? O  |
| O120 | 1.0 | -0.003397 | 0.160355  | 0.499473  | Uiso | ? O  |
| O121 | 1.0 | 0.986792  | 0.493985  | 0.508192  | Uiso | ? O  |
| O122 | 1.0 | 0.155615  | 0.994952  | 0.246479  | Uiso | ? O  |
| O123 | 1.0 | 0.497264  | -0.004750 | 0.253992  | Uiso | ? O  |
| O124 | 1.0 | 0.735889  | 0.035092  | 0.740843  | Uiso | ? O  |
| O125 | 1.0 | 0.498446  | 0.002426  | 0.754585  | Uiso | ? O  |
| O126 | 1.0 | 0.871728  | 0.469367  | 0.695468  | Uiso | ? O  |
| O127 | 1.0 | 0.142281  | 0.002409  | 0.347486  | Uiso | ? O  |
| O128 | 1.0 | 0.881352  | 0.045650  | 0.679847  | Uiso | ? O  |
| Al1  | 1.0 | 0.494868  | 0.151661  | 0.626192  | Uiso | ? Al |
| Al2  | 1.0 | 0.881394  | 0.535662  | 0.631251  | Uiso | ? Al |
| Al3  | 1.0 | 0.166244  | 0.136954  | 0.377249  | Uiso | ? Al |
| Al4  | 1.0 | 0.868198  | 0.146922  | 0.632329  | Uiso | ? Al |
| Si1  | 1.0 | 0.327713  | 0.782548  | 0.054464  | Uiso | ? Si |
| Si2  | 1.0 | 0.325482  | 0.525310  | 0.049277  | Uiso | ? Si |
| Si3  | 1.0 | 0.703202  | 0.804688  | 0.055925  | Uiso | ? Si |



|      |     |          |          |          |      |      |
|------|-----|----------|----------|----------|------|------|
| Si4  | 1.0 | 0.698994 | 0.548355 | 0.057249 | Uiso | ? Si |
| Si5  | 1.0 | 0.948278 | 0.801182 | 0.053139 | Uiso | ? Si |
| Si6  | 1.0 | 0.946337 | 0.543519 | 0.051627 | Uiso | ? Si |
| Si7  | 1.0 | 0.525078 | 0.851748 | 0.126592 | Uiso | ? Si |
| Si8  | 1.0 | 0.679661 | 0.195815 | 0.549890 | Uiso | ? Si |
| Si9  | 1.0 | 0.679497 | 0.454709 | 0.558566 | Uiso | ? Si |
| Si10 | 1.0 | 0.297356 | 0.194152 | 0.563355 | Uiso | ? Si |
| Si11 | 1.0 | 0.297883 | 0.449363 | 0.558123 | Uiso | ? Si |
| Si12 | 1.0 | 0.052212 | 0.193136 | 0.554441 | Uiso | ? Si |
| Si13 | 1.0 | 0.054171 | 0.452948 | 0.559058 | Uiso | ? Si |
| Si14 | 1.0 | 0.219875 | 0.335992 | 0.308201 | Uiso | ? Si |
| Si15 | 1.0 | 0.470005 | 0.341587 | 0.305426 | Uiso | ? Si |
| Si16 | 1.0 | 0.203279 | 0.697139 | 0.302002 | Uiso | ? Si |
| Si17 | 1.0 | 0.459204 | 0.705837 | 0.309631 | Uiso | ? Si |
| Si18 | 1.0 | 0.457161 | 0.951547 | 0.308582 | Uiso | ? Si |
| Si19 | 1.0 | 0.150234 | 0.521775 | 0.379149 | Uiso | ? Si |
| Si20 | 1.0 | 0.774891 | 0.646427 | 0.805235 | Uiso | ? Si |
| Si21 | 1.0 | 0.518983 | 0.674751 | 0.797232 | Uiso | ? Si |
| Si22 | 1.0 | 0.794685 | 0.270230 | 0.813269 | Uiso | ? Si |
| Si23 | 1.0 | 0.537010 | 0.292780 | 0.804722 | Uiso | ? Si |
| Si24 | 1.0 | 0.763991 | 0.034220 | 0.806299 | Uiso | ? Si |
| Si25 | 1.0 | 0.519262 | 0.050932 | 0.811730 | Uiso | ? Si |
| Si26 | 1.0 | 0.833913 | 0.459549 | 0.876284 | Uiso | ? Si |
| Si27 | 1.0 | 0.656508 | 0.802596 | 0.940333 | Uiso | ? Si |
| Si28 | 1.0 | 0.649095 | 0.547777 | 0.943398 | Uiso | ? Si |
| Si29 | 1.0 | 0.273639 | 0.790566 | 0.940346 | Uiso | ? Si |
| Si30 | 1.0 | 0.270954 | 0.534089 | 0.935242 | Uiso | ? Si |
| Si31 | 1.0 | 0.031199 | 0.801709 | 0.943340 | Uiso | ? Si |
| Si32 | 1.0 | 0.027727 | 0.542793 | 0.941131 | Uiso | ? Si |
| Si33 | 1.0 | 0.451980 | 0.861076 | 0.871161 | Uiso | ? Si |
| Si34 | 1.0 | 0.353188 | 0.193672 | 0.449010 | Uiso | ? Si |
| Si35 | 1.0 | 0.349026 | 0.445613 | 0.444416 | Uiso | ? Si |
| Si36 | 1.0 | 0.724111 | 0.211415 | 0.436100 | Uiso | ? Si |
| Si37 | 1.0 | 0.725298 | 0.460441 | 0.444194 | Uiso | ? Si |

|      |     |          |          |          |      |      |
|------|-----|----------|----------|----------|------|------|
| Si38 | 1.0 | 0.974914 | 0.207780 | 0.442293 | Uiso | ? Si |
| Si39 | 1.0 | 0.972700 | 0.456637 | 0.449237 | Uiso | ? Si |
| Si40 | 1.0 | 0.533427 | 0.142390 | 0.375300 | Uiso | ? Si |
| Si41 | 1.0 | 0.557531 | 0.362158 | 0.693699 | Uiso | ? Si |
| Si42 | 1.0 | 0.795110 | 0.724695 | 0.693145 | Uiso | ? Si |
| Si43 | 1.0 | 0.540401 | 0.722532 | 0.684384 | Uiso | ? Si |
| Si44 | 1.0 | 0.556624 | 0.964627 | 0.702943 | Uiso | ? Si |
| Si45 | 1.0 | 0.209978 | 0.668757 | 0.188861 | Uiso | ? Si |
| Si46 | 1.0 | 0.465152 | 0.661737 | 0.195139 | Uiso | ? Si |
| Si47 | 1.0 | 0.205177 | 0.292778 | 0.193316 | Uiso | ? Si |
| Si48 | 1.0 | 0.460499 | 0.283154 | 0.190878 | Uiso | ? Si |
| Si49 | 1.0 | 0.198781 | 0.048851 | 0.194223 | Uiso | ? Si |
| Si50 | 1.0 | 0.456303 | 0.039897 | 0.198574 | Uiso | ? Si |
| Si51 | 1.0 | 0.138756 | 0.470118 | 0.117609 | Uiso | ? Si |
| Si52 | 1.0 | 0.138656 | 0.864183 | 0.122806 | Uiso | ? Si |
| Si53 | 1.0 | 0.520319 | 0.466386 | 0.123438 | Uiso | ? Si |
| Si54 | 1.0 | 0.483928 | 0.538631 | 0.620788 | Uiso | ? Si |
| Si55 | 1.0 | 0.542016 | 0.519310 | 0.377427 | Uiso | ? Si |
| Si56 | 1.0 | 0.845896 | 0.843078 | 0.869518 | Uiso | ? Si |
| Si57 | 1.0 | 0.457180 | 0.485776 | 0.868596 | Uiso | ? Si |
| Si58 | 1.0 | 0.813128 | 0.348718 | 0.704885 | Uiso | ? Si |
| Si59 | 1.0 | 0.200473 | 0.940125 | 0.298314 | Uiso | ? Si |

T1T7T7T7T7:

data\_image0

\_chemical\_formula\_structural H5O128Al5Si59  
\_chemical\_formula\_sum "H5 O128 Al5 Si59"  
\_cell\_length\_a 12.5388  
\_cell\_length\_b 12.5507  
\_cell\_length\_c 26.4417  
\_cell\_angle\_alpha 89.8792  
\_cell\_angle\_beta 89.9276  
\_cell\_angle\_gamma 91.0103

\_space\_group\_name\_H-M\_alt "P 1"  
\_space\_group\_IT\_number 1

loop\_

\_space\_group\_symop\_operation\_xyz  
'x, y, z'

loop\_

\_atom\_site\_type\_symbol  
\_atom\_site\_label  
\_atom\_site\_symmetry\_multiplicity  
\_atom\_site\_fract\_x  
\_atom\_site\_fract\_y  
\_atom\_site\_fract\_z  
\_atom\_site\_occupancy  
H H1 1.0 0.47893 0.14076 0.53288 1.0000  
H H2 1.0 0.85965 0.51665 0.71693 1.0000  
H H3 1.0 0.52013 0.86151 0.03291 1.0000  
H H4 1.0 0.12802 0.82433 0.36097 1.0000  
H H5 1.0 0.13835 0.48349 0.21708 1.0000  
O O1 1.0 0.37345 0.66924 0.05050 1.0000  
O O2 1.0 0.32596 0.83116 0.98915 1.0000  
O O3 1.0 0.26162 0.83493 0.08589 1.0000

|   |     |     |         |         |         |        |
|---|-----|-----|---------|---------|---------|--------|
| O | O4  | 1.0 | 0.31111 | 0.48805 | 0.00575 | 1.0000 |
| O | O5  | 1.0 | 0.23847 | 0.53778 | 0.09710 | 1.0000 |
| O | O6  | 1.0 | 0.44211 | 0.48244 | 0.08140 | 1.0000 |
| O | O7  | 1.0 | 0.71956 | 0.66107 | 0.05924 | 1.0000 |
| O | O8  | 1.0 | 0.84964 | 0.83138 | 0.05467 | 1.0000 |
| O | O9  | 1.0 | 0.66672 | 0.83984 | 0.10599 | 1.0000 |
| O | O10 | 1.0 | 0.83336 | 0.48713 | 0.05254 | 1.0000 |
| O | O11 | 1.0 | 0.64927 | 0.47926 | 0.10024 | 1.0000 |
| O | O12 | 1.0 | 0.96583 | 0.65771 | 0.05233 | 1.0000 |
| O | O13 | 1.0 | 0.04850 | 0.83487 | 0.09185 | 1.0000 |
| O | O14 | 1.0 | 0.01459 | 0.48080 | 0.10092 | 1.0000 |
| O | O15 | 1.0 | 0.62821 | 0.33244 | 0.55159 | 1.0000 |
| O | O16 | 1.0 | 0.67490 | 0.17192 | 0.49002 | 1.0000 |
| O | O17 | 1.0 | 0.73640 | 0.16297 | 0.58719 | 1.0000 |
| O | O18 | 1.0 | 0.53268 | 0.14157 | 0.56061 | 1.0000 |
| O | O19 | 1.0 | 0.68262 | 0.51550 | 0.50511 | 1.0000 |
| O | O20 | 1.0 | 0.76550 | 0.46523 | 0.59449 | 1.0000 |
| O | O21 | 1.0 | 0.55957 | 0.51843 | 0.58356 | 1.0000 |
| O | O22 | 1.0 | 0.28049 | 0.33466 | 0.56003 | 1.0000 |
| O | O23 | 1.0 | 0.14860 | 0.16650 | 0.55302 | 1.0000 |
| O | O24 | 1.0 | 0.32966 | 0.15381 | 0.60571 | 1.0000 |
| O | O25 | 1.0 | 0.16875 | 0.50980 | 0.55254 | 1.0000 |
| O | O26 | 1.0 | 0.35148 | 0.51616 | 0.60134 | 1.0000 |
| O | O27 | 1.0 | 0.03340 | 0.34155 | 0.55280 | 1.0000 |
| O | O28 | 1.0 | 0.95033 | 0.16235 | 0.59116 | 1.0000 |
| O | O29 | 1.0 | 0.98912 | 0.51810 | 0.60291 | 1.0000 |
| O | O30 | 1.0 | 0.33031 | 0.37892 | 0.31009 | 1.0000 |
| O | O31 | 1.0 | 0.17114 | 0.34119 | 0.24349 | 1.0000 |
| O | O32 | 1.0 | 0.18497 | 0.22491 | 0.32762 | 1.0000 |
| O | O33 | 1.0 | 0.13304 | 0.43205 | 0.33058 | 1.0000 |
| O | O34 | 1.0 | 0.49703 | 0.34790 | 0.24938 | 1.0000 |
| O | O35 | 1.0 | 0.46419 | 0.22377 | 0.33057 | 1.0000 |
| O | O36 | 1.0 | 0.52896 | 0.42528 | 0.33985 | 1.0000 |
| O | O37 | 1.0 | 0.35147 | 0.72191 | 0.30730 | 1.0000 |

|   |     |     |         |         |         |        |
|---|-----|-----|---------|---------|---------|--------|
| O | O38 | 1.0 | 0.19516 | 0.62620 | 0.35903 | 1.0000 |
| O | O39 | 1.0 | 0.52751 | 0.83795 | 0.31673 | 1.0000 |
| O | O40 | 1.0 | 0.52971 | 0.63769 | 0.34187 | 1.0000 |
| O | O41 | 1.0 | 0.35661 | 0.96445 | 0.31673 | 1.0000 |
| O | O42 | 1.0 | 0.15649 | 0.02901 | 0.36095 | 1.0000 |
| O | O43 | 1.0 | 0.54580 | 0.03330 | 0.34677 | 1.0000 |
| O | O44 | 1.0 | 0.66821 | 0.62124 | 0.81004 | 1.0000 |
| O | O45 | 1.0 | 0.82602 | 0.65690 | 0.74225 | 1.0000 |
| O | O46 | 1.0 | 0.82137 | 0.76585 | 0.82810 | 1.0000 |
| O | O47 | 1.0 | 0.86346 | 0.55625 | 0.82653 | 1.0000 |
| O | O48 | 1.0 | 0.50272 | 0.65253 | 0.74940 | 1.0000 |
| O | O49 | 1.0 | 0.53388 | 0.77567 | 0.83069 | 1.0000 |
| O | O50 | 1.0 | 0.46950 | 0.57440 | 0.84006 | 1.0000 |
| O | O51 | 1.0 | 0.65132 | 0.29420 | 0.80816 | 1.0000 |
| O | O52 | 1.0 | 0.81398 | 0.16381 | 0.82601 | 1.0000 |
| O | O53 | 1.0 | 0.81720 | 0.36023 | 0.85905 | 1.0000 |
| O | O54 | 1.0 | 0.48747 | 0.16247 | 0.81894 | 1.0000 |
| O | O55 | 1.0 | 0.46479 | 0.36198 | 0.84153 | 1.0000 |
| O | O56 | 1.0 | 0.65233 | 0.02652 | 0.81309 | 1.0000 |
| O | O57 | 1.0 | 0.83624 | 0.96691 | 0.85344 | 1.0000 |
| O | O58 | 1.0 | 0.46385 | 0.96894 | 0.84816 | 1.0000 |
| O | O59 | 1.0 | 0.62749 | 0.66762 | 0.93920 | 1.0000 |
| O | O60 | 1.0 | 0.65757 | 0.82668 | 0.00696 | 1.0000 |
| O | O61 | 1.0 | 0.76956 | 0.82379 | 0.92202 | 1.0000 |
| O | O62 | 1.0 | 0.55884 | 0.86160 | 0.92209 | 1.0000 |
| O | O63 | 1.0 | 0.65482 | 0.50215 | 0.00036 | 1.0000 |
| O | O64 | 1.0 | 0.77939 | 0.53011 | 0.91865 | 1.0000 |
| O | O65 | 1.0 | 0.57768 | 0.46936 | 0.90959 | 1.0000 |
| O | O66 | 1.0 | 0.29226 | 0.64897 | 0.94258 | 1.0000 |
| O | O67 | 1.0 | 0.16701 | 0.81430 | 0.92314 | 1.0000 |
| O | O68 | 1.0 | 0.36344 | 0.81085 | 0.88980 | 1.0000 |
| O | O69 | 1.0 | 0.16495 | 0.48193 | 0.93251 | 1.0000 |
| O | O70 | 1.0 | 0.36543 | 0.46372 | 0.91034 | 1.0000 |
| O | O71 | 1.0 | 0.03305 | 0.64999 | 0.93622 | 1.0000 |

|   |      |     |         |         |         |        |
|---|------|-----|---------|---------|---------|--------|
| O | O72  | 1.0 | 0.96995 | 0.83088 | 0.89418 | 1.0000 |
| O | O73  | 1.0 | 0.97337 | 0.46360 | 0.90019 | 1.0000 |
| O | O74  | 1.0 | 0.38020 | 0.32838 | 0.44012 | 1.0000 |
| O | O75  | 1.0 | 0.34368 | 0.16980 | 0.50709 | 1.0000 |
| O | O76  | 1.0 | 0.22715 | 0.18261 | 0.42422 | 1.0000 |
| O | O77  | 1.0 | 0.43651 | 0.13156 | 0.42020 | 1.0000 |
| O | O78  | 1.0 | 0.34915 | 0.49293 | 0.50175 | 1.0000 |
| O | O79  | 1.0 | 0.22256 | 0.46130 | 0.42163 | 1.0000 |
| O | O80  | 1.0 | 0.42296 | 0.52825 | 0.41077 | 1.0000 |
| O | O81  | 1.0 | 0.71234 | 0.35508 | 0.44367 | 1.0000 |
| O | O82  | 1.0 | 0.83096 | 0.18823 | 0.42242 | 1.0000 |
| O | O83  | 1.0 | 0.63119 | 0.19650 | 0.39183 | 1.0000 |
| O | O84  | 1.0 | 0.83562 | 0.52662 | 0.43445 | 1.0000 |
| O | O85  | 1.0 | 0.63622 | 0.53684 | 0.40841 | 1.0000 |
| O | O86  | 1.0 | 0.96131 | 0.35511 | 0.43804 | 1.0000 |
| O | O87  | 1.0 | 0.02878 | 0.18054 | 0.39351 | 1.0000 |
| O | O88  | 1.0 | 0.03142 | 0.53941 | 0.40291 | 1.0000 |
| O | O89  | 1.0 | 0.66936 | 0.36471 | 0.69799 | 1.0000 |
| O | O90  | 1.0 | 0.83242 | 0.32129 | 0.75947 | 1.0000 |
| O | O91  | 1.0 | 0.83999 | 0.26019 | 0.66233 | 1.0000 |
| O | O92  | 1.0 | 0.48889 | 0.30979 | 0.74586 | 1.0000 |
| O | O93  | 1.0 | 0.52777 | 0.23879 | 0.65319 | 1.0000 |
| O | O94  | 1.0 | 0.48425 | 0.44427 | 0.67128 | 1.0000 |
| O | O95  | 1.0 | 0.66035 | 0.71750 | 0.68920 | 1.0000 |
| O | O96  | 1.0 | 0.83086 | 0.84835 | 0.69396 | 1.0000 |
| O | O97  | 1.0 | 0.84017 | 0.66538 | 0.64328 | 1.0000 |
| O | O98  | 1.0 | 0.48854 | 0.83347 | 0.69873 | 1.0000 |
| O | O99  | 1.0 | 0.47515 | 0.65022 | 0.65026 | 1.0000 |
| O | O100 | 1.0 | 0.65868 | 0.96661 | 0.69593 | 1.0000 |
| O | O101 | 1.0 | 0.83692 | 0.04705 | 0.65590 | 1.0000 |
| O | O102 | 1.0 | 0.48016 | 0.01277 | 0.64833 | 1.0000 |
| O | O103 | 1.0 | 0.33066 | 0.63164 | 0.19927 | 1.0000 |
| O | O104 | 1.0 | 0.16969 | 0.67732 | 0.26037 | 1.0000 |
| O | O105 | 1.0 | 0.16190 | 0.74234 | 0.16365 | 1.0000 |

|    |      |     |         |         |         |        |
|----|------|-----|---------|---------|---------|--------|
| O  | O106 | 1.0 | 0.51164 | 0.68623 | 0.24553 | 1.0000 |
| O  | O107 | 1.0 | 0.46638 | 0.76435 | 0.15435 | 1.0000 |
| O  | O108 | 1.0 | 0.51650 | 0.55876 | 0.16854 | 1.0000 |
| O  | O109 | 1.0 | 0.33810 | 0.28287 | 0.19099 | 1.0000 |
| O  | O110 | 1.0 | 0.16850 | 0.15065 | 0.19407 | 1.0000 |
| O  | O111 | 1.0 | 0.15989 | 0.33570 | 0.14445 | 1.0000 |
| O  | O112 | 1.0 | 0.51139 | 0.16753 | 0.19808 | 1.0000 |
| O  | O113 | 1.0 | 0.52136 | 0.35135 | 0.15014 | 1.0000 |
| O  | O114 | 1.0 | 0.34150 | 0.03438 | 0.19500 | 1.0000 |
| O  | O115 | 1.0 | 0.16462 | 0.95597 | 0.15273 | 1.0000 |
| O  | O116 | 1.0 | 0.52097 | 0.98868 | 0.14773 | 1.0000 |
| O  | O117 | 1.0 | 0.01596 | 0.82307 | 0.99320 | 1.0000 |
| O  | O118 | 1.0 | 0.01072 | 0.48596 | 0.99979 | 1.0000 |
| O  | O119 | 1.0 | 0.98099 | 0.17895 | 0.49270 | 1.0000 |
| O  | O120 | 1.0 | 0.98946 | 0.51694 | 0.50192 | 1.0000 |
| O  | O121 | 1.0 | 0.17377 | 0.97624 | 0.25191 | 1.0000 |
| O  | O122 | 1.0 | 0.51391 | 0.98792 | 0.24849 | 1.0000 |
| O  | O123 | 1.0 | 0.82459 | 0.01576 | 0.75470 | 1.0000 |
| O  | O124 | 1.0 | 0.48819 | 0.01337 | 0.74930 | 1.0000 |
| O  | O125 | 1.0 | 0.85819 | 0.46393 | 0.68899 | 1.0000 |
| O  | O126 | 1.0 | 0.46614 | 0.86036 | 0.06049 | 1.0000 |
| O  | O127 | 1.0 | 0.17730 | 0.82472 | 0.33240 | 1.0000 |
| O  | O128 | 1.0 | 0.13939 | 0.53719 | 0.18944 | 1.0000 |
| Al | Al1  | 1.0 | 0.46001 | 0.13612 | 0.62375 | 1.0000 |
| Al | Al2  | 1.0 | 0.86371 | 0.53596 | 0.62589 | 1.0000 |
| Al | Al3  | 1.0 | 0.53743 | 0.86434 | 0.12394 | 1.0000 |
| Al | Al4  | 1.0 | 0.22086 | 0.96431 | 0.31250 | 1.0000 |
| Al | Al5  | 1.0 | 0.13797 | 0.46457 | 0.12603 | 1.0000 |
| Si | Si1  | 1.0 | 0.33894 | 0.54350 | 0.05982 | 1.0000 |
| Si | Si2  | 1.0 | 0.72583 | 0.79016 | 0.05852 | 1.0000 |
| Si | Si3  | 1.0 | 0.71411 | 0.53269 | 0.05356 | 1.0000 |
| Si | Si4  | 1.0 | 0.96984 | 0.78591 | 0.04837 | 1.0000 |
| Si | Si5  | 1.0 | 0.95714 | 0.52779 | 0.05239 | 1.0000 |
| Si | Si6  | 1.0 | 0.64958 | 0.20672 | 0.54770 | 1.0000 |

|    |      |     |         |         |         |        |
|----|------|-----|---------|---------|---------|--------|
| Si | Si7  | 1.0 | 0.66146 | 0.45883 | 0.55979 | 1.0000 |
| Si | Si8  | 1.0 | 0.27283 | 0.20563 | 0.55806 | 1.0000 |
| Si | Si9  | 1.0 | 0.28751 | 0.46301 | 0.55455 | 1.0000 |
| Si | Si10 | 1.0 | 0.02871 | 0.21345 | 0.54777 | 1.0000 |
| Si | Si11 | 1.0 | 0.04425 | 0.47142 | 0.55368 | 1.0000 |
| Si | Si12 | 1.0 | 0.20554 | 0.34161 | 0.30321 | 1.0000 |
| Si | Si13 | 1.0 | 0.45553 | 0.34329 | 0.30729 | 1.0000 |
| Si | Si14 | 1.0 | 0.48180 | 0.72132 | 0.30247 | 1.0000 |
| Si | Si15 | 1.0 | 0.48218 | 0.95742 | 0.30630 | 1.0000 |
| Si | Si16 | 1.0 | 0.14603 | 0.51222 | 0.37873 | 1.0000 |
| Si | Si17 | 1.0 | 0.79409 | 0.65195 | 0.80231 | 1.0000 |
| Si | Si18 | 1.0 | 0.54321 | 0.65621 | 0.80744 | 1.0000 |
| Si | Si19 | 1.0 | 0.77856 | 0.28421 | 0.81341 | 1.0000 |
| Si | Si20 | 1.0 | 0.52303 | 0.28237 | 0.80331 | 1.0000 |
| Si | Si21 | 1.0 | 0.78107 | 0.04202 | 0.81129 | 1.0000 |
| Si | Si22 | 1.0 | 0.52431 | 0.04253 | 0.80635 | 1.0000 |
| Si | Si23 | 1.0 | 0.85667 | 0.47789 | 0.87612 | 1.0000 |
| Si | Si24 | 1.0 | 0.65500 | 0.79398 | 0.94702 | 1.0000 |
| Si | Si25 | 1.0 | 0.66004 | 0.54204 | 0.94215 | 1.0000 |
| Si | Si26 | 1.0 | 0.28656 | 0.77617 | 0.93602 | 1.0000 |
| Si | Si27 | 1.0 | 0.28388 | 0.52067 | 0.94808 | 1.0000 |
| Si | Si28 | 1.0 | 0.04525 | 0.77883 | 0.93720 | 1.0000 |
| Si | Si29 | 1.0 | 0.04502 | 0.52174 | 0.94325 | 1.0000 |
| Si | Si30 | 1.0 | 0.48040 | 0.85296 | 0.87278 | 1.0000 |
| Si | Si31 | 1.0 | 0.34527 | 0.20286 | 0.44693 | 1.0000 |
| Si | Si32 | 1.0 | 0.34380 | 0.45246 | 0.44376 | 1.0000 |
| Si | Si33 | 1.0 | 0.71236 | 0.22774 | 0.43659 | 1.0000 |
| Si | Si34 | 1.0 | 0.71627 | 0.48351 | 0.44814 | 1.0000 |
| Si | Si35 | 1.0 | 0.95182 | 0.22604 | 0.43708 | 1.0000 |
| Si | Si36 | 1.0 | 0.95440 | 0.48313 | 0.44532 | 1.0000 |
| Si | Si37 | 1.0 | 0.51909 | 0.14613 | 0.37228 | 1.0000 |
| Si | Si38 | 1.0 | 0.54133 | 0.33697 | 0.69095 | 1.0000 |
| Si | Si39 | 1.0 | 0.78956 | 0.72458 | 0.69055 | 1.0000 |
| Si | Si40 | 1.0 | 0.53201 | 0.71358 | 0.69644 | 1.0000 |



|    |      |     |         |         |         |        |
|----|------|-----|---------|---------|---------|--------|
| Si | Si41 | 1.0 | 0.78696 | 0.96913 | 0.69981 | 1.0000 |
| Si | Si42 | 1.0 | 0.52865 | 0.95734 | 0.69707 | 1.0000 |
| Si | Si43 | 1.0 | 0.45789 | 0.66282 | 0.19056 | 1.0000 |
| Si | Si44 | 1.0 | 0.20892 | 0.27419 | 0.19153 | 1.0000 |
| Si | Si45 | 1.0 | 0.46659 | 0.28674 | 0.19662 | 1.0000 |
| Si | Si46 | 1.0 | 0.21244 | 0.02882 | 0.19932 | 1.0000 |
| Si | Si47 | 1.0 | 0.47128 | 0.04336 | 0.19658 | 1.0000 |
| Si | Si48 | 1.0 | 0.15863 | 0.84318 | 0.12371 | 1.0000 |
| Si | Si49 | 1.0 | 0.53134 | 0.46895 | 0.12514 | 1.0000 |
| Si | Si50 | 1.0 | 0.84121 | 0.15765 | 0.62407 | 1.0000 |
| Si | Si51 | 1.0 | 0.46852 | 0.53115 | 0.62655 | 1.0000 |
| Si | Si52 | 1.0 | 0.14923 | 0.15175 | 0.37658 | 1.0000 |
| Si | Si53 | 1.0 | 0.52896 | 0.53075 | 0.37523 | 1.0000 |
| Si | Si54 | 1.0 | 0.84921 | 0.84671 | 0.87445 | 1.0000 |
| Si | Si55 | 1.0 | 0.47012 | 0.46818 | 0.87535 | 1.0000 |
| Si | Si56 | 1.0 | 0.79539 | 0.34580 | 0.70202 | 1.0000 |
| Si | Si57 | 1.0 | 0.35020 | 0.79469 | 0.04676 | 1.0000 |
| Si | Si58 | 1.0 | 0.22642 | 0.70586 | 0.31385 | 1.0000 |
| Si | Si59 | 1.0 | 0.20517 | 0.65372 | 0.20190 | 1.0000 |

T1T7T7T7T9:

data\_image0

\_chemical\_formula\_structural H5O128Al5Si59  
\_chemical\_formula\_sum "H5 O128 Al5 Si59"  
\_cell\_length\_a 12.5877  
\_cell\_length\_b 12.5056  
\_cell\_length\_c 26.4266  
\_cell\_angle\_alpha 89.4008  
\_cell\_angle\_beta 89.8107  
\_cell\_angle\_gamma 90.7201

\_space\_group\_name\_H-M\_alt "P 1"

\_space\_group\_IT\_number 1

loop\_

\_space\_group\_symop\_operation\_xyz

'x, y, z'

loop\_

\_atom\_site\_type\_symbol

\_atom\_site\_label

\_atom\_site\_symmetry\_multiplicity

\_atom\_site\_fract\_x

\_atom\_site\_fract\_y

\_atom\_site\_fract\_z

\_atom\_site\_occupancy

|   |    |     |         |         |         |        |
|---|----|-----|---------|---------|---------|--------|
| H | H1 | 1.0 | 0.47803 | 0.15133 | 0.53925 | 1.0000 |
| H | H2 | 1.0 | 0.85659 | 0.52627 | 0.71536 | 1.0000 |
| H | H3 | 1.0 | 0.09398 | 0.97324 | 0.37117 | 1.0000 |
| H | H4 | 1.0 | 0.17543 | 0.89137 | 0.89746 | 1.0000 |
| H | H5 | 1.0 | 0.16122 | 0.46921 | 0.21287 | 1.0000 |
| O | O1 | 1.0 | 0.37439 | 0.67160 | 0.05435 | 1.0000 |
| O | O2 | 1.0 | 0.32706 | 0.83755 | 0.99532 | 1.0000 |
| O | O3 | 1.0 | 0.23316 | 0.81782 | 0.08498 | 1.0000 |

|   |     |     |         |         |         |        |
|---|-----|-----|---------|---------|---------|--------|
| O | O4  | 1.0 | 0.43753 | 0.86948 | 0.07809 | 1.0000 |
| O | O5  | 1.0 | 0.33234 | 0.49574 | 0.00076 | 1.0000 |
| O | O6  | 1.0 | 0.22873 | 0.53373 | 0.08695 | 1.0000 |
| O | O7  | 1.0 | 0.43318 | 0.47760 | 0.08570 | 1.0000 |
| O | O8  | 1.0 | 0.70404 | 0.67362 | 0.06058 | 1.0000 |
| O | O9  | 1.0 | 0.83879 | 0.84033 | 0.05883 | 1.0000 |
| O | O10 | 1.0 | 0.64673 | 0.86038 | 0.09637 | 1.0000 |
| O | O11 | 1.0 | 0.82452 | 0.50008 | 0.06056 | 1.0000 |
| O | O12 | 1.0 | 0.63907 | 0.49522 | 0.10520 | 1.0000 |
| O | O13 | 1.0 | 0.95795 | 0.66642 | 0.06071 | 1.0000 |
| O | O14 | 1.0 | 0.02598 | 0.84633 | 0.10162 | 1.0000 |
| O | O15 | 1.0 | 0.01004 | 0.48110 | 0.10455 | 1.0000 |
| O | O16 | 1.0 | 0.64123 | 0.33416 | 0.55411 | 1.0000 |
| O | O17 | 1.0 | 0.67026 | 0.16650 | 0.49329 | 1.0000 |
| O | O18 | 1.0 | 0.74053 | 0.15954 | 0.58859 | 1.0000 |
| O | O19 | 1.0 | 0.53340 | 0.15225 | 0.56643 | 1.0000 |
| O | O20 | 1.0 | 0.69103 | 0.50957 | 0.50099 | 1.0000 |
| O | O21 | 1.0 | 0.75818 | 0.48626 | 0.59575 | 1.0000 |
| O | O22 | 1.0 | 0.55276 | 0.51871 | 0.57418 | 1.0000 |
| O | O23 | 1.0 | 0.28090 | 0.34603 | 0.55809 | 1.0000 |
| O | O24 | 1.0 | 0.15444 | 0.17239 | 0.56144 | 1.0000 |
| O | O25 | 1.0 | 0.33571 | 0.17660 | 0.61367 | 1.0000 |
| O | O26 | 1.0 | 0.16495 | 0.51796 | 0.54727 | 1.0000 |
| O | O27 | 1.0 | 0.34831 | 0.53256 | 0.59544 | 1.0000 |
| O | O28 | 1.0 | 0.03698 | 0.34375 | 0.55041 | 1.0000 |
| O | O29 | 1.0 | 0.95368 | 0.17135 | 0.59639 | 1.0000 |
| O | O30 | 1.0 | 0.98530 | 0.52003 | 0.59752 | 1.0000 |
| O | O31 | 1.0 | 0.34287 | 0.36789 | 0.30198 | 1.0000 |
| O | O32 | 1.0 | 0.18154 | 0.34022 | 0.23761 | 1.0000 |
| O | O33 | 1.0 | 0.19325 | 0.21927 | 0.32169 | 1.0000 |
| O | O34 | 1.0 | 0.14854 | 0.43020 | 0.32419 | 1.0000 |
| O | O35 | 1.0 | 0.51060 | 0.30497 | 0.24830 | 1.0000 |
| O | O36 | 1.0 | 0.46900 | 0.21622 | 0.33845 | 1.0000 |
| O | O37 | 1.0 | 0.53720 | 0.41780 | 0.33182 | 1.0000 |

|   |     |     |         |         |         |        |
|---|-----|-----|---------|---------|---------|--------|
| O | O38 | 1.0 | 0.35087 | 0.70393 | 0.30788 | 1.0000 |
| O | O39 | 1.0 | 0.17940 | 0.82041 | 0.32294 | 1.0000 |
| O | O40 | 1.0 | 0.18923 | 0.62491 | 0.35954 | 1.0000 |
| O | O41 | 1.0 | 0.51467 | 0.83356 | 0.31668 | 1.0000 |
| O | O42 | 1.0 | 0.53813 | 0.62988 | 0.33693 | 1.0000 |
| O | O43 | 1.0 | 0.34337 | 0.96110 | 0.31881 | 1.0000 |
| O | O44 | 1.0 | 0.52780 | 0.01824 | 0.35825 | 1.0000 |
| O | O45 | 1.0 | 0.67508 | 0.64751 | 0.81362 | 1.0000 |
| O | O46 | 1.0 | 0.82649 | 0.65489 | 0.74161 | 1.0000 |
| O | O47 | 1.0 | 0.84283 | 0.78011 | 0.82021 | 1.0000 |
| O | O48 | 1.0 | 0.86313 | 0.56668 | 0.83120 | 1.0000 |
| O | O49 | 1.0 | 0.52013 | 0.64596 | 0.74517 | 1.0000 |
| O | O50 | 1.0 | 0.51319 | 0.77854 | 0.82359 | 1.0000 |
| O | O51 | 1.0 | 0.48353 | 0.56975 | 0.83581 | 1.0000 |
| O | O52 | 1.0 | 0.64257 | 0.29772 | 0.81119 | 1.0000 |
| O | O53 | 1.0 | 0.80760 | 0.17080 | 0.82686 | 1.0000 |
| O | O54 | 1.0 | 0.81203 | 0.36793 | 0.85874 | 1.0000 |
| O | O55 | 1.0 | 0.47207 | 0.16988 | 0.80937 | 1.0000 |
| O | O56 | 1.0 | 0.45697 | 0.35928 | 0.84753 | 1.0000 |
| O | O57 | 1.0 | 0.64124 | 0.04226 | 0.81095 | 1.0000 |
| O | O58 | 1.0 | 0.81332 | 0.97238 | 0.85704 | 1.0000 |
| O | O59 | 1.0 | 0.45545 | 0.97565 | 0.84595 | 1.0000 |
| O | O60 | 1.0 | 0.61504 | 0.66948 | 0.94005 | 1.0000 |
| O | O61 | 1.0 | 0.66827 | 0.83610 | 0.99828 | 1.0000 |
| O | O62 | 1.0 | 0.77633 | 0.79902 | 0.91458 | 1.0000 |
| O | O63 | 1.0 | 0.57493 | 0.86685 | 0.91082 | 1.0000 |
| O | O64 | 1.0 | 0.64980 | 0.50769 | 0.00451 | 1.0000 |
| O | O65 | 1.0 | 0.76424 | 0.52833 | 0.91965 | 1.0000 |
| O | O66 | 1.0 | 0.55808 | 0.47099 | 0.91759 | 1.0000 |
| O | O67 | 1.0 | 0.27135 | 0.66063 | 0.94660 | 1.0000 |
| O | O68 | 1.0 | 0.37118 | 0.81701 | 0.89588 | 1.0000 |
| O | O69 | 1.0 | 0.15776 | 0.48255 | 0.94157 | 1.0000 |
| O | O70 | 1.0 | 0.34801 | 0.48914 | 0.90151 | 1.0000 |
| O | O71 | 1.0 | 0.03351 | 0.65478 | 0.93614 | 1.0000 |

|   |      |     |         |         |         |        |
|---|------|-----|---------|---------|---------|--------|
| O | O72  | 1.0 | 0.97339 | 0.85745 | 0.89183 | 1.0000 |
| O | O73  | 1.0 | 0.96391 | 0.46575 | 0.90628 | 1.0000 |
| O | O74  | 1.0 | 0.38398 | 0.32735 | 0.44497 | 1.0000 |
| O | O75  | 1.0 | 0.34784 | 0.17230 | 0.51456 | 1.0000 |
| O | O76  | 1.0 | 0.24528 | 0.16800 | 0.42610 | 1.0000 |
| O | O77  | 1.0 | 0.45470 | 0.13446 | 0.43268 | 1.0000 |
| O | O78  | 1.0 | 0.34558 | 0.50384 | 0.49638 | 1.0000 |
| O | O79  | 1.0 | 0.22490 | 0.45175 | 0.41745 | 1.0000 |
| O | O80  | 1.0 | 0.42362 | 0.51735 | 0.40302 | 1.0000 |
| O | O81  | 1.0 | 0.71133 | 0.34241 | 0.44149 | 1.0000 |
| O | O82  | 1.0 | 0.83485 | 0.17052 | 0.43107 | 1.0000 |
| O | O83  | 1.0 | 0.64467 | 0.17395 | 0.39247 | 1.0000 |
| O | O84  | 1.0 | 0.83618 | 0.51103 | 0.42732 | 1.0000 |
| O | O85  | 1.0 | 0.63525 | 0.52340 | 0.40523 | 1.0000 |
| O | O86  | 1.0 | 0.96173 | 0.34001 | 0.43965 | 1.0000 |
| O | O87  | 1.0 | 0.02873 | 0.15948 | 0.39791 | 1.0000 |
| O | O88  | 1.0 | 0.03028 | 0.51768 | 0.39624 | 1.0000 |
| O | O89  | 1.0 | 0.66513 | 0.38408 | 0.69679 | 1.0000 |
| O | O90  | 1.0 | 0.82120 | 0.32975 | 0.75978 | 1.0000 |
| O | O91  | 1.0 | 0.83126 | 0.26792 | 0.66307 | 1.0000 |
| O | O92  | 1.0 | 0.48680 | 0.34224 | 0.74855 | 1.0000 |
| O | O93  | 1.0 | 0.53603 | 0.23074 | 0.66592 | 1.0000 |
| O | O94  | 1.0 | 0.47593 | 0.43577 | 0.66039 | 1.0000 |
| O | O95  | 1.0 | 0.66980 | 0.71879 | 0.68233 | 1.0000 |
| O | O96  | 1.0 | 0.83294 | 0.85319 | 0.69754 | 1.0000 |
| O | O97  | 1.0 | 0.85808 | 0.67546 | 0.64397 | 1.0000 |
| O | O98  | 1.0 | 0.49509 | 0.82901 | 0.69599 | 1.0000 |
| O | O99  | 1.0 | 0.48503 | 0.64722 | 0.64666 | 1.0000 |
| O | O100 | 1.0 | 0.65827 | 0.96949 | 0.69575 | 1.0000 |
| O | O101 | 1.0 | 0.84014 | 0.05297 | 0.66017 | 1.0000 |
| O | O102 | 1.0 | 0.47887 | 0.01136 | 0.64670 | 1.0000 |
| O | O103 | 1.0 | 0.33049 | 0.66132 | 0.19018 | 1.0000 |
| O | O104 | 1.0 | 0.17422 | 0.65772 | 0.25962 | 1.0000 |
| O | O105 | 1.0 | 0.14017 | 0.73438 | 0.16655 | 1.0000 |

|    |      |     |         |         |         |        |
|----|------|-----|---------|---------|---------|--------|
| O  | O106 | 1.0 | 0.50838 | 0.69314 | 0.24256 | 1.0000 |
| O  | O107 | 1.0 | 0.50880 | 0.73186 | 0.14493 | 1.0000 |
| O  | O108 | 1.0 | 0.49497 | 0.53315 | 0.17810 | 1.0000 |
| O  | O109 | 1.0 | 0.34680 | 0.27045 | 0.18759 | 1.0000 |
| O  | O110 | 1.0 | 0.17562 | 0.14620 | 0.19203 | 1.0000 |
| O  | O111 | 1.0 | 0.17036 | 0.32964 | 0.13871 | 1.0000 |
| O  | O112 | 1.0 | 0.51351 | 0.14461 | 0.18239 | 1.0000 |
| O  | O113 | 1.0 | 0.52990 | 0.33934 | 0.14798 | 1.0000 |
| O  | O114 | 1.0 | 0.34315 | 0.01639 | 0.19626 | 1.0000 |
| O  | O115 | 1.0 | 0.16333 | 0.94635 | 0.15799 | 1.0000 |
| O  | O116 | 1.0 | 0.52432 | 0.93855 | 0.16476 | 1.0000 |
| O  | O117 | 1.0 | 0.01364 | 0.83386 | 0.00168 | 1.0000 |
| O  | O118 | 1.0 | 0.99706 | 0.49677 | 0.00423 | 1.0000 |
| O  | O119 | 1.0 | 0.99092 | 0.16917 | 0.49803 | 1.0000 |
| O  | O120 | 1.0 | 0.98715 | 0.51370 | 0.49603 | 1.0000 |
| O  | O121 | 1.0 | 0.17743 | 0.98190 | 0.25609 | 1.0000 |
| O  | O122 | 1.0 | 0.50693 | 0.00744 | 0.25841 | 1.0000 |
| O  | O123 | 1.0 | 0.81806 | 0.01941 | 0.75782 | 1.0000 |
| O  | O124 | 1.0 | 0.48180 | 0.00699 | 0.74706 | 1.0000 |
| O  | O125 | 1.0 | 0.85828 | 0.47117 | 0.68815 | 1.0000 |
| O  | O126 | 1.0 | 0.15494 | 0.01098 | 0.35612 | 1.0000 |
| O  | O127 | 1.0 | 0.17459 | 0.83903 | 0.92509 | 1.0000 |
| O  | O128 | 1.0 | 0.15915 | 0.52591 | 0.18568 | 1.0000 |
| Al | Al1  | 1.0 | 0.46355 | 0.14239 | 0.62968 | 1.0000 |
| Al | Al2  | 1.0 | 0.86571 | 0.54469 | 0.62469 | 1.0000 |
| Al | Al3  | 1.0 | 0.15744 | 0.15518 | 0.37728 | 1.0000 |
| Al | Al4  | 1.0 | 0.03456 | 0.79085 | 0.94108 | 1.0000 |
| Al | Al5  | 1.0 | 0.13847 | 0.45946 | 0.12187 | 1.0000 |
| Si | Si1  | 1.0 | 0.34224 | 0.79699 | 0.05410 | 1.0000 |
| Si | Si2  | 1.0 | 0.33973 | 0.54433 | 0.05771 | 1.0000 |
| Si | Si3  | 1.0 | 0.71658 | 0.80179 | 0.05319 | 1.0000 |
| Si | Si4  | 1.0 | 0.70531 | 0.54431 | 0.05746 | 1.0000 |
| Si | Si5  | 1.0 | 0.95991 | 0.79562 | 0.05401 | 1.0000 |
| Si | Si6  | 1.0 | 0.94935 | 0.53644 | 0.05813 | 1.0000 |

|    |      |     |         |         |         |        |
|----|------|-----|---------|---------|---------|--------|
| Si | Si7  | 1.0 | 0.52928 | 0.85059 | 0.12067 | 1.0000 |
| Si | Si8  | 1.0 | 0.65265 | 0.20686 | 0.55062 | 1.0000 |
| Si | Si9  | 1.0 | 0.66338 | 0.46379 | 0.55745 | 1.0000 |
| Si | Si10 | 1.0 | 0.27689 | 0.21667 | 0.56377 | 1.0000 |
| Si | Si11 | 1.0 | 0.28490 | 0.47463 | 0.54989 | 1.0000 |
| Si | Si12 | 1.0 | 0.03404 | 0.21483 | 0.55183 | 1.0000 |
| Si | Si13 | 1.0 | 0.04260 | 0.47404 | 0.54890 | 1.0000 |
| Si | Si14 | 1.0 | 0.21668 | 0.33536 | 0.29784 | 1.0000 |
| Si | Si15 | 1.0 | 0.46515 | 0.32624 | 0.30490 | 1.0000 |
| Si | Si16 | 1.0 | 0.22375 | 0.70011 | 0.31269 | 1.0000 |
| Si | Si17 | 1.0 | 0.47844 | 0.71392 | 0.30121 | 1.0000 |
| Si | Si18 | 1.0 | 0.47326 | 0.95500 | 0.31234 | 1.0000 |
| Si | Si19 | 1.0 | 0.14888 | 0.50455 | 0.37453 | 1.0000 |
| Si | Si20 | 1.0 | 0.80171 | 0.66329 | 0.80260 | 1.0000 |
| Si | Si21 | 1.0 | 0.54805 | 0.66051 | 0.80445 | 1.0000 |
| Si | Si22 | 1.0 | 0.77035 | 0.29154 | 0.81434 | 1.0000 |
| Si | Si23 | 1.0 | 0.51484 | 0.29215 | 0.80371 | 1.0000 |
| Si | Si24 | 1.0 | 0.76976 | 0.05003 | 0.81285 | 1.0000 |
| Si | Si25 | 1.0 | 0.51397 | 0.04907 | 0.80248 | 1.0000 |
| Si | Si26 | 1.0 | 0.85063 | 0.48336 | 0.87930 | 1.0000 |
| Si | Si27 | 1.0 | 0.65989 | 0.79271 | 0.94086 | 1.0000 |
| Si | Si28 | 1.0 | 0.64795 | 0.54354 | 0.94530 | 1.0000 |
| Si | Si29 | 1.0 | 0.27660 | 0.52992 | 0.94787 | 1.0000 |
| Si | Si30 | 1.0 | 0.03717 | 0.52886 | 0.94758 | 1.0000 |
| Si | Si31 | 1.0 | 0.48110 | 0.85849 | 0.86901 | 1.0000 |
| Si | Si32 | 1.0 | 0.35302 | 0.20090 | 0.45359 | 1.0000 |
| Si | Si33 | 1.0 | 0.34491 | 0.45050 | 0.44079 | 1.0000 |
| Si | Si34 | 1.0 | 0.71630 | 0.21397 | 0.43952 | 1.0000 |
| Si | Si35 | 1.0 | 0.71824 | 0.47144 | 0.44425 | 1.0000 |
| Si | Si36 | 1.0 | 0.95674 | 0.20990 | 0.44145 | 1.0000 |
| Si | Si37 | 1.0 | 0.95438 | 0.46913 | 0.44087 | 1.0000 |
| Si | Si38 | 1.0 | 0.52369 | 0.13836 | 0.38053 | 1.0000 |
| Si | Si39 | 1.0 | 0.53969 | 0.34570 | 0.69208 | 1.0000 |
| Si | Si40 | 1.0 | 0.79743 | 0.72883 | 0.69003 | 1.0000 |

|    |      |     |         |         |         |        |
|----|------|-----|---------|---------|---------|--------|
| Si | Si41 | 1.0 | 0.54287 | 0.71043 | 0.69207 | 1.0000 |
| Si | Si42 | 1.0 | 0.78578 | 0.97336 | 0.70248 | 1.0000 |
| Si | Si43 | 1.0 | 0.52885 | 0.95488 | 0.69525 | 1.0000 |
| Si | Si44 | 1.0 | 0.46054 | 0.65494 | 0.18890 | 1.0000 |
| Si | Si45 | 1.0 | 0.21788 | 0.26999 | 0.18694 | 1.0000 |
| Si | Si46 | 1.0 | 0.47494 | 0.26641 | 0.19187 | 1.0000 |
| Si | Si47 | 1.0 | 0.21514 | 0.02433 | 0.19960 | 1.0000 |
| Si | Si48 | 1.0 | 0.47157 | 0.02725 | 0.20002 | 1.0000 |
| Si | Si49 | 1.0 | 0.14128 | 0.83676 | 0.12702 | 1.0000 |
| Si | Si50 | 1.0 | 0.52424 | 0.46240 | 0.12811 | 1.0000 |
| Si | Si51 | 1.0 | 0.84220 | 0.16271 | 0.62711 | 1.0000 |
| Si | Si52 | 1.0 | 0.46687 | 0.53287 | 0.61955 | 1.0000 |
| Si | Si53 | 1.0 | 0.53244 | 0.51990 | 0.36958 | 1.0000 |
| Si | Si54 | 1.0 | 0.85403 | 0.85313 | 0.87114 | 1.0000 |
| Si | Si55 | 1.0 | 0.46307 | 0.47284 | 0.87597 | 1.0000 |
| Si | Si56 | 1.0 | 0.78942 | 0.35675 | 0.70180 | 1.0000 |
| Si | Si57 | 1.0 | 0.21859 | 0.94140 | 0.31041 | 1.0000 |
| Si | Si58 | 1.0 | 0.29358 | 0.78587 | 0.94188 | 1.0000 |
| Si | Si59 | 1.0 | 0.20412 | 0.64928 | 0.20007 | 1.0000 |



T2T2T7T7T9:

data\_image0

\_chemical\_formula\_structural H5O128Al5Si59  
\_chemical\_formula\_sum "H5 O128 Al5 Si59"  
\_cell\_length\_a 12.5646  
\_cell\_length\_b 12.5411  
\_cell\_length\_c 26.4689  
\_cell\_angle\_alpha 89.9535  
\_cell\_angle\_beta 89.8241  
\_cell\_angle\_gamma 90.4393

\_space\_group\_name\_H-M\_alt "P 1"  
\_space\_group\_IT\_number 1

loop\_

\_space\_group\_symop\_operation\_xyz  
'x, y, z'

loop\_

\_atom\_site\_type\_symbol  
\_atom\_site\_label  
\_atom\_site\_symmetry\_multiplicity  
\_atom\_site\_fract\_x  
\_atom\_site\_fract\_y  
\_atom\_site\_fract\_z  
\_atom\_site\_occupancy  
H H1 1.0 0.48552 0.14656 0.53199 1.0000  
H H2 1.0 0.85154 0.51483 0.71753 1.0000  
H H3 1.0 0.56856 0.83765 0.34512 1.0000  
H H4 1.0 0.16667 0.43050 0.90539 1.0000  
H H5 1.0 0.06464 0.03035 0.14049 1.0000  
O O1 1.0 0.29909 0.65875 0.06051 1.0000  
O O2 1.0 0.34534 0.81912 0.99790 1.0000  
O O3 1.0 0.24066 0.85680 0.08290 1.0000

|   |     |     |         |         |         |        |
|---|-----|-----|---------|---------|---------|--------|
| O | O4  | 1.0 | 0.44617 | 0.80171 | 0.08371 | 1.0000 |
| O | O5  | 1.0 | 0.33499 | 0.50090 | 0.99501 | 1.0000 |
| O | O6  | 1.0 | 0.22998 | 0.46296 | 0.07964 | 1.0000 |
| O | O7  | 1.0 | 0.43953 | 0.50408 | 0.08015 | 1.0000 |
| O | O8  | 1.0 | 0.69658 | 0.67351 | 0.06392 | 1.0000 |
| O | O9  | 1.0 | 0.82749 | 0.84055 | 0.05248 | 1.0000 |
| O | O10 | 1.0 | 0.64308 | 0.86572 | 0.09620 | 1.0000 |
| O | O11 | 1.0 | 0.83540 | 0.51191 | 0.06710 | 1.0000 |
| O | O12 | 1.0 | 0.64342 | 0.48731 | 0.10349 | 1.0000 |
| O | O13 | 1.0 | 0.96438 | 0.67823 | 0.05636 | 1.0000 |
| O | O14 | 1.0 | 0.01038 | 0.86459 | 0.09847 | 1.0000 |
| O | O15 | 1.0 | 0.02721 | 0.50530 | 0.10444 | 1.0000 |
| O | O16 | 1.0 | 0.64009 | 0.33055 | 0.55212 | 1.0000 |
| O | O17 | 1.0 | 0.68840 | 0.16928 | 0.49047 | 1.0000 |
| O | O18 | 1.0 | 0.73975 | 0.15716 | 0.58844 | 1.0000 |
| O | O19 | 1.0 | 0.53885 | 0.14535 | 0.55962 | 1.0000 |
| O | O20 | 1.0 | 0.67840 | 0.50826 | 0.50048 | 1.0000 |
| O | O21 | 1.0 | 0.77284 | 0.47288 | 0.58999 | 1.0000 |
| O | O22 | 1.0 | 0.56328 | 0.51436 | 0.58208 | 1.0000 |
| O | O23 | 1.0 | 0.28338 | 0.32720 | 0.56921 | 1.0000 |
| O | O24 | 1.0 | 0.15400 | 0.15682 | 0.55763 | 1.0000 |
| O | O25 | 1.0 | 0.33737 | 0.13991 | 0.60637 | 1.0000 |
| O | O26 | 1.0 | 0.17300 | 0.50098 | 0.55154 | 1.0000 |
| O | O27 | 1.0 | 0.35475 | 0.51609 | 0.60140 | 1.0000 |
| O | O28 | 1.0 | 0.04146 | 0.33240 | 0.55319 | 1.0000 |
| O | O29 | 1.0 | 0.95333 | 0.15672 | 0.59163 | 1.0000 |
| O | O30 | 1.0 | 0.99925 | 0.50053 | 0.60961 | 1.0000 |
| O | O31 | 1.0 | 0.34227 | 0.37801 | 0.31123 | 1.0000 |
| O | O32 | 1.0 | 0.17128 | 0.34857 | 0.25372 | 1.0000 |
| O | O33 | 1.0 | 0.20421 | 0.22132 | 0.33224 | 1.0000 |
| O | O34 | 1.0 | 0.14975 | 0.42602 | 0.34535 | 1.0000 |
| O | O35 | 1.0 | 0.49567 | 0.32897 | 0.24463 | 1.0000 |
| O | O36 | 1.0 | 0.48627 | 0.23167 | 0.33304 | 1.0000 |
| O | O37 | 1.0 | 0.54158 | 0.43802 | 0.32678 | 1.0000 |

|   |     |     |         |         |         |        |
|---|-----|-----|---------|---------|---------|--------|
| O | O38 | 1.0 | 0.33507 | 0.72606 | 0.31360 | 1.0000 |
| O | O39 | 1.0 | 0.15276 | 0.82914 | 0.31066 | 1.0000 |
| O | O40 | 1.0 | 0.16110 | 0.64005 | 0.35223 | 1.0000 |
| O | O41 | 1.0 | 0.50308 | 0.63661 | 0.35675 | 1.0000 |
| O | O42 | 1.0 | 0.32008 | 0.96250 | 0.31063 | 1.0000 |
| O | O43 | 1.0 | 0.13534 | 0.02270 | 0.35000 | 1.0000 |
| O | O44 | 1.0 | 0.51896 | 0.02929 | 0.35427 | 1.0000 |
| O | O45 | 1.0 | 0.67841 | 0.68883 | 0.81214 | 1.0000 |
| O | O46 | 1.0 | 0.82877 | 0.65696 | 0.74115 | 1.0000 |
| O | O47 | 1.0 | 0.87352 | 0.75521 | 0.82890 | 1.0000 |
| O | O48 | 1.0 | 0.83380 | 0.54418 | 0.82229 | 1.0000 |
| O | O49 | 1.0 | 0.52594 | 0.64234 | 0.74609 | 1.0000 |
| O | O50 | 1.0 | 0.47976 | 0.74542 | 0.83124 | 1.0000 |
| O | O51 | 1.0 | 0.52990 | 0.54157 | 0.83219 | 1.0000 |
| O | O52 | 1.0 | 0.65243 | 0.29039 | 0.81191 | 1.0000 |
| O | O53 | 1.0 | 0.81254 | 0.15441 | 0.82644 | 1.0000 |
| O | O54 | 1.0 | 0.82811 | 0.34969 | 0.85876 | 1.0000 |
| O | O55 | 1.0 | 0.48692 | 0.15607 | 0.81512 | 1.0000 |
| O | O56 | 1.0 | 0.46507 | 0.34588 | 0.84927 | 1.0000 |
| O | O57 | 1.0 | 0.65096 | 0.02284 | 0.80629 | 1.0000 |
| O | O58 | 1.0 | 0.82195 | 0.95449 | 0.85294 | 1.0000 |
| O | O59 | 1.0 | 0.46276 | 0.95573 | 0.83634 | 1.0000 |
| O | O60 | 1.0 | 0.62266 | 0.65767 | 0.93714 | 1.0000 |
| O | O61 | 1.0 | 0.65295 | 0.82556 | 0.99714 | 1.0000 |
| O | O62 | 1.0 | 0.77897 | 0.79658 | 0.91723 | 1.0000 |
| O | O63 | 1.0 | 0.57518 | 0.85217 | 0.90576 | 1.0000 |
| O | O64 | 1.0 | 0.66939 | 0.50525 | 0.00468 | 1.0000 |
| O | O65 | 1.0 | 0.77110 | 0.51407 | 0.91721 | 1.0000 |
| O | O66 | 1.0 | 0.56529 | 0.45675 | 0.92219 | 1.0000 |
| O | O67 | 1.0 | 0.27704 | 0.66621 | 0.93770 | 1.0000 |
| O | O68 | 1.0 | 0.17091 | 0.84759 | 0.93952 | 1.0000 |
| O | O69 | 1.0 | 0.36183 | 0.84112 | 0.89986 | 1.0000 |
| O | O70 | 1.0 | 0.36588 | 0.49706 | 0.89480 | 1.0000 |
| O | O71 | 1.0 | 0.04082 | 0.67853 | 0.93923 | 1.0000 |

|   |      |     |         |         |         |        |
|---|------|-----|---------|---------|---------|--------|
| O | O72  | 1.0 | 0.97873 | 0.86217 | 0.89977 | 1.0000 |
| O | O73  | 1.0 | 0.97274 | 0.48153 | 0.89393 | 1.0000 |
| O | O74  | 1.0 | 0.31091 | 0.32142 | 0.43728 | 1.0000 |
| O | O75  | 1.0 | 0.34188 | 0.17080 | 0.50830 | 1.0000 |
| O | O76  | 1.0 | 0.24377 | 0.12655 | 0.42059 | 1.0000 |
| O | O77  | 1.0 | 0.45470 | 0.16507 | 0.42715 | 1.0000 |
| O | O78  | 1.0 | 0.35855 | 0.47214 | 0.50461 | 1.0000 |
| O | O79  | 1.0 | 0.25324 | 0.52064 | 0.42089 | 1.0000 |
| O | O80  | 1.0 | 0.45724 | 0.47018 | 0.41750 | 1.0000 |
| O | O81  | 1.0 | 0.71301 | 0.34774 | 0.43812 | 1.0000 |
| O | O82  | 1.0 | 0.84539 | 0.18498 | 0.42326 | 1.0000 |
| O | O83  | 1.0 | 0.64976 | 0.17294 | 0.39125 | 1.0000 |
| O | O84  | 1.0 | 0.84274 | 0.51735 | 0.43647 | 1.0000 |
| O | O85  | 1.0 | 0.65372 | 0.53359 | 0.40060 | 1.0000 |
| O | O86  | 1.0 | 0.97171 | 0.35028 | 0.44402 | 1.0000 |
| O | O87  | 1.0 | 0.04538 | 0.18247 | 0.39626 | 1.0000 |
| O | O88  | 1.0 | 0.04275 | 0.53749 | 0.41369 | 1.0000 |
| O | O89  | 1.0 | 0.66892 | 0.35718 | 0.69765 | 1.0000 |
| O | O90  | 1.0 | 0.83051 | 0.31124 | 0.75934 | 1.0000 |
| O | O91  | 1.0 | 0.84323 | 0.25968 | 0.66132 | 1.0000 |
| O | O92  | 1.0 | 0.49145 | 0.31820 | 0.74952 | 1.0000 |
| O | O93  | 1.0 | 0.52487 | 0.22804 | 0.65871 | 1.0000 |
| O | O94  | 1.0 | 0.48608 | 0.43755 | 0.66914 | 1.0000 |
| O | O95  | 1.0 | 0.67159 | 0.71590 | 0.68124 | 1.0000 |
| O | O96  | 1.0 | 0.84210 | 0.84534 | 0.69179 | 1.0000 |
| O | O97  | 1.0 | 0.85739 | 0.66167 | 0.64283 | 1.0000 |
| O | O98  | 1.0 | 0.49902 | 0.82789 | 0.69930 | 1.0000 |
| O | O99  | 1.0 | 0.48262 | 0.64603 | 0.64927 | 1.0000 |
| O | O100 | 1.0 | 0.66760 | 0.95939 | 0.69590 | 1.0000 |
| O | O101 | 1.0 | 0.84335 | 0.04562 | 0.65725 | 1.0000 |
| O | O102 | 1.0 | 0.49844 | 0.00018 | 0.64064 | 1.0000 |
| O | O103 | 1.0 | 0.34428 | 0.69272 | 0.19009 | 1.0000 |
| O | O104 | 1.0 | 0.18468 | 0.65150 | 0.25405 | 1.0000 |
| O | O105 | 1.0 | 0.15304 | 0.77315 | 0.17438 | 1.0000 |

|    |      |     |         |         |         |        |
|----|------|-----|---------|---------|---------|--------|
| O  | O106 | 1.0 | 0.18756 | 0.56163 | 0.16550 | 1.0000 |
| O  | O107 | 1.0 | 0.50039 | 0.66472 | 0.25646 | 1.0000 |
| O  | O108 | 1.0 | 0.53773 | 0.77082 | 0.17209 | 1.0000 |
| O  | O109 | 1.0 | 0.50478 | 0.55879 | 0.17201 | 1.0000 |
| O  | O110 | 1.0 | 0.32453 | 0.30384 | 0.18764 | 1.0000 |
| O  | O111 | 1.0 | 0.15741 | 0.17501 | 0.19724 | 1.0000 |
| O  | O112 | 1.0 | 0.13273 | 0.36038 | 0.15468 | 1.0000 |
| O  | O113 | 1.0 | 0.48249 | 0.16316 | 0.18149 | 1.0000 |
| O  | O114 | 1.0 | 0.50763 | 0.35616 | 0.14525 | 1.0000 |
| O  | O115 | 1.0 | 0.31795 | 0.03137 | 0.18974 | 1.0000 |
| O  | O116 | 1.0 | 0.49200 | 0.96972 | 0.14343 | 1.0000 |
| O  | O117 | 1.0 | 0.00291 | 0.84754 | 0.99861 | 1.0000 |
| O  | O118 | 1.0 | 0.00278 | 0.49998 | 0.00444 | 1.0000 |
| O  | O119 | 1.0 | 0.99287 | 0.16829 | 0.49401 | 1.0000 |
| O  | O120 | 1.0 | 0.98419 | 0.51131 | 0.50956 | 1.0000 |
| O  | O121 | 1.0 | 0.15165 | 0.99737 | 0.25159 | 1.0000 |
| O  | O122 | 1.0 | 0.49390 | 0.99567 | 0.24374 | 1.0000 |
| O  | O123 | 1.0 | 0.83154 | 0.00822 | 0.75506 | 1.0000 |
| O  | O124 | 1.0 | 0.49021 | 0.01750 | 0.74083 | 1.0000 |
| O  | O125 | 1.0 | 0.85253 | 0.46087 | 0.69000 | 1.0000 |
| O  | O126 | 1.0 | 0.51250 | 0.83104 | 0.31984 | 1.0000 |
| O  | O127 | 1.0 | 0.17119 | 0.48774 | 0.93027 | 1.0000 |
| O  | O128 | 1.0 | 0.12919 | 0.99503 | 0.15197 | 1.0000 |
| Al | Al1  | 1.0 | 0.46855 | 0.12771 | 0.62321 | 1.0000 |
| Al | Al2  | 1.0 | 0.87118 | 0.53013 | 0.62646 | 1.0000 |
| Al | Al3  | 1.0 | 0.45541 | 0.96729 | 0.30468 | 1.0000 |
| Al | Al4  | 1.0 | 0.03344 | 0.54333 | 0.94447 | 1.0000 |
| Al | Al5  | 1.0 | 0.13524 | 0.85757 | 0.12415 | 1.0000 |
| Si | Si1  | 1.0 | 0.33086 | 0.78632 | 0.05720 | 1.0000 |
| Si | Si2  | 1.0 | 0.32630 | 0.53303 | 0.05496 | 1.0000 |
| Si | Si3  | 1.0 | 0.70559 | 0.80066 | 0.05220 | 1.0000 |
| Si | Si4  | 1.0 | 0.71276 | 0.54554 | 0.05948 | 1.0000 |
| Si | Si5  | 1.0 | 0.95222 | 0.80703 | 0.05195 | 1.0000 |
| Si | Si6  | 1.0 | 0.95839 | 0.54877 | 0.05648 | 1.0000 |

|    |      |     |         |         |         |        |
|----|------|-----|---------|---------|---------|--------|
| Si | Si7  | 1.0 | 0.52852 | 0.85296 | 0.12407 | 1.0000 |
| Si | Si8  | 1.0 | 0.65821 | 0.20462 | 0.54748 | 1.0000 |
| Si | Si9  | 1.0 | 0.66689 | 0.45872 | 0.55742 | 1.0000 |
| Si | Si10 | 1.0 | 0.27666 | 0.19857 | 0.56182 | 1.0000 |
| Si | Si11 | 1.0 | 0.29178 | 0.45378 | 0.55710 | 1.0000 |
| Si | Si12 | 1.0 | 0.03537 | 0.20447 | 0.54964 | 1.0000 |
| Si | Si13 | 1.0 | 0.04951 | 0.46181 | 0.55754 | 1.0000 |
| Si | Si14 | 1.0 | 0.21665 | 0.34296 | 0.31113 | 1.0000 |
| Si | Si15 | 1.0 | 0.46651 | 0.34304 | 0.30385 | 1.0000 |
| Si | Si16 | 1.0 | 0.20632 | 0.71232 | 0.30691 | 1.0000 |
| Si | Si17 | 1.0 | 0.19373 | 0.95251 | 0.30629 | 1.0000 |
| Si | Si18 | 1.0 | 0.15257 | 0.52923 | 0.38271 | 1.0000 |
| Si | Si19 | 1.0 | 0.80365 | 0.66224 | 0.80194 | 1.0000 |
| Si | Si20 | 1.0 | 0.55334 | 0.65534 | 0.80543 | 1.0000 |
| Si | Si21 | 1.0 | 0.78014 | 0.27630 | 0.81434 | 1.0000 |
| Si | Si22 | 1.0 | 0.52454 | 0.27775 | 0.80548 | 1.0000 |
| Si | Si23 | 1.0 | 0.77907 | 0.03401 | 0.80999 | 1.0000 |
| Si | Si24 | 1.0 | 0.52371 | 0.03745 | 0.79912 | 1.0000 |
| Si | Si25 | 1.0 | 0.85334 | 0.47311 | 0.87363 | 1.0000 |
| Si | Si26 | 1.0 | 0.65835 | 0.78357 | 0.93921 | 1.0000 |
| Si | Si27 | 1.0 | 0.65847 | 0.53373 | 0.94538 | 1.0000 |
| Si | Si28 | 1.0 | 0.28753 | 0.79552 | 0.94441 | 1.0000 |
| Si | Si29 | 1.0 | 0.04756 | 0.80544 | 0.94460 | 1.0000 |
| Si | Si30 | 1.0 | 0.47182 | 0.84767 | 0.86880 | 1.0000 |
| Si | Si31 | 1.0 | 0.33703 | 0.19600 | 0.44771 | 1.0000 |
| Si | Si32 | 1.0 | 0.34450 | 0.44640 | 0.44520 | 1.0000 |
| Si | Si33 | 1.0 | 0.72416 | 0.21951 | 0.43566 | 1.0000 |
| Si | Si34 | 1.0 | 0.72183 | 0.47614 | 0.44490 | 1.0000 |
| Si | Si35 | 1.0 | 0.96464 | 0.22182 | 0.43977 | 1.0000 |
| Si | Si36 | 1.0 | 0.96093 | 0.47817 | 0.45156 | 1.0000 |
| Si | Si37 | 1.0 | 0.52691 | 0.14802 | 0.37597 | 1.0000 |
| Si | Si38 | 1.0 | 0.54064 | 0.33210 | 0.69270 | 1.0000 |
| Si | Si39 | 1.0 | 0.80009 | 0.72249 | 0.68795 | 1.0000 |
| Si | Si40 | 1.0 | 0.54530 | 0.70863 | 0.69369 | 1.0000 |

|    |      |     |         |         |         |        |
|----|------|-----|---------|---------|---------|--------|
| Si | Si41 | 1.0 | 0.79527 | 0.96459 | 0.69972 | 1.0000 |
| Si | Si42 | 1.0 | 0.53834 | 0.95128 | 0.69275 | 1.0000 |
| Si | Si43 | 1.0 | 0.21544 | 0.67164 | 0.19471 | 1.0000 |
| Si | Si44 | 1.0 | 0.47059 | 0.67180 | 0.19613 | 1.0000 |
| Si | Si45 | 1.0 | 0.19763 | 0.29898 | 0.19835 | 1.0000 |
| Si | Si46 | 1.0 | 0.45273 | 0.28711 | 0.19000 | 1.0000 |
| Si | Si47 | 1.0 | 0.44908 | 0.03896 | 0.19098 | 1.0000 |
| Si | Si48 | 1.0 | 0.14307 | 0.47474 | 0.12547 | 1.0000 |
| Si | Si49 | 1.0 | 0.52327 | 0.47738 | 0.12501 | 1.0000 |
| Si | Si50 | 1.0 | 0.84511 | 0.15455 | 0.62474 | 1.0000 |
| Si | Si51 | 1.0 | 0.47294 | 0.52722 | 0.62552 | 1.0000 |
| Si | Si52 | 1.0 | 0.15724 | 0.13878 | 0.37491 | 1.0000 |
| Si | Si53 | 1.0 | 0.53809 | 0.51762 | 0.37529 | 1.0000 |
| Si | Si54 | 1.0 | 0.86304 | 0.84192 | 0.87494 | 1.0000 |
| Si | Si55 | 1.0 | 0.48338 | 0.46132 | 0.87486 | 1.0000 |
| Si | Si56 | 1.0 | 0.79481 | 0.34081 | 0.70249 | 1.0000 |
| Si | Si57 | 1.0 | 0.45998 | 0.70673 | 0.31047 | 1.0000 |
| Si | Si58 | 1.0 | 0.29458 | 0.54099 | 0.94056 | 1.0000 |
| Si | Si59 | 1.0 | 0.19485 | 0.05280 | 0.20082 | 1.0000 |

T2T7T7T7T9:

data\_image0

\_chemical\_formula\_structural H5O128Al5Si59  
\_chemical\_formula\_sum "H5 O128 Al5 Si59"  
\_cell\_length\_a 12.5936  
\_cell\_length\_b 12.5006  
\_cell\_length\_c 26.541  
\_cell\_angle\_alpha 89.567  
\_cell\_angle\_beta 90.2077  
\_cell\_angle\_gamma 90.3716

\_space\_group\_name\_H-M\_alt "P 1"  
\_space\_group\_IT\_number 1

loop\_

\_space\_group\_symop\_operation\_xyz  
'x, y, z'

loop\_

\_atom\_site\_type\_symbol  
\_atom\_site\_label  
\_atom\_site\_symmetry\_multiplicity  
\_atom\_site\_fract\_x  
\_atom\_site\_fract\_y  
\_atom\_site\_fract\_z  
\_atom\_site\_occupancy  
H H1 1.0 0.48755 0.12946 0.53317 1.0000  
H H2 1.0 0.85395 0.51724 0.71496 1.0000  
H H3 1.0 0.58165 0.83893 0.34206 1.0000  
H H4 1.0 0.08549 0.02276 0.13304 1.0000  
H H5 1.0 0.15169 0.52719 0.29098 1.0000  
O O1 1.0 0.37550 0.66371 0.05577 1.0000  
O O2 1.0 0.33574 0.82279 0.98942 1.0000  
O O3 1.0 0.24717 0.82432 0.08040 1.0000



|   |     |     |         |         |         |        |
|---|-----|-----|---------|---------|---------|--------|
| O | O4  | 1.0 | 0.45461 | 0.85742 | 0.06740 | 1.0000 |
| O | O5  | 1.0 | 0.32776 | 0.48664 | 0.00407 | 1.0000 |
| O | O6  | 1.0 | 0.22388 | 0.53150 | 0.08764 | 1.0000 |
| O | O7  | 1.0 | 0.42620 | 0.46972 | 0.09026 | 1.0000 |
| O | O8  | 1.0 | 0.71056 | 0.65918 | 0.05948 | 1.0000 |
| O | O9  | 1.0 | 0.83438 | 0.83256 | 0.05501 | 1.0000 |
| O | O10 | 1.0 | 0.65026 | 0.83726 | 0.10225 | 1.0000 |
| O | O11 | 1.0 | 0.83289 | 0.48817 | 0.06139 | 1.0000 |
| O | O12 | 1.0 | 0.63979 | 0.47488 | 0.09557 | 1.0000 |
| O | O13 | 1.0 | 0.95854 | 0.66146 | 0.05436 | 1.0000 |
| O | O14 | 1.0 | 0.02389 | 0.84334 | 0.09598 | 1.0000 |
| O | O15 | 1.0 | 0.02051 | 0.48811 | 0.10352 | 1.0000 |
| O | O16 | 1.0 | 0.62834 | 0.33154 | 0.55325 | 1.0000 |
| O | O17 | 1.0 | 0.68114 | 0.16994 | 0.49295 | 1.0000 |
| O | O18 | 1.0 | 0.73762 | 0.16147 | 0.58975 | 1.0000 |
| O | O19 | 1.0 | 0.53621 | 0.13965 | 0.56201 | 1.0000 |
| O | O20 | 1.0 | 0.66888 | 0.51302 | 0.50289 | 1.0000 |
| O | O21 | 1.0 | 0.76964 | 0.46702 | 0.58979 | 1.0000 |
| O | O22 | 1.0 | 0.56319 | 0.51969 | 0.58617 | 1.0000 |
| O | O23 | 1.0 | 0.28286 | 0.32971 | 0.56039 | 1.0000 |
| O | O24 | 1.0 | 0.14788 | 0.16357 | 0.55848 | 1.0000 |
| O | O25 | 1.0 | 0.33200 | 0.15066 | 0.60810 | 1.0000 |
| O | O26 | 1.0 | 0.17018 | 0.50601 | 0.55437 | 1.0000 |
| O | O27 | 1.0 | 0.35424 | 0.51254 | 0.60062 | 1.0000 |
| O | O28 | 1.0 | 0.03294 | 0.34030 | 0.55863 | 1.0000 |
| O | O29 | 1.0 | 0.95086 | 0.15754 | 0.59445 | 1.0000 |
| O | O30 | 1.0 | 0.99056 | 0.52221 | 0.60323 | 1.0000 |
| O | O31 | 1.0 | 0.33666 | 0.37503 | 0.30595 | 1.0000 |
| O | O32 | 1.0 | 0.17135 | 0.33336 | 0.24450 | 1.0000 |
| O | O33 | 1.0 | 0.16862 | 0.26168 | 0.33880 | 1.0000 |
| O | O34 | 1.0 | 0.50423 | 0.30791 | 0.25440 | 1.0000 |
| O | O35 | 1.0 | 0.46071 | 0.22459 | 0.34363 | 1.0000 |
| O | O36 | 1.0 | 0.53239 | 0.42728 | 0.33432 | 1.0000 |
| O | O37 | 1.0 | 0.34925 | 0.74244 | 0.30289 | 1.0000 |

|   |     |     |         |         |         |        |
|---|-----|-----|---------|---------|---------|--------|
| O | O38 | 1.0 | 0.16991 | 0.84835 | 0.30987 | 1.0000 |
| O | O39 | 1.0 | 0.19707 | 0.66506 | 0.36220 | 1.0000 |
| O | O40 | 1.0 | 0.51576 | 0.63773 | 0.34548 | 1.0000 |
| O | O41 | 1.0 | 0.33756 | 0.98095 | 0.30834 | 1.0000 |
| O | O42 | 1.0 | 0.15170 | 0.04831 | 0.34320 | 1.0000 |
| O | O43 | 1.0 | 0.54041 | 0.02861 | 0.35091 | 1.0000 |
| O | O44 | 1.0 | 0.66929 | 0.62727 | 0.81313 | 1.0000 |
| O | O45 | 1.0 | 0.82032 | 0.64914 | 0.74158 | 1.0000 |
| O | O46 | 1.0 | 0.83132 | 0.76338 | 0.82533 | 1.0000 |
| O | O47 | 1.0 | 0.86344 | 0.55099 | 0.82566 | 1.0000 |
| O | O48 | 1.0 | 0.50835 | 0.64394 | 0.74866 | 1.0000 |
| O | O49 | 1.0 | 0.51993 | 0.77338 | 0.82751 | 1.0000 |
| O | O50 | 1.0 | 0.47262 | 0.56956 | 0.83984 | 1.0000 |
| O | O51 | 1.0 | 0.65373 | 0.31411 | 0.81188 | 1.0000 |
| O | O52 | 1.0 | 0.79805 | 0.15930 | 0.82606 | 1.0000 |
| O | O53 | 1.0 | 0.83264 | 0.35218 | 0.85905 | 1.0000 |
| O | O54 | 1.0 | 0.50639 | 0.16176 | 0.82047 | 1.0000 |
| O | O55 | 1.0 | 0.45990 | 0.35730 | 0.84192 | 1.0000 |
| O | O56 | 1.0 | 0.65072 | 0.00669 | 0.81372 | 1.0000 |
| O | O57 | 1.0 | 0.83805 | 0.96377 | 0.85426 | 1.0000 |
| O | O58 | 1.0 | 0.45571 | 0.96870 | 0.84586 | 1.0000 |
| O | O59 | 1.0 | 0.62136 | 0.66107 | 0.93762 | 1.0000 |
| O | O60 | 1.0 | 0.65567 | 0.82288 | 0.00192 | 1.0000 |
| O | O61 | 1.0 | 0.76419 | 0.81229 | 0.91732 | 1.0000 |
| O | O62 | 1.0 | 0.55558 | 0.85736 | 0.91732 | 1.0000 |
| O | O63 | 1.0 | 0.66626 | 0.49669 | 0.99853 | 1.0000 |
| O | O64 | 1.0 | 0.77226 | 0.52236 | 0.91418 | 1.0000 |
| O | O65 | 1.0 | 0.56817 | 0.46159 | 0.91317 | 1.0000 |
| O | O66 | 1.0 | 0.28478 | 0.64699 | 0.94148 | 1.0000 |
| O | O67 | 1.0 | 0.16426 | 0.81930 | 0.93003 | 1.0000 |
| O | O68 | 1.0 | 0.35572 | 0.81155 | 0.88970 | 1.0000 |
| O | O69 | 1.0 | 0.16240 | 0.47598 | 0.94124 | 1.0000 |
| O | O70 | 1.0 | 0.35613 | 0.46304 | 0.90677 | 1.0000 |
| O | O71 | 1.0 | 0.03742 | 0.65101 | 0.94281 | 1.0000 |

|   |      |     |         |         |         |        |
|---|------|-----|---------|---------|---------|--------|
| O | O72  | 1.0 | 0.96848 | 0.82592 | 0.89637 | 1.0000 |
| O | O73  | 1.0 | 0.97307 | 0.46918 | 0.90339 | 1.0000 |
| O | O74  | 1.0 | 0.37438 | 0.31660 | 0.44423 | 1.0000 |
| O | O75  | 1.0 | 0.33396 | 0.15687 | 0.50930 | 1.0000 |
| O | O76  | 1.0 | 0.24221 | 0.15637 | 0.41859 | 1.0000 |
| O | O77  | 1.0 | 0.45099 | 0.12357 | 0.43084 | 1.0000 |
| O | O78  | 1.0 | 0.34834 | 0.48811 | 0.50192 | 1.0000 |
| O | O79  | 1.0 | 0.23090 | 0.45975 | 0.41759 | 1.0000 |
| O | O80  | 1.0 | 0.43550 | 0.50935 | 0.41430 | 1.0000 |
| O | O81  | 1.0 | 0.70867 | 0.35170 | 0.44340 | 1.0000 |
| O | O82  | 1.0 | 0.83670 | 0.18675 | 0.42562 | 1.0000 |
| O | O83  | 1.0 | 0.63978 | 0.18513 | 0.39455 | 1.0000 |
| O | O84  | 1.0 | 0.83427 | 0.52174 | 0.43960 | 1.0000 |
| O | O85  | 1.0 | 0.64397 | 0.53483 | 0.40350 | 1.0000 |
| O | O86  | 1.0 | 0.96672 | 0.35337 | 0.43760 | 1.0000 |
| O | O87  | 1.0 | 0.03492 | 0.16808 | 0.40087 | 1.0000 |
| O | O88  | 1.0 | 0.02330 | 0.54449 | 0.40287 | 1.0000 |
| O | O89  | 1.0 | 0.67024 | 0.36339 | 0.69730 | 1.0000 |
| O | O90  | 1.0 | 0.83133 | 0.31766 | 0.75985 | 1.0000 |
| O | O91  | 1.0 | 0.84152 | 0.25720 | 0.66396 | 1.0000 |
| O | O92  | 1.0 | 0.49458 | 0.30682 | 0.74674 | 1.0000 |
| O | O93  | 1.0 | 0.52984 | 0.23549 | 0.65427 | 1.0000 |
| O | O94  | 1.0 | 0.48375 | 0.44192 | 0.67195 | 1.0000 |
| O | O95  | 1.0 | 0.65826 | 0.71721 | 0.68719 | 1.0000 |
| O | O96  | 1.0 | 0.83016 | 0.84348 | 0.69609 | 1.0000 |
| O | O97  | 1.0 | 0.83766 | 0.66347 | 0.64313 | 1.0000 |
| O | O98  | 1.0 | 0.48738 | 0.83124 | 0.70224 | 1.0000 |
| O | O99  | 1.0 | 0.47185 | 0.64933 | 0.65099 | 1.0000 |
| O | O100 | 1.0 | 0.65827 | 0.96205 | 0.69755 | 1.0000 |
| O | O101 | 1.0 | 0.83589 | 0.04258 | 0.65787 | 1.0000 |
| O | O102 | 1.0 | 0.48306 | 0.00799 | 0.64796 | 1.0000 |
| O | O103 | 1.0 | 0.33449 | 0.64285 | 0.19373 | 1.0000 |
| O | O104 | 1.0 | 0.17983 | 0.65496 | 0.26324 | 1.0000 |
| O | O105 | 1.0 | 0.16858 | 0.77323 | 0.17898 | 1.0000 |

|    |      |     |         |         |         |        |
|----|------|-----|---------|---------|---------|--------|
| O  | O106 | 1.0 | 0.14330 | 0.55885 | 0.17889 | 1.0000 |
| O  | O107 | 1.0 | 0.51032 | 0.67977 | 0.24684 | 1.0000 |
| O  | O108 | 1.0 | 0.48175 | 0.78261 | 0.16060 | 1.0000 |
| O  | O109 | 1.0 | 0.52413 | 0.57536 | 0.16318 | 1.0000 |
| O  | O110 | 1.0 | 0.34378 | 0.32045 | 0.18966 | 1.0000 |
| O  | O111 | 1.0 | 0.19119 | 0.17169 | 0.18052 | 1.0000 |
| O  | O112 | 1.0 | 0.16091 | 0.36267 | 0.14446 | 1.0000 |
| O  | O113 | 1.0 | 0.48590 | 0.16640 | 0.18032 | 1.0000 |
| O  | O114 | 1.0 | 0.53804 | 0.36385 | 0.15982 | 1.0000 |
| O  | O115 | 1.0 | 0.33822 | 0.01401 | 0.18223 | 1.0000 |
| O  | O116 | 1.0 | 0.52622 | 0.98356 | 0.14022 | 1.0000 |
| O  | O117 | 1.0 | 0.00384 | 0.82723 | 0.99559 | 1.0000 |
| O  | O118 | 1.0 | 0.00121 | 0.48498 | 0.00330 | 1.0000 |
| O  | O119 | 1.0 | 0.98237 | 0.18078 | 0.49731 | 1.0000 |
| O  | O120 | 1.0 | 0.99368 | 0.51208 | 0.50252 | 1.0000 |
| O  | O121 | 1.0 | 0.17270 | 0.01204 | 0.24637 | 1.0000 |
| O  | O122 | 1.0 | 0.51133 | 0.99669 | 0.24049 | 1.0000 |
| O  | O123 | 1.0 | 0.82298 | 0.01251 | 0.75590 | 1.0000 |
| O  | O124 | 1.0 | 0.48862 | 0.01709 | 0.74857 | 1.0000 |
| O  | O125 | 1.0 | 0.85638 | 0.46202 | 0.68801 | 1.0000 |
| O  | O126 | 1.0 | 0.52922 | 0.83546 | 0.31495 | 1.0000 |
| O  | O127 | 1.0 | 0.14630 | 0.98387 | 0.14661 | 1.0000 |
| O  | O128 | 1.0 | 0.15119 | 0.47047 | 0.31797 | 1.0000 |
| Al | Al1  | 1.0 | 0.46265 | 0.13350 | 0.62464 | 1.0000 |
| Al | Al2  | 1.0 | 0.86391 | 0.53499 | 0.62450 | 1.0000 |
| Al | Al3  | 1.0 | 0.47263 | 0.97231 | 0.30139 | 1.0000 |
| Al | Al4  | 1.0 | 0.14799 | 0.84149 | 0.12304 | 1.0000 |
| Al | Al5  | 1.0 | 0.15072 | 0.54137 | 0.38188 | 1.0000 |
| Si | Si1  | 1.0 | 0.34955 | 0.79212 | 0.04880 | 1.0000 |
| Si | Si2  | 1.0 | 0.33852 | 0.53923 | 0.05948 | 1.0000 |
| Si | Si3  | 1.0 | 0.71337 | 0.78833 | 0.05442 | 1.0000 |
| Si | Si4  | 1.0 | 0.71278 | 0.53087 | 0.05323 | 1.0000 |
| Si | Si5  | 1.0 | 0.95675 | 0.79178 | 0.05072 | 1.0000 |
| Si | Si6  | 1.0 | 0.95355 | 0.53235 | 0.05531 | 1.0000 |

|    |      |     |         |         |         |        |
|----|------|-----|---------|---------|---------|--------|
| Si | Si7  | 1.0 | 0.52842 | 0.86383 | 0.11729 | 1.0000 |
| Si | Si8  | 1.0 | 0.65212 | 0.20569 | 0.54973 | 1.0000 |
| Si | Si9  | 1.0 | 0.66043 | 0.45915 | 0.55907 | 1.0000 |
| Si | Si10 | 1.0 | 0.27209 | 0.20039 | 0.56060 | 1.0000 |
| Si | Si11 | 1.0 | 0.28871 | 0.45871 | 0.55474 | 1.0000 |
| Si | Si12 | 1.0 | 0.02904 | 0.21224 | 0.55259 | 1.0000 |
| Si | Si13 | 1.0 | 0.04576 | 0.47057 | 0.55533 | 1.0000 |
| Si | Si14 | 1.0 | 0.45962 | 0.33307 | 0.31018 | 1.0000 |
| Si | Si15 | 1.0 | 0.22106 | 0.72932 | 0.31161 | 1.0000 |
| Si | Si16 | 1.0 | 0.21146 | 0.97192 | 0.30297 | 1.0000 |
| Si | Si17 | 1.0 | 0.79481 | 0.64947 | 0.80211 | 1.0000 |
| Si | Si18 | 1.0 | 0.54259 | 0.65361 | 0.80726 | 1.0000 |
| Si | Si19 | 1.0 | 0.77842 | 0.28435 | 0.81414 | 1.0000 |
| Si | Si20 | 1.0 | 0.52867 | 0.28451 | 0.80457 | 1.0000 |
| Si | Si21 | 1.0 | 0.77682 | 0.03492 | 0.81199 | 1.0000 |
| Si | Si22 | 1.0 | 0.52585 | 0.03820 | 0.80614 | 1.0000 |
| Si | Si23 | 1.0 | 0.85912 | 0.47375 | 0.87565 | 1.0000 |
| Si | Si24 | 1.0 | 0.64975 | 0.78840 | 0.94323 | 1.0000 |
| Si | Si25 | 1.0 | 0.65690 | 0.53588 | 0.94037 | 1.0000 |
| Si | Si26 | 1.0 | 0.28487 | 0.77609 | 0.93778 | 1.0000 |
| Si | Si27 | 1.0 | 0.28306 | 0.51880 | 0.94839 | 1.0000 |
| Si | Si28 | 1.0 | 0.04312 | 0.78091 | 0.94167 | 1.0000 |
| Si | Si29 | 1.0 | 0.04337 | 0.52194 | 0.94794 | 1.0000 |
| Si | Si30 | 1.0 | 0.47141 | 0.85119 | 0.87057 | 1.0000 |
| Si | Si31 | 1.0 | 0.34762 | 0.18999 | 0.45012 | 1.0000 |
| Si | Si32 | 1.0 | 0.34367 | 0.44361 | 0.44464 | 1.0000 |
| Si | Si33 | 1.0 | 0.71742 | 0.22384 | 0.43916 | 1.0000 |
| Si | Si34 | 1.0 | 0.71465 | 0.48062 | 0.44811 | 1.0000 |
| Si | Si35 | 1.0 | 0.95649 | 0.22461 | 0.44090 | 1.0000 |
| Si | Si36 | 1.0 | 0.95697 | 0.48313 | 0.44556 | 1.0000 |
| Si | Si37 | 1.0 | 0.52369 | 0.13862 | 0.38000 | 1.0000 |
| Si | Si38 | 1.0 | 0.54303 | 0.33455 | 0.69139 | 1.0000 |
| Si | Si39 | 1.0 | 0.78673 | 0.72104 | 0.69034 | 1.0000 |
| Si | Si40 | 1.0 | 0.53135 | 0.71086 | 0.69670 | 1.0000 |

|    |      |     |         |         |         |        |
|----|------|-----|---------|---------|---------|--------|
| Si | Si41 | 1.0 | 0.78589 | 0.96490 | 0.70145 | 1.0000 |
| Si | Si42 | 1.0 | 0.52880 | 0.95480 | 0.69805 | 1.0000 |
| Si | Si43 | 1.0 | 0.20683 | 0.66158 | 0.20207 | 1.0000 |
| Si | Si44 | 1.0 | 0.46059 | 0.67080 | 0.18983 | 1.0000 |
| Si | Si45 | 1.0 | 0.21758 | 0.29766 | 0.18972 | 1.0000 |
| Si | Si46 | 1.0 | 0.46828 | 0.28854 | 0.19633 | 1.0000 |
| Si | Si47 | 1.0 | 0.46737 | 0.03886 | 0.18744 | 1.0000 |
| Si | Si48 | 1.0 | 0.13796 | 0.48636 | 0.12808 | 1.0000 |
| Si | Si49 | 1.0 | 0.53043 | 0.47225 | 0.12652 | 1.0000 |
| Si | Si50 | 1.0 | 0.84197 | 0.15402 | 0.62646 | 1.0000 |
| Si | Si51 | 1.0 | 0.46880 | 0.52983 | 0.62717 | 1.0000 |
| Si | Si52 | 1.0 | 0.15045 | 0.15759 | 0.37568 | 1.0000 |
| Si | Si53 | 1.0 | 0.53129 | 0.52408 | 0.37517 | 1.0000 |
| Si | Si54 | 1.0 | 0.85001 | 0.84117 | 0.87368 | 1.0000 |
| Si | Si55 | 1.0 | 0.46556 | 0.46386 | 0.87553 | 1.0000 |
| Si | Si56 | 1.0 | 0.79576 | 0.34407 | 0.70239 | 1.0000 |
| Si | Si57 | 1.0 | 0.47288 | 0.71496 | 0.30207 | 1.0000 |
| Si | Si58 | 1.0 | 0.21757 | 0.04769 | 0.19222 | 1.0000 |
| Si | Si59 | 1.0 | 0.20986 | 0.35432 | 0.30196 | 1.0000 |

T2T7T7T9T9:

data\_image0

\_chemical\_formula\_structural H5O128Al5Si59  
\_chemical\_formula\_sum "H5 O128 Al5 Si59"  
\_cell\_length\_a 12.5675  
\_cell\_length\_b 12.5092  
\_cell\_length\_c 26.5268  
\_cell\_angle\_alpha 90.1438  
\_cell\_angle\_beta 89.9847  
\_cell\_angle\_gamma 90.4184

\_space\_group\_name\_H-M\_alt "P 1"  
\_space\_group\_IT\_number 1

loop\_

\_space\_group\_symop\_operation\_xyz  
'x, y, z'

loop\_

\_atom\_site\_type\_symbol  
\_atom\_site\_label  
\_atom\_site\_symmetry\_multiplicity  
\_atom\_site\_fract\_x  
\_atom\_site\_fract\_y  
\_atom\_site\_fract\_z  
\_atom\_site\_occupancy  
H H1 1.0 0.48820 0.14108 0.53060 1.0000  
H H2 1.0 0.85059 0.52347 0.71375 1.0000  
H H3 1.0 0.56905 0.83642 0.34306 1.0000  
H H4 1.0 0.06334 0.02444 0.14015 1.0000  
H H5 1.0 0.90721 0.02549 0.87047 1.0000  
O O1 1.0 0.29524 0.66569 0.06191 1.0000  
O O2 1.0 0.35749 0.81008 0.99323 1.0000  
O O3 1.0 0.24518 0.86912 0.07424 1.0000

|   |     |     |         |         |         |        |
|---|-----|-----|---------|---------|---------|--------|
| O | O4  | 1.0 | 0.44843 | 0.80615 | 0.08157 | 1.0000 |
| O | O5  | 1.0 | 0.33942 | 0.50318 | 0.00006 | 1.0000 |
| O | O6  | 1.0 | 0.23171 | 0.46868 | 0.08377 | 1.0000 |
| O | O7  | 1.0 | 0.43794 | 0.51733 | 0.08656 | 1.0000 |
| O | O8  | 1.0 | 0.69941 | 0.66041 | 0.06618 | 1.0000 |
| O | O9  | 1.0 | 0.83013 | 0.82883 | 0.05815 | 1.0000 |
| O | O10 | 1.0 | 0.64698 | 0.84792 | 0.10501 | 1.0000 |
| O | O11 | 1.0 | 0.83061 | 0.49408 | 0.06065 | 1.0000 |
| O | O12 | 1.0 | 0.64097 | 0.46800 | 0.09669 | 1.0000 |
| O | O13 | 1.0 | 0.96173 | 0.66285 | 0.05625 | 1.0000 |
| O | O14 | 1.0 | 0.02048 | 0.84510 | 0.09904 | 1.0000 |
| O | O15 | 1.0 | 0.02129 | 0.47999 | 0.09778 | 1.0000 |
| O | O16 | 1.0 | 0.63641 | 0.33119 | 0.55129 | 1.0000 |
| O | O17 | 1.0 | 0.69081 | 0.17029 | 0.49050 | 1.0000 |
| O | O18 | 1.0 | 0.74005 | 0.15974 | 0.58856 | 1.0000 |
| O | O19 | 1.0 | 0.54050 | 0.14163 | 0.55856 | 1.0000 |
| O | O20 | 1.0 | 0.67537 | 0.50908 | 0.50010 | 1.0000 |
| O | O21 | 1.0 | 0.77546 | 0.47041 | 0.58751 | 1.0000 |
| O | O22 | 1.0 | 0.56687 | 0.51780 | 0.58384 | 1.0000 |
| O | O23 | 1.0 | 0.28549 | 0.32832 | 0.56871 | 1.0000 |
| O | O24 | 1.0 | 0.15311 | 0.16103 | 0.55748 | 1.0000 |
| O | O25 | 1.0 | 0.33759 | 0.14020 | 0.60528 | 1.0000 |
| O | O26 | 1.0 | 0.17508 | 0.50251 | 0.55197 | 1.0000 |
| O | O27 | 1.0 | 0.35799 | 0.51640 | 0.60136 | 1.0000 |
| O | O28 | 1.0 | 0.03809 | 0.33721 | 0.55540 | 1.0000 |
| O | O29 | 1.0 | 0.95354 | 0.15670 | 0.59118 | 1.0000 |
| O | O30 | 1.0 | 0.99907 | 0.51424 | 0.60701 | 1.0000 |
| O | O31 | 1.0 | 0.34158 | 0.37721 | 0.31122 | 1.0000 |
| O | O32 | 1.0 | 0.16899 | 0.34598 | 0.25449 | 1.0000 |
| O | O33 | 1.0 | 0.20513 | 0.21941 | 0.33234 | 1.0000 |
| O | O34 | 1.0 | 0.14883 | 0.42333 | 0.34591 | 1.0000 |
| O | O35 | 1.0 | 0.49593 | 0.32893 | 0.24509 | 1.0000 |
| O | O36 | 1.0 | 0.48713 | 0.23220 | 0.33350 | 1.0000 |
| O | O37 | 1.0 | 0.54029 | 0.43937 | 0.32694 | 1.0000 |



|   |     |     |         |         |         |        |
|---|-----|-----|---------|---------|---------|--------|
| O | O38 | 1.0 | 0.33390 | 0.72667 | 0.30930 | 1.0000 |
| O | O39 | 1.0 | 0.15090 | 0.82878 | 0.31075 | 1.0000 |
| O | O40 | 1.0 | 0.16482 | 0.63717 | 0.34972 | 1.0000 |
| O | O41 | 1.0 | 0.49766 | 0.63760 | 0.35780 | 1.0000 |
| O | O42 | 1.0 | 0.31859 | 0.96253 | 0.31002 | 1.0000 |
| O | O43 | 1.0 | 0.13332 | 0.02230 | 0.34874 | 1.0000 |
| O | O44 | 1.0 | 0.51740 | 0.02863 | 0.35410 | 1.0000 |
| O | O45 | 1.0 | 0.67045 | 0.63486 | 0.81036 | 1.0000 |
| O | O46 | 1.0 | 0.82363 | 0.64905 | 0.73872 | 1.0000 |
| O | O47 | 1.0 | 0.83322 | 0.77234 | 0.82040 | 1.0000 |
| O | O48 | 1.0 | 0.86139 | 0.55776 | 0.82415 | 1.0000 |
| O | O49 | 1.0 | 0.51010 | 0.65126 | 0.74717 | 1.0000 |
| O | O50 | 1.0 | 0.51511 | 0.77453 | 0.82912 | 1.0000 |
| O | O51 | 1.0 | 0.47654 | 0.56755 | 0.83641 | 1.0000 |
| O | O52 | 1.0 | 0.65966 | 0.32798 | 0.80976 | 1.0000 |
| O | O53 | 1.0 | 0.79910 | 0.16854 | 0.82363 | 1.0000 |
| O | O54 | 1.0 | 0.84116 | 0.35943 | 0.85734 | 1.0000 |
| O | O55 | 1.0 | 0.52674 | 0.16508 | 0.81912 | 1.0000 |
| O | O56 | 1.0 | 0.46345 | 0.35614 | 0.84155 | 1.0000 |
| O | O57 | 1.0 | 0.66171 | 0.00295 | 0.81272 | 1.0000 |
| O | O58 | 1.0 | 0.46621 | 0.97449 | 0.84594 | 1.0000 |
| O | O59 | 1.0 | 0.62040 | 0.66475 | 0.93675 | 1.0000 |
| O | O60 | 1.0 | 0.64931 | 0.82026 | 0.00539 | 1.0000 |
| O | O61 | 1.0 | 0.76798 | 0.81616 | 0.92263 | 1.0000 |
| O | O62 | 1.0 | 0.56108 | 0.86265 | 0.91824 | 1.0000 |
| O | O63 | 1.0 | 0.66409 | 0.50416 | 0.99902 | 1.0000 |
| O | O64 | 1.0 | 0.77332 | 0.52474 | 0.91442 | 1.0000 |
| O | O65 | 1.0 | 0.56919 | 0.46538 | 0.91237 | 1.0000 |
| O | O66 | 1.0 | 0.28944 | 0.65417 | 0.93325 | 1.0000 |
| O | O67 | 1.0 | 0.17516 | 0.83099 | 0.94284 | 1.0000 |
| O | O68 | 1.0 | 0.35759 | 0.83133 | 0.89330 | 1.0000 |
| O | O69 | 1.0 | 0.16525 | 0.48470 | 0.94245 | 1.0000 |
| O | O70 | 1.0 | 0.35587 | 0.46561 | 0.90347 | 1.0000 |
| O | O71 | 1.0 | 0.04572 | 0.66204 | 0.94398 | 1.0000 |

|   |      |     |         |         |         |        |
|---|------|-----|---------|---------|---------|--------|
| O | O72  | 1.0 | 0.98806 | 0.84247 | 0.89865 | 1.0000 |
| O | O73  | 1.0 | 0.97867 | 0.48496 | 0.89946 | 1.0000 |
| O | O74  | 1.0 | 0.30918 | 0.32096 | 0.43729 | 1.0000 |
| O | O75  | 1.0 | 0.34047 | 0.17003 | 0.50766 | 1.0000 |
| O | O76  | 1.0 | 0.24437 | 0.12429 | 0.41994 | 1.0000 |
| O | O77  | 1.0 | 0.45460 | 0.16528 | 0.42713 | 1.0000 |
| O | O78  | 1.0 | 0.35888 | 0.47332 | 0.50431 | 1.0000 |
| O | O79  | 1.0 | 0.25002 | 0.52033 | 0.42149 | 1.0000 |
| O | O80  | 1.0 | 0.45499 | 0.46963 | 0.41724 | 1.0000 |
| O | O81  | 1.0 | 0.71141 | 0.34850 | 0.43747 | 1.0000 |
| O | O82  | 1.0 | 0.84599 | 0.18720 | 0.42281 | 1.0000 |
| O | O83  | 1.0 | 0.64976 | 0.17092 | 0.39172 | 1.0000 |
| O | O84  | 1.0 | 0.84118 | 0.51838 | 0.43699 | 1.0000 |
| O | O85  | 1.0 | 0.65141 | 0.53535 | 0.40083 | 1.0000 |
| O | O86  | 1.0 | 0.97367 | 0.35318 | 0.44200 | 1.0000 |
| O | O87  | 1.0 | 0.04618 | 0.18164 | 0.39663 | 1.0000 |
| O | O88  | 1.0 | 0.03992 | 0.54156 | 0.41096 | 1.0000 |
| O | O89  | 1.0 | 0.67385 | 0.36086 | 0.69591 | 1.0000 |
| O | O90  | 1.0 | 0.83788 | 0.32132 | 0.75747 | 1.0000 |
| O | O91  | 1.0 | 0.84704 | 0.26017 | 0.66135 | 1.0000 |
| O | O92  | 1.0 | 0.49836 | 0.30797 | 0.74565 | 1.0000 |
| O | O93  | 1.0 | 0.52806 | 0.24059 | 0.65159 | 1.0000 |
| O | O94  | 1.0 | 0.49060 | 0.44716 | 0.67181 | 1.0000 |
| O | O95  | 1.0 | 0.66462 | 0.72299 | 0.68570 | 1.0000 |
| O | O96  | 1.0 | 0.84008 | 0.84535 | 0.69452 | 1.0000 |
| O | O97  | 1.0 | 0.84384 | 0.66621 | 0.64039 | 1.0000 |
| O | O98  | 1.0 | 0.49325 | 0.83608 | 0.70007 | 1.0000 |
| O | O99  | 1.0 | 0.48041 | 0.65306 | 0.64887 | 1.0000 |
| O | O100 | 1.0 | 0.66804 | 0.96341 | 0.69868 | 1.0000 |
| O | O101 | 1.0 | 0.84272 | 0.04527 | 0.65666 | 1.0000 |
| O | O102 | 1.0 | 0.49785 | 0.01166 | 0.64657 | 1.0000 |
| O | O103 | 1.0 | 0.34482 | 0.64088 | 0.18995 | 1.0000 |
| O | O104 | 1.0 | 0.17812 | 0.65645 | 0.25112 | 1.0000 |
| O | O105 | 1.0 | 0.19201 | 0.78321 | 0.17095 | 1.0000 |

|    |      |     |         |         |         |        |
|----|------|-----|---------|---------|---------|--------|
| O  | O106 | 1.0 | 0.15292 | 0.57323 | 0.16252 | 1.0000 |
| O  | O107 | 1.0 | 0.50186 | 0.65752 | 0.25754 | 1.0000 |
| O  | O108 | 1.0 | 0.51324 | 0.77137 | 0.17513 | 1.0000 |
| O  | O109 | 1.0 | 0.53560 | 0.55836 | 0.17267 | 1.0000 |
| O  | O110 | 1.0 | 0.32321 | 0.30035 | 0.18978 | 1.0000 |
| O  | O111 | 1.0 | 0.15569 | 0.17257 | 0.19667 | 1.0000 |
| O  | O112 | 1.0 | 0.13343 | 0.36129 | 0.15637 | 1.0000 |
| O  | O113 | 1.0 | 0.48344 | 0.16287 | 0.18174 | 1.0000 |
| O  | O114 | 1.0 | 0.50202 | 0.35611 | 0.14570 | 1.0000 |
| O  | O115 | 1.0 | 0.31868 | 0.03088 | 0.18861 | 1.0000 |
| O  | O116 | 1.0 | 0.49596 | 0.97013 | 0.14348 | 1.0000 |
| O  | O117 | 1.0 | 0.00029 | 0.83264 | 0.99905 | 1.0000 |
| O  | O118 | 1.0 | 0.99395 | 0.49173 | 0.99893 | 1.0000 |
| O  | O119 | 1.0 | 0.99228 | 0.17403 | 0.49411 | 1.0000 |
| O  | O120 | 1.0 | 0.98902 | 0.51453 | 0.50727 | 1.0000 |
| O  | O121 | 1.0 | 0.15136 | 0.99461 | 0.24996 | 1.0000 |
| O  | O122 | 1.0 | 0.49314 | 0.99589 | 0.24382 | 1.0000 |
| O  | O123 | 1.0 | 0.83516 | 0.01641 | 0.75458 | 1.0000 |
| O  | O124 | 1.0 | 0.49796 | 0.02039 | 0.74805 | 1.0000 |
| O  | O125 | 1.0 | 0.85626 | 0.46643 | 0.68695 | 1.0000 |
| O  | O126 | 1.0 | 0.51112 | 0.82985 | 0.31873 | 1.0000 |
| O  | O127 | 1.0 | 0.13115 | 0.99294 | 0.14975 | 1.0000 |
| O  | O128 | 1.0 | 0.85184 | 0.98185 | 0.85457 | 1.0000 |
| Al | Al1  | 1.0 | 0.46916 | 0.13338 | 0.62206 | 1.0000 |
| Al | Al2  | 1.0 | 0.86949 | 0.53585 | 0.62381 | 1.0000 |
| Al | Al3  | 1.0 | 0.45393 | 0.96678 | 0.30425 | 1.0000 |
| Al | Al4  | 1.0 | 0.14920 | 0.85736 | 0.12018 | 1.0000 |
| Al | Al5  | 1.0 | 0.85999 | 0.83785 | 0.87626 | 1.0000 |
| Si | Si1  | 1.0 | 0.33495 | 0.79052 | 0.05311 | 1.0000 |
| Si | Si2  | 1.0 | 0.32634 | 0.53972 | 0.05839 | 1.0000 |
| Si | Si3  | 1.0 | 0.70721 | 0.78932 | 0.05812 | 1.0000 |
| Si | Si4  | 1.0 | 0.70894 | 0.53336 | 0.05494 | 1.0000 |
| Si | Si5  | 1.0 | 0.95415 | 0.79292 | 0.05341 | 1.0000 |
| Si | Si6  | 1.0 | 0.95225 | 0.53429 | 0.05328 | 1.0000 |

|    |      |     |         |         |         |        |
|----|------|-----|---------|---------|---------|--------|
| Si | Si7  | 1.0 | 0.52541 | 0.84939 | 0.12604 | 1.0000 |
| Si | Si8  | 1.0 | 0.65828 | 0.20529 | 0.54716 | 1.0000 |
| Si | Si9  | 1.0 | 0.66633 | 0.45914 | 0.55687 | 1.0000 |
| Si | Si10 | 1.0 | 0.27675 | 0.19972 | 0.56106 | 1.0000 |
| Si | Si11 | 1.0 | 0.29382 | 0.45509 | 0.55705 | 1.0000 |
| Si | Si12 | 1.0 | 0.03437 | 0.20889 | 0.54995 | 1.0000 |
| Si | Si13 | 1.0 | 0.05039 | 0.46740 | 0.55675 | 1.0000 |
| Si | Si14 | 1.0 | 0.21628 | 0.34117 | 0.31142 | 1.0000 |
| Si | Si15 | 1.0 | 0.46622 | 0.34313 | 0.30410 | 1.0000 |
| Si | Si16 | 1.0 | 0.20481 | 0.71236 | 0.30460 | 1.0000 |
| Si | Si17 | 1.0 | 0.19231 | 0.95203 | 0.30519 | 1.0000 |
| Si | Si18 | 1.0 | 0.15165 | 0.52905 | 0.38182 | 1.0000 |
| Si | Si19 | 1.0 | 0.79650 | 0.65766 | 0.79976 | 1.0000 |
| Si | Si20 | 1.0 | 0.54331 | 0.65779 | 0.80627 | 1.0000 |
| Si | Si21 | 1.0 | 0.78358 | 0.29542 | 0.81215 | 1.0000 |
| Si | Si22 | 1.0 | 0.53611 | 0.28915 | 0.80324 | 1.0000 |
| Si | Si23 | 1.0 | 0.53643 | 0.03999 | 0.80558 | 1.0000 |
| Si | Si24 | 1.0 | 0.86186 | 0.48330 | 0.87447 | 1.0000 |
| Si | Si25 | 1.0 | 0.65260 | 0.79136 | 0.94548 | 1.0000 |
| Si | Si26 | 1.0 | 0.65690 | 0.54064 | 0.94051 | 1.0000 |
| Si | Si27 | 1.0 | 0.29421 | 0.78246 | 0.94124 | 1.0000 |
| Si | Si28 | 1.0 | 0.28699 | 0.52795 | 0.94529 | 1.0000 |
| Si | Si29 | 1.0 | 0.05101 | 0.79259 | 0.94571 | 1.0000 |
| Si | Si30 | 1.0 | 0.04617 | 0.53316 | 0.94648 | 1.0000 |
| Si | Si31 | 1.0 | 0.47567 | 0.85794 | 0.87248 | 1.0000 |
| Si | Si32 | 1.0 | 0.33646 | 0.19530 | 0.44730 | 1.0000 |
| Si | Si33 | 1.0 | 0.34265 | 0.44644 | 0.44516 | 1.0000 |
| Si | Si34 | 1.0 | 0.72449 | 0.22003 | 0.43549 | 1.0000 |
| Si | Si35 | 1.0 | 0.72003 | 0.47721 | 0.44477 | 1.0000 |
| Si | Si36 | 1.0 | 0.96534 | 0.22432 | 0.43920 | 1.0000 |
| Si | Si37 | 1.0 | 0.96127 | 0.48112 | 0.44988 | 1.0000 |
| Si | Si38 | 1.0 | 0.52666 | 0.14748 | 0.37609 | 1.0000 |
| Si | Si39 | 1.0 | 0.54560 | 0.33699 | 0.69013 | 1.0000 |
| Si | Si40 | 1.0 | 0.79351 | 0.72342 | 0.68842 | 1.0000 |

|    |      |     |         |         |         |        |
|----|------|-----|---------|---------|---------|--------|
| Si | Si41 | 1.0 | 0.53732 | 0.71545 | 0.69537 | 1.0000 |
| Si | Si42 | 1.0 | 0.79570 | 0.96633 | 0.70010 | 1.0000 |
| Si | Si43 | 1.0 | 0.53824 | 0.95801 | 0.69715 | 1.0000 |
| Si | Si44 | 1.0 | 0.21693 | 0.66671 | 0.19240 | 1.0000 |
| Si | Si45 | 1.0 | 0.47202 | 0.65785 | 0.19719 | 1.0000 |
| Si | Si46 | 1.0 | 0.19630 | 0.29664 | 0.19926 | 1.0000 |
| Si | Si47 | 1.0 | 0.45151 | 0.28623 | 0.19081 | 1.0000 |
| Si | Si48 | 1.0 | 0.44996 | 0.03842 | 0.19073 | 1.0000 |
| Si | Si49 | 1.0 | 0.13579 | 0.47279 | 0.12491 | 1.0000 |
| Si | Si50 | 1.0 | 0.52784 | 0.47526 | 0.12525 | 1.0000 |
| Si | Si51 | 1.0 | 0.84591 | 0.15519 | 0.62443 | 1.0000 |
| Si | Si52 | 1.0 | 0.47496 | 0.53236 | 0.62630 | 1.0000 |
| Si | Si53 | 1.0 | 0.15716 | 0.13736 | 0.37463 | 1.0000 |
| Si | Si54 | 1.0 | 0.53553 | 0.51863 | 0.37559 | 1.0000 |
| Si | Si55 | 1.0 | 0.46791 | 0.46576 | 0.87398 | 1.0000 |
| Si | Si56 | 1.0 | 0.80010 | 0.34681 | 0.70033 | 1.0000 |
| Si | Si57 | 1.0 | 0.45854 | 0.70509 | 0.30984 | 1.0000 |
| Si | Si58 | 1.0 | 0.19517 | 0.05033 | 0.19948 | 1.0000 |
| Si | Si59 | 1.0 | 0.78256 | 0.04476 | 0.80841 | 1.0000 |

T7T7T7T7T9:

data\_image0

\_chemical\_formula\_structural H5O128Al5Si59  
\_chemical\_formula\_sum "H5 O128 Al5 Si59"  
\_cell\_length\_a 12.5743  
\_cell\_length\_b 12.5409  
\_cell\_length\_c 26.4602  
\_cell\_angle\_alpha 90.2481  
\_cell\_angle\_beta 89.7222  
\_cell\_angle\_gamma 90.86

\_space\_group\_name\_H-M\_alt "P 1"  
\_space\_group\_IT\_number 1

loop\_

\_space\_group\_symop\_operation\_xyz  
'x, y, z'

loop\_

\_atom\_site\_type\_symbol  
\_atom\_site\_label  
\_atom\_site\_symmetry\_multiplicity  
\_atom\_site\_fract\_x  
\_atom\_site\_fract\_y  
\_atom\_site\_fract\_z  
\_atom\_site\_occupancy  
H H1 1.0 0.48144 0.13462 0.53259 1.0000  
H H2 1.0 0.85351 0.52484 0.71320 1.0000  
H H3 1.0 0.52546 0.85544 0.03561 1.0000  
H H4 1.0 0.13385 0.48529 0.21722 1.0000  
H H5 1.0 0.90343 0.02333 0.86972 1.0000  
O O1 1.0 0.37274 0.66841 0.05220 1.0000  
O O2 1.0 0.33391 0.83031 0.99014 1.0000  
O O3 1.0 0.26230 0.83780 0.08581 1.0000

|   |     |     |         |         |         |        |
|---|-----|-----|---------|---------|---------|--------|
| O | O4  | 1.0 | 0.31057 | 0.48832 | 0.00565 | 1.0000 |
| O | O5  | 1.0 | 0.24198 | 0.53366 | 0.09819 | 1.0000 |
| O | O6  | 1.0 | 0.44504 | 0.48098 | 0.07952 | 1.0000 |
| O | O7  | 1.0 | 0.72231 | 0.65751 | 0.05702 | 1.0000 |
| O | O8  | 1.0 | 0.84913 | 0.82967 | 0.05653 | 1.0000 |
| O | O9  | 1.0 | 0.66763 | 0.82972 | 0.10948 | 1.0000 |
| O | O10 | 1.0 | 0.83635 | 0.48423 | 0.05319 | 1.0000 |
| O | O11 | 1.0 | 0.65073 | 0.47804 | 0.09964 | 1.0000 |
| O | O12 | 1.0 | 0.96708 | 0.65699 | 0.05320 | 1.0000 |
| O | O13 | 1.0 | 0.04863 | 0.83473 | 0.09318 | 1.0000 |
| O | O14 | 1.0 | 0.01828 | 0.47867 | 0.09943 | 1.0000 |
| O | O15 | 1.0 | 0.62569 | 0.32831 | 0.55122 | 1.0000 |
| O | O16 | 1.0 | 0.67543 | 0.16746 | 0.48947 | 1.0000 |
| O | O17 | 1.0 | 0.73752 | 0.16119 | 0.58630 | 1.0000 |
| O | O18 | 1.0 | 0.53409 | 0.13647 | 0.56047 | 1.0000 |
| O | O19 | 1.0 | 0.67502 | 0.51052 | 0.50458 | 1.0000 |
| O | O20 | 1.0 | 0.76893 | 0.45912 | 0.59103 | 1.0000 |
| O | O21 | 1.0 | 0.56361 | 0.51470 | 0.58721 | 1.0000 |
| O | O22 | 1.0 | 0.28179 | 0.33748 | 0.56031 | 1.0000 |
| O | O23 | 1.0 | 0.14997 | 0.16904 | 0.55453 | 1.0000 |
| O | O24 | 1.0 | 0.33161 | 0.15665 | 0.60534 | 1.0000 |
| O | O25 | 1.0 | 0.16974 | 0.51203 | 0.55370 | 1.0000 |
| O | O26 | 1.0 | 0.35412 | 0.51872 | 0.60051 | 1.0000 |
| O | O27 | 1.0 | 0.03404 | 0.34337 | 0.55404 | 1.0000 |
| O | O28 | 1.0 | 0.95114 | 0.16411 | 0.59188 | 1.0000 |
| O | O29 | 1.0 | 0.98811 | 0.52450 | 0.60103 | 1.0000 |
| O | O30 | 1.0 | 0.33404 | 0.37855 | 0.30968 | 1.0000 |
| O | O31 | 1.0 | 0.17404 | 0.34254 | 0.24350 | 1.0000 |
| O | O32 | 1.0 | 0.18194 | 0.23536 | 0.32944 | 1.0000 |
| O | O33 | 1.0 | 0.13960 | 0.44454 | 0.32779 | 1.0000 |
| O | O34 | 1.0 | 0.49916 | 0.34680 | 0.24867 | 1.0000 |
| O | O35 | 1.0 | 0.46997 | 0.22563 | 0.33096 | 1.0000 |
| O | O36 | 1.0 | 0.53181 | 0.42788 | 0.33837 | 1.0000 |
| O | O37 | 1.0 | 0.34800 | 0.70382 | 0.30878 | 1.0000 |

|   |     |     |         |         |         |        |
|---|-----|-----|---------|---------|---------|--------|
| O | O38 | 1.0 | 0.18705 | 0.83670 | 0.32600 | 1.0000 |
| O | O39 | 1.0 | 0.18055 | 0.64166 | 0.35965 | 1.0000 |
| O | O40 | 1.0 | 0.51112 | 0.83707 | 0.31621 | 1.0000 |
| O | O41 | 1.0 | 0.53459 | 0.64094 | 0.34322 | 1.0000 |
| O | O42 | 1.0 | 0.34824 | 0.97496 | 0.31390 | 1.0000 |
| O | O43 | 1.0 | 0.16177 | 0.03352 | 0.35208 | 1.0000 |
| O | O44 | 1.0 | 0.53698 | 0.03021 | 0.34780 | 1.0000 |
| O | O45 | 1.0 | 0.66738 | 0.61778 | 0.80627 | 1.0000 |
| O | O46 | 1.0 | 0.82539 | 0.65120 | 0.73826 | 1.0000 |
| O | O47 | 1.0 | 0.81328 | 0.77327 | 0.82012 | 1.0000 |
| O | O48 | 1.0 | 0.86394 | 0.56424 | 0.82578 | 1.0000 |
| O | O49 | 1.0 | 0.49764 | 0.65826 | 0.75086 | 1.0000 |
| O | O50 | 1.0 | 0.53933 | 0.77564 | 0.83338 | 1.0000 |
| O | O51 | 1.0 | 0.47097 | 0.57574 | 0.84077 | 1.0000 |
| O | O52 | 1.0 | 0.65297 | 0.29691 | 0.80801 | 1.0000 |
| O | O53 | 1.0 | 0.81835 | 0.17132 | 0.82279 | 1.0000 |
| O | O54 | 1.0 | 0.81949 | 0.36731 | 0.85766 | 1.0000 |
| O | O55 | 1.0 | 0.49288 | 0.16323 | 0.82102 | 1.0000 |
| O | O56 | 1.0 | 0.46537 | 0.36404 | 0.84038 | 1.0000 |
| O | O57 | 1.0 | 0.65708 | 0.02757 | 0.81611 | 1.0000 |
| O | O58 | 1.0 | 0.46960 | 0.96914 | 0.85119 | 1.0000 |
| O | O59 | 1.0 | 0.62111 | 0.66542 | 0.94359 | 1.0000 |
| O | O60 | 1.0 | 0.65407 | 0.82637 | 0.01058 | 1.0000 |
| O | O61 | 1.0 | 0.76333 | 0.82174 | 0.92440 | 1.0000 |
| O | O62 | 1.0 | 0.55416 | 0.85938 | 0.92640 | 1.0000 |
| O | O63 | 1.0 | 0.65984 | 0.49486 | 0.99964 | 1.0000 |
| O | O64 | 1.0 | 0.77822 | 0.53663 | 0.91732 | 1.0000 |
| O | O65 | 1.0 | 0.57917 | 0.46833 | 0.90929 | 1.0000 |
| O | O66 | 1.0 | 0.29363 | 0.64931 | 0.94284 | 1.0000 |
| O | O67 | 1.0 | 0.17186 | 0.81949 | 0.92744 | 1.0000 |
| O | O68 | 1.0 | 0.36378 | 0.81054 | 0.88972 | 1.0000 |
| O | O69 | 1.0 | 0.16624 | 0.48220 | 0.93185 | 1.0000 |
| O | O70 | 1.0 | 0.36709 | 0.46364 | 0.91056 | 1.0000 |
| O | O71 | 1.0 | 0.03986 | 0.65365 | 0.93760 | 1.0000 |



|   |      |     |         |         |         |        |
|---|------|-----|---------|---------|---------|--------|
| O | O72  | 1.0 | 0.97862 | 0.83584 | 0.89520 | 1.0000 |
| O | O73  | 1.0 | 0.97401 | 0.47120 | 0.89886 | 1.0000 |
| O | O74  | 1.0 | 0.36945 | 0.33104 | 0.43836 | 1.0000 |
| O | O75  | 1.0 | 0.34247 | 0.17249 | 0.50663 | 1.0000 |
| O | O76  | 1.0 | 0.23166 | 0.17102 | 0.42221 | 1.0000 |
| O | O77  | 1.0 | 0.44304 | 0.13862 | 0.42196 | 1.0000 |
| O | O78  | 1.0 | 0.34777 | 0.49530 | 0.50097 | 1.0000 |
| O | O79  | 1.0 | 0.22217 | 0.47452 | 0.41976 | 1.0000 |
| O | O80  | 1.0 | 0.42629 | 0.52816 | 0.41073 | 1.0000 |
| O | O81  | 1.0 | 0.70968 | 0.34982 | 0.44266 | 1.0000 |
| O | O82  | 1.0 | 0.83449 | 0.18373 | 0.42365 | 1.0000 |
| O | O83  | 1.0 | 0.63858 | 0.18694 | 0.39023 | 1.0000 |
| O | O84  | 1.0 | 0.83489 | 0.51955 | 0.43710 | 1.0000 |
| O | O85  | 1.0 | 0.63919 | 0.53457 | 0.40781 | 1.0000 |
| O | O86  | 1.0 | 0.96466 | 0.35045 | 0.43708 | 1.0000 |
| O | O87  | 1.0 | 0.03176 | 0.17077 | 0.39479 | 1.0000 |
| O | O88  | 1.0 | 0.02583 | 0.53558 | 0.40067 | 1.0000 |
| O | O89  | 1.0 | 0.66780 | 0.37062 | 0.69724 | 1.0000 |
| O | O90  | 1.0 | 0.83181 | 0.32940 | 0.75769 | 1.0000 |
| O | O91  | 1.0 | 0.83640 | 0.26070 | 0.66220 | 1.0000 |
| O | O92  | 1.0 | 0.49159 | 0.30400 | 0.74537 | 1.0000 |
| O | O93  | 1.0 | 0.53080 | 0.24175 | 0.65137 | 1.0000 |
| O | O94  | 1.0 | 0.47838 | 0.44396 | 0.67320 | 1.0000 |
| O | O95  | 1.0 | 0.65743 | 0.72119 | 0.69141 | 1.0000 |
| O | O96  | 1.0 | 0.82995 | 0.84705 | 0.69239 | 1.0000 |
| O | O97  | 1.0 | 0.82949 | 0.66548 | 0.63925 | 1.0000 |
| O | O98  | 1.0 | 0.48580 | 0.83612 | 0.69814 | 1.0000 |
| O | O99  | 1.0 | 0.47542 | 0.65012 | 0.65145 | 1.0000 |
| O | O100 | 1.0 | 0.65836 | 0.96724 | 0.69523 | 1.0000 |
| O | O101 | 1.0 | 0.83680 | 0.04716 | 0.65524 | 1.0000 |
| O | O102 | 1.0 | 0.47796 | 0.01787 | 0.65127 | 1.0000 |
| O | O103 | 1.0 | 0.32968 | 0.62763 | 0.19936 | 1.0000 |
| O | O104 | 1.0 | 0.16753 | 0.67857 | 0.25976 | 1.0000 |
| O | O105 | 1.0 | 0.16489 | 0.74033 | 0.16275 | 1.0000 |

|    |      |     |         |         |         |        |
|----|------|-----|---------|---------|---------|--------|
| O  | O106 | 1.0 | 0.50998 | 0.68091 | 0.24648 | 1.0000 |
| O  | O107 | 1.0 | 0.46327 | 0.76547 | 0.15739 | 1.0000 |
| O  | O108 | 1.0 | 0.51636 | 0.55926 | 0.16706 | 1.0000 |
| O  | O109 | 1.0 | 0.33969 | 0.28263 | 0.19028 | 1.0000 |
| O  | O110 | 1.0 | 0.17106 | 0.15104 | 0.19491 | 1.0000 |
| O  | O111 | 1.0 | 0.16014 | 0.33380 | 0.14459 | 1.0000 |
| O  | O112 | 1.0 | 0.51219 | 0.16743 | 0.19673 | 1.0000 |
| O  | O113 | 1.0 | 0.52169 | 0.35131 | 0.14918 | 1.0000 |
| O  | O114 | 1.0 | 0.34363 | 0.03261 | 0.19360 | 1.0000 |
| O  | O115 | 1.0 | 0.16385 | 0.95342 | 0.15534 | 1.0000 |
| O  | O116 | 1.0 | 0.52618 | 0.98638 | 0.14849 | 1.0000 |
| O  | O117 | 1.0 | 0.01601 | 0.82477 | 0.99510 | 1.0000 |
| O  | O118 | 1.0 | 0.01053 | 0.48666 | 0.99840 | 1.0000 |
| O  | O119 | 1.0 | 0.98433 | 0.17842 | 0.49378 | 1.0000 |
| O  | O120 | 1.0 | 0.99506 | 0.51464 | 0.50017 | 1.0000 |
| O  | O121 | 1.0 | 0.17980 | 0.98191 | 0.25379 | 1.0000 |
| O  | O122 | 1.0 | 0.51130 | 0.99041 | 0.24909 | 1.0000 |
| O  | O123 | 1.0 | 0.82424 | 0.01538 | 0.75333 | 1.0000 |
| O  | O124 | 1.0 | 0.49353 | 0.01192 | 0.75216 | 1.0000 |
| O  | O125 | 1.0 | 0.85638 | 0.46800 | 0.68626 | 1.0000 |
| O  | O126 | 1.0 | 0.46936 | 0.85722 | 0.06270 | 1.0000 |
| O  | O127 | 1.0 | 0.13772 | 0.53700 | 0.18906 | 1.0000 |
| O  | O128 | 1.0 | 0.84718 | 0.98142 | 0.85331 | 1.0000 |
| Al | Al1  | 1.0 | 0.46096 | 0.13830 | 0.62359 | 1.0000 |
| Al | Al2  | 1.0 | 0.86129 | 0.53675 | 0.62279 | 1.0000 |
| Al | Al3  | 1.0 | 0.53890 | 0.85985 | 0.12590 | 1.0000 |
| Al | Al4  | 1.0 | 0.13946 | 0.46301 | 0.12610 | 1.0000 |
| Al | Al5  | 1.0 | 0.84979 | 0.83811 | 0.87491 | 1.0000 |
| Si | Si1  | 1.0 | 0.34027 | 0.54199 | 0.05996 | 1.0000 |
| Si | Si2  | 1.0 | 0.72617 | 0.78653 | 0.06010 | 1.0000 |
| Si | Si3  | 1.0 | 0.71696 | 0.52889 | 0.05286 | 1.0000 |
| Si | Si4  | 1.0 | 0.96989 | 0.78551 | 0.04960 | 1.0000 |
| Si | Si5  | 1.0 | 0.95911 | 0.52689 | 0.05196 | 1.0000 |
| Si | Si6  | 1.0 | 0.64985 | 0.20306 | 0.54710 | 1.0000 |

|    |      |     |         |         |         |        |
|----|------|-----|---------|---------|---------|--------|
| Si | Si7  | 1.0 | 0.66070 | 0.45426 | 0.55955 | 1.0000 |
| Si | Si8  | 1.0 | 0.27390 | 0.20850 | 0.55820 | 1.0000 |
| Si | Si9  | 1.0 | 0.28846 | 0.46576 | 0.55425 | 1.0000 |
| Si | Si10 | 1.0 | 0.03022 | 0.21512 | 0.54880 | 1.0000 |
| Si | Si11 | 1.0 | 0.04577 | 0.47355 | 0.55320 | 1.0000 |
| Si | Si12 | 1.0 | 0.20830 | 0.34867 | 0.30300 | 1.0000 |
| Si | Si13 | 1.0 | 0.45894 | 0.34421 | 0.30678 | 1.0000 |
| Si | Si14 | 1.0 | 0.22104 | 0.71561 | 0.31355 | 1.0000 |
| Si | Si15 | 1.0 | 0.47593 | 0.71575 | 0.30314 | 1.0000 |
| Si | Si16 | 1.0 | 0.22011 | 0.95801 | 0.31084 | 1.0000 |
| Si | Si17 | 1.0 | 0.47560 | 0.95827 | 0.30570 | 1.0000 |
| Si | Si18 | 1.0 | 0.14359 | 0.52360 | 0.37714 | 1.0000 |
| Si | Si19 | 1.0 | 0.79205 | 0.65528 | 0.79891 | 1.0000 |
| Si | Si20 | 1.0 | 0.54405 | 0.65720 | 0.80790 | 1.0000 |
| Si | Si21 | 1.0 | 0.78010 | 0.29314 | 0.81172 | 1.0000 |
| Si | Si22 | 1.0 | 0.52501 | 0.28281 | 0.80332 | 1.0000 |
| Si | Si23 | 1.0 | 0.52777 | 0.04219 | 0.80912 | 1.0000 |
| Si | Si24 | 1.0 | 0.85765 | 0.48628 | 0.87505 | 1.0000 |
| Si | Si25 | 1.0 | 0.65226 | 0.79233 | 0.95021 | 1.0000 |
| Si | Si26 | 1.0 | 0.65973 | 0.54178 | 0.94268 | 1.0000 |
| Si | Si27 | 1.0 | 0.29004 | 0.77700 | 0.93743 | 1.0000 |
| Si | Si28 | 1.0 | 0.28451 | 0.52110 | 0.94805 | 1.0000 |
| Si | Si29 | 1.0 | 0.04898 | 0.78338 | 0.93856 | 1.0000 |
| Si | Si30 | 1.0 | 0.04721 | 0.52524 | 0.94266 | 1.0000 |
| Si | Si31 | 1.0 | 0.48236 | 0.85174 | 0.87540 | 1.0000 |
| Si | Si32 | 1.0 | 0.34510 | 0.20436 | 0.44662 | 1.0000 |
| Si | Si33 | 1.0 | 0.34096 | 0.45758 | 0.44244 | 1.0000 |
| Si | Si34 | 1.0 | 0.71494 | 0.22229 | 0.43621 | 1.0000 |
| Si | Si35 | 1.0 | 0.71466 | 0.47851 | 0.44828 | 1.0000 |
| Si | Si36 | 1.0 | 0.95506 | 0.22149 | 0.43771 | 1.0000 |
| Si | Si37 | 1.0 | 0.95528 | 0.47886 | 0.44462 | 1.0000 |
| Si | Si38 | 1.0 | 0.52181 | 0.14665 | 0.37257 | 1.0000 |
| Si | Si39 | 1.0 | 0.54101 | 0.33811 | 0.69068 | 1.0000 |
| Si | Si40 | 1.0 | 0.78610 | 0.72357 | 0.68870 | 1.0000 |

|    |      |     |         |         |         |        |
|----|------|-----|---------|---------|---------|--------|
| Si | Si41 | 1.0 | 0.52927 | 0.71585 | 0.69762 | 1.0000 |
| Si | Si42 | 1.0 | 0.78619 | 0.96786 | 0.69800 | 1.0000 |
| Si | Si43 | 1.0 | 0.52843 | 0.95887 | 0.69810 | 1.0000 |
| Si | Si44 | 1.0 | 0.45598 | 0.66066 | 0.19135 | 1.0000 |
| Si | Si45 | 1.0 | 0.21093 | 0.27517 | 0.19169 | 1.0000 |
| Si | Si46 | 1.0 | 0.46783 | 0.28707 | 0.19569 | 1.0000 |
| Si | Si47 | 1.0 | 0.21574 | 0.03014 | 0.19898 | 1.0000 |
| Si | Si48 | 1.0 | 0.47330 | 0.04333 | 0.19594 | 1.0000 |
| Si | Si49 | 1.0 | 0.15946 | 0.84185 | 0.12406 | 1.0000 |
| Si | Si50 | 1.0 | 0.53239 | 0.46854 | 0.12393 | 1.0000 |
| Si | Si51 | 1.0 | 0.84089 | 0.15817 | 0.62368 | 1.0000 |
| Si | Si52 | 1.0 | 0.46853 | 0.53060 | 0.62792 | 1.0000 |
| Si | Si53 | 1.0 | 0.15186 | 0.15292 | 0.37462 | 1.0000 |
| Si | Si54 | 1.0 | 0.53189 | 0.53209 | 0.37504 | 1.0000 |
| Si | Si55 | 1.0 | 0.47157 | 0.46923 | 0.87552 | 1.0000 |
| Si | Si56 | 1.0 | 0.79382 | 0.35140 | 0.70017 | 1.0000 |
| Si | Si57 | 1.0 | 0.35308 | 0.79452 | 0.04804 | 1.0000 |
| Si | Si58 | 1.0 | 0.20476 | 0.65272 | 0.20230 | 1.0000 |
| Si | Si59 | 1.0 | 0.78166 | 0.05101 | 0.80818 | 1.0000 |

T7T7T7T9T9:

data\_image0

\_chemical\_formula\_structural H5O128Al5Si59  
\_chemical\_formula\_sum "H5 O128 Al5 Si59"  
\_cell\_length\_a 12.5309  
\_cell\_length\_b 12.5552  
\_cell\_length\_c 26.483  
\_cell\_angle\_alpha 89.9621  
\_cell\_angle\_beta 89.9914  
\_cell\_angle\_gamma 90.555

\_space\_group\_name\_H-M\_alt "P 1"  
\_space\_group\_IT\_number 1

loop\_

\_space\_group\_symop\_operation\_xyz  
'x, y, z'

loop\_

\_atom\_site\_type\_symbol  
\_atom\_site\_label  
\_atom\_site\_symmetry\_multiplicity  
\_atom\_site\_fract\_x  
\_atom\_site\_fract\_y  
\_atom\_site\_fract\_z  
\_atom\_site\_occupancy  
H H1 1.0 0.47519 0.14590 0.53537 1.0000  
H H2 1.0 0.85523 0.52624 0.71137 1.0000  
H H3 1.0 0.52820 0.83897 0.03891 1.0000  
H H4 1.0 0.90383 0.02218 0.87144 1.0000  
H H5 1.0 0.06408 0.98065 0.35753 1.0000  
O O1 1.0 0.33185 0.66979 0.06151 1.0000  
O O2 1.0 0.34820 0.82004 0.98966 1.0000  
O O3 1.0 0.26385 0.86398 0.08064 1.0000

;

|   |     |     |         |         |         |        |
|---|-----|-----|---------|---------|---------|--------|
| O | O4  | 1.0 | 0.33185 | 0.49514 | 0.00394 | 1.0000 |
| O | O5  | 1.0 | 0.26635 | 0.48070 | 0.09761 | 1.0000 |
| O | O6  | 1.0 | 0.46939 | 0.51474 | 0.07827 | 1.0000 |
| O | O7  | 1.0 | 0.72680 | 0.65399 | 0.06253 | 1.0000 |
| O | O8  | 1.0 | 0.85433 | 0.82294 | 0.05761 | 1.0000 |
| O | O9  | 1.0 | 0.67235 | 0.83215 | 0.11086 | 1.0000 |
| O | O10 | 1.0 | 0.85148 | 0.48460 | 0.06606 | 1.0000 |
| O | O11 | 1.0 | 0.66249 | 0.47101 | 0.10405 | 1.0000 |
| O | O12 | 1.0 | 0.98141 | 0.65333 | 0.05442 | 1.0000 |
| O | O13 | 1.0 | 0.05341 | 0.83122 | 0.09363 | 1.0000 |
| O | O14 | 1.0 | 0.05718 | 0.46601 | 0.08165 | 1.0000 |
| O | O15 | 1.0 | 0.62558 | 0.32982 | 0.55240 | 1.0000 |
| O | O16 | 1.0 | 0.67196 | 0.17024 | 0.48955 | 1.0000 |
| O | O17 | 1.0 | 0.73894 | 0.16099 | 0.58517 | 1.0000 |
| O | O18 | 1.0 | 0.53237 | 0.14024 | 0.56187 | 1.0000 |
| O | O19 | 1.0 | 0.66880 | 0.50583 | 0.50005 | 1.0000 |
| O | O20 | 1.0 | 0.76771 | 0.46677 | 0.58738 | 1.0000 |
| O | O21 | 1.0 | 0.56055 | 0.51843 | 0.58417 | 1.0000 |
| O | O22 | 1.0 | 0.28098 | 0.33948 | 0.56832 | 1.0000 |
| O | O23 | 1.0 | 0.15098 | 0.17169 | 0.55583 | 1.0000 |
| O | O24 | 1.0 | 0.33178 | 0.15555 | 0.60918 | 1.0000 |
| O | O25 | 1.0 | 0.16718 | 0.51021 | 0.55008 | 1.0000 |
| O | O26 | 1.0 | 0.35055 | 0.52780 | 0.59970 | 1.0000 |
| O | O27 | 1.0 | 0.03083 | 0.34371 | 0.55721 | 1.0000 |
| O | O28 | 1.0 | 0.95412 | 0.16323 | 0.59621 | 1.0000 |
| O | O29 | 1.0 | 0.98954 | 0.52752 | 0.60213 | 1.0000 |
| O | O30 | 1.0 | 0.33856 | 0.38349 | 0.31002 | 1.0000 |
| O | O31 | 1.0 | 0.17238 | 0.33975 | 0.25016 | 1.0000 |
| O | O32 | 1.0 | 0.20493 | 0.22195 | 0.33109 | 1.0000 |
| O | O33 | 1.0 | 0.14206 | 0.42538 | 0.33933 | 1.0000 |
| O | O34 | 1.0 | 0.49547 | 0.34557 | 0.24415 | 1.0000 |
| O | O35 | 1.0 | 0.48621 | 0.23860 | 0.33085 | 1.0000 |
| O | O36 | 1.0 | 0.53762 | 0.44656 | 0.32758 | 1.0000 |
| O | O37 | 1.0 | 0.32613 | 0.71697 | 0.30402 | 1.0000 |

|   |     |     |         |         |         |        |
|---|-----|-----|---------|---------|---------|--------|
| O | O38 | 1.0 | 0.15045 | 0.82801 | 0.30907 | 1.0000 |
| O | O39 | 1.0 | 0.15438 | 0.63733 | 0.34804 | 1.0000 |
| O | O40 | 1.0 | 0.49406 | 0.84073 | 0.31451 | 1.0000 |
| O | O41 | 1.0 | 0.49573 | 0.64804 | 0.35364 | 1.0000 |
| O | O42 | 1.0 | 0.32103 | 0.96442 | 0.31112 | 1.0000 |
| O | O43 | 1.0 | 0.49719 | 0.03381 | 0.35318 | 1.0000 |
| O | O44 | 1.0 | 0.67201 | 0.62026 | 0.80558 | 1.0000 |
| O | O45 | 1.0 | 0.82993 | 0.65410 | 0.73734 | 1.0000 |
| O | O46 | 1.0 | 0.82004 | 0.77166 | 0.82117 | 1.0000 |
| O | O47 | 1.0 | 0.86675 | 0.56109 | 0.82285 | 1.0000 |
| O | O48 | 1.0 | 0.49807 | 0.65491 | 0.75194 | 1.0000 |
| O | O49 | 1.0 | 0.54250 | 0.77752 | 0.83224 | 1.0000 |
| O | O50 | 1.0 | 0.48137 | 0.57719 | 0.84474 | 1.0000 |
| O | O51 | 1.0 | 0.65893 | 0.28855 | 0.80583 | 1.0000 |
| O | O52 | 1.0 | 0.82893 | 0.16978 | 0.82057 | 1.0000 |
| O | O53 | 1.0 | 0.82534 | 0.36401 | 0.85620 | 1.0000 |
| O | O54 | 1.0 | 0.49179 | 0.16515 | 0.81972 | 1.0000 |
| O | O55 | 1.0 | 0.47977 | 0.36528 | 0.84300 | 1.0000 |
| O | O56 | 1.0 | 0.66026 | 0.03418 | 0.81486 | 1.0000 |
| O | O57 | 1.0 | 0.47866 | 0.97205 | 0.85382 | 1.0000 |
| O | O58 | 1.0 | 0.63205 | 0.65984 | 0.94748 | 1.0000 |
| O | O59 | 1.0 | 0.65851 | 0.82083 | 0.01236 | 1.0000 |
| O | O60 | 1.0 | 0.77103 | 0.81706 | 0.92630 | 1.0000 |
| O | O61 | 1.0 | 0.56098 | 0.85247 | 0.92673 | 1.0000 |
| O | O62 | 1.0 | 0.68572 | 0.49015 | 0.00281 | 1.0000 |
| O | O63 | 1.0 | 0.78447 | 0.53040 | 0.91529 | 1.0000 |
| O | O64 | 1.0 | 0.58048 | 0.46619 | 0.91696 | 1.0000 |
| O | O65 | 1.0 | 0.29486 | 0.64793 | 0.93829 | 1.0000 |
| O | O66 | 1.0 | 0.17875 | 0.82384 | 0.93017 | 1.0000 |
| O | O67 | 1.0 | 0.36891 | 0.81307 | 0.88924 | 1.0000 |
| O | O68 | 1.0 | 0.16837 | 0.47891 | 0.93969 | 1.0000 |
| O | O69 | 1.0 | 0.36663 | 0.46075 | 0.90820 | 1.0000 |
| O | O70 | 1.0 | 0.04932 | 0.65538 | 0.93417 | 1.0000 |
| O | O71 | 1.0 | 0.98489 | 0.84016 | 0.89550 | 1.0000 |

|   |      |     |         |         |         |        |
|---|------|-----|---------|---------|---------|--------|
| O | O72  | 1.0 | 0.98505 | 0.47392 | 0.89211 | 1.0000 |
| O | O73  | 1.0 | 0.30766 | 0.32501 | 0.43933 | 1.0000 |
| O | O74  | 1.0 | 0.34751 | 0.17988 | 0.51140 | 1.0000 |
| O | O75  | 1.0 | 0.24575 | 0.12382 | 0.42665 | 1.0000 |
| O | O76  | 1.0 | 0.45360 | 0.17433 | 0.42661 | 1.0000 |
| O | O77  | 1.0 | 0.35118 | 0.48478 | 0.50242 | 1.0000 |
| O | O78  | 1.0 | 0.23125 | 0.51564 | 0.42077 | 1.0000 |
| O | O79  | 1.0 | 0.44001 | 0.48480 | 0.41362 | 1.0000 |
| O | O80  | 1.0 | 0.67796 | 0.34654 | 0.43443 | 1.0000 |
| O | O81  | 1.0 | 0.83217 | 0.20016 | 0.42639 | 1.0000 |
| O | O82  | 1.0 | 0.64428 | 0.16204 | 0.38903 | 1.0000 |
| O | O83  | 1.0 | 0.83055 | 0.49548 | 0.43437 | 1.0000 |
| O | O84  | 1.0 | 0.64142 | 0.54336 | 0.40247 | 1.0000 |
| O | O85  | 1.0 | 0.98360 | 0.34712 | 0.44023 | 1.0000 |
| O | O86  | 1.0 | 0.02668 | 0.15868 | 0.40016 | 1.0000 |
| O | O87  | 1.0 | 0.02332 | 0.53690 | 0.40404 | 1.0000 |
| O | O88  | 1.0 | 0.66670 | 0.37590 | 0.69773 | 1.0000 |
| O | O89  | 1.0 | 0.83557 | 0.33188 | 0.75627 | 1.0000 |
| O | O90  | 1.0 | 0.83199 | 0.26343 | 0.66126 | 1.0000 |
| O | O91  | 1.0 | 0.49142 | 0.31380 | 0.74670 | 1.0000 |
| O | O92  | 1.0 | 0.53380 | 0.23741 | 0.65536 | 1.0000 |
| O | O93  | 1.0 | 0.47599 | 0.44138 | 0.66930 | 1.0000 |
| O | O94  | 1.0 | 0.65804 | 0.72217 | 0.69326 | 1.0000 |
| O | O95  | 1.0 | 0.83177 | 0.84760 | 0.69076 | 1.0000 |
| O | O96  | 1.0 | 0.82690 | 0.66801 | 0.63791 | 1.0000 |
| O | O97  | 1.0 | 0.48433 | 0.83421 | 0.70020 | 1.0000 |
| O | O98  | 1.0 | 0.47773 | 0.64940 | 0.65218 | 1.0000 |
| O | O99  | 1.0 | 0.65844 | 0.96412 | 0.69953 | 1.0000 |
| O | O100 | 1.0 | 0.83235 | 0.04984 | 0.65710 | 1.0000 |
| O | O101 | 1.0 | 0.48117 | 0.01523 | 0.65214 | 1.0000 |
| O | O102 | 1.0 | 0.33107 | 0.61806 | 0.19352 | 1.0000 |
| O | O103 | 1.0 | 0.15884 | 0.66126 | 0.24826 | 1.0000 |
| O | O104 | 1.0 | 0.19542 | 0.77204 | 0.16468 | 1.0000 |
| O | O105 | 1.0 | 0.13372 | 0.56930 | 0.16131 | 1.0000 |



|    |      |     |         |         |         |        |
|----|------|-----|---------|---------|---------|--------|
| O  | O106 | 1.0 | 0.49855 | 0.66843 | 0.25360 | 1.0000 |
| O  | O107 | 1.0 | 0.47460 | 0.75808 | 0.16302 | 1.0000 |
| O  | O108 | 1.0 | 0.52903 | 0.55401 | 0.17323 | 1.0000 |
| O  | O109 | 1.0 | 0.32931 | 0.29373 | 0.18656 | 1.0000 |
| O  | O110 | 1.0 | 0.16044 | 0.16527 | 0.19066 | 1.0000 |
| O  | O111 | 1.0 | 0.14113 | 0.35564 | 0.15276 | 1.0000 |
| O  | O112 | 1.0 | 0.49939 | 0.16953 | 0.18971 | 1.0000 |
| O  | O113 | 1.0 | 0.50932 | 0.35421 | 0.14357 | 1.0000 |
| O  | O114 | 1.0 | 0.33132 | 0.03804 | 0.19113 | 1.0000 |
| O  | O115 | 1.0 | 0.15253 | 0.97546 | 0.14702 | 1.0000 |
| O  | O116 | 1.0 | 0.51875 | 0.97817 | 0.15330 | 1.0000 |
| O  | O117 | 1.0 | 0.01943 | 0.82061 | 0.99515 | 1.0000 |
| O  | O118 | 1.0 | 0.98541 | 0.49105 | 0.98999 | 1.0000 |
| O  | O119 | 1.0 | 0.97700 | 0.17743 | 0.49852 | 1.0000 |
| O  | O120 | 1.0 | 0.98301 | 0.51351 | 0.50236 | 1.0000 |
| O  | O121 | 1.0 | 0.15957 | 0.99295 | 0.24657 | 1.0000 |
| O  | O122 | 1.0 | 0.49146 | 0.00702 | 0.25315 | 1.0000 |
| O  | O123 | 1.0 | 0.82956 | 0.00928 | 0.75450 | 1.0000 |
| O  | O124 | 1.0 | 0.49096 | 0.00937 | 0.75380 | 1.0000 |
| O  | O125 | 1.0 | 0.85472 | 0.47032 | 0.68429 | 1.0000 |
| O  | O126 | 1.0 | 0.47272 | 0.83869 | 0.06625 | 1.0000 |
| O  | O127 | 1.0 | 0.84700 | 0.98099 | 0.85507 | 1.0000 |
| O  | O128 | 1.0 | 0.13102 | 0.01368 | 0.34656 | 1.0000 |
| Al | Al1  | 1.0 | 0.46312 | 0.13710 | 0.62558 | 1.0000 |
| Al | Al2  | 1.0 | 0.86006 | 0.54027 | 0.62085 | 1.0000 |
| Al | Al3  | 1.0 | 0.54249 | 0.85413 | 0.12988 | 1.0000 |
| Al | Al4  | 1.0 | 0.85450 | 0.83726 | 0.87579 | 1.0000 |
| Al | Al5  | 1.0 | 0.15478 | 0.14421 | 0.37901 | 1.0000 |
| Si | Si1  | 1.0 | 0.34935 | 0.54033 | 0.06042 | 1.0000 |
| Si | Si2  | 1.0 | 0.73038 | 0.78336 | 0.06261 | 1.0000 |
| Si | Si3  | 1.0 | 0.73003 | 0.52542 | 0.05861 | 1.0000 |
| Si | Si4  | 1.0 | 0.97623 | 0.78207 | 0.05004 | 1.0000 |
| Si | Si5  | 1.0 | 0.96845 | 0.52535 | 0.04837 | 1.0000 |
| Si | Si6  | 1.0 | 0.64840 | 0.20446 | 0.54719 | 1.0000 |

|    |      |     |         |         |         |        |
|----|------|-----|---------|---------|---------|--------|
| Si | Si7  | 1.0 | 0.65795 | 0.45682 | 0.55679 | 1.0000 |
| Si | Si8  | 1.0 | 0.27471 | 0.21102 | 0.56234 | 1.0000 |
| Si | Si9  | 1.0 | 0.28690 | 0.46538 | 0.55529 | 1.0000 |
| Si | Si10 | 1.0 | 0.02912 | 0.21548 | 0.55184 | 1.0000 |
| Si | Si11 | 1.0 | 0.04248 | 0.47351 | 0.55384 | 1.0000 |
| Si | Si12 | 1.0 | 0.21452 | 0.34012 | 0.30851 | 1.0000 |
| Si | Si13 | 1.0 | 0.46396 | 0.35241 | 0.30345 | 1.0000 |
| Si | Si14 | 1.0 | 0.19809 | 0.70794 | 0.30224 | 1.0000 |
| Si | Si15 | 1.0 | 0.45518 | 0.71790 | 0.30625 | 1.0000 |
| Si | Si16 | 1.0 | 0.45206 | 0.96176 | 0.30721 | 1.0000 |
| Si | Si17 | 1.0 | 0.13910 | 0.52581 | 0.37786 | 1.0000 |
| Si | Si18 | 1.0 | 0.79682 | 0.65624 | 0.79772 | 1.0000 |
| Si | Si19 | 1.0 | 0.54801 | 0.65768 | 0.80846 | 1.0000 |
| Si | Si20 | 1.0 | 0.78661 | 0.29062 | 0.80986 | 1.0000 |
| Si | Si21 | 1.0 | 0.52961 | 0.28391 | 0.80316 | 1.0000 |
| Si | Si22 | 1.0 | 0.52973 | 0.04437 | 0.80941 | 1.0000 |
| Si | Si23 | 1.0 | 0.86354 | 0.48346 | 0.87199 | 1.0000 |
| Si | Si24 | 1.0 | 0.65964 | 0.78731 | 0.95197 | 1.0000 |
| Si | Si25 | 1.0 | 0.67131 | 0.53651 | 0.94586 | 1.0000 |
| Si | Si26 | 1.0 | 0.29679 | 0.77611 | 0.93665 | 1.0000 |
| Si | Si27 | 1.0 | 0.28994 | 0.52092 | 0.94744 | 1.0000 |
| Si | Si28 | 1.0 | 0.05548 | 0.78501 | 0.93834 | 1.0000 |
| Si | Si29 | 1.0 | 0.04845 | 0.52688 | 0.93929 | 1.0000 |
| Si | Si30 | 1.0 | 0.48885 | 0.85212 | 0.87558 | 1.0000 |
| Si | Si31 | 1.0 | 0.33610 | 0.19984 | 0.44992 | 1.0000 |
| Si | Si32 | 1.0 | 0.33262 | 0.45250 | 0.44372 | 1.0000 |
| Si | Si33 | 1.0 | 0.70731 | 0.22086 | 0.43483 | 1.0000 |
| Si | Si34 | 1.0 | 0.70527 | 0.47236 | 0.44348 | 1.0000 |
| Si | Si35 | 1.0 | 0.95652 | 0.22003 | 0.44098 | 1.0000 |
| Si | Si36 | 1.0 | 0.95462 | 0.47222 | 0.44600 | 1.0000 |
| Si | Si37 | 1.0 | 0.51857 | 0.15342 | 0.37426 | 1.0000 |
| Si | Si38 | 1.0 | 0.54051 | 0.33979 | 0.69085 | 1.0000 |
| Si | Si39 | 1.0 | 0.78678 | 0.72509 | 0.68790 | 1.0000 |
| Si | Si40 | 1.0 | 0.52946 | 0.71434 | 0.69880 | 1.0000 |

|    |      |     |         |         |         |        |
|----|------|-----|---------|---------|---------|--------|
| Si | Si41 | 1.0 | 0.78671 | 0.96696 | 0.69912 | 1.0000 |
| Si | Si42 | 1.0 | 0.52808 | 0.95644 | 0.70011 | 1.0000 |
| Si | Si43 | 1.0 | 0.20703 | 0.65563 | 0.19132 | 1.0000 |
| Si | Si44 | 1.0 | 0.45851 | 0.65195 | 0.19535 | 1.0000 |
| Si | Si45 | 1.0 | 0.20178 | 0.28805 | 0.19592 | 1.0000 |
| Si | Si46 | 1.0 | 0.45815 | 0.29076 | 0.19133 | 1.0000 |
| Si | Si47 | 1.0 | 0.20307 | 0.04421 | 0.19334 | 1.0000 |
| Si | Si48 | 1.0 | 0.46133 | 0.04625 | 0.19592 | 1.0000 |
| Si | Si49 | 1.0 | 0.14962 | 0.46829 | 0.12375 | 1.0000 |
| Si | Si50 | 1.0 | 0.16513 | 0.85879 | 0.12154 | 1.0000 |
| Si | Si51 | 1.0 | 0.54148 | 0.47368 | 0.12575 | 1.0000 |
| Si | Si52 | 1.0 | 0.83968 | 0.15917 | 0.62441 | 1.0000 |
| Si | Si53 | 1.0 | 0.46726 | 0.53291 | 0.62601 | 1.0000 |
| Si | Si54 | 1.0 | 0.52759 | 0.53080 | 0.37404 | 1.0000 |
| Si | Si55 | 1.0 | 0.47896 | 0.46897 | 0.87847 | 1.0000 |
| Si | Si56 | 1.0 | 0.79297 | 0.35453 | 0.69932 | 1.0000 |
| Si | Si57 | 1.0 | 0.34940 | 0.79522 | 0.04948 | 1.0000 |
| Si | Si58 | 1.0 | 0.78619 | 0.05065 | 0.80795 | 1.0000 |
| Si | Si59 | 1.0 | 0.19637 | 0.94693 | 0.30032 | 1.0000 |

AlSiAl-T2T7T7T9T9:

data\_image0

\_chemical\_formula\_structural H5O128Al5Si59  
\_chemical\_formula\_sum "H5 O128 Al5 Si59"  
\_cell\_length\_a 12.5145  
\_cell\_length\_b 12.5144  
\_cell\_length\_c 26.4924  
\_cell\_angle\_alpha 90.1927  
\_cell\_angle\_beta 90.0972  
\_cell\_angle\_gamma 90.3932

\_space\_group\_name\_H-M\_alt "P 1"  
\_space\_group\_IT\_number 1

loop\_

\_space\_group\_symop\_operation\_xyz  
'x, y, z'

loop\_

\_atom\_site\_type\_symbol  
\_atom\_site\_label  
\_atom\_site\_symmetry\_multiplicity  
\_atom\_site\_fract\_x  
\_atom\_site\_fract\_y  
\_atom\_site\_fract\_z  
\_atom\_site\_occupancy  
H H1 1.0 0.49251 0.14379 0.52744 1.0000  
H H2 1.0 0.85314 0.51752 0.71675 1.0000  
H H3 1.0 0.56281 0.83771 0.34741 1.0000  
H H4 1.0 0.05959 0.02670 0.14026 1.0000  
H H5 1.0 0.43375 0.17158 0.84869 1.0000  
O O1 1.0 0.29277 0.66689 0.06078 1.0000  
O O2 1.0 0.34844 0.81257 0.99189 1.0000  
O O3 1.0 0.24663 0.87167 0.07558 1.0000

;

|   |     |     |         |         |         |        |
|---|-----|-----|---------|---------|---------|--------|
| O | O4  | 1.0 | 0.44928 | 0.80594 | 0.07880 | 1.0000 |
| O | O5  | 1.0 | 0.34008 | 0.49956 | 0.00142 | 1.0000 |
| O | O6  | 1.0 | 0.22542 | 0.47150 | 0.08327 | 1.0000 |
| O | O7  | 1.0 | 0.43280 | 0.51889 | 0.08936 | 1.0000 |
| O | O8  | 1.0 | 0.69393 | 0.66549 | 0.06540 | 1.0000 |
| O | O9  | 1.0 | 0.83099 | 0.82922 | 0.05864 | 1.0000 |
| O | O10 | 1.0 | 0.64548 | 0.85444 | 0.10361 | 1.0000 |
| O | O11 | 1.0 | 0.82594 | 0.49847 | 0.05988 | 1.0000 |
| O | O12 | 1.0 | 0.63775 | 0.47283 | 0.09765 | 1.0000 |
| O | O13 | 1.0 | 0.96271 | 0.66226 | 0.05664 | 1.0000 |
| O | O14 | 1.0 | 0.02193 | 0.84724 | 0.09732 | 1.0000 |
| O | O15 | 1.0 | 0.01501 | 0.47937 | 0.09978 | 1.0000 |
| O | O16 | 1.0 | 0.64051 | 0.33229 | 0.55090 | 1.0000 |
| O | O17 | 1.0 | 0.69776 | 0.17366 | 0.48944 | 1.0000 |
| O | O18 | 1.0 | 0.74365 | 0.16081 | 0.58833 | 1.0000 |
| O | O19 | 1.0 | 0.54480 | 0.14203 | 0.55549 | 1.0000 |
| O | O20 | 1.0 | 0.68177 | 0.50982 | 0.49986 | 1.0000 |
| O | O21 | 1.0 | 0.77662 | 0.47251 | 0.58933 | 1.0000 |
| O | O22 | 1.0 | 0.56725 | 0.51892 | 0.58164 | 1.0000 |
| O | O23 | 1.0 | 0.28774 | 0.32531 | 0.56963 | 1.0000 |
| O | O24 | 1.0 | 0.15577 | 0.15755 | 0.55683 | 1.0000 |
| O | O25 | 1.0 | 0.34207 | 0.13477 | 0.60390 | 1.0000 |
| O | O26 | 1.0 | 0.17468 | 0.49786 | 0.55135 | 1.0000 |
| O | O27 | 1.0 | 0.35788 | 0.51559 | 0.60085 | 1.0000 |
| O | O28 | 1.0 | 0.03847 | 0.33237 | 0.55640 | 1.0000 |
| O | O29 | 1.0 | 0.95669 | 0.15102 | 0.59253 | 1.0000 |
| O | O30 | 1.0 | 0.00280 | 0.50651 | 0.61071 | 1.0000 |
| O | O31 | 1.0 | 0.34319 | 0.38131 | 0.31224 | 1.0000 |
| O | O32 | 1.0 | 0.17046 | 0.35130 | 0.25511 | 1.0000 |
| O | O33 | 1.0 | 0.20728 | 0.22107 | 0.33142 | 1.0000 |
| O | O34 | 1.0 | 0.14892 | 0.42410 | 0.34759 | 1.0000 |
| O | O35 | 1.0 | 0.49546 | 0.33109 | 0.24490 | 1.0000 |
| O | O36 | 1.0 | 0.48780 | 0.23349 | 0.33293 | 1.0000 |
| O | O37 | 1.0 | 0.54419 | 0.44011 | 0.32689 | 1.0000 |

|   |     |     |         |         |         |        |
|---|-----|-----|---------|---------|---------|--------|
| O | O38 | 1.0 | 0.33046 | 0.72580 | 0.31079 | 1.0000 |
| O | O39 | 1.0 | 0.14757 | 0.83008 | 0.31154 | 1.0000 |
| O | O40 | 1.0 | 0.15859 | 0.63802 | 0.35012 | 1.0000 |
| O | O41 | 1.0 | 0.49582 | 0.63610 | 0.35834 | 1.0000 |
| O | O42 | 1.0 | 0.31641 | 0.96316 | 0.31041 | 1.0000 |
| O | O43 | 1.0 | 0.13090 | 0.02524 | 0.34849 | 1.0000 |
| O | O44 | 1.0 | 0.51795 | 0.03054 | 0.35374 | 1.0000 |
| O | O45 | 1.0 | 0.67031 | 0.63591 | 0.81491 | 1.0000 |
| O | O46 | 1.0 | 0.82329 | 0.65157 | 0.74254 | 1.0000 |
| O | O47 | 1.0 | 0.83615 | 0.76785 | 0.82658 | 1.0000 |
| O | O48 | 1.0 | 0.86237 | 0.55516 | 0.82663 | 1.0000 |
| O | O49 | 1.0 | 0.51515 | 0.65215 | 0.74812 | 1.0000 |
| O | O50 | 1.0 | 0.52118 | 0.78636 | 0.82707 | 1.0000 |
| O | O51 | 1.0 | 0.47051 | 0.58442 | 0.84005 | 1.0000 |
| O | O52 | 1.0 | 0.65593 | 0.29019 | 0.80926 | 1.0000 |
| O | O53 | 1.0 | 0.82364 | 0.16332 | 0.82709 | 1.0000 |
| O | O54 | 1.0 | 0.82302 | 0.36002 | 0.85960 | 1.0000 |
| O | O55 | 1.0 | 0.46833 | 0.37373 | 0.83683 | 1.0000 |
| O | O56 | 1.0 | 0.66049 | 0.02916 | 0.81290 | 1.0000 |
| O | O57 | 1.0 | 0.84453 | 0.96790 | 0.85549 | 1.0000 |
| O | O58 | 1.0 | 0.45138 | 0.97859 | 0.84884 | 1.0000 |
| O | O59 | 1.0 | 0.62301 | 0.66987 | 0.93666 | 1.0000 |
| O | O60 | 1.0 | 0.65499 | 0.82777 | 0.00351 | 1.0000 |
| O | O61 | 1.0 | 0.76861 | 0.81956 | 0.91919 | 1.0000 |
| O | O62 | 1.0 | 0.55881 | 0.86663 | 0.91801 | 1.0000 |
| O | O63 | 1.0 | 0.65641 | 0.50794 | 0.99967 | 1.0000 |
| O | O64 | 1.0 | 0.77691 | 0.52871 | 0.91810 | 1.0000 |
| O | O65 | 1.0 | 0.57172 | 0.47148 | 0.91067 | 1.0000 |
| O | O66 | 1.0 | 0.28310 | 0.64899 | 0.93593 | 1.0000 |
| O | O67 | 1.0 | 0.16819 | 0.82518 | 0.93703 | 1.0000 |
| O | O68 | 1.0 | 0.35764 | 0.81732 | 0.89185 | 1.0000 |
| O | O69 | 1.0 | 0.16468 | 0.47638 | 0.94363 | 1.0000 |
| O | O70 | 1.0 | 0.35741 | 0.46403 | 0.90436 | 1.0000 |
| O | O71 | 1.0 | 0.04254 | 0.65355 | 0.94235 | 1.0000 |

|   |      |     |         |         |         |        |
|---|------|-----|---------|---------|---------|--------|
| O | O72  | 1.0 | 0.97452 | 0.82920 | 0.89746 | 1.0000 |
| O | O73  | 1.0 | 0.97710 | 0.47193 | 0.90076 | 1.0000 |
| O | O74  | 1.0 | 0.31031 | 0.32152 | 0.43587 | 1.0000 |
| O | O75  | 1.0 | 0.34281 | 0.17081 | 0.50671 | 1.0000 |
| O | O76  | 1.0 | 0.25053 | 0.12314 | 0.41808 | 1.0000 |
| O | O77  | 1.0 | 0.45971 | 0.16850 | 0.42725 | 1.0000 |
| O | O78  | 1.0 | 0.35972 | 0.47038 | 0.50422 | 1.0000 |
| O | O79  | 1.0 | 0.26112 | 0.52447 | 0.41876 | 1.0000 |
| O | O80  | 1.0 | 0.46316 | 0.46587 | 0.41856 | 1.0000 |
| O | O81  | 1.0 | 0.71496 | 0.35126 | 0.43545 | 1.0000 |
| O | O82  | 1.0 | 0.85007 | 0.18947 | 0.42062 | 1.0000 |
| O | O83  | 1.0 | 0.65336 | 0.17270 | 0.39033 | 1.0000 |
| O | O84  | 1.0 | 0.84643 | 0.52073 | 0.43593 | 1.0000 |
| O | O85  | 1.0 | 0.65587 | 0.53963 | 0.40036 | 1.0000 |
| O | O86  | 1.0 | 0.97575 | 0.35358 | 0.44502 | 1.0000 |
| O | O87  | 1.0 | 0.05227 | 0.18683 | 0.39803 | 1.0000 |
| O | O88  | 1.0 | 0.04952 | 0.54140 | 0.41724 | 1.0000 |
| O | O89  | 1.0 | 0.67545 | 0.35554 | 0.69609 | 1.0000 |
| O | O90  | 1.0 | 0.83609 | 0.32010 | 0.76009 | 1.0000 |
| O | O91  | 1.0 | 0.85150 | 0.25735 | 0.66278 | 1.0000 |
| O | O92  | 1.0 | 0.49660 | 0.30539 | 0.74267 | 1.0000 |
| O | O93  | 1.0 | 0.53296 | 0.23192 | 0.64999 | 1.0000 |
| O | O94  | 1.0 | 0.49338 | 0.44002 | 0.66825 | 1.0000 |
| O | O95  | 1.0 | 0.66764 | 0.71872 | 0.68477 | 1.0000 |
| O | O96  | 1.0 | 0.84262 | 0.84431 | 0.69634 | 1.0000 |
| O | O97  | 1.0 | 0.85256 | 0.66330 | 0.64441 | 1.0000 |
| O | O98  | 1.0 | 0.49373 | 0.83353 | 0.69815 | 1.0000 |
| O | O99  | 1.0 | 0.48139 | 0.64799 | 0.65002 | 1.0000 |
| O | O100 | 1.0 | 0.66821 | 0.95757 | 0.70098 | 1.0000 |
| O | O101 | 1.0 | 0.84071 | 0.04311 | 0.65795 | 1.0000 |
| O | O102 | 1.0 | 0.51076 | 0.00104 | 0.63871 | 1.0000 |
| O | O103 | 1.0 | 0.34217 | 0.64364 | 0.19034 | 1.0000 |
| O | O104 | 1.0 | 0.17452 | 0.65815 | 0.25161 | 1.0000 |
| O | O105 | 1.0 | 0.18898 | 0.78605 | 0.17192 | 1.0000 |

|    |      |     |         |         |         |        |
|----|------|-----|---------|---------|---------|--------|
| O  | O106 | 1.0 | 0.14947 | 0.57639 | 0.16251 | 1.0000 |
| O  | O107 | 1.0 | 0.49997 | 0.66350 | 0.25797 | 1.0000 |
| O  | O108 | 1.0 | 0.51354 | 0.76922 | 0.17275 | 1.0000 |
| O  | O109 | 1.0 | 0.53213 | 0.55610 | 0.17536 | 1.0000 |
| O  | O110 | 1.0 | 0.32220 | 0.29779 | 0.18982 | 1.0000 |
| O  | O111 | 1.0 | 0.15070 | 0.17548 | 0.19881 | 1.0000 |
| O  | O112 | 1.0 | 0.13275 | 0.36344 | 0.15720 | 1.0000 |
| O  | O113 | 1.0 | 0.48478 | 0.16193 | 0.18282 | 1.0000 |
| O  | O114 | 1.0 | 0.50135 | 0.35474 | 0.14548 | 1.0000 |
| O  | O115 | 1.0 | 0.31541 | 0.03580 | 0.18929 | 1.0000 |
| O  | O116 | 1.0 | 0.48933 | 0.96892 | 0.14314 | 1.0000 |
| O  | O117 | 1.0 | 0.99800 | 0.82702 | 0.99706 | 1.0000 |
| O  | O118 | 1.0 | 0.99338 | 0.48811 | 0.00048 | 1.0000 |
| O  | O119 | 1.0 | 0.99124 | 0.17083 | 0.49471 | 1.0000 |
| O  | O120 | 1.0 | 0.98355 | 0.51239 | 0.51149 | 1.0000 |
| O  | O121 | 1.0 | 0.14812 | 0.99467 | 0.25014 | 1.0000 |
| O  | O122 | 1.0 | 0.49068 | 0.99244 | 0.24366 | 1.0000 |
| O  | O123 | 1.0 | 0.83716 | 0.01384 | 0.75668 | 1.0000 |
| O  | O124 | 1.0 | 0.48777 | 0.02605 | 0.73935 | 1.0000 |
| O  | O125 | 1.0 | 0.85748 | 0.46259 | 0.68939 | 1.0000 |
| O  | O126 | 1.0 | 0.50775 | 0.83055 | 0.32146 | 1.0000 |
| O  | O127 | 1.0 | 0.12820 | 0.99638 | 0.14997 | 1.0000 |
| O  | O128 | 1.0 | 0.48086 | 0.17341 | 0.81943 | 1.0000 |
| Al | Al1  | 1.0 | 0.47530 | 0.12491 | 0.61901 | 1.0000 |
| Al | Al2  | 1.0 | 0.87293 | 0.53313 | 0.62655 | 1.0000 |
| Al | Al3  | 1.0 | 0.45237 | 0.96712 | 0.30475 | 1.0000 |
| Al | Al4  | 1.0 | 0.14906 | 0.86071 | 0.12081 | 1.0000 |
| Al | Al5  | 1.0 | 0.52561 | 0.03625 | 0.80141 | 1.0000 |
| Si | Si1  | 1.0 | 0.33278 | 0.79170 | 0.05220 | 1.0000 |
| Si | Si2  | 1.0 | 0.32310 | 0.54049 | 0.05911 | 1.0000 |
| Si | Si3  | 1.0 | 0.70666 | 0.79408 | 0.05748 | 1.0000 |
| Si | Si4  | 1.0 | 0.70377 | 0.53801 | 0.05523 | 1.0000 |
| Si | Si5  | 1.0 | 0.95467 | 0.79195 | 0.05284 | 1.0000 |
| Si | Si6  | 1.0 | 0.94959 | 0.53392 | 0.05394 | 1.0000 |



|    |      |     |         |         |         |        |
|----|------|-----|---------|---------|---------|--------|
| Si | Si7  | 1.0 | 0.52328 | 0.85014 | 0.12465 | 1.0000 |
| Si | Si8  | 1.0 | 0.66309 | 0.20650 | 0.54622 | 1.0000 |
| Si | Si9  | 1.0 | 0.66961 | 0.46036 | 0.55668 | 1.0000 |
| Si | Si10 | 1.0 | 0.27975 | 0.19678 | 0.56078 | 1.0000 |
| Si | Si11 | 1.0 | 0.29441 | 0.45180 | 0.55694 | 1.0000 |
| Si | Si12 | 1.0 | 0.03560 | 0.20408 | 0.55068 | 1.0000 |
| Si | Si13 | 1.0 | 0.05027 | 0.46224 | 0.55905 | 1.0000 |
| Si | Si14 | 1.0 | 0.21753 | 0.34414 | 0.31224 | 1.0000 |
| Si | Si15 | 1.0 | 0.46770 | 0.34530 | 0.30419 | 1.0000 |
| Si | Si16 | 1.0 | 0.20084 | 0.71326 | 0.30546 | 1.0000 |
| Si | Si17 | 1.0 | 0.18957 | 0.95292 | 0.30556 | 1.0000 |
| Si | Si18 | 1.0 | 0.15510 | 0.53049 | 0.38323 | 1.0000 |
| Si | Si19 | 1.0 | 0.79687 | 0.65507 | 0.80311 | 1.0000 |
| Si | Si20 | 1.0 | 0.54411 | 0.66618 | 0.80738 | 1.0000 |
| Si | Si21 | 1.0 | 0.78544 | 0.28226 | 0.81421 | 1.0000 |
| Si | Si22 | 1.0 | 0.78766 | 0.04089 | 0.81247 | 1.0000 |
| Si | Si23 | 1.0 | 0.85883 | 0.47931 | 0.87655 | 1.0000 |
| Si | Si24 | 1.0 | 0.65189 | 0.79691 | 0.94403 | 1.0000 |
| Si | Si25 | 1.0 | 0.65762 | 0.54530 | 0.94118 | 1.0000 |
| Si | Si26 | 1.0 | 0.28902 | 0.77777 | 0.93964 | 1.0000 |
| Si | Si27 | 1.0 | 0.28576 | 0.52290 | 0.94678 | 1.0000 |
| Si | Si28 | 1.0 | 0.04556 | 0.78359 | 0.94385 | 1.0000 |
| Si | Si29 | 1.0 | 0.04465 | 0.52451 | 0.94701 | 1.0000 |
| Si | Si30 | 1.0 | 0.47154 | 0.86276 | 0.87192 | 1.0000 |
| Si | Si31 | 1.0 | 0.33986 | 0.19642 | 0.44649 | 1.0000 |
| Si | Si32 | 1.0 | 0.34766 | 0.44590 | 0.44462 | 1.0000 |
| Si | Si33 | 1.0 | 0.72858 | 0.22277 | 0.43402 | 1.0000 |
| Si | Si34 | 1.0 | 0.72481 | 0.47966 | 0.44400 | 1.0000 |
| Si | Si35 | 1.0 | 0.96818 | 0.22512 | 0.44014 | 1.0000 |
| Si | Si36 | 1.0 | 0.96415 | 0.48139 | 0.45296 | 1.0000 |
| Si | Si37 | 1.0 | 0.52935 | 0.14945 | 0.37550 | 1.0000 |
| Si | Si38 | 1.0 | 0.54810 | 0.33055 | 0.68715 | 1.0000 |
| Si | Si39 | 1.0 | 0.79673 | 0.72290 | 0.69044 | 1.0000 |
| Si | Si40 | 1.0 | 0.53988 | 0.71413 | 0.69503 | 1.0000 |

|    |      |     |         |         |         |        |
|----|------|-----|---------|---------|---------|--------|
| Si | Si41 | 1.0 | 0.79609 | 0.96518 | 0.70286 | 1.0000 |
| Si | Si42 | 1.0 | 0.53814 | 0.95660 | 0.69382 | 1.0000 |
| Si | Si43 | 1.0 | 0.21373 | 0.66917 | 0.19300 | 1.0000 |
| Si | Si44 | 1.0 | 0.47006 | 0.65924 | 0.19762 | 1.0000 |
| Si | Si45 | 1.0 | 0.19508 | 0.29849 | 0.20029 | 1.0000 |
| Si | Si46 | 1.0 | 0.45127 | 0.28534 | 0.19103 | 1.0000 |
| Si | Si47 | 1.0 | 0.44727 | 0.03817 | 0.19107 | 1.0000 |
| Si | Si48 | 1.0 | 0.13168 | 0.47457 | 0.12570 | 1.0000 |
| Si | Si49 | 1.0 | 0.52485 | 0.47573 | 0.12689 | 1.0000 |
| Si | Si50 | 1.0 | 0.84800 | 0.15200 | 0.62561 | 1.0000 |
| Si | Si51 | 1.0 | 0.47633 | 0.52999 | 0.62501 | 1.0000 |
| Si | Si52 | 1.0 | 0.16015 | 0.13936 | 0.37422 | 1.0000 |
| Si | Si53 | 1.0 | 0.53923 | 0.51881 | 0.37590 | 1.0000 |
| Si | Si54 | 1.0 | 0.85514 | 0.84649 | 0.87516 | 1.0000 |
| Si | Si55 | 1.0 | 0.46803 | 0.47701 | 0.87378 | 1.0000 |
| Si | Si56 | 1.0 | 0.80211 | 0.34196 | 0.70212 | 1.0000 |
| Si | Si57 | 1.0 | 0.45595 | 0.70590 | 0.31121 | 1.0000 |
| Si | Si58 | 1.0 | 0.19126 | 0.05341 | 0.20038 | 1.0000 |
| Si | Si59 | 1.0 | 0.52933 | 0.29267 | 0.80064 | 1.0000 |

AlSiAl-T7T7T7T9:

data\_image0

\_chemical\_formula\_structural H5O128Al5Si59  
\_chemical\_formula\_sum "H5 O128 Al5 Si59"  
\_cell\_length\_a 12.5436  
\_cell\_length\_b 12.5317  
\_cell\_length\_c 26.4309  
\_cell\_angle\_alpha 89.8828  
\_cell\_angle\_beta 89.7104  
\_cell\_angle\_gamma 91.0602

\_space\_group\_name\_H-M\_alt "P 1"  
\_space\_group\_IT\_number 1

loop\_

\_space\_group\_symop\_operation\_xyz  
'x, y, z'

loop\_

\_atom\_site\_type\_symbol  
\_atom\_site\_label  
\_atom\_site\_symmetry\_multiplicity  
\_atom\_site\_fract\_x  
\_atom\_site\_fract\_y  
\_atom\_site\_fract\_z  
\_atom\_site\_occupancy  
H H1 1.0 0.48162 0.13859 0.53278 1.0000  
H H2 1.0 0.85781 0.51880 0.71714 1.0000  
H H3 1.0 0.52636 0.85556 0.03142 1.0000  
H H4 1.0 0.13397 0.48498 0.21809 1.0000  
H H5 1.0 0.08549 0.01064 0.14253 1.0000  
O O1 1.0 0.37151 0.67192 0.04818 1.0000  
O O2 1.0 0.32810 0.83326 0.98639 1.0000  
O O3 1.0 0.26756 0.84449 0.08432 1.0000

;

|   |     |     |         |         |         |        |
|---|-----|-----|---------|---------|---------|--------|
| O | O4  | 1.0 | 0.30784 | 0.48820 | 0.00633 | 1.0000 |
| O | O5  | 1.0 | 0.23853 | 0.54180 | 0.09783 | 1.0000 |
| O | O6  | 1.0 | 0.44139 | 0.48647 | 0.08085 | 1.0000 |
| O | O7  | 1.0 | 0.71624 | 0.66040 | 0.05817 | 1.0000 |
| O | O8  | 1.0 | 0.84341 | 0.83287 | 0.04944 | 1.0000 |
| O | O9  | 1.0 | 0.66491 | 0.83949 | 0.10492 | 1.0000 |
| O | O10 | 1.0 | 0.83270 | 0.48752 | 0.05259 | 1.0000 |
| O | O11 | 1.0 | 0.64804 | 0.47842 | 0.09995 | 1.0000 |
| O | O12 | 1.0 | 0.96221 | 0.66046 | 0.05180 | 1.0000 |
| O | O13 | 1.0 | 0.03643 | 0.84349 | 0.09080 | 1.0000 |
| O | O14 | 1.0 | 0.01434 | 0.48380 | 0.10066 | 1.0000 |
| O | O15 | 1.0 | 0.63155 | 0.33029 | 0.55189 | 1.0000 |
| O | O16 | 1.0 | 0.67790 | 0.16915 | 0.49021 | 1.0000 |
| O | O17 | 1.0 | 0.73763 | 0.16011 | 0.58756 | 1.0000 |
| O | O18 | 1.0 | 0.53447 | 0.13979 | 0.56064 | 1.0000 |
| O | O19 | 1.0 | 0.68571 | 0.51252 | 0.50515 | 1.0000 |
| O | O20 | 1.0 | 0.76458 | 0.46687 | 0.59556 | 1.0000 |
| O | O21 | 1.0 | 0.55812 | 0.51583 | 0.58221 | 1.0000 |
| O | O22 | 1.0 | 0.28066 | 0.33571 | 0.56150 | 1.0000 |
| O | O23 | 1.0 | 0.14996 | 0.16596 | 0.55444 | 1.0000 |
| O | O24 | 1.0 | 0.33181 | 0.15388 | 0.60605 | 1.0000 |
| O | O25 | 1.0 | 0.16870 | 0.50998 | 0.55148 | 1.0000 |
| O | O26 | 1.0 | 0.35031 | 0.51909 | 0.60164 | 1.0000 |
| O | O27 | 1.0 | 0.03451 | 0.34051 | 0.55348 | 1.0000 |
| O | O28 | 1.0 | 0.95080 | 0.16146 | 0.59172 | 1.0000 |
| O | O29 | 1.0 | 0.98981 | 0.51726 | 0.60342 | 1.0000 |
| O | O30 | 1.0 | 0.33501 | 0.38287 | 0.30965 | 1.0000 |
| O | O31 | 1.0 | 0.17090 | 0.35238 | 0.24528 | 1.0000 |
| O | O32 | 1.0 | 0.18438 | 0.23523 | 0.32838 | 1.0000 |
| O | O33 | 1.0 | 0.14030 | 0.44497 | 0.33204 | 1.0000 |
| O | O34 | 1.0 | 0.50129 | 0.34595 | 0.24928 | 1.0000 |
| O | O35 | 1.0 | 0.46766 | 0.22797 | 0.33224 | 1.0000 |
| O | O36 | 1.0 | 0.53377 | 0.42939 | 0.33882 | 1.0000 |
| O | O37 | 1.0 | 0.35140 | 0.71531 | 0.30862 | 1.0000 |

|   |     |     |         |         |         |        |
|---|-----|-----|---------|---------|---------|--------|
| O | O38 | 1.0 | 0.18221 | 0.83433 | 0.32684 | 1.0000 |
| O | O39 | 1.0 | 0.19439 | 0.64049 | 0.36446 | 1.0000 |
| O | O40 | 1.0 | 0.51952 | 0.83986 | 0.31625 | 1.0000 |
| O | O41 | 1.0 | 0.53468 | 0.64161 | 0.34264 | 1.0000 |
| O | O42 | 1.0 | 0.34768 | 0.96942 | 0.31529 | 1.0000 |
| O | O43 | 1.0 | 0.16344 | 0.03366 | 0.35380 | 1.0000 |
| O | O44 | 1.0 | 0.53719 | 0.03361 | 0.34588 | 1.0000 |
| O | O45 | 1.0 | 0.66893 | 0.61935 | 0.81001 | 1.0000 |
| O | O46 | 1.0 | 0.82682 | 0.65562 | 0.74218 | 1.0000 |
| O | O47 | 1.0 | 0.81886 | 0.76815 | 0.82686 | 1.0000 |
| O | O48 | 1.0 | 0.86535 | 0.55876 | 0.82737 | 1.0000 |
| O | O49 | 1.0 | 0.50490 | 0.64838 | 0.74862 | 1.0000 |
| O | O50 | 1.0 | 0.53473 | 0.77601 | 0.82817 | 1.0000 |
| O | O51 | 1.0 | 0.46996 | 0.57507 | 0.84054 | 1.0000 |
| O | O52 | 1.0 | 0.64829 | 0.29298 | 0.80793 | 1.0000 |
| O | O53 | 1.0 | 0.81201 | 0.16510 | 0.82705 | 1.0000 |
| O | O54 | 1.0 | 0.81273 | 0.36269 | 0.85870 | 1.0000 |
| O | O55 | 1.0 | 0.48275 | 0.16274 | 0.81867 | 1.0000 |
| O | O56 | 1.0 | 0.46152 | 0.36276 | 0.84088 | 1.0000 |
| O | O57 | 1.0 | 0.64923 | 0.02911 | 0.81392 | 1.0000 |
| O | O58 | 1.0 | 0.83146 | 0.96764 | 0.85520 | 1.0000 |
| O | O59 | 1.0 | 0.45997 | 0.96764 | 0.84714 | 1.0000 |
| O | O60 | 1.0 | 0.62243 | 0.66496 | 0.93860 | 1.0000 |
| O | O61 | 1.0 | 0.65057 | 0.82476 | 0.00570 | 1.0000 |
| O | O62 | 1.0 | 0.76818 | 0.81875 | 0.92203 | 1.0000 |
| O | O63 | 1.0 | 0.55809 | 0.86026 | 0.91964 | 1.0000 |
| O | O64 | 1.0 | 0.65391 | 0.49964 | 0.00002 | 1.0000 |
| O | O65 | 1.0 | 0.77847 | 0.53175 | 0.91881 | 1.0000 |
| O | O66 | 1.0 | 0.57785 | 0.46594 | 0.90897 | 1.0000 |
| O | O67 | 1.0 | 0.28742 | 0.64866 | 0.94276 | 1.0000 |
| O | O68 | 1.0 | 0.16645 | 0.81538 | 0.92143 | 1.0000 |
| O | O69 | 1.0 | 0.36315 | 0.80478 | 0.88741 | 1.0000 |
| O | O70 | 1.0 | 0.16399 | 0.47922 | 0.93221 | 1.0000 |
| O | O71 | 1.0 | 0.36589 | 0.46450 | 0.91129 | 1.0000 |

|   |      |     |         |         |         |        |
|---|------|-----|---------|---------|---------|--------|
| O | O72  | 1.0 | 0.03362 | 0.64933 | 0.93406 | 1.0000 |
| O | O73  | 1.0 | 0.96854 | 0.83004 | 0.89259 | 1.0000 |
| O | O74  | 1.0 | 0.97157 | 0.46094 | 0.90070 | 1.0000 |
| O | O75  | 1.0 | 0.37617 | 0.32999 | 0.43930 | 1.0000 |
| O | O76  | 1.0 | 0.34302 | 0.17176 | 0.50733 | 1.0000 |
| O | O77  | 1.0 | 0.23184 | 0.17520 | 0.42251 | 1.0000 |
| O | O78  | 1.0 | 0.44163 | 0.13486 | 0.42207 | 1.0000 |
| O | O79  | 1.0 | 0.35277 | 0.49290 | 0.50268 | 1.0000 |
| O | O80  | 1.0 | 0.22351 | 0.46917 | 0.42356 | 1.0000 |
| O | O81  | 1.0 | 0.42564 | 0.52857 | 0.41069 | 1.0000 |
| O | O82  | 1.0 | 0.70672 | 0.35182 | 0.44211 | 1.0000 |
| O | O83  | 1.0 | 0.83493 | 0.18877 | 0.42283 | 1.0000 |
| O | O84  | 1.0 | 0.63772 | 0.18699 | 0.39099 | 1.0000 |
| O | O85  | 1.0 | 0.83664 | 0.51868 | 0.43345 | 1.0000 |
| O | O86  | 1.0 | 0.63815 | 0.53844 | 0.40918 | 1.0000 |
| O | O87  | 1.0 | 0.96997 | 0.35260 | 0.43700 | 1.0000 |
| O | O88  | 1.0 | 0.03210 | 0.17261 | 0.39397 | 1.0000 |
| O | O89  | 1.0 | 0.03134 | 0.54234 | 0.40430 | 1.0000 |
| O | O90  | 1.0 | 0.66846 | 0.36658 | 0.69806 | 1.0000 |
| O | O91  | 1.0 | 0.83021 | 0.32129 | 0.75951 | 1.0000 |
| O | O92  | 1.0 | 0.83914 | 0.26157 | 0.66215 | 1.0000 |
| O | O93  | 1.0 | 0.48719 | 0.31007 | 0.74535 | 1.0000 |
| O | O94  | 1.0 | 0.53025 | 0.23698 | 0.65338 | 1.0000 |
| O | O95  | 1.0 | 0.48288 | 0.44268 | 0.67014 | 1.0000 |
| O | O96  | 1.0 | 0.66230 | 0.71871 | 0.68920 | 1.0000 |
| O | O97  | 1.0 | 0.83271 | 0.84904 | 0.69527 | 1.0000 |
| O | O98  | 1.0 | 0.84279 | 0.66698 | 0.64338 | 1.0000 |
| O | O99  | 1.0 | 0.48901 | 0.83199 | 0.69963 | 1.0000 |
| O | O100 | 1.0 | 0.47878 | 0.64991 | 0.64954 | 1.0000 |
| O | O101 | 1.0 | 0.65902 | 0.96552 | 0.69639 | 1.0000 |
| O | O102 | 1.0 | 0.83776 | 0.04801 | 0.65758 | 1.0000 |
| O | O103 | 1.0 | 0.48144 | 0.01057 | 0.64799 | 1.0000 |
| O | O104 | 1.0 | 0.33053 | 0.62803 | 0.20169 | 1.0000 |
| O | O105 | 1.0 | 0.16941 | 0.66709 | 0.26498 | 1.0000 |

|    |      |     |         |         |         |        |
|----|------|-----|---------|---------|---------|--------|
| O  | O106 | 1.0 | 0.16463 | 0.74761 | 0.17109 | 1.0000 |
| O  | O107 | 1.0 | 0.51245 | 0.68667 | 0.24571 | 1.0000 |
| O  | O108 | 1.0 | 0.46469 | 0.76297 | 0.15453 | 1.0000 |
| O  | O109 | 1.0 | 0.51622 | 0.55813 | 0.16905 | 1.0000 |
| O  | O110 | 1.0 | 0.33671 | 0.28493 | 0.19392 | 1.0000 |
| O  | O111 | 1.0 | 0.16447 | 0.16039 | 0.19969 | 1.0000 |
| O  | O112 | 1.0 | 0.15929 | 0.34013 | 0.14562 | 1.0000 |
| O  | O113 | 1.0 | 0.50695 | 0.16717 | 0.19606 | 1.0000 |
| O  | O114 | 1.0 | 0.51681 | 0.35173 | 0.14890 | 1.0000 |
| O  | O115 | 1.0 | 0.33608 | 0.03464 | 0.19130 | 1.0000 |
| O  | O116 | 1.0 | 0.51746 | 0.98630 | 0.14654 | 1.0000 |
| O  | O117 | 1.0 | 0.01438 | 0.82285 | 0.99130 | 1.0000 |
| O  | O118 | 1.0 | 0.01016 | 0.48831 | 0.99970 | 1.0000 |
| O  | O119 | 1.0 | 0.98436 | 0.17742 | 0.49317 | 1.0000 |
| O  | O120 | 1.0 | 0.98660 | 0.51373 | 0.50267 | 1.0000 |
| O  | O121 | 1.0 | 0.17814 | 0.98357 | 0.25577 | 1.0000 |
| O  | O122 | 1.0 | 0.50332 | 0.98900 | 0.24750 | 1.0000 |
| O  | O123 | 1.0 | 0.82253 | 0.01587 | 0.75627 | 1.0000 |
| O  | O124 | 1.0 | 0.48774 | 0.01414 | 0.74881 | 1.0000 |
| O  | O125 | 1.0 | 0.85772 | 0.46516 | 0.68941 | 1.0000 |
| O  | O126 | 1.0 | 0.46955 | 0.85974 | 0.05811 | 1.0000 |
| O  | O127 | 1.0 | 0.13720 | 0.53875 | 0.19045 | 1.0000 |
| O  | O128 | 1.0 | 0.14679 | 0.97297 | 0.15603 | 1.0000 |
| Al | Al1  | 1.0 | 0.46180 | 0.13471 | 0.62395 | 1.0000 |
| Al | Al2  | 1.0 | 0.86435 | 0.53676 | 0.62623 | 1.0000 |
| Al | Al3  | 1.0 | 0.53439 | 0.86147 | 0.12214 | 1.0000 |
| Al | Al4  | 1.0 | 0.13689 | 0.47047 | 0.12690 | 1.0000 |
| Al | Al5  | 1.0 | 0.15576 | 0.83796 | 0.12228 | 1.0000 |
| Si | Si1  | 1.0 | 0.33756 | 0.54711 | 0.05944 | 1.0000 |
| Si | Si2  | 1.0 | 0.72179 | 0.78959 | 0.05664 | 1.0000 |
| Si | Si3  | 1.0 | 0.71297 | 0.53180 | 0.05301 | 1.0000 |
| Si | Si4  | 1.0 | 0.96544 | 0.78954 | 0.04683 | 1.0000 |
| Si | Si5  | 1.0 | 0.95605 | 0.53055 | 0.05221 | 1.0000 |
| Si | Si6  | 1.0 | 0.65195 | 0.20438 | 0.54793 | 1.0000 |

|    |      |     |         |         |         |        |
|----|------|-----|---------|---------|---------|--------|
| Si | Si7  | 1.0 | 0.66241 | 0.45748 | 0.56001 | 1.0000 |
| Si | Si8  | 1.0 | 0.27379 | 0.20651 | 0.55907 | 1.0000 |
| Si | Si9  | 1.0 | 0.28775 | 0.46418 | 0.55492 | 1.0000 |
| Si | Si10 | 1.0 | 0.03015 | 0.21238 | 0.54859 | 1.0000 |
| Si | Si11 | 1.0 | 0.04439 | 0.47061 | 0.55395 | 1.0000 |
| Si | Si12 | 1.0 | 0.20860 | 0.35274 | 0.30472 | 1.0000 |
| Si | Si13 | 1.0 | 0.45970 | 0.34646 | 0.30739 | 1.0000 |
| Si | Si14 | 1.0 | 0.22423 | 0.71442 | 0.31622 | 1.0000 |
| Si | Si15 | 1.0 | 0.47978 | 0.71977 | 0.30266 | 1.0000 |
| Si | Si16 | 1.0 | 0.21911 | 0.95557 | 0.31313 | 1.0000 |
| Si | Si17 | 1.0 | 0.47573 | 0.95815 | 0.30546 | 1.0000 |
| Si | Si18 | 1.0 | 0.14856 | 0.52427 | 0.38107 | 1.0000 |
| Si | Si19 | 1.0 | 0.79442 | 0.65221 | 0.80235 | 1.0000 |
| Si | Si20 | 1.0 | 0.54416 | 0.65477 | 0.80682 | 1.0000 |
| Si | Si21 | 1.0 | 0.77555 | 0.28494 | 0.81351 | 1.0000 |
| Si | Si22 | 1.0 | 0.51994 | 0.28243 | 0.80293 | 1.0000 |
| Si | Si23 | 1.0 | 0.77811 | 0.04315 | 0.81269 | 1.0000 |
| Si | Si24 | 1.0 | 0.52135 | 0.04312 | 0.80620 | 1.0000 |
| Si | Si25 | 1.0 | 0.85583 | 0.47879 | 0.87639 | 1.0000 |
| Si | Si26 | 1.0 | 0.65149 | 0.79139 | 0.94570 | 1.0000 |
| Si | Si27 | 1.0 | 0.65829 | 0.54019 | 0.94184 | 1.0000 |
| Si | Si28 | 1.0 | 0.28555 | 0.77588 | 0.93456 | 1.0000 |
| Si | Si29 | 1.0 | 0.28190 | 0.52025 | 0.94842 | 1.0000 |
| Si | Si30 | 1.0 | 0.04470 | 0.77867 | 0.93554 | 1.0000 |
| Si | Si31 | 1.0 | 0.04454 | 0.52124 | 0.94269 | 1.0000 |
| Si | Si32 | 1.0 | 0.47898 | 0.85095 | 0.87077 | 1.0000 |
| Si | Si33 | 1.0 | 0.34657 | 0.20388 | 0.44731 | 1.0000 |
| Si | Si34 | 1.0 | 0.34458 | 0.45569 | 0.44428 | 1.0000 |
| Si | Si35 | 1.0 | 0.71479 | 0.22440 | 0.43648 | 1.0000 |
| Si | Si36 | 1.0 | 0.71661 | 0.48029 | 0.44788 | 1.0000 |
| Si | Si37 | 1.0 | 0.95641 | 0.22363 | 0.43735 | 1.0000 |
| Si | Si38 | 1.0 | 0.95636 | 0.48050 | 0.44542 | 1.0000 |
| Si | Si39 | 1.0 | 0.52094 | 0.14727 | 0.37290 | 1.0000 |
| Si | Si40 | 1.0 | 0.54107 | 0.33668 | 0.69061 | 1.0000 |



|    |      |     |         |         |         |        |
|----|------|-----|---------|---------|---------|--------|
| Si | Si41 | 1.0 | 0.79145 | 0.72527 | 0.69086 | 1.0000 |
| Si | Si42 | 1.0 | 0.53395 | 0.71251 | 0.69633 | 1.0000 |
| Si | Si43 | 1.0 | 0.78705 | 0.96931 | 0.70115 | 1.0000 |
| Si | Si44 | 1.0 | 0.52903 | 0.95614 | 0.69719 | 1.0000 |
| Si | Si45 | 1.0 | 0.45615 | 0.66182 | 0.19128 | 1.0000 |
| Si | Si46 | 1.0 | 0.20809 | 0.28464 | 0.19409 | 1.0000 |
| Si | Si47 | 1.0 | 0.46596 | 0.28823 | 0.19649 | 1.0000 |
| Si | Si48 | 1.0 | 0.46767 | 0.04323 | 0.19433 | 1.0000 |
| Si | Si49 | 1.0 | 0.52959 | 0.47051 | 0.12456 | 1.0000 |
| Si | Si50 | 1.0 | 0.84167 | 0.15740 | 0.62484 | 1.0000 |
| Si | Si51 | 1.0 | 0.46852 | 0.53089 | 0.62589 | 1.0000 |
| Si | Si52 | 1.0 | 0.15298 | 0.15449 | 0.37478 | 1.0000 |
| Si | Si53 | 1.0 | 0.53214 | 0.53361 | 0.37540 | 1.0000 |
| Si | Si54 | 1.0 | 0.84704 | 0.84614 | 0.87439 | 1.0000 |
| Si | Si55 | 1.0 | 0.46949 | 0.46799 | 0.87545 | 1.0000 |
| Si | Si56 | 1.0 | 0.79438 | 0.34704 | 0.70207 | 1.0000 |
| Si | Si57 | 1.0 | 0.35080 | 0.79889 | 0.04474 | 1.0000 |
| Si | Si58 | 1.0 | 0.20482 | 0.65359 | 0.20591 | 1.0000 |
| Si | Si59 | 1.0 | 0.21168 | 0.04141 | 0.20329 | 1.0000 |

T1T1T7T7T7T7

data\_image0

\_chemical\_formula\_structural H6O128Al6Si58  
\_chemical\_formula\_sum "H6 O128 Al6 Si58"  
\_cell\_length\_a 12.5338  
\_cell\_length\_b 12.5326  
\_cell\_length\_c 26.4749  
\_cell\_angle\_alpha 89.8857  
\_cell\_angle\_beta 89.8145  
\_cell\_angle\_gamma 91.2239

\_space\_group\_name\_H-M\_alt "P 1"  
\_space\_group\_IT\_number 1

loop\_

\_space\_group\_symop\_operation\_xyz  
'x, y, z'

loop\_

\_atom\_site\_type\_symbol  
\_atom\_site\_label  
\_atom\_site\_symmetry\_multiplicity  
\_atom\_site\_fract\_x  
\_atom\_site\_fract\_y  
\_atom\_site\_fract\_z  
\_atom\_site\_occupancy  
H H1 1.0 0.47862 0.14150 0.53322 1.0000  
H H2 1.0 0.85763 0.52056 0.71665 1.0000  
H H3 1.0 0.52001 0.86104 0.03336 1.0000  
H H4 1.0 0.12925 0.82259 0.36134 1.0000  
H H5 1.0 0.13894 0.48109 0.21718 1.0000  
H H6 1.0 0.17868 0.86993 0.88888 1.0000  
O O1 1.0 0.37320 0.66820 0.05002 1.0000  
O O2 1.0 0.32669 0.82895 0.98891 1.0000

;

|   |     |     |         |         |         |        |
|---|-----|-----|---------|---------|---------|--------|
| O | O3  | 1.0 | 0.25889 | 0.83365 | 0.08509 | 1.0000 |
| O | O4  | 1.0 | 0.31140 | 0.48709 | 0.00588 | 1.0000 |
| O | O5  | 1.0 | 0.23749 | 0.53713 | 0.09709 | 1.0000 |
| O | O6  | 1.0 | 0.44144 | 0.48225 | 0.08187 | 1.0000 |
| O | O7  | 1.0 | 0.71850 | 0.66161 | 0.05920 | 1.0000 |
| O | O8  | 1.0 | 0.85042 | 0.83165 | 0.05615 | 1.0000 |
| O | O9  | 1.0 | 0.66491 | 0.84015 | 0.10561 | 1.0000 |
| O | O10 | 1.0 | 0.83289 | 0.48718 | 0.05199 | 1.0000 |
| O | O11 | 1.0 | 0.64911 | 0.47865 | 0.09977 | 1.0000 |
| O | O12 | 1.0 | 0.96498 | 0.65771 | 0.05230 | 1.0000 |
| O | O13 | 1.0 | 0.04549 | 0.83084 | 0.09680 | 1.0000 |
| O | O14 | 1.0 | 0.01289 | 0.48143 | 0.10172 | 1.0000 |
| O | O15 | 1.0 | 0.62977 | 0.33313 | 0.55211 | 1.0000 |
| O | O16 | 1.0 | 0.67432 | 0.17186 | 0.49044 | 1.0000 |
| O | O17 | 1.0 | 0.73604 | 0.16293 | 0.58747 | 1.0000 |
| O | O18 | 1.0 | 0.53209 | 0.14238 | 0.56100 | 1.0000 |
| O | O19 | 1.0 | 0.68446 | 0.51604 | 0.50490 | 1.0000 |
| O | O20 | 1.0 | 0.76427 | 0.46968 | 0.59505 | 1.0000 |
| O | O21 | 1.0 | 0.55805 | 0.51892 | 0.58210 | 1.0000 |
| O | O22 | 1.0 | 0.28092 | 0.33636 | 0.56070 | 1.0000 |
| O | O23 | 1.0 | 0.14809 | 0.16818 | 0.55358 | 1.0000 |
| O | O24 | 1.0 | 0.32934 | 0.15465 | 0.60586 | 1.0000 |
| O | O25 | 1.0 | 0.16825 | 0.51105 | 0.55168 | 1.0000 |
| O | O26 | 1.0 | 0.35023 | 0.52024 | 0.60073 | 1.0000 |
| O | O27 | 1.0 | 0.03236 | 0.34288 | 0.55322 | 1.0000 |
| O | O28 | 1.0 | 0.94979 | 0.16390 | 0.59212 | 1.0000 |
| O | O29 | 1.0 | 0.98900 | 0.52057 | 0.60275 | 1.0000 |
| O | O30 | 1.0 | 0.33057 | 0.37797 | 0.31055 | 1.0000 |
| O | O31 | 1.0 | 0.17151 | 0.34158 | 0.24378 | 1.0000 |
| O | O32 | 1.0 | 0.18324 | 0.22488 | 0.32775 | 1.0000 |
| O | O33 | 1.0 | 0.13388 | 0.43274 | 0.33082 | 1.0000 |
| O | O34 | 1.0 | 0.49692 | 0.34824 | 0.24968 | 1.0000 |
| O | O35 | 1.0 | 0.46455 | 0.22306 | 0.33077 | 1.0000 |
| O | O36 | 1.0 | 0.52958 | 0.42451 | 0.34020 | 1.0000 |

|   |     |     |         |         |         |        |
|---|-----|-----|---------|---------|---------|--------|
| O | O37 | 1.0 | 0.35346 | 0.72143 | 0.30738 | 1.0000 |
| O | O38 | 1.0 | 0.19834 | 0.62618 | 0.36028 | 1.0000 |
| O | O39 | 1.0 | 0.52926 | 0.83801 | 0.31683 | 1.0000 |
| O | O40 | 1.0 | 0.53194 | 0.63706 | 0.34116 | 1.0000 |
| O | O41 | 1.0 | 0.35741 | 0.96333 | 0.31653 | 1.0000 |
| O | O42 | 1.0 | 0.15827 | 0.02867 | 0.36160 | 1.0000 |
| O | O43 | 1.0 | 0.54601 | 0.03296 | 0.34737 | 1.0000 |
| O | O44 | 1.0 | 0.67112 | 0.61675 | 0.80944 | 1.0000 |
| O | O45 | 1.0 | 0.82882 | 0.65654 | 0.74248 | 1.0000 |
| O | O46 | 1.0 | 0.81585 | 0.77162 | 0.82584 | 1.0000 |
| O | O47 | 1.0 | 0.86907 | 0.56326 | 0.82907 | 1.0000 |
| O | O48 | 1.0 | 0.50472 | 0.65058 | 0.74933 | 1.0000 |
| O | O49 | 1.0 | 0.54194 | 0.77643 | 0.82899 | 1.0000 |
| O | O50 | 1.0 | 0.47116 | 0.57681 | 0.84050 | 1.0000 |
| O | O51 | 1.0 | 0.64635 | 0.28834 | 0.80648 | 1.0000 |
| O | O52 | 1.0 | 0.81357 | 0.16877 | 0.82655 | 1.0000 |
| O | O53 | 1.0 | 0.80620 | 0.36810 | 0.85776 | 1.0000 |
| O | O54 | 1.0 | 0.47602 | 0.16345 | 0.81765 | 1.0000 |
| O | O55 | 1.0 | 0.46399 | 0.36381 | 0.84169 | 1.0000 |
| O | O56 | 1.0 | 0.64691 | 0.03675 | 0.81195 | 1.0000 |
| O | O57 | 1.0 | 0.82464 | 0.97091 | 0.85462 | 1.0000 |
| O | O58 | 1.0 | 0.46203 | 0.96687 | 0.84728 | 1.0000 |
| O | O59 | 1.0 | 0.62513 | 0.66948 | 0.93945 | 1.0000 |
| O | O60 | 1.0 | 0.65999 | 0.82830 | 0.00663 | 1.0000 |
| O | O61 | 1.0 | 0.77614 | 0.81891 | 0.92219 | 1.0000 |
| O | O62 | 1.0 | 0.56774 | 0.86578 | 0.92012 | 1.0000 |
| O | O63 | 1.0 | 0.65352 | 0.50318 | 0.00040 | 1.0000 |
| O | O64 | 1.0 | 0.77959 | 0.53493 | 0.91946 | 1.0000 |
| O | O65 | 1.0 | 0.57837 | 0.47032 | 0.90968 | 1.0000 |
| O | O66 | 1.0 | 0.28047 | 0.64649 | 0.94292 | 1.0000 |
| O | O67 | 1.0 | 0.37457 | 0.80221 | 0.89013 | 1.0000 |
| O | O68 | 1.0 | 0.16382 | 0.47081 | 0.93315 | 1.0000 |
| O | O69 | 1.0 | 0.36599 | 0.46728 | 0.91044 | 1.0000 |
| O | O70 | 1.0 | 0.03857 | 0.64265 | 0.93407 | 1.0000 |

|   |      |     |         |         |         |        |
|---|------|-----|---------|---------|---------|--------|
| O | O71  | 1.0 | 0.97255 | 0.84034 | 0.88809 | 1.0000 |
| O | O72  | 1.0 | 0.96953 | 0.45452 | 0.90207 | 1.0000 |
| O | O73  | 1.0 | 0.38255 | 0.32909 | 0.44053 | 1.0000 |
| O | O74  | 1.0 | 0.34304 | 0.17103 | 0.50734 | 1.0000 |
| O | O75  | 1.0 | 0.22771 | 0.18440 | 0.42422 | 1.0000 |
| O | O76  | 1.0 | 0.43632 | 0.13154 | 0.42061 | 1.0000 |
| O | O77  | 1.0 | 0.34964 | 0.49408 | 0.50158 | 1.0000 |
| O | O78  | 1.0 | 0.22359 | 0.45959 | 0.42178 | 1.0000 |
| O | O79  | 1.0 | 0.42369 | 0.52932 | 0.41058 | 1.0000 |
| O | O80  | 1.0 | 0.71253 | 0.35494 | 0.44393 | 1.0000 |
| O | O81  | 1.0 | 0.83093 | 0.18760 | 0.42307 | 1.0000 |
| O | O82  | 1.0 | 0.63126 | 0.19636 | 0.39226 | 1.0000 |
| O | O83  | 1.0 | 0.83658 | 0.52627 | 0.43360 | 1.0000 |
| O | O84  | 1.0 | 0.63688 | 0.53697 | 0.40847 | 1.0000 |
| O | O85  | 1.0 | 0.96222 | 0.35473 | 0.43822 | 1.0000 |
| O | O86  | 1.0 | 0.02893 | 0.17850 | 0.39451 | 1.0000 |
| O | O87  | 1.0 | 0.03325 | 0.53971 | 0.40344 | 1.0000 |
| O | O88  | 1.0 | 0.66682 | 0.36785 | 0.69786 | 1.0000 |
| O | O89  | 1.0 | 0.82892 | 0.32529 | 0.75937 | 1.0000 |
| O | O90  | 1.0 | 0.83764 | 0.26285 | 0.66245 | 1.0000 |
| O | O91  | 1.0 | 0.48463 | 0.31333 | 0.74551 | 1.0000 |
| O | O92  | 1.0 | 0.52820 | 0.23609 | 0.65446 | 1.0000 |
| O | O93  | 1.0 | 0.48136 | 0.44227 | 0.66921 | 1.0000 |
| O | O94  | 1.0 | 0.66239 | 0.71853 | 0.69008 | 1.0000 |
| O | O95  | 1.0 | 0.83098 | 0.85116 | 0.69596 | 1.0000 |
| O | O96  | 1.0 | 0.84293 | 0.66941 | 0.64383 | 1.0000 |
| O | O97  | 1.0 | 0.48845 | 0.83204 | 0.69913 | 1.0000 |
| O | O98  | 1.0 | 0.47803 | 0.64969 | 0.65023 | 1.0000 |
| O | O99  | 1.0 | 0.65686 | 0.96768 | 0.69673 | 1.0000 |
| O | O100 | 1.0 | 0.83550 | 0.04920 | 0.65703 | 1.0000 |
| O | O101 | 1.0 | 0.47858 | 0.01091 | 0.64793 | 1.0000 |
| O | O102 | 1.0 | 0.33254 | 0.62729 | 0.20062 | 1.0000 |
| O | O103 | 1.0 | 0.17132 | 0.67411 | 0.26155 | 1.0000 |
| O | O104 | 1.0 | 0.16767 | 0.74217 | 0.16549 | 1.0000 |

|    |      |     |         |         |         |        |
|----|------|-----|---------|---------|---------|--------|
| O  | O105 | 1.0 | 0.51356 | 0.68766 | 0.24511 | 1.0000 |
| O  | O106 | 1.0 | 0.46370 | 0.76388 | 0.15416 | 1.0000 |
| O  | O107 | 1.0 | 0.51879 | 0.55965 | 0.16831 | 1.0000 |
| O  | O108 | 1.0 | 0.33824 | 0.28273 | 0.19117 | 1.0000 |
| O  | O109 | 1.0 | 0.16838 | 0.15041 | 0.19465 | 1.0000 |
| O  | O110 | 1.0 | 0.15944 | 0.33555 | 0.14489 | 1.0000 |
| O  | O111 | 1.0 | 0.51245 | 0.16822 | 0.19832 | 1.0000 |
| O  | O112 | 1.0 | 0.52126 | 0.35175 | 0.15038 | 1.0000 |
| O  | O113 | 1.0 | 0.34224 | 0.03572 | 0.19695 | 1.0000 |
| O  | O114 | 1.0 | 0.16812 | 0.95551 | 0.15333 | 1.0000 |
| O  | O115 | 1.0 | 0.51960 | 0.98842 | 0.14820 | 1.0000 |
| O  | O116 | 1.0 | 0.02362 | 0.82786 | 0.99740 | 1.0000 |
| O  | O117 | 1.0 | 0.01199 | 0.48315 | 0.00085 | 1.0000 |
| O  | O118 | 1.0 | 0.98025 | 0.17922 | 0.49355 | 1.0000 |
| O  | O119 | 1.0 | 0.98789 | 0.51740 | 0.50201 | 1.0000 |
| O  | O120 | 1.0 | 0.17306 | 0.97626 | 0.25265 | 1.0000 |
| O  | O121 | 1.0 | 0.51599 | 0.98872 | 0.24897 | 1.0000 |
| O  | O122 | 1.0 | 0.82152 | 0.01986 | 0.75571 | 1.0000 |
| O  | O123 | 1.0 | 0.48326 | 0.01273 | 0.74870 | 1.0000 |
| O  | O124 | 1.0 | 0.85664 | 0.46714 | 0.68884 | 1.0000 |
| O  | O125 | 1.0 | 0.46503 | 0.86056 | 0.06054 | 1.0000 |
| O  | O126 | 1.0 | 0.17850 | 0.82366 | 0.33274 | 1.0000 |
| O  | O127 | 1.0 | 0.13966 | 0.53595 | 0.18996 | 1.0000 |
| O  | O128 | 1.0 | 0.17731 | 0.82151 | 0.91777 | 1.0000 |
| Al | Al1  | 1.0 | 0.45931 | 0.13525 | 0.62393 | 1.0000 |
| Al | Al2  | 1.0 | 0.86390 | 0.53948 | 0.62599 | 1.0000 |
| Al | Al3  | 1.0 | 0.53634 | 0.86423 | 0.12427 | 1.0000 |
| Al | Al4  | 1.0 | 0.22154 | 0.96390 | 0.31284 | 1.0000 |
| Al | Al5  | 1.0 | 0.13634 | 0.46433 | 0.12627 | 1.0000 |
| Al | Al6  | 1.0 | 0.03690 | 0.77856 | 0.93735 | 1.0000 |
| Si | Si1  | 1.0 | 0.33828 | 0.54222 | 0.06008 | 1.0000 |
| Si | Si2  | 1.0 | 0.72667 | 0.79092 | 0.05871 | 1.0000 |
| Si | Si3  | 1.0 | 0.71414 | 0.53311 | 0.05331 | 1.0000 |
| Si | Si4  | 1.0 | 0.97175 | 0.78697 | 0.04986 | 1.0000 |

|    |      |     |         |         |         |        |
|----|------|-----|---------|---------|---------|--------|
| Si | Si5  | 1.0 | 0.95722 | 0.52790 | 0.05248 | 1.0000 |
| Si | Si6  | 1.0 | 0.64965 | 0.20709 | 0.54806 | 1.0000 |
| Si | Si7  | 1.0 | 0.66176 | 0.46033 | 0.55962 | 1.0000 |
| Si | Si8  | 1.0 | 0.27266 | 0.20706 | 0.55839 | 1.0000 |
| Si | Si9  | 1.0 | 0.28710 | 0.46487 | 0.55424 | 1.0000 |
| Si | Si10 | 1.0 | 0.02807 | 0.21455 | 0.54841 | 1.0000 |
| Si | Si11 | 1.0 | 0.04349 | 0.47295 | 0.55359 | 1.0000 |
| Si | Si12 | 1.0 | 0.20548 | 0.34165 | 0.30346 | 1.0000 |
| Si | Si13 | 1.0 | 0.45577 | 0.34276 | 0.30756 | 1.0000 |
| Si | Si14 | 1.0 | 0.48375 | 0.72124 | 0.30220 | 1.0000 |
| Si | Si15 | 1.0 | 0.48326 | 0.95721 | 0.30654 | 1.0000 |
| Si | Si16 | 1.0 | 0.14765 | 0.51201 | 0.37923 | 1.0000 |
| Si | Si17 | 1.0 | 0.79643 | 0.65374 | 0.80271 | 1.0000 |
| Si | Si18 | 1.0 | 0.54738 | 0.65496 | 0.80690 | 1.0000 |
| Si | Si19 | 1.0 | 0.77394 | 0.28753 | 0.81298 | 1.0000 |
| Si | Si20 | 1.0 | 0.51770 | 0.28280 | 0.80262 | 1.0000 |
| Si | Si21 | 1.0 | 0.77627 | 0.04766 | 0.81181 | 1.0000 |
| Si | Si22 | 1.0 | 0.51861 | 0.04502 | 0.80539 | 1.0000 |
| Si | Si23 | 1.0 | 0.85612 | 0.48071 | 0.87714 | 1.0000 |
| Si | Si24 | 1.0 | 0.66001 | 0.79488 | 0.94687 | 1.0000 |
| Si | Si25 | 1.0 | 0.65978 | 0.54414 | 0.94252 | 1.0000 |
| Si | Si26 | 1.0 | 0.28020 | 0.51625 | 0.94846 | 1.0000 |
| Si | Si27 | 1.0 | 0.04445 | 0.51662 | 0.94345 | 1.0000 |
| Si | Si28 | 1.0 | 0.48918 | 0.85243 | 0.87150 | 1.0000 |
| Si | Si29 | 1.0 | 0.34570 | 0.20376 | 0.44719 | 1.0000 |
| Si | Si30 | 1.0 | 0.34499 | 0.45292 | 0.44376 | 1.0000 |
| Si | Si31 | 1.0 | 0.71233 | 0.22742 | 0.43699 | 1.0000 |
| Si | Si32 | 1.0 | 0.71714 | 0.48361 | 0.44792 | 1.0000 |
| Si | Si33 | 1.0 | 0.95198 | 0.22537 | 0.43772 | 1.0000 |
| Si | Si34 | 1.0 | 0.95495 | 0.48301 | 0.44528 | 1.0000 |
| Si | Si35 | 1.0 | 0.51907 | 0.14594 | 0.37267 | 1.0000 |
| Si | Si36 | 1.0 | 0.53928 | 0.33728 | 0.69067 | 1.0000 |
| Si | Si37 | 1.0 | 0.79174 | 0.72655 | 0.69154 | 1.0000 |
| Si | Si38 | 1.0 | 0.53389 | 0.71286 | 0.69660 | 1.0000 |

|    |      |     |         |         |         |        |
|----|------|-----|---------|---------|---------|--------|
| Si | Si39 | 1.0 | 0.78525 | 0.97151 | 0.70108 | 1.0000 |
| Si | Si40 | 1.0 | 0.52680 | 0.95674 | 0.69697 | 1.0000 |
| Si | Si41 | 1.0 | 0.45860 | 0.66231 | 0.19068 | 1.0000 |
| Si | Si42 | 1.0 | 0.20894 | 0.27422 | 0.19180 | 1.0000 |
| Si | Si43 | 1.0 | 0.46678 | 0.28707 | 0.19692 | 1.0000 |
| Si | Si44 | 1.0 | 0.21304 | 0.02887 | 0.20022 | 1.0000 |
| Si | Si45 | 1.0 | 0.47205 | 0.04381 | 0.19735 | 1.0000 |
| Si | Si46 | 1.0 | 0.15880 | 0.84171 | 0.12519 | 1.0000 |
| Si | Si47 | 1.0 | 0.53169 | 0.46910 | 0.12511 | 1.0000 |
| Si | Si48 | 1.0 | 0.84011 | 0.15931 | 0.62475 | 1.0000 |
| Si | Si49 | 1.0 | 0.46800 | 0.53160 | 0.62553 | 1.0000 |
| Si | Si50 | 1.0 | 0.14955 | 0.15157 | 0.37699 | 1.0000 |
| Si | Si51 | 1.0 | 0.53003 | 0.53080 | 0.37508 | 1.0000 |
| Si | Si52 | 1.0 | 0.84982 | 0.85034 | 0.87271 | 1.0000 |
| Si | Si53 | 1.0 | 0.47100 | 0.46998 | 0.87560 | 1.0000 |
| Si | Si54 | 1.0 | 0.79299 | 0.34912 | 0.70183 | 1.0000 |
| Si | Si55 | 1.0 | 0.34947 | 0.79347 | 0.04737 | 1.0000 |
| Si | Si56 | 1.0 | 0.22850 | 0.70494 | 0.31451 | 1.0000 |
| Si | Si57 | 1.0 | 0.20729 | 0.65129 | 0.20312 | 1.0000 |
| Si | Si58 | 1.0 | 0.29606 | 0.77157 | 0.93594 | 1.0000 |



T1T7T7T7T7T9

data\_image0

\_chemical\_formula\_structural H6O128Al6Si58  
\_chemical\_formula\_sum "H6 O128 Al6 Si58"  
\_cell\_length\_a 12.5652  
\_cell\_length\_b 12.5234  
\_cell\_length\_c 26.4877  
\_cell\_angle\_alpha 90.2881  
\_cell\_angle\_beta 89.9101  
\_cell\_angle\_gamma 91.0571

\_space\_group\_name\_H-M\_alt "P 1"  
\_space\_group\_IT\_number 1

loop\_

\_space\_group\_symop\_operation\_xyz  
'x, y, z'

loop\_

\_atom\_site\_type\_symbol  
\_atom\_site\_label  
\_atom\_site\_symmetry\_multiplicity  
\_atom\_site\_fract\_x  
\_atom\_site\_fract\_y  
\_atom\_site\_fract\_z  
\_atom\_site\_occupancy  
H H1 1.0 0.48127 0.13542 0.53288 1.0000  
H H2 1.0 0.85447 0.52683 0.71359 1.0000  
H H3 1.0 0.52551 0.85428 0.03613 1.0000  
H H4 1.0 0.13955 0.47819 0.21646 1.0000  
H H5 1.0 0.90245 0.02556 0.87069 1.0000  
H H6 1.0 0.82335 0.12930 0.38858 1.0000  
O O1 1.0 0.37082 0.66731 0.05297 1.0000  
O O2 1.0 0.33427 0.83004 0.99079 1.0000

;

|   |     |     |         |         |         |        |
|---|-----|-----|---------|---------|---------|--------|
| O | O3  | 1.0 | 0.26277 | 0.83787 | 0.08634 | 1.0000 |
| O | O4  | 1.0 | 0.31056 | 0.48746 | 0.00487 | 1.0000 |
| O | O5  | 1.0 | 0.24345 | 0.52704 | 0.09790 | 1.0000 |
| O | O6  | 1.0 | 0.44721 | 0.48034 | 0.07804 | 1.0000 |
| O | O7  | 1.0 | 0.72070 | 0.65595 | 0.05925 | 1.0000 |
| O | O8  | 1.0 | 0.84970 | 0.82763 | 0.05751 | 1.0000 |
| O | O9  | 1.0 | 0.66818 | 0.83106 | 0.11001 | 1.0000 |
| O | O10 | 1.0 | 0.83714 | 0.48382 | 0.05232 | 1.0000 |
| O | O11 | 1.0 | 0.65247 | 0.47176 | 0.09895 | 1.0000 |
| O | O12 | 1.0 | 0.96874 | 0.65590 | 0.05347 | 1.0000 |
| O | O13 | 1.0 | 0.04929 | 0.83314 | 0.09458 | 1.0000 |
| O | O14 | 1.0 | 0.01875 | 0.47622 | 0.09912 | 1.0000 |
| O | O15 | 1.0 | 0.62649 | 0.32895 | 0.55010 | 1.0000 |
| O | O16 | 1.0 | 0.67508 | 0.16827 | 0.48914 | 1.0000 |
| O | O17 | 1.0 | 0.74003 | 0.16200 | 0.58553 | 1.0000 |
| O | O18 | 1.0 | 0.53494 | 0.13664 | 0.56040 | 1.0000 |
| O | O19 | 1.0 | 0.67686 | 0.51162 | 0.50475 | 1.0000 |
| O | O20 | 1.0 | 0.76780 | 0.46022 | 0.59198 | 1.0000 |
| O | O21 | 1.0 | 0.56195 | 0.51408 | 0.58647 | 1.0000 |
| O | O22 | 1.0 | 0.28248 | 0.33803 | 0.55955 | 1.0000 |
| O | O23 | 1.0 | 0.14868 | 0.16976 | 0.55577 | 1.0000 |
| O | O24 | 1.0 | 0.33321 | 0.15836 | 0.60491 | 1.0000 |
| O | O25 | 1.0 | 0.16919 | 0.51292 | 0.55341 | 1.0000 |
| O | O26 | 1.0 | 0.35284 | 0.52020 | 0.60029 | 1.0000 |
| O | O27 | 1.0 | 0.03402 | 0.34426 | 0.55451 | 1.0000 |
| O | O28 | 1.0 | 0.95389 | 0.16843 | 0.59683 | 1.0000 |
| O | O29 | 1.0 | 0.98810 | 0.52567 | 0.60127 | 1.0000 |
| O | O30 | 1.0 | 0.32868 | 0.38024 | 0.30962 | 1.0000 |
| O | O31 | 1.0 | 0.17031 | 0.34226 | 0.24306 | 1.0000 |
| O | O32 | 1.0 | 0.18374 | 0.22657 | 0.32596 | 1.0000 |
| O | O33 | 1.0 | 0.13182 | 0.43511 | 0.33028 | 1.0000 |
| O | O34 | 1.0 | 0.49479 | 0.34915 | 0.24875 | 1.0000 |
| O | O35 | 1.0 | 0.46090 | 0.22262 | 0.32871 | 1.0000 |
| O | O36 | 1.0 | 0.52773 | 0.42332 | 0.33955 | 1.0000 |

|   |     |     |         |         |         |        |
|---|-----|-----|---------|---------|---------|--------|
| O | O37 | 1.0 | 0.35458 | 0.71008 | 0.30651 | 1.0000 |
| O | O38 | 1.0 | 0.18767 | 0.83006 | 0.32646 | 1.0000 |
| O | O39 | 1.0 | 0.19379 | 0.63130 | 0.35758 | 1.0000 |
| O | O40 | 1.0 | 0.52521 | 0.83488 | 0.31498 | 1.0000 |
| O | O41 | 1.0 | 0.53631 | 0.63716 | 0.34279 | 1.0000 |
| O | O42 | 1.0 | 0.35449 | 0.96159 | 0.31264 | 1.0000 |
| O | O43 | 1.0 | 0.17645 | 0.02750 | 0.35510 | 1.0000 |
| O | O44 | 1.0 | 0.53877 | 0.03087 | 0.34769 | 1.0000 |
| O | O45 | 1.0 | 0.66675 | 0.61999 | 0.80643 | 1.0000 |
| O | O46 | 1.0 | 0.82553 | 0.65247 | 0.73875 | 1.0000 |
| O | O47 | 1.0 | 0.81401 | 0.77471 | 0.82070 | 1.0000 |
| O | O48 | 1.0 | 0.86286 | 0.56515 | 0.82614 | 1.0000 |
| O | O49 | 1.0 | 0.49663 | 0.65972 | 0.75099 | 1.0000 |
| O | O50 | 1.0 | 0.53837 | 0.77719 | 0.83383 | 1.0000 |
| O | O51 | 1.0 | 0.47050 | 0.57700 | 0.84086 | 1.0000 |
| O | O52 | 1.0 | 0.65135 | 0.29527 | 0.80730 | 1.0000 |
| O | O53 | 1.0 | 0.81867 | 0.17322 | 0.82318 | 1.0000 |
| O | O54 | 1.0 | 0.81522 | 0.36885 | 0.85871 | 1.0000 |
| O | O55 | 1.0 | 0.48990 | 0.16373 | 0.82068 | 1.0000 |
| O | O56 | 1.0 | 0.46474 | 0.36532 | 0.83944 | 1.0000 |
| O | O57 | 1.0 | 0.65631 | 0.03015 | 0.81621 | 1.0000 |
| O | O58 | 1.0 | 0.46999 | 0.97069 | 0.85225 | 1.0000 |
| O | O59 | 1.0 | 0.61981 | 0.66579 | 0.94380 | 1.0000 |
| O | O60 | 1.0 | 0.65459 | 0.82485 | 0.01129 | 1.0000 |
| O | O61 | 1.0 | 0.76280 | 0.82257 | 0.92487 | 1.0000 |
| O | O62 | 1.0 | 0.55387 | 0.86015 | 0.92726 | 1.0000 |
| O | O63 | 1.0 | 0.65962 | 0.49521 | 0.99957 | 1.0000 |
| O | O64 | 1.0 | 0.77788 | 0.53918 | 0.91783 | 1.0000 |
| O | O65 | 1.0 | 0.57864 | 0.46850 | 0.90914 | 1.0000 |
| O | O66 | 1.0 | 0.29443 | 0.64960 | 0.94282 | 1.0000 |
| O | O67 | 1.0 | 0.17179 | 0.81995 | 0.92828 | 1.0000 |
| O | O68 | 1.0 | 0.36326 | 0.81198 | 0.89026 | 1.0000 |
| O | O69 | 1.0 | 0.16561 | 0.48324 | 0.93109 | 1.0000 |
| O | O70 | 1.0 | 0.36633 | 0.46353 | 0.90988 | 1.0000 |

|   |      |     |         |         |         |        |
|---|------|-----|---------|---------|---------|--------|
| O | O71  | 1.0 | 0.03879 | 0.65445 | 0.93802 | 1.0000 |
| O | O72  | 1.0 | 0.97819 | 0.83797 | 0.89658 | 1.0000 |
| O | O73  | 1.0 | 0.97255 | 0.47164 | 0.89904 | 1.0000 |
| O | O74  | 1.0 | 0.37412 | 0.33035 | 0.43941 | 1.0000 |
| O | O75  | 1.0 | 0.33936 | 0.17122 | 0.50623 | 1.0000 |
| O | O76  | 1.0 | 0.22424 | 0.18081 | 0.42209 | 1.0000 |
| O | O77  | 1.0 | 0.43253 | 0.13405 | 0.41980 | 1.0000 |
| O | O78  | 1.0 | 0.34773 | 0.49654 | 0.50095 | 1.0000 |
| O | O79  | 1.0 | 0.22167 | 0.46785 | 0.42024 | 1.0000 |
| O | O80  | 1.0 | 0.42482 | 0.52866 | 0.41075 | 1.0000 |
| O | O81  | 1.0 | 0.72086 | 0.35156 | 0.44377 | 1.0000 |
| O | O82  | 1.0 | 0.62597 | 0.19626 | 0.39070 | 1.0000 |
| O | O83  | 1.0 | 0.83600 | 0.52913 | 0.43675 | 1.0000 |
| O | O84  | 1.0 | 0.63795 | 0.52944 | 0.40799 | 1.0000 |
| O | O85  | 1.0 | 0.96143 | 0.35767 | 0.43404 | 1.0000 |
| O | O86  | 1.0 | 0.02835 | 0.15817 | 0.38886 | 1.0000 |
| O | O87  | 1.0 | 0.03002 | 0.54551 | 0.40224 | 1.0000 |
| O | O88  | 1.0 | 0.66606 | 0.37624 | 0.69886 | 1.0000 |
| O | O89  | 1.0 | 0.83083 | 0.33311 | 0.75882 | 1.0000 |
| O | O90  | 1.0 | 0.83016 | 0.26140 | 0.66394 | 1.0000 |
| O | O91  | 1.0 | 0.48958 | 0.30344 | 0.74464 | 1.0000 |
| O | O92  | 1.0 | 0.53438 | 0.24337 | 0.65088 | 1.0000 |
| O | O93  | 1.0 | 0.47630 | 0.44394 | 0.67265 | 1.0000 |
| O | O94  | 1.0 | 0.65722 | 0.72230 | 0.69224 | 1.0000 |
| O | O95  | 1.0 | 0.83009 | 0.84821 | 0.69294 | 1.0000 |
| O | O96  | 1.0 | 0.82877 | 0.66648 | 0.63976 | 1.0000 |
| O | O97  | 1.0 | 0.48430 | 0.83630 | 0.69733 | 1.0000 |
| O | O98  | 1.0 | 0.47642 | 0.65007 | 0.65127 | 1.0000 |
| O | O99  | 1.0 | 0.65730 | 0.96673 | 0.69681 | 1.0000 |
| O | O100 | 1.0 | 0.83394 | 0.04827 | 0.65617 | 1.0000 |
| O | O101 | 1.0 | 0.47838 | 0.02006 | 0.65196 | 1.0000 |
| O | O102 | 1.0 | 0.33411 | 0.62305 | 0.19857 | 1.0000 |
| O | O103 | 1.0 | 0.17285 | 0.67307 | 0.25918 | 1.0000 |
| O | O104 | 1.0 | 0.16799 | 0.73498 | 0.16231 | 1.0000 |

|    |      |     |         |         |         |        |
|----|------|-----|---------|---------|---------|--------|
| O  | O105 | 1.0 | 0.51578 | 0.67712 | 0.24577 | 1.0000 |
| O  | O106 | 1.0 | 0.46401 | 0.76705 | 0.15848 | 1.0000 |
| O  | O107 | 1.0 | 0.52159 | 0.56133 | 0.16465 | 1.0000 |
| O  | O108 | 1.0 | 0.33680 | 0.28031 | 0.19085 | 1.0000 |
| O  | O109 | 1.0 | 0.16971 | 0.14702 | 0.19664 | 1.0000 |
| O  | O110 | 1.0 | 0.15712 | 0.32784 | 0.14437 | 1.0000 |
| O  | O111 | 1.0 | 0.51186 | 0.16874 | 0.19768 | 1.0000 |
| O  | O112 | 1.0 | 0.51800 | 0.35161 | 0.14933 | 1.0000 |
| O  | O113 | 1.0 | 0.34475 | 0.03158 | 0.19618 | 1.0000 |
| O  | O114 | 1.0 | 0.16579 | 0.94884 | 0.15777 | 1.0000 |
| O  | O115 | 1.0 | 0.52531 | 0.98806 | 0.14844 | 1.0000 |
| O  | O116 | 1.0 | 0.01695 | 0.82504 | 0.99629 | 1.0000 |
| O  | O117 | 1.0 | 0.01196 | 0.48612 | 0.99830 | 1.0000 |
| O  | O118 | 1.0 | 0.97552 | 0.17504 | 0.49793 | 1.0000 |
| O  | O119 | 1.0 | 0.99322 | 0.51729 | 0.50078 | 1.0000 |
| O  | O120 | 1.0 | 0.18153 | 0.97916 | 0.25607 | 1.0000 |
| O  | O121 | 1.0 | 0.51732 | 0.99087 | 0.24904 | 1.0000 |
| O  | O122 | 1.0 | 0.82430 | 0.01585 | 0.75427 | 1.0000 |
| O  | O123 | 1.0 | 0.49143 | 0.01036 | 0.75288 | 1.0000 |
| O  | O124 | 1.0 | 0.85679 | 0.46951 | 0.68681 | 1.0000 |
| O  | O125 | 1.0 | 0.46975 | 0.85612 | 0.06325 | 1.0000 |
| O  | O126 | 1.0 | 0.14162 | 0.53129 | 0.18863 | 1.0000 |
| O  | O127 | 1.0 | 0.84629 | 0.98325 | 0.85418 | 1.0000 |
| O  | O128 | 1.0 | 0.82375 | 0.17720 | 0.41773 | 1.0000 |
| Al | Al1  | 1.0 | 0.46203 | 0.13999 | 0.62374 | 1.0000 |
| Al | Al2  | 1.0 | 0.86173 | 0.53788 | 0.62327 | 1.0000 |
| Al | Al3  | 1.0 | 0.53936 | 0.86097 | 0.12632 | 1.0000 |
| Al | Al4  | 1.0 | 0.13979 | 0.45781 | 0.12570 | 1.0000 |
| Al | Al5  | 1.0 | 0.84958 | 0.83969 | 0.87565 | 1.0000 |
| Al | Al6  | 1.0 | 0.96307 | 0.22172 | 0.43745 | 1.0000 |
| Si | Si1  | 1.0 | 0.34062 | 0.53970 | 0.05946 | 1.0000 |
| Si | Si2  | 1.0 | 0.72619 | 0.78540 | 0.06108 | 1.0000 |
| Si | Si3  | 1.0 | 0.71742 | 0.52727 | 0.05294 | 1.0000 |
| Si | Si4  | 1.0 | 0.97076 | 0.78463 | 0.05050 | 1.0000 |

|    |      |     |         |         |         |        |
|----|------|-----|---------|---------|---------|--------|
| Si | Si5  | 1.0 | 0.96033 | 0.52572 | 0.05175 | 1.0000 |
| Si | Si6  | 1.0 | 0.65072 | 0.20373 | 0.54750 | 1.0000 |
| Si | Si7  | 1.0 | 0.66073 | 0.45535 | 0.55963 | 1.0000 |
| Si | Si8  | 1.0 | 0.27249 | 0.20885 | 0.55820 | 1.0000 |
| Si | Si9  | 1.0 | 0.28752 | 0.46655 | 0.55390 | 1.0000 |
| Si | Si10 | 1.0 | 0.02764 | 0.21500 | 0.55026 | 1.0000 |
| Si | Si11 | 1.0 | 0.04473 | 0.47430 | 0.55318 | 1.0000 |
| Si | Si12 | 1.0 | 0.20347 | 0.34456 | 0.30304 | 1.0000 |
| Si | Si13 | 1.0 | 0.45268 | 0.34382 | 0.30641 | 1.0000 |
| Si | Si14 | 1.0 | 0.22713 | 0.71109 | 0.31270 | 1.0000 |
| Si | Si15 | 1.0 | 0.48294 | 0.71459 | 0.30213 | 1.0000 |
| Si | Si16 | 1.0 | 0.22551 | 0.95101 | 0.31206 | 1.0000 |
| Si | Si17 | 1.0 | 0.48239 | 0.95423 | 0.30506 | 1.0000 |
| Si | Si18 | 1.0 | 0.14422 | 0.51943 | 0.37769 | 1.0000 |
| Si | Si19 | 1.0 | 0.79185 | 0.65679 | 0.79921 | 1.0000 |
| Si | Si20 | 1.0 | 0.54332 | 0.65885 | 0.80803 | 1.0000 |
| Si | Si21 | 1.0 | 0.77849 | 0.29450 | 0.81220 | 1.0000 |
| Si | Si22 | 1.0 | 0.52312 | 0.28295 | 0.80265 | 1.0000 |
| Si | Si23 | 1.0 | 0.52661 | 0.04293 | 0.80946 | 1.0000 |
| Si | Si24 | 1.0 | 0.85596 | 0.48771 | 0.87548 | 1.0000 |
| Si | Si25 | 1.0 | 0.65200 | 0.79263 | 0.95075 | 1.0000 |
| Si | Si26 | 1.0 | 0.65906 | 0.54240 | 0.94276 | 1.0000 |
| Si | Si27 | 1.0 | 0.29011 | 0.77749 | 0.93788 | 1.0000 |
| Si | Si28 | 1.0 | 0.28439 | 0.52115 | 0.94743 | 1.0000 |
| Si | Si29 | 1.0 | 0.04874 | 0.78438 | 0.93955 | 1.0000 |
| Si | Si30 | 1.0 | 0.04680 | 0.52581 | 0.94256 | 1.0000 |
| Si | Si31 | 1.0 | 0.48216 | 0.85289 | 0.87610 | 1.0000 |
| Si | Si32 | 1.0 | 0.33991 | 0.20485 | 0.44654 | 1.0000 |
| Si | Si33 | 1.0 | 0.34119 | 0.45628 | 0.44284 | 1.0000 |
| Si | Si34 | 1.0 | 0.71858 | 0.48219 | 0.44865 | 1.0000 |
| Si | Si35 | 1.0 | 0.95626 | 0.48367 | 0.44418 | 1.0000 |
| Si | Si36 | 1.0 | 0.51205 | 0.14636 | 0.37136 | 1.0000 |
| Si | Si37 | 1.0 | 0.54056 | 0.33967 | 0.69065 | 1.0000 |
| Si | Si38 | 1.0 | 0.78596 | 0.72460 | 0.68917 | 1.0000 |

|    |      |     |         |         |         |        |
|----|------|-----|---------|---------|---------|--------|
| Si | Si39 | 1.0 | 0.52889 | 0.71643 | 0.69766 | 1.0000 |
| Si | Si40 | 1.0 | 0.78528 | 0.96850 | 0.69899 | 1.0000 |
| Si | Si41 | 1.0 | 0.52726 | 0.95919 | 0.69865 | 1.0000 |
| Si | Si42 | 1.0 | 0.45976 | 0.65958 | 0.19074 | 1.0000 |
| Si | Si43 | 1.0 | 0.20794 | 0.27171 | 0.19216 | 1.0000 |
| Si | Si44 | 1.0 | 0.46500 | 0.28747 | 0.19594 | 1.0000 |
| Si | Si45 | 1.0 | 0.21668 | 0.02700 | 0.20123 | 1.0000 |
| Si | Si46 | 1.0 | 0.47450 | 0.04381 | 0.19664 | 1.0000 |
| Si | Si47 | 1.0 | 0.16096 | 0.83893 | 0.12511 | 1.0000 |
| Si | Si48 | 1.0 | 0.53365 | 0.46727 | 0.12288 | 1.0000 |
| Si | Si49 | 1.0 | 0.84068 | 0.15992 | 0.62521 | 1.0000 |
| Si | Si50 | 1.0 | 0.46760 | 0.53083 | 0.62745 | 1.0000 |
| Si | Si51 | 1.0 | 0.15072 | 0.14826 | 0.37296 | 1.0000 |
| Si | Si52 | 1.0 | 0.53036 | 0.52921 | 0.37530 | 1.0000 |
| Si | Si53 | 1.0 | 0.47102 | 0.46980 | 0.87513 | 1.0000 |
| Si | Si54 | 1.0 | 0.79181 | 0.35435 | 0.70139 | 1.0000 |
| Si | Si55 | 1.0 | 0.35286 | 0.79373 | 0.04860 | 1.0000 |
| Si | Si56 | 1.0 | 0.20885 | 0.64726 | 0.20167 | 1.0000 |
| Si | Si57 | 1.0 | 0.78131 | 0.05264 | 0.80873 | 1.0000 |
| Si | Si58 | 1.0 | 0.70480 | 0.22646 | 0.43620 | 1.0000 |

T2T2T7T7T9

data\_image0

\_chemical\_formula\_structural H6O128Al6Si58  
\_chemical\_formula\_sum "H6 O128 Al6 Si58"  
\_cell\_length\_a 12.5599  
\_cell\_length\_b 12.5646  
\_cell\_length\_c 26.5478  
\_cell\_angle\_alpha 90.0523  
\_cell\_angle\_beta 89.6901  
\_cell\_angle\_gamma 90.2314

\_space\_group\_name\_H-M\_alt "P 1"  
\_space\_group\_IT\_number 1

loop\_

\_space\_group\_symop\_operation\_xyz  
'x, y, z'

loop\_

\_atom\_site\_type\_symbol  
\_atom\_site\_label  
\_atom\_site\_symmetry\_multiplicity  
\_atom\_site\_fract\_x  
\_atom\_site\_fract\_y  
\_atom\_site\_fract\_z  
\_atom\_site\_occupancy  
H H1 1.0 0.48603 0.14948 0.53234 1.0000  
H H2 1.0 0.86162 0.51387 0.71583 1.0000  
H H3 1.0 0.56770 0.83554 0.34558 1.0000  
H H4 1.0 0.06453 0.01992 0.14296 1.0000  
H H5 1.0 0.47786 0.84597 0.95923 1.0000  
H H6 1.0 0.16714 0.41410 0.91444 1.0000  
O O1 1.0 0.30224 0.67245 0.05936 1.0000  
O O2 1.0 0.34446 0.81898 0.98772 1.0000

;



|   |     |     |         |         |         |        |
|---|-----|-----|---------|---------|---------|--------|
| O | O3  | 1.0 | 0.24144 | 0.87158 | 0.07357 | 1.0000 |
| O | O4  | 1.0 | 0.44930 | 0.82348 | 0.07121 | 1.0000 |
| O | O5  | 1.0 | 0.33747 | 0.50256 | 0.00151 | 1.0000 |
| O | O6  | 1.0 | 0.21834 | 0.48406 | 0.08241 | 1.0000 |
| O | O7  | 1.0 | 0.42757 | 0.51454 | 0.08950 | 1.0000 |
| O | O8  | 1.0 | 0.67852 | 0.65632 | 0.06306 | 1.0000 |
| O | O9  | 1.0 | 0.82987 | 0.80760 | 0.06958 | 1.0000 |
| O | O10 | 1.0 | 0.64138 | 0.84436 | 0.10500 | 1.0000 |
| O | O11 | 1.0 | 0.82668 | 0.50437 | 0.06840 | 1.0000 |
| O | O12 | 1.0 | 0.63103 | 0.46193 | 0.09275 | 1.0000 |
| O | O13 | 1.0 | 0.97597 | 0.65531 | 0.06166 | 1.0000 |
| O | O14 | 1.0 | 0.02213 | 0.84030 | 0.10413 | 1.0000 |
| O | O15 | 1.0 | 0.01228 | 0.47177 | 0.10665 | 1.0000 |
| O | O16 | 1.0 | 0.64010 | 0.33540 | 0.55183 | 1.0000 |
| O | O17 | 1.0 | 0.68704 | 0.17631 | 0.48936 | 1.0000 |
| O | O18 | 1.0 | 0.74167 | 0.16103 | 0.58618 | 1.0000 |
| O | O19 | 1.0 | 0.53999 | 0.14854 | 0.55959 | 1.0000 |
| O | O20 | 1.0 | 0.67978 | 0.51184 | 0.49971 | 1.0000 |
| O | O21 | 1.0 | 0.77360 | 0.47756 | 0.58899 | 1.0000 |
| O | O22 | 1.0 | 0.56418 | 0.52086 | 0.58077 | 1.0000 |
| O | O23 | 1.0 | 0.28467 | 0.33175 | 0.57043 | 1.0000 |
| O | O24 | 1.0 | 0.15532 | 0.16397 | 0.55594 | 1.0000 |
| O | O25 | 1.0 | 0.33760 | 0.14411 | 0.60596 | 1.0000 |
| O | O26 | 1.0 | 0.17535 | 0.50452 | 0.55012 | 1.0000 |
| O | O27 | 1.0 | 0.35634 | 0.52216 | 0.60077 | 1.0000 |
| O | O28 | 1.0 | 0.04000 | 0.33893 | 0.55276 | 1.0000 |
| O | O29 | 1.0 | 0.95527 | 0.15973 | 0.58981 | 1.0000 |
| O | O30 | 1.0 | 0.99937 | 0.51143 | 0.60616 | 1.0000 |
| O | O31 | 1.0 | 0.34481 | 0.38052 | 0.30942 | 1.0000 |
| O | O32 | 1.0 | 0.16891 | 0.34549 | 0.25556 | 1.0000 |
| O | O33 | 1.0 | 0.21044 | 0.22388 | 0.33426 | 1.0000 |
| O | O34 | 1.0 | 0.15355 | 0.42849 | 0.34568 | 1.0000 |
| O | O35 | 1.0 | 0.50361 | 0.32750 | 0.24597 | 1.0000 |
| O | O36 | 1.0 | 0.48411 | 0.23205 | 0.33420 | 1.0000 |

|   |     |     |         |         |         |        |
|---|-----|-----|---------|---------|---------|--------|
| O | O37 | 1.0 | 0.54420 | 0.43697 | 0.32799 | 1.0000 |
| O | O38 | 1.0 | 0.33778 | 0.72905 | 0.30482 | 1.0000 |
| O | O39 | 1.0 | 0.15633 | 0.83247 | 0.31448 | 1.0000 |
| O | O40 | 1.0 | 0.17562 | 0.64077 | 0.35237 | 1.0000 |
| O | O41 | 1.0 | 0.49971 | 0.63673 | 0.35356 | 1.0000 |
| O | O42 | 1.0 | 0.32367 | 0.96604 | 0.31189 | 1.0000 |
| O | O43 | 1.0 | 0.13793 | 0.02713 | 0.35003 | 1.0000 |
| O | O44 | 1.0 | 0.52549 | 0.03016 | 0.35216 | 1.0000 |
| O | O45 | 1.0 | 0.68039 | 0.62711 | 0.81011 | 1.0000 |
| O | O46 | 1.0 | 0.83439 | 0.66235 | 0.74164 | 1.0000 |
| O | O47 | 1.0 | 0.84241 | 0.75813 | 0.83172 | 1.0000 |
| O | O48 | 1.0 | 0.87181 | 0.54792 | 0.82042 | 1.0000 |
| O | O49 | 1.0 | 0.51965 | 0.65062 | 0.74643 | 1.0000 |
| O | O50 | 1.0 | 0.53233 | 0.76891 | 0.83127 | 1.0000 |
| O | O51 | 1.0 | 0.48521 | 0.56331 | 0.83295 | 1.0000 |
| O | O52 | 1.0 | 0.65739 | 0.32217 | 0.80871 | 1.0000 |
| O | O53 | 1.0 | 0.79661 | 0.16186 | 0.82421 | 1.0000 |
| O | O54 | 1.0 | 0.83660 | 0.35252 | 0.85554 | 1.0000 |
| O | O55 | 1.0 | 0.51571 | 0.16635 | 0.81431 | 1.0000 |
| O | O56 | 1.0 | 0.46540 | 0.35467 | 0.84548 | 1.0000 |
| O | O57 | 1.0 | 0.65574 | 0.00648 | 0.80958 | 1.0000 |
| O | O58 | 1.0 | 0.84548 | 0.96644 | 0.84829 | 1.0000 |
| O | O59 | 1.0 | 0.46077 | 0.98026 | 0.84612 | 1.0000 |
| O | O60 | 1.0 | 0.63731 | 0.66424 | 0.93990 | 1.0000 |
| O | O61 | 1.0 | 0.66895 | 0.82567 | 0.00512 | 1.0000 |
| O | O62 | 1.0 | 0.74015 | 0.84049 | 0.91049 | 1.0000 |
| O | O63 | 1.0 | 0.67874 | 0.49676 | 0.99699 | 1.0000 |
| O | O64 | 1.0 | 0.78244 | 0.52409 | 0.91060 | 1.0000 |
| O | O65 | 1.0 | 0.57482 | 0.47077 | 0.91259 | 1.0000 |
| O | O66 | 1.0 | 0.26198 | 0.65373 | 0.94140 | 1.0000 |
| O | O67 | 1.0 | 0.15207 | 0.83340 | 0.94225 | 1.0000 |
| O | O68 | 1.0 | 0.33341 | 0.81685 | 0.88858 | 1.0000 |
| O | O69 | 1.0 | 0.36332 | 0.48102 | 0.90345 | 1.0000 |
| O | O70 | 1.0 | 0.02765 | 0.66229 | 0.94529 | 1.0000 |

|   |      |     |         |         |         |        |
|---|------|-----|---------|---------|---------|--------|
| O | O71  | 1.0 | 0.95399 | 0.84288 | 0.90735 | 1.0000 |
| O | O72  | 1.0 | 0.98415 | 0.46574 | 0.89642 | 1.0000 |
| O | O73  | 1.0 | 0.31777 | 0.32207 | 0.43598 | 1.0000 |
| O | O74  | 1.0 | 0.34500 | 0.17608 | 0.50857 | 1.0000 |
| O | O75  | 1.0 | 0.24249 | 0.12942 | 0.42264 | 1.0000 |
| O | O76  | 1.0 | 0.45491 | 0.15884 | 0.42670 | 1.0000 |
| O | O77  | 1.0 | 0.36225 | 0.47112 | 0.50495 | 1.0000 |
| O | O78  | 1.0 | 0.24873 | 0.51861 | 0.42431 | 1.0000 |
| O | O79  | 1.0 | 0.45531 | 0.47702 | 0.41686 | 1.0000 |
| O | O80  | 1.0 | 0.71045 | 0.35346 | 0.43583 | 1.0000 |
| O | O81  | 1.0 | 0.84570 | 0.19254 | 0.42283 | 1.0000 |
| O | O82  | 1.0 | 0.65040 | 0.17630 | 0.39075 | 1.0000 |
| O | O83  | 1.0 | 0.84250 | 0.52127 | 0.43490 | 1.0000 |
| O | O84  | 1.0 | 0.65192 | 0.54063 | 0.40051 | 1.0000 |
| O | O85  | 1.0 | 0.97479 | 0.35648 | 0.44110 | 1.0000 |
| O | O86  | 1.0 | 0.04569 | 0.18584 | 0.39525 | 1.0000 |
| O | O87  | 1.0 | 0.04095 | 0.54475 | 0.40982 | 1.0000 |
| O | O88  | 1.0 | 0.67231 | 0.36238 | 0.69554 | 1.0000 |
| O | O89  | 1.0 | 0.83532 | 0.31344 | 0.75634 | 1.0000 |
| O | O90  | 1.0 | 0.84477 | 0.26116 | 0.65918 | 1.0000 |
| O | O91  | 1.0 | 0.49351 | 0.32286 | 0.74691 | 1.0000 |
| O | O92  | 1.0 | 0.52727 | 0.23688 | 0.65577 | 1.0000 |
| O | O93  | 1.0 | 0.48931 | 0.44527 | 0.66809 | 1.0000 |
| O | O94  | 1.0 | 0.67164 | 0.72047 | 0.68476 | 1.0000 |
| O | O95  | 1.0 | 0.84136 | 0.85009 | 0.69284 | 1.0000 |
| O | O96  | 1.0 | 0.85470 | 0.66642 | 0.64324 | 1.0000 |
| O | O97  | 1.0 | 0.49759 | 0.83374 | 0.69842 | 1.0000 |
| O | O98  | 1.0 | 0.48524 | 0.65263 | 0.64865 | 1.0000 |
| O | O99  | 1.0 | 0.66677 | 0.96520 | 0.69542 | 1.0000 |
| O | O100 | 1.0 | 0.84277 | 0.04651 | 0.65405 | 1.0000 |
| O | O101 | 1.0 | 0.49425 | 0.00959 | 0.64517 | 1.0000 |
| O | O102 | 1.0 | 0.34134 | 0.62604 | 0.19484 | 1.0000 |
| O | O103 | 1.0 | 0.17220 | 0.66233 | 0.25346 | 1.0000 |
| O | O104 | 1.0 | 0.20247 | 0.77880 | 0.17066 | 1.0000 |

|    |      |     |         |         |         |        |
|----|------|-----|---------|---------|---------|--------|
| O  | O105 | 1.0 | 0.14701 | 0.57198 | 0.16689 | 1.0000 |
| O  | O106 | 1.0 | 0.50894 | 0.66826 | 0.25339 | 1.0000 |
| O  | O107 | 1.0 | 0.48941 | 0.76692 | 0.16633 | 1.0000 |
| O  | O108 | 1.0 | 0.53606 | 0.55855 | 0.17105 | 1.0000 |
| O  | O109 | 1.0 | 0.32747 | 0.28861 | 0.19577 | 1.0000 |
| O  | O110 | 1.0 | 0.15327 | 0.17193 | 0.19789 | 1.0000 |
| O  | O111 | 1.0 | 0.14800 | 0.36032 | 0.15633 | 1.0000 |
| O  | O112 | 1.0 | 0.49178 | 0.16055 | 0.18284 | 1.0000 |
| O  | O113 | 1.0 | 0.49798 | 0.35508 | 0.14695 | 1.0000 |
| O  | O114 | 1.0 | 0.32057 | 0.03624 | 0.18925 | 1.0000 |
| O  | O115 | 1.0 | 0.49224 | 0.97039 | 0.14177 | 1.0000 |
| O  | O116 | 1.0 | 0.98754 | 0.82947 | 0.00483 | 1.0000 |
| O  | O117 | 1.0 | 0.99343 | 0.47828 | 0.00699 | 1.0000 |
| O  | O118 | 1.0 | 0.99411 | 0.17638 | 0.49274 | 1.0000 |
| O  | O119 | 1.0 | 0.98854 | 0.51678 | 0.50626 | 1.0000 |
| O  | O120 | 1.0 | 0.15617 | 0.99453 | 0.25190 | 1.0000 |
| O  | O121 | 1.0 | 0.49509 | 0.98958 | 0.24234 | 1.0000 |
| O  | O122 | 1.0 | 0.83084 | 0.02108 | 0.75202 | 1.0000 |
| O  | O123 | 1.0 | 0.49278 | 0.01656 | 0.74637 | 1.0000 |
| O  | O124 | 1.0 | 0.85747 | 0.46277 | 0.68746 | 1.0000 |
| O  | O125 | 1.0 | 0.51452 | 0.83074 | 0.31900 | 1.0000 |
| O  | O126 | 1.0 | 0.13327 | 0.99019 | 0.15239 | 1.0000 |
| O  | O127 | 1.0 | 0.53214 | 0.84627 | 0.93158 | 1.0000 |
| O  | O128 | 1.0 | 0.17088 | 0.47016 | 0.93989 | 1.0000 |
| Al | Al1  | 1.0 | 0.46873 | 0.13399 | 0.62345 | 1.0000 |
| Al | Al2  | 1.0 | 0.87136 | 0.53652 | 0.62502 | 1.0000 |
| Al | Al3  | 1.0 | 0.45887 | 0.96720 | 0.30399 | 1.0000 |
| Al | Al4  | 1.0 | 0.15204 | 0.85548 | 0.12260 | 1.0000 |
| Al | Al5  | 1.0 | 0.45865 | 0.85305 | 0.86827 | 1.0000 |
| Al | Al6  | 1.0 | 0.03225 | 0.52703 | 0.94946 | 1.0000 |
| Si | Si1  | 1.0 | 0.33135 | 0.79826 | 0.04896 | 1.0000 |
| Si | Si2  | 1.0 | 0.32130 | 0.54476 | 0.05928 | 1.0000 |
| Si | Si3  | 1.0 | 0.70610 | 0.78272 | 0.06068 | 1.0000 |
| Si | Si4  | 1.0 | 0.70525 | 0.53074 | 0.05474 | 1.0000 |

|    |      |     |         |         |         |        |
|----|------|-----|---------|---------|---------|--------|
| Si | Si5  | 1.0 | 0.95570 | 0.78303 | 0.06027 | 1.0000 |
| Si | Si6  | 1.0 | 0.95258 | 0.52781 | 0.05922 | 1.0000 |
| Si | Si7  | 1.0 | 0.51694 | 0.85131 | 0.12162 | 1.0000 |
| Si | Si8  | 1.0 | 0.65811 | 0.20954 | 0.54675 | 1.0000 |
| Si | Si9  | 1.0 | 0.66756 | 0.46331 | 0.55665 | 1.0000 |
| Si | Si10 | 1.0 | 0.27801 | 0.20384 | 0.56171 | 1.0000 |
| Si | Si11 | 1.0 | 0.29394 | 0.45743 | 0.55729 | 1.0000 |
| Si | Si12 | 1.0 | 0.03618 | 0.21111 | 0.54846 | 1.0000 |
| Si | Si13 | 1.0 | 0.05083 | 0.46839 | 0.55523 | 1.0000 |
| Si | Si14 | 1.0 | 0.21962 | 0.34415 | 0.31190 | 1.0000 |
| Si | Si15 | 1.0 | 0.46921 | 0.34311 | 0.30453 | 1.0000 |
| Si | Si16 | 1.0 | 0.20810 | 0.71603 | 0.30607 | 1.0000 |
| Si | Si17 | 1.0 | 0.19736 | 0.95489 | 0.30756 | 1.0000 |
| Si | Si18 | 1.0 | 0.15523 | 0.53171 | 0.38279 | 1.0000 |
| Si | Si19 | 1.0 | 0.80596 | 0.65184 | 0.80165 | 1.0000 |
| Si | Si20 | 1.0 | 0.55406 | 0.65639 | 0.80524 | 1.0000 |
| Si | Si21 | 1.0 | 0.78071 | 0.28599 | 0.81122 | 1.0000 |
| Si | Si22 | 1.0 | 0.53244 | 0.29012 | 0.80291 | 1.0000 |
| Si | Si23 | 1.0 | 0.78074 | 0.03831 | 0.80816 | 1.0000 |
| Si | Si24 | 1.0 | 0.52987 | 0.04006 | 0.80411 | 1.0000 |
| Si | Si25 | 1.0 | 0.86961 | 0.47292 | 0.87101 | 1.0000 |
| Si | Si26 | 1.0 | 0.66949 | 0.53798 | 0.93937 | 1.0000 |
| Si | Si27 | 1.0 | 0.27062 | 0.78381 | 0.93822 | 1.0000 |
| Si | Si28 | 1.0 | 0.02989 | 0.78906 | 0.94990 | 1.0000 |
| Si | Si29 | 1.0 | 0.33947 | 0.19660 | 0.44788 | 1.0000 |
| Si | Si30 | 1.0 | 0.34549 | 0.44742 | 0.44578 | 1.0000 |
| Si | Si31 | 1.0 | 0.72363 | 0.22548 | 0.43477 | 1.0000 |
| Si | Si32 | 1.0 | 0.72135 | 0.48125 | 0.44380 | 1.0000 |
| Si | Si33 | 1.0 | 0.96558 | 0.22816 | 0.43849 | 1.0000 |
| Si | Si34 | 1.0 | 0.96212 | 0.48402 | 0.44879 | 1.0000 |
| Si | Si35 | 1.0 | 0.52848 | 0.14748 | 0.37567 | 1.0000 |
| Si | Si36 | 1.0 | 0.54364 | 0.33904 | 0.69063 | 1.0000 |
| Si | Si37 | 1.0 | 0.80035 | 0.72697 | 0.68938 | 1.0000 |
| Si | Si38 | 1.0 | 0.54404 | 0.71466 | 0.69443 | 1.0000 |

|    |      |     |         |         |         |        |
|----|------|-----|---------|---------|---------|--------|
| Si | Si39 | 1.0 | 0.79441 | 0.97002 | 0.69831 | 1.0000 |
| Si | Si40 | 1.0 | 0.53705 | 0.95708 | 0.69574 | 1.0000 |
| Si | Si41 | 1.0 | 0.21565 | 0.66321 | 0.19529 | 1.0000 |
| Si | Si42 | 1.0 | 0.46745 | 0.65552 | 0.19509 | 1.0000 |
| Si | Si43 | 1.0 | 0.19975 | 0.29354 | 0.20137 | 1.0000 |
| Si | Si44 | 1.0 | 0.45605 | 0.28235 | 0.19302 | 1.0000 |
| Si | Si45 | 1.0 | 0.45198 | 0.03785 | 0.19051 | 1.0000 |
| Si | Si46 | 1.0 | 0.13182 | 0.47368 | 0.12822 | 1.0000 |
| Si | Si47 | 1.0 | 0.52279 | 0.47273 | 0.12521 | 1.0000 |
| Si | Si48 | 1.0 | 0.84641 | 0.15639 | 0.62260 | 1.0000 |
| Si | Si49 | 1.0 | 0.47479 | 0.53446 | 0.62469 | 1.0000 |
| Si | Si50 | 1.0 | 0.15928 | 0.14203 | 0.37586 | 1.0000 |
| Si | Si51 | 1.0 | 0.53741 | 0.52071 | 0.37472 | 1.0000 |
| Si | Si52 | 1.0 | 0.84661 | 0.85046 | 0.87460 | 1.0000 |
| Si | Si53 | 1.0 | 0.47592 | 0.46847 | 0.87322 | 1.0000 |
| Si | Si54 | 1.0 | 0.79803 | 0.34372 | 0.70000 | 1.0000 |
| Si | Si55 | 1.0 | 0.46264 | 0.70788 | 0.30678 | 1.0000 |
| Si | Si56 | 1.0 | 0.19663 | 0.05125 | 0.20114 | 1.0000 |
| Si | Si57 | 1.0 | 0.65103 | 0.79136 | 0.94709 | 1.0000 |
| Si | Si58 | 1.0 | 0.29086 | 0.53106 | 0.94675 | 1.0000 |

T2T7T7T7T7T9

data\_image0

\_chemical\_formula\_structural H6O128Al6Si58  
\_chemical\_formula\_sum "H6 O128 Al6 Si58"  
\_cell\_length\_a 12.5819  
\_cell\_length\_b 12.515  
\_cell\_length\_c 26.5294  
\_cell\_angle\_alpha 89.7471  
\_cell\_angle\_beta 90.1765  
\_cell\_angle\_gamma 90.1434

\_space\_group\_name\_H-M\_alt "P 1"  
\_space\_group\_IT\_number 1

loop\_

\_space\_group\_symop\_operation\_xyz  
'x, y, z'

loop\_

\_atom\_site\_type\_symbol  
\_atom\_site\_label  
\_atom\_site\_symmetry\_multiplicity  
\_atom\_site\_fract\_x  
\_atom\_site\_fract\_y  
\_atom\_site\_fract\_z  
\_atom\_site\_occupancy  
H H1 1.0 0.48315 0.13797 0.53423 1.0000  
H H2 1.0 0.85713 0.51605 0.71482 1.0000  
H H3 1.0 0.58137 0.83452 0.34421 1.0000  
H H4 1.0 0.08740 0.01975 0.13351 1.0000  
H H5 1.0 0.47704 0.85123 0.95828 1.0000  
H H6 1.0 0.15036 0.52706 0.29158 1.0000  
O O1 1.0 0.37228 0.66563 0.05362 1.0000  
O O2 1.0 0.34246 0.82407 0.98525 1.0000

;

|   |     |     |         |         |         |        |
|---|-----|-----|---------|---------|---------|--------|
| O | O3  | 1.0 | 0.24246 | 0.82877 | 0.07482 | 1.0000 |
| O | O4  | 1.0 | 0.45240 | 0.85787 | 0.06521 | 1.0000 |
| O | O5  | 1.0 | 0.33002 | 0.48589 | 0.00323 | 1.0000 |
| O | O6  | 1.0 | 0.21746 | 0.53750 | 0.08469 | 1.0000 |
| O | O7  | 1.0 | 0.41728 | 0.47371 | 0.09259 | 1.0000 |
| O | O8  | 1.0 | 0.70388 | 0.65259 | 0.05928 | 1.0000 |
| O | O9  | 1.0 | 0.83129 | 0.82296 | 0.06615 | 1.0000 |
| O | O10 | 1.0 | 0.64185 | 0.82679 | 0.10561 | 1.0000 |
| O | O11 | 1.0 | 0.83046 | 0.48468 | 0.06853 | 1.0000 |
| O | O12 | 1.0 | 0.63009 | 0.46706 | 0.09137 | 1.0000 |
| O | O13 | 1.0 | 0.95945 | 0.65447 | 0.06120 | 1.0000 |
| O | O14 | 1.0 | 0.02453 | 0.83760 | 0.10172 | 1.0000 |
| O | O15 | 1.0 | 0.02146 | 0.47543 | 0.10551 | 1.0000 |
| O | O16 | 1.0 | 0.62878 | 0.33383 | 0.55353 | 1.0000 |
| O | O17 | 1.0 | 0.67804 | 0.17406 | 0.49152 | 1.0000 |
| O | O18 | 1.0 | 0.73793 | 0.16134 | 0.58787 | 1.0000 |
| O | O19 | 1.0 | 0.53523 | 0.14399 | 0.56220 | 1.0000 |
| O | O20 | 1.0 | 0.66877 | 0.51501 | 0.50332 | 1.0000 |
| O | O21 | 1.0 | 0.77074 | 0.46830 | 0.58956 | 1.0000 |
| O | O22 | 1.0 | 0.56386 | 0.52167 | 0.58682 | 1.0000 |
| O | O23 | 1.0 | 0.28368 | 0.33136 | 0.56187 | 1.0000 |
| O | O24 | 1.0 | 0.14972 | 0.16482 | 0.55621 | 1.0000 |
| O | O25 | 1.0 | 0.33183 | 0.15065 | 0.60768 | 1.0000 |
| O | O26 | 1.0 | 0.17181 | 0.50781 | 0.55367 | 1.0000 |
| O | O27 | 1.0 | 0.35502 | 0.51597 | 0.60108 | 1.0000 |
| O | O28 | 1.0 | 0.03542 | 0.34166 | 0.55599 | 1.0000 |
| O | O29 | 1.0 | 0.95166 | 0.15977 | 0.59146 | 1.0000 |
| O | O30 | 1.0 | 0.99203 | 0.52119 | 0.60296 | 1.0000 |
| O | O31 | 1.0 | 0.34063 | 0.37966 | 0.30542 | 1.0000 |
| O | O32 | 1.0 | 0.17469 | 0.34035 | 0.24404 | 1.0000 |
| O | O33 | 1.0 | 0.17578 | 0.26158 | 0.33745 | 1.0000 |
| O | O34 | 1.0 | 0.51101 | 0.31547 | 0.25447 | 1.0000 |
| O | O35 | 1.0 | 0.45900 | 0.22162 | 0.34050 | 1.0000 |
| O | O36 | 1.0 | 0.53647 | 0.42236 | 0.33780 | 1.0000 |



|   |     |     |         |         |         |        |
|---|-----|-----|---------|---------|---------|--------|
| O | O37 | 1.0 | 0.34962 | 0.74196 | 0.30085 | 1.0000 |
| O | O38 | 1.0 | 0.17050 | 0.84882 | 0.31047 | 1.0000 |
| O | O39 | 1.0 | 0.19898 | 0.66564 | 0.36183 | 1.0000 |
| O | O40 | 1.0 | 0.51406 | 0.63279 | 0.34303 | 1.0000 |
| O | O41 | 1.0 | 0.33874 | 0.97989 | 0.31095 | 1.0000 |
| O | O42 | 1.0 | 0.15205 | 0.04981 | 0.34326 | 1.0000 |
| O | O43 | 1.0 | 0.54492 | 0.02901 | 0.34962 | 1.0000 |
| O | O44 | 1.0 | 0.67457 | 0.61366 | 0.80905 | 1.0000 |
| O | O45 | 1.0 | 0.82836 | 0.65300 | 0.74121 | 1.0000 |
| O | O46 | 1.0 | 0.82684 | 0.75867 | 0.82814 | 1.0000 |
| O | O47 | 1.0 | 0.87221 | 0.54987 | 0.82399 | 1.0000 |
| O | O48 | 1.0 | 0.50842 | 0.64825 | 0.74922 | 1.0000 |
| O | O49 | 1.0 | 0.53806 | 0.76464 | 0.83338 | 1.0000 |
| O | O50 | 1.0 | 0.47740 | 0.56222 | 0.83713 | 1.0000 |
| O | O51 | 1.0 | 0.65823 | 0.32557 | 0.81337 | 1.0000 |
| O | O52 | 1.0 | 0.79290 | 0.15892 | 0.82512 | 1.0000 |
| O | O53 | 1.0 | 0.84391 | 0.34905 | 0.85619 | 1.0000 |
| O | O54 | 1.0 | 0.52357 | 0.16408 | 0.81916 | 1.0000 |
| O | O55 | 1.0 | 0.46216 | 0.35173 | 0.84680 | 1.0000 |
| O | O56 | 1.0 | 0.65480 | 0.99901 | 0.81208 | 1.0000 |
| O | O57 | 1.0 | 0.84553 | 0.96345 | 0.85080 | 1.0000 |
| O | O58 | 1.0 | 0.45703 | 0.97595 | 0.84525 | 1.0000 |
| O | O59 | 1.0 | 0.63003 | 0.66043 | 0.94174 | 1.0000 |
| O | O60 | 1.0 | 0.66320 | 0.82393 | 0.00519 | 1.0000 |
| O | O61 | 1.0 | 0.73990 | 0.83321 | 0.91199 | 1.0000 |
| O | O62 | 1.0 | 0.68180 | 0.48938 | 0.99668 | 1.0000 |
| O | O63 | 1.0 | 0.76535 | 0.51739 | 0.90748 | 1.0000 |
| O | O64 | 1.0 | 0.55827 | 0.46727 | 0.91810 | 1.0000 |
| O | O65 | 1.0 | 0.27015 | 0.64807 | 0.94622 | 1.0000 |
| O | O66 | 1.0 | 0.15130 | 0.82154 | 0.93756 | 1.0000 |
| O | O67 | 1.0 | 0.33329 | 0.80660 | 0.88617 | 1.0000 |
| O | O68 | 1.0 | 0.15766 | 0.47288 | 0.94530 | 1.0000 |
| O | O69 | 1.0 | 0.34848 | 0.47173 | 0.90409 | 1.0000 |
| O | O70 | 1.0 | 0.03116 | 0.64862 | 0.94772 | 1.0000 |

|   |      |     |         |         |         |        |
|---|------|-----|---------|---------|---------|--------|
| O | O71  | 1.0 | 0.95123 | 0.82115 | 0.90405 | 1.0000 |
| O | O72  | 1.0 | 0.97022 | 0.46937 | 0.90557 | 1.0000 |
| O | O73  | 1.0 | 0.37517 | 0.31760 | 0.44187 | 1.0000 |
| O | O74  | 1.0 | 0.33862 | 0.16143 | 0.50895 | 1.0000 |
| O | O75  | 1.0 | 0.23857 | 0.15888 | 0.42001 | 1.0000 |
| O | O76  | 1.0 | 0.44836 | 0.12304 | 0.42820 | 1.0000 |
| O | O77  | 1.0 | 0.35161 | 0.48583 | 0.50256 | 1.0000 |
| O | O78  | 1.0 | 0.23041 | 0.46208 | 0.41876 | 1.0000 |
| O | O79  | 1.0 | 0.43445 | 0.51224 | 0.41452 | 1.0000 |
| O | O80  | 1.0 | 0.70844 | 0.35599 | 0.44219 | 1.0000 |
| O | O81  | 1.0 | 0.83506 | 0.19013 | 0.42461 | 1.0000 |
| O | O82  | 1.0 | 0.63709 | 0.19035 | 0.39342 | 1.0000 |
| O | O83  | 1.0 | 0.83396 | 0.52639 | 0.43982 | 1.0000 |
| O | O84  | 1.0 | 0.64325 | 0.54085 | 0.40438 | 1.0000 |
| O | O85  | 1.0 | 0.96426 | 0.35701 | 0.43701 | 1.0000 |
| O | O86  | 1.0 | 0.03293 | 0.17500 | 0.39730 | 1.0000 |
| O | O87  | 1.0 | 0.02299 | 0.54727 | 0.40242 | 1.0000 |
| O | O88  | 1.0 | 0.67035 | 0.36417 | 0.69633 | 1.0000 |
| O | O89  | 1.0 | 0.83176 | 0.31333 | 0.75770 | 1.0000 |
| O | O90  | 1.0 | 0.84184 | 0.25882 | 0.66126 | 1.0000 |
| O | O91  | 1.0 | 0.49668 | 0.31626 | 0.74931 | 1.0000 |
| O | O92  | 1.0 | 0.52551 | 0.23711 | 0.65690 | 1.0000 |
| O | O93  | 1.0 | 0.48356 | 0.44495 | 0.67252 | 1.0000 |
| O | O94  | 1.0 | 0.66161 | 0.71760 | 0.68865 | 1.0000 |
| O | O95  | 1.0 | 0.83328 | 0.84548 | 0.69464 | 1.0000 |
| O | O96  | 1.0 | 0.83951 | 0.66435 | 0.64253 | 1.0000 |
| O | O97  | 1.0 | 0.49165 | 0.83484 | 0.70221 | 1.0000 |
| O | O98  | 1.0 | 0.47414 | 0.65270 | 0.65153 | 1.0000 |
| O | O99  | 1.0 | 0.66194 | 0.96531 | 0.69491 | 1.0000 |
| O | O100 | 1.0 | 0.84019 | 0.04380 | 0.65543 | 1.0000 |
| O | O101 | 1.0 | 0.48463 | 0.00932 | 0.64702 | 1.0000 |
| O | O102 | 1.0 | 0.33738 | 0.62803 | 0.19626 | 1.0000 |
| O | O103 | 1.0 | 0.17850 | 0.65645 | 0.26266 | 1.0000 |
| O | O104 | 1.0 | 0.18662 | 0.77348 | 0.17764 | 1.0000 |

|    |      |     |         |         |         |        |
|----|------|-----|---------|---------|---------|--------|
| O  | O105 | 1.0 | 0.14167 | 0.56210 | 0.17751 | 1.0000 |
| O  | O106 | 1.0 | 0.51371 | 0.68430 | 0.24529 | 1.0000 |
| O  | O107 | 1.0 | 0.46536 | 0.77872 | 0.15835 | 1.0000 |
| O  | O108 | 1.0 | 0.52947 | 0.57592 | 0.16214 | 1.0000 |
| O  | O109 | 1.0 | 0.34661 | 0.29285 | 0.19326 | 1.0000 |
| O  | O110 | 1.0 | 0.17491 | 0.17315 | 0.18215 | 1.0000 |
| O  | O111 | 1.0 | 0.17853 | 0.36652 | 0.14388 | 1.0000 |
| O  | O112 | 1.0 | 0.50979 | 0.16237 | 0.18489 | 1.0000 |
| O  | O113 | 1.0 | 0.53085 | 0.36278 | 0.15864 | 1.0000 |
| O  | O114 | 1.0 | 0.33969 | 0.03398 | 0.18193 | 1.0000 |
| O  | O115 | 1.0 | 0.52055 | 0.97953 | 0.13993 | 1.0000 |
| O  | O116 | 1.0 | 0.99077 | 0.82211 | 0.00194 | 1.0000 |
| O  | O117 | 1.0 | 0.99222 | 0.48080 | 0.00567 | 1.0000 |
| O  | O118 | 1.0 | 0.98513 | 0.18223 | 0.49449 | 1.0000 |
| O  | O119 | 1.0 | 0.99490 | 0.51537 | 0.50208 | 1.0000 |
| O  | O120 | 1.0 | 0.17676 | 0.01010 | 0.24666 | 1.0000 |
| O  | O121 | 1.0 | 0.50713 | 0.98455 | 0.24023 | 1.0000 |
| O  | O122 | 1.0 | 0.82644 | 0.01669 | 0.75351 | 1.0000 |
| O  | O123 | 1.0 | 0.49374 | 0.02206 | 0.74748 | 1.0000 |
| O  | O124 | 1.0 | 0.85712 | 0.46173 | 0.68749 | 1.0000 |
| O  | O125 | 1.0 | 0.52913 | 0.83263 | 0.31700 | 1.0000 |
| O  | O126 | 1.0 | 0.15036 | 0.98346 | 0.14669 | 1.0000 |
| O  | O127 | 1.0 | 0.53076 | 0.84705 | 0.93076 | 1.0000 |
| O  | O128 | 1.0 | 0.15256 | 0.47132 | 0.31878 | 1.0000 |
| Al | Al1  | 1.0 | 0.46246 | 0.13547 | 0.62535 | 1.0000 |
| Al | Al2  | 1.0 | 0.86525 | 0.53551 | 0.62428 | 1.0000 |
| Al | Al3  | 1.0 | 0.47330 | 0.96885 | 0.30239 | 1.0000 |
| Al | Al4  | 1.0 | 0.15334 | 0.84108 | 0.12310 | 1.0000 |
| Al | Al5  | 1.0 | 0.45749 | 0.84803 | 0.86725 | 1.0000 |
| Al | Al6  | 1.0 | 0.15130 | 0.54350 | 0.38246 | 1.0000 |
| Si | Si1  | 1.0 | 0.34725 | 0.79350 | 0.04573 | 1.0000 |
| Si | Si2  | 1.0 | 0.33445 | 0.54156 | 0.05826 | 1.0000 |
| Si | Si3  | 1.0 | 0.71097 | 0.78139 | 0.05903 | 1.0000 |
| Si | Si4  | 1.0 | 0.71207 | 0.52434 | 0.05358 | 1.0000 |

|    |      |     |         |         |         |        |
|----|------|-----|---------|---------|---------|--------|
| Si | Si5  | 1.0 | 0.95375 | 0.78451 | 0.05820 | 1.0000 |
| Si | Si6  | 1.0 | 0.95141 | 0.52552 | 0.05959 | 1.0000 |
| Si | Si7  | 1.0 | 0.52006 | 0.85980 | 0.11744 | 1.0000 |
| Si | Si8  | 1.0 | 0.65123 | 0.20793 | 0.54899 | 1.0000 |
| Si | Si9  | 1.0 | 0.66085 | 0.46106 | 0.55943 | 1.0000 |
| Si | Si10 | 1.0 | 0.27345 | 0.20224 | 0.56030 | 1.0000 |
| Si | Si11 | 1.0 | 0.29051 | 0.46004 | 0.55544 | 1.0000 |
| Si | Si12 | 1.0 | 0.03077 | 0.21380 | 0.55003 | 1.0000 |
| Si | Si13 | 1.0 | 0.04748 | 0.47189 | 0.55447 | 1.0000 |
| Si | Si14 | 1.0 | 0.46260 | 0.33393 | 0.31026 | 1.0000 |
| Si | Si15 | 1.0 | 0.22160 | 0.72969 | 0.31116 | 1.0000 |
| Si | Si16 | 1.0 | 0.21291 | 0.97186 | 0.30390 | 1.0000 |
| Si | Si17 | 1.0 | 0.79843 | 0.64608 | 0.80120 | 1.0000 |
| Si | Si18 | 1.0 | 0.54906 | 0.65012 | 0.80734 | 1.0000 |
| Si | Si19 | 1.0 | 0.78038 | 0.28459 | 0.81282 | 1.0000 |
| Si | Si20 | 1.0 | 0.53437 | 0.28864 | 0.80627 | 1.0000 |
| Si | Si21 | 1.0 | 0.77869 | 0.03419 | 0.80983 | 1.0000 |
| Si | Si22 | 1.0 | 0.53043 | 0.03822 | 0.80587 | 1.0000 |
| Si | Si23 | 1.0 | 0.86177 | 0.47159 | 0.87324 | 1.0000 |
| Si | Si24 | 1.0 | 0.65855 | 0.53284 | 0.94015 | 1.0000 |
| Si | Si25 | 1.0 | 0.27267 | 0.77606 | 0.93666 | 1.0000 |
| Si | Si26 | 1.0 | 0.27771 | 0.51958 | 0.94895 | 1.0000 |
| Si | Si27 | 1.0 | 0.03120 | 0.77831 | 0.94769 | 1.0000 |
| Si | Si28 | 1.0 | 0.03825 | 0.51950 | 0.95124 | 1.0000 |
| Si | Si29 | 1.0 | 0.34759 | 0.19160 | 0.44917 | 1.0000 |
| Si | Si30 | 1.0 | 0.34422 | 0.44451 | 0.44480 | 1.0000 |
| Si | Si31 | 1.0 | 0.71550 | 0.22800 | 0.43805 | 1.0000 |
| Si | Si32 | 1.0 | 0.71459 | 0.48458 | 0.44831 | 1.0000 |
| Si | Si33 | 1.0 | 0.95533 | 0.22833 | 0.43900 | 1.0000 |
| Si | Si34 | 1.0 | 0.95663 | 0.48667 | 0.44531 | 1.0000 |
| Si | Si35 | 1.0 | 0.52342 | 0.13907 | 0.37823 | 1.0000 |
| Si | Si36 | 1.0 | 0.54209 | 0.33784 | 0.69278 | 1.0000 |
| Si | Si37 | 1.0 | 0.79027 | 0.72280 | 0.69016 | 1.0000 |
| Si | Si38 | 1.0 | 0.53402 | 0.71373 | 0.69752 | 1.0000 |

|    |      |     |         |         |         |        |
|----|------|-----|---------|---------|---------|--------|
| Si | Si39 | 1.0 | 0.78943 | 0.96735 | 0.69929 | 1.0000 |
| Si | Si40 | 1.0 | 0.53233 | 0.95815 | 0.69723 | 1.0000 |
| Si | Si41 | 1.0 | 0.21101 | 0.65923 | 0.20211 | 1.0000 |
| Si | Si42 | 1.0 | 0.46016 | 0.66731 | 0.18954 | 1.0000 |
| Si | Si43 | 1.0 | 0.21905 | 0.29468 | 0.19056 | 1.0000 |
| Si | Si44 | 1.0 | 0.47478 | 0.28286 | 0.19783 | 1.0000 |
| Si | Si45 | 1.0 | 0.47047 | 0.03889 | 0.18852 | 1.0000 |
| Si | Si46 | 1.0 | 0.14068 | 0.48620 | 0.12773 | 1.0000 |
| Si | Si47 | 1.0 | 0.52571 | 0.47129 | 0.12588 | 1.0000 |
| Si | Si48 | 1.0 | 0.84340 | 0.15507 | 0.62410 | 1.0000 |
| Si | Si49 | 1.0 | 0.46963 | 0.53308 | 0.62798 | 1.0000 |
| Si | Si50 | 1.0 | 0.15089 | 0.16025 | 0.37504 | 1.0000 |
| Si | Si51 | 1.0 | 0.53150 | 0.52388 | 0.37590 | 1.0000 |
| Si | Si52 | 1.0 | 0.84154 | 0.84344 | 0.87376 | 1.0000 |
| Si | Si53 | 1.0 | 0.46257 | 0.46429 | 0.87619 | 1.0000 |
| Si | Si54 | 1.0 | 0.79585 | 0.34376 | 0.70082 | 1.0000 |
| Si | Si55 | 1.0 | 0.47347 | 0.71393 | 0.30107 | 1.0000 |
| Si | Si56 | 1.0 | 0.21609 | 0.05234 | 0.19274 | 1.0000 |
| Si | Si57 | 1.0 | 0.64678 | 0.78792 | 0.94717 | 1.0000 |
| Si | Si58 | 1.0 | 0.21396 | 0.35710 | 0.30183 | 1.0000 |

T2T7T7T7T9T9

data\_image0

\_chemical\_formula\_structural H6O128Al6Si58  
\_chemical\_formula\_sum "H6 O128 Al6 Si58"  
\_cell\_length\_a 12.5819  
\_cell\_length\_b 12.515  
\_cell\_length\_c 26.5294  
\_cell\_angle\_alpha 89.7471  
\_cell\_angle\_beta 90.1765  
\_cell\_angle\_gamma 90.1434

\_space\_group\_name\_H-M\_alt "P 1"  
\_space\_group\_IT\_number 1

loop\_

\_space\_group\_symop\_operation\_xyz  
'x, y, z'

loop\_

\_atom\_site\_type\_symbol  
\_atom\_site\_label  
\_atom\_site\_symmetry\_multiplicity  
\_atom\_site\_fract\_x  
\_atom\_site\_fract\_y  
\_atom\_site\_fract\_z  
\_atom\_site\_occupancy  
H H1 1.0 0.48315 0.13797 0.53423 1.0000  
H H2 1.0 0.85713 0.51605 0.71482 1.0000  
H H3 1.0 0.58137 0.83452 0.34421 1.0000  
H H4 1.0 0.08740 0.01975 0.13351 1.0000  
H H5 1.0 0.47704 0.85123 0.95828 1.0000  
H H6 1.0 0.15036 0.52706 0.29158 1.0000  
O O1 1.0 0.37228 0.66563 0.05362 1.0000  
O O2 1.0 0.34246 0.82407 0.98525 1.0000

;

|   |     |     |         |         |         |        |
|---|-----|-----|---------|---------|---------|--------|
| O | O3  | 1.0 | 0.24246 | 0.82877 | 0.07482 | 1.0000 |
| O | O4  | 1.0 | 0.45240 | 0.85787 | 0.06521 | 1.0000 |
| O | O5  | 1.0 | 0.33002 | 0.48589 | 0.00323 | 1.0000 |
| O | O6  | 1.0 | 0.21746 | 0.53750 | 0.08469 | 1.0000 |
| O | O7  | 1.0 | 0.41728 | 0.47371 | 0.09259 | 1.0000 |
| O | O8  | 1.0 | 0.70388 | 0.65259 | 0.05928 | 1.0000 |
| O | O9  | 1.0 | 0.83129 | 0.82296 | 0.06615 | 1.0000 |
| O | O10 | 1.0 | 0.64185 | 0.82679 | 0.10561 | 1.0000 |
| O | O11 | 1.0 | 0.83046 | 0.48468 | 0.06853 | 1.0000 |
| O | O12 | 1.0 | 0.63009 | 0.46706 | 0.09137 | 1.0000 |
| O | O13 | 1.0 | 0.95945 | 0.65447 | 0.06120 | 1.0000 |
| O | O14 | 1.0 | 0.02453 | 0.83760 | 0.10172 | 1.0000 |
| O | O15 | 1.0 | 0.02146 | 0.47543 | 0.10551 | 1.0000 |
| O | O16 | 1.0 | 0.62878 | 0.33383 | 0.55353 | 1.0000 |
| O | O17 | 1.0 | 0.67804 | 0.17406 | 0.49152 | 1.0000 |
| O | O18 | 1.0 | 0.73793 | 0.16134 | 0.58787 | 1.0000 |
| O | O19 | 1.0 | 0.53523 | 0.14399 | 0.56220 | 1.0000 |
| O | O20 | 1.0 | 0.66877 | 0.51501 | 0.50332 | 1.0000 |
| O | O21 | 1.0 | 0.77074 | 0.46830 | 0.58956 | 1.0000 |
| O | O22 | 1.0 | 0.56386 | 0.52167 | 0.58682 | 1.0000 |
| O | O23 | 1.0 | 0.28368 | 0.33136 | 0.56187 | 1.0000 |
| O | O24 | 1.0 | 0.14972 | 0.16482 | 0.55621 | 1.0000 |
| O | O25 | 1.0 | 0.33183 | 0.15065 | 0.60768 | 1.0000 |
| O | O26 | 1.0 | 0.17181 | 0.50781 | 0.55367 | 1.0000 |
| O | O27 | 1.0 | 0.35502 | 0.51597 | 0.60108 | 1.0000 |
| O | O28 | 1.0 | 0.03542 | 0.34166 | 0.55599 | 1.0000 |
| O | O29 | 1.0 | 0.95166 | 0.15977 | 0.59146 | 1.0000 |
| O | O30 | 1.0 | 0.99203 | 0.52119 | 0.60296 | 1.0000 |
| O | O31 | 1.0 | 0.34063 | 0.37966 | 0.30542 | 1.0000 |
| O | O32 | 1.0 | 0.17469 | 0.34035 | 0.24404 | 1.0000 |
| O | O33 | 1.0 | 0.17578 | 0.26158 | 0.33745 | 1.0000 |
| O | O34 | 1.0 | 0.51101 | 0.31547 | 0.25447 | 1.0000 |
| O | O35 | 1.0 | 0.45900 | 0.22162 | 0.34050 | 1.0000 |
| O | O36 | 1.0 | 0.53647 | 0.42236 | 0.33780 | 1.0000 |

|   |     |     |         |         |         |        |
|---|-----|-----|---------|---------|---------|--------|
| O | O37 | 1.0 | 0.34962 | 0.74196 | 0.30085 | 1.0000 |
| O | O38 | 1.0 | 0.17050 | 0.84882 | 0.31047 | 1.0000 |
| O | O39 | 1.0 | 0.19898 | 0.66564 | 0.36183 | 1.0000 |
| O | O40 | 1.0 | 0.51406 | 0.63279 | 0.34303 | 1.0000 |
| O | O41 | 1.0 | 0.33874 | 0.97989 | 0.31095 | 1.0000 |
| O | O42 | 1.0 | 0.15205 | 0.04981 | 0.34326 | 1.0000 |
| O | O43 | 1.0 | 0.54492 | 0.02901 | 0.34962 | 1.0000 |
| O | O44 | 1.0 | 0.67457 | 0.61366 | 0.80905 | 1.0000 |
| O | O45 | 1.0 | 0.82836 | 0.65300 | 0.74121 | 1.0000 |
| O | O46 | 1.0 | 0.82684 | 0.75867 | 0.82814 | 1.0000 |
| O | O47 | 1.0 | 0.87221 | 0.54987 | 0.82399 | 1.0000 |
| O | O48 | 1.0 | 0.50842 | 0.64825 | 0.74922 | 1.0000 |
| O | O49 | 1.0 | 0.53806 | 0.76464 | 0.83338 | 1.0000 |
| O | O50 | 1.0 | 0.47740 | 0.56222 | 0.83713 | 1.0000 |
| O | O51 | 1.0 | 0.65823 | 0.32557 | 0.81337 | 1.0000 |
| O | O52 | 1.0 | 0.79290 | 0.15892 | 0.82512 | 1.0000 |
| O | O53 | 1.0 | 0.84391 | 0.34905 | 0.85619 | 1.0000 |
| O | O54 | 1.0 | 0.52357 | 0.16408 | 0.81916 | 1.0000 |
| O | O55 | 1.0 | 0.46216 | 0.35173 | 0.84680 | 1.0000 |
| O | O56 | 1.0 | 0.65480 | 0.99901 | 0.81208 | 1.0000 |
| O | O57 | 1.0 | 0.84553 | 0.96345 | 0.85080 | 1.0000 |
| O | O58 | 1.0 | 0.45703 | 0.97595 | 0.84525 | 1.0000 |
| O | O59 | 1.0 | 0.63003 | 0.66043 | 0.94174 | 1.0000 |
| O | O60 | 1.0 | 0.66320 | 0.82393 | 0.00519 | 1.0000 |
| O | O61 | 1.0 | 0.73990 | 0.83321 | 0.91199 | 1.0000 |
| O | O62 | 1.0 | 0.68180 | 0.48938 | 0.99668 | 1.0000 |
| O | O63 | 1.0 | 0.76535 | 0.51739 | 0.90748 | 1.0000 |
| O | O64 | 1.0 | 0.55827 | 0.46727 | 0.91810 | 1.0000 |
| O | O65 | 1.0 | 0.27015 | 0.64807 | 0.94622 | 1.0000 |
| O | O66 | 1.0 | 0.15130 | 0.82154 | 0.93756 | 1.0000 |
| O | O67 | 1.0 | 0.33329 | 0.80660 | 0.88617 | 1.0000 |
| O | O68 | 1.0 | 0.15766 | 0.47288 | 0.94530 | 1.0000 |
| O | O69 | 1.0 | 0.34848 | 0.47173 | 0.90409 | 1.0000 |
| O | O70 | 1.0 | 0.03116 | 0.64862 | 0.94772 | 1.0000 |



|   |      |     |         |         |         |        |
|---|------|-----|---------|---------|---------|--------|
| O | O71  | 1.0 | 0.95123 | 0.82115 | 0.90405 | 1.0000 |
| O | O72  | 1.0 | 0.97022 | 0.46937 | 0.90557 | 1.0000 |
| O | O73  | 1.0 | 0.37517 | 0.31760 | 0.44187 | 1.0000 |
| O | O74  | 1.0 | 0.33862 | 0.16143 | 0.50895 | 1.0000 |
| O | O75  | 1.0 | 0.23857 | 0.15888 | 0.42001 | 1.0000 |
| O | O76  | 1.0 | 0.44836 | 0.12304 | 0.42820 | 1.0000 |
| O | O77  | 1.0 | 0.35161 | 0.48583 | 0.50256 | 1.0000 |
| O | O78  | 1.0 | 0.23041 | 0.46208 | 0.41876 | 1.0000 |
| O | O79  | 1.0 | 0.43445 | 0.51224 | 0.41452 | 1.0000 |
| O | O80  | 1.0 | 0.70844 | 0.35599 | 0.44219 | 1.0000 |
| O | O81  | 1.0 | 0.83506 | 0.19013 | 0.42461 | 1.0000 |
| O | O82  | 1.0 | 0.63709 | 0.19035 | 0.39342 | 1.0000 |
| O | O83  | 1.0 | 0.83396 | 0.52639 | 0.43982 | 1.0000 |
| O | O84  | 1.0 | 0.64325 | 0.54085 | 0.40438 | 1.0000 |
| O | O85  | 1.0 | 0.96426 | 0.35701 | 0.43701 | 1.0000 |
| O | O86  | 1.0 | 0.03293 | 0.17500 | 0.39730 | 1.0000 |
| O | O87  | 1.0 | 0.02299 | 0.54727 | 0.40242 | 1.0000 |
| O | O88  | 1.0 | 0.67035 | 0.36417 | 0.69633 | 1.0000 |
| O | O89  | 1.0 | 0.83176 | 0.31333 | 0.75770 | 1.0000 |
| O | O90  | 1.0 | 0.84184 | 0.25882 | 0.66126 | 1.0000 |
| O | O91  | 1.0 | 0.49668 | 0.31626 | 0.74931 | 1.0000 |
| O | O92  | 1.0 | 0.52551 | 0.23711 | 0.65690 | 1.0000 |
| O | O93  | 1.0 | 0.48356 | 0.44495 | 0.67252 | 1.0000 |
| O | O94  | 1.0 | 0.66161 | 0.71760 | 0.68865 | 1.0000 |
| O | O95  | 1.0 | 0.83328 | 0.84548 | 0.69464 | 1.0000 |
| O | O96  | 1.0 | 0.83951 | 0.66435 | 0.64253 | 1.0000 |
| O | O97  | 1.0 | 0.49165 | 0.83484 | 0.70221 | 1.0000 |
| O | O98  | 1.0 | 0.47414 | 0.65270 | 0.65153 | 1.0000 |
| O | O99  | 1.0 | 0.66194 | 0.96531 | 0.69491 | 1.0000 |
| O | O100 | 1.0 | 0.84019 | 0.04380 | 0.65543 | 1.0000 |
| O | O101 | 1.0 | 0.48463 | 0.00932 | 0.64702 | 1.0000 |
| O | O102 | 1.0 | 0.33738 | 0.62803 | 0.19626 | 1.0000 |
| O | O103 | 1.0 | 0.17850 | 0.65645 | 0.26266 | 1.0000 |
| O | O104 | 1.0 | 0.18662 | 0.77348 | 0.17764 | 1.0000 |

|    |      |     |         |         |         |        |
|----|------|-----|---------|---------|---------|--------|
| O  | O105 | 1.0 | 0.14167 | 0.56210 | 0.17751 | 1.0000 |
| O  | O106 | 1.0 | 0.51371 | 0.68430 | 0.24529 | 1.0000 |
| O  | O107 | 1.0 | 0.46536 | 0.77872 | 0.15835 | 1.0000 |
| O  | O108 | 1.0 | 0.52947 | 0.57592 | 0.16214 | 1.0000 |
| O  | O109 | 1.0 | 0.34661 | 0.29285 | 0.19326 | 1.0000 |
| O  | O110 | 1.0 | 0.17491 | 0.17315 | 0.18215 | 1.0000 |
| O  | O111 | 1.0 | 0.17853 | 0.36652 | 0.14388 | 1.0000 |
| O  | O112 | 1.0 | 0.50979 | 0.16237 | 0.18489 | 1.0000 |
| O  | O113 | 1.0 | 0.53085 | 0.36278 | 0.15864 | 1.0000 |
| O  | O114 | 1.0 | 0.33969 | 0.03398 | 0.18193 | 1.0000 |
| O  | O115 | 1.0 | 0.52055 | 0.97953 | 0.13993 | 1.0000 |
| O  | O116 | 1.0 | 0.99077 | 0.82211 | 0.00194 | 1.0000 |
| O  | O117 | 1.0 | 0.99222 | 0.48080 | 0.00567 | 1.0000 |
| O  | O118 | 1.0 | 0.98513 | 0.18223 | 0.49449 | 1.0000 |
| O  | O119 | 1.0 | 0.99490 | 0.51537 | 0.50208 | 1.0000 |
| O  | O120 | 1.0 | 0.17676 | 0.01010 | 0.24666 | 1.0000 |
| O  | O121 | 1.0 | 0.50713 | 0.98455 | 0.24023 | 1.0000 |
| O  | O122 | 1.0 | 0.82644 | 0.01669 | 0.75351 | 1.0000 |
| O  | O123 | 1.0 | 0.49374 | 0.02206 | 0.74748 | 1.0000 |
| O  | O124 | 1.0 | 0.85712 | 0.46173 | 0.68749 | 1.0000 |
| O  | O125 | 1.0 | 0.52913 | 0.83263 | 0.31700 | 1.0000 |
| O  | O126 | 1.0 | 0.15036 | 0.98346 | 0.14669 | 1.0000 |
| O  | O127 | 1.0 | 0.53076 | 0.84705 | 0.93076 | 1.0000 |
| O  | O128 | 1.0 | 0.15256 | 0.47132 | 0.31878 | 1.0000 |
| Al | Al1  | 1.0 | 0.46246 | 0.13547 | 0.62535 | 1.0000 |
| Al | Al2  | 1.0 | 0.86525 | 0.53551 | 0.62428 | 1.0000 |
| Al | Al3  | 1.0 | 0.47330 | 0.96885 | 0.30239 | 1.0000 |
| Al | Al4  | 1.0 | 0.15334 | 0.84108 | 0.12310 | 1.0000 |
| Al | Al5  | 1.0 | 0.45749 | 0.84803 | 0.86725 | 1.0000 |
| Al | Al6  | 1.0 | 0.15130 | 0.54350 | 0.38246 | 1.0000 |
| Si | Si1  | 1.0 | 0.34725 | 0.79350 | 0.04573 | 1.0000 |
| Si | Si2  | 1.0 | 0.33445 | 0.54156 | 0.05826 | 1.0000 |
| Si | Si3  | 1.0 | 0.71097 | 0.78139 | 0.05903 | 1.0000 |
| Si | Si4  | 1.0 | 0.71207 | 0.52434 | 0.05358 | 1.0000 |

|    |      |     |         |         |         |        |
|----|------|-----|---------|---------|---------|--------|
| Si | Si5  | 1.0 | 0.95375 | 0.78451 | 0.05820 | 1.0000 |
| Si | Si6  | 1.0 | 0.95141 | 0.52552 | 0.05959 | 1.0000 |
| Si | Si7  | 1.0 | 0.52006 | 0.85980 | 0.11744 | 1.0000 |
| Si | Si8  | 1.0 | 0.65123 | 0.20793 | 0.54899 | 1.0000 |
| Si | Si9  | 1.0 | 0.66085 | 0.46106 | 0.55943 | 1.0000 |
| Si | Si10 | 1.0 | 0.27345 | 0.20224 | 0.56030 | 1.0000 |
| Si | Si11 | 1.0 | 0.29051 | 0.46004 | 0.55544 | 1.0000 |
| Si | Si12 | 1.0 | 0.03077 | 0.21380 | 0.55003 | 1.0000 |
| Si | Si13 | 1.0 | 0.04748 | 0.47189 | 0.55447 | 1.0000 |
| Si | Si14 | 1.0 | 0.46260 | 0.33393 | 0.31026 | 1.0000 |
| Si | Si15 | 1.0 | 0.22160 | 0.72969 | 0.31116 | 1.0000 |
| Si | Si16 | 1.0 | 0.21291 | 0.97186 | 0.30390 | 1.0000 |
| Si | Si17 | 1.0 | 0.79843 | 0.64608 | 0.80120 | 1.0000 |
| Si | Si18 | 1.0 | 0.54906 | 0.65012 | 0.80734 | 1.0000 |
| Si | Si19 | 1.0 | 0.78038 | 0.28459 | 0.81282 | 1.0000 |
| Si | Si20 | 1.0 | 0.53437 | 0.28864 | 0.80627 | 1.0000 |
| Si | Si21 | 1.0 | 0.77869 | 0.03419 | 0.80983 | 1.0000 |
| Si | Si22 | 1.0 | 0.53043 | 0.03822 | 0.80587 | 1.0000 |
| Si | Si23 | 1.0 | 0.86177 | 0.47159 | 0.87324 | 1.0000 |
| Si | Si24 | 1.0 | 0.65855 | 0.53284 | 0.94015 | 1.0000 |
| Si | Si25 | 1.0 | 0.27267 | 0.77606 | 0.93666 | 1.0000 |
| Si | Si26 | 1.0 | 0.27771 | 0.51958 | 0.94895 | 1.0000 |
| Si | Si27 | 1.0 | 0.03120 | 0.77831 | 0.94769 | 1.0000 |
| Si | Si28 | 1.0 | 0.03825 | 0.51950 | 0.95124 | 1.0000 |
| Si | Si29 | 1.0 | 0.34759 | 0.19160 | 0.44917 | 1.0000 |
| Si | Si30 | 1.0 | 0.34422 | 0.44451 | 0.44480 | 1.0000 |
| Si | Si31 | 1.0 | 0.71550 | 0.22800 | 0.43805 | 1.0000 |
| Si | Si32 | 1.0 | 0.71459 | 0.48458 | 0.44831 | 1.0000 |
| Si | Si33 | 1.0 | 0.95533 | 0.22833 | 0.43900 | 1.0000 |
| Si | Si34 | 1.0 | 0.95663 | 0.48667 | 0.44531 | 1.0000 |
| Si | Si35 | 1.0 | 0.52342 | 0.13907 | 0.37823 | 1.0000 |
| Si | Si36 | 1.0 | 0.54209 | 0.33784 | 0.69278 | 1.0000 |
| Si | Si37 | 1.0 | 0.79027 | 0.72280 | 0.69016 | 1.0000 |
| Si | Si38 | 1.0 | 0.53402 | 0.71373 | 0.69752 | 1.0000 |

|    |      |     |         |         |         |        |
|----|------|-----|---------|---------|---------|--------|
| Si | Si39 | 1.0 | 0.78943 | 0.96735 | 0.69929 | 1.0000 |
| Si | Si40 | 1.0 | 0.53233 | 0.95815 | 0.69723 | 1.0000 |
| Si | Si41 | 1.0 | 0.21101 | 0.65923 | 0.20211 | 1.0000 |
| Si | Si42 | 1.0 | 0.46016 | 0.66731 | 0.18954 | 1.0000 |
| Si | Si43 | 1.0 | 0.21905 | 0.29468 | 0.19056 | 1.0000 |
| Si | Si44 | 1.0 | 0.47478 | 0.28286 | 0.19783 | 1.0000 |
| Si | Si45 | 1.0 | 0.47047 | 0.03889 | 0.18852 | 1.0000 |
| Si | Si46 | 1.0 | 0.14068 | 0.48620 | 0.12773 | 1.0000 |
| Si | Si47 | 1.0 | 0.52571 | 0.47129 | 0.12588 | 1.0000 |
| Si | Si48 | 1.0 | 0.84340 | 0.15507 | 0.62410 | 1.0000 |
| Si | Si49 | 1.0 | 0.46963 | 0.53308 | 0.62798 | 1.0000 |
| Si | Si50 | 1.0 | 0.15089 | 0.16025 | 0.37504 | 1.0000 |
| Si | Si51 | 1.0 | 0.53150 | 0.52388 | 0.37590 | 1.0000 |
| Si | Si52 | 1.0 | 0.84154 | 0.84344 | 0.87376 | 1.0000 |
| Si | Si53 | 1.0 | 0.46257 | 0.46429 | 0.87619 | 1.0000 |
| Si | Si54 | 1.0 | 0.79585 | 0.34376 | 0.70082 | 1.0000 |
| Si | Si55 | 1.0 | 0.47347 | 0.71393 | 0.30107 | 1.0000 |
| Si | Si56 | 1.0 | 0.21609 | 0.05234 | 0.19274 | 1.0000 |
| Si | Si57 | 1.0 | 0.64678 | 0.78792 | 0.94717 | 1.0000 |
| Si | Si58 | 1.0 | 0.21396 | 0.35710 | 0.30183 | 1.0000 |

T7T7T7T7T9T9

data\_image0

\_chemical\_formula\_structural H6O128Al6Si58  
\_chemical\_formula\_sum "H6 O128 Al6 Si58"  
\_cell\_length\_a 12.5938  
\_cell\_length\_b 12.5372  
\_cell\_length\_c 26.4935  
\_cell\_angle\_alpha 89.9775  
\_cell\_angle\_beta 89.9595  
\_cell\_angle\_gamma 90.8959

\_space\_group\_name\_H-M\_alt "P 1"  
\_space\_group\_IT\_number 1

loop\_

\_space\_group\_symop\_operation\_xyz  
'x, y, z'

loop\_

\_atom\_site\_type\_symbol  
\_atom\_site\_label  
\_atom\_site\_symmetry\_multiplicity  
\_atom\_site\_fract\_x  
\_atom\_site\_fract\_y  
\_atom\_site\_fract\_z  
\_atom\_site\_occupancy  
H H1 1.0 0.47451 0.14075 0.53587 1.0000  
H H2 1.0 0.85642 0.52707 0.71294 1.0000  
H H3 1.0 0.52584 0.85951 0.03582 1.0000  
H H4 1.0 0.14266 0.47332 0.21313 1.0000  
H H5 1.0 0.90673 0.02384 0.86781 1.0000  
H H6 1.0 0.09068 0.97721 0.36606 1.0000  
O O1 1.0 0.37889 0.66887 0.05093 1.0000  
O O2 1.0 0.33573 0.83156 0.98989 1.0000

;

|   |     |     |         |         |         |        |
|---|-----|-----|---------|---------|---------|--------|
| O | O3  | 1.0 | 0.26331 | 0.83431 | 0.08517 | 1.0000 |
| O | O4  | 1.0 | 0.31842 | 0.48822 | 0.00484 | 1.0000 |
| O | O5  | 1.0 | 0.23978 | 0.53922 | 0.09453 | 1.0000 |
| O | O6  | 1.0 | 0.44287 | 0.48098 | 0.08297 | 1.0000 |
| O | O7  | 1.0 | 0.72264 | 0.65569 | 0.05622 | 1.0000 |
| O | O8  | 1.0 | 0.85025 | 0.82665 | 0.05721 | 1.0000 |
| O | O9  | 1.0 | 0.66865 | 0.82625 | 0.10942 | 1.0000 |
| O | O10 | 1.0 | 0.83544 | 0.48155 | 0.05477 | 1.0000 |
| O | O11 | 1.0 | 0.64981 | 0.47763 | 0.09984 | 1.0000 |
| O | O12 | 1.0 | 0.96768 | 0.65324 | 0.05378 | 1.0000 |
| O | O13 | 1.0 | 0.04976 | 0.83022 | 0.09366 | 1.0000 |
| O | O14 | 1.0 | 0.02042 | 0.47077 | 0.09725 | 1.0000 |
| O | O15 | 1.0 | 0.62188 | 0.33131 | 0.55141 | 1.0000 |
| O | O16 | 1.0 | 0.66502 | 0.16906 | 0.49014 | 1.0000 |
| O | O17 | 1.0 | 0.73650 | 0.16516 | 0.58556 | 1.0000 |
| O | O18 | 1.0 | 0.53006 | 0.14023 | 0.56296 | 1.0000 |
| O | O19 | 1.0 | 0.67970 | 0.51186 | 0.50440 | 1.0000 |
| O | O20 | 1.0 | 0.76149 | 0.46223 | 0.59366 | 1.0000 |
| O | O21 | 1.0 | 0.55774 | 0.51918 | 0.58336 | 1.0000 |
| O | O22 | 1.0 | 0.27879 | 0.34310 | 0.55786 | 1.0000 |
| O | O23 | 1.0 | 0.14999 | 0.17282 | 0.55725 | 1.0000 |
| O | O24 | 1.0 | 0.33122 | 0.17017 | 0.60956 | 1.0000 |
| O | O25 | 1.0 | 0.16565 | 0.51699 | 0.55427 | 1.0000 |
| O | O26 | 1.0 | 0.35056 | 0.52287 | 0.59985 | 1.0000 |
| O | O27 | 1.0 | 0.03246 | 0.34606 | 0.55350 | 1.0000 |
| O | O28 | 1.0 | 0.95014 | 0.16900 | 0.59344 | 1.0000 |
| O | O29 | 1.0 | 0.98133 | 0.52817 | 0.59770 | 1.0000 |
| O | O30 | 1.0 | 0.33541 | 0.37926 | 0.30516 | 1.0000 |
| O | O31 | 1.0 | 0.17528 | 0.34555 | 0.23853 | 1.0000 |
| O | O32 | 1.0 | 0.18821 | 0.22684 | 0.32121 | 1.0000 |
| O | O33 | 1.0 | 0.14062 | 0.43659 | 0.32552 | 1.0000 |
| O | O34 | 1.0 | 0.50633 | 0.33835 | 0.25018 | 1.0000 |
| O | O35 | 1.0 | 0.46434 | 0.22378 | 0.33361 | 1.0000 |
| O | O36 | 1.0 | 0.53018 | 0.42509 | 0.33919 | 1.0000 |

|   |     |     |         |         |         |        |
|---|-----|-----|---------|---------|---------|--------|
| O | O37 | 1.0 | 0.34594 | 0.70277 | 0.30779 | 1.0000 |
| O | O38 | 1.0 | 0.18034 | 0.82806 | 0.32192 | 1.0000 |
| O | O39 | 1.0 | 0.17933 | 0.63401 | 0.35813 | 1.0000 |
| O | O40 | 1.0 | 0.50655 | 0.83628 | 0.31860 | 1.0000 |
| O | O41 | 1.0 | 0.53254 | 0.63774 | 0.34183 | 1.0000 |
| O | O42 | 1.0 | 0.34233 | 0.97162 | 0.31737 | 1.0000 |
| O | O43 | 1.0 | 0.52953 | 0.02873 | 0.35233 | 1.0000 |
| O | O44 | 1.0 | 0.66630 | 0.62112 | 0.80593 | 1.0000 |
| O | O45 | 1.0 | 0.82494 | 0.65427 | 0.73833 | 1.0000 |
| O | O46 | 1.0 | 0.81386 | 0.77405 | 0.82064 | 1.0000 |
| O | O47 | 1.0 | 0.86139 | 0.56430 | 0.82536 | 1.0000 |
| O | O48 | 1.0 | 0.49625 | 0.65955 | 0.75017 | 1.0000 |
| O | O49 | 1.0 | 0.53594 | 0.77630 | 0.83313 | 1.0000 |
| O | O50 | 1.0 | 0.47123 | 0.57482 | 0.83964 | 1.0000 |
| O | O51 | 1.0 | 0.65365 | 0.29771 | 0.80798 | 1.0000 |
| O | O52 | 1.0 | 0.81923 | 0.17238 | 0.82215 | 1.0000 |
| O | O53 | 1.0 | 0.82068 | 0.36685 | 0.85777 | 1.0000 |
| O | O54 | 1.0 | 0.49320 | 0.16384 | 0.81893 | 1.0000 |
| O | O55 | 1.0 | 0.46675 | 0.36231 | 0.84197 | 1.0000 |
| O | O56 | 1.0 | 0.65756 | 0.02882 | 0.81687 | 1.0000 |
| O | O57 | 1.0 | 0.47099 | 0.97111 | 0.85245 | 1.0000 |
| O | O58 | 1.0 | 0.62494 | 0.66533 | 0.94407 | 1.0000 |
| O | O59 | 1.0 | 0.65561 | 0.82668 | 0.01060 | 1.0000 |
| O | O60 | 1.0 | 0.76234 | 0.82551 | 0.92403 | 1.0000 |
| O | O61 | 1.0 | 0.55258 | 0.85704 | 0.92678 | 1.0000 |
| O | O62 | 1.0 | 0.66066 | 0.49275 | 0.99971 | 1.0000 |
| O | O63 | 1.0 | 0.77907 | 0.53418 | 0.91753 | 1.0000 |
| O | O64 | 1.0 | 0.57782 | 0.47008 | 0.90995 | 1.0000 |
| O | O65 | 1.0 | 0.29254 | 0.65053 | 0.94322 | 1.0000 |
| O | O66 | 1.0 | 0.17153 | 0.82135 | 0.92838 | 1.0000 |
| O | O67 | 1.0 | 0.36221 | 0.81207 | 0.88956 | 1.0000 |
| O | O68 | 1.0 | 0.16625 | 0.48189 | 0.93421 | 1.0000 |
| O | O69 | 1.0 | 0.36504 | 0.46582 | 0.90903 | 1.0000 |
| O | O70 | 1.0 | 0.04120 | 0.65398 | 0.93778 | 1.0000 |

|   |      |     |         |         |         |        |
|---|------|-----|---------|---------|---------|--------|
| O | O71  | 1.0 | 0.97808 | 0.83679 | 0.89610 | 1.0000 |
| O | O72  | 1.0 | 0.97578 | 0.47349 | 0.89732 | 1.0000 |
| O | O73  | 1.0 | 0.37390 | 0.33290 | 0.44338 | 1.0000 |
| O | O74  | 1.0 | 0.34473 | 0.17305 | 0.51078 | 1.0000 |
| O | O75  | 1.0 | 0.23754 | 0.17115 | 0.42438 | 1.0000 |
| O | O76  | 1.0 | 0.44769 | 0.14164 | 0.42701 | 1.0000 |
| O | O77  | 1.0 | 0.34116 | 0.50455 | 0.49992 | 1.0000 |
| O | O78  | 1.0 | 0.22165 | 0.46666 | 0.41789 | 1.0000 |
| O | O79  | 1.0 | 0.42353 | 0.52822 | 0.40999 | 1.0000 |
| O | O80  | 1.0 | 0.70748 | 0.34986 | 0.44291 | 1.0000 |
| O | O81  | 1.0 | 0.82880 | 0.17895 | 0.42841 | 1.0000 |
| O | O82  | 1.0 | 0.63811 | 0.18741 | 0.38984 | 1.0000 |
| O | O83  | 1.0 | 0.83427 | 0.51860 | 0.43477 | 1.0000 |
| O | O84  | 1.0 | 0.63647 | 0.53462 | 0.40817 | 1.0000 |
| O | O85  | 1.0 | 0.95867 | 0.34629 | 0.43843 | 1.0000 |
| O | O86  | 1.0 | 0.02203 | 0.16451 | 0.39575 | 1.0000 |
| O | O87  | 1.0 | 0.02471 | 0.52608 | 0.39751 | 1.0000 |
| O | O88  | 1.0 | 0.66804 | 0.37837 | 0.69874 | 1.0000 |
| O | O89  | 1.0 | 0.83223 | 0.33236 | 0.75780 | 1.0000 |
| O | O90  | 1.0 | 0.83225 | 0.26379 | 0.66244 | 1.0000 |
| O | O91  | 1.0 | 0.49139 | 0.31275 | 0.74606 | 1.0000 |
| O | O92  | 1.0 | 0.53713 | 0.24146 | 0.65443 | 1.0000 |
| O | O93  | 1.0 | 0.47844 | 0.44411 | 0.67014 | 1.0000 |
| O | O94  | 1.0 | 0.65641 | 0.72246 | 0.69143 | 1.0000 |
| O | O95  | 1.0 | 0.82771 | 0.84994 | 0.69204 | 1.0000 |
| O | O96  | 1.0 | 0.82830 | 0.66880 | 0.63937 | 1.0000 |
| O | O97  | 1.0 | 0.48447 | 0.83656 | 0.69651 | 1.0000 |
| O | O98  | 1.0 | 0.47538 | 0.65091 | 0.65065 | 1.0000 |
| O | O99  | 1.0 | 0.65579 | 0.96930 | 0.69428 | 1.0000 |
| O | O100 | 1.0 | 0.83390 | 0.05058 | 0.65503 | 1.0000 |
| O | O101 | 1.0 | 0.47211 | 0.02131 | 0.65299 | 1.0000 |
| O | O102 | 1.0 | 0.33159 | 0.62094 | 0.19912 | 1.0000 |
| O | O103 | 1.0 | 0.16727 | 0.66742 | 0.25800 | 1.0000 |
| O | O104 | 1.0 | 0.16830 | 0.73669 | 0.16271 | 1.0000 |



|    |      |     |         |         |         |        |
|----|------|-----|---------|---------|---------|--------|
| O  | O105 | 1.0 | 0.50836 | 0.68721 | 0.24587 | 1.0000 |
| O  | O106 | 1.0 | 0.46168 | 0.75784 | 0.15420 | 1.0000 |
| O  | O107 | 1.0 | 0.52116 | 0.55554 | 0.17006 | 1.0000 |
| O  | O108 | 1.0 | 0.34471 | 0.27745 | 0.19232 | 1.0000 |
| O  | O109 | 1.0 | 0.17356 | 0.15013 | 0.19187 | 1.0000 |
| O  | O110 | 1.0 | 0.17392 | 0.33164 | 0.13951 | 1.0000 |
| O  | O111 | 1.0 | 0.51662 | 0.16274 | 0.19543 | 1.0000 |
| O  | O112 | 1.0 | 0.52473 | 0.34901 | 0.15037 | 1.0000 |
| O  | O113 | 1.0 | 0.34537 | 0.03014 | 0.19264 | 1.0000 |
| O  | O114 | 1.0 | 0.16630 | 0.94996 | 0.15437 | 1.0000 |
| O  | O115 | 1.0 | 0.53050 | 0.97682 | 0.15328 | 1.0000 |
| O  | O116 | 1.0 | 0.01622 | 0.82260 | 0.99587 | 1.0000 |
| O  | O117 | 1.0 | 0.00431 | 0.48514 | 0.99688 | 1.0000 |
| O  | O118 | 1.0 | 0.98451 | 0.17665 | 0.49566 | 1.0000 |
| O  | O119 | 1.0 | 0.99618 | 0.51540 | 0.49720 | 1.0000 |
| O  | O120 | 1.0 | 0.18059 | 0.98206 | 0.25205 | 1.0000 |
| O  | O121 | 1.0 | 0.50537 | 0.99339 | 0.25323 | 1.0000 |
| O  | O122 | 1.0 | 0.82157 | 0.01727 | 0.75276 | 1.0000 |
| O  | O123 | 1.0 | 0.49360 | 0.00741 | 0.75326 | 1.0000 |
| O  | O124 | 1.0 | 0.85835 | 0.47065 | 0.68605 | 1.0000 |
| O  | O125 | 1.0 | 0.47023 | 0.85984 | 0.06291 | 1.0000 |
| O  | O126 | 1.0 | 0.14105 | 0.52956 | 0.18619 | 1.0000 |
| O  | O127 | 1.0 | 0.84901 | 0.98243 | 0.85234 | 1.0000 |
| O  | O128 | 1.0 | 0.14959 | 0.01819 | 0.35131 | 1.0000 |
| Al | Al1  | 1.0 | 0.46014 | 0.14365 | 0.62618 | 1.0000 |
| Al | Al2  | 1.0 | 0.85772 | 0.53997 | 0.62247 | 1.0000 |
| Al | Al3  | 1.0 | 0.54017 | 0.85469 | 0.12605 | 1.0000 |
| Al | Al4  | 1.0 | 0.14350 | 0.46020 | 0.12259 | 1.0000 |
| Al | Al5  | 1.0 | 0.84978 | 0.83979 | 0.87504 | 1.0000 |
| Al | Al6  | 1.0 | 0.15058 | 0.16001 | 0.37507 | 1.0000 |
| Si | Si1  | 1.0 | 0.34284 | 0.54342 | 0.05928 | 1.0000 |
| Si | Si2  | 1.0 | 0.72698 | 0.78453 | 0.05994 | 1.0000 |
| Si | Si3  | 1.0 | 0.71668 | 0.52703 | 0.05306 | 1.0000 |
| Si | Si4  | 1.0 | 0.97042 | 0.78191 | 0.05006 | 1.0000 |

|    |      |     |         |         |         |        |
|----|------|-----|---------|---------|---------|--------|
| Si | Si5  | 1.0 | 0.95818 | 0.52308 | 0.05151 | 1.0000 |
| Si | Si6  | 1.0 | 0.64496 | 0.20565 | 0.54786 | 1.0000 |
| Si | Si7  | 1.0 | 0.65744 | 0.45706 | 0.55918 | 1.0000 |
| Si | Si8  | 1.0 | 0.27345 | 0.21408 | 0.56039 | 1.0000 |
| Si | Si9  | 1.0 | 0.28441 | 0.47160 | 0.55333 | 1.0000 |
| Si | Si10 | 1.0 | 0.02981 | 0.21737 | 0.54991 | 1.0000 |
| Si | Si11 | 1.0 | 0.04267 | 0.47622 | 0.55156 | 1.0000 |
| Si | Si12 | 1.0 | 0.21034 | 0.34346 | 0.29876 | 1.0000 |
| Si | Si13 | 1.0 | 0.45875 | 0.34105 | 0.30706 | 1.0000 |
| Si | Si14 | 1.0 | 0.21891 | 0.70607 | 0.31149 | 1.0000 |
| Si | Si15 | 1.0 | 0.47393 | 0.71541 | 0.30306 | 1.0000 |
| Si | Si16 | 1.0 | 0.47143 | 0.95800 | 0.30936 | 1.0000 |
| Si | Si17 | 1.0 | 0.14288 | 0.51423 | 0.37495 | 1.0000 |
| Si | Si18 | 1.0 | 0.79113 | 0.65712 | 0.79871 | 1.0000 |
| Si | Si19 | 1.0 | 0.54267 | 0.65847 | 0.80723 | 1.0000 |
| Si | Si20 | 1.0 | 0.78071 | 0.29431 | 0.81146 | 1.0000 |
| Si | Si21 | 1.0 | 0.52569 | 0.28470 | 0.80325 | 1.0000 |
| Si | Si22 | 1.0 | 0.52837 | 0.04224 | 0.80934 | 1.0000 |
| Si | Si23 | 1.0 | 0.85792 | 0.48627 | 0.87465 | 1.0000 |
| Si | Si24 | 1.0 | 0.65295 | 0.79285 | 0.95029 | 1.0000 |
| Si | Si25 | 1.0 | 0.66104 | 0.54106 | 0.94289 | 1.0000 |
| Si | Si26 | 1.0 | 0.28979 | 0.77840 | 0.93754 | 1.0000 |
| Si | Si27 | 1.0 | 0.28551 | 0.52197 | 0.94802 | 1.0000 |
| Si | Si28 | 1.0 | 0.04912 | 0.78369 | 0.93915 | 1.0000 |
| Si | Si29 | 1.0 | 0.04676 | 0.52537 | 0.94244 | 1.0000 |
| Si | Si30 | 1.0 | 0.48124 | 0.85213 | 0.87555 | 1.0000 |
| Si | Si31 | 1.0 | 0.34678 | 0.20544 | 0.45030 | 1.0000 |
| Si | Si32 | 1.0 | 0.33974 | 0.45767 | 0.44288 | 1.0000 |
| Si | Si33 | 1.0 | 0.71054 | 0.22192 | 0.43762 | 1.0000 |
| Si | Si34 | 1.0 | 0.71460 | 0.47845 | 0.44779 | 1.0000 |
| Si | Si35 | 1.0 | 0.95115 | 0.21658 | 0.43916 | 1.0000 |
| Si | Si36 | 1.0 | 0.95366 | 0.47491 | 0.44286 | 1.0000 |
| Si | Si37 | 1.0 | 0.51913 | 0.14739 | 0.37576 | 1.0000 |
| Si | Si38 | 1.0 | 0.54265 | 0.34224 | 0.69117 | 1.0000 |

|    |      |     |         |         |         |        |
|----|------|-----|---------|---------|---------|--------|
| Si | Si39 | 1.0 | 0.78482 | 0.72615 | 0.68865 | 1.0000 |
| Si | Si40 | 1.0 | 0.52839 | 0.71664 | 0.69682 | 1.0000 |
| Si | Si41 | 1.0 | 0.78350 | 0.97052 | 0.69741 | 1.0000 |
| Si | Si42 | 1.0 | 0.52620 | 0.95950 | 0.69814 | 1.0000 |
| Si | Si43 | 1.0 | 0.45679 | 0.65727 | 0.19114 | 1.0000 |
| Si | Si44 | 1.0 | 0.21640 | 0.27403 | 0.18892 | 1.0000 |
| Si | Si45 | 1.0 | 0.47287 | 0.28270 | 0.19671 | 1.0000 |
| Si | Si46 | 1.0 | 0.21777 | 0.02945 | 0.19666 | 1.0000 |
| Si | Si47 | 1.0 | 0.47481 | 0.03989 | 0.19760 | 1.0000 |
| Si | Si48 | 1.0 | 0.16151 | 0.83769 | 0.12359 | 1.0000 |
| Si | Si49 | 1.0 | 0.53368 | 0.46709 | 0.12569 | 1.0000 |
| Si | Si50 | 1.0 | 0.83866 | 0.16219 | 0.62370 | 1.0000 |
| Si | Si51 | 1.0 | 0.46644 | 0.53292 | 0.62589 | 1.0000 |
| Si | Si52 | 1.0 | 0.52964 | 0.53010 | 0.37506 | 1.0000 |
| Si | Si53 | 1.0 | 0.47126 | 0.46957 | 0.87541 | 1.0000 |
| Si | Si54 | 1.0 | 0.79337 | 0.35534 | 0.70041 | 1.0000 |
| Si | Si55 | 1.0 | 0.35541 | 0.79450 | 0.04759 | 1.0000 |
| Si | Si56 | 1.0 | 0.20637 | 0.64462 | 0.20060 | 1.0000 |
| Si | Si57 | 1.0 | 0.78158 | 0.05237 | 0.80780 | 1.0000 |
| Si | Si58 | 1.0 | 0.21865 | 0.94786 | 0.30749 | 1.0000 |

AlSiAl-T1T7T7T7T9

data\_image0

\_chemical\_formula\_structural H6O128Al6Si58  
\_chemical\_formula\_sum "H6 O128 Al6 Si58"  
\_cell\_length\_a 12.5503  
\_cell\_length\_b 12.5522  
\_cell\_length\_c 26.4687  
\_cell\_angle\_alpha 89.805  
\_cell\_angle\_beta 89.7669  
\_cell\_angle\_gamma 91.0225

\_space\_group\_name\_H-M\_alt "P 1"  
\_space\_group\_IT\_number 1

loop\_

\_space\_group\_symop\_operation\_xyz  
'x, y, z'

loop\_

\_atom\_site\_type\_symbol  
\_atom\_site\_label  
\_atom\_site\_symmetry\_multiplicity  
\_atom\_site\_fract\_x  
\_atom\_site\_fract\_y  
\_atom\_site\_fract\_z  
\_atom\_site\_occupancy  
H H1 1.0 0.48052 0.14015 0.53290 1.0000  
H H2 1.0 0.85861 0.51598 0.71726 1.0000  
H H3 1.0 0.52609 0.85558 0.03202 1.0000  
H H4 1.0 0.12268 0.82220 0.35945 1.0000  
H H5 1.0 0.13676 0.48370 0.21762 1.0000  
H H6 1.0 0.09302 0.01498 0.13772 1.0000  
O O1 1.0 0.37382 0.67080 0.04850 1.0000  
O O2 1.0 0.32922 0.83188 0.98673 1.0000

;

|   |     |     |         |         |         |        |
|---|-----|-----|---------|---------|---------|--------|
| O | O3  | 1.0 | 0.26715 | 0.84108 | 0.08422 | 1.0000 |
| O | O4  | 1.0 | 0.30896 | 0.48841 | 0.00636 | 1.0000 |
| O | O5  | 1.0 | 0.23839 | 0.54215 | 0.09758 | 1.0000 |
| O | O6  | 1.0 | 0.44063 | 0.48480 | 0.08150 | 1.0000 |
| O | O7  | 1.0 | 0.71563 | 0.66045 | 0.05885 | 1.0000 |
| O | O8  | 1.0 | 0.84257 | 0.83270 | 0.04963 | 1.0000 |
| O | O9  | 1.0 | 0.66435 | 0.83975 | 0.10495 | 1.0000 |
| O | O10 | 1.0 | 0.83203 | 0.48761 | 0.05260 | 1.0000 |
| O | O11 | 1.0 | 0.64750 | 0.47795 | 0.09950 | 1.0000 |
| O | O12 | 1.0 | 0.96084 | 0.66037 | 0.05044 | 1.0000 |
| O | O13 | 1.0 | 0.03603 | 0.84155 | 0.09059 | 1.0000 |
| O | O14 | 1.0 | 0.01398 | 0.48623 | 0.10065 | 1.0000 |
| O | O15 | 1.0 | 0.63014 | 0.33240 | 0.55229 | 1.0000 |
| O | O16 | 1.0 | 0.67578 | 0.17243 | 0.49039 | 1.0000 |
| O | O17 | 1.0 | 0.73678 | 0.16202 | 0.58745 | 1.0000 |
| O | O18 | 1.0 | 0.53333 | 0.14185 | 0.56081 | 1.0000 |
| O | O19 | 1.0 | 0.68217 | 0.51507 | 0.50517 | 1.0000 |
| O | O20 | 1.0 | 0.76635 | 0.46734 | 0.59443 | 1.0000 |
| O | O21 | 1.0 | 0.55957 | 0.51776 | 0.58374 | 1.0000 |
| O | O22 | 1.0 | 0.28090 | 0.33380 | 0.56051 | 1.0000 |
| O | O23 | 1.0 | 0.14874 | 0.16597 | 0.55312 | 1.0000 |
| O | O24 | 1.0 | 0.32982 | 0.15218 | 0.60538 | 1.0000 |
| O | O25 | 1.0 | 0.16945 | 0.50885 | 0.55213 | 1.0000 |
| O | O26 | 1.0 | 0.35129 | 0.51553 | 0.60189 | 1.0000 |
| O | O27 | 1.0 | 0.03391 | 0.34110 | 0.55321 | 1.0000 |
| O | O28 | 1.0 | 0.95028 | 0.16158 | 0.59097 | 1.0000 |
| O | O29 | 1.0 | 0.99066 | 0.51684 | 0.60409 | 1.0000 |
| O | O30 | 1.0 | 0.33156 | 0.38139 | 0.31031 | 1.0000 |
| O | O31 | 1.0 | 0.16987 | 0.34942 | 0.24507 | 1.0000 |
| O | O32 | 1.0 | 0.18501 | 0.22774 | 0.32722 | 1.0000 |
| O | O33 | 1.0 | 0.13553 | 0.43566 | 0.33324 | 1.0000 |
| O | O34 | 1.0 | 0.49772 | 0.34687 | 0.24947 | 1.0000 |
| O | O35 | 1.0 | 0.46522 | 0.22714 | 0.33176 | 1.0000 |
| O | O36 | 1.0 | 0.53037 | 0.42911 | 0.33881 | 1.0000 |

|   |     |     |         |         |         |        |
|---|-----|-----|---------|---------|---------|--------|
| O | O37 | 1.0 | 0.35286 | 0.72487 | 0.30882 | 1.0000 |
| O | O38 | 1.0 | 0.20042 | 0.62841 | 0.36373 | 1.0000 |
| O | O39 | 1.0 | 0.52868 | 0.84033 | 0.31540 | 1.0000 |
| O | O40 | 1.0 | 0.53067 | 0.64144 | 0.34325 | 1.0000 |
| O | O41 | 1.0 | 0.35581 | 0.96478 | 0.31737 | 1.0000 |
| O | O42 | 1.0 | 0.15555 | 0.03116 | 0.36076 | 1.0000 |
| O | O43 | 1.0 | 0.54556 | 0.03589 | 0.34506 | 1.0000 |
| O | O44 | 1.0 | 0.66696 | 0.61768 | 0.80961 | 1.0000 |
| O | O45 | 1.0 | 0.82525 | 0.65689 | 0.74248 | 1.0000 |
| O | O46 | 1.0 | 0.81672 | 0.76498 | 0.82838 | 1.0000 |
| O | O47 | 1.0 | 0.86316 | 0.55607 | 0.82641 | 1.0000 |
| O | O48 | 1.0 | 0.50300 | 0.64977 | 0.74864 | 1.0000 |
| O | O49 | 1.0 | 0.53371 | 0.77407 | 0.82884 | 1.0000 |
| O | O50 | 1.0 | 0.46797 | 0.57300 | 0.83979 | 1.0000 |
| O | O51 | 1.0 | 0.65034 | 0.29530 | 0.80878 | 1.0000 |
| O | O52 | 1.0 | 0.81181 | 0.16303 | 0.82625 | 1.0000 |
| O | O53 | 1.0 | 0.81787 | 0.35963 | 0.85860 | 1.0000 |
| O | O54 | 1.0 | 0.48731 | 0.16179 | 0.81892 | 1.0000 |
| O | O55 | 1.0 | 0.46256 | 0.36079 | 0.84175 | 1.0000 |
| O | O56 | 1.0 | 0.65099 | 0.02524 | 0.81301 | 1.0000 |
| O | O57 | 1.0 | 0.83471 | 0.96586 | 0.85347 | 1.0000 |
| O | O58 | 1.0 | 0.46127 | 0.96678 | 0.84655 | 1.0000 |
| O | O59 | 1.0 | 0.62621 | 0.66625 | 0.93767 | 1.0000 |
| O | O60 | 1.0 | 0.65004 | 0.82410 | 0.00583 | 1.0000 |
| O | O61 | 1.0 | 0.76900 | 0.82324 | 0.92260 | 1.0000 |
| O | O62 | 1.0 | 0.55843 | 0.86038 | 0.91959 | 1.0000 |
| O | O63 | 1.0 | 0.65403 | 0.50161 | 0.99968 | 1.0000 |
| O | O64 | 1.0 | 0.77856 | 0.52889 | 0.91814 | 1.0000 |
| O | O65 | 1.0 | 0.57712 | 0.46779 | 0.90901 | 1.0000 |
| O | O66 | 1.0 | 0.28935 | 0.64831 | 0.94229 | 1.0000 |
| O | O67 | 1.0 | 0.16677 | 0.81491 | 0.92234 | 1.0000 |
| O | O68 | 1.0 | 0.36290 | 0.80639 | 0.88778 | 1.0000 |
| O | O69 | 1.0 | 0.16420 | 0.47989 | 0.93298 | 1.0000 |
| O | O70 | 1.0 | 0.36527 | 0.46332 | 0.91123 | 1.0000 |

|   |      |     |         |         |         |        |
|---|------|-----|---------|---------|---------|--------|
| O | O71  | 1.0 | 0.03421 | 0.64967 | 0.93535 | 1.0000 |
| O | O72  | 1.0 | 0.96918 | 0.82835 | 0.89237 | 1.0000 |
| O | O73  | 1.0 | 0.97313 | 0.46332 | 0.90008 | 1.0000 |
| O | O74  | 1.0 | 0.38258 | 0.32793 | 0.44045 | 1.0000 |
| O | O75  | 1.0 | 0.34305 | 0.16916 | 0.50685 | 1.0000 |
| O | O76  | 1.0 | 0.22863 | 0.18381 | 0.42346 | 1.0000 |
| O | O77  | 1.0 | 0.43701 | 0.13072 | 0.42017 | 1.0000 |
| O | O78  | 1.0 | 0.35245 | 0.49185 | 0.50276 | 1.0000 |
| O | O79  | 1.0 | 0.22380 | 0.46015 | 0.42415 | 1.0000 |
| O | O80  | 1.0 | 0.42389 | 0.52767 | 0.41101 | 1.0000 |
| O | O81  | 1.0 | 0.71199 | 0.35542 | 0.44319 | 1.0000 |
| O | O82  | 1.0 | 0.83187 | 0.18903 | 0.42281 | 1.0000 |
| O | O83  | 1.0 | 0.63228 | 0.19494 | 0.39232 | 1.0000 |
| O | O84  | 1.0 | 0.83597 | 0.52715 | 0.43494 | 1.0000 |
| O | O85  | 1.0 | 0.63701 | 0.53773 | 0.40852 | 1.0000 |
| O | O86  | 1.0 | 0.96145 | 0.35633 | 0.43863 | 1.0000 |
| O | O87  | 1.0 | 0.02965 | 0.18326 | 0.39348 | 1.0000 |
| O | O88  | 1.0 | 0.03336 | 0.54176 | 0.40530 | 1.0000 |
| O | O89  | 1.0 | 0.66893 | 0.36354 | 0.69741 | 1.0000 |
| O | O90  | 1.0 | 0.83097 | 0.31950 | 0.75920 | 1.0000 |
| O | O91  | 1.0 | 0.84031 | 0.26044 | 0.66195 | 1.0000 |
| O | O92  | 1.0 | 0.48909 | 0.30960 | 0.74611 | 1.0000 |
| O | O93  | 1.0 | 0.52650 | 0.23809 | 0.65340 | 1.0000 |
| O | O94  | 1.0 | 0.48412 | 0.44386 | 0.67147 | 1.0000 |
| O | O95  | 1.0 | 0.66082 | 0.71708 | 0.68862 | 1.0000 |
| O | O96  | 1.0 | 0.83081 | 0.84839 | 0.69426 | 1.0000 |
| O | O97  | 1.0 | 0.84246 | 0.66582 | 0.64378 | 1.0000 |
| O | O98  | 1.0 | 0.48934 | 0.83284 | 0.69922 | 1.0000 |
| O | O99  | 1.0 | 0.47562 | 0.65018 | 0.64999 | 1.0000 |
| O | O100 | 1.0 | 0.65880 | 0.96665 | 0.69570 | 1.0000 |
| O | O101 | 1.0 | 0.83749 | 0.04703 | 0.65626 | 1.0000 |
| O | O102 | 1.0 | 0.48063 | 0.01142 | 0.64784 | 1.0000 |
| O | O103 | 1.0 | 0.33131 | 0.62840 | 0.20165 | 1.0000 |
| O | O104 | 1.0 | 0.17176 | 0.66672 | 0.26479 | 1.0000 |

|    |      |     |         |         |         |        |
|----|------|-----|---------|---------|---------|--------|
| O  | O105 | 1.0 | 0.16387 | 0.74766 | 0.17119 | 1.0000 |
| O  | O106 | 1.0 | 0.51193 | 0.68499 | 0.24617 | 1.0000 |
| O  | O107 | 1.0 | 0.46533 | 0.76448 | 0.15538 | 1.0000 |
| O  | O108 | 1.0 | 0.51710 | 0.55942 | 0.16861 | 1.0000 |
| O  | O109 | 1.0 | 0.33580 | 0.28675 | 0.19255 | 1.0000 |
| O  | O110 | 1.0 | 0.16515 | 0.15922 | 0.19773 | 1.0000 |
| O  | O111 | 1.0 | 0.15733 | 0.34090 | 0.14554 | 1.0000 |
| O  | O112 | 1.0 | 0.50622 | 0.16805 | 0.19644 | 1.0000 |
| O  | O113 | 1.0 | 0.51832 | 0.35247 | 0.14979 | 1.0000 |
| O  | O114 | 1.0 | 0.33697 | 0.03526 | 0.19210 | 1.0000 |
| O  | O115 | 1.0 | 0.51736 | 0.98776 | 0.14656 | 1.0000 |
| O  | O116 | 1.0 | 0.01277 | 0.82427 | 0.99116 | 1.0000 |
| O  | O117 | 1.0 | 0.00889 | 0.48697 | 0.99964 | 1.0000 |
| O  | O118 | 1.0 | 0.98234 | 0.17935 | 0.49265 | 1.0000 |
| O  | O119 | 1.0 | 0.98761 | 0.51675 | 0.50346 | 1.0000 |
| O  | O120 | 1.0 | 0.17378 | 0.97905 | 0.25291 | 1.0000 |
| O  | O121 | 1.0 | 0.50785 | 0.98963 | 0.24735 | 1.0000 |
| O  | O122 | 1.0 | 0.82361 | 0.01551 | 0.75492 | 1.0000 |
| O  | O123 | 1.0 | 0.48827 | 0.01466 | 0.74850 | 1.0000 |
| O  | O124 | 1.0 | 0.85717 | 0.46365 | 0.68923 | 1.0000 |
| O  | O125 | 1.0 | 0.46935 | 0.85955 | 0.05863 | 1.0000 |
| O  | O126 | 1.0 | 0.17662 | 0.82380 | 0.33280 | 1.0000 |
| O  | O127 | 1.0 | 0.13822 | 0.53854 | 0.19045 | 1.0000 |
| O  | O128 | 1.0 | 0.15031 | 0.97402 | 0.15283 | 1.0000 |
| Al | Al1  | 1.0 | 0.45982 | 0.13521 | 0.62381 | 1.0000 |
| Al | Al2  | 1.0 | 0.86472 | 0.53627 | 0.62634 | 1.0000 |
| Al | Al3  | 1.0 | 0.53439 | 0.86300 | 0.12259 | 1.0000 |
| Al | Al4  | 1.0 | 0.22040 | 0.96308 | 0.31385 | 1.0000 |
| Al | Al5  | 1.0 | 0.13658 | 0.47085 | 0.12646 | 1.0000 |
| Al | Al6  | 1.0 | 0.15536 | 0.83805 | 0.12204 | 1.0000 |
| Si | Si1  | 1.0 | 0.33813 | 0.54659 | 0.05960 | 1.0000 |
| Si | Si2  | 1.0 | 0.72109 | 0.78946 | 0.05689 | 1.0000 |
| Si | Si3  | 1.0 | 0.71246 | 0.53226 | 0.05295 | 1.0000 |
| Si | Si4  | 1.0 | 0.96449 | 0.78940 | 0.04656 | 1.0000 |



|    |      |     |         |         |         |        |
|----|------|-----|---------|---------|---------|--------|
| Si | Si5  | 1.0 | 0.95518 | 0.53079 | 0.05187 | 1.0000 |
| Si | Si6  | 1.0 | 0.65052 | 0.20667 | 0.54814 | 1.0000 |
| Si | Si7  | 1.0 | 0.66214 | 0.45915 | 0.56015 | 1.0000 |
| Si | Si8  | 1.0 | 0.27294 | 0.20479 | 0.55807 | 1.0000 |
| Si | Si9  | 1.0 | 0.28826 | 0.46221 | 0.55504 | 1.0000 |
| Si | Si10 | 1.0 | 0.02913 | 0.21314 | 0.54790 | 1.0000 |
| Si | Si11 | 1.0 | 0.04482 | 0.47090 | 0.55448 | 1.0000 |
| Si | Si12 | 1.0 | 0.20630 | 0.34621 | 0.30457 | 1.0000 |
| Si | Si13 | 1.0 | 0.45665 | 0.34566 | 0.30748 | 1.0000 |
| Si | Si14 | 1.0 | 0.48291 | 0.72275 | 0.30267 | 1.0000 |
| Si | Si15 | 1.0 | 0.48104 | 0.95887 | 0.30567 | 1.0000 |
| Si | Si16 | 1.0 | 0.14849 | 0.51428 | 0.38183 | 1.0000 |
| Si | Si17 | 1.0 | 0.79238 | 0.65081 | 0.80242 | 1.0000 |
| Si | Si18 | 1.0 | 0.54238 | 0.65369 | 0.80679 | 1.0000 |
| Si | Si19 | 1.0 | 0.77741 | 0.28366 | 0.81348 | 1.0000 |
| Si | Si20 | 1.0 | 0.52229 | 0.28209 | 0.80361 | 1.0000 |
| Si | Si21 | 1.0 | 0.77964 | 0.04114 | 0.81150 | 1.0000 |
| Si | Si22 | 1.0 | 0.52333 | 0.04188 | 0.80584 | 1.0000 |
| Si | Si23 | 1.0 | 0.85680 | 0.47727 | 0.87589 | 1.0000 |
| Si | Si24 | 1.0 | 0.65264 | 0.79271 | 0.94571 | 1.0000 |
| Si | Si25 | 1.0 | 0.65910 | 0.54092 | 0.94139 | 1.0000 |
| Si | Si26 | 1.0 | 0.28620 | 0.77559 | 0.93490 | 1.0000 |
| Si | Si27 | 1.0 | 0.28255 | 0.52020 | 0.94852 | 1.0000 |
| Si | Si28 | 1.0 | 0.04480 | 0.77876 | 0.93602 | 1.0000 |
| Si | Si29 | 1.0 | 0.04465 | 0.52161 | 0.94308 | 1.0000 |
| Si | Si30 | 1.0 | 0.47912 | 0.85063 | 0.87089 | 1.0000 |
| Si | Si31 | 1.0 | 0.34610 | 0.20272 | 0.44688 | 1.0000 |
| Si | Si32 | 1.0 | 0.34604 | 0.45191 | 0.44482 | 1.0000 |
| Si | Si33 | 1.0 | 0.71298 | 0.22795 | 0.43687 | 1.0000 |
| Si | Si34 | 1.0 | 0.71642 | 0.48382 | 0.44828 | 1.0000 |
| Si | Si35 | 1.0 | 0.95249 | 0.22728 | 0.43739 | 1.0000 |
| Si | Si36 | 1.0 | 0.95442 | 0.48409 | 0.44662 | 1.0000 |
| Si | Si37 | 1.0 | 0.51972 | 0.14707 | 0.37237 | 1.0000 |
| Si | Si38 | 1.0 | 0.54081 | 0.33629 | 0.69103 | 1.0000 |

|    |      |     |         |         |         |        |
|----|------|-----|---------|---------|---------|--------|
| Si | Si39 | 1.0 | 0.78996 | 0.72454 | 0.69075 | 1.0000 |
| Si | Si40 | 1.0 | 0.53254 | 0.71287 | 0.69626 | 1.0000 |
| Si | Si41 | 1.0 | 0.78681 | 0.96904 | 0.70006 | 1.0000 |
| Si | Si42 | 1.0 | 0.52892 | 0.95689 | 0.69683 | 1.0000 |
| Si | Si43 | 1.0 | 0.45710 | 0.66229 | 0.19125 | 1.0000 |
| Si | Si44 | 1.0 | 0.20713 | 0.28327 | 0.19327 | 1.0000 |
| Si | Si45 | 1.0 | 0.46476 | 0.28854 | 0.19656 | 1.0000 |
| Si | Si46 | 1.0 | 0.46819 | 0.04363 | 0.19486 | 1.0000 |
| Si | Si47 | 1.0 | 0.52990 | 0.47033 | 0.12481 | 1.0000 |
| Si | Si48 | 1.0 | 0.84150 | 0.15727 | 0.62420 | 1.0000 |
| Si | Si49 | 1.0 | 0.46853 | 0.53080 | 0.62677 | 1.0000 |
| Si | Si50 | 1.0 | 0.14974 | 0.15411 | 0.37630 | 1.0000 |
| Si | Si51 | 1.0 | 0.52997 | 0.53273 | 0.37541 | 1.0000 |
| Si | Si52 | 1.0 | 0.84767 | 0.84542 | 0.87440 | 1.0000 |
| Si | Si53 | 1.0 | 0.46884 | 0.46713 | 0.87548 | 1.0000 |
| Si | Si54 | 1.0 | 0.79480 | 0.34510 | 0.70189 | 1.0000 |
| Si | Si55 | 1.0 | 0.35155 | 0.79741 | 0.04503 | 1.0000 |
| Si | Si56 | 1.0 | 0.22880 | 0.70393 | 0.31644 | 1.0000 |
| Si | Si57 | 1.0 | 0.20573 | 0.65335 | 0.20500 | 1.0000 |
| Si | Si58 | 1.0 | 0.21126 | 0.03931 | 0.20261 | 1.0000 |

AlSiAl-T7T7T7T9T9

data\_image0

\_chemical\_formula\_structural H6O128Al6Si58  
\_chemical\_formula\_sum "H6 O128 Al6 Si58"  
\_cell\_length\_a 12.569  
\_cell\_length\_b 12.5488  
\_cell\_length\_c 26.4741  
\_cell\_angle\_alpha 89.9988  
\_cell\_angle\_beta 89.8953  
\_cell\_angle\_gamma 90.8891

\_space\_group\_name\_H-M\_alt "P 1"  
\_space\_group\_IT\_number 1

loop\_

\_space\_group\_symop\_operation\_xyz  
'x, y, z'

loop\_

\_atom\_site\_type\_symbol  
\_atom\_site\_label  
\_atom\_site\_symmetry\_multiplicity  
\_atom\_site\_fract\_x  
\_atom\_site\_fract\_y  
\_atom\_site\_fract\_z  
\_atom\_site\_occupancy  
H H1 1.0 0.47576 0.14444 0.53178 1.0000  
H H2 1.0 0.86236 0.51375 0.71725 1.0000  
H H3 1.0 0.52521 0.85463 0.03149 1.0000  
H H4 1.0 0.13542 0.48701 0.21803 1.0000  
H H5 1.0 0.08478 0.01173 0.14257 1.0000  
H H6 1.0 0.91555 0.98865 0.64297 1.0000  
O O1 1.0 0.36891 0.67241 0.04900 1.0000  
O O2 1.0 0.32631 0.83251 0.98677 1.0000

;

|   |     |     |         |         |         |        |
|---|-----|-----|---------|---------|---------|--------|
| O | O3  | 1.0 | 0.26767 | 0.84683 | 0.08461 | 1.0000 |
| O | O4  | 1.0 | 0.30977 | 0.48897 | 0.00627 | 1.0000 |
| O | O5  | 1.0 | 0.23708 | 0.54027 | 0.09725 | 1.0000 |
| O | O6  | 1.0 | 0.44154 | 0.48851 | 0.08148 | 1.0000 |
| O | O7  | 1.0 | 0.71629 | 0.66179 | 0.05937 | 1.0000 |
| O | O8  | 1.0 | 0.84324 | 0.83372 | 0.04950 | 1.0000 |
| O | O9  | 1.0 | 0.66510 | 0.84213 | 0.10468 | 1.0000 |
| O | O10 | 1.0 | 0.83184 | 0.48892 | 0.05215 | 1.0000 |
| O | O11 | 1.0 | 0.64832 | 0.47963 | 0.10066 | 1.0000 |
| O | O12 | 1.0 | 0.96130 | 0.66120 | 0.05190 | 1.0000 |
| O | O13 | 1.0 | 0.03695 | 0.84439 | 0.09016 | 1.0000 |
| O | O14 | 1.0 | 0.01220 | 0.48612 | 0.10196 | 1.0000 |
| O | O15 | 1.0 | 0.63115 | 0.32778 | 0.54976 | 1.0000 |
| O | O16 | 1.0 | 0.67364 | 0.16864 | 0.48684 | 1.0000 |
| O | O17 | 1.0 | 0.73312 | 0.15295 | 0.58437 | 1.0000 |
| O | O18 | 1.0 | 0.53167 | 0.14070 | 0.55854 | 1.0000 |
| O | O19 | 1.0 | 0.68540 | 0.51095 | 0.50528 | 1.0000 |
| O | O20 | 1.0 | 0.76636 | 0.46074 | 0.59490 | 1.0000 |
| O | O21 | 1.0 | 0.56097 | 0.51238 | 0.58329 | 1.0000 |
| O | O22 | 1.0 | 0.28530 | 0.33629 | 0.56011 | 1.0000 |
| O | O23 | 1.0 | 0.15780 | 0.16509 | 0.54936 | 1.0000 |
| O | O24 | 1.0 | 0.33500 | 0.15493 | 0.60471 | 1.0000 |
| O | O25 | 1.0 | 0.17039 | 0.50944 | 0.55189 | 1.0000 |
| O | O26 | 1.0 | 0.35296 | 0.51917 | 0.60079 | 1.0000 |
| O | O27 | 1.0 | 0.04002 | 0.33797 | 0.55202 | 1.0000 |
| O | O28 | 1.0 | 0.96405 | 0.15483 | 0.59035 | 1.0000 |
| O | O29 | 1.0 | 0.99071 | 0.51313 | 0.60277 | 1.0000 |
| O | O30 | 1.0 | 0.33544 | 0.38587 | 0.30899 | 1.0000 |
| O | O31 | 1.0 | 0.17181 | 0.35330 | 0.24504 | 1.0000 |
| O | O32 | 1.0 | 0.18750 | 0.23712 | 0.32821 | 1.0000 |
| O | O33 | 1.0 | 0.14028 | 0.44630 | 0.33142 | 1.0000 |
| O | O34 | 1.0 | 0.50000 | 0.34863 | 0.24811 | 1.0000 |
| O | O35 | 1.0 | 0.46836 | 0.23038 | 0.33028 | 1.0000 |
| O | O36 | 1.0 | 0.53399 | 0.43181 | 0.33777 | 1.0000 |

|   |     |     |         |         |         |        |
|---|-----|-----|---------|---------|---------|--------|
| O | O37 | 1.0 | 0.35207 | 0.71357 | 0.30994 | 1.0000 |
| O | O38 | 1.0 | 0.18445 | 0.83642 | 0.32648 | 1.0000 |
| O | O39 | 1.0 | 0.19131 | 0.64232 | 0.36376 | 1.0000 |
| O | O40 | 1.0 | 0.51844 | 0.84100 | 0.31629 | 1.0000 |
| O | O41 | 1.0 | 0.53722 | 0.64357 | 0.34301 | 1.0000 |
| O | O42 | 1.0 | 0.34862 | 0.97163 | 0.31464 | 1.0000 |
| O | O43 | 1.0 | 0.16509 | 0.03595 | 0.35328 | 1.0000 |
| O | O44 | 1.0 | 0.53908 | 0.03629 | 0.34388 | 1.0000 |
| O | O45 | 1.0 | 0.66696 | 0.61510 | 0.80998 | 1.0000 |
| O | O46 | 1.0 | 0.82798 | 0.64638 | 0.74423 | 1.0000 |
| O | O47 | 1.0 | 0.81638 | 0.76366 | 0.82723 | 1.0000 |
| O | O48 | 1.0 | 0.86259 | 0.55423 | 0.83060 | 1.0000 |
| O | O49 | 1.0 | 0.50266 | 0.65027 | 0.74898 | 1.0000 |
| O | O50 | 1.0 | 0.53373 | 0.77111 | 0.83019 | 1.0000 |
| O | O51 | 1.0 | 0.46839 | 0.56977 | 0.83928 | 1.0000 |
| O | O52 | 1.0 | 0.64782 | 0.28662 | 0.81031 | 1.0000 |
| O | O53 | 1.0 | 0.81586 | 0.16408 | 0.82618 | 1.0000 |
| O | O54 | 1.0 | 0.80943 | 0.35857 | 0.86314 | 1.0000 |
| O | O55 | 1.0 | 0.48130 | 0.15947 | 0.81722 | 1.0000 |
| O | O56 | 1.0 | 0.46248 | 0.35783 | 0.84299 | 1.0000 |
| O | O57 | 1.0 | 0.65149 | 0.02944 | 0.81444 | 1.0000 |
| O | O58 | 1.0 | 0.46187 | 0.96443 | 0.84503 | 1.0000 |
| O | O59 | 1.0 | 0.62286 | 0.66597 | 0.93834 | 1.0000 |
| O | O60 | 1.0 | 0.65107 | 0.82480 | 0.00568 | 1.0000 |
| O | O61 | 1.0 | 0.76666 | 0.82044 | 0.92151 | 1.0000 |
| O | O62 | 1.0 | 0.55687 | 0.86093 | 0.92010 | 1.0000 |
| O | O63 | 1.0 | 0.65045 | 0.50245 | 0.00130 | 1.0000 |
| O | O64 | 1.0 | 0.77799 | 0.52997 | 0.92178 | 1.0000 |
| O | O65 | 1.0 | 0.57713 | 0.46734 | 0.90963 | 1.0000 |
| O | O66 | 1.0 | 0.28963 | 0.64811 | 0.94191 | 1.0000 |
| O | O67 | 1.0 | 0.16500 | 0.81231 | 0.92160 | 1.0000 |
| O | O68 | 1.0 | 0.36153 | 0.80779 | 0.88797 | 1.0000 |
| O | O69 | 1.0 | 0.16416 | 0.47932 | 0.93316 | 1.0000 |
| O | O70 | 1.0 | 0.36507 | 0.46303 | 0.91121 | 1.0000 |

|   |      |     |         |         |         |        |
|---|------|-----|---------|---------|---------|--------|
| O | O71  | 1.0 | 0.03231 | 0.64703 | 0.93462 | 1.0000 |
| O | O72  | 1.0 | 0.96735 | 0.82600 | 0.89231 | 1.0000 |
| O | O73  | 1.0 | 0.97056 | 0.45727 | 0.90321 | 1.0000 |
| O | O74  | 1.0 | 0.37724 | 0.33224 | 0.43789 | 1.0000 |
| O | O75  | 1.0 | 0.35074 | 0.17395 | 0.50576 | 1.0000 |
| O | O76  | 1.0 | 0.23435 | 0.17642 | 0.42211 | 1.0000 |
| O | O77  | 1.0 | 0.44438 | 0.13784 | 0.41964 | 1.0000 |
| O | O78  | 1.0 | 0.35292 | 0.49482 | 0.50169 | 1.0000 |
| O | O79  | 1.0 | 0.22461 | 0.47148 | 0.42248 | 1.0000 |
| O | O80  | 1.0 | 0.42649 | 0.53053 | 0.40999 | 1.0000 |
| O | O81  | 1.0 | 0.71110 | 0.35218 | 0.44114 | 1.0000 |
| O | O82  | 1.0 | 0.83604 | 0.18723 | 0.42205 | 1.0000 |
| O | O83  | 1.0 | 0.64008 | 0.19118 | 0.38786 | 1.0000 |
| O | O84  | 1.0 | 0.83707 | 0.52143 | 0.43461 | 1.0000 |
| O | O85  | 1.0 | 0.63863 | 0.53754 | 0.40928 | 1.0000 |
| O | O86  | 1.0 | 0.96738 | 0.35302 | 0.43598 | 1.0000 |
| O | O87  | 1.0 | 0.03398 | 0.17591 | 0.39248 | 1.0000 |
| O | O88  | 1.0 | 0.03103 | 0.54196 | 0.40401 | 1.0000 |
| O | O89  | 1.0 | 0.66790 | 0.36954 | 0.70050 | 1.0000 |
| O | O90  | 1.0 | 0.82809 | 0.33039 | 0.76381 | 1.0000 |
| O | O91  | 1.0 | 0.83478 | 0.25190 | 0.66990 | 1.0000 |
| O | O92  | 1.0 | 0.48817 | 0.31105 | 0.74651 | 1.0000 |
| O | O93  | 1.0 | 0.53137 | 0.23688 | 0.65456 | 1.0000 |
| O | O94  | 1.0 | 0.48198 | 0.44167 | 0.67079 | 1.0000 |
| O | O95  | 1.0 | 0.66400 | 0.71308 | 0.69135 | 1.0000 |
| O | O96  | 1.0 | 0.83507 | 0.83832 | 0.69915 | 1.0000 |
| O | O97  | 1.0 | 0.84380 | 0.65947 | 0.64493 | 1.0000 |
| O | O98  | 1.0 | 0.49509 | 0.83179 | 0.69745 | 1.0000 |
| O | O99  | 1.0 | 0.48116 | 0.64797 | 0.64952 | 1.0000 |
| O | O100 | 1.0 | 0.66445 | 0.96504 | 0.69177 | 1.0000 |
| O | O101 | 1.0 | 0.48435 | 0.01178 | 0.64657 | 1.0000 |
| O | O102 | 1.0 | 0.33136 | 0.62998 | 0.20104 | 1.0000 |
| O | O103 | 1.0 | 0.17109 | 0.66987 | 0.26438 | 1.0000 |
| O | O104 | 1.0 | 0.16506 | 0.74840 | 0.17036 | 1.0000 |

|    |      |     |         |         |         |        |
|----|------|-----|---------|---------|---------|--------|
| O  | O105 | 1.0 | 0.51188 | 0.68751 | 0.24620 | 1.0000 |
| O  | O106 | 1.0 | 0.46744 | 0.76267 | 0.15451 | 1.0000 |
| O  | O107 | 1.0 | 0.51687 | 0.55779 | 0.16994 | 1.0000 |
| O  | O108 | 1.0 | 0.33607 | 0.28624 | 0.19246 | 1.0000 |
| O  | O109 | 1.0 | 0.16451 | 0.16158 | 0.19944 | 1.0000 |
| O  | O110 | 1.0 | 0.15702 | 0.34089 | 0.14571 | 1.0000 |
| O  | O111 | 1.0 | 0.50533 | 0.16772 | 0.19614 | 1.0000 |
| O  | O112 | 1.0 | 0.51686 | 0.35174 | 0.14834 | 1.0000 |
| O  | O113 | 1.0 | 0.33533 | 0.03526 | 0.19079 | 1.0000 |
| O  | O114 | 1.0 | 0.51596 | 0.98712 | 0.14595 | 1.0000 |
| O  | O115 | 1.0 | 0.01277 | 0.82176 | 0.99099 | 1.0000 |
| O  | O116 | 1.0 | 0.01188 | 0.48806 | 0.00138 | 1.0000 |
| O  | O117 | 1.0 | 0.98834 | 0.17725 | 0.49121 | 1.0000 |
| O  | O118 | 1.0 | 0.98958 | 0.51225 | 0.50229 | 1.0000 |
| O  | O119 | 1.0 | 0.17854 | 0.98515 | 0.25551 | 1.0000 |
| O  | O120 | 1.0 | 0.50281 | 0.98801 | 0.24651 | 1.0000 |
| O  | O121 | 1.0 | 0.82228 | 0.01416 | 0.75577 | 1.0000 |
| O  | O122 | 1.0 | 0.49616 | 0.01219 | 0.74724 | 1.0000 |
| O  | O123 | 1.0 | 0.85968 | 0.46021 | 0.68962 | 1.0000 |
| O  | O124 | 1.0 | 0.46905 | 0.85876 | 0.05820 | 1.0000 |
| O  | O125 | 1.0 | 0.13880 | 0.54027 | 0.19032 | 1.0000 |
| O  | O126 | 1.0 | 0.83385 | 0.96450 | 0.85377 | 1.0000 |
| O  | O127 | 1.0 | 0.14615 | 0.97404 | 0.15594 | 1.0000 |
| O  | O128 | 1.0 | 0.85356 | 0.02599 | 0.65606 | 1.0000 |
| Al | Al1  | 1.0 | 0.46538 | 0.13652 | 0.62246 | 1.0000 |
| Al | Al2  | 1.0 | 0.86566 | 0.52916 | 0.62634 | 1.0000 |
| Al | Al3  | 1.0 | 0.53463 | 0.86208 | 0.12216 | 1.0000 |
| Al | Al4  | 1.0 | 0.13572 | 0.47117 | 0.12706 | 1.0000 |
| Al | Al5  | 1.0 | 0.15573 | 0.83949 | 0.12212 | 1.0000 |
| Al | Al6  | 1.0 | 0.84466 | 0.16026 | 0.62194 | 1.0000 |
| Si | Si1  | 1.0 | 0.33698 | 0.54733 | 0.05982 | 1.0000 |
| Si | Si2  | 1.0 | 0.72196 | 0.79079 | 0.05690 | 1.0000 |
| Si | Si3  | 1.0 | 0.71217 | 0.53337 | 0.05380 | 1.0000 |
| Si | Si4  | 1.0 | 0.96497 | 0.78996 | 0.04675 | 1.0000 |

|    |      |     |         |         |         |        |
|----|------|-----|---------|---------|---------|--------|
| Si | Si5  | 1.0 | 0.95510 | 0.53152 | 0.05294 | 1.0000 |
| Si | Si6  | 1.0 | 0.65066 | 0.20098 | 0.54540 | 1.0000 |
| Si | Si7  | 1.0 | 0.66341 | 0.45322 | 0.55954 | 1.0000 |
| Si | Si8  | 1.0 | 0.27916 | 0.20732 | 0.55702 | 1.0000 |
| Si | Si9  | 1.0 | 0.28987 | 0.46465 | 0.55405 | 1.0000 |
| Si | Si10 | 1.0 | 0.03622 | 0.20918 | 0.54686 | 1.0000 |
| Si | Si11 | 1.0 | 0.04691 | 0.46766 | 0.55340 | 1.0000 |
| Si | Si12 | 1.0 | 0.20956 | 0.35444 | 0.30443 | 1.0000 |
| Si | Si13 | 1.0 | 0.45985 | 0.34922 | 0.30630 | 1.0000 |
| Si | Si14 | 1.0 | 0.22483 | 0.71581 | 0.31618 | 1.0000 |
| Si | Si15 | 1.0 | 0.48001 | 0.72044 | 0.30320 | 1.0000 |
| Si | Si16 | 1.0 | 0.22033 | 0.95758 | 0.31278 | 1.0000 |
| Si | Si17 | 1.0 | 0.47618 | 0.95939 | 0.30469 | 1.0000 |
| Si | Si18 | 1.0 | 0.14787 | 0.52560 | 0.38048 | 1.0000 |
| Si | Si19 | 1.0 | 0.79272 | 0.64612 | 0.80404 | 1.0000 |
| Si | Si20 | 1.0 | 0.54246 | 0.65146 | 0.80714 | 1.0000 |
| Si | Si21 | 1.0 | 0.77517 | 0.28461 | 0.81590 | 1.0000 |
| Si | Si22 | 1.0 | 0.51989 | 0.27978 | 0.80364 | 1.0000 |
| Si | Si23 | 1.0 | 0.52371 | 0.04120 | 0.80529 | 1.0000 |
| Si | Si24 | 1.0 | 0.85412 | 0.47489 | 0.87966 | 1.0000 |
| Si | Si25 | 1.0 | 0.65109 | 0.79221 | 0.94575 | 1.0000 |
| Si | Si26 | 1.0 | 0.65697 | 0.54097 | 0.94302 | 1.0000 |
| Si | Si27 | 1.0 | 0.28488 | 0.77536 | 0.93476 | 1.0000 |
| Si | Si28 | 1.0 | 0.28249 | 0.52005 | 0.94852 | 1.0000 |
| Si | Si29 | 1.0 | 0.04359 | 0.77610 | 0.93570 | 1.0000 |
| Si | Si30 | 1.0 | 0.04450 | 0.51956 | 0.94417 | 1.0000 |
| Si | Si31 | 1.0 | 0.47823 | 0.84978 | 0.87112 | 1.0000 |
| Si | Si32 | 1.0 | 0.35002 | 0.20589 | 0.44573 | 1.0000 |
| Si | Si33 | 1.0 | 0.34553 | 0.45774 | 0.44323 | 1.0000 |
| Si | Si34 | 1.0 | 0.71591 | 0.22473 | 0.43467 | 1.0000 |
| Si | Si35 | 1.0 | 0.71776 | 0.48023 | 0.44804 | 1.0000 |
| Si | Si36 | 1.0 | 0.95716 | 0.22395 | 0.43623 | 1.0000 |
| Si | Si37 | 1.0 | 0.95652 | 0.48066 | 0.44521 | 1.0000 |
| Si | Si38 | 1.0 | 0.52329 | 0.15034 | 0.37067 | 1.0000 |



|    |      |     |         |         |         |        |
|----|------|-----|---------|---------|---------|--------|
| Si | Si39 | 1.0 | 0.54203 | 0.33684 | 0.69166 | 1.0000 |
| Si | Si40 | 1.0 | 0.79243 | 0.71429 | 0.69304 | 1.0000 |
| Si | Si41 | 1.0 | 0.53524 | 0.71035 | 0.69640 | 1.0000 |
| Si | Si42 | 1.0 | 0.53312 | 0.95587 | 0.69476 | 1.0000 |
| Si | Si43 | 1.0 | 0.45719 | 0.66240 | 0.19151 | 1.0000 |
| Si | Si44 | 1.0 | 0.20764 | 0.28564 | 0.19378 | 1.0000 |
| Si | Si45 | 1.0 | 0.46502 | 0.28912 | 0.19579 | 1.0000 |
| Si | Si46 | 1.0 | 0.46669 | 0.04380 | 0.19388 | 1.0000 |
| Si | Si47 | 1.0 | 0.52993 | 0.47114 | 0.12501 | 1.0000 |
| Si | Si48 | 1.0 | 0.47027 | 0.52860 | 0.62595 | 1.0000 |
| Si | Si49 | 1.0 | 0.15499 | 0.15678 | 0.37436 | 1.0000 |
| Si | Si50 | 1.0 | 0.53324 | 0.53487 | 0.37514 | 1.0000 |
| Si | Si51 | 1.0 | 0.46899 | 0.46545 | 0.87590 | 1.0000 |
| Si | Si52 | 1.0 | 0.79343 | 0.34489 | 0.70498 | 1.0000 |
| Si | Si53 | 1.0 | 0.34970 | 0.79931 | 0.04516 | 1.0000 |
| Si | Si54 | 1.0 | 0.20589 | 0.65530 | 0.20548 | 1.0000 |
| Si | Si55 | 1.0 | 0.77982 | 0.04276 | 0.81289 | 1.0000 |
| Si | Si56 | 1.0 | 0.84625 | 0.84325 | 0.87404 | 1.0000 |
| Si | Si57 | 1.0 | 0.21145 | 0.04260 | 0.20310 | 1.0000 |
| Si | Si58 | 1.0 | 0.78850 | 0.95736 | 0.70338 | 1.0000 |

T2T2T7T7T7T9

data\_image0

\_chemical\_formula\_structural H7O128Al7Si57  
\_chemical\_formula\_sum "H7 O128 Al7 Si57"  
\_cell\_length\_a 12.5701  
\_cell\_length\_b 12.5312  
\_cell\_length\_c 26.5614  
\_cell\_angle\_alpha 89.6955  
\_cell\_angle\_beta 89.8055  
\_cell\_angle\_gamma 90.2428

\_space\_group\_name\_H-M\_alt "P 1"  
\_space\_group\_IT\_number 1

loop\_

\_space\_group\_symop\_operation\_xyz  
'x, y, z'

loop\_

\_atom\_site\_type\_symbol  
\_atom\_site\_label  
\_atom\_site\_symmetry\_multiplicity  
\_atom\_site\_fract\_x  
\_atom\_site\_fract\_y  
\_atom\_site\_fract\_z  
\_atom\_site\_occupancy  
H H1 1.0 0.48039 0.13993 0.53505 1.0000  
H H2 1.0 0.85749 0.51648 0.71433 1.0000  
H H3 1.0 0.58414 0.83759 0.34331 1.0000  
H H4 1.0 0.08561 0.01628 0.13576 1.0000  
H H5 1.0 0.47746 0.84831 0.95794 1.0000  
H H6 1.0 0.16538 0.41492 0.90954 1.0000  
H H7 1.0 0.15168 0.52795 0.29195 1.0000  
O O1 1.0 0.37082 0.66469 0.05386 1.0000

;

|   |     |     |         |         |         |        |
|---|-----|-----|---------|---------|---------|--------|
| O | O2  | 1.0 | 0.34299 | 0.82118 | 0.98535 | 1.0000 |
| O | O3  | 1.0 | 0.24249 | 0.82896 | 0.07531 | 1.0000 |
| O | O4  | 1.0 | 0.45287 | 0.85660 | 0.06483 | 1.0000 |
| O | O5  | 1.0 | 0.32116 | 0.48378 | 0.00706 | 1.0000 |
| O | O6  | 1.0 | 0.21476 | 0.54106 | 0.08913 | 1.0000 |
| O | O7  | 1.0 | 0.41445 | 0.47415 | 0.09460 | 1.0000 |
| O | O8  | 1.0 | 0.70480 | 0.65254 | 0.05846 | 1.0000 |
| O | O9  | 1.0 | 0.83230 | 0.82406 | 0.06531 | 1.0000 |
| O | O10 | 1.0 | 0.64227 | 0.82665 | 0.10480 | 1.0000 |
| O | O11 | 1.0 | 0.83121 | 0.48487 | 0.06942 | 1.0000 |
| O | O12 | 1.0 | 0.62688 | 0.46819 | 0.08870 | 1.0000 |
| O | O13 | 1.0 | 0.95816 | 0.65513 | 0.06082 | 1.0000 |
| O | O14 | 1.0 | 0.02401 | 0.83593 | 0.10293 | 1.0000 |
| O | O15 | 1.0 | 0.01674 | 0.48265 | 0.11129 | 1.0000 |
| O | O16 | 1.0 | 0.62693 | 0.33520 | 0.55316 | 1.0000 |
| O | O17 | 1.0 | 0.67471 | 0.17490 | 0.49120 | 1.0000 |
| O | O18 | 1.0 | 0.73695 | 0.16390 | 0.58685 | 1.0000 |
| O | O19 | 1.0 | 0.53333 | 0.14489 | 0.56265 | 1.0000 |
| O | O20 | 1.0 | 0.66977 | 0.51577 | 0.50267 | 1.0000 |
| O | O21 | 1.0 | 0.76898 | 0.46976 | 0.58936 | 1.0000 |
| O | O22 | 1.0 | 0.56203 | 0.52321 | 0.58519 | 1.0000 |
| O | O23 | 1.0 | 0.28253 | 0.33363 | 0.56128 | 1.0000 |
| O | O24 | 1.0 | 0.14949 | 0.16592 | 0.55611 | 1.0000 |
| O | O25 | 1.0 | 0.33065 | 0.15444 | 0.60817 | 1.0000 |
| O | O26 | 1.0 | 0.17060 | 0.50968 | 0.55175 | 1.0000 |
| O | O27 | 1.0 | 0.35251 | 0.51941 | 0.59967 | 1.0000 |
| O | O28 | 1.0 | 0.03614 | 0.34250 | 0.55424 | 1.0000 |
| O | O29 | 1.0 | 0.95062 | 0.16342 | 0.59193 | 1.0000 |
| O | O30 | 1.0 | 0.99134 | 0.51928 | 0.60265 | 1.0000 |
| O | O31 | 1.0 | 0.34115 | 0.38090 | 0.30480 | 1.0000 |
| O | O32 | 1.0 | 0.17469 | 0.33805 | 0.24476 | 1.0000 |
| O | O33 | 1.0 | 0.17709 | 0.26268 | 0.33839 | 1.0000 |
| O | O34 | 1.0 | 0.51040 | 0.31349 | 0.25366 | 1.0000 |
| O | O35 | 1.0 | 0.45951 | 0.22451 | 0.34076 | 1.0000 |

|   |     |     |         |         |         |        |
|---|-----|-----|---------|---------|---------|--------|
| O | O36 | 1.0 | 0.53725 | 0.42533 | 0.33562 | 1.0000 |
| O | O37 | 1.0 | 0.35276 | 0.74400 | 0.30153 | 1.0000 |
| O | O38 | 1.0 | 0.17350 | 0.84990 | 0.31292 | 1.0000 |
| O | O39 | 1.0 | 0.20308 | 0.66538 | 0.36334 | 1.0000 |
| O | O40 | 1.0 | 0.51769 | 0.63542 | 0.34259 | 1.0000 |
| O | O41 | 1.0 | 0.34105 | 0.98201 | 0.31021 | 1.0000 |
| O | O42 | 1.0 | 0.15524 | 0.05097 | 0.34455 | 1.0000 |
| O | O43 | 1.0 | 0.54580 | 0.03172 | 0.34862 | 1.0000 |
| O | O44 | 1.0 | 0.68098 | 0.61583 | 0.80880 | 1.0000 |
| O | O45 | 1.0 | 0.83194 | 0.65740 | 0.74011 | 1.0000 |
| O | O46 | 1.0 | 0.83801 | 0.75528 | 0.82942 | 1.0000 |
| O | O47 | 1.0 | 0.87695 | 0.54633 | 0.82029 | 1.0000 |
| O | O48 | 1.0 | 0.51390 | 0.64560 | 0.74890 | 1.0000 |
| O | O49 | 1.0 | 0.54306 | 0.76713 | 0.83141 | 1.0000 |
| O | O50 | 1.0 | 0.48432 | 0.56521 | 0.83775 | 1.0000 |
| O | O51 | 1.0 | 0.64982 | 0.30659 | 0.81014 | 1.0000 |
| O | O52 | 1.0 | 0.80232 | 0.15979 | 0.82438 | 1.0000 |
| O | O53 | 1.0 | 0.82560 | 0.35364 | 0.85654 | 1.0000 |
| O | O54 | 1.0 | 0.49402 | 0.16331 | 0.81677 | 1.0000 |
| O | O55 | 1.0 | 0.46044 | 0.35523 | 0.84637 | 1.0000 |
| O | O56 | 1.0 | 0.64787 | 0.01594 | 0.81252 | 1.0000 |
| O | O57 | 1.0 | 0.83756 | 0.96194 | 0.84861 | 1.0000 |
| O | O58 | 1.0 | 0.45262 | 0.97136 | 0.84566 | 1.0000 |
| O | O59 | 1.0 | 0.62914 | 0.65846 | 0.94196 | 1.0000 |
| O | O60 | 1.0 | 0.66443 | 0.82323 | 0.00461 | 1.0000 |
| O | O61 | 1.0 | 0.74029 | 0.82932 | 0.91084 | 1.0000 |
| O | O62 | 1.0 | 0.68873 | 0.48916 | 0.99545 | 1.0000 |
| O | O63 | 1.0 | 0.78152 | 0.53130 | 0.90846 | 1.0000 |
| O | O64 | 1.0 | 0.57825 | 0.46217 | 0.91330 | 1.0000 |
| O | O65 | 1.0 | 0.26168 | 0.64576 | 0.94965 | 1.0000 |
| O | O66 | 1.0 | 0.15330 | 0.82463 | 0.93685 | 1.0000 |
| O | O67 | 1.0 | 0.33741 | 0.79398 | 0.88691 | 1.0000 |
| O | O68 | 1.0 | 0.36726 | 0.47787 | 0.90924 | 1.0000 |
| O | O69 | 1.0 | 0.02552 | 0.65577 | 0.94408 | 1.0000 |

|   |      |     |         |         |         |        |
|---|------|-----|---------|---------|---------|--------|
| O | O70  | 1.0 | 0.95248 | 0.83673 | 0.90545 | 1.0000 |
| O | O71  | 1.0 | 0.97840 | 0.45680 | 0.89935 | 1.0000 |
| O | O72  | 1.0 | 0.37774 | 0.31826 | 0.44217 | 1.0000 |
| O | O73  | 1.0 | 0.33992 | 0.16297 | 0.50941 | 1.0000 |
| O | O74  | 1.0 | 0.23720 | 0.16203 | 0.42155 | 1.0000 |
| O | O75  | 1.0 | 0.44704 | 0.12304 | 0.42747 | 1.0000 |
| O | O76  | 1.0 | 0.35227 | 0.48747 | 0.50159 | 1.0000 |
| O | O77  | 1.0 | 0.23072 | 0.45980 | 0.41869 | 1.0000 |
| O | O78  | 1.0 | 0.43407 | 0.51276 | 0.41281 | 1.0000 |
| O | O79  | 1.0 | 0.70847 | 0.35621 | 0.44203 | 1.0000 |
| O | O80  | 1.0 | 0.83452 | 0.19000 | 0.42523 | 1.0000 |
| O | O81  | 1.0 | 0.63696 | 0.19149 | 0.39319 | 1.0000 |
| O | O82  | 1.0 | 0.83404 | 0.52644 | 0.43831 | 1.0000 |
| O | O83  | 1.0 | 0.64323 | 0.54018 | 0.40382 | 1.0000 |
| O | O84  | 1.0 | 0.96398 | 0.35685 | 0.43746 | 1.0000 |
| O | O85  | 1.0 | 0.03245 | 0.17515 | 0.39742 | 1.0000 |
| O | O86  | 1.0 | 0.02449 | 0.54669 | 0.40235 | 1.0000 |
| O | O87  | 1.0 | 0.66604 | 0.36651 | 0.69684 | 1.0000 |
| O | O88  | 1.0 | 0.82815 | 0.31773 | 0.75772 | 1.0000 |
| O | O89  | 1.0 | 0.83702 | 0.26003 | 0.66151 | 1.0000 |
| O | O90  | 1.0 | 0.48782 | 0.32052 | 0.74829 | 1.0000 |
| O | O91  | 1.0 | 0.52641 | 0.23250 | 0.65854 | 1.0000 |
| O | O92  | 1.0 | 0.47894 | 0.44057 | 0.66915 | 1.0000 |
| O | O93  | 1.0 | 0.66335 | 0.71698 | 0.68703 | 1.0000 |
| O | O94  | 1.0 | 0.83226 | 0.84813 | 0.69276 | 1.0000 |
| O | O95  | 1.0 | 0.84224 | 0.66597 | 0.64140 | 1.0000 |
| O | O96  | 1.0 | 0.49042 | 0.83098 | 0.70142 | 1.0000 |
| O | O97  | 1.0 | 0.47439 | 0.64989 | 0.65178 | 1.0000 |
| O | O98  | 1.0 | 0.65767 | 0.96436 | 0.69325 | 1.0000 |
| O | O99  | 1.0 | 0.83645 | 0.04590 | 0.65449 | 1.0000 |
| O | O100 | 1.0 | 0.47857 | 0.00715 | 0.64707 | 1.0000 |
| O | O101 | 1.0 | 0.33918 | 0.62841 | 0.19755 | 1.0000 |
| O | O102 | 1.0 | 0.18076 | 0.65889 | 0.26470 | 1.0000 |
| O | O103 | 1.0 | 0.18694 | 0.77067 | 0.17790 | 1.0000 |

|    |      |     |         |         |         |        |
|----|------|-----|---------|---------|---------|--------|
| O  | O104 | 1.0 | 0.14330 | 0.55862 | 0.18264 | 1.0000 |
| O  | O105 | 1.0 | 0.51639 | 0.68592 | 0.24486 | 1.0000 |
| O  | O106 | 1.0 | 0.46564 | 0.77891 | 0.15807 | 1.0000 |
| O  | O107 | 1.0 | 0.53102 | 0.57690 | 0.16174 | 1.0000 |
| O  | O108 | 1.0 | 0.34628 | 0.29647 | 0.19173 | 1.0000 |
| O  | O109 | 1.0 | 0.17670 | 0.17172 | 0.18269 | 1.0000 |
| O  | O110 | 1.0 | 0.17371 | 0.36562 | 0.14496 | 1.0000 |
| O  | O111 | 1.0 | 0.50722 | 0.16309 | 0.18304 | 1.0000 |
| O  | O112 | 1.0 | 0.53295 | 0.36398 | 0.15844 | 1.0000 |
| O  | O113 | 1.0 | 0.33966 | 0.03106 | 0.18256 | 1.0000 |
| O  | O114 | 1.0 | 0.52022 | 0.97952 | 0.13896 | 1.0000 |
| O  | O115 | 1.0 | 0.99589 | 0.82578 | 0.00293 | 1.0000 |
| O  | O116 | 1.0 | 0.00428 | 0.47693 | 0.01085 | 1.0000 |
| O  | O117 | 1.0 | 0.98452 | 0.18151 | 0.49466 | 1.0000 |
| O  | O118 | 1.0 | 0.99194 | 0.51646 | 0.50182 | 1.0000 |
| O  | O119 | 1.0 | 0.17644 | 0.00956 | 0.24785 | 1.0000 |
| O  | O120 | 1.0 | 0.50997 | 0.98652 | 0.23929 | 1.0000 |
| O  | O121 | 1.0 | 0.81931 | 0.01713 | 0.75227 | 1.0000 |
| O  | O122 | 1.0 | 0.48818 | 0.01610 | 0.74726 | 1.0000 |
| O  | O123 | 1.0 | 0.85378 | 0.46316 | 0.68681 | 1.0000 |
| O  | O124 | 1.0 | 0.53259 | 0.83506 | 0.31599 | 1.0000 |
| O  | O125 | 1.0 | 0.14968 | 0.98123 | 0.14827 | 1.0000 |
| O  | O126 | 1.0 | 0.53163 | 0.84450 | 0.93046 | 1.0000 |
| O  | O127 | 1.0 | 0.16893 | 0.46353 | 0.93810 | 1.0000 |
| O  | O128 | 1.0 | 0.15361 | 0.47183 | 0.31891 | 1.0000 |
| Al | Al1  | 1.0 | 0.46050 | 0.13433 | 0.62588 | 1.0000 |
| Al | Al2  | 1.0 | 0.86435 | 0.53627 | 0.62368 | 1.0000 |
| Al | Al3  | 1.0 | 0.47571 | 0.97072 | 0.30144 | 1.0000 |
| Al | Al4  | 1.0 | 0.15280 | 0.83917 | 0.12390 | 1.0000 |
| Al | Al5  | 1.0 | 0.45907 | 0.84352 | 0.86726 | 1.0000 |
| Al | Al6  | 1.0 | 0.03157 | 0.52040 | 0.95068 | 1.0000 |
| Al | Al7  | 1.0 | 0.15325 | 0.54296 | 0.38272 | 1.0000 |
| Si | Si1  | 1.0 | 0.34701 | 0.79292 | 0.04607 | 1.0000 |
| Si | Si2  | 1.0 | 0.33046 | 0.54245 | 0.06170 | 1.0000 |

|    |      |     |         |         |         |        |
|----|------|-----|---------|---------|---------|--------|
| Si | Si3  | 1.0 | 0.71252 | 0.78114 | 0.05839 | 1.0000 |
| Si | Si4  | 1.0 | 0.71440 | 0.52442 | 0.05285 | 1.0000 |
| Si | Si5  | 1.0 | 0.95529 | 0.78479 | 0.05814 | 1.0000 |
| Si | Si6  | 1.0 | 0.95380 | 0.52538 | 0.06132 | 1.0000 |
| Si | Si7  | 1.0 | 0.52054 | 0.85965 | 0.11685 | 1.0000 |
| Si | Si8  | 1.0 | 0.64901 | 0.20937 | 0.54866 | 1.0000 |
| Si | Si9  | 1.0 | 0.66005 | 0.46223 | 0.55871 | 1.0000 |
| Si | Si10 | 1.0 | 0.27304 | 0.20447 | 0.56041 | 1.0000 |
| Si | Si11 | 1.0 | 0.28934 | 0.46215 | 0.55421 | 1.0000 |
| Si | Si12 | 1.0 | 0.03043 | 0.21470 | 0.54975 | 1.0000 |
| Si | Si13 | 1.0 | 0.04648 | 0.47253 | 0.55345 | 1.0000 |
| Si | Si14 | 1.0 | 0.46312 | 0.33538 | 0.30946 | 1.0000 |
| Si | Si15 | 1.0 | 0.22487 | 0.73106 | 0.31297 | 1.0000 |
| Si | Si16 | 1.0 | 0.21491 | 0.97284 | 0.30485 | 1.0000 |
| Si | Si17 | 1.0 | 0.80573 | 0.64648 | 0.80038 | 1.0000 |
| Si | Si18 | 1.0 | 0.55579 | 0.65179 | 0.80652 | 1.0000 |
| Si | Si19 | 1.0 | 0.77579 | 0.28303 | 0.81206 | 1.0000 |
| Si | Si20 | 1.0 | 0.52313 | 0.28518 | 0.80446 | 1.0000 |
| Si | Si21 | 1.0 | 0.77467 | 0.03754 | 0.80895 | 1.0000 |
| Si | Si22 | 1.0 | 0.52002 | 0.03896 | 0.80549 | 1.0000 |
| Si | Si23 | 1.0 | 0.86732 | 0.47173 | 0.87118 | 1.0000 |
| Si | Si24 | 1.0 | 0.67027 | 0.53455 | 0.93902 | 1.0000 |
| Si | Si25 | 1.0 | 0.27171 | 0.77406 | 0.93738 | 1.0000 |
| Si | Si26 | 1.0 | 0.03093 | 0.78296 | 0.94728 | 1.0000 |
| Si | Si27 | 1.0 | 0.34795 | 0.19274 | 0.44947 | 1.0000 |
| Si | Si28 | 1.0 | 0.34519 | 0.44465 | 0.44417 | 1.0000 |
| Si | Si29 | 1.0 | 0.71463 | 0.22840 | 0.43796 | 1.0000 |
| Si | Si30 | 1.0 | 0.71467 | 0.48466 | 0.44756 | 1.0000 |
| Si | Si31 | 1.0 | 0.95486 | 0.22822 | 0.43935 | 1.0000 |
| Si | Si32 | 1.0 | 0.95633 | 0.48664 | 0.44494 | 1.0000 |
| Si | Si33 | 1.0 | 0.52325 | 0.14074 | 0.37777 | 1.0000 |
| Si | Si34 | 1.0 | 0.53839 | 0.33714 | 0.69217 | 1.0000 |
| Si | Si35 | 1.0 | 0.79222 | 0.72454 | 0.68888 | 1.0000 |
| Si | Si36 | 1.0 | 0.53592 | 0.71128 | 0.69679 | 1.0000 |

|    |      |     |         |         |         |        |
|----|------|-----|---------|---------|---------|--------|
| Si | Si37 | 1.0 | 0.78520 | 0.96844 | 0.69787 | 1.0000 |
| Si | Si38 | 1.0 | 0.52811 | 0.95511 | 0.69656 | 1.0000 |
| Si | Si39 | 1.0 | 0.21255 | 0.65875 | 0.20412 | 1.0000 |
| Si | Si40 | 1.0 | 0.46183 | 0.66793 | 0.18962 | 1.0000 |
| Si | Si41 | 1.0 | 0.21834 | 0.29413 | 0.19079 | 1.0000 |
| Si | Si42 | 1.0 | 0.47423 | 0.28357 | 0.19685 | 1.0000 |
| Si | Si43 | 1.0 | 0.47063 | 0.03893 | 0.18772 | 1.0000 |
| Si | Si44 | 1.0 | 0.13699 | 0.48719 | 0.13167 | 1.0000 |
| Si | Si45 | 1.0 | 0.52587 | 0.47224 | 0.12563 | 1.0000 |
| Si | Si46 | 1.0 | 0.84077 | 0.15761 | 0.62373 | 1.0000 |
| Si | Si47 | 1.0 | 0.46746 | 0.53253 | 0.62645 | 1.0000 |
| Si | Si48 | 1.0 | 0.15158 | 0.16150 | 0.37594 | 1.0000 |
| Si | Si49 | 1.0 | 0.53243 | 0.52519 | 0.37464 | 1.0000 |
| Si | Si50 | 1.0 | 0.84353 | 0.84437 | 0.87357 | 1.0000 |
| Si | Si51 | 1.0 | 0.47578 | 0.46589 | 0.87598 | 1.0000 |
| Si | Si52 | 1.0 | 0.79175 | 0.34581 | 0.70084 | 1.0000 |
| Si | Si53 | 1.0 | 0.47675 | 0.71616 | 0.30070 | 1.0000 |
| Si | Si54 | 1.0 | 0.21610 | 0.05072 | 0.19361 | 1.0000 |
| Si | Si55 | 1.0 | 0.64788 | 0.78593 | 0.94699 | 1.0000 |
| Si | Si56 | 1.0 | 0.28790 | 0.52131 | 0.95105 | 1.0000 |
| Si | Si57 | 1.0 | 0.21446 | 0.35736 | 0.30202 | 1.0000 |



AlSiAl-T1T7T7T7T7T9T9

data\_image0

\_chemical\_formula\_structural H7O128Al7Si57  
\_chemical\_formula\_sum "H7 O128 Al7 Si57"  
\_cell\_length\_a 12.5408  
\_cell\_length\_b 12.5313  
\_cell\_length\_c 26.4985  
\_cell\_angle\_alpha 90.1744  
\_cell\_angle\_beta 89.8445  
\_cell\_angle\_gamma 91.2274

\_space\_group\_name\_H-M\_alt "P 1"  
\_space\_group\_IT\_number 1

loop\_

\_space\_group\_symop\_operation\_xyz  
'x, y, z'

loop\_

\_atom\_site\_type\_symbol  
\_atom\_site\_label  
\_atom\_site\_symmetry\_multiplicity  
\_atom\_site\_fract\_x  
\_atom\_site\_fract\_y  
\_atom\_site\_fract\_z  
\_atom\_site\_occupancy  
H H1 1.0 0.47553 0.14404 0.53115 1.0000  
H H2 1.0 0.86078 0.51595 0.71707 1.0000  
H H3 1.0 0.52661 0.85415 0.03167 1.0000  
H H4 1.0 0.13732 0.48542 0.21832 1.0000  
H H5 1.0 0.08270 0.00799 0.14388 1.0000  
H H6 1.0 0.90813 0.98499 0.63698 1.0000  
H H7 1.0 0.87482 0.17650 0.85904 1.0000  
O O1 1.0 0.36996 0.66936 0.04932 1.0000

;

|   |     |     |         |         |         |        |
|---|-----|-----|---------|---------|---------|--------|
| O | O2  | 1.0 | 0.32891 | 0.82865 | 0.98700 | 1.0000 |
| O | O3  | 1.0 | 0.26824 | 0.84401 | 0.08458 | 1.0000 |
| O | O4  | 1.0 | 0.31078 | 0.48435 | 0.00619 | 1.0000 |
| O | O5  | 1.0 | 0.23532 | 0.53782 | 0.09653 | 1.0000 |
| O | O6  | 1.0 | 0.44009 | 0.48508 | 0.08208 | 1.0000 |
| O | O7  | 1.0 | 0.71545 | 0.66314 | 0.05849 | 1.0000 |
| O | O8  | 1.0 | 0.84495 | 0.83341 | 0.04837 | 1.0000 |
| O | O9  | 1.0 | 0.66744 | 0.84403 | 0.10449 | 1.0000 |
| O | O10 | 1.0 | 0.83074 | 0.48913 | 0.05176 | 1.0000 |
| O | O11 | 1.0 | 0.64789 | 0.48061 | 0.10033 | 1.0000 |
| O | O12 | 1.0 | 0.96256 | 0.66002 | 0.05109 | 1.0000 |
| O | O13 | 1.0 | 0.03720 | 0.84326 | 0.09050 | 1.0000 |
| O | O14 | 1.0 | 0.01001 | 0.48626 | 0.10308 | 1.0000 |
| O | O15 | 1.0 | 0.62780 | 0.32974 | 0.54823 | 1.0000 |
| O | O16 | 1.0 | 0.67275 | 0.17054 | 0.48560 | 1.0000 |
| O | O17 | 1.0 | 0.73401 | 0.15852 | 0.58298 | 1.0000 |
| O | O18 | 1.0 | 0.53195 | 0.13999 | 0.55773 | 1.0000 |
| O | O19 | 1.0 | 0.68841 | 0.51381 | 0.50573 | 1.0000 |
| O | O20 | 1.0 | 0.76655 | 0.45845 | 0.59507 | 1.0000 |
| O | O21 | 1.0 | 0.56237 | 0.51465 | 0.58330 | 1.0000 |
| O | O22 | 1.0 | 0.28552 | 0.33680 | 0.55926 | 1.0000 |
| O | O23 | 1.0 | 0.15812 | 0.16517 | 0.54738 | 1.0000 |
| O | O24 | 1.0 | 0.33488 | 0.15457 | 0.60347 | 1.0000 |
| O | O25 | 1.0 | 0.17141 | 0.51102 | 0.55148 | 1.0000 |
| O | O26 | 1.0 | 0.35357 | 0.51903 | 0.60075 | 1.0000 |
| O | O27 | 1.0 | 0.04182 | 0.33887 | 0.55076 | 1.0000 |
| O | O28 | 1.0 | 0.96488 | 0.15625 | 0.58926 | 1.0000 |
| O | O29 | 1.0 | 0.99146 | 0.51215 | 0.60295 | 1.0000 |
| O | O30 | 1.0 | 0.33598 | 0.38885 | 0.30907 | 1.0000 |
| O | O31 | 1.0 | 0.17238 | 0.35392 | 0.24499 | 1.0000 |
| O | O32 | 1.0 | 0.18879 | 0.23753 | 0.32763 | 1.0000 |
| O | O33 | 1.0 | 0.13995 | 0.44656 | 0.33155 | 1.0000 |
| O | O34 | 1.0 | 0.50010 | 0.35139 | 0.24797 | 1.0000 |
| O | O35 | 1.0 | 0.46725 | 0.23190 | 0.32935 | 1.0000 |

|   |     |     |         |         |         |        |
|---|-----|-----|---------|---------|---------|--------|
| O | O36 | 1.0 | 0.53538 | 0.43326 | 0.33812 | 1.0000 |
| O | O37 | 1.0 | 0.35415 | 0.71605 | 0.30929 | 1.0000 |
| O | O38 | 1.0 | 0.18570 | 0.83663 | 0.32709 | 1.0000 |
| O | O39 | 1.0 | 0.19557 | 0.64229 | 0.36393 | 1.0000 |
| O | O40 | 1.0 | 0.52155 | 0.84275 | 0.31620 | 1.0000 |
| O | O41 | 1.0 | 0.53916 | 0.64521 | 0.34278 | 1.0000 |
| O | O42 | 1.0 | 0.35038 | 0.97246 | 0.31482 | 1.0000 |
| O | O43 | 1.0 | 0.16642 | 0.03671 | 0.35351 | 1.0000 |
| O | O44 | 1.0 | 0.54186 | 0.03931 | 0.34243 | 1.0000 |
| O | O45 | 1.0 | 0.66925 | 0.61396 | 0.80939 | 1.0000 |
| O | O46 | 1.0 | 0.83021 | 0.64981 | 0.74394 | 1.0000 |
| O | O47 | 1.0 | 0.81430 | 0.76968 | 0.82681 | 1.0000 |
| O | O48 | 1.0 | 0.86652 | 0.56211 | 0.83132 | 1.0000 |
| O | O49 | 1.0 | 0.50318 | 0.64939 | 0.74922 | 1.0000 |
| O | O50 | 1.0 | 0.53854 | 0.77102 | 0.83018 | 1.0000 |
| O | O51 | 1.0 | 0.46957 | 0.56981 | 0.83929 | 1.0000 |
| O | O52 | 1.0 | 0.64551 | 0.27524 | 0.80941 | 1.0000 |
| O | O53 | 1.0 | 0.80078 | 0.36992 | 0.86270 | 1.0000 |
| O | O54 | 1.0 | 0.47044 | 0.15773 | 0.81661 | 1.0000 |
| O | O55 | 1.0 | 0.46550 | 0.35772 | 0.84263 | 1.0000 |
| O | O56 | 1.0 | 0.64343 | 0.03355 | 0.81627 | 1.0000 |
| O | O57 | 1.0 | 0.45319 | 0.96026 | 0.84347 | 1.0000 |
| O | O58 | 1.0 | 0.61525 | 0.66847 | 0.93963 | 1.0000 |
| O | O59 | 1.0 | 0.65075 | 0.82787 | 0.00569 | 1.0000 |
| O | O60 | 1.0 | 0.76939 | 0.81424 | 0.92292 | 1.0000 |
| O | O61 | 1.0 | 0.56072 | 0.86605 | 0.91871 | 1.0000 |
| O | O62 | 1.0 | 0.64936 | 0.50295 | 0.00103 | 1.0000 |
| O | O63 | 1.0 | 0.77645 | 0.54034 | 0.92206 | 1.0000 |
| O | O64 | 1.0 | 0.57768 | 0.46808 | 0.90958 | 1.0000 |
| O | O65 | 1.0 | 0.28526 | 0.64330 | 0.94308 | 1.0000 |
| O | O66 | 1.0 | 0.16836 | 0.81061 | 0.92145 | 1.0000 |
| O | O67 | 1.0 | 0.36702 | 0.79825 | 0.88901 | 1.0000 |
| O | O68 | 1.0 | 0.16336 | 0.47045 | 0.93368 | 1.0000 |
| O | O69 | 1.0 | 0.36480 | 0.46106 | 0.91051 | 1.0000 |

|   |      |     |         |         |         |        |
|---|------|-----|---------|---------|---------|--------|
| O | O70  | 1.0 | 0.03890 | 0.64283 | 0.93752 | 1.0000 |
| O | O71  | 1.0 | 0.96953 | 0.81498 | 0.89242 | 1.0000 |
| O | O72  | 1.0 | 0.96659 | 0.45711 | 0.90445 | 1.0000 |
| O | O73  | 1.0 | 0.38044 | 0.33382 | 0.43753 | 1.0000 |
| O | O74  | 1.0 | 0.35243 | 0.17482 | 0.50488 | 1.0000 |
| O | O75  | 1.0 | 0.23422 | 0.17966 | 0.42195 | 1.0000 |
| O | O76  | 1.0 | 0.44387 | 0.13825 | 0.41823 | 1.0000 |
| O | O77  | 1.0 | 0.35441 | 0.49606 | 0.50156 | 1.0000 |
| O | O78  | 1.0 | 0.22593 | 0.47082 | 0.42234 | 1.0000 |
| O | O79  | 1.0 | 0.42733 | 0.53331 | 0.40988 | 1.0000 |
| O | O80  | 1.0 | 0.71263 | 0.35527 | 0.44134 | 1.0000 |
| O | O81  | 1.0 | 0.83559 | 0.18971 | 0.42083 | 1.0000 |
| O | O82  | 1.0 | 0.63946 | 0.19663 | 0.38684 | 1.0000 |
| O | O83  | 1.0 | 0.83881 | 0.52482 | 0.43416 | 1.0000 |
| O | O84  | 1.0 | 0.63959 | 0.54054 | 0.40987 | 1.0000 |
| O | O85  | 1.0 | 0.96837 | 0.35525 | 0.43531 | 1.0000 |
| O | O86  | 1.0 | 0.03406 | 0.17739 | 0.39162 | 1.0000 |
| O | O87  | 1.0 | 0.03353 | 0.54464 | 0.40452 | 1.0000 |
| O | O88  | 1.0 | 0.66769 | 0.36793 | 0.70058 | 1.0000 |
| O | O89  | 1.0 | 0.82658 | 0.33061 | 0.76369 | 1.0000 |
| O | O90  | 1.0 | 0.83694 | 0.25194 | 0.66978 | 1.0000 |
| O | O91  | 1.0 | 0.48744 | 0.31051 | 0.74613 | 1.0000 |
| O | O92  | 1.0 | 0.53097 | 0.23484 | 0.65422 | 1.0000 |
| O | O93  | 1.0 | 0.48260 | 0.44021 | 0.67002 | 1.0000 |
| O | O94  | 1.0 | 0.66439 | 0.71271 | 0.69175 | 1.0000 |
| O | O95  | 1.0 | 0.83525 | 0.84058 | 0.69681 | 1.0000 |
| O | O96  | 1.0 | 0.84333 | 0.65901 | 0.64454 | 1.0000 |
| O | O97  | 1.0 | 0.49416 | 0.83124 | 0.69801 | 1.0000 |
| O | O98  | 1.0 | 0.48086 | 0.64759 | 0.65009 | 1.0000 |
| O | O99  | 1.0 | 0.66330 | 0.96469 | 0.69162 | 1.0000 |
| O | O100 | 1.0 | 0.48358 | 0.00974 | 0.64580 | 1.0000 |
| O | O101 | 1.0 | 0.33214 | 0.63088 | 0.20106 | 1.0000 |
| O | O102 | 1.0 | 0.17211 | 0.66999 | 0.26474 | 1.0000 |
| O | O103 | 1.0 | 0.16483 | 0.74714 | 0.17057 | 1.0000 |

|    |      |     |         |         |         |        |
|----|------|-----|---------|---------|---------|--------|
| O  | O104 | 1.0 | 0.51411 | 0.68808 | 0.24605 | 1.0000 |
| O  | O105 | 1.0 | 0.46963 | 0.76313 | 0.15464 | 1.0000 |
| O  | O106 | 1.0 | 0.51680 | 0.55762 | 0.16986 | 1.0000 |
| O  | O107 | 1.0 | 0.33630 | 0.28687 | 0.19196 | 1.0000 |
| O  | O108 | 1.0 | 0.16467 | 0.16076 | 0.20006 | 1.0000 |
| O  | O109 | 1.0 | 0.15560 | 0.33948 | 0.14597 | 1.0000 |
| O  | O110 | 1.0 | 0.50556 | 0.16833 | 0.19717 | 1.0000 |
| O  | O111 | 1.0 | 0.51887 | 0.35089 | 0.14853 | 1.0000 |
| O  | O112 | 1.0 | 0.33559 | 0.03506 | 0.19040 | 1.0000 |
| O  | O113 | 1.0 | 0.51685 | 0.98866 | 0.14537 | 1.0000 |
| O  | O114 | 1.0 | 0.01650 | 0.82123 | 0.99105 | 1.0000 |
| O  | O115 | 1.0 | 0.01224 | 0.48285 | 0.00264 | 1.0000 |
| O  | O116 | 1.0 | 0.98734 | 0.17838 | 0.49007 | 1.0000 |
| O  | O117 | 1.0 | 0.98948 | 0.51385 | 0.50254 | 1.0000 |
| O  | O118 | 1.0 | 0.17974 | 0.98444 | 0.25587 | 1.0000 |
| O  | O119 | 1.0 | 0.50317 | 0.98662 | 0.24567 | 1.0000 |
| O  | O120 | 1.0 | 0.82668 | 0.02042 | 0.75206 | 1.0000 |
| O  | O121 | 1.0 | 0.49175 | 0.01299 | 0.74640 | 1.0000 |
| O  | O122 | 1.0 | 0.85958 | 0.46101 | 0.68987 | 1.0000 |
| O  | O123 | 1.0 | 0.47028 | 0.85721 | 0.05853 | 1.0000 |
| O  | O124 | 1.0 | 0.13941 | 0.53913 | 0.19078 | 1.0000 |
| O  | O125 | 1.0 | 0.84320 | 0.96672 | 0.85984 | 1.0000 |
| O  | O126 | 1.0 | 0.14599 | 0.97245 | 0.15644 | 1.0000 |
| O  | O127 | 1.0 | 0.85008 | 0.02543 | 0.65186 | 1.0000 |
| O  | O128 | 1.0 | 0.82198 | 0.17445 | 0.83208 | 1.0000 |
| Al | Al1  | 1.0 | 0.46504 | 0.13421 | 0.62157 | 1.0000 |
| Al | Al2  | 1.0 | 0.86596 | 0.52887 | 0.62615 | 1.0000 |
| Al | Al3  | 1.0 | 0.53649 | 0.86296 | 0.12212 | 1.0000 |
| Al | Al4  | 1.0 | 0.13425 | 0.46993 | 0.12754 | 1.0000 |
| Al | Al5  | 1.0 | 0.15629 | 0.83789 | 0.12230 | 1.0000 |
| Al | Al6  | 1.0 | 0.84529 | 0.16106 | 0.62088 | 1.0000 |
| Al | Al7  | 1.0 | 0.77904 | 0.03488 | 0.81301 | 1.0000 |
| Si | Si1  | 1.0 | 0.33657 | 0.54417 | 0.05973 | 1.0000 |
| Si | Si2  | 1.0 | 0.72269 | 0.79244 | 0.05628 | 1.0000 |

|    |      |     |         |         |         |        |
|----|------|-----|---------|---------|---------|--------|
| Si | Si3  | 1.0 | 0.71140 | 0.53443 | 0.05345 | 1.0000 |
| Si | Si4  | 1.0 | 0.96656 | 0.78914 | 0.04633 | 1.0000 |
| Si | Si5  | 1.0 | 0.95484 | 0.53034 | 0.05340 | 1.0000 |
| Si | Si6  | 1.0 | 0.64994 | 0.20311 | 0.54420 | 1.0000 |
| Si | Si7  | 1.0 | 0.66375 | 0.45422 | 0.55928 | 1.0000 |
| Si | Si8  | 1.0 | 0.27969 | 0.20761 | 0.55594 | 1.0000 |
| Si | Si9  | 1.0 | 0.29060 | 0.46540 | 0.55368 | 1.0000 |
| Si | Si10 | 1.0 | 0.03671 | 0.20995 | 0.54552 | 1.0000 |
| Si | Si11 | 1.0 | 0.04765 | 0.46853 | 0.55313 | 1.0000 |
| Si | Si12 | 1.0 | 0.21005 | 0.35554 | 0.30437 | 1.0000 |
| Si | Si13 | 1.0 | 0.46026 | 0.35152 | 0.30620 | 1.0000 |
| Si | Si14 | 1.0 | 0.22684 | 0.71643 | 0.31633 | 1.0000 |
| Si | Si15 | 1.0 | 0.48246 | 0.72196 | 0.30297 | 1.0000 |
| Si | Si16 | 1.0 | 0.22171 | 0.95795 | 0.31313 | 1.0000 |
| Si | Si17 | 1.0 | 0.47803 | 0.96036 | 0.30418 | 1.0000 |
| Si | Si18 | 1.0 | 0.14980 | 0.52608 | 0.38063 | 1.0000 |
| Si | Si19 | 1.0 | 0.79430 | 0.65144 | 0.80363 | 1.0000 |
| Si | Si20 | 1.0 | 0.54458 | 0.65120 | 0.80701 | 1.0000 |
| Si | Si21 | 1.0 | 0.51547 | 0.27554 | 0.80301 | 1.0000 |
| Si | Si22 | 1.0 | 0.51810 | 0.03983 | 0.80514 | 1.0000 |
| Si | Si23 | 1.0 | 0.85251 | 0.48462 | 0.88040 | 1.0000 |
| Si | Si24 | 1.0 | 0.65092 | 0.79437 | 0.94569 | 1.0000 |
| Si | Si25 | 1.0 | 0.65418 | 0.54510 | 0.94342 | 1.0000 |
| Si | Si26 | 1.0 | 0.28709 | 0.77071 | 0.93514 | 1.0000 |
| Si | Si27 | 1.0 | 0.28169 | 0.51500 | 0.94870 | 1.0000 |
| Si | Si28 | 1.0 | 0.04728 | 0.77229 | 0.93628 | 1.0000 |
| Si | Si29 | 1.0 | 0.04539 | 0.51497 | 0.94562 | 1.0000 |
| Si | Si30 | 1.0 | 0.47993 | 0.84905 | 0.87055 | 1.0000 |
| Si | Si31 | 1.0 | 0.35122 | 0.20742 | 0.44505 | 1.0000 |
| Si | Si32 | 1.0 | 0.34722 | 0.45895 | 0.44312 | 1.0000 |
| Si | Si33 | 1.0 | 0.71580 | 0.22786 | 0.43388 | 1.0000 |
| Si | Si34 | 1.0 | 0.71936 | 0.48347 | 0.44825 | 1.0000 |
| Si | Si35 | 1.0 | 0.95717 | 0.22589 | 0.43529 | 1.0000 |
| Si | Si36 | 1.0 | 0.95772 | 0.48294 | 0.44519 | 1.0000 |

|    |      |     |         |         |         |        |
|----|------|-----|---------|---------|---------|--------|
| Si | Si37 | 1.0 | 0.52338 | 0.15276 | 0.36953 | 1.0000 |
| Si | Si38 | 1.0 | 0.54128 | 0.33527 | 0.69113 | 1.0000 |
| Si | Si39 | 1.0 | 0.79317 | 0.71630 | 0.69238 | 1.0000 |
| Si | Si40 | 1.0 | 0.53538 | 0.71053 | 0.69684 | 1.0000 |
| Si | Si41 | 1.0 | 0.53199 | 0.95603 | 0.69469 | 1.0000 |
| Si | Si42 | 1.0 | 0.45848 | 0.66289 | 0.19153 | 1.0000 |
| Si | Si43 | 1.0 | 0.20754 | 0.28520 | 0.19385 | 1.0000 |
| Si | Si44 | 1.0 | 0.46555 | 0.28972 | 0.19604 | 1.0000 |
| Si | Si45 | 1.0 | 0.46718 | 0.04404 | 0.19361 | 1.0000 |
| Si | Si46 | 1.0 | 0.52981 | 0.47040 | 0.12514 | 1.0000 |
| Si | Si47 | 1.0 | 0.47100 | 0.52865 | 0.62592 | 1.0000 |
| Si | Si48 | 1.0 | 0.15558 | 0.15814 | 0.37406 | 1.0000 |
| Si | Si49 | 1.0 | 0.53469 | 0.53709 | 0.37529 | 1.0000 |
| Si | Si50 | 1.0 | 0.46965 | 0.46549 | 0.87562 | 1.0000 |
| Si | Si51 | 1.0 | 0.79343 | 0.34485 | 0.70411 | 1.0000 |
| Si | Si52 | 1.0 | 0.35108 | 0.79645 | 0.04546 | 1.0000 |
| Si | Si53 | 1.0 | 0.20636 | 0.65499 | 0.20583 | 1.0000 |
| Si | Si54 | 1.0 | 0.84934 | 0.84374 | 0.87576 | 1.0000 |
| Si | Si55 | 1.0 | 0.21171 | 0.04185 | 0.20340 | 1.0000 |
| Si | Si56 | 1.0 | 0.78896 | 0.96035 | 0.70191 | 1.0000 |
| Si | Si57 | 1.0 | 0.77014 | 0.29449 | 0.81582 | 1.0000 |

AlSiAl-T2T7T7T7T9T9

data\_image0

\_chemical\_formula\_structural H7O128Al7Si57  
\_chemical\_formula\_sum "H7 O128 Al7 Si57"  
\_cell\_length\_a 12.5592  
\_cell\_length\_b 12.5246  
\_cell\_length\_c 26.4922  
\_cell\_angle\_alpha 89.7137  
\_cell\_angle\_beta 89.9178  
\_cell\_angle\_gamma 91.1528

\_space\_group\_name\_H-M\_alt "P 1"  
\_space\_group\_IT\_number 1

loop\_

\_space\_group\_symop\_operation\_xyz  
'x, y, z'

loop\_

\_atom\_site\_type\_symbol  
\_atom\_site\_label  
\_atom\_site\_symmetry\_multiplicity  
\_atom\_site\_fract\_x  
\_atom\_site\_fract\_y  
\_atom\_site\_fract\_z  
\_atom\_site\_occupancy  
H H1 1.0 0.47376 0.14569 0.53168 1.0000  
H H2 1.0 0.86160 0.51460 0.71729 1.0000  
H H3 1.0 0.52456 0.85301 0.02892 1.0000  
H H4 1.0 0.13940 0.48704 0.21826 1.0000  
H H5 1.0 0.08104 0.01117 0.14263 1.0000  
H H6 1.0 0.91619 0.99107 0.64339 1.0000  
H H7 1.0 0.58245 0.83801 0.34670 1.0000  
O O1 1.0 0.36833 0.67186 0.04818 1.0000

;



|   |     |     |         |         |         |        |
|---|-----|-----|---------|---------|---------|--------|
| O | O2  | 1.0 | 0.32373 | 0.83104 | 0.98544 | 1.0000 |
| O | O3  | 1.0 | 0.26734 | 0.84610 | 0.08361 | 1.0000 |
| O | O4  | 1.0 | 0.31079 | 0.48647 | 0.00650 | 1.0000 |
| O | O5  | 1.0 | 0.23468 | 0.54089 | 0.09638 | 1.0000 |
| O | O6  | 1.0 | 0.43955 | 0.48900 | 0.08305 | 1.0000 |
| O | O7  | 1.0 | 0.71563 | 0.66285 | 0.05973 | 1.0000 |
| O | O8  | 1.0 | 0.84337 | 0.83431 | 0.04780 | 1.0000 |
| O | O9  | 1.0 | 0.66544 | 0.84612 | 0.10299 | 1.0000 |
| O | O10 | 1.0 | 0.83020 | 0.48909 | 0.05261 | 1.0000 |
| O | O11 | 1.0 | 0.64720 | 0.48096 | 0.10149 | 1.0000 |
| O | O12 | 1.0 | 0.96064 | 0.66131 | 0.05163 | 1.0000 |
| O | O13 | 1.0 | 0.03645 | 0.84501 | 0.08932 | 1.0000 |
| O | O14 | 1.0 | 0.00988 | 0.48732 | 0.10344 | 1.0000 |
| O | O15 | 1.0 | 0.62944 | 0.33088 | 0.54895 | 1.0000 |
| O | O16 | 1.0 | 0.67450 | 0.17089 | 0.48751 | 1.0000 |
| O | O17 | 1.0 | 0.73022 | 0.15644 | 0.58556 | 1.0000 |
| O | O18 | 1.0 | 0.52990 | 0.14269 | 0.55842 | 1.0000 |
| O | O19 | 1.0 | 0.68569 | 0.51726 | 0.50581 | 1.0000 |
| O | O20 | 1.0 | 0.76648 | 0.46124 | 0.59486 | 1.0000 |
| O | O21 | 1.0 | 0.56146 | 0.51483 | 0.58364 | 1.0000 |
| O | O22 | 1.0 | 0.28445 | 0.33554 | 0.56084 | 1.0000 |
| O | O23 | 1.0 | 0.15501 | 0.16536 | 0.55044 | 1.0000 |
| O | O24 | 1.0 | 0.33315 | 0.15339 | 0.60535 | 1.0000 |
| O | O25 | 1.0 | 0.17142 | 0.51055 | 0.55259 | 1.0000 |
| O | O26 | 1.0 | 0.35340 | 0.51865 | 0.60131 | 1.0000 |
| O | O27 | 1.0 | 0.03922 | 0.34013 | 0.55274 | 1.0000 |
| O | O28 | 1.0 | 0.96123 | 0.15615 | 0.59044 | 1.0000 |
| O | O29 | 1.0 | 0.99041 | 0.51584 | 0.60257 | 1.0000 |
| O | O30 | 1.0 | 0.33704 | 0.38554 | 0.30970 | 1.0000 |
| O | O31 | 1.0 | 0.17265 | 0.35452 | 0.24540 | 1.0000 |
| O | O32 | 1.0 | 0.18826 | 0.23674 | 0.32837 | 1.0000 |
| O | O33 | 1.0 | 0.14200 | 0.44622 | 0.33190 | 1.0000 |
| O | O34 | 1.0 | 0.50111 | 0.34440 | 0.24954 | 1.0000 |
| O | O35 | 1.0 | 0.46499 | 0.22491 | 0.33185 | 1.0000 |

|   |     |     |         |         |         |        |
|---|-----|-----|---------|---------|---------|--------|
| O | O36 | 1.0 | 0.53572 | 0.42554 | 0.33932 | 1.0000 |
| O | O37 | 1.0 | 0.35397 | 0.72712 | 0.30910 | 1.0000 |
| O | O38 | 1.0 | 0.17881 | 0.83650 | 0.32652 | 1.0000 |
| O | O39 | 1.0 | 0.19960 | 0.64130 | 0.36314 | 1.0000 |
| O | O40 | 1.0 | 0.53440 | 0.63685 | 0.34193 | 1.0000 |
| O | O41 | 1.0 | 0.34170 | 0.97566 | 0.31681 | 1.0000 |
| O | O42 | 1.0 | 0.15224 | 0.03522 | 0.35163 | 1.0000 |
| O | O43 | 1.0 | 0.54985 | 0.03578 | 0.34850 | 1.0000 |
| O | O44 | 1.0 | 0.66616 | 0.61205 | 0.80987 | 1.0000 |
| O | O45 | 1.0 | 0.82776 | 0.64457 | 0.74444 | 1.0000 |
| O | O46 | 1.0 | 0.81441 | 0.76328 | 0.82640 | 1.0000 |
| O | O47 | 1.0 | 0.86205 | 0.55410 | 0.83176 | 1.0000 |
| O | O48 | 1.0 | 0.50143 | 0.64781 | 0.74905 | 1.0000 |
| O | O49 | 1.0 | 0.53456 | 0.76898 | 0.82963 | 1.0000 |
| O | O50 | 1.0 | 0.46748 | 0.56776 | 0.83986 | 1.0000 |
| O | O51 | 1.0 | 0.64638 | 0.28593 | 0.81029 | 1.0000 |
| O | O52 | 1.0 | 0.81430 | 0.16362 | 0.82655 | 1.0000 |
| O | O53 | 1.0 | 0.80691 | 0.35763 | 0.86381 | 1.0000 |
| O | O54 | 1.0 | 0.48018 | 0.15751 | 0.81767 | 1.0000 |
| O | O55 | 1.0 | 0.46081 | 0.35576 | 0.84309 | 1.0000 |
| O | O56 | 1.0 | 0.65042 | 0.02749 | 0.81449 | 1.0000 |
| O | O57 | 1.0 | 0.45968 | 0.96106 | 0.84360 | 1.0000 |
| O | O58 | 1.0 | 0.61973 | 0.66402 | 0.93799 | 1.0000 |
| O | O59 | 1.0 | 0.65011 | 0.82380 | 0.00459 | 1.0000 |
| O | O60 | 1.0 | 0.76558 | 0.81748 | 0.92084 | 1.0000 |
| O | O61 | 1.0 | 0.55597 | 0.85978 | 0.91912 | 1.0000 |
| O | O62 | 1.0 | 0.64803 | 0.50254 | 0.00227 | 1.0000 |
| O | O63 | 1.0 | 0.77513 | 0.52820 | 0.92246 | 1.0000 |
| O | O64 | 1.0 | 0.57396 | 0.46418 | 0.91094 | 1.0000 |
| O | O65 | 1.0 | 0.28720 | 0.64507 | 0.94188 | 1.0000 |
| O | O66 | 1.0 | 0.16416 | 0.80984 | 0.91979 | 1.0000 |
| O | O67 | 1.0 | 0.36128 | 0.80271 | 0.88697 | 1.0000 |
| O | O68 | 1.0 | 0.16200 | 0.47543 | 0.93437 | 1.0000 |
| O | O69 | 1.0 | 0.36184 | 0.45963 | 0.91100 | 1.0000 |

|   |      |     |         |         |         |        |
|---|------|-----|---------|---------|---------|--------|
| O | O70  | 1.0 | 0.03156 | 0.64467 | 0.93530 | 1.0000 |
| O | O71  | 1.0 | 0.96603 | 0.82288 | 0.89167 | 1.0000 |
| O | O72  | 1.0 | 0.96778 | 0.45506 | 0.90475 | 1.0000 |
| O | O73  | 1.0 | 0.37320 | 0.32970 | 0.43851 | 1.0000 |
| O | O74  | 1.0 | 0.34723 | 0.17195 | 0.50650 | 1.0000 |
| O | O75  | 1.0 | 0.23574 | 0.16848 | 0.42102 | 1.0000 |
| O | O76  | 1.0 | 0.44788 | 0.13732 | 0.42271 | 1.0000 |
| O | O77  | 1.0 | 0.35379 | 0.49337 | 0.50232 | 1.0000 |
| O | O78  | 1.0 | 0.22415 | 0.47217 | 0.42353 | 1.0000 |
| O | O79  | 1.0 | 0.42771 | 0.52711 | 0.41087 | 1.0000 |
| O | O80  | 1.0 | 0.71870 | 0.35707 | 0.44468 | 1.0000 |
| O | O81  | 1.0 | 0.83581 | 0.19001 | 0.42212 | 1.0000 |
| O | O82  | 1.0 | 0.63837 | 0.20472 | 0.38932 | 1.0000 |
| O | O83  | 1.0 | 0.83920 | 0.53003 | 0.43519 | 1.0000 |
| O | O84  | 1.0 | 0.64041 | 0.53844 | 0.40908 | 1.0000 |
| O | O85  | 1.0 | 0.96579 | 0.35785 | 0.43588 | 1.0000 |
| O | O86  | 1.0 | 0.03438 | 0.18163 | 0.39320 | 1.0000 |
| O | O87  | 1.0 | 0.03328 | 0.54603 | 0.40331 | 1.0000 |
| O | O88  | 1.0 | 0.66775 | 0.36828 | 0.70079 | 1.0000 |
| O | O89  | 1.0 | 0.82750 | 0.33126 | 0.76455 | 1.0000 |
| O | O90  | 1.0 | 0.83549 | 0.25185 | 0.67099 | 1.0000 |
| O | O91  | 1.0 | 0.48698 | 0.30958 | 0.74658 | 1.0000 |
| O | O92  | 1.0 | 0.52979 | 0.23723 | 0.65447 | 1.0000 |
| O | O93  | 1.0 | 0.48301 | 0.44241 | 0.67127 | 1.0000 |
| O | O94  | 1.0 | 0.66356 | 0.71331 | 0.69219 | 1.0000 |
| O | O95  | 1.0 | 0.83560 | 0.83821 | 0.69995 | 1.0000 |
| O | O96  | 1.0 | 0.84265 | 0.66020 | 0.64520 | 1.0000 |
| O | O97  | 1.0 | 0.49428 | 0.83155 | 0.69844 | 1.0000 |
| O | O98  | 1.0 | 0.48081 | 0.64910 | 0.64965 | 1.0000 |
| O | O99  | 1.0 | 0.66452 | 0.96412 | 0.69183 | 1.0000 |
| O | O100 | 1.0 | 0.48508 | 0.01088 | 0.64599 | 1.0000 |
| O | O101 | 1.0 | 0.33271 | 0.63483 | 0.20042 | 1.0000 |
| O | O102 | 1.0 | 0.17436 | 0.67025 | 0.26427 | 1.0000 |
| O | O103 | 1.0 | 0.16399 | 0.74998 | 0.17002 | 1.0000 |

|    |      |     |         |         |         |        |
|----|------|-----|---------|---------|---------|--------|
| O  | O104 | 1.0 | 0.51285 | 0.69324 | 0.24514 | 1.0000 |
| O  | O105 | 1.0 | 0.47014 | 0.76632 | 0.15281 | 1.0000 |
| O  | O106 | 1.0 | 0.51730 | 0.56047 | 0.17046 | 1.0000 |
| O  | O107 | 1.0 | 0.33603 | 0.28757 | 0.19317 | 1.0000 |
| O  | O108 | 1.0 | 0.16359 | 0.16196 | 0.20004 | 1.0000 |
| O  | O109 | 1.0 | 0.15674 | 0.34164 | 0.14625 | 1.0000 |
| O  | O110 | 1.0 | 0.50406 | 0.16612 | 0.19585 | 1.0000 |
| O  | O111 | 1.0 | 0.51734 | 0.35333 | 0.15008 | 1.0000 |
| O  | O112 | 1.0 | 0.33319 | 0.03545 | 0.18916 | 1.0000 |
| O  | O113 | 1.0 | 0.51003 | 0.99344 | 0.13974 | 1.0000 |
| O  | O114 | 1.0 | 0.01396 | 0.82137 | 0.99012 | 1.0000 |
| O  | O115 | 1.0 | 0.01114 | 0.48631 | 0.00284 | 1.0000 |
| O  | O116 | 1.0 | 0.98715 | 0.18119 | 0.49148 | 1.0000 |
| O  | O117 | 1.0 | 0.99249 | 0.51572 | 0.50203 | 1.0000 |
| O  | O118 | 1.0 | 0.17491 | 0.98309 | 0.25442 | 1.0000 |
| O  | O119 | 1.0 | 0.50410 | 0.97763 | 0.24055 | 1.0000 |
| O  | O120 | 1.0 | 0.82175 | 0.01455 | 0.75596 | 1.0000 |
| O  | O121 | 1.0 | 0.49623 | 0.01397 | 0.74647 | 1.0000 |
| O  | O122 | 1.0 | 0.85959 | 0.46066 | 0.68983 | 1.0000 |
| O  | O123 | 1.0 | 0.46848 | 0.85863 | 0.05558 | 1.0000 |
| O  | O124 | 1.0 | 0.14080 | 0.54104 | 0.19058 | 1.0000 |
| O  | O125 | 1.0 | 0.83353 | 0.96365 | 0.85377 | 1.0000 |
| O  | O126 | 1.0 | 0.14441 | 0.97521 | 0.15489 | 1.0000 |
| O  | O127 | 1.0 | 0.85305 | 0.02649 | 0.65628 | 1.0000 |
| O  | O128 | 1.0 | 0.53052 | 0.83581 | 0.31943 | 1.0000 |
| Al | Al1  | 1.0 | 0.46424 | 0.13625 | 0.62244 | 1.0000 |
| Al | Al2  | 1.0 | 0.86548 | 0.53010 | 0.62656 | 1.0000 |
| Al | Al3  | 1.0 | 0.53432 | 0.86718 | 0.11921 | 1.0000 |
| Al | Al4  | 1.0 | 0.13445 | 0.47181 | 0.12750 | 1.0000 |
| Al | Al5  | 1.0 | 0.15540 | 0.84131 | 0.12135 | 1.0000 |
| Al | Al6  | 1.0 | 0.84267 | 0.16149 | 0.62259 | 1.0000 |
| Al | Al7  | 1.0 | 0.47552 | 0.96975 | 0.30344 | 1.0000 |
| Si | Si1  | 1.0 | 0.33594 | 0.54675 | 0.05973 | 1.0000 |
| Si | Si2  | 1.0 | 0.72174 | 0.79207 | 0.05594 | 1.0000 |

:

|    |      |     |         |         |         |        |
|----|------|-----|---------|---------|---------|--------|
| Si | Si3  | 1.0 | 0.71089 | 0.53418 | 0.05435 | 1.0000 |
| Si | Si4  | 1.0 | 0.96501 | 0.79026 | 0.04586 | 1.0000 |
| Si | Si5  | 1.0 | 0.95383 | 0.53146 | 0.05378 | 1.0000 |
| Si | Si6  | 1.0 | 0.64916 | 0.20369 | 0.54565 | 1.0000 |
| Si | Si7  | 1.0 | 0.66327 | 0.45591 | 0.55955 | 1.0000 |
| Si | Si8  | 1.0 | 0.27709 | 0.20630 | 0.55774 | 1.0000 |
| Si | Si9  | 1.0 | 0.29010 | 0.46409 | 0.55475 | 1.0000 |
| Si | Si10 | 1.0 | 0.03432 | 0.21119 | 0.54735 | 1.0000 |
| Si | Si11 | 1.0 | 0.04727 | 0.46995 | 0.55362 | 1.0000 |
| Si | Si12 | 1.0 | 0.21070 | 0.35431 | 0.30475 | 1.0000 |
| Si | Si13 | 1.0 | 0.45997 | 0.34382 | 0.30747 | 1.0000 |
| Si | Si14 | 1.0 | 0.22519 | 0.71936 | 0.31586 | 1.0000 |
| Si | Si15 | 1.0 | 0.21568 | 0.95912 | 0.31258 | 1.0000 |
| Si | Si16 | 1.0 | 0.15027 | 0.52633 | 0.38038 | 1.0000 |
| Si | Si17 | 1.0 | 0.79189 | 0.64459 | 0.80420 | 1.0000 |
| Si | Si18 | 1.0 | 0.54183 | 0.64884 | 0.80713 | 1.0000 |
| Si | Si19 | 1.0 | 0.77366 | 0.28431 | 0.81635 | 1.0000 |
| Si | Si20 | 1.0 | 0.51839 | 0.27831 | 0.80381 | 1.0000 |
| Si | Si21 | 1.0 | 0.52276 | 0.03985 | 0.80488 | 1.0000 |
| Si | Si22 | 1.0 | 0.85200 | 0.47380 | 0.88068 | 1.0000 |
| Si | Si23 | 1.0 | 0.64954 | 0.79034 | 0.94496 | 1.0000 |
| Si | Si24 | 1.0 | 0.65412 | 0.53909 | 0.94367 | 1.0000 |
| Si | Si25 | 1.0 | 0.28348 | 0.77236 | 0.93374 | 1.0000 |
| Si | Si26 | 1.0 | 0.28090 | 0.51679 | 0.94889 | 1.0000 |
| Si | Si27 | 1.0 | 0.04298 | 0.77404 | 0.93509 | 1.0000 |
| Si | Si28 | 1.0 | 0.04293 | 0.51700 | 0.94537 | 1.0000 |
| Si | Si29 | 1.0 | 0.47752 | 0.84684 | 0.87017 | 1.0000 |
| Si | Si30 | 1.0 | 0.34901 | 0.20211 | 0.44617 | 1.0000 |
| Si | Si31 | 1.0 | 0.34459 | 0.45543 | 0.44422 | 1.0000 |
| Si | Si32 | 1.0 | 0.71711 | 0.22986 | 0.43586 | 1.0000 |
| Si | Si33 | 1.0 | 0.72080 | 0.48543 | 0.44918 | 1.0000 |
| Si | Si34 | 1.0 | 0.95673 | 0.22830 | 0.43643 | 1.0000 |
| Si | Si35 | 1.0 | 0.95807 | 0.48573 | 0.44505 | 1.0000 |
| Si | Si36 | 1.0 | 0.52607 | 0.14906 | 0.37306 | 1.0000 |

:

|    |      |     |         |         |         |        |
|----|------|-----|---------|---------|---------|--------|
| Si | Si37 | 1.0 | 0.54151 | 0.33630 | 0.69191 | 1.0000 |
| Si | Si38 | 1.0 | 0.79210 | 0.71413 | 0.69355 | 1.0000 |
| Si | Si39 | 1.0 | 0.53458 | 0.71013 | 0.69694 | 1.0000 |
| Si | Si40 | 1.0 | 0.53307 | 0.95578 | 0.69466 | 1.0000 |
| Si | Si41 | 1.0 | 0.45823 | 0.66664 | 0.18994 | 1.0000 |
| Si | Si42 | 1.0 | 0.20755 | 0.28591 | 0.19427 | 1.0000 |
| Si | Si43 | 1.0 | 0.46507 | 0.28743 | 0.19667 | 1.0000 |
| Si | Si44 | 1.0 | 0.46572 | 0.04123 | 0.19112 | 1.0000 |
| Si | Si45 | 1.0 | 0.52908 | 0.47234 | 0.12609 | 1.0000 |
| Si | Si46 | 1.0 | 0.47074 | 0.52945 | 0.62634 | 1.0000 |
| Si | Si47 | 1.0 | 0.15304 | 0.15527 | 0.37397 | 1.0000 |
| Si | Si48 | 1.0 | 0.53379 | 0.52868 | 0.37593 | 1.0000 |
| Si | Si49 | 1.0 | 0.46686 | 0.46271 | 0.87639 | 1.0000 |
| Si | Si50 | 1.0 | 0.79344 | 0.34485 | 0.70561 | 1.0000 |
| Si | Si51 | 1.0 | 0.34853 | 0.79885 | 0.04388 | 1.0000 |
| Si | Si52 | 1.0 | 0.20659 | 0.65740 | 0.20504 | 1.0000 |
| Si | Si53 | 1.0 | 0.77888 | 0.04206 | 0.81301 | 1.0000 |
| Si | Si54 | 1.0 | 0.84517 | 0.84159 | 0.87350 | 1.0000 |
| Si | Si55 | 1.0 | 0.21008 | 0.04226 | 0.20265 | 1.0000 |
| Si | Si56 | 1.0 | 0.78855 | 0.95714 | 0.70374 | 1.0000 |
| Si | Si57 | 1.0 | 0.47972 | 0.71503 | 0.30233 | 1.0000 |

AlSiAl-T7T7T7T7T9T9T9

data\_image0

\_chemical\_formula\_structural H7O128Al7Si57  
\_chemical\_formula\_sum "H7 O128 Al7 Si57"  
\_cell\_length\_a 12.5799  
\_cell\_length\_b 12.5243  
\_cell\_length\_c 26.5118  
\_cell\_angle\_alpha 90.2782  
\_cell\_angle\_beta 89.6145  
\_cell\_angle\_gamma 91.0874

\_space\_group\_name\_H-M\_alt "P 1"  
\_space\_group\_IT\_number 1

loop\_

\_space\_group\_symop\_operation\_xyz  
'x, y, z'

loop\_

\_atom\_site\_type\_symbol  
\_atom\_site\_label  
\_atom\_site\_symmetry\_multiplicity  
\_atom\_site\_fract\_x  
\_atom\_site\_fract\_y  
\_atom\_site\_fract\_z  
\_atom\_site\_occupancy  
H H1 1.0 0.47432 0.14111 0.53111 1.0000  
H H2 1.0 0.85555 0.52079 0.71380 1.0000  
H H3 1.0 0.52901 0.85279 0.03451 1.0000  
H H4 1.0 0.13291 0.48512 0.21799 1.0000  
H H5 1.0 0.90437 0.02069 0.86917 1.0000  
H H6 1.0 0.08465 0.00719 0.14443 1.0000  
H H7 1.0 0.91400 0.99155 0.64054 1.0000  
O O1 1.0 0.37142 0.67014 0.05046 1.0000

:

|   |     |     |         |         |         |        |
|---|-----|-----|---------|---------|---------|--------|
| O | O2  | 1.0 | 0.33797 | 0.83102 | 0.98771 | 1.0000 |
| O | O3  | 1.0 | 0.26669 | 0.84417 | 0.08386 | 1.0000 |
| O | O4  | 1.0 | 0.30681 | 0.48833 | 0.00630 | 1.0000 |
| O | O5  | 1.0 | 0.23944 | 0.53716 | 0.09843 | 1.0000 |
| O | O6  | 1.0 | 0.44196 | 0.48383 | 0.07994 | 1.0000 |
| O | O7  | 1.0 | 0.71745 | 0.65774 | 0.05625 | 1.0000 |
| O | O8  | 1.0 | 0.84257 | 0.83175 | 0.05155 | 1.0000 |
| O | O9  | 1.0 | 0.66541 | 0.83184 | 0.10781 | 1.0000 |
| O | O10 | 1.0 | 0.83380 | 0.48520 | 0.05218 | 1.0000 |
| O | O11 | 1.0 | 0.64849 | 0.47728 | 0.09907 | 1.0000 |
| O | O12 | 1.0 | 0.96154 | 0.65972 | 0.05233 | 1.0000 |
| O | O13 | 1.0 | 0.03537 | 0.84151 | 0.09300 | 1.0000 |
| O | O14 | 1.0 | 0.01489 | 0.48301 | 0.10022 | 1.0000 |
| O | O15 | 1.0 | 0.62522 | 0.32790 | 0.54857 | 1.0000 |
| O | O16 | 1.0 | 0.67202 | 0.16856 | 0.48614 | 1.0000 |
| O | O17 | 1.0 | 0.73089 | 0.15605 | 0.58357 | 1.0000 |
| O | O18 | 1.0 | 0.52991 | 0.13817 | 0.55786 | 1.0000 |
| O | O19 | 1.0 | 0.67717 | 0.51245 | 0.50482 | 1.0000 |
| O | O20 | 1.0 | 0.76888 | 0.45683 | 0.59087 | 1.0000 |
| O | O21 | 1.0 | 0.56387 | 0.51230 | 0.58713 | 1.0000 |
| O | O22 | 1.0 | 0.28426 | 0.33490 | 0.55985 | 1.0000 |
| O | O23 | 1.0 | 0.15572 | 0.16426 | 0.54853 | 1.0000 |
| O | O24 | 1.0 | 0.33231 | 0.15280 | 0.60378 | 1.0000 |
| O | O25 | 1.0 | 0.17204 | 0.50989 | 0.55301 | 1.0000 |
| O | O26 | 1.0 | 0.35406 | 0.51627 | 0.60155 | 1.0000 |
| O | O27 | 1.0 | 0.04043 | 0.33888 | 0.55209 | 1.0000 |
| O | O28 | 1.0 | 0.96211 | 0.15614 | 0.58975 | 1.0000 |
| O | O29 | 1.0 | 0.99074 | 0.51570 | 0.60239 | 1.0000 |
| O | O30 | 1.0 | 0.33610 | 0.38555 | 0.30932 | 1.0000 |
| O | O31 | 1.0 | 0.17235 | 0.35217 | 0.24555 | 1.0000 |
| O | O32 | 1.0 | 0.18856 | 0.23621 | 0.32840 | 1.0000 |
| O | O33 | 1.0 | 0.14130 | 0.44504 | 0.33236 | 1.0000 |
| O | O34 | 1.0 | 0.50042 | 0.35044 | 0.24793 | 1.0000 |
| O | O35 | 1.0 | 0.46921 | 0.23013 | 0.32951 | 1.0000 |

:



|   |     |     |         |         |         |        |
|---|-----|-----|---------|---------|---------|--------|
| O | O36 | 1.0 | 0.53422 | 0.43227 | 0.33780 | 1.0000 |
| O | O37 | 1.0 | 0.35211 | 0.71394 | 0.30992 | 1.0000 |
| O | O38 | 1.0 | 0.18409 | 0.83557 | 0.32626 | 1.0000 |
| O | O39 | 1.0 | 0.19174 | 0.64244 | 0.36405 | 1.0000 |
| O | O40 | 1.0 | 0.51935 | 0.84064 | 0.31506 | 1.0000 |
| O | O41 | 1.0 | 0.53640 | 0.64491 | 0.34415 | 1.0000 |
| O | O42 | 1.0 | 0.34936 | 0.97112 | 0.31634 | 1.0000 |
| O | O43 | 1.0 | 0.16341 | 0.03509 | 0.35283 | 1.0000 |
| O | O44 | 1.0 | 0.54038 | 0.03604 | 0.34409 | 1.0000 |
| O | O45 | 1.0 | 0.66581 | 0.61377 | 0.80671 | 1.0000 |
| O | O46 | 1.0 | 0.82507 | 0.64340 | 0.73976 | 1.0000 |
| O | O47 | 1.0 | 0.81234 | 0.77040 | 0.81982 | 1.0000 |
| O | O48 | 1.0 | 0.86246 | 0.56155 | 0.82806 | 1.0000 |
| O | O49 | 1.0 | 0.49836 | 0.65567 | 0.74992 | 1.0000 |
| O | O50 | 1.0 | 0.53858 | 0.77248 | 0.83194 | 1.0000 |
| O | O51 | 1.0 | 0.46826 | 0.57234 | 0.83980 | 1.0000 |
| O | O52 | 1.0 | 0.64913 | 0.29211 | 0.80970 | 1.0000 |
| O | O53 | 1.0 | 0.81862 | 0.17239 | 0.82242 | 1.0000 |
| O | O54 | 1.0 | 0.81243 | 0.36563 | 0.86164 | 1.0000 |
| O | O55 | 1.0 | 0.48785 | 0.16033 | 0.82006 | 1.0000 |
| O | O56 | 1.0 | 0.46154 | 0.36083 | 0.84113 | 1.0000 |
| O | O57 | 1.0 | 0.65624 | 0.02823 | 0.81656 | 1.0000 |
| O | O58 | 1.0 | 0.46648 | 0.96483 | 0.84742 | 1.0000 |
| O | O59 | 1.0 | 0.61633 | 0.66476 | 0.94224 | 1.0000 |
| O | O60 | 1.0 | 0.64797 | 0.82530 | 0.00884 | 1.0000 |
| O | O61 | 1.0 | 0.76133 | 0.81982 | 0.92368 | 1.0000 |
| O | O62 | 1.0 | 0.55325 | 0.86023 | 0.92357 | 1.0000 |
| O | O63 | 1.0 | 0.65517 | 0.49460 | 0.99949 | 1.0000 |
| O | O64 | 1.0 | 0.77691 | 0.53836 | 0.91932 | 1.0000 |
| O | O65 | 1.0 | 0.57866 | 0.46722 | 0.90815 | 1.0000 |
| O | O66 | 1.0 | 0.29173 | 0.64844 | 0.94265 | 1.0000 |
| O | O67 | 1.0 | 0.17160 | 0.81896 | 0.92700 | 1.0000 |
| O | O68 | 1.0 | 0.36227 | 0.80697 | 0.88775 | 1.0000 |
| O | O69 | 1.0 | 0.16477 | 0.48067 | 0.93181 | 1.0000 |

:

|   |      |     |         |         |         |        |
|---|------|-----|---------|---------|---------|--------|
| O | O70  | 1.0 | 0.36674 | 0.46278 | 0.91176 | 1.0000 |
| O | O71  | 1.0 | 0.03887 | 0.65275 | 0.93660 | 1.0000 |
| O | O72  | 1.0 | 0.97818 | 0.83458 | 0.89416 | 1.0000 |
| O | O73  | 1.0 | 0.97119 | 0.46776 | 0.90097 | 1.0000 |
| O | O74  | 1.0 | 0.37479 | 0.33193 | 0.43793 | 1.0000 |
| O | O75  | 1.0 | 0.34936 | 0.17231 | 0.50513 | 1.0000 |
| O | O76  | 1.0 | 0.23295 | 0.17461 | 0.42215 | 1.0000 |
| O | O77  | 1.0 | 0.44360 | 0.13849 | 0.41894 | 1.0000 |
| O | O78  | 1.0 | 0.35413 | 0.49415 | 0.50239 | 1.0000 |
| O | O79  | 1.0 | 0.22502 | 0.47404 | 0.42338 | 1.0000 |
| O | O80  | 1.0 | 0.42860 | 0.53000 | 0.41115 | 1.0000 |
| O | O81  | 1.0 | 0.71326 | 0.35312 | 0.44188 | 1.0000 |
| O | O82  | 1.0 | 0.83517 | 0.18658 | 0.42172 | 1.0000 |
| O | O83  | 1.0 | 0.63931 | 0.19407 | 0.38757 | 1.0000 |
| O | O84  | 1.0 | 0.83730 | 0.52431 | 0.43758 | 1.0000 |
| O | O85  | 1.0 | 0.64138 | 0.53754 | 0.40812 | 1.0000 |
| O | O86  | 1.0 | 0.96514 | 0.35381 | 0.43613 | 1.0000 |
| O | O87  | 1.0 | 0.03355 | 0.17670 | 0.39231 | 1.0000 |
| O | O88  | 1.0 | 0.03070 | 0.54197 | 0.40401 | 1.0000 |
| O | O89  | 1.0 | 0.66583 | 0.37106 | 0.69935 | 1.0000 |
| O | O90  | 1.0 | 0.82776 | 0.33939 | 0.76186 | 1.0000 |
| O | O91  | 1.0 | 0.83305 | 0.25318 | 0.66965 | 1.0000 |
| O | O92  | 1.0 | 0.48909 | 0.30347 | 0.74578 | 1.0000 |
| O | O93  | 1.0 | 0.52811 | 0.24201 | 0.65162 | 1.0000 |
| O | O94  | 1.0 | 0.47891 | 0.44459 | 0.67401 | 1.0000 |
| O | O95  | 1.0 | 0.65984 | 0.71675 | 0.69110 | 1.0000 |
| O | O96  | 1.0 | 0.83360 | 0.83831 | 0.69643 | 1.0000 |
| O | O97  | 1.0 | 0.83488 | 0.66051 | 0.64054 | 1.0000 |
| O | O98  | 1.0 | 0.49177 | 0.83534 | 0.69761 | 1.0000 |
| O | O99  | 1.0 | 0.47685 | 0.64982 | 0.65058 | 1.0000 |
| O | O100 | 1.0 | 0.66362 | 0.96699 | 0.69141 | 1.0000 |
| O | O101 | 1.0 | 0.48248 | 0.01672 | 0.64888 | 1.0000 |
| O | O102 | 1.0 | 0.33117 | 0.62484 | 0.20170 | 1.0000 |
| O | O103 | 1.0 | 0.17130 | 0.66746 | 0.26469 | 1.0000 |

:

|    |      |     |         |         |         |        |
|----|------|-----|---------|---------|---------|--------|
| O  | O104 | 1.0 | 0.16779 | 0.74598 | 0.17073 | 1.0000 |
| O  | O105 | 1.0 | 0.51187 | 0.68129 | 0.24692 | 1.0000 |
| O  | O106 | 1.0 | 0.46347 | 0.76554 | 0.15801 | 1.0000 |
| O  | O107 | 1.0 | 0.51708 | 0.55977 | 0.16734 | 1.0000 |
| O  | O108 | 1.0 | 0.33677 | 0.28714 | 0.19236 | 1.0000 |
| O  | O109 | 1.0 | 0.16706 | 0.15964 | 0.20005 | 1.0000 |
| O  | O110 | 1.0 | 0.15640 | 0.33823 | 0.14634 | 1.0000 |
| O  | O111 | 1.0 | 0.50628 | 0.16882 | 0.19644 | 1.0000 |
| O  | O112 | 1.0 | 0.51754 | 0.35185 | 0.14820 | 1.0000 |
| O  | O113 | 1.0 | 0.33813 | 0.03416 | 0.18926 | 1.0000 |
| O  | O114 | 1.0 | 0.52283 | 0.98734 | 0.14699 | 1.0000 |
| O  | O115 | 1.0 | 0.01429 | 0.82493 | 0.99380 | 1.0000 |
| O  | O116 | 1.0 | 0.01150 | 0.48830 | 0.99963 | 1.0000 |
| O  | O117 | 1.0 | 0.98663 | 0.17820 | 0.49082 | 1.0000 |
| O  | O118 | 1.0 | 0.99355 | 0.51354 | 0.50225 | 1.0000 |
| O  | O119 | 1.0 | 0.18321 | 0.98346 | 0.25532 | 1.0000 |
| O  | O120 | 1.0 | 0.50201 | 0.98970 | 0.24701 | 1.0000 |
| O  | O121 | 1.0 | 0.82311 | 0.01446 | 0.75393 | 1.0000 |
| O  | O122 | 1.0 | 0.50048 | 0.01372 | 0.74950 | 1.0000 |
| O  | O123 | 1.0 | 0.85634 | 0.46432 | 0.68679 | 1.0000 |
| O  | O124 | 1.0 | 0.47145 | 0.85713 | 0.06110 | 1.0000 |
| O  | O125 | 1.0 | 0.13691 | 0.53821 | 0.19037 | 1.0000 |
| O  | O126 | 1.0 | 0.84631 | 0.98050 | 0.85312 | 1.0000 |
| O  | O127 | 1.0 | 0.14828 | 0.97168 | 0.15634 | 1.0000 |
| O  | O128 | 1.0 | 0.85176 | 0.02743 | 0.65439 | 1.0000 |
| Al | Al1  | 1.0 | 0.46273 | 0.13802 | 0.62161 | 1.0000 |
| Al | Al2  | 1.0 | 0.86345 | 0.53019 | 0.62343 | 1.0000 |
| Al | Al3  | 1.0 | 0.53612 | 0.85979 | 0.12451 | 1.0000 |
| Al | Al4  | 1.0 | 0.13621 | 0.46833 | 0.12704 | 1.0000 |
| Al | Al5  | 1.0 | 0.84894 | 0.83565 | 0.87464 | 1.0000 |
| Al | Al6  | 1.0 | 0.15642 | 0.83649 | 0.12257 | 1.0000 |
| Al | Al7  | 1.0 | 0.84220 | 0.16286 | 0.62086 | 1.0000 |
| Si | Si1  | 1.0 | 0.33765 | 0.54489 | 0.05992 | 1.0000 |
| Si | Si2  | 1.0 | 0.72148 | 0.78706 | 0.05812 | 1.0000 |

:

|    |      |     |         |         |         |        |
|----|------|-----|---------|---------|---------|--------|
| Si | Si3  | 1.0 | 0.71407 | 0.52896 | 0.05221 | 1.0000 |
| Si | Si4  | 1.0 | 0.96468 | 0.78913 | 0.04845 | 1.0000 |
| Si | Si5  | 1.0 | 0.95650 | 0.52983 | 0.05216 | 1.0000 |
| Si | Si6  | 1.0 | 0.64783 | 0.20137 | 0.54452 | 1.0000 |
| Si | Si7  | 1.0 | 0.66112 | 0.45265 | 0.55896 | 1.0000 |
| Si | Si8  | 1.0 | 0.27733 | 0.20575 | 0.55628 | 1.0000 |
| Si | Si9  | 1.0 | 0.29066 | 0.46353 | 0.55455 | 1.0000 |
| Si | Si10 | 1.0 | 0.03496 | 0.20996 | 0.54626 | 1.0000 |
| Si | Si11 | 1.0 | 0.04834 | 0.46886 | 0.55352 | 1.0000 |
| Si | Si12 | 1.0 | 0.21043 | 0.35368 | 0.30470 | 1.0000 |
| Si | Si13 | 1.0 | 0.46042 | 0.34950 | 0.30612 | 1.0000 |
| Si | Si14 | 1.0 | 0.22489 | 0.71492 | 0.31613 | 1.0000 |
| Si | Si15 | 1.0 | 0.48011 | 0.71927 | 0.30330 | 1.0000 |
| Si | Si16 | 1.0 | 0.22126 | 0.95671 | 0.31290 | 1.0000 |
| Si | Si17 | 1.0 | 0.47652 | 0.95933 | 0.30492 | 1.0000 |
| Si | Si18 | 1.0 | 0.14827 | 0.52577 | 0.38103 | 1.0000 |
| Si | Si19 | 1.0 | 0.79082 | 0.65072 | 0.80023 | 1.0000 |
| Si | Si20 | 1.0 | 0.54269 | 0.65341 | 0.80725 | 1.0000 |
| Si | Si21 | 1.0 | 0.77623 | 0.29451 | 0.81402 | 1.0000 |
| Si | Si22 | 1.0 | 0.52122 | 0.28081 | 0.80352 | 1.0000 |
| Si | Si23 | 1.0 | 0.52708 | 0.04119 | 0.80760 | 1.0000 |
| Si | Si24 | 1.0 | 0.85499 | 0.48449 | 0.87761 | 1.0000 |
| Si | Si25 | 1.0 | 0.64866 | 0.79176 | 0.94852 | 1.0000 |
| Si | Si26 | 1.0 | 0.65656 | 0.54160 | 0.94266 | 1.0000 |
| Si | Si27 | 1.0 | 0.28984 | 0.77624 | 0.93652 | 1.0000 |
| Si | Si28 | 1.0 | 0.28275 | 0.52030 | 0.94852 | 1.0000 |
| Si | Si29 | 1.0 | 0.04834 | 0.78286 | 0.93790 | 1.0000 |
| Si | Si30 | 1.0 | 0.04636 | 0.52457 | 0.94334 | 1.0000 |
| Si | Si31 | 1.0 | 0.48042 | 0.84907 | 0.87323 | 1.0000 |
| Si | Si32 | 1.0 | 0.34853 | 0.20514 | 0.44533 | 1.0000 |
| Si | Si33 | 1.0 | 0.34560 | 0.45812 | 0.44379 | 1.0000 |
| Si | Si34 | 1.0 | 0.71554 | 0.22547 | 0.43437 | 1.0000 |
| Si | Si35 | 1.0 | 0.71710 | 0.48169 | 0.44847 | 1.0000 |
| Si | Si36 | 1.0 | 0.95593 | 0.22442 | 0.43593 | 1.0000 |

:

|    |      |     |         |         |         |        |
|----|------|-----|---------|---------|---------|--------|
| Si | Si37 | 1.0 | 0.95668 | 0.48181 | 0.44583 | 1.0000 |
| Si | Si38 | 1.0 | 0.52334 | 0.15106 | 0.37020 | 1.0000 |
| Si | Si39 | 1.0 | 0.53997 | 0.33765 | 0.69126 | 1.0000 |
| Si | Si40 | 1.0 | 0.78807 | 0.71435 | 0.69012 | 1.0000 |
| Si | Si41 | 1.0 | 0.53127 | 0.71344 | 0.69705 | 1.0000 |
| Si | Si42 | 1.0 | 0.53226 | 0.95880 | 0.69576 | 1.0000 |
| Si | Si43 | 1.0 | 0.45620 | 0.66068 | 0.19208 | 1.0000 |
| Si | Si44 | 1.0 | 0.20843 | 0.28447 | 0.19412 | 1.0000 |
| Si | Si45 | 1.0 | 0.46559 | 0.29004 | 0.19573 | 1.0000 |
| Si | Si46 | 1.0 | 0.46915 | 0.04420 | 0.19393 | 1.0000 |
| Si | Si47 | 1.0 | 0.53015 | 0.47010 | 0.12356 | 1.0000 |
| Si | Si48 | 1.0 | 0.46931 | 0.52897 | 0.62795 | 1.0000 |
| Si | Si49 | 1.0 | 0.15438 | 0.15610 | 0.37421 | 1.0000 |
| Si | Si50 | 1.0 | 0.53423 | 0.53528 | 0.37544 | 1.0000 |
| Si | Si51 | 1.0 | 0.46948 | 0.46713 | 0.87560 | 1.0000 |
| Si | Si52 | 1.0 | 0.79176 | 0.34936 | 0.70312 | 1.0000 |
| Si | Si53 | 1.0 | 0.35354 | 0.79750 | 0.04639 | 1.0000 |
| Si | Si54 | 1.0 | 0.20623 | 0.65237 | 0.20576 | 1.0000 |
| Si | Si55 | 1.0 | 0.78078 | 0.05199 | 0.80912 | 1.0000 |
| Si | Si56 | 1.0 | 0.21468 | 0.04084 | 0.20281 | 1.0000 |
| Si | Si57 | 1.0 | 0.78771 | 0.95719 | 0.70121 | 1.0000 |

AlSiAl-T1T1T7T7T7T9T9

data\_image0

\_chemical\_formula\_structural H8O128Al8Si56  
\_chemical\_formula\_sum "H8 O128 Al8 Si56"  
\_cell\_length\_a 12.5218  
\_cell\_length\_b 12.5274  
\_cell\_length\_c 26.5272  
\_cell\_angle\_alpha 90.0813  
\_cell\_angle\_beta 89.8982  
\_cell\_angle\_gamma 91.4987

\_space\_group\_name\_H-M\_alt "P 1"  
\_space\_group\_IT\_number 1

loop\_

\_space\_group\_symop\_operation\_xyz  
'x, y, z'

loop\_

\_atom\_site\_type\_symbol  
\_atom\_site\_label  
\_atom\_site\_symmetry\_multiplicity  
\_atom\_site\_fract\_x  
\_atom\_site\_fract\_y  
\_atom\_site\_fract\_z  
\_atom\_site\_occupancy  
H H1 1.0 0.47347 0.14398 0.53095 1.0000  
H H2 1.0 0.85847 0.51725 0.71730 1.0000  
H H3 1.0 0.52728 0.85484 0.03152 1.0000  
H H4 1.0 0.14074 0.48307 0.21768 1.0000  
H H5 1.0 0.09086 0.01240 0.13780 1.0000  
H H6 1.0 0.90957 0.98818 0.63770 1.0000  
H H7 1.0 0.87118 0.17656 0.86050 1.0000  
H H8 1.0 0.12768 0.82451 0.36025 1.0000

:

|   |     |     |         |         |         |        |
|---|-----|-----|---------|---------|---------|--------|
| O | O1  | 1.0 | 0.37354 | 0.66784 | 0.04856 | 1.0000 |
| O | O2  | 1.0 | 0.32973 | 0.82738 | 0.98671 | 1.0000 |
| O | O3  | 1.0 | 0.26856 | 0.83914 | 0.08418 | 1.0000 |
| O | O4  | 1.0 | 0.31013 | 0.48310 | 0.00612 | 1.0000 |
| O | O5  | 1.0 | 0.23407 | 0.53999 | 0.09581 | 1.0000 |
| O | O6  | 1.0 | 0.43786 | 0.48282 | 0.08274 | 1.0000 |
| O | O7  | 1.0 | 0.71586 | 0.66461 | 0.05798 | 1.0000 |
| O | O8  | 1.0 | 0.84512 | 0.83496 | 0.04714 | 1.0000 |
| O | O9  | 1.0 | 0.66809 | 0.84596 | 0.10365 | 1.0000 |
| O | O10 | 1.0 | 0.82932 | 0.48937 | 0.05122 | 1.0000 |
| O | O11 | 1.0 | 0.64689 | 0.48290 | 0.10010 | 1.0000 |
| O | O12 | 1.0 | 0.96103 | 0.66024 | 0.05048 | 1.0000 |
| O | O13 | 1.0 | 0.03738 | 0.84286 | 0.08942 | 1.0000 |
| O | O14 | 1.0 | 0.00875 | 0.48726 | 0.10312 | 1.0000 |
| O | O15 | 1.0 | 0.62655 | 0.33168 | 0.54856 | 1.0000 |
| O | O16 | 1.0 | 0.67028 | 0.17309 | 0.48592 | 1.0000 |
| O | O17 | 1.0 | 0.73183 | 0.16007 | 0.58332 | 1.0000 |
| O | O18 | 1.0 | 0.52981 | 0.14095 | 0.55772 | 1.0000 |
| O | O19 | 1.0 | 0.68761 | 0.51688 | 0.50605 | 1.0000 |
| O | O20 | 1.0 | 0.76753 | 0.45960 | 0.59480 | 1.0000 |
| O | O21 | 1.0 | 0.56346 | 0.51659 | 0.58413 | 1.0000 |
| O | O22 | 1.0 | 0.28541 | 0.33479 | 0.55810 | 1.0000 |
| O | O23 | 1.0 | 0.15575 | 0.16469 | 0.54659 | 1.0000 |
| O | O24 | 1.0 | 0.33218 | 0.15252 | 0.60301 | 1.0000 |
| O | O25 | 1.0 | 0.17199 | 0.51023 | 0.55163 | 1.0000 |
| O | O26 | 1.0 | 0.35391 | 0.51635 | 0.60064 | 1.0000 |
| O | O27 | 1.0 | 0.04033 | 0.33954 | 0.54955 | 1.0000 |
| O | O28 | 1.0 | 0.96317 | 0.15726 | 0.58888 | 1.0000 |
| O | O29 | 1.0 | 0.99239 | 0.51120 | 0.60366 | 1.0000 |
| O | O30 | 1.0 | 0.33325 | 0.38874 | 0.30913 | 1.0000 |
| O | O31 | 1.0 | 0.17168 | 0.35107 | 0.24437 | 1.0000 |
| O | O32 | 1.0 | 0.18978 | 0.23079 | 0.32651 | 1.0000 |
| O | O33 | 1.0 | 0.13566 | 0.43768 | 0.33226 | 1.0000 |
| O | O34 | 1.0 | 0.49846 | 0.35310 | 0.24817 | 1.0000 |

:

|   |     |     |         |         |         |        |
|---|-----|-----|---------|---------|---------|--------|
| O | O35 | 1.0 | 0.46401 | 0.23192 | 0.32909 | 1.0000 |
| O | O36 | 1.0 | 0.53340 | 0.43369 | 0.33814 | 1.0000 |
| O | O37 | 1.0 | 0.35608 | 0.72607 | 0.30908 | 1.0000 |
| O | O38 | 1.0 | 0.20247 | 0.63044 | 0.36318 | 1.0000 |
| O | O39 | 1.0 | 0.53152 | 0.84412 | 0.31539 | 1.0000 |
| O | O40 | 1.0 | 0.53616 | 0.64576 | 0.34333 | 1.0000 |
| O | O41 | 1.0 | 0.35792 | 0.96759 | 0.31595 | 1.0000 |
| O | O42 | 1.0 | 0.15668 | 0.03408 | 0.35934 | 1.0000 |
| O | O43 | 1.0 | 0.54913 | 0.04259 | 0.34119 | 1.0000 |
| O | O44 | 1.0 | 0.66854 | 0.61300 | 0.80959 | 1.0000 |
| O | O45 | 1.0 | 0.82889 | 0.64984 | 0.74394 | 1.0000 |
| O | O46 | 1.0 | 0.81359 | 0.76986 | 0.82656 | 1.0000 |
| O | O47 | 1.0 | 0.86623 | 0.56254 | 0.83146 | 1.0000 |
| O | O48 | 1.0 | 0.50306 | 0.64879 | 0.74903 | 1.0000 |
| O | O49 | 1.0 | 0.53872 | 0.77063 | 0.82969 | 1.0000 |
| O | O50 | 1.0 | 0.46823 | 0.56931 | 0.83909 | 1.0000 |
| O | O51 | 1.0 | 0.64414 | 0.27501 | 0.80899 | 1.0000 |
| O | O52 | 1.0 | 0.79838 | 0.37048 | 0.86259 | 1.0000 |
| O | O53 | 1.0 | 0.46907 | 0.15678 | 0.81655 | 1.0000 |
| O | O54 | 1.0 | 0.46411 | 0.35710 | 0.84231 | 1.0000 |
| O | O55 | 1.0 | 0.64256 | 0.03302 | 0.81577 | 1.0000 |
| O | O56 | 1.0 | 0.45188 | 0.95894 | 0.84246 | 1.0000 |
| O | O57 | 1.0 | 0.61409 | 0.66909 | 0.93901 | 1.0000 |
| O | O58 | 1.0 | 0.65012 | 0.82855 | 0.00502 | 1.0000 |
| O | O59 | 1.0 | 0.77005 | 0.81394 | 0.92278 | 1.0000 |
| O | O60 | 1.0 | 0.56196 | 0.86719 | 0.91762 | 1.0000 |
| O | O61 | 1.0 | 0.64737 | 0.50446 | 0.00089 | 1.0000 |
| O | O62 | 1.0 | 0.77518 | 0.54073 | 0.92199 | 1.0000 |
| O | O63 | 1.0 | 0.57632 | 0.46804 | 0.90941 | 1.0000 |
| O | O64 | 1.0 | 0.28513 | 0.64217 | 0.94306 | 1.0000 |
| O | O65 | 1.0 | 0.16902 | 0.80957 | 0.92093 | 1.0000 |
| O | O66 | 1.0 | 0.36789 | 0.79671 | 0.88890 | 1.0000 |
| O | O67 | 1.0 | 0.16200 | 0.46970 | 0.93366 | 1.0000 |
| O | O68 | 1.0 | 0.36334 | 0.45973 | 0.91031 | 1.0000 |

:



|   |      |     |         |         |         |        |
|---|------|-----|---------|---------|---------|--------|
| O | O69  | 1.0 | 0.03772 | 0.64230 | 0.93686 | 1.0000 |
| O | O70  | 1.0 | 0.97011 | 0.81520 | 0.89162 | 1.0000 |
| O | O71  | 1.0 | 0.96464 | 0.45618 | 0.90479 | 1.0000 |
| O | O72  | 1.0 | 0.38662 | 0.33144 | 0.43892 | 1.0000 |
| O | O73  | 1.0 | 0.35119 | 0.17127 | 0.50446 | 1.0000 |
| O | O74  | 1.0 | 0.23122 | 0.18612 | 0.42261 | 1.0000 |
| O | O75  | 1.0 | 0.43985 | 0.13422 | 0.41671 | 1.0000 |
| O | O76  | 1.0 | 0.35432 | 0.49550 | 0.50142 | 1.0000 |
| O | O77  | 1.0 | 0.22612 | 0.46079 | 0.42271 | 1.0000 |
| O | O78  | 1.0 | 0.42550 | 0.53230 | 0.40988 | 1.0000 |
| O | O79  | 1.0 | 0.71576 | 0.35852 | 0.44272 | 1.0000 |
| O | O80  | 1.0 | 0.83228 | 0.19095 | 0.42069 | 1.0000 |
| O | O81  | 1.0 | 0.63429 | 0.20421 | 0.38798 | 1.0000 |
| O | O82  | 1.0 | 0.83883 | 0.53149 | 0.43477 | 1.0000 |
| O | O83  | 1.0 | 0.63853 | 0.54108 | 0.40989 | 1.0000 |
| O | O84  | 1.0 | 0.96213 | 0.35854 | 0.43789 | 1.0000 |
| O | O85  | 1.0 | 0.03154 | 0.18793 | 0.39113 | 1.0000 |
| O | O86  | 1.0 | 0.03626 | 0.54414 | 0.40541 | 1.0000 |
| O | O87  | 1.0 | 0.66682 | 0.36613 | 0.70062 | 1.0000 |
| O | O88  | 1.0 | 0.82617 | 0.32985 | 0.76379 | 1.0000 |
| O | O89  | 1.0 | 0.83736 | 0.25331 | 0.66960 | 1.0000 |
| O | O90  | 1.0 | 0.48554 | 0.30920 | 0.74592 | 1.0000 |
| O | O91  | 1.0 | 0.52811 | 0.23499 | 0.65384 | 1.0000 |
| O | O92  | 1.0 | 0.48276 | 0.44065 | 0.67048 | 1.0000 |
| O | O93  | 1.0 | 0.66375 | 0.71174 | 0.69068 | 1.0000 |
| O | O94  | 1.0 | 0.83419 | 0.84126 | 0.69701 | 1.0000 |
| O | O95  | 1.0 | 0.84484 | 0.65970 | 0.64490 | 1.0000 |
| O | O96  | 1.0 | 0.49427 | 0.83116 | 0.69821 | 1.0000 |
| O | O97  | 1.0 | 0.47840 | 0.64786 | 0.65019 | 1.0000 |
| O | O98  | 1.0 | 0.66282 | 0.96597 | 0.69109 | 1.0000 |
| O | O99  | 1.0 | 0.48218 | 0.00900 | 0.64538 | 1.0000 |
| O | O100 | 1.0 | 0.33270 | 0.63357 | 0.20080 | 1.0000 |
| O | O101 | 1.0 | 0.17380 | 0.66973 | 0.26440 | 1.0000 |
| O | O102 | 1.0 | 0.16221 | 0.74702 | 0.17044 | 1.0000 |

:

|    |      |     |         |         |         |        |
|----|------|-----|---------|---------|---------|--------|
| O  | O103 | 1.0 | 0.51437 | 0.68737 | 0.24632 | 1.0000 |
| O  | O104 | 1.0 | 0.47185 | 0.76617 | 0.15517 | 1.0000 |
| O  | O105 | 1.0 | 0.51631 | 0.55955 | 0.16937 | 1.0000 |
| O  | O106 | 1.0 | 0.33665 | 0.28819 | 0.19106 | 1.0000 |
| O  | O107 | 1.0 | 0.16566 | 0.15927 | 0.19764 | 1.0000 |
| O  | O108 | 1.0 | 0.15559 | 0.34023 | 0.14539 | 1.0000 |
| O  | O109 | 1.0 | 0.50662 | 0.16957 | 0.19792 | 1.0000 |
| O  | O110 | 1.0 | 0.52101 | 0.35202 | 0.14923 | 1.0000 |
| O  | O111 | 1.0 | 0.33728 | 0.03557 | 0.19057 | 1.0000 |
| O  | O112 | 1.0 | 0.51812 | 0.99184 | 0.14472 | 1.0000 |
| O  | O113 | 1.0 | 0.01653 | 0.82079 | 0.99013 | 1.0000 |
| O  | O114 | 1.0 | 0.01182 | 0.48304 | 0.00277 | 1.0000 |
| O  | O115 | 1.0 | 0.98456 | 0.17843 | 0.48960 | 1.0000 |
| O  | O116 | 1.0 | 0.98964 | 0.51830 | 0.50343 | 1.0000 |
| O  | O117 | 1.0 | 0.17487 | 0.97867 | 0.25202 | 1.0000 |
| O  | O118 | 1.0 | 0.50831 | 0.98650 | 0.24493 | 1.0000 |
| O  | O119 | 1.0 | 0.82621 | 0.02119 | 0.75203 | 1.0000 |
| O  | O120 | 1.0 | 0.49101 | 0.01400 | 0.74570 | 1.0000 |
| O  | O121 | 1.0 | 0.85846 | 0.46190 | 0.69031 | 1.0000 |
| O  | O122 | 1.0 | 0.47073 | 0.85784 | 0.05829 | 1.0000 |
| O  | O123 | 1.0 | 0.14055 | 0.53828 | 0.19069 | 1.0000 |
| O  | O124 | 1.0 | 0.84295 | 0.96684 | 0.85961 | 1.0000 |
| O  | O125 | 1.0 | 0.15034 | 0.97373 | 0.15216 | 1.0000 |
| O  | O126 | 1.0 | 0.84966 | 0.02673 | 0.65189 | 1.0000 |
| O  | O127 | 1.0 | 0.82054 | 0.17464 | 0.83258 | 1.0000 |
| O  | O128 | 1.0 | 0.17948 | 0.82596 | 0.33273 | 1.0000 |
| Al | Al1  | 1.0 | 0.46267 | 0.13354 | 0.62132 | 1.0000 |
| Al | Al2  | 1.0 | 0.86677 | 0.52937 | 0.62663 | 1.0000 |
| Al | Al3  | 1.0 | 0.53757 | 0.86613 | 0.12180 | 1.0000 |
| Al | Al4  | 1.0 | 0.13364 | 0.47030 | 0.12696 | 1.0000 |
| Al | Al5  | 1.0 | 0.15611 | 0.83751 | 0.12155 | 1.0000 |
| Al | Al6  | 1.0 | 0.84392 | 0.16237 | 0.62080 | 1.0000 |
| Al | Al7  | 1.0 | 0.77846 | 0.03495 | 0.81293 | 1.0000 |
| Al | Al8  | 1.0 | 0.22201 | 0.96539 | 0.31293 | 1.0000 |

:

|    |      |     |         |         |         |        |
|----|------|-----|---------|---------|---------|--------|
| Si | Si1  | 1.0 | 0.33635 | 0.54350 | 0.05944 | 1.0000 |
| Si | Si2  | 1.0 | 0.72272 | 0.79399 | 0.05555 | 1.0000 |
| Si | Si3  | 1.0 | 0.71046 | 0.53592 | 0.05306 | 1.0000 |
| Si | Si4  | 1.0 | 0.96619 | 0.78930 | 0.04539 | 1.0000 |
| Si | Si5  | 1.0 | 0.95378 | 0.53063 | 0.05322 | 1.0000 |
| Si | Si6  | 1.0 | 0.64786 | 0.20488 | 0.54451 | 1.0000 |
| Si | Si7  | 1.0 | 0.66382 | 0.45602 | 0.55949 | 1.0000 |
| Si | Si8  | 1.0 | 0.27818 | 0.20539 | 0.55512 | 1.0000 |
| Si | Si9  | 1.0 | 0.29076 | 0.46353 | 0.55346 | 1.0000 |
| Si | Si10 | 1.0 | 0.03472 | 0.21038 | 0.54480 | 1.0000 |
| Si | Si11 | 1.0 | 0.04749 | 0.46905 | 0.55340 | 1.0000 |
| Si | Si12 | 1.0 | 0.20832 | 0.34961 | 0.30385 | 1.0000 |
| Si | Si13 | 1.0 | 0.45797 | 0.35165 | 0.30615 | 1.0000 |
| Si | Si14 | 1.0 | 0.48639 | 0.72547 | 0.30286 | 1.0000 |
| Si | Si15 | 1.0 | 0.48319 | 0.96139 | 0.30386 | 1.0000 |
| Si | Si16 | 1.0 | 0.15025 | 0.51590 | 0.38118 | 1.0000 |
| Si | Si17 | 1.0 | 0.79365 | 0.65133 | 0.80368 | 1.0000 |
| Si | Si18 | 1.0 | 0.54398 | 0.65060 | 0.80686 | 1.0000 |
| Si | Si19 | 1.0 | 0.51388 | 0.27491 | 0.80283 | 1.0000 |
| Si | Si20 | 1.0 | 0.51707 | 0.03948 | 0.80454 | 1.0000 |
| Si | Si21 | 1.0 | 0.85107 | 0.48487 | 0.88049 | 1.0000 |
| Si | Si22 | 1.0 | 0.65085 | 0.79491 | 0.94514 | 1.0000 |
| Si | Si23 | 1.0 | 0.65268 | 0.54573 | 0.94319 | 1.0000 |
| Si | Si24 | 1.0 | 0.28760 | 0.76959 | 0.93493 | 1.0000 |
| Si | Si25 | 1.0 | 0.28091 | 0.51383 | 0.94865 | 1.0000 |
| Si | Si26 | 1.0 | 0.04735 | 0.77183 | 0.93557 | 1.0000 |
| Si | Si27 | 1.0 | 0.04425 | 0.51455 | 0.94560 | 1.0000 |
| Si | Si28 | 1.0 | 0.48021 | 0.84860 | 0.86990 | 1.0000 |
| Si | Si29 | 1.0 | 0.35050 | 0.20549 | 0.44470 | 1.0000 |
| Si | Si30 | 1.0 | 0.34866 | 0.45490 | 0.44357 | 1.0000 |
| Si | Si31 | 1.0 | 0.71349 | 0.23111 | 0.43437 | 1.0000 |
| Si | Si32 | 1.0 | 0.71946 | 0.48683 | 0.44874 | 1.0000 |
| Si | Si33 | 1.0 | 0.95362 | 0.22906 | 0.43551 | 1.0000 |
| Si | Si34 | 1.0 | 0.95650 | 0.48641 | 0.44641 | 1.0000 |

:

|    |      |     |         |         |         |        |
|----|------|-----|---------|---------|---------|--------|
| Si | Si35 | 1.0 | 0.52174 | 0.15308 | 0.36894 | 1.0000 |
| Si | Si36 | 1.0 | 0.53989 | 0.33452 | 0.69112 | 1.0000 |
| Si | Si37 | 1.0 | 0.79274 | 0.71657 | 0.69229 | 1.0000 |
| Si | Si38 | 1.0 | 0.53467 | 0.71034 | 0.69667 | 1.0000 |
| Si | Si39 | 1.0 | 0.53134 | 0.95630 | 0.69434 | 1.0000 |
| Si | Si40 | 1.0 | 0.45976 | 0.66496 | 0.19132 | 1.0000 |
| Si | Si41 | 1.0 | 0.20762 | 0.28378 | 0.19273 | 1.0000 |
| Si | Si42 | 1.0 | 0.46589 | 0.29027 | 0.19623 | 1.0000 |
| Si | Si43 | 1.0 | 0.46872 | 0.04468 | 0.19376 | 1.0000 |
| Si | Si44 | 1.0 | 0.52927 | 0.47108 | 0.12528 | 1.0000 |
| Si | Si45 | 1.0 | 0.47089 | 0.52863 | 0.62622 | 1.0000 |
| Si | Si46 | 1.0 | 0.15195 | 0.15737 | 0.37521 | 1.0000 |
| Si | Si47 | 1.0 | 0.53316 | 0.53690 | 0.37540 | 1.0000 |
| Si | Si48 | 1.0 | 0.46821 | 0.46476 | 0.87538 | 1.0000 |
| Si | Si49 | 1.0 | 0.79294 | 0.34479 | 0.70431 | 1.0000 |
| Si | Si50 | 1.0 | 0.35239 | 0.79468 | 0.04506 | 1.0000 |
| Si | Si51 | 1.0 | 0.20663 | 0.65514 | 0.20476 | 1.0000 |
| Si | Si52 | 1.0 | 0.84946 | 0.84378 | 0.87545 | 1.0000 |
| Si | Si53 | 1.0 | 0.21172 | 0.03944 | 0.20195 | 1.0000 |
| Si | Si54 | 1.0 | 0.78849 | 0.96123 | 0.70185 | 1.0000 |
| Si | Si55 | 1.0 | 0.76892 | 0.29437 | 0.81586 | 1.0000 |
| Si | Si56 | 1.0 | 0.23135 | 0.70607 | 0.31623 | 1.0000 |

AlSiAl-T1T2T7T7T7T7T9T9

data\_image0

\_chemical\_formula\_structural H8O128Al8Si56  
\_chemical\_formula\_sum "H8 O128 Al8 Si56"  
\_cell\_length\_a 12.5415  
\_cell\_length\_b 12.5208  
\_cell\_length\_c 26.5263  
\_cell\_angle\_alpha 89.9572  
\_cell\_angle\_beta 89.8301  
\_cell\_angle\_gamma 91.3952

\_space\_group\_name\_H-M\_alt "P 1"  
\_space\_group\_IT\_number 1

loop\_

\_space\_group\_symop\_operation\_xyz  
'x, y, z'

loop\_

\_atom\_site\_type\_symbol  
\_atom\_site\_label  
\_atom\_site\_symmetry\_multiplicity  
\_atom\_site\_fract\_x  
\_atom\_site\_fract\_y  
\_atom\_site\_fract\_z  
\_atom\_site\_occupancy  
H H1 1.0 0.47333 0.14445 0.53130 1.0000  
H H2 1.0 0.85905 0.51681 0.71688 1.0000  
H H3 1.0 0.52656 0.85204 0.02947 1.0000  
H H4 1.0 0.14077 0.48572 0.21821 1.0000  
H H5 1.0 0.07999 0.00820 0.14334 1.0000  
H H6 1.0 0.90889 0.98745 0.63767 1.0000  
H H7 1.0 0.87184 0.17559 0.86033 1.0000  
H H8 1.0 0.58412 0.84000 0.34626 1.0000

:

|   |     |     |         |         |         |        |
|---|-----|-----|---------|---------|---------|--------|
| O | O1  | 1.0 | 0.36951 | 0.66889 | 0.04863 | 1.0000 |
| O | O2  | 1.0 | 0.32602 | 0.82822 | 0.98640 | 1.0000 |
| O | O3  | 1.0 | 0.26904 | 0.84332 | 0.08441 | 1.0000 |
| O | O4  | 1.0 | 0.31195 | 0.48300 | 0.00618 | 1.0000 |
| O | O5  | 1.0 | 0.23284 | 0.53853 | 0.09551 | 1.0000 |
| O | O6  | 1.0 | 0.43777 | 0.48559 | 0.08361 | 1.0000 |
| O | O7  | 1.0 | 0.71550 | 0.66550 | 0.05920 | 1.0000 |
| O | O8  | 1.0 | 0.84555 | 0.83537 | 0.04740 | 1.0000 |
| O | O9  | 1.0 | 0.66786 | 0.84867 | 0.10317 | 1.0000 |
| O | O10 | 1.0 | 0.82923 | 0.49060 | 0.05221 | 1.0000 |
| O | O11 | 1.0 | 0.64643 | 0.48301 | 0.10089 | 1.0000 |
| O | O12 | 1.0 | 0.96171 | 0.66098 | 0.05102 | 1.0000 |
| O | O13 | 1.0 | 0.03789 | 0.84421 | 0.08945 | 1.0000 |
| O | O14 | 1.0 | 0.00814 | 0.48767 | 0.10395 | 1.0000 |
| O | O15 | 1.0 | 0.62657 | 0.33170 | 0.54813 | 1.0000 |
| O | O16 | 1.0 | 0.67335 | 0.17155 | 0.48662 | 1.0000 |
| O | O17 | 1.0 | 0.73050 | 0.16004 | 0.58430 | 1.0000 |
| O | O18 | 1.0 | 0.52973 | 0.14154 | 0.55789 | 1.0000 |
| O | O19 | 1.0 | 0.68605 | 0.51831 | 0.50611 | 1.0000 |
| O | O20 | 1.0 | 0.76646 | 0.45972 | 0.59470 | 1.0000 |
| O | O21 | 1.0 | 0.56234 | 0.51586 | 0.58419 | 1.0000 |
| O | O22 | 1.0 | 0.28485 | 0.33490 | 0.55991 | 1.0000 |
| O | O23 | 1.0 | 0.15518 | 0.16466 | 0.54869 | 1.0000 |
| O | O24 | 1.0 | 0.33267 | 0.15230 | 0.60414 | 1.0000 |
| O | O25 | 1.0 | 0.17248 | 0.51076 | 0.55250 | 1.0000 |
| O | O26 | 1.0 | 0.35376 | 0.51722 | 0.60136 | 1.0000 |
| O | O27 | 1.0 | 0.04082 | 0.34006 | 0.55109 | 1.0000 |
| O | O28 | 1.0 | 0.96138 | 0.15729 | 0.58905 | 1.0000 |
| O | O29 | 1.0 | 0.99092 | 0.51380 | 0.60264 | 1.0000 |
| O | O30 | 1.0 | 0.33739 | 0.38738 | 0.30956 | 1.0000 |
| O | O31 | 1.0 | 0.17322 | 0.35476 | 0.24530 | 1.0000 |
| O | O32 | 1.0 | 0.18996 | 0.23642 | 0.32770 | 1.0000 |
| O | O33 | 1.0 | 0.14174 | 0.44552 | 0.33220 | 1.0000 |
| O | O34 | 1.0 | 0.50065 | 0.34587 | 0.24903 | 1.0000 |

:

|   |     |     |         |         |         |        |
|---|-----|-----|---------|---------|---------|--------|
| O | O35 | 1.0 | 0.46497 | 0.22672 | 0.33115 | 1.0000 |
| O | O36 | 1.0 | 0.53670 | 0.42741 | 0.33881 | 1.0000 |
| O | O37 | 1.0 | 0.35544 | 0.72750 | 0.30937 | 1.0000 |
| O | O38 | 1.0 | 0.17974 | 0.83623 | 0.32657 | 1.0000 |
| O | O39 | 1.0 | 0.20141 | 0.64098 | 0.36317 | 1.0000 |
| O | O40 | 1.0 | 0.53634 | 0.63870 | 0.34250 | 1.0000 |
| O | O41 | 1.0 | 0.34272 | 0.97606 | 0.31656 | 1.0000 |
| O | O42 | 1.0 | 0.15307 | 0.03536 | 0.35160 | 1.0000 |
| O | O43 | 1.0 | 0.55180 | 0.03836 | 0.34691 | 1.0000 |
| O | O44 | 1.0 | 0.66890 | 0.61306 | 0.81006 | 1.0000 |
| O | O45 | 1.0 | 0.82897 | 0.64875 | 0.74412 | 1.0000 |
| O | O46 | 1.0 | 0.81381 | 0.76997 | 0.82618 | 1.0000 |
| O | O47 | 1.0 | 0.86623 | 0.56250 | 0.83213 | 1.0000 |
| O | O48 | 1.0 | 0.50350 | 0.64844 | 0.74948 | 1.0000 |
| O | O49 | 1.0 | 0.53863 | 0.77067 | 0.82998 | 1.0000 |
| O | O50 | 1.0 | 0.46904 | 0.56944 | 0.83979 | 1.0000 |
| O | O51 | 1.0 | 0.64490 | 0.27517 | 0.80962 | 1.0000 |
| O | O52 | 1.0 | 0.79956 | 0.36971 | 0.86306 | 1.0000 |
| O | O53 | 1.0 | 0.47002 | 0.15696 | 0.81717 | 1.0000 |
| O | O54 | 1.0 | 0.46517 | 0.35730 | 0.84284 | 1.0000 |
| O | O55 | 1.0 | 0.64290 | 0.03287 | 0.81597 | 1.0000 |
| O | O56 | 1.0 | 0.45217 | 0.95914 | 0.84284 | 1.0000 |
| O | O57 | 1.0 | 0.61410 | 0.66843 | 0.93920 | 1.0000 |
| O | O58 | 1.0 | 0.65117 | 0.82809 | 0.00479 | 1.0000 |
| O | O59 | 1.0 | 0.76921 | 0.81322 | 0.92225 | 1.0000 |
| O | O60 | 1.0 | 0.56077 | 0.86626 | 0.91810 | 1.0000 |
| O | O61 | 1.0 | 0.64764 | 0.50517 | 0.00187 | 1.0000 |
| O | O62 | 1.0 | 0.77460 | 0.53918 | 0.92255 | 1.0000 |
| O | O63 | 1.0 | 0.57521 | 0.46724 | 0.91075 | 1.0000 |
| O | O64 | 1.0 | 0.28448 | 0.64206 | 0.94300 | 1.0000 |
| O | O65 | 1.0 | 0.16784 | 0.80915 | 0.92010 | 1.0000 |
| O | O66 | 1.0 | 0.36720 | 0.79661 | 0.88882 | 1.0000 |
| O | O67 | 1.0 | 0.16178 | 0.46944 | 0.93466 | 1.0000 |
| O | O68 | 1.0 | 0.36230 | 0.45934 | 0.91018 | 1.0000 |

:

|   |      |     |         |         |         |        |
|---|------|-----|---------|---------|---------|--------|
| O | O69  | 1.0 | 0.03738 | 0.64215 | 0.93743 | 1.0000 |
| O | O70  | 1.0 | 0.96923 | 0.81444 | 0.89166 | 1.0000 |
| O | O71  | 1.0 | 0.96466 | 0.45611 | 0.90559 | 1.0000 |
| O | O72  | 1.0 | 0.37499 | 0.33021 | 0.43819 | 1.0000 |
| O | O73  | 1.0 | 0.34845 | 0.17163 | 0.50554 | 1.0000 |
| O | O74  | 1.0 | 0.23528 | 0.17023 | 0.42076 | 1.0000 |
| O | O75  | 1.0 | 0.44723 | 0.13732 | 0.42113 | 1.0000 |
| O | O76  | 1.0 | 0.35488 | 0.49381 | 0.50220 | 1.0000 |
| O | O77  | 1.0 | 0.22528 | 0.47195 | 0.42337 | 1.0000 |
| O | O78  | 1.0 | 0.42875 | 0.52814 | 0.41082 | 1.0000 |
| O | O79  | 1.0 | 0.72022 | 0.35803 | 0.44517 | 1.0000 |
| O | O80  | 1.0 | 0.83543 | 0.19073 | 0.42118 | 1.0000 |
| O | O81  | 1.0 | 0.63791 | 0.20809 | 0.38875 | 1.0000 |
| O | O82  | 1.0 | 0.84019 | 0.53165 | 0.43559 | 1.0000 |
| O | O83  | 1.0 | 0.64163 | 0.53861 | 0.40922 | 1.0000 |
| O | O84  | 1.0 | 0.96590 | 0.35883 | 0.43561 | 1.0000 |
| O | O85  | 1.0 | 0.03438 | 0.18312 | 0.39197 | 1.0000 |
| O | O86  | 1.0 | 0.03466 | 0.54719 | 0.40377 | 1.0000 |
| O | O87  | 1.0 | 0.66697 | 0.36692 | 0.70090 | 1.0000 |
| O | O88  | 1.0 | 0.82612 | 0.33091 | 0.76406 | 1.0000 |
| O | O89  | 1.0 | 0.83646 | 0.25233 | 0.67032 | 1.0000 |
| O | O90  | 1.0 | 0.48660 | 0.30918 | 0.74645 | 1.0000 |
| O | O91  | 1.0 | 0.52865 | 0.23573 | 0.65415 | 1.0000 |
| O | O92  | 1.0 | 0.48275 | 0.44112 | 0.67111 | 1.0000 |
| O | O93  | 1.0 | 0.66381 | 0.71242 | 0.69143 | 1.0000 |
| O | O94  | 1.0 | 0.83469 | 0.84060 | 0.69756 | 1.0000 |
| O | O95  | 1.0 | 0.84345 | 0.65968 | 0.64492 | 1.0000 |
| O | O96  | 1.0 | 0.49402 | 0.83125 | 0.69870 | 1.0000 |
| O | O97  | 1.0 | 0.47952 | 0.64813 | 0.65050 | 1.0000 |
| O | O98  | 1.0 | 0.66314 | 0.96489 | 0.69185 | 1.0000 |
| O | O99  | 1.0 | 0.48385 | 0.00943 | 0.64573 | 1.0000 |
| O | O100 | 1.0 | 0.33320 | 0.63530 | 0.20026 | 1.0000 |
| O | O101 | 1.0 | 0.17543 | 0.66930 | 0.26457 | 1.0000 |
| O | O102 | 1.0 | 0.16356 | 0.74882 | 0.17044 | 1.0000 |

:



|    |      |     |         |         |         |        |
|----|------|-----|---------|---------|---------|--------|
| O  | O103 | 1.0 | 0.51404 | 0.69161 | 0.24550 | 1.0000 |
| O  | O104 | 1.0 | 0.47318 | 0.76598 | 0.15351 | 1.0000 |
| O  | O105 | 1.0 | 0.51699 | 0.55948 | 0.17049 | 1.0000 |
| O  | O106 | 1.0 | 0.33605 | 0.28811 | 0.19200 | 1.0000 |
| O  | O107 | 1.0 | 0.16368 | 0.16138 | 0.20040 | 1.0000 |
| O  | O108 | 1.0 | 0.15486 | 0.34055 | 0.14647 | 1.0000 |
| O  | O109 | 1.0 | 0.50392 | 0.16611 | 0.19633 | 1.0000 |
| O  | O110 | 1.0 | 0.51939 | 0.35228 | 0.14989 | 1.0000 |
| O  | O111 | 1.0 | 0.33313 | 0.03516 | 0.18904 | 1.0000 |
| O  | O112 | 1.0 | 0.51019 | 0.99385 | 0.13938 | 1.0000 |
| O  | O113 | 1.0 | 0.01674 | 0.82123 | 0.99017 | 1.0000 |
| O  | O114 | 1.0 | 0.01123 | 0.48311 | 0.00355 | 1.0000 |
| O  | O115 | 1.0 | 0.98690 | 0.18096 | 0.49010 | 1.0000 |
| O  | O116 | 1.0 | 0.99322 | 0.51675 | 0.50224 | 1.0000 |
| O  | O117 | 1.0 | 0.17520 | 0.98253 | 0.25461 | 1.0000 |
| O  | O118 | 1.0 | 0.50435 | 0.97658 | 0.23984 | 1.0000 |
| O  | O119 | 1.0 | 0.82653 | 0.02115 | 0.75209 | 1.0000 |
| O  | O120 | 1.0 | 0.49132 | 0.01426 | 0.74610 | 1.0000 |
| O  | O121 | 1.0 | 0.85856 | 0.46155 | 0.68988 | 1.0000 |
| O  | O122 | 1.0 | 0.47037 | 0.85609 | 0.05630 | 1.0000 |
| O  | O123 | 1.0 | 0.14134 | 0.53992 | 0.19071 | 1.0000 |
| O  | O124 | 1.0 | 0.84301 | 0.96677 | 0.85959 | 1.0000 |
| O  | O125 | 1.0 | 0.14449 | 0.97392 | 0.15519 | 1.0000 |
| O  | O126 | 1.0 | 0.84912 | 0.02592 | 0.65201 | 1.0000 |
| O  | O127 | 1.0 | 0.82117 | 0.17438 | 0.83248 | 1.0000 |
| O  | O128 | 1.0 | 0.53207 | 0.83691 | 0.31907 | 1.0000 |
| Al | Al1  | 1.0 | 0.46339 | 0.13411 | 0.62185 | 1.0000 |
| Al | Al2  | 1.0 | 0.86567 | 0.52973 | 0.62618 | 1.0000 |
| Al | Al3  | 1.0 | 0.53611 | 0.86723 | 0.11962 | 1.0000 |
| Al | Al4  | 1.0 | 0.13299 | 0.47061 | 0.12761 | 1.0000 |
| Al | Al5  | 1.0 | 0.15637 | 0.83975 | 0.12178 | 1.0000 |
| Al | Al6  | 1.0 | 0.84281 | 0.16195 | 0.62136 | 1.0000 |
| Al | Al7  | 1.0 | 0.77857 | 0.03505 | 0.81292 | 1.0000 |
| Al | Al8  | 1.0 | 0.47658 | 0.97009 | 0.30279 | 1.0000 |

:

|    |      |     |         |         |         |        |
|----|------|-----|---------|---------|---------|--------|
| Si | Si1  | 1.0 | 0.33549 | 0.54386 | 0.05959 | 1.0000 |
| Si | Si2  | 1.0 | 0.72311 | 0.79489 | 0.05569 | 1.0000 |
| Si | Si3  | 1.0 | 0.71033 | 0.53674 | 0.05402 | 1.0000 |
| Si | Si4  | 1.0 | 0.96674 | 0.79010 | 0.04561 | 1.0000 |
| Si | Si5  | 1.0 | 0.95363 | 0.53126 | 0.05398 | 1.0000 |
| Si | Si6  | 1.0 | 0.64808 | 0.20473 | 0.54478 | 1.0000 |
| Si | Si7  | 1.0 | 0.66293 | 0.45610 | 0.55945 | 1.0000 |
| Si | Si8  | 1.0 | 0.27742 | 0.20554 | 0.55664 | 1.0000 |
| Si | Si9  | 1.0 | 0.29086 | 0.46356 | 0.55443 | 1.0000 |
| Si | Si10 | 1.0 | 0.03471 | 0.21105 | 0.54583 | 1.0000 |
| Si | Si11 | 1.0 | 0.04816 | 0.46977 | 0.55332 | 1.0000 |
| Si | Si12 | 1.0 | 0.21113 | 0.35461 | 0.30462 | 1.0000 |
| Si | Si13 | 1.0 | 0.46029 | 0.34558 | 0.30705 | 1.0000 |
| Si | Si14 | 1.0 | 0.22643 | 0.71914 | 0.31603 | 1.0000 |
| Si | Si15 | 1.0 | 0.21648 | 0.95900 | 0.31260 | 1.0000 |
| Si | Si16 | 1.0 | 0.15130 | 0.52630 | 0.38056 | 1.0000 |
| Si | Si17 | 1.0 | 0.79386 | 0.65099 | 0.80389 | 1.0000 |
| Si | Si18 | 1.0 | 0.54442 | 0.65058 | 0.80729 | 1.0000 |
| Si | Si19 | 1.0 | 0.51486 | 0.27506 | 0.80341 | 1.0000 |
| Si | Si20 | 1.0 | 0.51758 | 0.03954 | 0.80491 | 1.0000 |
| Si | Si21 | 1.0 | 0.85126 | 0.48429 | 0.88108 | 1.0000 |
| Si | Si22 | 1.0 | 0.65065 | 0.79422 | 0.94506 | 1.0000 |
| Si | Si23 | 1.0 | 0.65242 | 0.54497 | 0.94390 | 1.0000 |
| Si | Si24 | 1.0 | 0.28614 | 0.76952 | 0.93458 | 1.0000 |
| Si | Si25 | 1.0 | 0.28079 | 0.51366 | 0.94890 | 1.0000 |
| Si | Si26 | 1.0 | 0.04677 | 0.77169 | 0.93559 | 1.0000 |
| Si | Si27 | 1.0 | 0.04402 | 0.51438 | 0.94636 | 1.0000 |
| Si | Si28 | 1.0 | 0.47969 | 0.84832 | 0.87019 | 1.0000 |
| Si | Si29 | 1.0 | 0.34961 | 0.20261 | 0.44546 | 1.0000 |
| Si | Si30 | 1.0 | 0.34583 | 0.45579 | 0.44409 | 1.0000 |
| Si | Si31 | 1.0 | 0.71703 | 0.23103 | 0.43540 | 1.0000 |
| Si | Si32 | 1.0 | 0.72161 | 0.48644 | 0.44951 | 1.0000 |
| Si | Si33 | 1.0 | 0.95669 | 0.22916 | 0.43546 | 1.0000 |
| Si | Si34 | 1.0 | 0.95883 | 0.48676 | 0.44526 | 1.0000 |

:

|    |      |     |         |         |         |        |
|----|------|-----|---------|---------|---------|--------|
| Si | Si35 | 1.0 | 0.52636 | 0.15097 | 0.37192 | 1.0000 |
| Si | Si36 | 1.0 | 0.54034 | 0.33494 | 0.69155 | 1.0000 |
| Si | Si37 | 1.0 | 0.79258 | 0.71623 | 0.69265 | 1.0000 |
| Si | Si38 | 1.0 | 0.53490 | 0.71044 | 0.69714 | 1.0000 |
| Si | Si39 | 1.0 | 0.53184 | 0.95624 | 0.69486 | 1.0000 |
| Si | Si40 | 1.0 | 0.45930 | 0.66614 | 0.19023 | 1.0000 |
| Si | Si41 | 1.0 | 0.20730 | 0.28557 | 0.19411 | 1.0000 |
| Si | Si42 | 1.0 | 0.46530 | 0.28749 | 0.19636 | 1.0000 |
| Si | Si43 | 1.0 | 0.46581 | 0.04099 | 0.19093 | 1.0000 |
| Si | Si44 | 1.0 | 0.52882 | 0.47145 | 0.12602 | 1.0000 |
| Si | Si45 | 1.0 | 0.47075 | 0.52889 | 0.62666 | 1.0000 |
| Si | Si46 | 1.0 | 0.15353 | 0.15604 | 0.37346 | 1.0000 |
| Si | Si47 | 1.0 | 0.53509 | 0.52997 | 0.37596 | 1.0000 |
| Si | Si48 | 1.0 | 0.46829 | 0.46462 | 0.87603 | 1.0000 |
| Si | Si49 | 1.0 | 0.79282 | 0.34496 | 0.70453 | 1.0000 |
| Si | Si50 | 1.0 | 0.35033 | 0.79606 | 0.04466 | 1.0000 |
| Si | Si51 | 1.0 | 0.20689 | 0.65675 | 0.20526 | 1.0000 |
| Si | Si52 | 1.0 | 0.84910 | 0.84344 | 0.87519 | 1.0000 |
| Si | Si53 | 1.0 | 0.21002 | 0.04174 | 0.20290 | 1.0000 |
| Si | Si54 | 1.0 | 0.78872 | 0.96053 | 0.70222 | 1.0000 |
| Si | Si55 | 1.0 | 0.76952 | 0.29450 | 0.81619 | 1.0000 |
| Si | Si56 | 1.0 | 0.48133 | 0.71529 | 0.30257 | 1.0000 |

AlSiAl-T1T7T7T7T9T9T9

data\_image0

\_chemical\_formula\_structural H8O128Al8Si56  
\_chemical\_formula\_sum "H8 O128 Al8 Si56"  
\_cell\_length\_a 12.5573  
\_cell\_length\_b 12.5215  
\_cell\_length\_c 26.5356  
\_cell\_angle\_alpha 90.0583  
\_cell\_angle\_beta 89.9419  
\_cell\_angle\_gamma 91.3805

\_space\_group\_name\_H-M\_alt "P 1"  
\_space\_group\_IT\_number 1

loop\_

\_space\_group\_symop\_operation\_xyz  
'x, y, z'

loop\_

\_atom\_site\_type\_symbol  
\_atom\_site\_label  
\_atom\_site\_symmetry\_multiplicity  
\_atom\_site\_fract\_x  
\_atom\_site\_fract\_y  
\_atom\_site\_fract\_z  
\_atom\_site\_occupancy

|   |    |     |         |         |         |        |
|---|----|-----|---------|---------|---------|--------|
| H | H1 | 1.0 | 0.47211 | 0.14530 | 0.53333 | 1.0000 |
| H | H2 | 1.0 | 0.86099 | 0.51571 | 0.71706 | 1.0000 |
| H | H3 | 1.0 | 0.52669 | 0.85550 | 0.03146 | 1.0000 |
| H | H4 | 1.0 | 0.14287 | 0.47965 | 0.21532 | 1.0000 |
| H | H5 | 1.0 | 0.08228 | 0.00640 | 0.14142 | 1.0000 |
| H | H6 | 1.0 | 0.90943 | 0.98806 | 0.63816 | 1.0000 |
| H | H7 | 1.0 | 0.87197 | 0.17618 | 0.86012 | 1.0000 |
| H | H8 | 1.0 | 0.09283 | 0.98271 | 0.36746 | 1.0000 |

:

|   |     |     |         |         |         |        |
|---|-----|-----|---------|---------|---------|--------|
| O | O1  | 1.0 | 0.37384 | 0.66939 | 0.04884 | 1.0000 |
| O | O2  | 1.0 | 0.32854 | 0.82898 | 0.98721 | 1.0000 |
| O | O3  | 1.0 | 0.26910 | 0.84126 | 0.08483 | 1.0000 |
| O | O4  | 1.0 | 0.31589 | 0.48372 | 0.00554 | 1.0000 |
| O | O5  | 1.0 | 0.23253 | 0.54105 | 0.09347 | 1.0000 |
| O | O6  | 1.0 | 0.43724 | 0.48486 | 0.08445 | 1.0000 |
| O | O7  | 1.0 | 0.71611 | 0.66399 | 0.05827 | 1.0000 |
| O | O8  | 1.0 | 0.84574 | 0.83395 | 0.04780 | 1.0000 |
| O | O9  | 1.0 | 0.66879 | 0.84507 | 0.10386 | 1.0000 |
| O | O10 | 1.0 | 0.82919 | 0.48873 | 0.05237 | 1.0000 |
| O | O11 | 1.0 | 0.64635 | 0.48289 | 0.10063 | 1.0000 |
| O | O12 | 1.0 | 0.96156 | 0.65932 | 0.05179 | 1.0000 |
| O | O13 | 1.0 | 0.03760 | 0.84249 | 0.09021 | 1.0000 |
| O | O14 | 1.0 | 0.00930 | 0.48345 | 0.10255 | 1.0000 |
| O | O15 | 1.0 | 0.62573 | 0.33118 | 0.54974 | 1.0000 |
| O | O16 | 1.0 | 0.66085 | 0.17287 | 0.48582 | 1.0000 |
| O | O17 | 1.0 | 0.73447 | 0.15930 | 0.58146 | 1.0000 |
| O | O18 | 1.0 | 0.52945 | 0.14088 | 0.55987 | 1.0000 |
| O | O19 | 1.0 | 0.68811 | 0.51414 | 0.50559 | 1.0000 |
| O | O20 | 1.0 | 0.76488 | 0.46091 | 0.59547 | 1.0000 |
| O | O21 | 1.0 | 0.56166 | 0.51773 | 0.58271 | 1.0000 |
| O | O22 | 1.0 | 0.28534 | 0.33786 | 0.55850 | 1.0000 |
| O | O23 | 1.0 | 0.15861 | 0.16513 | 0.54818 | 1.0000 |
| O | O24 | 1.0 | 0.33350 | 0.15827 | 0.60564 | 1.0000 |
| O | O25 | 1.0 | 0.17019 | 0.51156 | 0.55208 | 1.0000 |
| O | O26 | 1.0 | 0.35307 | 0.52001 | 0.60022 | 1.0000 |
| O | O27 | 1.0 | 0.04160 | 0.33798 | 0.55082 | 1.0000 |
| O | O28 | 1.0 | 0.96566 | 0.15617 | 0.59037 | 1.0000 |
| O | O29 | 1.0 | 0.99011 | 0.51140 | 0.60255 | 1.0000 |
| O | O30 | 1.0 | 0.33649 | 0.39394 | 0.30620 | 1.0000 |
| O | O31 | 1.0 | 0.17425 | 0.35825 | 0.24131 | 1.0000 |
| O | O32 | 1.0 | 0.19540 | 0.23213 | 0.32036 | 1.0000 |
| O | O33 | 1.0 | 0.13928 | 0.43938 | 0.33045 | 1.0000 |
| O | O34 | 1.0 | 0.50266 | 0.34914 | 0.24842 | 1.0000 |

:

|   |     |     |         |         |         |        |
|---|-----|-----|---------|---------|---------|--------|
| O | O35 | 1.0 | 0.46284 | 0.23543 | 0.33121 | 1.0000 |
| O | O36 | 1.0 | 0.53545 | 0.43604 | 0.33734 | 1.0000 |
| O | O37 | 1.0 | 0.35190 | 0.71530 | 0.30901 | 1.0000 |
| O | O38 | 1.0 | 0.18025 | 0.82910 | 0.32318 | 1.0000 |
| O | O39 | 1.0 | 0.19322 | 0.63588 | 0.36284 | 1.0000 |
| O | O40 | 1.0 | 0.51635 | 0.84432 | 0.31749 | 1.0000 |
| O | O41 | 1.0 | 0.53770 | 0.64722 | 0.34330 | 1.0000 |
| O | O42 | 1.0 | 0.34484 | 0.97273 | 0.31776 | 1.0000 |
| O | O43 | 1.0 | 0.53729 | 0.04291 | 0.34170 | 1.0000 |
| O | O44 | 1.0 | 0.66941 | 0.61462 | 0.81040 | 1.0000 |
| O | O45 | 1.0 | 0.82899 | 0.65017 | 0.74433 | 1.0000 |
| O | O46 | 1.0 | 0.81481 | 0.77037 | 0.82697 | 1.0000 |
| O | O47 | 1.0 | 0.86653 | 0.56301 | 0.83183 | 1.0000 |
| O | O48 | 1.0 | 0.50492 | 0.64832 | 0.74920 | 1.0000 |
| O | O49 | 1.0 | 0.53736 | 0.77102 | 0.83002 | 1.0000 |
| O | O50 | 1.0 | 0.46969 | 0.56938 | 0.83915 | 1.0000 |
| O | O51 | 1.0 | 0.64536 | 0.27552 | 0.80915 | 1.0000 |
| O | O52 | 1.0 | 0.80046 | 0.36993 | 0.86226 | 1.0000 |
| O | O53 | 1.0 | 0.47050 | 0.15787 | 0.81592 | 1.0000 |
| O | O54 | 1.0 | 0.46580 | 0.35665 | 0.84337 | 1.0000 |
| O | O55 | 1.0 | 0.64326 | 0.03348 | 0.81658 | 1.0000 |
| O | O56 | 1.0 | 0.45296 | 0.96056 | 0.84355 | 1.0000 |
| O | O57 | 1.0 | 0.61640 | 0.66877 | 0.93955 | 1.0000 |
| O | O58 | 1.0 | 0.65115 | 0.82862 | 0.00531 | 1.0000 |
| O | O59 | 1.0 | 0.76983 | 0.81523 | 0.92285 | 1.0000 |
| O | O60 | 1.0 | 0.56119 | 0.86612 | 0.91832 | 1.0000 |
| O | O61 | 1.0 | 0.64846 | 0.50354 | 0.00137 | 1.0000 |
| O | O62 | 1.0 | 0.77552 | 0.53833 | 0.92226 | 1.0000 |
| O | O63 | 1.0 | 0.57535 | 0.46843 | 0.91047 | 1.0000 |
| O | O64 | 1.0 | 0.28420 | 0.64343 | 0.94372 | 1.0000 |
| O | O65 | 1.0 | 0.16857 | 0.81098 | 0.92149 | 1.0000 |
| O | O66 | 1.0 | 0.36727 | 0.79799 | 0.88943 | 1.0000 |
| O | O67 | 1.0 | 0.16270 | 0.46990 | 0.93514 | 1.0000 |
| O | O68 | 1.0 | 0.36214 | 0.46166 | 0.90926 | 1.0000 |

:

|   |      |     |         |         |         |        |
|---|------|-----|---------|---------|---------|--------|
| O | O69  | 1.0 | 0.03889 | 0.64272 | 0.93699 | 1.0000 |
| O | O70  | 1.0 | 0.96980 | 0.81617 | 0.89265 | 1.0000 |
| O | O71  | 1.0 | 0.96613 | 0.45676 | 0.90449 | 1.0000 |
| O | O72  | 1.0 | 0.38610 | 0.33335 | 0.44035 | 1.0000 |
| O | O73  | 1.0 | 0.35537 | 0.17379 | 0.50723 | 1.0000 |
| O | O74  | 1.0 | 0.23787 | 0.17894 | 0.42420 | 1.0000 |
| O | O75  | 1.0 | 0.44596 | 0.13779 | 0.42008 | 1.0000 |
| O | O76  | 1.0 | 0.35117 | 0.49917 | 0.50101 | 1.0000 |
| O | O77  | 1.0 | 0.22791 | 0.46418 | 0.42069 | 1.0000 |
| O | O78  | 1.0 | 0.42775 | 0.53260 | 0.41003 | 1.0000 |
| O | O79  | 1.0 | 0.71014 | 0.35603 | 0.44120 | 1.0000 |
| O | O80  | 1.0 | 0.82861 | 0.18502 | 0.42531 | 1.0000 |
| O | O81  | 1.0 | 0.63818 | 0.19815 | 0.38619 | 1.0000 |
| O | O82  | 1.0 | 0.83892 | 0.52454 | 0.43424 | 1.0000 |
| O | O83  | 1.0 | 0.64021 | 0.54241 | 0.40963 | 1.0000 |
| O | O84  | 1.0 | 0.96218 | 0.35081 | 0.43736 | 1.0000 |
| O | O85  | 1.0 | 0.02216 | 0.17175 | 0.39159 | 1.0000 |
| O | O86  | 1.0 | 0.03398 | 0.53643 | 0.40405 | 1.0000 |
| O | O87  | 1.0 | 0.66733 | 0.36993 | 0.70104 | 1.0000 |
| O | O88  | 1.0 | 0.82652 | 0.32954 | 0.76328 | 1.0000 |
| O | O89  | 1.0 | 0.83417 | 0.25257 | 0.66905 | 1.0000 |
| O | O90  | 1.0 | 0.48690 | 0.31415 | 0.74662 | 1.0000 |
| O | O91  | 1.0 | 0.53210 | 0.23293 | 0.65630 | 1.0000 |
| O | O92  | 1.0 | 0.48253 | 0.43925 | 0.66875 | 1.0000 |
| O | O93  | 1.0 | 0.66447 | 0.71150 | 0.69074 | 1.0000 |
| O | O94  | 1.0 | 0.83382 | 0.84130 | 0.69730 | 1.0000 |
| O | O95  | 1.0 | 0.84542 | 0.65983 | 0.64525 | 1.0000 |
| O | O96  | 1.0 | 0.49485 | 0.83042 | 0.69845 | 1.0000 |
| O | O97  | 1.0 | 0.47962 | 0.64741 | 0.65038 | 1.0000 |
| O | O98  | 1.0 | 0.66230 | 0.96575 | 0.69101 | 1.0000 |
| O | O99  | 1.0 | 0.48022 | 0.00882 | 0.64640 | 1.0000 |
| O | O100 | 1.0 | 0.33272 | 0.63102 | 0.19966 | 1.0000 |
| O | O101 | 1.0 | 0.17202 | 0.66086 | 0.26331 | 1.0000 |
| O | O102 | 1.0 | 0.16396 | 0.74673 | 0.17098 | 1.0000 |

:

|    |      |     |         |         |         |        |
|----|------|-----|---------|---------|---------|--------|
| O  | O103 | 1.0 | 0.51224 | 0.69123 | 0.24636 | 1.0000 |
| O  | O104 | 1.0 | 0.47194 | 0.76226 | 0.15392 | 1.0000 |
| O  | O105 | 1.0 | 0.51812 | 0.55717 | 0.17144 | 1.0000 |
| O  | O106 | 1.0 | 0.33866 | 0.28459 | 0.19170 | 1.0000 |
| O  | O107 | 1.0 | 0.16449 | 0.16171 | 0.19834 | 1.0000 |
| O  | O108 | 1.0 | 0.16194 | 0.33840 | 0.14237 | 1.0000 |
| O  | O109 | 1.0 | 0.50719 | 0.16684 | 0.19758 | 1.0000 |
| O  | O110 | 1.0 | 0.52108 | 0.35056 | 0.14921 | 1.0000 |
| O  | O111 | 1.0 | 0.33492 | 0.03635 | 0.18689 | 1.0000 |
| O  | O112 | 1.0 | 0.51945 | 0.98756 | 0.14624 | 1.0000 |
| O  | O113 | 1.0 | 0.01730 | 0.81976 | 0.99110 | 1.0000 |
| O  | O114 | 1.0 | 0.00960 | 0.48310 | 0.00243 | 1.0000 |
| O  | O115 | 1.0 | 0.98659 | 0.17473 | 0.49125 | 1.0000 |
| O  | O116 | 1.0 | 0.98980 | 0.51296 | 0.50220 | 1.0000 |
| O  | O117 | 1.0 | 0.18175 | 0.98378 | 0.25336 | 1.0000 |
| O  | O118 | 1.0 | 0.49288 | 0.98468 | 0.24610 | 1.0000 |
| O  | O119 | 1.0 | 0.82523 | 0.02124 | 0.75187 | 1.0000 |
| O  | O120 | 1.0 | 0.49194 | 0.01217 | 0.74658 | 1.0000 |
| O  | O121 | 1.0 | 0.85978 | 0.46110 | 0.68985 | 1.0000 |
| O  | O122 | 1.0 | 0.47076 | 0.85867 | 0.05838 | 1.0000 |
| O  | O123 | 1.0 | 0.14146 | 0.53577 | 0.18830 | 1.0000 |
| O  | O124 | 1.0 | 0.84365 | 0.96757 | 0.85968 | 1.0000 |
| O  | O125 | 1.0 | 0.14545 | 0.97210 | 0.15479 | 1.0000 |
| O  | O126 | 1.0 | 0.84862 | 0.02614 | 0.65168 | 1.0000 |
| O  | O127 | 1.0 | 0.82174 | 0.17455 | 0.83209 | 1.0000 |
| O  | O128 | 1.0 | 0.15243 | 0.02214 | 0.35191 | 1.0000 |
| Al | Al1  | 1.0 | 0.46323 | 0.13471 | 0.62318 | 1.0000 |
| Al | Al2  | 1.0 | 0.86576 | 0.52964 | 0.62623 | 1.0000 |
| Al | Al3  | 1.0 | 0.53821 | 0.86295 | 0.12168 | 1.0000 |
| Al | Al4  | 1.0 | 0.13524 | 0.46873 | 0.12510 | 1.0000 |
| Al | Al5  | 1.0 | 0.15655 | 0.83581 | 0.12182 | 1.0000 |
| Al | Al6  | 1.0 | 0.84438 | 0.16183 | 0.62025 | 1.0000 |
| Al | Al7  | 1.0 | 0.77872 | 0.03512 | 0.81285 | 1.0000 |
| Al | Al8  | 1.0 | 0.15292 | 0.16660 | 0.37414 | 1.0000 |

:



|    |      |     |         |         |         |        |
|----|------|-----|---------|---------|---------|--------|
| Si | Si1  | 1.0 | 0.33747 | 0.54464 | 0.05913 | 1.0000 |
| Si | Si2  | 1.0 | 0.72341 | 0.79330 | 0.05569 | 1.0000 |
| Si | Si3  | 1.0 | 0.71054 | 0.53519 | 0.05365 | 1.0000 |
| Si | Si4  | 1.0 | 0.96660 | 0.78835 | 0.04615 | 1.0000 |
| Si | Si5  | 1.0 | 0.95341 | 0.52944 | 0.05345 | 1.0000 |
| Si | Si6  | 1.0 | 0.64606 | 0.20423 | 0.54496 | 1.0000 |
| Si | Si7  | 1.0 | 0.66263 | 0.45591 | 0.55943 | 1.0000 |
| Si | Si8  | 1.0 | 0.27992 | 0.20833 | 0.55688 | 1.0000 |
| Si | Si9  | 1.0 | 0.28940 | 0.46654 | 0.55334 | 1.0000 |
| Si | Si10 | 1.0 | 0.03688 | 0.20870 | 0.54596 | 1.0000 |
| Si | Si11 | 1.0 | 0.04689 | 0.46768 | 0.55309 | 1.0000 |
| Si | Si12 | 1.0 | 0.21202 | 0.35271 | 0.30120 | 1.0000 |
| Si | Si13 | 1.0 | 0.45957 | 0.35361 | 0.30608 | 1.0000 |
| Si | Si14 | 1.0 | 0.22489 | 0.70776 | 0.31481 | 1.0000 |
| Si | Si15 | 1.0 | 0.48047 | 0.72274 | 0.30339 | 1.0000 |
| Si | Si16 | 1.0 | 0.47335 | 0.96176 | 0.30514 | 1.0000 |
| Si | Si17 | 1.0 | 0.14938 | 0.51774 | 0.37967 | 1.0000 |
| Si | Si18 | 1.0 | 0.79424 | 0.65202 | 0.80397 | 1.0000 |
| Si | Si19 | 1.0 | 0.54485 | 0.65111 | 0.80710 | 1.0000 |
| Si | Si20 | 1.0 | 0.51543 | 0.27628 | 0.80298 | 1.0000 |
| Si | Si21 | 1.0 | 0.51818 | 0.03987 | 0.80506 | 1.0000 |
| Si | Si22 | 1.0 | 0.85204 | 0.48436 | 0.88047 | 1.0000 |
| Si | Si23 | 1.0 | 0.65145 | 0.79491 | 0.94538 | 1.0000 |
| Si | Si24 | 1.0 | 0.65364 | 0.54491 | 0.94364 | 1.0000 |
| Si | Si25 | 1.0 | 0.28699 | 0.77088 | 0.93534 | 1.0000 |
| Si | Si26 | 1.0 | 0.28174 | 0.51480 | 0.94869 | 1.0000 |
| Si | Si27 | 1.0 | 0.04760 | 0.77230 | 0.93614 | 1.0000 |
| Si | Si28 | 1.0 | 0.04464 | 0.51485 | 0.94570 | 1.0000 |
| Si | Si29 | 1.0 | 0.47972 | 0.84908 | 0.87043 | 1.0000 |
| Si | Si30 | 1.0 | 0.35263 | 0.20654 | 0.44703 | 1.0000 |
| Si | Si31 | 1.0 | 0.34835 | 0.45699 | 0.44335 | 1.0000 |
| Si | Si32 | 1.0 | 0.71034 | 0.22810 | 0.43499 | 1.0000 |
| Si | Si33 | 1.0 | 0.71904 | 0.48406 | 0.44820 | 1.0000 |
| Si | Si34 | 1.0 | 0.95214 | 0.22061 | 0.43641 | 1.0000 |

:

|    |      |     |         |         |         |        |
|----|------|-----|---------|---------|---------|--------|
| Si | Si35 | 1.0 | 0.95640 | 0.47883 | 0.44548 | 1.0000 |
| Si | Si36 | 1.0 | 0.52077 | 0.15547 | 0.37046 | 1.0000 |
| Si | Si37 | 1.0 | 0.54130 | 0.33602 | 0.69148 | 1.0000 |
| Si | Si38 | 1.0 | 0.79308 | 0.71651 | 0.69252 | 1.0000 |
| Si | Si39 | 1.0 | 0.53583 | 0.70977 | 0.69673 | 1.0000 |
| Si | Si40 | 1.0 | 0.53122 | 0.95567 | 0.69479 | 1.0000 |
| Si | Si41 | 1.0 | 0.45926 | 0.66329 | 0.19153 | 1.0000 |
| Si | Si42 | 1.0 | 0.21007 | 0.28594 | 0.19164 | 1.0000 |
| Si | Si43 | 1.0 | 0.46770 | 0.28861 | 0.19651 | 1.0000 |
| Si | Si44 | 1.0 | 0.46609 | 0.04354 | 0.19311 | 1.0000 |
| Si | Si45 | 1.0 | 0.52958 | 0.47082 | 0.12625 | 1.0000 |
| Si | Si46 | 1.0 | 0.47039 | 0.52928 | 0.62534 | 1.0000 |
| Si | Si47 | 1.0 | 0.53468 | 0.53803 | 0.37549 | 1.0000 |
| Si | Si48 | 1.0 | 0.46863 | 0.46524 | 0.87564 | 1.0000 |
| Si | Si49 | 1.0 | 0.79263 | 0.34512 | 0.70386 | 1.0000 |
| Si | Si50 | 1.0 | 0.35217 | 0.79611 | 0.04539 | 1.0000 |
| Si | Si51 | 1.0 | 0.20650 | 0.65138 | 0.20418 | 1.0000 |
| Si | Si52 | 1.0 | 0.84977 | 0.84457 | 0.87575 | 1.0000 |
| Si | Si53 | 1.0 | 0.21181 | 0.04329 | 0.20055 | 1.0000 |
| Si | Si54 | 1.0 | 0.78770 | 0.96124 | 0.70170 | 1.0000 |
| Si | Si55 | 1.0 | 0.77003 | 0.29435 | 0.81545 | 1.0000 |
| Si | Si56 | 1.0 | 0.22029 | 0.94873 | 0.30920 | 1.0000 |

AlSiAl-T2T7T7T7T9T9T9

data\_image0

\_chemical\_formula\_structural H8O128Al8Si56  
\_chemical\_formula\_sum "H8 O128 Al8 Si56"  
\_cell\_length\_a 12.5727  
\_cell\_length\_b 12.5075  
\_cell\_length\_c 26.5415  
\_cell\_angle\_alpha 89.4286  
\_cell\_angle\_beta 89.9952  
\_cell\_angle\_gamma 91.2207

\_space\_group\_name\_H-M\_alt "P 1"  
\_space\_group\_IT\_number 1

loop\_

\_space\_group\_symop\_operation\_xyz  
'x, y, z'

loop\_

\_atom\_site\_type\_symbol  
\_atom\_site\_label  
\_atom\_site\_symmetry\_multiplicity  
\_atom\_site\_fract\_x  
\_atom\_site\_fract\_y  
\_atom\_site\_fract\_z  
\_atom\_site\_occupancy  
H H1 1.0 0.47117 0.14888 0.53438 1.0000  
H H2 1.0 0.86253 0.51477 0.71723 1.0000  
H H3 1.0 0.52452 0.85384 0.02848 1.0000  
H H4 1.0 0.14414 0.48167 0.21563 1.0000  
H H5 1.0 0.08039 0.01013 0.13961 1.0000  
H H6 1.0 0.91629 0.99295 0.64420 1.0000  
H H7 1.0 0.57565 0.83939 0.34803 1.0000  
H H8 1.0 0.07507 0.98914 0.36094 1.0000

:

|   |     |     |         |         |         |        |
|---|-----|-----|---------|---------|---------|--------|
| O | O1  | 1.0 | 0.37194 | 0.67127 | 0.04734 | 1.0000 |
| O | O2  | 1.0 | 0.32400 | 0.83068 | 0.98494 | 1.0000 |
| O | O3  | 1.0 | 0.26760 | 0.84340 | 0.08296 | 1.0000 |
| O | O4  | 1.0 | 0.31516 | 0.48504 | 0.00606 | 1.0000 |
| O | O5  | 1.0 | 0.23232 | 0.54393 | 0.09368 | 1.0000 |
| O | O6  | 1.0 | 0.43680 | 0.48754 | 0.08510 | 1.0000 |
| O | O7  | 1.0 | 0.71505 | 0.66244 | 0.05942 | 1.0000 |
| O | O8  | 1.0 | 0.84335 | 0.83362 | 0.04684 | 1.0000 |
| O | O9  | 1.0 | 0.66582 | 0.84647 | 0.10178 | 1.0000 |
| O | O10 | 1.0 | 0.82906 | 0.48811 | 0.05342 | 1.0000 |
| O | O11 | 1.0 | 0.64569 | 0.48065 | 0.10146 | 1.0000 |
| O | O12 | 1.0 | 0.95987 | 0.66005 | 0.05186 | 1.0000 |
| O | O13 | 1.0 | 0.03631 | 0.84374 | 0.08866 | 1.0000 |
| O | O14 | 1.0 | 0.00948 | 0.48450 | 0.10323 | 1.0000 |
| O | O15 | 1.0 | 0.62761 | 0.33347 | 0.55053 | 1.0000 |
| O | O16 | 1.0 | 0.66582 | 0.17341 | 0.48848 | 1.0000 |
| O | O17 | 1.0 | 0.73168 | 0.15890 | 0.58503 | 1.0000 |
| O | O18 | 1.0 | 0.52865 | 0.14462 | 0.56090 | 1.0000 |
| O | O19 | 1.0 | 0.68677 | 0.51868 | 0.50554 | 1.0000 |
| O | O20 | 1.0 | 0.76568 | 0.46404 | 0.59513 | 1.0000 |
| O | O21 | 1.0 | 0.56192 | 0.51998 | 0.58279 | 1.0000 |
| O | O22 | 1.0 | 0.28505 | 0.33771 | 0.56096 | 1.0000 |
| O | O23 | 1.0 | 0.15659 | 0.16665 | 0.55113 | 1.0000 |
| O | O24 | 1.0 | 0.33241 | 0.15698 | 0.60793 | 1.0000 |
| O | O25 | 1.0 | 0.17058 | 0.51204 | 0.55285 | 1.0000 |
| O | O26 | 1.0 | 0.35367 | 0.52171 | 0.60026 | 1.0000 |
| O | O27 | 1.0 | 0.03951 | 0.34029 | 0.55310 | 1.0000 |
| O | O28 | 1.0 | 0.96317 | 0.15655 | 0.59184 | 1.0000 |
| O | O29 | 1.0 | 0.98961 | 0.51666 | 0.60197 | 1.0000 |
| O | O30 | 1.0 | 0.33771 | 0.39150 | 0.30684 | 1.0000 |
| O | O31 | 1.0 | 0.17388 | 0.35937 | 0.24204 | 1.0000 |
| O | O32 | 1.0 | 0.19425 | 0.23343 | 0.32192 | 1.0000 |
| O | O33 | 1.0 | 0.14131 | 0.44187 | 0.33054 | 1.0000 |
| O | O34 | 1.0 | 0.50380 | 0.34109 | 0.25056 | 1.0000 |

:

|   |     |     |         |         |         |        |
|---|-----|-----|---------|---------|---------|--------|
| O | O35 | 1.0 | 0.46065 | 0.22873 | 0.33446 | 1.0000 |
| O | O36 | 1.0 | 0.53586 | 0.42838 | 0.33884 | 1.0000 |
| O | O37 | 1.0 | 0.35187 | 0.72771 | 0.30802 | 1.0000 |
| O | O38 | 1.0 | 0.17440 | 0.83023 | 0.32289 | 1.0000 |
| O | O39 | 1.0 | 0.19903 | 0.63645 | 0.36218 | 1.0000 |
| O | O40 | 1.0 | 0.53289 | 0.63942 | 0.34236 | 1.0000 |
| O | O41 | 1.0 | 0.33596 | 0.97783 | 0.31870 | 1.0000 |
| O | O42 | 1.0 | 0.54551 | 0.03909 | 0.34784 | 1.0000 |
| O | O43 | 1.0 | 0.66659 | 0.61204 | 0.81052 | 1.0000 |
| O | O44 | 1.0 | 0.82730 | 0.64448 | 0.74463 | 1.0000 |
| O | O45 | 1.0 | 0.81468 | 0.76350 | 0.82614 | 1.0000 |
| O | O46 | 1.0 | 0.86249 | 0.55438 | 0.83214 | 1.0000 |
| O | O47 | 1.0 | 0.50297 | 0.64515 | 0.74895 | 1.0000 |
| O | O48 | 1.0 | 0.53318 | 0.76819 | 0.82896 | 1.0000 |
| O | O49 | 1.0 | 0.46802 | 0.56632 | 0.83980 | 1.0000 |
| O | O50 | 1.0 | 0.64621 | 0.28624 | 0.81045 | 1.0000 |
| O | O51 | 1.0 | 0.81371 | 0.16336 | 0.82649 | 1.0000 |
| O | O52 | 1.0 | 0.80715 | 0.35707 | 0.86367 | 1.0000 |
| O | O53 | 1.0 | 0.47997 | 0.15762 | 0.81667 | 1.0000 |
| O | O54 | 1.0 | 0.46084 | 0.35371 | 0.84433 | 1.0000 |
| O | O55 | 1.0 | 0.64973 | 0.02694 | 0.81472 | 1.0000 |
| O | O56 | 1.0 | 0.45850 | 0.96059 | 0.84307 | 1.0000 |
| O | O57 | 1.0 | 0.61941 | 0.66305 | 0.93786 | 1.0000 |
| O | O58 | 1.0 | 0.64967 | 0.82355 | 0.00378 | 1.0000 |
| O | O59 | 1.0 | 0.76545 | 0.81641 | 0.92050 | 1.0000 |
| O | O60 | 1.0 | 0.55592 | 0.85872 | 0.91812 | 1.0000 |
| O | O61 | 1.0 | 0.64798 | 0.50159 | 0.00241 | 1.0000 |
| O | O62 | 1.0 | 0.77402 | 0.52656 | 0.92231 | 1.0000 |
| O | O63 | 1.0 | 0.57204 | 0.46302 | 0.91194 | 1.0000 |
| O | O64 | 1.0 | 0.28477 | 0.64438 | 0.94234 | 1.0000 |
| O | O65 | 1.0 | 0.16399 | 0.81020 | 0.91961 | 1.0000 |
| O | O66 | 1.0 | 0.36106 | 0.80107 | 0.88678 | 1.0000 |
| O | O67 | 1.0 | 0.16125 | 0.47327 | 0.93613 | 1.0000 |
| O | O68 | 1.0 | 0.35961 | 0.45979 | 0.91017 | 1.0000 |

:

|   |      |     |         |         |         |        |
|---|------|-----|---------|---------|---------|--------|
| O | O69  | 1.0 | 0.03231 | 0.64372 | 0.93530 | 1.0000 |
| O | O70  | 1.0 | 0.96577 | 0.82221 | 0.89159 | 1.0000 |
| O | O71  | 1.0 | 0.96723 | 0.45433 | 0.90521 | 1.0000 |
| O | O72  | 1.0 | 0.38075 | 0.32940 | 0.44108 | 1.0000 |
| O | O73  | 1.0 | 0.35237 | 0.17270 | 0.50953 | 1.0000 |
| O | O74  | 1.0 | 0.24063 | 0.16820 | 0.42431 | 1.0000 |
| O | O75  | 1.0 | 0.45116 | 0.13612 | 0.42508 | 1.0000 |
| O | O76  | 1.0 | 0.35086 | 0.49654 | 0.50154 | 1.0000 |
| O | O77  | 1.0 | 0.22644 | 0.46504 | 0.42160 | 1.0000 |
| O | O78  | 1.0 | 0.42822 | 0.52756 | 0.41096 | 1.0000 |
| O | O79  | 1.0 | 0.71603 | 0.35800 | 0.44486 | 1.0000 |
| O | O80  | 1.0 | 0.83036 | 0.18668 | 0.42625 | 1.0000 |
| O | O81  | 1.0 | 0.63792 | 0.20518 | 0.38927 | 1.0000 |
| O | O82  | 1.0 | 0.83988 | 0.52949 | 0.43472 | 1.0000 |
| O | O83  | 1.0 | 0.64108 | 0.54056 | 0.40877 | 1.0000 |
| O | O84  | 1.0 | 0.96212 | 0.35450 | 0.43709 | 1.0000 |
| O | O85  | 1.0 | 0.02368 | 0.17475 | 0.39347 | 1.0000 |
| O | O86  | 1.0 | 0.03470 | 0.54048 | 0.40300 | 1.0000 |
| O | O87  | 1.0 | 0.66779 | 0.37016 | 0.70099 | 1.0000 |
| O | O88  | 1.0 | 0.82723 | 0.33148 | 0.76452 | 1.0000 |
| O | O89  | 1.0 | 0.83447 | 0.25268 | 0.67105 | 1.0000 |
| O | O90  | 1.0 | 0.48684 | 0.31546 | 0.74740 | 1.0000 |
| O | O91  | 1.0 | 0.53102 | 0.23370 | 0.65768 | 1.0000 |
| O | O92  | 1.0 | 0.48314 | 0.44068 | 0.66903 | 1.0000 |
| O | O93  | 1.0 | 0.66377 | 0.71263 | 0.69170 | 1.0000 |
| O | O94  | 1.0 | 0.83495 | 0.83875 | 0.70030 | 1.0000 |
| O | O95  | 1.0 | 0.84398 | 0.66145 | 0.64561 | 1.0000 |
| O | O96  | 1.0 | 0.49472 | 0.83050 | 0.69976 | 1.0000 |
| O | O97  | 1.0 | 0.48016 | 0.64947 | 0.64997 | 1.0000 |
| O | O98  | 1.0 | 0.66395 | 0.96427 | 0.69168 | 1.0000 |
| O | O99  | 1.0 | 0.48327 | 0.00887 | 0.64615 | 1.0000 |
| O | O100 | 1.0 | 0.33329 | 0.63376 | 0.19921 | 1.0000 |
| O | O101 | 1.0 | 0.17463 | 0.66291 | 0.26284 | 1.0000 |
| O | O102 | 1.0 | 0.16398 | 0.74972 | 0.17003 | 1.0000 |

:

|    |      |     |         |         |         |        |
|----|------|-----|---------|---------|---------|--------|
| O  | O103 | 1.0 | 0.51176 | 0.69424 | 0.24513 | 1.0000 |
| O  | O104 | 1.0 | 0.47140 | 0.76546 | 0.15221 | 1.0000 |
| O  | O105 | 1.0 | 0.51901 | 0.55993 | 0.17122 | 1.0000 |
| O  | O106 | 1.0 | 0.33793 | 0.28404 | 0.19446 | 1.0000 |
| O  | O107 | 1.0 | 0.16254 | 0.16277 | 0.19868 | 1.0000 |
| O  | O108 | 1.0 | 0.16390 | 0.34082 | 0.14317 | 1.0000 |
| O  | O109 | 1.0 | 0.50559 | 0.16374 | 0.19652 | 1.0000 |
| O  | O110 | 1.0 | 0.51833 | 0.35236 | 0.15130 | 1.0000 |
| O  | O111 | 1.0 | 0.33190 | 0.03677 | 0.18601 | 1.0000 |
| O  | O112 | 1.0 | 0.51193 | 0.99207 | 0.14029 | 1.0000 |
| O  | O113 | 1.0 | 0.01413 | 0.82005 | 0.98979 | 1.0000 |
| O  | O114 | 1.0 | 0.00873 | 0.48521 | 0.00301 | 1.0000 |
| O  | O115 | 1.0 | 0.98672 | 0.17930 | 0.49293 | 1.0000 |
| O  | O116 | 1.0 | 0.99279 | 0.51517 | 0.50154 | 1.0000 |
| O  | O117 | 1.0 | 0.17550 | 0.98122 | 0.25157 | 1.0000 |
| O  | O118 | 1.0 | 0.49447 | 0.97442 | 0.24090 | 1.0000 |
| O  | O119 | 1.0 | 0.82048 | 0.01476 | 0.75600 | 1.0000 |
| O  | O120 | 1.0 | 0.49634 | 0.01393 | 0.74629 | 1.0000 |
| O  | O121 | 1.0 | 0.86025 | 0.46119 | 0.68979 | 1.0000 |
| O  | O122 | 1.0 | 0.46850 | 0.85959 | 0.05507 | 1.0000 |
| O  | O123 | 1.0 | 0.14225 | 0.53827 | 0.18848 | 1.0000 |
| O  | O124 | 1.0 | 0.83331 | 0.96355 | 0.85372 | 1.0000 |
| O  | O125 | 1.0 | 0.14349 | 0.97508 | 0.15280 | 1.0000 |
| O  | O126 | 1.0 | 0.85241 | 0.02755 | 0.65653 | 1.0000 |
| O  | O127 | 1.0 | 0.52609 | 0.83773 | 0.31980 | 1.0000 |
| O  | O128 | 1.0 | 0.14136 | 0.02356 | 0.34958 | 1.0000 |
| Al | Al1  | 1.0 | 0.46335 | 0.13629 | 0.62426 | 1.0000 |
| Al | Al2  | 1.0 | 0.86570 | 0.53143 | 0.62656 | 1.0000 |
| Al | Al3  | 1.0 | 0.53514 | 0.86672 | 0.11847 | 1.0000 |
| Al | Al4  | 1.0 | 0.13566 | 0.47087 | 0.12553 | 1.0000 |
| Al | Al5  | 1.0 | 0.15545 | 0.83926 | 0.12034 | 1.0000 |
| Al | Al6  | 1.0 | 0.84324 | 0.16309 | 0.62257 | 1.0000 |
| Al | Al7  | 1.0 | 0.47073 | 0.97174 | 0.30409 | 1.0000 |
| Al | Al8  | 1.0 | 0.15314 | 0.16381 | 0.37498 | 1.0000 |

:

|    |      |     |         |         |         |        |
|----|------|-----|---------|---------|---------|--------|
| Si | Si1  | 1.0 | 0.33674 | 0.54656 | 0.05912 | 1.0000 |
| Si | Si2  | 1.0 | 0.72159 | 0.79178 | 0.05498 | 1.0000 |
| Si | Si3  | 1.0 | 0.71006 | 0.53354 | 0.05445 | 1.0000 |
| Si | Si4  | 1.0 | 0.96465 | 0.78906 | 0.04530 | 1.0000 |
| Si | Si5  | 1.0 | 0.95269 | 0.53002 | 0.05398 | 1.0000 |
| Si | Si6  | 1.0 | 0.64659 | 0.20590 | 0.54692 | 1.0000 |
| Si | Si7  | 1.0 | 0.66300 | 0.45870 | 0.55958 | 1.0000 |
| Si | Si8  | 1.0 | 0.27833 | 0.20805 | 0.55918 | 1.0000 |
| Si | Si9  | 1.0 | 0.28942 | 0.46631 | 0.55435 | 1.0000 |
| Si | Si10 | 1.0 | 0.03526 | 0.21099 | 0.54798 | 1.0000 |
| Si | Si11 | 1.0 | 0.04691 | 0.47019 | 0.55350 | 1.0000 |
| Si | Si12 | 1.0 | 0.21234 | 0.35325 | 0.30186 | 1.0000 |
| Si | Si13 | 1.0 | 0.45912 | 0.34609 | 0.30783 | 1.0000 |
| Si | Si14 | 1.0 | 0.22392 | 0.71217 | 0.31421 | 1.0000 |
| Si | Si15 | 1.0 | 0.15059 | 0.51969 | 0.37942 | 1.0000 |
| Si | Si16 | 1.0 | 0.79209 | 0.64458 | 0.80427 | 1.0000 |
| Si | Si17 | 1.0 | 0.54219 | 0.64775 | 0.80704 | 1.0000 |
| Si | Si18 | 1.0 | 0.77342 | 0.28431 | 0.81625 | 1.0000 |
| Si | Si19 | 1.0 | 0.51829 | 0.27923 | 0.80395 | 1.0000 |
| Si | Si20 | 1.0 | 0.52237 | 0.03971 | 0.80453 | 1.0000 |
| Si | Si21 | 1.0 | 0.85174 | 0.47317 | 0.88082 | 1.0000 |
| Si | Si22 | 1.0 | 0.64923 | 0.78957 | 0.94432 | 1.0000 |
| Si | Si23 | 1.0 | 0.65349 | 0.53793 | 0.94376 | 1.0000 |
| Si | Si24 | 1.0 | 0.28302 | 0.77185 | 0.93351 | 1.0000 |
| Si | Si25 | 1.0 | 0.28058 | 0.51568 | 0.94903 | 1.0000 |
| Si | Si26 | 1.0 | 0.04311 | 0.77332 | 0.93483 | 1.0000 |
| Si | Si27 | 1.0 | 0.04227 | 0.51583 | 0.94583 | 1.0000 |
| Si | Si28 | 1.0 | 0.47680 | 0.84588 | 0.86946 | 1.0000 |
| Si | Si29 | 1.0 | 0.35225 | 0.20134 | 0.44863 | 1.0000 |
| Si | Si30 | 1.0 | 0.34630 | 0.45363 | 0.44427 | 1.0000 |
| Si | Si31 | 1.0 | 0.71285 | 0.23027 | 0.43726 | 1.0000 |
| Si | Si32 | 1.0 | 0.72100 | 0.48637 | 0.44902 | 1.0000 |
| Si | Si33 | 1.0 | 0.95315 | 0.22402 | 0.43749 | 1.0000 |
| Si | Si34 | 1.0 | 0.95780 | 0.48256 | 0.44505 | 1.0000 |

:



|    |      |     |         |         |         |        |
|----|------|-----|---------|---------|---------|--------|
| Si | Si35 | 1.0 | 0.52415 | 0.15127 | 0.37430 | 1.0000 |
| Si | Si36 | 1.0 | 0.54179 | 0.33698 | 0.69234 | 1.0000 |
| Si | Si37 | 1.0 | 0.79218 | 0.71440 | 0.69362 | 1.0000 |
| Si | Si38 | 1.0 | 0.53506 | 0.70918 | 0.69709 | 1.0000 |
| Si | Si39 | 1.0 | 0.53268 | 0.95502 | 0.69485 | 1.0000 |
| Si | Si40 | 1.0 | 0.45894 | 0.66611 | 0.18971 | 1.0000 |
| Si | Si41 | 1.0 | 0.20979 | 0.28642 | 0.19277 | 1.0000 |
| Si | Si42 | 1.0 | 0.46687 | 0.28545 | 0.19786 | 1.0000 |
| Si | Si43 | 1.0 | 0.46426 | 0.04001 | 0.19063 | 1.0000 |
| Si | Si44 | 1.0 | 0.52879 | 0.47150 | 0.12696 | 1.0000 |
| Si | Si45 | 1.0 | 0.47081 | 0.53101 | 0.62540 | 1.0000 |
| Si | Si46 | 1.0 | 0.53393 | 0.53005 | 0.37610 | 1.0000 |
| Si | Si47 | 1.0 | 0.46603 | 0.46158 | 0.87671 | 1.0000 |
| Si | Si48 | 1.0 | 0.79319 | 0.34559 | 0.70561 | 1.0000 |
| Si | Si49 | 1.0 | 0.34941 | 0.79804 | 0.04321 | 1.0000 |
| Si | Si50 | 1.0 | 0.20690 | 0.65410 | 0.20345 | 1.0000 |
| Si | Si51 | 1.0 | 0.77808 | 0.04186 | 0.81293 | 1.0000 |
| Si | Si52 | 1.0 | 0.84507 | 0.84115 | 0.87329 | 1.0000 |
| Si | Si53 | 1.0 | 0.20929 | 0.04339 | 0.19969 | 1.0000 |
| Si | Si54 | 1.0 | 0.78782 | 0.95774 | 0.70377 | 1.0000 |
| Si | Si55 | 1.0 | 0.47811 | 0.71590 | 0.30209 | 1.0000 |
| Si | Si56 | 1.0 | 0.21444 | 0.95113 | 0.30849 | 1.0000 |

RAI-T1-T1T2T9T3

data\_image0

\_chemical\_formula\_structural H4O128Si63  
\_chemical\_formula\_sum "H4 O128 Si63"  
\_cell\_length\_a 12.5372  
\_cell\_length\_b 12.498  
\_cell\_length\_c 26.5686  
\_cell\_angle\_alpha 90.6917  
\_cell\_angle\_beta 90.2111  
\_cell\_angle\_gamma 90.3816

\_space\_group\_name\_H-M\_alt "P 1"  
\_space\_group\_IT\_number 1

loop\_

\_space\_group\_symop\_operation\_xyz  
'x, y, z'

loop\_

\_atom\_site\_type\_symbol  
\_atom\_site\_label  
\_atom\_site\_symmetry\_multiplicity  
\_atom\_site\_fract\_x  
\_atom\_site\_fract\_y  
\_atom\_site\_fract\_z  
\_atom\_site\_occupancy  
H H1 1.0 0.85129 0.95314 0.63773 1.0000  
H H2 1.0 0.86946 0.87454 0.71320 1.0000  
H H3 1.0 0.76490 0.99122 0.73286 1.0000  
H H4 1.0 0.70117 0.99681 0.66242 1.0000  
O O1 1.0 0.30466 0.65620 0.06238 1.0000  
O O2 1.0 0.35230 0.82114 0.00310 1.0000  
O O3 1.0 0.22842 0.84708 0.08241 1.0000  
O O4 1.0 0.43754 0.81083 0.09250 1.0000

:

|   |     |     |         |         |         |        |
|---|-----|-----|---------|---------|---------|--------|
| O | O5  | 1.0 | 0.34126 | 0.50393 | 0.99364 | 1.0000 |
| O | O6  | 1.0 | 0.23575 | 0.45934 | 0.07720 | 1.0000 |
| O | O7  | 1.0 | 0.44437 | 0.50037 | 0.07999 | 1.0000 |
| O | O8  | 1.0 | 0.70334 | 0.66813 | 0.06733 | 1.0000 |
| O | O9  | 1.0 | 0.83177 | 0.83776 | 0.06260 | 1.0000 |
| O | O10 | 1.0 | 0.64213 | 0.85771 | 0.10165 | 1.0000 |
| O | O11 | 1.0 | 0.83414 | 0.49980 | 0.06036 | 1.0000 |
| O | O12 | 1.0 | 0.64818 | 0.47949 | 0.10200 | 1.0000 |
| O | O13 | 1.0 | 0.96151 | 0.66923 | 0.05544 | 1.0000 |
| O | O14 | 1.0 | 0.02106 | 0.84410 | 0.10414 | 1.0000 |
| O | O15 | 1.0 | 0.02849 | 0.48766 | 0.09443 | 1.0000 |
| O | O16 | 1.0 | 0.62951 | 0.33633 | 0.56073 | 1.0000 |
| O | O17 | 1.0 | 0.65552 | 0.17653 | 0.49419 | 1.0000 |
| O | O18 | 1.0 | 0.77997 | 0.19116 | 0.57435 | 1.0000 |
| O | O19 | 1.0 | 0.57495 | 0.13775 | 0.58398 | 1.0000 |
| O | O20 | 1.0 | 0.66314 | 0.49165 | 0.49450 | 1.0000 |
| O | O21 | 1.0 | 0.77256 | 0.49107 | 0.57989 | 1.0000 |
| O | O22 | 1.0 | 0.56412 | 0.53373 | 0.57821 | 1.0000 |
| O | O23 | 1.0 | 0.30580 | 0.32656 | 0.56214 | 1.0000 |
| O | O24 | 1.0 | 0.16905 | 0.16147 | 0.55819 | 1.0000 |
| O | O25 | 1.0 | 0.36183 | 0.13365 | 0.59096 | 1.0000 |
| O | O26 | 1.0 | 0.16936 | 0.48720 | 0.56579 | 1.0000 |
| O | O27 | 1.0 | 0.36141 | 0.50900 | 0.60532 | 1.0000 |
| O | O28 | 1.0 | 0.03080 | 0.32258 | 0.55971 | 1.0000 |
| O | O29 | 1.0 | 0.97762 | 0.13097 | 0.59468 | 1.0000 |
| O | O30 | 1.0 | 0.97789 | 0.50753 | 0.60172 | 1.0000 |
| O | O31 | 1.0 | 0.33784 | 0.31636 | 0.31573 | 1.0000 |
| O | O32 | 1.0 | 0.18475 | 0.34970 | 0.24738 | 1.0000 |
| O | O33 | 1.0 | 0.14980 | 0.22049 | 0.32371 | 1.0000 |
| O | O34 | 1.0 | 0.16674 | 0.43021 | 0.33868 | 1.0000 |
| O | O35 | 1.0 | 0.48109 | 0.34665 | 0.24288 | 1.0000 |
| O | O36 | 1.0 | 0.52936 | 0.23221 | 0.32310 | 1.0000 |
| O | O37 | 1.0 | 0.50726 | 0.44445 | 0.32942 | 1.0000 |
| O | O38 | 1.0 | 0.32738 | 0.70250 | 0.31847 | 1.0000 |

:

|   |     |     |         |         |         |        |
|---|-----|-----|---------|---------|---------|--------|
| O | O39 | 1.0 | 0.15638 | 0.82537 | 0.30498 | 1.0000 |
| O | O40 | 1.0 | 0.13582 | 0.63886 | 0.34644 | 1.0000 |
| O | O41 | 1.0 | 0.49322 | 0.83524 | 0.31307 | 1.0000 |
| O | O42 | 1.0 | 0.51224 | 0.64846 | 0.35723 | 1.0000 |
| O | O43 | 1.0 | 0.32197 | 0.95981 | 0.30601 | 1.0000 |
| O | O44 | 1.0 | 0.13757 | 0.01456 | 0.34727 | 1.0000 |
| O | O45 | 1.0 | 0.49732 | 0.02980 | 0.35064 | 1.0000 |
| O | O46 | 1.0 | 0.67219 | 0.70072 | 0.81761 | 1.0000 |
| O | O47 | 1.0 | 0.82320 | 0.67338 | 0.74731 | 1.0000 |
| O | O48 | 1.0 | 0.86874 | 0.76710 | 0.83473 | 1.0000 |
| O | O49 | 1.0 | 0.82670 | 0.55778 | 0.82814 | 1.0000 |
| O | O50 | 1.0 | 0.52340 | 0.66861 | 0.74766 | 1.0000 |
| O | O51 | 1.0 | 0.47982 | 0.77946 | 0.83113 | 1.0000 |
| O | O52 | 1.0 | 0.50607 | 0.56964 | 0.83333 | 1.0000 |
| O | O53 | 1.0 | 0.66879 | 0.31732 | 0.81429 | 1.0000 |
| O | O54 | 1.0 | 0.81729 | 0.16252 | 0.81818 | 1.0000 |
| O | O55 | 1.0 | 0.85985 | 0.35697 | 0.85055 | 1.0000 |
| O | O56 | 1.0 | 0.51365 | 0.17172 | 0.81351 | 1.0000 |
| O | O57 | 1.0 | 0.47234 | 0.36294 | 0.84408 | 1.0000 |
| O | O58 | 1.0 | 0.66172 | 0.01773 | 0.81589 | 1.0000 |
| O | O59 | 1.0 | 0.84974 | 0.97482 | 0.85664 | 1.0000 |
| O | O60 | 1.0 | 0.47120 | 0.98690 | 0.85275 | 1.0000 |
| O | O61 | 1.0 | 0.65233 | 0.66382 | 0.93546 | 1.0000 |
| O | O62 | 1.0 | 0.66026 | 0.82348 | 0.00311 | 1.0000 |
| O | O63 | 1.0 | 0.78360 | 0.82785 | 0.92255 | 1.0000 |
| O | O64 | 1.0 | 0.57329 | 0.85495 | 0.91473 | 1.0000 |
| O | O65 | 1.0 | 0.66040 | 0.50834 | 0.00333 | 1.0000 |
| O | O66 | 1.0 | 0.76995 | 0.48948 | 0.91885 | 1.0000 |
| O | O67 | 1.0 | 0.55763 | 0.47676 | 0.91916 | 1.0000 |
| O | O68 | 1.0 | 0.29311 | 0.67149 | 0.93726 | 1.0000 |
| O | O69 | 1.0 | 0.17478 | 0.84549 | 0.94879 | 1.0000 |
| O | O70 | 1.0 | 0.36117 | 0.85802 | 0.90566 | 1.0000 |
| O | O71 | 1.0 | 0.16454 | 0.50255 | 0.93695 | 1.0000 |
| O | O72 | 1.0 | 0.35302 | 0.49293 | 0.89396 | 1.0000 |

:

|   |      |     |         |         |         |        |
|---|------|-----|---------|---------|---------|--------|
| O | O73  | 1.0 | 0.04343 | 0.67671 | 0.94550 | 1.0000 |
| O | O74  | 1.0 | 0.98842 | 0.86092 | 0.90478 | 1.0000 |
| O | O75  | 1.0 | 0.97438 | 0.50490 | 0.89593 | 1.0000 |
| O | O76  | 1.0 | 0.30434 | 0.34242 | 0.43807 | 1.0000 |
| O | O77  | 1.0 | 0.33496 | 0.17123 | 0.49513 | 1.0000 |
| O | O78  | 1.0 | 0.23283 | 0.15201 | 0.40944 | 1.0000 |
| O | O79  | 1.0 | 0.44295 | 0.19172 | 0.41173 | 1.0000 |
| O | O80  | 1.0 | 0.33856 | 0.49802 | 0.50571 | 1.0000 |
| O | O81  | 1.0 | 0.24096 | 0.53787 | 0.41867 | 1.0000 |
| O | O82  | 1.0 | 0.44909 | 0.49751 | 0.42223 | 1.0000 |
| O | O83  | 1.0 | 0.70909 | 0.33163 | 0.43143 | 1.0000 |
| O | O84  | 1.0 | 0.83244 | 0.16030 | 0.43871 | 1.0000 |
| O | O85  | 1.0 | 0.64488 | 0.14344 | 0.39566 | 1.0000 |
| O | O86  | 1.0 | 0.83877 | 0.50071 | 0.44005 | 1.0000 |
| O | O87  | 1.0 | 0.65107 | 0.51861 | 0.39602 | 1.0000 |
| O | O88  | 1.0 | 0.96362 | 0.32941 | 0.44220 | 1.0000 |
| O | O89  | 1.0 | 0.02144 | 0.15090 | 0.39660 | 1.0000 |
| O | O90  | 1.0 | 0.03125 | 0.51250 | 0.40464 | 1.0000 |
| O | O91  | 1.0 | 0.67183 | 0.30411 | 0.68431 | 1.0000 |
| O | O92  | 1.0 | 0.83239 | 0.31843 | 0.75189 | 1.0000 |
| O | O93  | 1.0 | 0.85367 | 0.20592 | 0.66786 | 1.0000 |
| O | O94  | 1.0 | 0.84554 | 0.42113 | 0.66743 | 1.0000 |
| O | O95  | 1.0 | 0.51032 | 0.33089 | 0.74768 | 1.0000 |
| O | O96  | 1.0 | 0.47640 | 0.24370 | 0.65790 | 1.0000 |
| O | O97  | 1.0 | 0.52125 | 0.44985 | 0.66720 | 1.0000 |
| O | O98  | 1.0 | 0.67296 | 0.72357 | 0.68099 | 1.0000 |
| O | O99  | 1.0 | 0.86163 | 0.83050 | 0.68224 | 1.0000 |
| O | O100 | 1.0 | 0.84626 | 0.63040 | 0.64950 | 1.0000 |
| O | O101 | 1.0 | 0.50158 | 0.84198 | 0.69104 | 1.0000 |
| O | O102 | 1.0 | 0.48131 | 0.65274 | 0.65074 | 1.0000 |
| O | O103 | 1.0 | 0.66202 | 0.99135 | 0.69489 | 1.0000 |
| O | O104 | 1.0 | 0.80950 | 0.01363 | 0.62500 | 1.0000 |
| O | O105 | 1.0 | 0.47173 | 0.02996 | 0.65440 | 1.0000 |
| O | O106 | 1.0 | 0.34437 | 0.67840 | 0.18565 | 1.0000 |

:

|    |      |     |         |         |         |        |
|----|------|-----|---------|---------|---------|--------|
| O  | O107 | 1.0 | 0.18272 | 0.64867 | 0.24940 | 1.0000 |
| O  | O108 | 1.0 | 0.16234 | 0.77729 | 0.17170 | 1.0000 |
| O  | O109 | 1.0 | 0.17235 | 0.56568 | 0.15874 | 1.0000 |
| O  | O110 | 1.0 | 0.48997 | 0.65488 | 0.25817 | 1.0000 |
| O  | O111 | 1.0 | 0.53560 | 0.76816 | 0.17764 | 1.0000 |
| O  | O112 | 1.0 | 0.51447 | 0.55576 | 0.17140 | 1.0000 |
| O  | O113 | 1.0 | 0.32679 | 0.29335 | 0.17810 | 1.0000 |
| O  | O114 | 1.0 | 0.15677 | 0.17044 | 0.19310 | 1.0000 |
| O  | O115 | 1.0 | 0.13484 | 0.35728 | 0.15059 | 1.0000 |
| O  | O116 | 1.0 | 0.49546 | 0.16599 | 0.18931 | 1.0000 |
| O  | O117 | 1.0 | 0.51383 | 0.35152 | 0.14437 | 1.0000 |
| O  | O118 | 1.0 | 0.32507 | 0.03958 | 0.19392 | 1.0000 |
| O  | O119 | 1.0 | 0.14533 | 0.98278 | 0.14855 | 1.0000 |
| O  | O120 | 1.0 | 0.50406 | 0.97111 | 0.15220 | 1.0000 |
| O  | O121 | 1.0 | 0.00114 | 0.84495 | 0.00415 | 1.0000 |
| O  | O122 | 1.0 | 0.99473 | 0.50124 | 0.99576 | 1.0000 |
| O  | O123 | 1.0 | 0.00460 | 0.15751 | 0.49624 | 1.0000 |
| O  | O124 | 1.0 | 0.00486 | 0.49422 | 0.50290 | 1.0000 |
| O  | O125 | 1.0 | 0.15327 | 0.99671 | 0.24818 | 1.0000 |
| O  | O126 | 1.0 | 0.49369 | 0.00057 | 0.25126 | 1.0000 |
| O  | O127 | 1.0 | 0.82704 | 0.98700 | 0.75669 | 1.0000 |
| O  | O128 | 1.0 | 0.49506 | 0.00500 | 0.75363 | 1.0000 |
| Si | Si1  | 1.0 | 0.33125 | 0.78397 | 0.06056 | 1.0000 |
| Si | Si2  | 1.0 | 0.33228 | 0.52992 | 0.05351 | 1.0000 |
| Si | Si3  | 1.0 | 0.70935 | 0.79630 | 0.05828 | 1.0000 |
| Si | Si4  | 1.0 | 0.71181 | 0.53991 | 0.05775 | 1.0000 |
| Si | Si5  | 1.0 | 0.95383 | 0.79855 | 0.05638 | 1.0000 |
| Si | Si6  | 1.0 | 0.95532 | 0.54000 | 0.05127 | 1.0000 |
| Si | Si7  | 1.0 | 0.52954 | 0.85202 | 0.13118 | 1.0000 |
| Si | Si8  | 1.0 | 0.65964 | 0.21046 | 0.55332 | 1.0000 |
| Si | Si9  | 1.0 | 0.65855 | 0.46293 | 0.55363 | 1.0000 |
| Si | Si10 | 1.0 | 0.29173 | 0.19948 | 0.55123 | 1.0000 |
| Si | Si11 | 1.0 | 0.29367 | 0.45534 | 0.55943 | 1.0000 |
| Si | Si12 | 1.0 | 0.04529 | 0.19425 | 0.55199 | 1.0000 |

:

|    |      |     |         |         |         |        |
|----|------|-----|---------|---------|---------|--------|
| Si | Si13 | 1.0 | 0.04602 | 0.45186 | 0.55719 | 1.0000 |
| Si | Si14 | 1.0 | 0.47267 | 0.13793 | 0.62182 | 1.0000 |
| Si | Si15 | 1.0 | 0.20987 | 0.32966 | 0.30647 | 1.0000 |
| Si | Si16 | 1.0 | 0.46384 | 0.33535 | 0.30297 | 1.0000 |
| Si | Si17 | 1.0 | 0.20130 | 0.70431 | 0.30448 | 1.0000 |
| Si | Si18 | 1.0 | 0.45561 | 0.71080 | 0.31132 | 1.0000 |
| Si | Si19 | 1.0 | 0.19321 | 0.94922 | 0.30150 | 1.0000 |
| Si | Si20 | 1.0 | 0.45113 | 0.95626 | 0.30495 | 1.0000 |
| Si | Si21 | 1.0 | 0.14471 | 0.52861 | 0.37736 | 1.0000 |
| Si | Si22 | 1.0 | 0.79739 | 0.67484 | 0.80697 | 1.0000 |
| Si | Si23 | 1.0 | 0.54536 | 0.67929 | 0.80763 | 1.0000 |
| Si | Si24 | 1.0 | 0.79448 | 0.28772 | 0.80846 | 1.0000 |
| Si | Si25 | 1.0 | 0.54250 | 0.29553 | 0.80432 | 1.0000 |
| Si | Si26 | 1.0 | 0.78997 | 0.03613 | 0.81138 | 1.0000 |
| Si | Si27 | 1.0 | 0.53660 | 0.04571 | 0.80857 | 1.0000 |
| Si | Si28 | 1.0 | 0.85676 | 0.47780 | 0.87372 | 1.0000 |
| Si | Si29 | 1.0 | 0.66740 | 0.79237 | 0.94366 | 1.0000 |
| Si | Si30 | 1.0 | 0.66104 | 0.53526 | 0.94388 | 1.0000 |
| Si | Si31 | 1.0 | 0.29485 | 0.79869 | 0.94890 | 1.0000 |
| Si | Si32 | 1.0 | 0.28764 | 0.54254 | 0.94090 | 1.0000 |
| Si | Si33 | 1.0 | 0.05171 | 0.80600 | 0.95085 | 1.0000 |
| Si | Si34 | 1.0 | 0.04405 | 0.54701 | 0.94365 | 1.0000 |
| Si | Si35 | 1.0 | 0.47307 | 0.86823 | 0.87638 | 1.0000 |
| Si | Si36 | 1.0 | 0.32924 | 0.21459 | 0.43798 | 1.0000 |
| Si | Si37 | 1.0 | 0.33376 | 0.46894 | 0.44597 | 1.0000 |
| Si | Si38 | 1.0 | 0.71083 | 0.20344 | 0.44034 | 1.0000 |
| Si | Si39 | 1.0 | 0.71583 | 0.46007 | 0.44067 | 1.0000 |
| Si | Si40 | 1.0 | 0.95545 | 0.20006 | 0.44355 | 1.0000 |
| Si | Si41 | 1.0 | 0.95956 | 0.45855 | 0.44780 | 1.0000 |
| Si | Si42 | 1.0 | 0.52761 | 0.14930 | 0.37002 | 1.0000 |
| Si | Si43 | 1.0 | 0.80057 | 0.31281 | 0.69276 | 1.0000 |
| Si | Si44 | 1.0 | 0.54558 | 0.33227 | 0.68916 | 1.0000 |
| Si | Si45 | 1.0 | 0.80077 | 0.71500 | 0.69047 | 1.0000 |
| Si | Si46 | 1.0 | 0.54613 | 0.72125 | 0.69303 | 1.0000 |

:

|    |      |     |         |         |         |        |
|----|------|-----|---------|---------|---------|--------|
| Si | Si47 | 1.0 | 0.53328 | 0.96666 | 0.69823 | 1.0000 |
| Si | Si48 | 1.0 | 0.85878 | 0.51226 | 0.62491 | 1.0000 |
| Si | Si49 | 1.0 | 0.21548 | 0.66692 | 0.19106 | 1.0000 |
| Si | Si50 | 1.0 | 0.47090 | 0.66390 | 0.19796 | 1.0000 |
| Si | Si51 | 1.0 | 0.20107 | 0.29238 | 0.19253 | 1.0000 |
| Si | Si52 | 1.0 | 0.45409 | 0.28866 | 0.18909 | 1.0000 |
| Si | Si53 | 1.0 | 0.19600 | 0.04752 | 0.19608 | 1.0000 |
| Si | Si54 | 1.0 | 0.45416 | 0.04403 | 0.19686 | 1.0000 |
| Si | Si55 | 1.0 | 0.14346 | 0.46843 | 0.12005 | 1.0000 |
| Si | Si56 | 1.0 | 0.13998 | 0.86143 | 0.12659 | 1.0000 |
| Si | Si57 | 1.0 | 0.52869 | 0.47270 | 0.12445 | 1.0000 |
| Si | Si58 | 1.0 | 0.85637 | 0.13490 | 0.61601 | 1.0000 |
| Si | Si59 | 1.0 | 0.48143 | 0.53463 | 0.62526 | 1.0000 |
| Si | Si60 | 1.0 | 0.13571 | 0.13580 | 0.36946 | 1.0000 |
| Si | Si61 | 1.0 | 0.52887 | 0.52677 | 0.37618 | 1.0000 |
| Si | Si62 | 1.0 | 0.87075 | 0.85737 | 0.87951 | 1.0000 |
| Si | Si63 | 1.0 | 0.47286 | 0.47737 | 0.87279 | 1.0000 |



RAI-T2-T1T2T4T7

data\_image0

\_chemical\_formula\_structural H4O128Si63  
\_chemical\_formula\_sum "H4 O128 Si63"  
\_cell\_length\_a 12.5034  
\_cell\_length\_b 12.5551  
\_cell\_length\_c 26.4341  
\_cell\_angle\_alpha 89.6898  
\_cell\_angle\_beta 90.27  
\_cell\_angle\_gamma 90.208

\_space\_group\_name\_H-M\_alt "P 1"  
\_space\_group\_IT\_number 1

loop\_

\_space\_group\_symop\_operation\_xyz  
'x, y, z'

loop\_

\_atom\_site\_type\_symbol  
\_atom\_site\_label  
\_atom\_site\_symmetry\_multiplicity  
\_atom\_site\_fract\_x  
\_atom\_site\_fract\_y  
\_atom\_site\_fract\_z  
\_atom\_site\_occupancy  
H H1 1.0 0.53503 0.85894 0.34965 1.0000  
H H2 1.0 0.52791 0.01141 0.31583 1.0000  
H H3 1.0 0.34623 0.97099 0.34151 1.0000  
H H4 1.0 0.41044 0.98604 0.26951 1.0000  
O O1 1.0 0.29778 0.66415 0.06127 1.0000  
O O2 1.0 0.34601 0.82680 0.99992 1.0000  
O O3 1.0 0.23084 0.85746 0.08221 1.0000  
O O4 1.0 0.43950 0.81098 0.08851 1.0000

:

|   |     |     |         |         |         |        |
|---|-----|-----|---------|---------|---------|--------|
| O | O5  | 1.0 | 0.34122 | 0.51116 | 0.99521 | 1.0000 |
| O | O6  | 1.0 | 0.23719 | 0.46779 | 0.08061 | 1.0000 |
| O | O7  | 1.0 | 0.44527 | 0.51508 | 0.08174 | 1.0000 |
| O | O8  | 1.0 | 0.70797 | 0.66991 | 0.07062 | 1.0000 |
| O | O9  | 1.0 | 0.83075 | 0.84215 | 0.05805 | 1.0000 |
| O | O10 | 1.0 | 0.64283 | 0.86094 | 0.09937 | 1.0000 |
| O | O11 | 1.0 | 0.83468 | 0.49999 | 0.06123 | 1.0000 |
| O | O12 | 1.0 | 0.64807 | 0.48258 | 0.10576 | 1.0000 |
| O | O13 | 1.0 | 0.95551 | 0.67199 | 0.05158 | 1.0000 |
| O | O14 | 1.0 | 0.02109 | 0.84155 | 0.10050 | 1.0000 |
| O | O15 | 1.0 | 0.02948 | 0.50014 | 0.09795 | 1.0000 |
| O | O16 | 1.0 | 0.69662 | 0.34252 | 0.56212 | 1.0000 |
| O | O17 | 1.0 | 0.66074 | 0.18646 | 0.49701 | 1.0000 |
| O | O18 | 1.0 | 0.75226 | 0.14576 | 0.58648 | 1.0000 |
| O | O19 | 1.0 | 0.54704 | 0.19388 | 0.58044 | 1.0000 |
| O | O20 | 1.0 | 0.67089 | 0.50307 | 0.49580 | 1.0000 |
| O | O21 | 1.0 | 0.77975 | 0.53121 | 0.58018 | 1.0000 |
| O | O22 | 1.0 | 0.56703 | 0.50624 | 0.58069 | 1.0000 |
| O | O23 | 1.0 | 0.29868 | 0.31997 | 0.56854 | 1.0000 |
| O | O24 | 1.0 | 0.16045 | 0.15967 | 0.56457 | 1.0000 |
| O | O25 | 1.0 | 0.35203 | 0.13133 | 0.60397 | 1.0000 |
| O | O26 | 1.0 | 0.17249 | 0.49002 | 0.55760 | 1.0000 |
| O | O27 | 1.0 | 0.35973 | 0.51029 | 0.60080 | 1.0000 |
| O | O28 | 1.0 | 0.03231 | 0.33059 | 0.55862 | 1.0000 |
| O | O29 | 1.0 | 0.96361 | 0.14531 | 0.59324 | 1.0000 |
| O | O30 | 1.0 | 0.98698 | 0.51126 | 0.60429 | 1.0000 |
| O | O31 | 1.0 | 0.34105 | 0.35584 | 0.31336 | 1.0000 |
| O | O32 | 1.0 | 0.17467 | 0.34007 | 0.24984 | 1.0000 |
| O | O33 | 1.0 | 0.18234 | 0.22026 | 0.33224 | 1.0000 |
| O | O34 | 1.0 | 0.15026 | 0.42987 | 0.33795 | 1.0000 |
| O | O35 | 1.0 | 0.49034 | 0.32830 | 0.24242 | 1.0000 |
| O | O36 | 1.0 | 0.49795 | 0.21626 | 0.32757 | 1.0000 |
| O | O37 | 1.0 | 0.54029 | 0.42374 | 0.32706 | 1.0000 |
| O | O38 | 1.0 | 0.33763 | 0.74698 | 0.31459 | 1.0000 |

:

|   |     |     |         |         |         |        |
|---|-----|-----|---------|---------|---------|--------|
| O | O39 | 1.0 | 0.14833 | 0.83149 | 0.30948 | 1.0000 |
| O | O40 | 1.0 | 0.16601 | 0.64144 | 0.35021 | 1.0000 |
| O | O41 | 1.0 | 0.46899 | 0.61318 | 0.35659 | 1.0000 |
| O | O42 | 1.0 | 0.30887 | 0.98078 | 0.30938 | 1.0000 |
| O | O43 | 1.0 | 0.11540 | 0.02142 | 0.34649 | 1.0000 |
| O | O44 | 1.0 | 0.51583 | 0.01461 | 0.35285 | 1.0000 |
| O | O45 | 1.0 | 0.65842 | 0.69713 | 0.81397 | 1.0000 |
| O | O46 | 1.0 | 0.81863 | 0.65585 | 0.75084 | 1.0000 |
| O | O47 | 1.0 | 0.85200 | 0.76794 | 0.83409 | 1.0000 |
| O | O48 | 1.0 | 0.81117 | 0.55877 | 0.83794 | 1.0000 |
| O | O49 | 1.0 | 0.50983 | 0.66535 | 0.74324 | 1.0000 |
| O | O50 | 1.0 | 0.46220 | 0.76315 | 0.82908 | 1.0000 |
| O | O51 | 1.0 | 0.50092 | 0.55433 | 0.82754 | 1.0000 |
| O | O52 | 1.0 | 0.67139 | 0.29373 | 0.82112 | 1.0000 |
| O | O53 | 1.0 | 0.84216 | 0.16850 | 0.81224 | 1.0000 |
| O | O54 | 1.0 | 0.86248 | 0.35755 | 0.85116 | 1.0000 |
| O | O55 | 1.0 | 0.50274 | 0.16450 | 0.81114 | 1.0000 |
| O | O56 | 1.0 | 0.48147 | 0.35168 | 0.85382 | 1.0000 |
| O | O57 | 1.0 | 0.67351 | 0.04002 | 0.80324 | 1.0000 |
| O | O58 | 1.0 | 0.84936 | 0.97709 | 0.85055 | 1.0000 |
| O | O59 | 1.0 | 0.49623 | 0.96981 | 0.84591 | 1.0000 |
| O | O60 | 1.0 | 0.68771 | 0.65885 | 0.93475 | 1.0000 |
| O | O61 | 1.0 | 0.65515 | 0.81507 | 0.00161 | 1.0000 |
| O | O62 | 1.0 | 0.77718 | 0.84587 | 0.92130 | 1.0000 |
| O | O63 | 1.0 | 0.56591 | 0.82555 | 0.91200 | 1.0000 |
| O | O64 | 1.0 | 0.65578 | 0.51351 | 0.00696 | 1.0000 |
| O | O65 | 1.0 | 0.77137 | 0.46699 | 0.92610 | 1.0000 |
| O | O66 | 1.0 | 0.55971 | 0.49178 | 0.91983 | 1.0000 |
| O | O67 | 1.0 | 0.30174 | 0.67484 | 0.93331 | 1.0000 |
| O | O68 | 1.0 | 0.17219 | 0.84212 | 0.94175 | 1.0000 |
| O | O69 | 1.0 | 0.36012 | 0.86664 | 0.90158 | 1.0000 |
| O | O70 | 1.0 | 0.16691 | 0.50963 | 0.93678 | 1.0000 |
| O | O71 | 1.0 | 0.35503 | 0.48954 | 0.89542 | 1.0000 |
| O | O72 | 1.0 | 0.03775 | 0.67671 | 0.94407 | 1.0000 |

:

|   |      |     |         |         |         |        |
|---|------|-----|---------|---------|---------|--------|
| O | O73  | 1.0 | 0.98375 | 0.85839 | 0.89993 | 1.0000 |
| O | O74  | 1.0 | 0.97358 | 0.50189 | 0.89829 | 1.0000 |
| O | O75  | 1.0 | 0.29972 | 0.31276 | 0.43833 | 1.0000 |
| O | O76  | 1.0 | 0.33081 | 0.15683 | 0.50495 | 1.0000 |
| O | O77  | 1.0 | 0.22442 | 0.12073 | 0.41901 | 1.0000 |
| O | O78  | 1.0 | 0.43483 | 0.15042 | 0.41942 | 1.0000 |
| O | O79  | 1.0 | 0.35084 | 0.46990 | 0.50292 | 1.0000 |
| O | O80  | 1.0 | 0.25227 | 0.51264 | 0.41728 | 1.0000 |
| O | O81  | 1.0 | 0.45709 | 0.44769 | 0.41847 | 1.0000 |
| O | O82  | 1.0 | 0.70755 | 0.34500 | 0.43246 | 1.0000 |
| O | O83  | 1.0 | 0.83306 | 0.17644 | 0.43820 | 1.0000 |
| O | O84  | 1.0 | 0.64069 | 0.15864 | 0.39831 | 1.0000 |
| O | O85  | 1.0 | 0.83946 | 0.51393 | 0.43460 | 1.0000 |
| O | O86  | 1.0 | 0.64584 | 0.53252 | 0.39712 | 1.0000 |
| O | O87  | 1.0 | 0.96484 | 0.34493 | 0.44261 | 1.0000 |
| O | O88  | 1.0 | 0.02216 | 0.17233 | 0.39539 | 1.0000 |
| O | O89  | 1.0 | 0.04022 | 0.52986 | 0.40781 | 1.0000 |
| O | O90  | 1.0 | 0.66446 | 0.31589 | 0.68401 | 1.0000 |
| O | O91  | 1.0 | 0.82073 | 0.33793 | 0.75265 | 1.0000 |
| O | O92  | 1.0 | 0.84983 | 0.22483 | 0.66889 | 1.0000 |
| O | O93  | 1.0 | 0.83648 | 0.43615 | 0.66607 | 1.0000 |
| O | O94  | 1.0 | 0.51647 | 0.34124 | 0.75563 | 1.0000 |
| O | O95  | 1.0 | 0.47165 | 0.23372 | 0.67220 | 1.0000 |
| O | O96  | 1.0 | 0.49826 | 0.44539 | 0.67101 | 1.0000 |
| O | O97  | 1.0 | 0.67330 | 0.70702 | 0.68130 | 1.0000 |
| O | O98  | 1.0 | 0.84636 | 0.83019 | 0.69459 | 1.0000 |
| O | O99  | 1.0 | 0.86721 | 0.64330 | 0.65407 | 1.0000 |
| O | O100 | 1.0 | 0.50543 | 0.83824 | 0.68387 | 1.0000 |
| O | O101 | 1.0 | 0.48580 | 0.64836 | 0.64427 | 1.0000 |
| O | O102 | 1.0 | 0.67814 | 0.95762 | 0.69645 | 1.0000 |
| O | O103 | 1.0 | 0.85536 | 0.01746 | 0.65014 | 1.0000 |
| O | O104 | 1.0 | 0.51322 | 0.03321 | 0.64624 | 1.0000 |
| O | O105 | 1.0 | 0.34672 | 0.68344 | 0.18437 | 1.0000 |
| O | O106 | 1.0 | 0.19165 | 0.66087 | 0.25227 | 1.0000 |

:

|    |      |     |         |         |         |        |
|----|------|-----|---------|---------|---------|--------|
| O  | O107 | 1.0 | 0.16146 | 0.77874 | 0.17019 | 1.0000 |
| O  | O108 | 1.0 | 0.17414 | 0.56688 | 0.16441 | 1.0000 |
| O  | O109 | 1.0 | 0.49032 | 0.65742 | 0.25910 | 1.0000 |
| O  | O110 | 1.0 | 0.54016 | 0.76311 | 0.17434 | 1.0000 |
| O  | O111 | 1.0 | 0.51195 | 0.55193 | 0.17559 | 1.0000 |
| O  | O112 | 1.0 | 0.32312 | 0.29261 | 0.18244 | 1.0000 |
| O  | O113 | 1.0 | 0.15013 | 0.17040 | 0.19065 | 1.0000 |
| O  | O114 | 1.0 | 0.13317 | 0.36172 | 0.15222 | 1.0000 |
| O  | O115 | 1.0 | 0.49016 | 0.16102 | 0.18161 | 1.0000 |
| O  | O116 | 1.0 | 0.50526 | 0.35357 | 0.14276 | 1.0000 |
| O  | O117 | 1.0 | 0.31699 | 0.03753 | 0.18780 | 1.0000 |
| O  | O118 | 1.0 | 0.13228 | 0.98337 | 0.14757 | 1.0000 |
| O  | O119 | 1.0 | 0.50009 | 0.96647 | 0.15025 | 1.0000 |
| O  | O120 | 1.0 | 0.00231 | 0.84753 | 0.00021 | 1.0000 |
| O  | O121 | 1.0 | 0.00040 | 0.50125 | 0.99820 | 1.0000 |
| O  | O122 | 1.0 | 0.00720 | 0.16941 | 0.49545 | 1.0000 |
| O  | O123 | 1.0 | 0.99275 | 0.50646 | 0.50473 | 1.0000 |
| O  | O124 | 1.0 | 0.14897 | 0.99701 | 0.24702 | 1.0000 |
| O  | O125 | 1.0 | 0.47731 | 0.99996 | 0.24996 | 1.0000 |
| O  | O126 | 1.0 | 0.84999 | 0.00379 | 0.75070 | 1.0000 |
| O  | O127 | 1.0 | 0.50189 | 0.00367 | 0.74636 | 1.0000 |
| O  | O128 | 1.0 | 0.54566 | 0.80249 | 0.32501 | 1.0000 |
| Si | Si1  | 1.0 | 0.32917 | 0.79045 | 0.05841 | 1.0000 |
| Si | Si2  | 1.0 | 0.33132 | 0.53929 | 0.05490 | 1.0000 |
| Si | Si3  | 1.0 | 0.70930 | 0.79644 | 0.05715 | 1.0000 |
| Si | Si4  | 1.0 | 0.71222 | 0.54236 | 0.06081 | 1.0000 |
| Si | Si5  | 1.0 | 0.95261 | 0.80070 | 0.05248 | 1.0000 |
| Si | Si6  | 1.0 | 0.95544 | 0.54330 | 0.05219 | 1.0000 |
| Si | Si7  | 1.0 | 0.52965 | 0.85033 | 0.12867 | 1.0000 |
| Si | Si8  | 1.0 | 0.66419 | 0.21718 | 0.55665 | 1.0000 |
| Si | Si9  | 1.0 | 0.67799 | 0.47039 | 0.55504 | 1.0000 |
| Si | Si10 | 1.0 | 0.28523 | 0.19257 | 0.55995 | 1.0000 |
| Si | Si11 | 1.0 | 0.29468 | 0.44708 | 0.55733 | 1.0000 |
| Si | Si12 | 1.0 | 0.04083 | 0.20235 | 0.55279 | 1.0000 |

:

|    |      |     |         |         |         |        |
|----|------|-----|---------|---------|---------|--------|
| Si | Si13 | 1.0 | 0.04661 | 0.45908 | 0.55616 | 1.0000 |
| Si | Si14 | 1.0 | 0.47232 | 0.14806 | 0.62612 | 1.0000 |
| Si | Si15 | 1.0 | 0.21246 | 0.33613 | 0.30850 | 1.0000 |
| Si | Si16 | 1.0 | 0.46688 | 0.33040 | 0.30247 | 1.0000 |
| Si | Si17 | 1.0 | 0.21169 | 0.71877 | 0.30644 | 1.0000 |
| Si | Si18 | 1.0 | 0.17921 | 0.95640 | 0.30329 | 1.0000 |
| Si | Si19 | 1.0 | 0.15287 | 0.52749 | 0.37805 | 1.0000 |
| Si | Si20 | 1.0 | 0.78536 | 0.66978 | 0.80963 | 1.0000 |
| Si | Si21 | 1.0 | 0.53265 | 0.66912 | 0.80363 | 1.0000 |
| Si | Si22 | 1.0 | 0.79850 | 0.28951 | 0.80889 | 1.0000 |
| Si | Si23 | 1.0 | 0.54366 | 0.28713 | 0.81015 | 1.0000 |
| Si | Si24 | 1.0 | 0.80305 | 0.04685 | 0.80404 | 1.0000 |
| Si | Si25 | 1.0 | 0.54405 | 0.04411 | 0.80150 | 1.0000 |
| Si | Si26 | 1.0 | 0.85454 | 0.47208 | 0.87876 | 1.0000 |
| Si | Si27 | 1.0 | 0.67079 | 0.78635 | 0.94234 | 1.0000 |
| Si | Si28 | 1.0 | 0.66840 | 0.53274 | 0.94670 | 1.0000 |
| Si | Si29 | 1.0 | 0.29470 | 0.80172 | 0.94449 | 1.0000 |
| Si | Si30 | 1.0 | 0.29090 | 0.54680 | 0.94068 | 1.0000 |
| Si | Si31 | 1.0 | 0.04875 | 0.80533 | 0.94664 | 1.0000 |
| Si | Si32 | 1.0 | 0.04461 | 0.54788 | 0.94463 | 1.0000 |
| Si | Si33 | 1.0 | 0.47239 | 0.85573 | 0.87189 | 1.0000 |
| Si | Si34 | 1.0 | 0.32320 | 0.18552 | 0.44520 | 1.0000 |
| Si | Si35 | 1.0 | 0.34010 | 0.43617 | 0.44397 | 1.0000 |
| Si | Si36 | 1.0 | 0.71028 | 0.21731 | 0.44185 | 1.0000 |
| Si | Si37 | 1.0 | 0.71680 | 0.47304 | 0.44031 | 1.0000 |
| Si | Si38 | 1.0 | 0.95618 | 0.21631 | 0.44325 | 1.0000 |
| Si | Si39 | 1.0 | 0.95966 | 0.47341 | 0.44735 | 1.0000 |
| Si | Si40 | 1.0 | 0.52260 | 0.13675 | 0.37483 | 1.0000 |
| Si | Si41 | 1.0 | 0.79290 | 0.32897 | 0.69289 | 1.0000 |
| Si | Si42 | 1.0 | 0.53788 | 0.33407 | 0.69550 | 1.0000 |
| Si | Si43 | 1.0 | 0.80012 | 0.70946 | 0.69538 | 1.0000 |
| Si | Si44 | 1.0 | 0.54446 | 0.71526 | 0.68870 | 1.0000 |
| Si | Si45 | 1.0 | 0.80733 | 0.95261 | 0.69797 | 1.0000 |
| Si | Si46 | 1.0 | 0.54913 | 0.95841 | 0.69336 | 1.0000 |

:

|    |      |     |         |         |         |        |
|----|------|-----|---------|---------|---------|--------|
| Si | Si47 | 1.0 | 0.86722 | 0.52923 | 0.62597 | 1.0000 |
| Si | Si48 | 1.0 | 0.21840 | 0.67223 | 0.19239 | 1.0000 |
| Si | Si49 | 1.0 | 0.47241 | 0.66449 | 0.19853 | 1.0000 |
| Si | Si50 | 1.0 | 0.19597 | 0.29096 | 0.19400 | 1.0000 |
| Si | Si51 | 1.0 | 0.45205 | 0.28348 | 0.18763 | 1.0000 |
| Si | Si52 | 1.0 | 0.18846 | 0.04753 | 0.19351 | 1.0000 |
| Si | Si53 | 1.0 | 0.44678 | 0.04107 | 0.19282 | 1.0000 |
| Si | Si54 | 1.0 | 0.14423 | 0.47546 | 0.12352 | 1.0000 |
| Si | Si55 | 1.0 | 0.13759 | 0.86389 | 0.12487 | 1.0000 |
| Si | Si56 | 1.0 | 0.52640 | 0.47640 | 0.12645 | 1.0000 |
| Si | Si57 | 1.0 | 0.85410 | 0.13504 | 0.62471 | 1.0000 |
| Si | Si58 | 1.0 | 0.47856 | 0.52690 | 0.62410 | 1.0000 |
| Si | Si59 | 1.0 | 0.13640 | 0.13554 | 0.37357 | 1.0000 |
| Si | Si60 | 1.0 | 0.52795 | 0.50528 | 0.37434 | 1.0000 |
| Si | Si61 | 1.0 | 0.86421 | 0.86120 | 0.87629 | 1.0000 |
| Si | Si62 | 1.0 | 0.47492 | 0.47307 | 0.87412 | 1.0000 |
| Si | Si63 | 1.0 | 0.46172 | 0.70720 | 0.31410 | 1.0000 |

RAI-T7-T2T3T6T5

data\_image0

\_chemical\_formula\_structural H4O128Si63  
\_chemical\_formula\_sum "H4 O128 Si63"  
\_cell\_length\_a 12.527  
\_cell\_length\_b 12.5324  
\_cell\_length\_c 26.2543  
\_cell\_angle\_alpha 89.7317  
\_cell\_angle\_beta 90.4542  
\_cell\_angle\_gamma 89.9108

\_space\_group\_name\_H-M\_alt "P 1"  
\_space\_group\_IT\_number 1

loop\_

\_space\_group\_symop\_operation\_xyz  
'x, y, z'

loop\_

\_atom\_site\_type\_symbol  
\_atom\_site\_label  
\_atom\_site\_symmetry\_multiplicity  
\_atom\_site\_fract\_x  
\_atom\_site\_fract\_y  
\_atom\_site\_fract\_z  
\_atom\_site\_occupancy  
H H1 1.0 0.49275 0.13103 0.53588 1.0000  
H H2 1.0 0.37039 0.08172 0.62020 1.0000  
H H3 1.0 0.52490 0.04126 0.60792 1.0000  
H H4 1.0 0.44817 0.21849 0.64993 1.0000  
O O1 1.0 0.32729 0.66388 0.06973 1.0000  
O O2 1.0 0.34656 0.81272 0.99758 1.0000  
O O3 1.0 0.21809 0.84486 0.07519 1.0000  
O O4 1.0 0.42755 0.84803 0.08838 1.0000

:



|   |     |     |         |         |         |        |
|---|-----|-----|---------|---------|---------|--------|
| O | O5  | 1.0 | 0.34419 | 0.52579 | 0.99248 | 1.0000 |
| O | O6  | 1.0 | 0.23438 | 0.47347 | 0.07430 | 1.0000 |
| O | O7  | 1.0 | 0.44702 | 0.48947 | 0.07766 | 1.0000 |
| O | O8  | 1.0 | 0.70755 | 0.67906 | 0.06899 | 1.0000 |
| O | O9  | 1.0 | 0.82753 | 0.84955 | 0.05305 | 1.0000 |
| O | O10 | 1.0 | 0.63847 | 0.87017 | 0.09445 | 1.0000 |
| O | O11 | 1.0 | 0.83593 | 0.50964 | 0.06462 | 1.0000 |
| O | O12 | 1.0 | 0.64809 | 0.49666 | 0.10920 | 1.0000 |
| O | O13 | 1.0 | 0.95943 | 0.68046 | 0.05552 | 1.0000 |
| O | O14 | 1.0 | 0.01360 | 0.86355 | 0.09782 | 1.0000 |
| O | O15 | 1.0 | 0.03201 | 0.50472 | 0.10036 | 1.0000 |
| O | O16 | 1.0 | 0.63527 | 0.32031 | 0.56128 | 1.0000 |
| O | O17 | 1.0 | 0.69893 | 0.18077 | 0.49126 | 1.0000 |
| O | O18 | 1.0 | 0.75142 | 0.14961 | 0.58766 | 1.0000 |
| O | O19 | 1.0 | 0.66460 | 0.48655 | 0.50075 | 1.0000 |
| O | O20 | 1.0 | 0.77861 | 0.46908 | 0.58562 | 1.0000 |
| O | O21 | 1.0 | 0.57035 | 0.51426 | 0.58825 | 1.0000 |
| O | O22 | 1.0 | 0.28918 | 0.33030 | 0.57030 | 1.0000 |
| O | O23 | 1.0 | 0.15654 | 0.16574 | 0.55966 | 1.0000 |
| O | O24 | 1.0 | 0.16990 | 0.50411 | 0.56092 | 1.0000 |
| O | O25 | 1.0 | 0.35864 | 0.51737 | 0.60194 | 1.0000 |
| O | O26 | 1.0 | 0.03500 | 0.33991 | 0.55543 | 1.0000 |
| O | O27 | 1.0 | 0.96261 | 0.16413 | 0.59833 | 1.0000 |
| O | O28 | 1.0 | 0.98140 | 0.51874 | 0.60236 | 1.0000 |
| O | O29 | 1.0 | 0.33921 | 0.37577 | 0.30898 | 1.0000 |
| O | O30 | 1.0 | 0.17312 | 0.33095 | 0.24807 | 1.0000 |
| O | O31 | 1.0 | 0.20480 | 0.22218 | 0.33421 | 1.0000 |
| O | O32 | 1.0 | 0.14232 | 0.42665 | 0.33543 | 1.0000 |
| O | O33 | 1.0 | 0.50003 | 0.32943 | 0.24641 | 1.0000 |
| O | O34 | 1.0 | 0.48623 | 0.23308 | 0.33595 | 1.0000 |
| O | O35 | 1.0 | 0.53575 | 0.44082 | 0.32887 | 1.0000 |
| O | O36 | 1.0 | 0.32978 | 0.71674 | 0.30895 | 1.0000 |
| O | O37 | 1.0 | 0.15416 | 0.83281 | 0.30977 | 1.0000 |
| O | O38 | 1.0 | 0.15337 | 0.63908 | 0.34796 | 1.0000 |

:

|   |     |     |         |         |         |        |
|---|-----|-----|---------|---------|---------|--------|
| O | O39 | 1.0 | 0.50020 | 0.83912 | 0.31614 | 1.0000 |
| O | O40 | 1.0 | 0.50036 | 0.64437 | 0.35480 | 1.0000 |
| O | O41 | 1.0 | 0.32519 | 0.96088 | 0.31108 | 1.0000 |
| O | O42 | 1.0 | 0.14225 | 0.02339 | 0.35056 | 1.0000 |
| O | O43 | 1.0 | 0.49947 | 0.02768 | 0.35900 | 1.0000 |
| O | O44 | 1.0 | 0.66629 | 0.68574 | 0.81195 | 1.0000 |
| O | O45 | 1.0 | 0.82242 | 0.65027 | 0.74469 | 1.0000 |
| O | O46 | 1.0 | 0.86317 | 0.75090 | 0.83037 | 1.0000 |
| O | O47 | 1.0 | 0.81997 | 0.54243 | 0.83051 | 1.0000 |
| O | O48 | 1.0 | 0.50332 | 0.65444 | 0.74836 | 1.0000 |
| O | O49 | 1.0 | 0.46899 | 0.73861 | 0.83913 | 1.0000 |
| O | O50 | 1.0 | 0.51926 | 0.53588 | 0.83095 | 1.0000 |
| O | O51 | 1.0 | 0.66267 | 0.28484 | 0.82048 | 1.0000 |
| O | O52 | 1.0 | 0.82837 | 0.15320 | 0.81683 | 1.0000 |
| O | O53 | 1.0 | 0.84699 | 0.34386 | 0.86113 | 1.0000 |
| O | O54 | 1.0 | 0.49258 | 0.15471 | 0.81442 | 1.0000 |
| O | O55 | 1.0 | 0.47167 | 0.33910 | 0.85470 | 1.0000 |
| O | O56 | 1.0 | 0.65842 | 0.02696 | 0.80212 | 1.0000 |
| O | O57 | 1.0 | 0.83047 | 0.95719 | 0.84914 | 1.0000 |
| O | O58 | 1.0 | 0.47155 | 0.94815 | 0.82676 | 1.0000 |
| O | O59 | 1.0 | 0.63818 | 0.65908 | 0.93208 | 1.0000 |
| O | O60 | 1.0 | 0.65120 | 0.82024 | 0.99729 | 1.0000 |
| O | O61 | 1.0 | 0.78416 | 0.81039 | 0.91971 | 1.0000 |
| O | O62 | 1.0 | 0.57881 | 0.85654 | 0.90430 | 1.0000 |
| O | O63 | 1.0 | 0.65723 | 0.51768 | 0.00878 | 1.0000 |
| O | O64 | 1.0 | 0.76821 | 0.49020 | 0.92535 | 1.0000 |
| O | O65 | 1.0 | 0.55592 | 0.46603 | 0.92511 | 1.0000 |
| O | O66 | 1.0 | 0.29058 | 0.67520 | 0.92518 | 1.0000 |
| O | O67 | 1.0 | 0.17231 | 0.84612 | 0.93984 | 1.0000 |
| O | O68 | 1.0 | 0.36515 | 0.86666 | 0.90154 | 1.0000 |
| O | O69 | 1.0 | 0.16563 | 0.50512 | 0.93730 | 1.0000 |
| O | O70 | 1.0 | 0.35442 | 0.48842 | 0.89350 | 1.0000 |
| O | O71 | 1.0 | 0.04103 | 0.67601 | 0.94130 | 1.0000 |
| O | O72 | 1.0 | 0.98392 | 0.85626 | 0.89618 | 1.0000 |

:

|   |      |     |         |         |         |        |
|---|------|-----|---------|---------|---------|--------|
| O | O73  | 1.0 | 0.97094 | 0.49512 | 0.89969 | 1.0000 |
| O | O74  | 1.0 | 0.31153 | 0.32071 | 0.44187 | 1.0000 |
| O | O75  | 1.0 | 0.34474 | 0.16638 | 0.51305 | 1.0000 |
| O | O76  | 1.0 | 0.25112 | 0.12461 | 0.42262 | 1.0000 |
| O | O77  | 1.0 | 0.45965 | 0.16867 | 0.43188 | 1.0000 |
| O | O78  | 1.0 | 0.34404 | 0.48273 | 0.50395 | 1.0000 |
| O | O79  | 1.0 | 0.22963 | 0.50896 | 0.41941 | 1.0000 |
| O | O80  | 1.0 | 0.44011 | 0.48235 | 0.41569 | 1.0000 |
| O | O81  | 1.0 | 0.70820 | 0.34424 | 0.42792 | 1.0000 |
| O | O82  | 1.0 | 0.84788 | 0.18192 | 0.42102 | 1.0000 |
| O | O83  | 1.0 | 0.65025 | 0.15670 | 0.39204 | 1.0000 |
| O | O84  | 1.0 | 0.83312 | 0.51391 | 0.44125 | 1.0000 |
| O | O85  | 1.0 | 0.64245 | 0.53737 | 0.40372 | 1.0000 |
| O | O86  | 1.0 | 0.96875 | 0.34860 | 0.44372 | 1.0000 |
| O | O87  | 1.0 | 0.05088 | 0.17861 | 0.40053 | 1.0000 |
| O | O88  | 1.0 | 0.02174 | 0.53122 | 0.40119 | 1.0000 |
| O | O89  | 1.0 | 0.67377 | 0.35977 | 0.69317 | 1.0000 |
| O | O90  | 1.0 | 0.82966 | 0.32915 | 0.76094 | 1.0000 |
| O | O91  | 1.0 | 0.83402 | 0.22521 | 0.67351 | 1.0000 |
| O | O92  | 1.0 | 0.86706 | 0.43502 | 0.67657 | 1.0000 |
| O | O93  | 1.0 | 0.50706 | 0.32667 | 0.75469 | 1.0000 |
| O | O94  | 1.0 | 0.48587 | 0.44907 | 0.67580 | 1.0000 |
| O | O95  | 1.0 | 0.66039 | 0.70779 | 0.68555 | 1.0000 |
| O | O96  | 1.0 | 0.83430 | 0.82701 | 0.68694 | 1.0000 |
| O | O97  | 1.0 | 0.83602 | 0.63563 | 0.64443 | 1.0000 |
| O | O98  | 1.0 | 0.49613 | 0.83783 | 0.69729 | 1.0000 |
| O | O99  | 1.0 | 0.47381 | 0.65421 | 0.64870 | 1.0000 |
| O | O100 | 1.0 | 0.66844 | 0.96171 | 0.68282 | 1.0000 |
| O | O101 | 1.0 | 0.85833 | 0.02107 | 0.65004 | 1.0000 |
| O | O102 | 1.0 | 0.33932 | 0.69895 | 0.18920 | 1.0000 |
| O | O103 | 1.0 | 0.17017 | 0.66244 | 0.24868 | 1.0000 |
| O | O104 | 1.0 | 0.14537 | 0.76309 | 0.16165 | 1.0000 |
| O | O105 | 1.0 | 0.19154 | 0.55535 | 0.16446 | 1.0000 |
| O | O106 | 1.0 | 0.50074 | 0.67008 | 0.25432 | 1.0000 |

:

|    |      |     |         |         |         |        |
|----|------|-----|---------|---------|---------|--------|
| O  | O107 | 1.0 | 0.53634 | 0.75138 | 0.16252 | 1.0000 |
| O  | O108 | 1.0 | 0.48787 | 0.54777 | 0.17323 | 1.0000 |
| O  | O109 | 1.0 | 0.33372 | 0.30248 | 0.18428 | 1.0000 |
| O  | O110 | 1.0 | 0.17152 | 0.16511 | 0.18566 | 1.0000 |
| O  | O111 | 1.0 | 0.14318 | 0.35567 | 0.14755 | 1.0000 |
| O  | O112 | 1.0 | 0.49400 | 0.16139 | 0.18569 | 1.0000 |
| O  | O113 | 1.0 | 0.52253 | 0.34981 | 0.14612 | 1.0000 |
| O  | O114 | 1.0 | 0.33230 | 0.02471 | 0.19425 | 1.0000 |
| O  | O115 | 1.0 | 0.15093 | 0.97375 | 0.14954 | 1.0000 |
| O  | O116 | 1.0 | 0.52063 | 0.96258 | 0.16128 | 1.0000 |
| O  | O117 | 1.0 | 0.00110 | 0.84798 | 0.99699 | 1.0000 |
| O  | O118 | 1.0 | 0.99927 | 0.50864 | 0.00004 | 1.0000 |
| O  | O119 | 1.0 | 0.98891 | 0.17173 | 0.49787 | 1.0000 |
| O  | O120 | 1.0 | 0.00079 | 0.51742 | 0.50186 | 1.0000 |
| O  | O121 | 1.0 | 0.15902 | 0.00275 | 0.25012 | 1.0000 |
| O  | O122 | 1.0 | 0.49702 | 0.01405 | 0.25833 | 1.0000 |
| O  | O123 | 1.0 | 0.83109 | 0.99361 | 0.74887 | 1.0000 |
| O  | O124 | 1.0 | 0.49960 | 0.03057 | 0.73397 | 1.0000 |
| O  | O125 | 1.0 | 0.55513 | 0.12007 | 0.55806 | 1.0000 |
| O  | O126 | 1.0 | 0.33703 | 0.15301 | 0.61590 | 1.0000 |
| O  | O127 | 1.0 | 0.52073 | 0.23766 | 0.66115 | 1.0000 |
| O  | O128 | 1.0 | 0.48303 | 0.99890 | 0.63300 | 1.0000 |
| Si | Si1  | 1.0 | 0.33041 | 0.79191 | 0.05790 | 1.0000 |
| Si | Si2  | 1.0 | 0.33803 | 0.53845 | 0.05364 | 1.0000 |
| Si | Si3  | 1.0 | 0.70661 | 0.80423 | 0.05306 | 1.0000 |
| Si | Si4  | 1.0 | 0.71288 | 0.55064 | 0.06251 | 1.0000 |
| Si | Si5  | 1.0 | 0.95025 | 0.80935 | 0.05055 | 1.0000 |
| Si | Si6  | 1.0 | 0.95689 | 0.55114 | 0.05480 | 1.0000 |
| Si | Si7  | 1.0 | 0.52951 | 0.85738 | 0.12658 | 1.0000 |
| Si | Si8  | 1.0 | 0.66234 | 0.44740 | 0.55968 | 1.0000 |
| Si | Si9  | 1.0 | 0.28044 | 0.20217 | 0.56520 | 1.0000 |
| Si | Si10 | 1.0 | 0.29013 | 0.45763 | 0.55898 | 1.0000 |
| Si | Si11 | 1.0 | 0.03528 | 0.21077 | 0.55295 | 1.0000 |
| Si | Si12 | 1.0 | 0.04636 | 0.46894 | 0.55520 | 1.0000 |

:

|    |      |     |         |         |         |        |
|----|------|-----|---------|---------|---------|--------|
| Si | Si13 | 1.0 | 0.21448 | 0.33838 | 0.30669 | 1.0000 |
| Si | Si14 | 1.0 | 0.46548 | 0.34409 | 0.30518 | 1.0000 |
| Si | Si15 | 1.0 | 0.20163 | 0.71299 | 0.30366 | 1.0000 |
| Si | Si16 | 1.0 | 0.45831 | 0.71767 | 0.30813 | 1.0000 |
| Si | Si17 | 1.0 | 0.19613 | 0.95483 | 0.30513 | 1.0000 |
| Si | Si18 | 1.0 | 0.45467 | 0.96017 | 0.31088 | 1.0000 |
| Si | Si19 | 1.0 | 0.13840 | 0.52518 | 0.37559 | 1.0000 |
| Si | Si20 | 1.0 | 0.79257 | 0.65674 | 0.80462 | 1.0000 |
| Si | Si21 | 1.0 | 0.53995 | 0.65360 | 0.80769 | 1.0000 |
| Si | Si22 | 1.0 | 0.79141 | 0.27756 | 0.81475 | 1.0000 |
| Si | Si23 | 1.0 | 0.53467 | 0.27659 | 0.81027 | 1.0000 |
| Si | Si24 | 1.0 | 0.78724 | 0.03342 | 0.80379 | 1.0000 |
| Si | Si25 | 1.0 | 0.53075 | 0.03950 | 0.79405 | 1.0000 |
| Si | Si26 | 1.0 | 0.85143 | 0.46795 | 0.87928 | 1.0000 |
| Si | Si27 | 1.0 | 0.66273 | 0.78642 | 0.93797 | 1.0000 |
| Si | Si28 | 1.0 | 0.65561 | 0.53366 | 0.94754 | 1.0000 |
| Si | Si29 | 1.0 | 0.29315 | 0.79992 | 0.94125 | 1.0000 |
| Si | Si30 | 1.0 | 0.28785 | 0.54841 | 0.93742 | 1.0000 |
| Si | Si31 | 1.0 | 0.04988 | 0.80534 | 0.94374 | 1.0000 |
| Si | Si32 | 1.0 | 0.04370 | 0.54662 | 0.94464 | 1.0000 |
| Si | Si33 | 1.0 | 0.47233 | 0.85275 | 0.86808 | 1.0000 |
| Si | Si34 | 1.0 | 0.34051 | 0.19571 | 0.45201 | 1.0000 |
| Si | Si35 | 1.0 | 0.33193 | 0.44941 | 0.44470 | 1.0000 |
| Si | Si36 | 1.0 | 0.72589 | 0.21636 | 0.43346 | 1.0000 |
| Si | Si37 | 1.0 | 0.71251 | 0.46916 | 0.44421 | 1.0000 |
| Si | Si38 | 1.0 | 0.96459 | 0.21977 | 0.44114 | 1.0000 |
| Si | Si39 | 1.0 | 0.95609 | 0.47699 | 0.44716 | 1.0000 |
| Si | Si40 | 1.0 | 0.52402 | 0.14723 | 0.37891 | 1.0000 |
| Si | Si41 | 1.0 | 0.80026 | 0.33635 | 0.70082 | 1.0000 |
| Si | Si42 | 1.0 | 0.54518 | 0.34118 | 0.69602 | 1.0000 |
| Si | Si43 | 1.0 | 0.78875 | 0.70587 | 0.69069 | 1.0000 |
| Si | Si44 | 1.0 | 0.53329 | 0.71438 | 0.69530 | 1.0000 |
| Si | Si45 | 1.0 | 0.79651 | 0.95059 | 0.69262 | 1.0000 |
| Si | Si46 | 1.0 | 0.53855 | 0.95840 | 0.68608 | 1.0000 |

:

|    |      |     |         |         |         |        |
|----|------|-----|---------|---------|---------|--------|
| Si | Si47 | 1.0 | 0.86384 | 0.51463 | 0.62751 | 1.0000 |
| Si | Si48 | 1.0 | 0.21224 | 0.66988 | 0.19043 | 1.0000 |
| Si | Si49 | 1.0 | 0.46546 | 0.66674 | 0.19462 | 1.0000 |
| Si | Si50 | 1.0 | 0.20580 | 0.28879 | 0.19162 | 1.0000 |
| Si | Si51 | 1.0 | 0.46170 | 0.28576 | 0.19097 | 1.0000 |
| Si | Si52 | 1.0 | 0.20393 | 0.04169 | 0.19518 | 1.0000 |
| Si | Si53 | 1.0 | 0.46020 | 0.04066 | 0.20007 | 1.0000 |
| Si | Si54 | 1.0 | 0.14981 | 0.47292 | 0.12117 | 1.0000 |
| Si | Si55 | 1.0 | 0.13341 | 0.86100 | 0.12127 | 1.0000 |
| Si | Si56 | 1.0 | 0.52634 | 0.47244 | 0.12629 | 1.0000 |
| Si | Si57 | 1.0 | 0.85111 | 0.14150 | 0.62729 | 1.0000 |
| Si | Si58 | 1.0 | 0.47400 | 0.53205 | 0.62861 | 1.0000 |
| Si | Si59 | 1.0 | 0.16208 | 0.13834 | 0.37704 | 1.0000 |
| Si | Si60 | 1.0 | 0.52815 | 0.52597 | 0.37547 | 1.0000 |
| Si | Si61 | 1.0 | 0.86395 | 0.84370 | 0.87346 | 1.0000 |
| Si | Si62 | 1.0 | 0.47500 | 0.45942 | 0.87639 | 1.0000 |
| Si | Si63 | 1.0 | 0.66060 | 0.19538 | 0.54966 | 1.0000 |

RAI-T9-T1XT5YT5XT1Y

data\_image0

\_chemical\_formula\_structural H4O128Si63  
\_chemical\_formula\_sum "H4 O128 Si63"  
\_cell\_length\_a 12.4927  
\_cell\_length\_b 12.4932  
\_cell\_length\_c 26.505  
\_cell\_angle\_alpha 90.3746  
\_cell\_angle\_beta 90.4357  
\_cell\_angle\_gamma 90.7811

\_space\_group\_name\_H-M\_alt "P 1"  
\_space\_group\_IT\_number 1

loop\_

\_space\_group\_symop\_operation\_xyz  
'x, y, z'

loop\_

\_atom\_site\_type\_symbol  
\_atom\_site\_label  
\_atom\_site\_symmetry\_multiplicity  
\_atom\_site\_fract\_x  
\_atom\_site\_fract\_y  
\_atom\_site\_fract\_z  
\_atom\_site\_occupancy  
H H1 1.0 0.93381 0.04264 0.64382 1.0000  
H H2 1.0 0.85108 0.16978 0.68335 1.0000  
H H3 1.0 0.76506 0.17345 0.61827 1.0000  
H H4 1.0 0.88580 0.11793 0.57650 1.0000  
O O1 1.0 0.31563 0.65699 0.06143 1.0000  
O O2 1.0 0.35504 0.82355 0.00131 1.0000  
O O3 1.0 0.22599 0.84265 0.07912 1.0000  
O O4 1.0 0.43693 0.82173 0.09215 1.0000

:

|   |     |     |         |         |         |        |
|---|-----|-----|---------|---------|---------|--------|
| O | O5  | 1.0 | 0.34817 | 0.50711 | 0.99105 | 1.0000 |
| O | O6  | 1.0 | 0.23062 | 0.46366 | 0.07147 | 1.0000 |
| O | O7  | 1.0 | 0.44257 | 0.49133 | 0.07935 | 1.0000 |
| O | O8  | 1.0 | 0.70762 | 0.67443 | 0.06901 | 1.0000 |
| O | O9  | 1.0 | 0.83152 | 0.84457 | 0.05564 | 1.0000 |
| O | O10 | 1.0 | 0.64441 | 0.86532 | 0.09920 | 1.0000 |
| O | O11 | 1.0 | 0.83256 | 0.50258 | 0.05787 | 1.0000 |
| O | O12 | 1.0 | 0.64818 | 0.48710 | 0.10424 | 1.0000 |
| O | O13 | 1.0 | 0.95889 | 0.67292 | 0.05476 | 1.0000 |
| O | O14 | 1.0 | 0.01833 | 0.85132 | 0.10128 | 1.0000 |
| O | O15 | 1.0 | 0.02690 | 0.49432 | 0.09709 | 1.0000 |
| O | O16 | 1.0 | 0.67331 | 0.32898 | 0.56092 | 1.0000 |
| O | O17 | 1.0 | 0.67364 | 0.16839 | 0.49215 | 1.0000 |
| O | O18 | 1.0 | 0.75664 | 0.14265 | 0.58334 | 1.0000 |
| O | O19 | 1.0 | 0.54418 | 0.16081 | 0.56906 | 1.0000 |
| O | O20 | 1.0 | 0.65921 | 0.49635 | 0.50092 | 1.0000 |
| O | O21 | 1.0 | 0.77141 | 0.51022 | 0.58593 | 1.0000 |
| O | O22 | 1.0 | 0.55936 | 0.49752 | 0.58795 | 1.0000 |
| O | O23 | 1.0 | 0.32447 | 0.32774 | 0.56536 | 1.0000 |
| O | O24 | 1.0 | 0.16080 | 0.18182 | 0.56575 | 1.0000 |
| O | O25 | 1.0 | 0.34958 | 0.13676 | 0.60297 | 1.0000 |
| O | O26 | 1.0 | 0.16550 | 0.46218 | 0.56602 | 1.0000 |
| O | O27 | 1.0 | 0.35227 | 0.52762 | 0.59935 | 1.0000 |
| O | O28 | 1.0 | 0.00176 | 0.31945 | 0.55939 | 1.0000 |
| O | O29 | 1.0 | 0.96454 | 0.11259 | 0.58342 | 1.0000 |
| O | O30 | 1.0 | 0.98143 | 0.50887 | 0.60316 | 1.0000 |
| O | O31 | 1.0 | 0.33345 | 0.36636 | 0.31485 | 1.0000 |
| O | O32 | 1.0 | 0.17698 | 0.34617 | 0.24602 | 1.0000 |
| O | O33 | 1.0 | 0.18329 | 0.21498 | 0.32387 | 1.0000 |
| O | O34 | 1.0 | 0.13483 | 0.42018 | 0.33727 | 1.0000 |
| O | O35 | 1.0 | 0.48618 | 0.34513 | 0.24543 | 1.0000 |
| O | O36 | 1.0 | 0.49360 | 0.23044 | 0.32878 | 1.0000 |
| O | O37 | 1.0 | 0.52961 | 0.44145 | 0.33091 | 1.0000 |
| O | O38 | 1.0 | 0.32706 | 0.70335 | 0.31533 | 1.0000 |

:



|   |     |     |         |         |         |        |
|---|-----|-----|---------|---------|---------|--------|
| O | O39 | 1.0 | 0.15511 | 0.82421 | 0.30384 | 1.0000 |
| O | O40 | 1.0 | 0.13676 | 0.63414 | 0.34304 | 1.0000 |
| O | O41 | 1.0 | 0.49484 | 0.83512 | 0.31470 | 1.0000 |
| O | O42 | 1.0 | 0.50719 | 0.64557 | 0.35739 | 1.0000 |
| O | O43 | 1.0 | 0.32260 | 0.95894 | 0.30716 | 1.0000 |
| O | O44 | 1.0 | 0.13567 | 0.01392 | 0.34582 | 1.0000 |
| O | O45 | 1.0 | 0.49934 | 0.02743 | 0.35370 | 1.0000 |
| O | O46 | 1.0 | 0.66878 | 0.69160 | 0.81276 | 1.0000 |
| O | O47 | 1.0 | 0.83507 | 0.66346 | 0.75057 | 1.0000 |
| O | O48 | 1.0 | 0.85967 | 0.76922 | 0.83581 | 1.0000 |
| O | O49 | 1.0 | 0.82481 | 0.55663 | 0.83420 | 1.0000 |
| O | O50 | 1.0 | 0.50960 | 0.67058 | 0.74760 | 1.0000 |
| O | O51 | 1.0 | 0.47165 | 0.73554 | 0.84223 | 1.0000 |
| O | O52 | 1.0 | 0.51871 | 0.53623 | 0.82432 | 1.0000 |
| O | O53 | 1.0 | 0.65558 | 0.28493 | 0.81578 | 1.0000 |
| O | O54 | 1.0 | 0.83065 | 0.16435 | 0.81350 | 1.0000 |
| O | O55 | 1.0 | 0.83774 | 0.35326 | 0.85850 | 1.0000 |
| O | O56 | 1.0 | 0.48720 | 0.15107 | 0.81453 | 1.0000 |
| O | O57 | 1.0 | 0.46729 | 0.34164 | 0.85192 | 1.0000 |
| O | O58 | 1.0 | 0.66252 | 0.03475 | 0.82497 | 1.0000 |
| O | O59 | 1.0 | 0.85028 | 0.97784 | 0.85874 | 1.0000 |
| O | O60 | 1.0 | 0.47303 | 0.94365 | 0.82913 | 1.0000 |
| O | O61 | 1.0 | 0.64763 | 0.66599 | 0.93215 | 1.0000 |
| O | O62 | 1.0 | 0.65140 | 0.82157 | 0.00127 | 1.0000 |
| O | O63 | 1.0 | 0.78661 | 0.82908 | 0.92539 | 1.0000 |
| O | O64 | 1.0 | 0.57962 | 0.85940 | 0.90809 | 1.0000 |
| O | O65 | 1.0 | 0.64976 | 0.51957 | 0.00570 | 1.0000 |
| O | O66 | 1.0 | 0.77396 | 0.49649 | 0.92700 | 1.0000 |
| O | O67 | 1.0 | 0.56180 | 0.47338 | 0.91808 | 1.0000 |
| O | O68 | 1.0 | 0.29976 | 0.67434 | 0.93420 | 1.0000 |
| O | O69 | 1.0 | 0.17848 | 0.84460 | 0.94498 | 1.0000 |
| O | O70 | 1.0 | 0.36723 | 0.86490 | 0.90411 | 1.0000 |
| O | O71 | 1.0 | 0.16967 | 0.50455 | 0.93534 | 1.0000 |
| O | O72 | 1.0 | 0.35813 | 0.49666 | 0.89073 | 1.0000 |

:

|   |      |     |         |         |         |        |
|---|------|-----|---------|---------|---------|--------|
| O | O73  | 1.0 | 0.04417 | 0.67465 | 0.94220 | 1.0000 |
| O | O74  | 1.0 | 0.99101 | 0.85977 | 0.90222 | 1.0000 |
| O | O75  | 1.0 | 0.97549 | 0.49322 | 0.89843 | 1.0000 |
| O | O76  | 1.0 | 0.30501 | 0.32812 | 0.43913 | 1.0000 |
| O | O77  | 1.0 | 0.32404 | 0.16257 | 0.50296 | 1.0000 |
| O | O78  | 1.0 | 0.23616 | 0.13490 | 0.41339 | 1.0000 |
| O | O79  | 1.0 | 0.44606 | 0.17377 | 0.42290 | 1.0000 |
| O | O80  | 1.0 | 0.32788 | 0.49293 | 0.50193 | 1.0000 |
| O | O81  | 1.0 | 0.23820 | 0.52024 | 0.41242 | 1.0000 |
| O | O82  | 1.0 | 0.44604 | 0.48663 | 0.42017 | 1.0000 |
| O | O83  | 1.0 | 0.70714 | 0.33958 | 0.43594 | 1.0000 |
| O | O84  | 1.0 | 0.83951 | 0.17171 | 0.43115 | 1.0000 |
| O | O85  | 1.0 | 0.64504 | 0.15854 | 0.39235 | 1.0000 |
| O | O86  | 1.0 | 0.83606 | 0.50887 | 0.44566 | 1.0000 |
| O | O87  | 1.0 | 0.64938 | 0.53050 | 0.40294 | 1.0000 |
| O | O88  | 1.0 | 0.96686 | 0.34085 | 0.43860 | 1.0000 |
| O | O89  | 1.0 | 0.03023 | 0.16765 | 0.39025 | 1.0000 |
| O | O90  | 1.0 | 0.02530 | 0.52975 | 0.40590 | 1.0000 |
| O | O91  | 1.0 | 0.65560 | 0.36944 | 0.69330 | 1.0000 |
| O | O92  | 1.0 | 0.81963 | 0.34073 | 0.75876 | 1.0000 |
| O | O93  | 1.0 | 0.79535 | 0.22254 | 0.67432 | 1.0000 |
| O | O94  | 1.0 | 0.85144 | 0.43244 | 0.67210 | 1.0000 |
| O | O95  | 1.0 | 0.49196 | 0.31812 | 0.75275 | 1.0000 |
| O | O96  | 1.0 | 0.50097 | 0.23513 | 0.66091 | 1.0000 |
| O | O97  | 1.0 | 0.46450 | 0.44363 | 0.67425 | 1.0000 |
| O | O98  | 1.0 | 0.67791 | 0.70168 | 0.68682 | 1.0000 |
| O | O99  | 1.0 | 0.85110 | 0.83346 | 0.69048 | 1.0000 |
| O | O100 | 1.0 | 0.86512 | 0.64150 | 0.65245 | 1.0000 |
| O | O101 | 1.0 | 0.52269 | 0.84201 | 0.68864 | 1.0000 |
| O | O102 | 1.0 | 0.48736 | 0.64979 | 0.64931 | 1.0000 |
| O | O103 | 1.0 | 0.69582 | 0.97149 | 0.67686 | 1.0000 |
| O | O104 | 1.0 | 0.50354 | 0.02578 | 0.64389 | 1.0000 |
| O | O105 | 1.0 | 0.34528 | 0.69309 | 0.18664 | 1.0000 |
| O | O106 | 1.0 | 0.18029 | 0.64872 | 0.24682 | 1.0000 |

:

|    |      |     |         |         |         |        |
|----|------|-----|---------|---------|---------|--------|
| O  | O107 | 1.0 | 0.15517 | 0.77167 | 0.16753 | 1.0000 |
| O  | O108 | 1.0 | 0.18716 | 0.56149 | 0.15719 | 1.0000 |
| O  | O109 | 1.0 | 0.49398 | 0.65863 | 0.25741 | 1.0000 |
| O  | O110 | 1.0 | 0.54242 | 0.76714 | 0.17464 | 1.0000 |
| O  | O111 | 1.0 | 0.50420 | 0.55678 | 0.17076 | 1.0000 |
| O  | O112 | 1.0 | 0.32963 | 0.29508 | 0.18095 | 1.0000 |
| O  | O113 | 1.0 | 0.15942 | 0.16831 | 0.19026 | 1.0000 |
| O  | O114 | 1.0 | 0.14010 | 0.35574 | 0.14723 | 1.0000 |
| O  | O115 | 1.0 | 0.49924 | 0.16719 | 0.19095 | 1.0000 |
| O  | O116 | 1.0 | 0.51819 | 0.35238 | 0.14655 | 1.0000 |
| O  | O117 | 1.0 | 0.32921 | 0.03896 | 0.19378 | 1.0000 |
| O  | O118 | 1.0 | 0.15155 | 0.98012 | 0.14678 | 1.0000 |
| O  | O119 | 1.0 | 0.51171 | 0.97324 | 0.15450 | 1.0000 |
| O  | O120 | 1.0 | 0.00732 | 0.84404 | 0.00140 | 1.0000 |
| O  | O121 | 1.0 | 0.00325 | 0.50363 | 0.99786 | 1.0000 |
| O  | O122 | 1.0 | 0.01716 | 0.16721 | 0.48973 | 1.0000 |
| O  | O123 | 1.0 | 0.00617 | 0.49765 | 0.50414 | 1.0000 |
| O  | O124 | 1.0 | 0.15557 | 0.99539 | 0.24676 | 1.0000 |
| O  | O125 | 1.0 | 0.49609 | 0.00201 | 0.25358 | 1.0000 |
| O  | O126 | 1.0 | 0.81443 | 0.98148 | 0.76059 | 1.0000 |
| O  | O127 | 1.0 | 0.54310 | 0.02107 | 0.74168 | 1.0000 |
| O  | O128 | 1.0 | 0.90270 | 0.04195 | 0.67791 | 1.0000 |
| Si | Si1  | 1.0 | 0.33395 | 0.78617 | 0.05897 | 1.0000 |
| Si | Si2  | 1.0 | 0.33480 | 0.52983 | 0.05114 | 1.0000 |
| Si | Si3  | 1.0 | 0.70868 | 0.80125 | 0.05590 | 1.0000 |
| Si | Si4  | 1.0 | 0.71073 | 0.54626 | 0.05888 | 1.0000 |
| Si | Si5  | 1.0 | 0.95350 | 0.80241 | 0.05322 | 1.0000 |
| Si | Si6  | 1.0 | 0.95569 | 0.54346 | 0.05168 | 1.0000 |
| Si | Si7  | 1.0 | 0.53334 | 0.85661 | 0.13028 | 1.0000 |
| Si | Si8  | 1.0 | 0.66168 | 0.20082 | 0.55098 | 1.0000 |
| Si | Si9  | 1.0 | 0.66546 | 0.45832 | 0.55932 | 1.0000 |
| Si | Si10 | 1.0 | 0.28821 | 0.20242 | 0.55887 | 1.0000 |
| Si | Si11 | 1.0 | 0.29234 | 0.45250 | 0.55763 | 1.0000 |
| Si | Si12 | 1.0 | 0.03630 | 0.19501 | 0.54959 | 1.0000 |

:

|    |      |     |         |         |         |        |
|----|------|-----|---------|---------|---------|--------|
| Si | Si13 | 1.0 | 0.03871 | 0.44533 | 0.55786 | 1.0000 |
| Si | Si14 | 1.0 | 0.47515 | 0.14076 | 0.61996 | 1.0000 |
| Si | Si15 | 1.0 | 0.20702 | 0.33696 | 0.30558 | 1.0000 |
| Si | Si16 | 1.0 | 0.46040 | 0.34504 | 0.30515 | 1.0000 |
| Si | Si17 | 1.0 | 0.20051 | 0.70354 | 0.30198 | 1.0000 |
| Si | Si18 | 1.0 | 0.45598 | 0.71093 | 0.31081 | 1.0000 |
| Si | Si19 | 1.0 | 0.19340 | 0.94823 | 0.30083 | 1.0000 |
| Si | Si20 | 1.0 | 0.45245 | 0.95617 | 0.30707 | 1.0000 |
| Si | Si21 | 1.0 | 0.13536 | 0.52441 | 0.37463 | 1.0000 |
| Si | Si22 | 1.0 | 0.79691 | 0.67001 | 0.80873 | 1.0000 |
| Si | Si23 | 1.0 | 0.54260 | 0.65834 | 0.80656 | 1.0000 |
| Si | Si24 | 1.0 | 0.78513 | 0.28568 | 0.81188 | 1.0000 |
| Si | Si25 | 1.0 | 0.52647 | 0.27450 | 0.80811 | 1.0000 |
| Si | Si26 | 1.0 | 0.78987 | 0.04031 | 0.81383 | 1.0000 |
| Si | Si27 | 1.0 | 0.54167 | 0.03701 | 0.80227 | 1.0000 |
| Si | Si28 | 1.0 | 0.85288 | 0.47498 | 0.87955 | 1.0000 |
| Si | Si29 | 1.0 | 0.66591 | 0.79419 | 0.94166 | 1.0000 |
| Si | Si30 | 1.0 | 0.65836 | 0.53930 | 0.94556 | 1.0000 |
| Si | Si31 | 1.0 | 0.29973 | 0.80134 | 0.94637 | 1.0000 |
| Si | Si32 | 1.0 | 0.29358 | 0.54533 | 0.93814 | 1.0000 |
| Si | Si33 | 1.0 | 0.05530 | 0.80402 | 0.94799 | 1.0000 |
| Si | Si34 | 1.0 | 0.04804 | 0.54474 | 0.94371 | 1.0000 |
| Si | Si35 | 1.0 | 0.47456 | 0.85073 | 0.87121 | 1.0000 |
| Si | Si36 | 1.0 | 0.32828 | 0.20034 | 0.44463 | 1.0000 |
| Si | Si37 | 1.0 | 0.32979 | 0.45651 | 0.44307 | 1.0000 |
| Si | Si38 | 1.0 | 0.71673 | 0.21028 | 0.43789 | 1.0000 |
| Si | Si39 | 1.0 | 0.71294 | 0.46768 | 0.44678 | 1.0000 |
| Si | Si40 | 1.0 | 0.96318 | 0.21147 | 0.43791 | 1.0000 |
| Si | Si41 | 1.0 | 0.95810 | 0.46819 | 0.44875 | 1.0000 |
| Si | Si42 | 1.0 | 0.52068 | 0.14816 | 0.37435 | 1.0000 |
| Si | Si43 | 1.0 | 0.78146 | 0.34119 | 0.70004 | 1.0000 |
| Si | Si44 | 1.0 | 0.52806 | 0.34024 | 0.69512 | 1.0000 |
| Si | Si45 | 1.0 | 0.80652 | 0.71109 | 0.69527 | 1.0000 |
| Si | Si46 | 1.0 | 0.54988 | 0.71615 | 0.69340 | 1.0000 |

:

|    |      |     |         |         |         |        |
|----|------|-----|---------|---------|---------|--------|
| Si | Si47 | 1.0 | 0.56757 | 0.96437 | 0.68792 | 1.0000 |
| Si | Si48 | 1.0 | 0.86521 | 0.52204 | 0.62842 | 1.0000 |
| Si | Si49 | 1.0 | 0.21700 | 0.66813 | 0.18905 | 1.0000 |
| Si | Si50 | 1.0 | 0.47148 | 0.66842 | 0.19720 | 1.0000 |
| Si | Si51 | 1.0 | 0.20175 | 0.29143 | 0.19141 | 1.0000 |
| Si | Si52 | 1.0 | 0.45762 | 0.28937 | 0.19135 | 1.0000 |
| Si | Si53 | 1.0 | 0.19975 | 0.04602 | 0.19465 | 1.0000 |
| Si | Si54 | 1.0 | 0.45851 | 0.04479 | 0.19847 | 1.0000 |
| Si | Si55 | 1.0 | 0.14604 | 0.46930 | 0.11803 | 1.0000 |
| Si | Si56 | 1.0 | 0.13896 | 0.86053 | 0.12368 | 1.0000 |
| Si | Si57 | 1.0 | 0.52727 | 0.47315 | 0.12512 | 1.0000 |
| Si | Si58 | 1.0 | 0.46726 | 0.52915 | 0.62799 | 1.0000 |
| Si | Si59 | 1.0 | 0.14613 | 0.13426 | 0.36881 | 1.0000 |
| Si | Si60 | 1.0 | 0.53106 | 0.52621 | 0.37774 | 1.0000 |
| Si | Si61 | 1.0 | 0.86994 | 0.85875 | 0.88035 | 1.0000 |
| Si | Si62 | 1.0 | 0.47630 | 0.46432 | 0.87166 | 1.0000 |
| Si | Si63 | 1.0 | 0.81574 | 0.95622 | 0.70054 | 1.0000 |

RAI-T7T7T7T7T9T9

data\_image0

\_chemical\_formula\_structural H24O128Si58  
\_chemical\_formula\_sum "H24 O128 Si58"  
\_cell\_length\_a 12.6165  
\_cell\_length\_b 12.6093  
\_cell\_length\_c 25.0294  
\_cell\_angle\_alpha 89.9036  
\_cell\_angle\_beta 90.0713  
\_cell\_angle\_gamma 89.5884

\_space\_group\_name\_H-M\_alt "P 1"  
\_space\_group\_IT\_number 1

loop\_

\_space\_group\_symop\_operation\_xyz  
'x, y, z'

loop\_

\_atom\_site\_type\_symbol  
\_atom\_site\_label  
\_atom\_site\_symmetry\_multiplicity  
\_atom\_site\_fract\_x  
\_atom\_site\_fract\_y  
\_atom\_site\_fract\_z  
\_atom\_site\_occupancy  
H H1 1.0 0.97016 0.57834 0.62802 1.0000  
H H2 1.0 0.82149 0.63319 0.61163 1.0000  
H H3 1.0 0.76908 0.48613 0.62550 1.0000  
H H4 1.0 0.89907 0.45644 0.66608 1.0000  
H H5 1.0 0.54618 0.09990 0.58254 1.0000  
H H6 1.0 0.42177 0.03283 0.61968 1.0000  
H H7 1.0 0.36843 0.18093 0.63667 1.0000  
H H8 1.0 0.51667 0.23090 0.62307 1.0000

:

|   |     |     |         |         |         |        |
|---|-----|-----|---------|---------|---------|--------|
| H | H9  | 1.0 | 0.93062 | 0.02771 | 0.62664 | 1.0000 |
| H | H10 | 1.0 | 0.79141 | 0.08092 | 0.58976 | 1.0000 |
| H | H11 | 1.0 | 0.81910 | 0.21041 | 0.63342 | 1.0000 |
| H | H12 | 1.0 | 0.97017 | 0.17765 | 0.64294 | 1.0000 |
| H | H13 | 1.0 | 0.02713 | 0.93158 | 0.12007 | 1.0000 |
| H | H14 | 1.0 | 0.17681 | 0.97213 | 0.10401 | 1.0000 |
| H | H15 | 1.0 | 0.20996 | 0.82115 | 0.11361 | 1.0000 |
| H | H16 | 1.0 | 0.08065 | 0.79290 | 0.15691 | 1.0000 |
| H | H17 | 1.0 | 0.57766 | 0.97058 | 0.11968 | 1.0000 |
| H | H18 | 1.0 | 0.63300 | 0.82256 | 0.13620 | 1.0000 |
| H | H19 | 1.0 | 0.48517 | 0.77003 | 0.12238 | 1.0000 |
| H | H20 | 1.0 | 0.45594 | 0.89923 | 0.08137 | 1.0000 |
| H | H21 | 1.0 | 0.03103 | 0.42298 | 0.12809 | 1.0000 |
| H | H22 | 1.0 | 0.17991 | 0.37019 | 0.11137 | 1.0000 |
| H | H23 | 1.0 | 0.22940 | 0.51799 | 0.12463 | 1.0000 |
| H | H24 | 1.0 | 0.09786 | 0.54761 | 0.16502 | 1.0000 |
| O | O1  | 1.0 | 0.30841 | 0.67016 | 0.05428 | 1.0000 |
| O | O2  | 1.0 | 0.31372 | 0.83249 | 0.98442 | 1.0000 |
| O | O3  | 1.0 | 0.32128 | 0.49845 | 0.99212 | 1.0000 |
| O | O4  | 1.0 | 0.45585 | 0.52323 | 0.07220 | 1.0000 |
| O | O5  | 1.0 | 0.70040 | 0.68062 | 0.06893 | 1.0000 |
| O | O6  | 1.0 | 0.83659 | 0.83429 | 0.04630 | 1.0000 |
| O | O7  | 1.0 | 0.83219 | 0.51487 | 0.06311 | 1.0000 |
| O | O8  | 1.0 | 0.64734 | 0.49777 | 0.11247 | 1.0000 |
| O | O9  | 1.0 | 0.96374 | 0.67623 | 0.07992 | 1.0000 |
| O | O10 | 1.0 | 0.68877 | 0.33393 | 0.55418 | 1.0000 |
| O | O11 | 1.0 | 0.68784 | 0.17057 | 0.48515 | 1.0000 |
| O | O12 | 1.0 | 0.68182 | 0.50583 | 0.49184 | 1.0000 |
| O | O13 | 1.0 | 0.54448 | 0.48361 | 0.57089 | 1.0000 |
| O | O14 | 1.0 | 0.29843 | 0.32158 | 0.56835 | 1.0000 |
| O | O15 | 1.0 | 0.16476 | 0.16495 | 0.54638 | 1.0000 |
| O | O16 | 1.0 | 0.16800 | 0.48846 | 0.56338 | 1.0000 |
| O | O17 | 1.0 | 0.35359 | 0.50341 | 0.61217 | 1.0000 |
| O | O18 | 1.0 | 0.03828 | 0.32554 | 0.57879 | 1.0000 |

:

|   |     |     |         |         |         |        |
|---|-----|-----|---------|---------|---------|--------|
| O | O19 | 1.0 | 0.32618 | 0.37044 | 0.30729 | 1.0000 |
| O | O20 | 1.0 | 0.15818 | 0.35429 | 0.24304 | 1.0000 |
| O | O21 | 1.0 | 0.15394 | 0.27220 | 0.34208 | 1.0000 |
| O | O22 | 1.0 | 0.14474 | 0.47695 | 0.32735 | 1.0000 |
| O | O23 | 1.0 | 0.48810 | 0.34497 | 0.24018 | 1.0000 |
| O | O24 | 1.0 | 0.50244 | 0.27032 | 0.33786 | 1.0000 |
| O | O25 | 1.0 | 0.50587 | 0.47648 | 0.32129 | 1.0000 |
| O | O26 | 1.0 | 0.33975 | 0.72317 | 0.32015 | 1.0000 |
| O | O27 | 1.0 | 0.17826 | 0.85990 | 0.32491 | 1.0000 |
| O | O28 | 1.0 | 0.16074 | 0.67018 | 0.36759 | 1.0000 |
| O | O29 | 1.0 | 0.50026 | 0.85812 | 0.31583 | 1.0000 |
| O | O30 | 1.0 | 0.52393 | 0.66921 | 0.36151 | 1.0000 |
| O | O31 | 1.0 | 0.33683 | 0.99233 | 0.30099 | 1.0000 |
| O | O32 | 1.0 | 0.14921 | 0.06496 | 0.33079 | 1.0000 |
| O | O33 | 1.0 | 0.52716 | 0.06315 | 0.32421 | 1.0000 |
| O | O34 | 1.0 | 0.67369 | 0.63295 | 0.80788 | 1.0000 |
| O | O35 | 1.0 | 0.84155 | 0.64944 | 0.74365 | 1.0000 |
| O | O36 | 1.0 | 0.84680 | 0.73017 | 0.84267 | 1.0000 |
| O | O37 | 1.0 | 0.85482 | 0.52558 | 0.82777 | 1.0000 |
| O | O38 | 1.0 | 0.51214 | 0.65717 | 0.74012 | 1.0000 |
| O | O39 | 1.0 | 0.49614 | 0.73165 | 0.83768 | 1.0000 |
| O | O40 | 1.0 | 0.49425 | 0.52560 | 0.82108 | 1.0000 |
| O | O41 | 1.0 | 0.66078 | 0.27875 | 0.82092 | 1.0000 |
| O | O42 | 1.0 | 0.82271 | 0.14248 | 0.82494 | 1.0000 |
| O | O43 | 1.0 | 0.84017 | 0.33173 | 0.86820 | 1.0000 |
| O | O44 | 1.0 | 0.50012 | 0.14441 | 0.81513 | 1.0000 |
| O | O45 | 1.0 | 0.47581 | 0.33268 | 0.86113 | 1.0000 |
| O | O46 | 1.0 | 0.66415 | 0.01058 | 0.80068 | 1.0000 |
| O | O47 | 1.0 | 0.47394 | 0.93925 | 0.82365 | 1.0000 |
| O | O48 | 1.0 | 0.63872 | 0.67568 | 0.93875 | 1.0000 |
| O | O49 | 1.0 | 0.64814 | 0.84240 | 0.00445 | 1.0000 |
| O | O50 | 1.0 | 0.73008 | 0.85373 | 0.90597 | 1.0000 |
| O | O51 | 1.0 | 0.52519 | 0.85435 | 0.92012 | 1.0000 |
| O | O52 | 1.0 | 0.65462 | 0.51499 | 0.00749 | 1.0000 |

:



|   |     |     |         |         |         |        |
|---|-----|-----|---------|---------|---------|--------|
| O | O53 | 1.0 | 0.73389 | 0.49489 | 0.91107 | 1.0000 |
| O | O54 | 1.0 | 0.52714 | 0.49829 | 0.92495 | 1.0000 |
| O | O55 | 1.0 | 0.28070 | 0.66051 | 0.92675 | 1.0000 |
| O | O56 | 1.0 | 0.14269 | 0.82128 | 0.92221 | 1.0000 |
| O | O57 | 1.0 | 0.33212 | 0.83967 | 0.87901 | 1.0000 |
| O | O58 | 1.0 | 0.14549 | 0.50067 | 0.93315 | 1.0000 |
| O | O59 | 1.0 | 0.33308 | 0.47428 | 0.88722 | 1.0000 |
| O | O60 | 1.0 | 0.00953 | 0.66354 | 0.94626 | 1.0000 |
| O | O61 | 1.0 | 0.93784 | 0.85173 | 0.91627 | 1.0000 |
| O | O62 | 1.0 | 0.94158 | 0.47204 | 0.92338 | 1.0000 |
| O | O63 | 1.0 | 0.36300 | 0.32631 | 0.43917 | 1.0000 |
| O | O64 | 1.0 | 0.35371 | 0.15971 | 0.50512 | 1.0000 |
| O | O65 | 1.0 | 0.26984 | 0.14957 | 0.40670 | 1.0000 |
| O | O66 | 1.0 | 0.47508 | 0.14708 | 0.42053 | 1.0000 |
| O | O67 | 1.0 | 0.34448 | 0.48752 | 0.50707 | 1.0000 |
| O | O68 | 1.0 | 0.26854 | 0.50672 | 0.40976 | 1.0000 |
| O | O69 | 1.0 | 0.47474 | 0.50319 | 0.42545 | 1.0000 |
| O | O70 | 1.0 | 0.72103 | 0.34272 | 0.42745 | 1.0000 |
| O | O71 | 1.0 | 0.85764 | 0.18123 | 0.42233 | 1.0000 |
| O | O72 | 1.0 | 0.66773 | 0.16428 | 0.37960 | 1.0000 |
| O | O73 | 1.0 | 0.85642 | 0.50291 | 0.43219 | 1.0000 |
| O | O74 | 1.0 | 0.66791 | 0.52809 | 0.38681 | 1.0000 |
| O | O75 | 1.0 | 0.99063 | 0.33908 | 0.44628 | 1.0000 |
| O | O76 | 1.0 | 0.06214 | 0.15143 | 0.41569 | 1.0000 |
| O | O77 | 1.0 | 0.06124 | 0.52971 | 0.42372 | 1.0000 |
| O | O78 | 1.0 | 0.66882 | 0.31105 | 0.69302 | 1.0000 |
| O | O79 | 1.0 | 0.83152 | 0.31390 | 0.76279 | 1.0000 |
| O | O80 | 1.0 | 0.49832 | 0.32011 | 0.75601 | 1.0000 |
| O | O81 | 1.0 | 0.51945 | 0.45666 | 0.67614 | 1.0000 |
| O | O82 | 1.0 | 0.67930 | 0.69974 | 0.67922 | 1.0000 |
| O | O83 | 1.0 | 0.83231 | 0.83716 | 0.70090 | 1.0000 |
| O | O84 | 1.0 | 0.51477 | 0.83350 | 0.68371 | 1.0000 |
| O | O85 | 1.0 | 0.49673 | 0.64808 | 0.63511 | 1.0000 |
| O | O86 | 1.0 | 0.67553 | 0.96590 | 0.66716 | 1.0000 |

:

|   |      |     |         |         |         |        |
|---|------|-----|---------|---------|---------|--------|
| O | O87  | 1.0 | 0.33255 | 0.68880 | 0.19320 | 1.0000 |
| O | O88  | 1.0 | 0.16851 | 0.68981 | 0.26202 | 1.0000 |
| O | O89  | 1.0 | 0.50326 | 0.68363 | 0.25626 | 1.0000 |
| O | O90  | 1.0 | 0.48404 | 0.54566 | 0.17743 | 1.0000 |
| O | O91  | 1.0 | 0.32064 | 0.30034 | 0.17985 | 1.0000 |
| O | O92  | 1.0 | 0.16450 | 0.16585 | 0.20098 | 1.0000 |
| O | O93  | 1.0 | 0.48718 | 0.16910 | 0.18340 | 1.0000 |
| O | O94  | 1.0 | 0.50161 | 0.35533 | 0.13505 | 1.0000 |
| O | O95  | 1.0 | 0.32461 | 0.03879 | 0.16846 | 1.0000 |
| O | O96  | 1.0 | 0.03106 | 0.82675 | 0.01213 | 1.0000 |
| O | O97  | 1.0 | 0.02324 | 0.51106 | 0.01955 | 1.0000 |
| O | O98  | 1.0 | 0.97085 | 0.17476 | 0.51186 | 1.0000 |
| O | O99  | 1.0 | 0.97716 | 0.49169 | 0.51933 | 1.0000 |
| O | O100 | 1.0 | 0.17316 | 0.97173 | 0.23511 | 1.0000 |
| O | O101 | 1.0 | 0.49033 | 0.97893 | 0.22852 | 1.0000 |
| O | O102 | 1.0 | 0.82711 | 0.03168 | 0.73473 | 1.0000 |
| O | O103 | 1.0 | 0.51063 | 0.02396 | 0.72803 | 1.0000 |
| O | O104 | 1.0 | 0.85201 | 0.93735 | 0.83034 | 1.0000 |
| O | O105 | 1.0 | 0.49513 | 0.00316 | 0.62065 | 1.0000 |
| O | O106 | 1.0 | 0.86129 | 0.99065 | 0.62820 | 1.0000 |
| O | O107 | 1.0 | 0.74940 | 0.52246 | 0.59095 | 1.0000 |
| O | O108 | 1.0 | 0.99841 | 0.50459 | 0.62668 | 1.0000 |
| O | O109 | 1.0 | 0.82520 | 0.44424 | 0.67890 | 1.0000 |
| O | O110 | 1.0 | 0.86872 | 0.67221 | 0.63660 | 1.0000 |
| O | O111 | 1.0 | 0.56024 | 0.17388 | 0.56993 | 1.0000 |
| O | O112 | 1.0 | 0.32894 | 0.13326 | 0.61206 | 1.0000 |
| O | O113 | 1.0 | 0.47947 | 0.25191 | 0.65699 | 1.0000 |
| O | O114 | 1.0 | 0.77239 | 0.15643 | 0.58302 | 1.0000 |
| O | O115 | 1.0 | 0.01233 | 0.13366 | 0.61729 | 1.0000 |
| O | O116 | 1.0 | 0.85851 | 0.23509 | 0.66628 | 1.0000 |
| O | O117 | 1.0 | 0.23451 | 0.86062 | 0.08073 | 1.0000 |
| O | O118 | 1.0 | 0.99065 | 0.86191 | 0.11860 | 1.0000 |
| O | O119 | 1.0 | 0.15604 | 0.77381 | 0.16398 | 1.0000 |
| O | O120 | 1.0 | 0.13271 | 0.01403 | 0.12972 | 1.0000 |

:

|    |      |     |         |         |         |        |
|----|------|-----|---------|---------|---------|--------|
| O  | O121 | 1.0 | 0.44344 | 0.82537 | 0.06856 | 1.0000 |
| O  | O122 | 1.0 | 0.67216 | 0.86984 | 0.11131 | 1.0000 |
| O  | O123 | 1.0 | 0.52112 | 0.75088 | 0.15706 | 1.0000 |
| O  | O124 | 1.0 | 0.50376 | 0.99838 | 0.12100 | 1.0000 |
| O  | O125 | 1.0 | 0.25129 | 0.48062 | 0.09088 | 1.0000 |
| O  | O126 | 1.0 | 0.00100 | 0.49621 | 0.12691 | 1.0000 |
| O  | O127 | 1.0 | 0.17183 | 0.56148 | 0.17760 | 1.0000 |
| O  | O128 | 1.0 | 0.13223 | 0.33085 | 0.13603 | 1.0000 |
| Si | Si1  | 1.0 | 0.33431 | 0.54327 | 0.05237 | 1.0000 |
| Si | Si2  | 1.0 | 0.71329 | 0.80663 | 0.05779 | 1.0000 |
| Si | Si3  | 1.0 | 0.70925 | 0.55296 | 0.06290 | 1.0000 |
| Si | Si4  | 1.0 | 0.95629 | 0.80122 | 0.06382 | 1.0000 |
| Si | Si5  | 1.0 | 0.95504 | 0.54884 | 0.07171 | 1.0000 |
| Si | Si6  | 1.0 | 0.67665 | 0.20684 | 0.54700 | 1.0000 |
| Si | Si7  | 1.0 | 0.66614 | 0.46148 | 0.55204 | 1.0000 |
| Si | Si8  | 1.0 | 0.28742 | 0.19517 | 0.55807 | 1.0000 |
| Si | Si9  | 1.0 | 0.29060 | 0.44943 | 0.56264 | 1.0000 |
| Si | Si10 | 1.0 | 0.04569 | 0.20020 | 0.56366 | 1.0000 |
| Si | Si11 | 1.0 | 0.04535 | 0.45323 | 0.57159 | 1.0000 |
| Si | Si12 | 1.0 | 0.19710 | 0.36766 | 0.30462 | 1.0000 |
| Si | Si13 | 1.0 | 0.45457 | 0.36543 | 0.30160 | 1.0000 |
| Si | Si14 | 1.0 | 0.21208 | 0.73624 | 0.31856 | 1.0000 |
| Si | Si15 | 1.0 | 0.46679 | 0.73401 | 0.31319 | 1.0000 |
| Si | Si16 | 1.0 | 0.20951 | 0.97251 | 0.29781 | 1.0000 |
| Si | Si17 | 1.0 | 0.46327 | 0.97274 | 0.29228 | 1.0000 |
| Si | Si18 | 1.0 | 0.15820 | 0.54465 | 0.38249 | 1.0000 |
| Si | Si19 | 1.0 | 0.80282 | 0.63527 | 0.80515 | 1.0000 |
| Si | Si20 | 1.0 | 0.54525 | 0.63707 | 0.80171 | 1.0000 |
| Si | Si21 | 1.0 | 0.78857 | 0.26626 | 0.81905 | 1.0000 |
| Si | Si22 | 1.0 | 0.53388 | 0.26853 | 0.81303 | 1.0000 |
| Si | Si23 | 1.0 | 0.53769 | 0.02998 | 0.79184 | 1.0000 |
| Si | Si24 | 1.0 | 0.84317 | 0.45724 | 0.88290 | 1.0000 |
| Si | Si25 | 1.0 | 0.63608 | 0.80492 | 0.94263 | 1.0000 |
| Si | Si26 | 1.0 | 0.63872 | 0.54717 | 0.94544 | 1.0000 |

:

|    |      |     |         |         |         |        |
|----|------|-----|---------|---------|---------|--------|
| Si | Si27 | 1.0 | 0.26669 | 0.78826 | 0.92830 | 1.0000 |
| Si | Si28 | 1.0 | 0.26963 | 0.53369 | 0.93510 | 1.0000 |
| Si | Si29 | 1.0 | 0.03011 | 0.79083 | 0.94934 | 1.0000 |
| Si | Si30 | 1.0 | 0.03035 | 0.53735 | 0.95568 | 1.0000 |
| Si | Si31 | 1.0 | 0.45785 | 0.84193 | 0.86472 | 1.0000 |
| Si | Si32 | 1.0 | 0.36474 | 0.19718 | 0.44318 | 1.0000 |
| Si | Si33 | 1.0 | 0.36253 | 0.45479 | 0.44534 | 1.0000 |
| Si | Si34 | 1.0 | 0.73404 | 0.21493 | 0.42872 | 1.0000 |
| Si | Si35 | 1.0 | 0.73235 | 0.46970 | 0.43485 | 1.0000 |
| Si | Si36 | 1.0 | 0.97057 | 0.21173 | 0.44922 | 1.0000 |
| Si | Si37 | 1.0 | 0.97095 | 0.46540 | 0.45552 | 1.0000 |
| Si | Si38 | 1.0 | 0.54204 | 0.16061 | 0.36517 | 1.0000 |
| Si | Si39 | 1.0 | 0.54166 | 0.33508 | 0.69559 | 1.0000 |
| Si | Si40 | 1.0 | 0.80528 | 0.71350 | 0.69003 | 1.0000 |
| Si | Si41 | 1.0 | 0.55169 | 0.71027 | 0.68463 | 1.0000 |
| Si | Si42 | 1.0 | 0.54833 | 0.95657 | 0.67557 | 1.0000 |
| Si | Si43 | 1.0 | 0.46019 | 0.66732 | 0.19588 | 1.0000 |
| Si | Si44 | 1.0 | 0.19425 | 0.28889 | 0.18989 | 1.0000 |
| Si | Si45 | 1.0 | 0.44852 | 0.29183 | 0.18469 | 1.0000 |
| Si | Si46 | 1.0 | 0.45222 | 0.04615 | 0.17586 | 1.0000 |
| Si | Si47 | 1.0 | 0.52177 | 0.48090 | 0.12426 | 1.0000 |
| Si | Si48 | 1.0 | 0.47900 | 0.52247 | 0.62361 | 1.0000 |
| Si | Si49 | 1.0 | 0.15943 | 0.16019 | 0.37381 | 1.0000 |
| Si | Si50 | 1.0 | 0.54226 | 0.54354 | 0.37381 | 1.0000 |
| Si | Si51 | 1.0 | 0.45838 | 0.45831 | 0.87368 | 1.0000 |
| Si | Si52 | 1.0 | 0.79608 | 0.32528 | 0.70082 | 1.0000 |
| Si | Si53 | 1.0 | 0.32446 | 0.79730 | 0.04646 | 1.0000 |
| Si | Si54 | 1.0 | 0.20538 | 0.67800 | 0.20030 | 1.0000 |
| Si | Si55 | 1.0 | 0.79150 | 0.03034 | 0.79756 | 1.0000 |
| Si | Si56 | 1.0 | 0.84118 | 0.84261 | 0.87384 | 1.0000 |
| Si | Si57 | 1.0 | 0.19925 | 0.04677 | 0.18342 | 1.0000 |
| Si | Si58 | 1.0 | 0.80055 | 0.95706 | 0.68309 | 1.0000 |

RAI-T1T1T7T7T7T7T9T9

data\_image0

\_chemical\_formula\_structural H32O128Si56  
\_chemical\_formula\_sum "H32 O128 Si56"  
\_cell\_length\_a 12.5316  
\_cell\_length\_b 12.5105  
\_cell\_length\_c 25.3677  
\_cell\_angle\_alpha 90.0341  
\_cell\_angle\_beta 89.9181  
\_cell\_angle\_gamma 89.3467

\_space\_group\_name\_H-M\_alt "P 1"  
\_space\_group\_IT\_number 1

loop\_

\_space\_group\_symop\_operation\_xyz  
'x, y, z'

loop\_

\_atom\_site\_type\_symbol  
\_atom\_site\_label  
\_atom\_site\_symmetry\_multiplicity  
\_atom\_site\_fract\_x  
\_atom\_site\_fract\_y  
\_atom\_site\_fract\_z  
\_atom\_site\_occupancy  
H H1 1.0 0.02654 0.93682 0.11622 1.0000  
H H2 1.0 0.17795 0.96534 0.09960 1.0000  
H H3 1.0 0.20047 0.81168 0.11253 1.0000  
H H4 1.0 0.06944 0.78090 0.15738 1.0000  
H H5 1.0 0.58840 0.97459 0.11726 1.0000  
H H6 1.0 0.63553 0.82330 0.13706 1.0000  
H H7 1.0 0.48608 0.78055 0.12629 1.0000  
H H8 1.0 0.45635 0.90753 0.08262 1.0000

:

|   |     |     |         |         |         |        |
|---|-----|-----|---------|---------|---------|--------|
| H | H9  | 1.0 | 0.03409 | 0.42381 | 0.12471 | 1.0000 |
| H | H10 | 1.0 | 0.18269 | 0.36317 | 0.11126 | 1.0000 |
| H | H11 | 1.0 | 0.23682 | 0.51130 | 0.12255 | 1.0000 |
| H | H12 | 1.0 | 0.10584 | 0.54143 | 0.16177 | 1.0000 |
| H | H13 | 1.0 | 0.96788 | 0.58387 | 0.62530 | 1.0000 |
| H | H14 | 1.0 | 0.82027 | 0.64628 | 0.61124 | 1.0000 |
| H | H15 | 1.0 | 0.76351 | 0.49847 | 0.62304 | 1.0000 |
| H | H16 | 1.0 | 0.89324 | 0.46693 | 0.66203 | 1.0000 |
| H | H17 | 1.0 | 0.54724 | 0.09788 | 0.58300 | 1.0000 |
| H | H18 | 1.0 | 0.41347 | 0.03333 | 0.61759 | 1.0000 |
| H | H19 | 1.0 | 0.36715 | 0.18520 | 0.63704 | 1.0000 |
| H | H20 | 1.0 | 0.51666 | 0.22566 | 0.62684 | 1.0000 |
| H | H21 | 1.0 | 0.92870 | 0.02881 | 0.62048 | 1.0000 |
| H | H22 | 1.0 | 0.79728 | 0.09066 | 0.58774 | 1.0000 |
| H | H23 | 1.0 | 0.82820 | 0.22158 | 0.63394 | 1.0000 |
| H | H24 | 1.0 | 0.97775 | 0.18077 | 0.64016 | 1.0000 |
| H | H25 | 1.0 | 0.26285 | 0.02448 | 0.34249 | 1.0000 |
| H | H26 | 1.0 | 0.15264 | 0.89931 | 0.34696 | 1.0000 |
| H | H27 | 1.0 | 0.29164 | 0.97715 | 0.26739 | 1.0000 |
| H | H28 | 1.0 | 0.13440 | 0.93579 | 0.24265 | 1.0000 |
| H | H29 | 1.0 | 0.86560 | 0.07949 | 0.74033 | 1.0000 |
| H | H30 | 1.0 | 0.85057 | 0.10848 | 0.84512 | 1.0000 |
| H | H31 | 1.0 | 0.74029 | 0.98245 | 0.84206 | 1.0000 |
| H | H32 | 1.0 | 0.71130 | 0.03040 | 0.76716 | 1.0000 |
| O | O1  | 1.0 | 0.31651 | 0.66761 | 0.05521 | 1.0000 |
| O | O2  | 1.0 | 0.32308 | 0.83510 | 0.98834 | 1.0000 |
| O | O3  | 1.0 | 0.32897 | 0.49879 | 0.99116 | 1.0000 |
| O | O4  | 1.0 | 0.46252 | 0.51813 | 0.07168 | 1.0000 |
| O | O5  | 1.0 | 0.70040 | 0.67952 | 0.06689 | 1.0000 |
| O | O6  | 1.0 | 0.83299 | 0.83647 | 0.04334 | 1.0000 |
| O | O7  | 1.0 | 0.83797 | 0.51463 | 0.06245 | 1.0000 |
| O | O8  | 1.0 | 0.65356 | 0.49765 | 0.11319 | 1.0000 |
| O | O9  | 1.0 | 0.96495 | 0.68110 | 0.07799 | 1.0000 |
| O | O10 | 1.0 | 0.68478 | 0.34111 | 0.55537 | 1.0000 |

:

|   |     |     |         |         |         |        |
|---|-----|-----|---------|---------|---------|--------|
| O | O11 | 1.0 | 0.67918 | 0.17374 | 0.48863 | 1.0000 |
| O | O12 | 1.0 | 0.67125 | 0.51030 | 0.49166 | 1.0000 |
| O | O13 | 1.0 | 0.53845 | 0.48901 | 0.57270 | 1.0000 |
| O | O14 | 1.0 | 0.29839 | 0.32796 | 0.56674 | 1.0000 |
| O | O15 | 1.0 | 0.16857 | 0.16791 | 0.54402 | 1.0000 |
| O | O16 | 1.0 | 0.16315 | 0.49434 | 0.56262 | 1.0000 |
| O | O17 | 1.0 | 0.34706 | 0.50942 | 0.61358 | 1.0000 |
| O | O18 | 1.0 | 0.03644 | 0.32727 | 0.57623 | 1.0000 |
| O | O19 | 1.0 | 0.32106 | 0.35722 | 0.30920 | 1.0000 |
| O | O20 | 1.0 | 0.15525 | 0.34693 | 0.24274 | 1.0000 |
| O | O21 | 1.0 | 0.15654 | 0.23091 | 0.32989 | 1.0000 |
| O | O22 | 1.0 | 0.13228 | 0.44460 | 0.33383 | 1.0000 |
| O | O23 | 1.0 | 0.48457 | 0.35299 | 0.24257 | 1.0000 |
| O | O24 | 1.0 | 0.50959 | 0.27793 | 0.33912 | 1.0000 |
| O | O25 | 1.0 | 0.48824 | 0.48358 | 0.32498 | 1.0000 |
| O | O26 | 1.0 | 0.33499 | 0.75260 | 0.31914 | 1.0000 |
| O | O27 | 1.0 | 0.18124 | 0.64421 | 0.36353 | 1.0000 |
| O | O28 | 1.0 | 0.51008 | 0.86531 | 0.31060 | 1.0000 |
| O | O29 | 1.0 | 0.52094 | 0.68024 | 0.35862 | 1.0000 |
| O | O30 | 1.0 | 0.53303 | 0.07157 | 0.31848 | 1.0000 |
| O | O31 | 1.0 | 0.68139 | 0.65355 | 0.80958 | 1.0000 |
| O | O32 | 1.0 | 0.84725 | 0.66178 | 0.74285 | 1.0000 |
| O | O33 | 1.0 | 0.84912 | 0.77579 | 0.83065 | 1.0000 |
| O | O34 | 1.0 | 0.86884 | 0.56168 | 0.83321 | 1.0000 |
| O | O35 | 1.0 | 0.51778 | 0.65590 | 0.74332 | 1.0000 |
| O | O36 | 1.0 | 0.49105 | 0.72805 | 0.84023 | 1.0000 |
| O | O37 | 1.0 | 0.51582 | 0.52338 | 0.82506 | 1.0000 |
| O | O38 | 1.0 | 0.66701 | 0.25487 | 0.81998 | 1.0000 |
| O | O39 | 1.0 | 0.82264 | 0.36183 | 0.86383 | 1.0000 |
| O | O40 | 1.0 | 0.49301 | 0.14074 | 0.81107 | 1.0000 |
| O | O41 | 1.0 | 0.48022 | 0.32703 | 0.85873 | 1.0000 |
| O | O42 | 1.0 | 0.47065 | 0.93386 | 0.81760 | 1.0000 |
| O | O43 | 1.0 | 0.59517 | 0.67172 | 0.94912 | 1.0000 |
| O | O44 | 1.0 | 0.63744 | 0.84447 | 0.00703 | 1.0000 |

:

|   |     |     |         |         |         |        |
|---|-----|-----|---------|---------|---------|--------|
| O | O45 | 1.0 | 0.74981 | 0.79905 | 0.92095 | 1.0000 |
| O | O46 | 1.0 | 0.54753 | 0.86766 | 0.91241 | 1.0000 |
| O | O47 | 1.0 | 0.66046 | 0.50712 | 0.00877 | 1.0000 |
| O | O48 | 1.0 | 0.74247 | 0.53322 | 0.91396 | 1.0000 |
| O | O49 | 1.0 | 0.54029 | 0.47406 | 0.92669 | 1.0000 |
| O | O50 | 1.0 | 0.29068 | 0.66546 | 0.92850 | 1.0000 |
| O | O51 | 1.0 | 0.15213 | 0.82875 | 0.92595 | 1.0000 |
| O | O52 | 1.0 | 0.34229 | 0.85020 | 0.88507 | 1.0000 |
| O | O53 | 1.0 | 0.15346 | 0.50588 | 0.93203 | 1.0000 |
| O | O54 | 1.0 | 0.34459 | 0.47921 | 0.88714 | 1.0000 |
| O | O55 | 1.0 | 0.01504 | 0.67025 | 0.94411 | 1.0000 |
| O | O56 | 1.0 | 0.94932 | 0.86281 | 0.91358 | 1.0000 |
| O | O57 | 1.0 | 0.94710 | 0.47656 | 0.92217 | 1.0000 |
| O | O58 | 1.0 | 0.40693 | 0.33583 | 0.44910 | 1.0000 |
| O | O59 | 1.0 | 0.36442 | 0.16355 | 0.50731 | 1.0000 |
| O | O60 | 1.0 | 0.25159 | 0.20879 | 0.42156 | 1.0000 |
| O | O61 | 1.0 | 0.45380 | 0.14004 | 0.41241 | 1.0000 |
| O | O62 | 1.0 | 0.34152 | 0.50009 | 0.50910 | 1.0000 |
| O | O63 | 1.0 | 0.25810 | 0.47319 | 0.41474 | 1.0000 |
| O | O64 | 1.0 | 0.46031 | 0.53358 | 0.42645 | 1.0000 |
| O | O65 | 1.0 | 0.71087 | 0.34374 | 0.42902 | 1.0000 |
| O | O66 | 1.0 | 0.84959 | 0.18066 | 0.42573 | 1.0000 |
| O | O67 | 1.0 | 0.65916 | 0.15925 | 0.38542 | 1.0000 |
| O | O68 | 1.0 | 0.84765 | 0.50346 | 0.43267 | 1.0000 |
| O | O69 | 1.0 | 0.65716 | 0.52960 | 0.38763 | 1.0000 |
| O | O70 | 1.0 | 0.98600 | 0.33910 | 0.44475 | 1.0000 |
| O | O71 | 1.0 | 0.05204 | 0.14731 | 0.41219 | 1.0000 |
| O | O72 | 1.0 | 0.05402 | 0.53247 | 0.42218 | 1.0000 |
| O | O73 | 1.0 | 0.66965 | 0.31312 | 0.68782 | 1.0000 |
| O | O74 | 1.0 | 0.82465 | 0.33151 | 0.76084 | 1.0000 |
| O | O75 | 1.0 | 0.50885 | 0.32215 | 0.75655 | 1.0000 |
| O | O76 | 1.0 | 0.51271 | 0.45635 | 0.67669 | 1.0000 |
| O | O77 | 1.0 | 0.68043 | 0.70560 | 0.68052 | 1.0000 |
| O | O78 | 1.0 | 0.83196 | 0.84971 | 0.69920 | 1.0000 |

:



|   |      |     |         |         |         |        |
|---|------|-----|---------|---------|---------|--------|
| O | O79  | 1.0 | 0.51061 | 0.83403 | 0.68680 | 1.0000 |
| O | O80  | 1.0 | 0.49444 | 0.64998 | 0.63936 | 1.0000 |
| O | O81  | 1.0 | 0.66854 | 0.96488 | 0.65986 | 1.0000 |
| O | O82  | 1.0 | 0.33121 | 0.69504 | 0.18852 | 1.0000 |
| O | O83  | 1.0 | 0.17467 | 0.67894 | 0.26083 | 1.0000 |
| O | O84  | 1.0 | 0.49314 | 0.68348 | 0.25625 | 1.0000 |
| O | O85  | 1.0 | 0.48621 | 0.55105 | 0.17553 | 1.0000 |
| O | O86  | 1.0 | 0.32177 | 0.30027 | 0.18071 | 1.0000 |
| O | O87  | 1.0 | 0.16740 | 0.15895 | 0.19879 | 1.0000 |
| O | O88  | 1.0 | 0.49314 | 0.17380 | 0.18681 | 1.0000 |
| O | O89  | 1.0 | 0.50610 | 0.35722 | 0.13839 | 1.0000 |
| O | O90  | 1.0 | 0.33440 | 0.04271 | 0.16204 | 1.0000 |
| O | O91  | 1.0 | 0.02979 | 0.83342 | 0.01096 | 1.0000 |
| O | O92  | 1.0 | 0.02889 | 0.51758 | 0.01693 | 1.0000 |
| O | O93  | 1.0 | 0.97333 | 0.17329 | 0.51007 | 1.0000 |
| O | O94  | 1.0 | 0.97233 | 0.49285 | 0.51725 | 1.0000 |
| O | O95  | 1.0 | 0.49953 | 0.97927 | 0.22327 | 1.0000 |
| O | O96  | 1.0 | 0.50509 | 0.02865 | 0.72293 | 1.0000 |
| O | O97  | 1.0 | 0.22649 | 0.85151 | 0.08051 | 1.0000 |
| O | O98  | 1.0 | 0.98541 | 0.86960 | 0.11552 | 1.0000 |
| O | O99  | 1.0 | 0.14540 | 0.76457 | 0.16366 | 1.0000 |
| O | O100 | 1.0 | 0.13898 | 0.01730 | 0.12330 | 1.0000 |
| O | O101 | 1.0 | 0.44080 | 0.83119 | 0.07475 | 1.0000 |
| O | O102 | 1.0 | 0.67531 | 0.86935 | 0.11187 | 1.0000 |
| O | O103 | 1.0 | 0.52411 | 0.75820 | 0.15969 | 1.0000 |
| O | O104 | 1.0 | 0.51696 | 0.01052 | 0.11780 | 1.0000 |
| O | O105 | 1.0 | 0.25623 | 0.47533 | 0.08839 | 1.0000 |
| O | O106 | 1.0 | 0.00968 | 0.49957 | 0.12293 | 1.0000 |
| O | O107 | 1.0 | 0.17910 | 0.55362 | 0.17630 | 1.0000 |
| O | O108 | 1.0 | 0.13353 | 0.32729 | 0.13623 | 1.0000 |
| O | O109 | 1.0 | 0.48456 | 0.99660 | 0.61769 | 1.0000 |
| O | O110 | 1.0 | 0.85874 | 0.99147 | 0.62134 | 1.0000 |
| O | O111 | 1.0 | 0.74465 | 0.53384 | 0.58856 | 1.0000 |
| O | O112 | 1.0 | 0.99139 | 0.50791 | 0.62324 | 1.0000 |

:

|    |      |     |         |         |         |        |
|----|------|-----|---------|---------|---------|--------|
| O  | O113 | 1.0 | 0.81956 | 0.45609 | 0.67624 | 1.0000 |
| O  | O114 | 1.0 | 0.86918 | 0.68215 | 0.63629 | 1.0000 |
| O  | O115 | 1.0 | 0.56421 | 0.17421 | 0.57583 | 1.0000 |
| O  | O116 | 1.0 | 0.32682 | 0.13881 | 0.61216 | 1.0000 |
| O  | O117 | 1.0 | 0.47703 | 0.24935 | 0.65961 | 1.0000 |
| O  | O118 | 1.0 | 0.77986 | 0.16770 | 0.58212 | 1.0000 |
| O  | O119 | 1.0 | 0.01409 | 0.13368 | 0.61386 | 1.0000 |
| O  | O120 | 1.0 | 0.86693 | 0.24738 | 0.66630 | 1.0000 |
| O  | O121 | 1.0 | 0.13676 | 0.84003 | 0.32264 | 1.0000 |
| O  | O122 | 1.0 | 0.34396 | 0.00346 | 0.29424 | 1.0000 |
| O  | O123 | 1.0 | 0.19910 | 0.03191 | 0.36627 | 1.0000 |
| O  | O124 | 1.0 | 0.19954 | 0.95567 | 0.22432 | 1.0000 |
| O  | O125 | 1.0 | 0.86508 | 0.16753 | 0.82047 | 1.0000 |
| O  | O126 | 1.0 | 0.65945 | 0.00252 | 0.79378 | 1.0000 |
| O  | O127 | 1.0 | 0.80389 | 0.97571 | 0.86584 | 1.0000 |
| O  | O128 | 1.0 | 0.80143 | 0.05467 | 0.72271 | 1.0000 |
| Si | Si1  | 1.0 | 0.34092 | 0.53950 | 0.05148 | 1.0000 |
| Si | Si2  | 1.0 | 0.71034 | 0.80728 | 0.05739 | 1.0000 |
| Si | Si3  | 1.0 | 0.71352 | 0.55066 | 0.06281 | 1.0000 |
| Si | Si4  | 1.0 | 0.95400 | 0.80677 | 0.06149 | 1.0000 |
| Si | Si5  | 1.0 | 0.96051 | 0.55271 | 0.06911 | 1.0000 |
| Si | Si6  | 1.0 | 0.67654 | 0.21281 | 0.54959 | 1.0000 |
| Si | Si7  | 1.0 | 0.66005 | 0.46921 | 0.55202 | 1.0000 |
| Si | Si8  | 1.0 | 0.29081 | 0.19985 | 0.55770 | 1.0000 |
| Si | Si9  | 1.0 | 0.28726 | 0.45706 | 0.56303 | 1.0000 |
| Si | Si10 | 1.0 | 0.04768 | 0.20133 | 0.56082 | 1.0000 |
| Si | Si11 | 1.0 | 0.04054 | 0.45611 | 0.56912 | 1.0000 |
| Si | Si12 | 1.0 | 0.19191 | 0.34472 | 0.30440 | 1.0000 |
| Si | Si13 | 1.0 | 0.44978 | 0.36776 | 0.30375 | 1.0000 |
| Si | Si14 | 1.0 | 0.46331 | 0.74490 | 0.31098 | 1.0000 |
| Si | Si15 | 1.0 | 0.47202 | 0.97944 | 0.28627 | 1.0000 |
| Si | Si16 | 1.0 | 0.15683 | 0.52408 | 0.38337 | 1.0000 |
| Si | Si17 | 1.0 | 0.81093 | 0.66338 | 0.80464 | 1.0000 |
| Si | Si18 | 1.0 | 0.55291 | 0.64018 | 0.80432 | 1.0000 |

:

|    |      |     |         |         |         |        |
|----|------|-----|---------|---------|---------|--------|
| Si | Si19 | 1.0 | 0.53882 | 0.26168 | 0.81141 | 1.0000 |
| Si | Si20 | 1.0 | 0.53142 | 0.02716 | 0.78606 | 1.0000 |
| Si | Si21 | 1.0 | 0.84485 | 0.48290 | 0.88309 | 1.0000 |
| Si | Si22 | 1.0 | 0.63194 | 0.79662 | 0.94715 | 1.0000 |
| Si | Si23 | 1.0 | 0.63549 | 0.54705 | 0.94938 | 1.0000 |
| Si | Si24 | 1.0 | 0.27624 | 0.79410 | 0.93211 | 1.0000 |
| Si | Si25 | 1.0 | 0.27907 | 0.53721 | 0.93483 | 1.0000 |
| Si | Si26 | 1.0 | 0.03566 | 0.79836 | 0.94894 | 1.0000 |
| Si | Si27 | 1.0 | 0.03657 | 0.54301 | 0.95379 | 1.0000 |
| Si | Si28 | 1.0 | 0.46439 | 0.84551 | 0.86385 | 1.0000 |
| Si | Si29 | 1.0 | 0.36970 | 0.21109 | 0.44739 | 1.0000 |
| Si | Si30 | 1.0 | 0.36571 | 0.46022 | 0.44958 | 1.0000 |
| Si | Si31 | 1.0 | 0.72546 | 0.21524 | 0.43228 | 1.0000 |
| Si | Si32 | 1.0 | 0.72213 | 0.47197 | 0.43545 | 1.0000 |
| Si | Si33 | 1.0 | 0.96622 | 0.21070 | 0.44843 | 1.0000 |
| Si | Si34 | 1.0 | 0.96457 | 0.46654 | 0.45424 | 1.0000 |
| Si | Si35 | 1.0 | 0.53740 | 0.16181 | 0.36388 | 1.0000 |
| Si | Si36 | 1.0 | 0.54198 | 0.33512 | 0.69537 | 1.0000 |
| Si | Si37 | 1.0 | 0.80708 | 0.72336 | 0.68986 | 1.0000 |
| Si | Si38 | 1.0 | 0.55190 | 0.71099 | 0.68790 | 1.0000 |
| Si | Si39 | 1.0 | 0.54111 | 0.95605 | 0.67215 | 1.0000 |
| Si | Si40 | 1.0 | 0.45905 | 0.67211 | 0.19515 | 1.0000 |
| Si | Si41 | 1.0 | 0.19467 | 0.28470 | 0.18968 | 1.0000 |
| Si | Si42 | 1.0 | 0.45041 | 0.29639 | 0.18752 | 1.0000 |
| Si | Si43 | 1.0 | 0.46210 | 0.05150 | 0.17268 | 1.0000 |
| Si | Si44 | 1.0 | 0.52681 | 0.48197 | 0.12472 | 1.0000 |
| Si | Si45 | 1.0 | 0.47352 | 0.52525 | 0.62564 | 1.0000 |
| Si | Si46 | 1.0 | 0.16566 | 0.15426 | 0.38193 | 1.0000 |
| Si | Si47 | 1.0 | 0.53216 | 0.55481 | 0.37421 | 1.0000 |
| Si | Si48 | 1.0 | 0.46966 | 0.45276 | 0.87411 | 1.0000 |
| Si | Si49 | 1.0 | 0.79539 | 0.33587 | 0.69879 | 1.0000 |
| Si | Si50 | 1.0 | 0.32650 | 0.79608 | 0.04918 | 1.0000 |
| Si | Si51 | 1.0 | 0.20572 | 0.67270 | 0.19900 | 1.0000 |
| Si | Si52 | 1.0 | 0.83728 | 0.85383 | 0.88219 | 1.0000 |

:

|    |      |     |         |         |         |        |
|----|------|-----|---------|---------|---------|--------|
| Si | Si53 | 1.0 | 0.20806 | 0.04439 | 0.17616 | 1.0000 |
| Si | Si54 | 1.0 | 0.79400 | 0.96431 | 0.67555 | 1.0000 |
| Si | Si55 | 1.0 | 0.79463 | 0.27735 | 0.81729 | 1.0000 |
| Si | Si56 | 1.0 | 0.20730 | 0.73068 | 0.31765 | 1.0000 |
